# Supplementary material for: Enantioselective construction of chiral gem-difluorinated C2-quaternary indoline via dual MgSO4–CPA-catalyzed asymmetric Mannich reactions
Source: Royal Society of Chemistry journal article supplement (doi:10.1039/d3qo02085a), 2024-01-01

## Supporting Information

### **Enantioselective Construction of Chiral *gem*-Difluorinated C2- quaternary Indoline via dual MgSO<sub>4</sub>-CPA-Catalyzed Asymmetric Mannich Reactions**

Xin-Chun Wang, Xing-Ping Wei, Chang-Peng Zou, Tao Ma, Yonghui He\*, Ganpeng Li\* and Xiao-  
Jing Zhao\*<sup>[a]</sup>

Key Laboratory of Chemistry in Ethnic Medicinal Resources, School of Ethnic Medicine, Yunnan  
Minzu University, Kunming, 650500, China

E-mail: [heyonghui@ymu.edu.cn](mailto:heyonghui@ymu.edu.cn), [ganpeng\\_li@sina.com](mailto:ganpeng_li@sina.com), [zhaoxj@ymu.edu.cn](mailto:zhaoxj@ymu.edu.cn)

## Table of Contents

|                                                                     |     |
|---------------------------------------------------------------------|-----|
| 1. General information .....                                        | S2  |
| 2. General procedure for the synthesis of substrates <b>1</b> ..... | S3  |
| 3. General procedure for the synthesis of products .....            | S4  |
| 4. Synthesis applications of <b>3aa and 3ah</b> .....               | S25 |
| 5. Crystal of <b>3aa</b> .....                                      | S27 |
| 6. References .....                                                 | S28 |
| 7. Copies of HPLC .....                                             | S28 |
| 8. Copies of NMR spectra.....                                       | S49 |

## 1. General information

All reactions were performed using oven-dried or flame-dried glassware equipped with a magnetic stir bar before used.

All reagents were purchased from commercial suppliers and used without further purification. All solvents were purified by standard operating method.

Thin-layer chromatography was performed with EMD silica gel 60 F<sub>254</sub> plates eluting with solvents indicated, visualized by a 254 nm UV lamp and stained with phosphomolybdic acid (PMA). <sup>1</sup>H NMR, <sup>13</sup>C NMR and <sup>19</sup>F NMR spectra were obtained on Bruker AM-400, Chemical shifts (δ) were quoted in ppm relative to tetramethylsilane or residual protio solvent as internal standard CDCl<sub>3</sub>: 7.26 ppm for <sup>1</sup>H NMR, 77.0 ppm for <sup>13</sup>C NMR, multiplicities are as indicated: s = singlet, d = doublet, t = triplet, q = quartet, m = multiplet. **High-resolution mass spectral analysis (HRMS) data** was measured on a Bruker impact II (Q-TOF) mass spectrum by means of the ESI technique. **Crystallographic data** were obtained from a Bruker D8 Quest diffractometer. **Optical rotations** were detected on RUDOLPH A21202-J APTV/GW. The **enantiomeric excesses** (ee) of the products were determined by high performance liquid chromatography (HPLC) analysis employing Daicel Chiralpak AD-H, OD-H and AS-H columns.

The 3,3-difluoro-3*H*-indoles were prepared according to the reported procedures. <sup>[1,5]</sup>

## 2. General procedure for the synthesis of substrates **1** and **2**

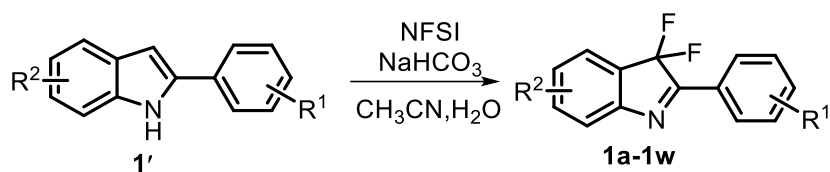

General procedure for the preparation of **1**: Unless otherwise noted, reactions were performed: 2-phenylindole **1'** (1 mmol, 1.0 eq.), Selectfluor (2 mmol, 2.0 eq.),  $\text{NaHCO}_3$  (2 mmol, 2.0 eq.), were added to a 50 mL Schlenk tube at 0 °C, followed by addition of MeCN (10 mL). The formed mixture was stirred at 0 °C under air for 1 h monitored by TLC. The resulting mixture was concentrated under vacuum, the crude product was purified by flash column chromatography using petroleum ether/ EtOAc to give the compound **1**. The compound **1a-1w** are known compound.<sup>1-5</sup>

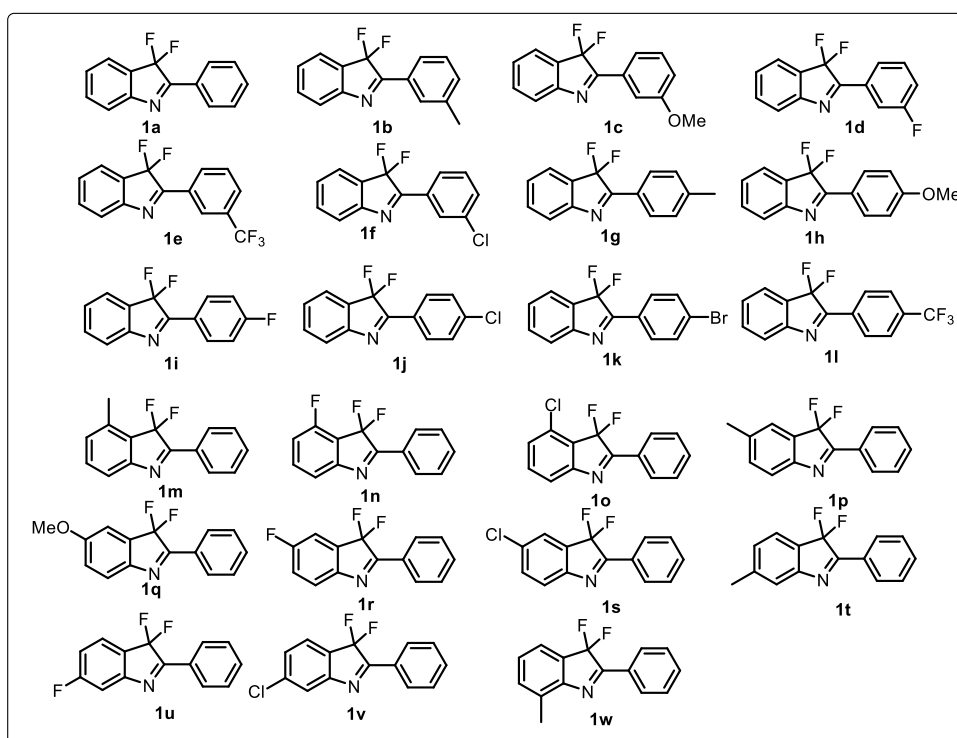

## 3. General procedure for the synthesis of products

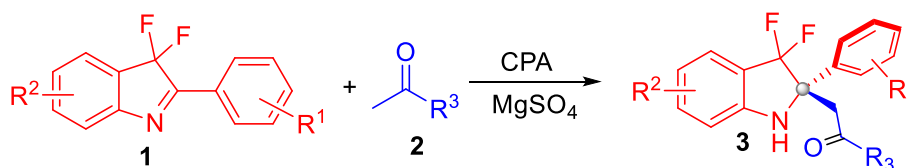

General procedure for the preparation of **3**: Unless otherwise noted, reactions were performed: **1** (0.05 mmol, 1.0 equiv), **2** (0.5 mmol, 10.0 equiv), Cat.C8 (10 mol%),  $\text{MgSO}_4$  (10 mg) in DCM (0.5

mL) at 0 °C under N<sub>2</sub>. The resulting yellow mixture was concentrated under vacuum, the crude product was purified by flash column chromatography using petroleum ether/ EtOAc/ Et<sub>3</sub>N to give the title compound **3**.

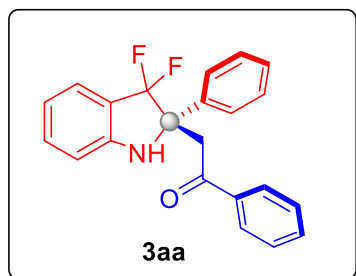

**(S)-2-(3,3-difluoro-2-phenylindolin-2-yl)-1-phenylethan-1-one (3aa)** According to the general procedure, **3aa** was obtained using 3,3-difluoro-2-phenyl-3H-indole **1a** (11.5 mg, 0.05 mmol) and acetophenone **2a** (60.0 mg, 0.5 mmol) in 90% yield (15.7 mg) and 94% ee as a white solid (silicone alkalinized with Et<sub>3</sub>N, silica gel flash chromatography: petroleum ether/ EtOAc/ Et<sub>3</sub>N = 90:1:1). R<sub>f</sub> = 0.40 (petroleum ether/EtOAc = 10:1).

**<sup>1</sup>H NMR** (400 MHz, CDCl<sub>3</sub>) δ 7.77 (dd, *J* = 8.3, 1.4 Hz, 2H), 7.53 – 7.49 (m, 2H), 7.47 – 7.43 (m, 1H), 7.37 (d, *J* = 7.5 Hz, 1H), 7.32 (t, *J* = 7.8 Hz, 2H), 7.28 – 7.21 (m, 3H), 7.19 – 7.15 (m, 1H), 6.81 – 6.73 (m, 2H), 5.73 (s, 1H), 4.30 (dd, *J* = 17.8, 1.8 Hz, 1H), 3.24 (d, *J* = 17.7 Hz, 1H).

**<sup>13</sup>C NMR** (100 MHz, CDCl<sub>3</sub>) δ 198.3 (d, *J* = 2.0 Hz), 149.6 (dd, *J* = 8.0, 5.0 Hz), 137.4 (d, *J* = 6.0 Hz), 136.8, 133.7, 133.0, 128.6, 128.2, 128.0, 127.7, 126.7 (t, *J* = 250.0 Hz), 126.5, 124.3, 120.1 (dd, *J* = 27.0, 25.0 Hz), 119.2, 111.2, 71.8 (dd, *J* = 28.0, 22.0 Hz), 42.0 (dd, *J* = 10.0, 2.0 Hz).

**<sup>19</sup>F NMR** (376 MHz, CDCl<sub>3</sub>) δ -85.3 (d, *J* = 248.2 Hz), -107.3 (d, *J* = 248.2 Hz).

**HRMS** (ESI) *m/z* calcd. for C<sub>22</sub>H<sub>17</sub>F<sub>2</sub>NO (M+Na)<sup>+</sup>: 372.1170, found 372.1165.

**Enantiomeric excess** is 94% determined by HPLC (Chiralpak AD-H, Hexane/Isopropanol 80/20, flow rate = 1.0 mL/min, 254 nm): major isomer: tr = 11.04 min; minor isomer: tr = 8.47 min.

[α]<sub>D</sub><sup>20</sup> = +389 (c = 0.35, CHCl<sub>3</sub>).

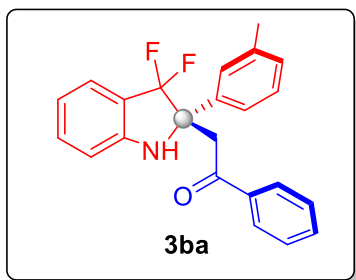

**(S)-2-(3,3-difluoro-2-(m-tolyl)indolin-2-yl)-1-phenylethan-1-one (3ba)** According to the general procedure, **3ba** was obtained using 3,3-difluoro-2-(m-tolyl)-3H-indole **1b** (12.16 mg, 0.05 mmol) and acetophenone **2a** (60.0 mg, 0.5 mmol) in 86% yield (15.63 mg) and 92% ee as a white solid (silicone alkalized with Et<sub>3</sub>N, silica gel flash chromatography: petroleum ether/ EtOAc/ Et<sub>3</sub>N = 70:1:0.5). *R<sub>f</sub>* = 0.30 (petroleum ether/EtOAc = 10:1).

<sup>1</sup>H NMR (400 MHz, CDCl<sub>3</sub>) δ 7.76 – 7.34 (m, 2H), 7.44 – 7.39 (m, 1H), 7.36 – 7.21 (m, 6H), 7.12 – 7.08 (m, 1H), 6.96 (d, *J* = 7.6 Hz, 1H), 6.77 – 6.72 (m, 2H), 5.76 (s, 1H), 4.27 (dd, *J* = 17.8, 1.9 Hz, 1H), 3.20 (dd, *J* = 17.7, 1.5 Hz, 1H), 2.21 (s, 3H).

<sup>13</sup>C NMR (100 MHz, CDCl<sub>3</sub>) δ 198.3 (d, *J* = 2.0 Hz), 149.6 (dd, *J* = 13.0, 7.0 Hz), 137.7, 137.2 (d, *J* = 5.0 Hz), 136.9, 133.6, 133.0, 128.6, 128.5, 128.1, 128.0, 127.3, 126.7 (t, *J* = 249.0 Hz), 124.3, 123.5, 120.1 (t, *J* = 25.0 Hz), 119.2, 111.2, 71.8 (dd, *J* = 27.0, 21.0 Hz), 42.0 (dd, *J* = 9.0, 2.0 Hz), 21.6.

<sup>19</sup>F NMR (376 MHz, CDCl<sub>3</sub>) δ -84.60 – -85.28 (m), -107.39 – -108.08 (m).

HRMS (ESI) *m/z* calcd. for C<sub>23</sub>H<sub>19</sub>F<sub>2</sub>NO (M+Na)<sup>+</sup>:386.1327, found 386.1334.

**Enantiomeric excess** is 92% determined by HPLC (Chiralpak AD-H, Hexane/Isopropanol 80/20, flow rate = 1.0 mL/min, 254 nm): major isomer: *tr* = 16.40 min; minor isomer: *tr* = 11.81 min.

[α]<sub>D</sub><sup>20</sup> = +182 (c = 0.3, CHCl<sub>3</sub>).

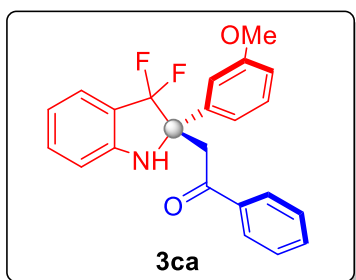

**(S)-2-(3,3-difluoro-2-(3-methoxyphenyl)indolin-2-yl)-1-phenylethan-1-one (3ca)** According to the general procedure, **3ca** was obtained using 3,3-difluoro-2-(3-methoxyphenyl)-3H-indole **1c**

(13.0 mg, 0.05 mmol) and acetophenone **2a** (60.0 mg, 0.5 mmol) in 76% yield (14.4 mg) and 90% ee as a white solid (silicone alkalized with Et<sub>3</sub>N, silica gel flash chromatography: petroleum ether/EtOAc/ Et<sub>3</sub>N = 60:1:0.5). *R<sub>f</sub>* = 0.30 (petroleum ether/EtOAc = 10:1).

<sup>1</sup>H NMR (400 MHz, CDCl<sub>3</sub>) δ 7.80 – 7.77 (m, 2H), 7.48 – 7.43 (m, 1H), 7.38 – 7.30 (m, 3H), 7.28 – 7.23 (m, 1H), 7.17 – 7.10 (m, 2H), 7.07 – 7.05 (m, 1H), 6.80 – 6.73 (m, 2H), 6.74 – 6.67 (m, 1H), 5.74 (s, 1H), 4.28 (dd, *J* = 17.8, 1.9 Hz, 1H), 3.67 (s, 3H), 3.21 (d, *J* = 17.7 Hz, 1H).

<sup>13</sup>C NMR (100 MHz, CDCl<sub>3</sub>) δ 198.3 (d, *J* = 2 Hz), 159.5, 149.6 (dd, *J* = 9.0, 6.0 Hz), 139.1 (d, *J* = 6 Hz), 136.9, 133.6, 133.0, 129.2, 128.6, 128.0, 126.7 (t, *J* = 250.0 Hz), 124.3, 120.1 (dd, *J* = 26.0, 25.0 Hz), 119.2, 118.8, 113.0, 112.9, 111.0, 71.8 (dd, *J* = 27.0, 21.0 Hz), 55.1, 42.0 (dd, *J* = 10.0, 3.0 Hz).

<sup>19</sup>F NMR (376 MHz, CDCl<sub>3</sub>) δ -91.1 (d, *J* = 248.2 Hz), -116.2 (d, *J* = 248.2 Hz).

HRMS (ESI) *m/z* calcd. for C<sub>23</sub>H<sub>19</sub>F<sub>2</sub>NO<sub>2</sub> (M+H)<sup>+</sup>: 380.1457, found 380.1450.

Enantiomeric excess is 90% determined by HPLC (Chiralpak AD-H, Hexane/Isopropanol 80/20, flow rate = 1.0 mL/min, 254 nm): major isomer: *tr* = 13.37 min; minor isomer: *tr* = 10.58 min.

[α]<sub>D</sub><sup>20</sup> = +178 (c = 0.2, CHCl<sub>3</sub>).

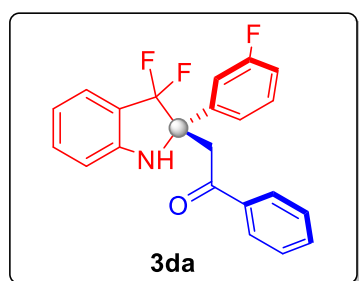

(*S*)-2-(3,3-difluoro-2-(3-fluorophenyl)indolin-2-yl)-1-phenylethan-1-one (**3da**) According to the general procedure, **3da** was obtained using 3,3-difluoro-2-(3-fluorophenyl)-3H-indole **1d** (16.0 mg, 0.05 mmol) and acetophenone **2a** (60.0 mg, 0.5 mmol) in 85% yield (16.0 mg) and 88% ee as a white solid (silicone alkalized with Et<sub>3</sub>N, silica gel flash chromatography: petroleum ether/ EtOAc/ Et<sub>3</sub>N = 90:1:1). *R<sub>f</sub>* = 0.40 (petroleum ether/EtOAc = 10:1).

<sup>1</sup>H NMR (400 MHz, CDCl<sub>3</sub>) δ 7.88 (dd, *J* = 8.5, 1.3 Hz, 2H), 7.59 – 7.55 (m, 1H), 7.50 (d, *J* = 7.4 Hz, 1H), 7.46–7.36 (m, 5H), 7.33 – 7.28 (m, 1H), 7.00 – 6.96 (m, 1.0 Hz, 1H), 6.95 – 6.82 (m, 2H), 5.87 (s, 1H), 4.37 (dd, *J* = 17.9, 1.9 Hz, 1H), 3.43 – 3.31 (m, 1H).

$^{13}\text{C}$  NMR (100 MHz,  $\text{CDCl}_3$ )  $\delta$  198.0 (d,  $J = 2.0$  Hz), 162.8 (d,  $J = 244.0$  Hz), 149.4 (dd,  $J = 8.0, 5.0$  Hz), 140.3 (dd,  $J = 6.0, 5.0$  Hz), 136.6, 133.8, 133.1, 129.7 (d,  $J = 5.0$  Hz), 129.6, 128.7, 127.9, 126.6 (t,  $J = 250.0$  Hz), 124.3, 124.1, 122.1 (d,  $J = 3.0$  Hz), 119.8 (dd,  $J = 26.0, 25.0$  Hz), 114.7 (d,  $J = 21.0$  Hz), 114.1 (d,  $J = 21.0$  Hz), 111.3, 71.6 (dd,  $J = 28.0, 22.0$  Hz), 42.0 (dd,  $J = 10.0, 3.0$  Hz).

$^{19}\text{F}$  NMR (376 MHz,  $\text{CDCl}_3$ )  $\delta$  -84.4 (d,  $J = 248.2$  Hz), -107.6 (d,  $J = 248.2$  Hz), -112.7.

HRMS (ESI)  $m/z$  calcd. for  $\text{C}_{22}\text{H}_{16}\text{F}_3\text{NO}$  ( $\text{M}+\text{Na}$ ) $^+$ :390.1076, found 390.1079.

Enantiomeric excess is 88% determined by HPLC (Chiralpak AD-H, Hexane/Isopropanol 80/20, flow rate = 1.0 mL/min, 254 nm): major isomer:  $t_r = 13.31$  min; minor isomer:  $t_r = 10.59$  min.

$[\alpha]_D^{20} = +280$  ( $c = 0.2, \text{CHCl}_3$ ).

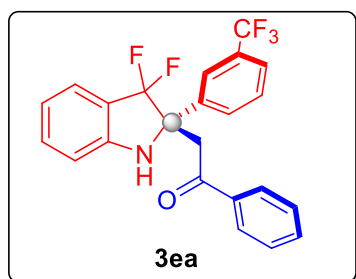

**(S)-2-(3,3-difluoro-2-(3-(trifluoromethyl)phenyl)indolin-2-yl)-1-phenylethan-1-one (3ea)**

According to the general procedure, **3ea** was obtained using 3,3-difluoro-2-(3-(trifluoromethyl)phenyl)-3H-indole **1e** (14.9 mg, 0.05 mmol) and acetophenone **2a** (60.0 mg, 0.5 mmol) in 86% yield (17.3 mg) and 86% ee as a white solid (silicone alkalized with  $\text{Et}_3\text{N}$ , silica gel flash chromatography: petroleum ether/ EtOAc/  $\text{Et}_3\text{N} = 90:1:1$ ).  $R_f = 0.40$  (petroleum ether/EtOAc = 10:1).

$^1\text{H}$  NMR (400 MHz,  $\text{CDCl}_3$ )  $\delta$  7.97 (s, 1H), 7.87 (d,  $J = 7.7$  Hz, 2H), 7.80 (d,  $J = 7.9$  Hz, 1H), 7.59 – 7.53 (m, 2H), 7.51 – 7.36 (m, 5H), 6.95 – 6.85 (m, 2H), 5.87 (s, 1H), 4.38 (d,  $J = 17.9$  Hz, 1H), 3.39 (d,  $J = 17.8$  Hz, 1H).

$^{13}\text{C}$  NMR (100 MHz,  $\text{CDCl}_3$ )  $\delta$  198.0, 149.2 (d,  $J = 8.0, 5.0$  Hz), 138.7 (d,  $J = 6.0$  Hz), 136.5, 133.9, 133.2, 131.6 (q,  $J = 32.0$  Hz), 129.8, 128.71, 128.68, 128.0, 126.6 (t,  $J = 250.0$  Hz), 124.7 (q,  $J = 4.0$  Hz), 124.3, 124.1 (t,  $J = 271.0$  Hz), 123.7 (d,  $J = 4.0$  Hz), 119.9 - 119.5 (m), 119.7, 111.5, 71.7 (dd,  $J = 28.0, 21.0$  Hz), 42.1 (dd,  $J = 9.0, 3.0$  Hz).

$^{19}\text{F}$  NMR (376 MHz,  $\text{CDCl}_3$ )  $\delta$  -62.4, -82.7 (dd,  $J = 248.2, 7.5$  Hz), -108.7 (dd,  $J = 248.2, 7.5$  Hz).

HRMS (ESI)  $m/z$  calcd. for  $\text{C}_{23}\text{H}_{16}\text{F}_5\text{NO}$  ( $\text{M}+\text{Na}$ ) $^+$ :418.1225, found 418.1235.



**Enantiomeric excess** is 86% determined by HPLC (Chiralpak AD-H, Hexane/Isopropanol 80/20, flow rate = 1.0 mL/min, 254 nm): major isomer: tr = 7.70 min; minor isomer: tr = 5.46 min.

$[\alpha]_D^{20} = +321$  (c = 0.2, CHCl<sub>3</sub>).

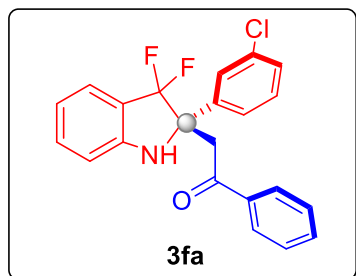

**(S)-2-(2-(3-chlorophenyl)-3,3-difluoroindolin-2-yl)-1-phenylethan-1-one (3fa)** According to the general procedure, **3fa** was obtained using 2-(3-chlorophenyl)-3,3-difluoro-3H-indole **1f** (13.2 mg, 0.05 mmol) and acetophenone **2a** (60.0 mg, 0.5 mmol) in 83% yield (15.9 mg) and 88% ee as a white solid (silicone alkalinized with Et<sub>3</sub>N, silica gel flash chromatography: petroleum ether/ EtOAc/ Et<sub>3</sub>N = 90:1:1). *R<sub>f</sub>* = 0.40 (petroleum ether/EtOAc = 10:1).

**<sup>1</sup>H NMR** (400 MHz, CDCl<sub>3</sub>) δ 7.89 – 7.81 (m, 2H), 7.64 (s, 1H), 7.57 – 7.52 (m, 1H), 7.48 – 7.38 (m, 4H), 7.34 (t, *J* = 7.6 Hz, 1H), 7.26 – 7.20 (m, 2H), 6.92 – 6.79 (m, 2H), 5.80 (s, 1H), 4.30 (dd, *J* = 17.9, 1.9 Hz, 1H), 3.33 (d, *J* = 17.9 Hz, 1H).

**<sup>13</sup>C NMR** (100 MHz, CDCl<sub>3</sub>) δ 198.0 (d, *J* = 1.0 Hz), 149.3 (dd, *J* = 8.0, 5.0 Hz), 139.7 (d, *J* = 5.0 Hz), 136.6, 134.4, 133.8, 133.2, 129.4, 128.7, 127.98, 127.96, 127.1, 126.6 (t, *J* = 250.0 Hz), 124.6, 124.3, 119.8 (dd, *J* = 26.0, 24.0 Hz), 119.5, 111.4, 71.6 (dd, *J* = 27.0, 21.0 Hz), 42.0 (dd, *J* = 10.0, 3.0 Hz).

**<sup>19</sup>F NMR** (376 MHz, CDCl<sub>3</sub>) δ -83.3 (d, *J* = 248.2 Hz), -107.9 (d, *J* = 248.2 Hz).

**HRMS** (ESI) *m/z* calcd. for C<sub>22</sub>H<sub>16</sub>ClF<sub>2</sub>NO (M+H)<sup>+</sup>: 384.0961, found 384.0953.

**Enantiomeric excess** is 88% determined by HPLC (Chiralpak AD-H, Hexane/Isopropanol 80/20, flow rate = 1.0 mL/min, 254 nm): major isomer: tr = 9.62 min; minor isomer: tr = 7.56 min.

$[\alpha]_D^{20} = +290$  (c = 0.2, CHCl<sub>3</sub>).

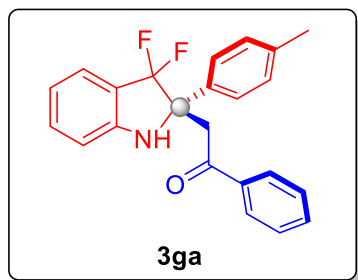

**(S)-2-(3,3-difluoro-2-(p-tolyl)indolin-2-yl)-1-phenylethan-1-one (3ga)** According to the general procedure, **3ga** was obtained using 3,3-difluoro-2-(p-tolyl)-3H-indole **1g** (12.2 mg, 0.05 mmol) and acetophenone **2a** (60.0 mg, 0.5 mmol) in 96% yield (17.4 mg) and 90% ee as a white solid (silicone alkalinized with Et<sub>3</sub>N, silica gel flash chromatography: petroleum ether/ EtOAc/ Et<sub>3</sub>N = 90:1:1). R<sub>f</sub> = 0.40 (petroleum ether/EtOAc = 10:1).

<sup>1</sup>H NMR (400 MHz, CDCl<sub>3</sub>) δ 7.91 – 7.86 (m, 2H), 7.58 – 7.54 (m, 1H), 7.49 – 7.40 (m, 5H), 7.35 (t, *J* = 7.7 Hz, 1H), 7.14 (d, *J* = 8.0 Hz, 2H), 6.89 – 6.82 (m, 2H), 5.86 (s, 1H), 4.39 (dd, *J* = 17.8, 1.8 Hz, 1H), 3.33 (d, *J* = 17.8 Hz, 1H), 2.31 (s, 3H).

<sup>13</sup>C NMR (100 MHz, CDCl<sub>3</sub>) δ 198.3 (d, *J* = 2.0 Hz), 149.7 (dd, *J* = 8.0, 5.0 Hz), 137.3, 136.9, 134.4 (d, *J* = 26.0 Hz), 133.6, 133.0, 129.0, 128.6, 128.0, 126.7 (t, *J* = 249.0 Hz), 126.4, 124.4, 120.1 (t, *J* = 2.0 Hz), 119.1, 111.1, 71.7 (dd, *J* = 28.0, 22.0 Hz), 41.9 (dd, *J* = 9.0, 2.0 Hz), 21.02.

<sup>19</sup>F NMR (376 MHz, CDCl<sub>3</sub>) δ -86.0 (d, *J* = 248.2 Hz), -107.2 (d, *J* = 244.4 Hz).

HRMS (ESI) *m/z* calcd. for C<sub>23</sub>H<sub>19</sub>F<sub>2</sub>NO (M+Na)<sup>+</sup>: 386.1327, found 386.1329.

**Enantiomeric excess** is 90% determined by HPLC (Chiralpak AD-H, Hexane/Isopropanol 80/20, flow rate = 1.0 mL/min, 254 nm): major isomer: tr = 8.03 min; minor isomer: tr = 12.67 min.

[α]<sub>D</sub><sup>20</sup> = +237 (c = 0.2, CHCl<sub>3</sub>).

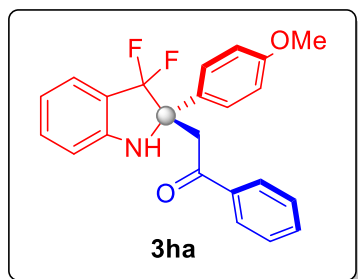

**(S)-2-(3,3-difluoro-2-(4-methoxyphenyl)indolin-2-yl)-1-phenylethan-1-one (3ha)** According to the general procedure, **3ha** was obtained using 3,3-difluoro-2-(4-methoxyphenyl)-3H-indole **1h** (13.0 mg, 0.05 mmol) and acetophenone **2a** (60.0 mg, 0.5 mmol) in 95% yield (18.0 mg) and 92%

ee as a white solid (silicone alkalized with Et<sub>3</sub>N, silica gel flash chromatography: petroleum ether/EtOAc/ Et<sub>3</sub>N = 60:1:0.5). R<sub>f</sub> = 0.20 (petroleum ether/EtOAc = 10:1).

<sup>1</sup>H NMR (400 MHz, CDCl<sub>3</sub>) δ 7.93 – 7.83 (m, 2H), 7.58 – 7.40 (m, 6H), 7.34 (t, *J* = 7.7 Hz, 1H), 6.96 – 6.77 (m, 4H), 5.87 (s, 1H), 4.36 (dd, *J* = 17.8, 1.8 Hz, 1H), 3.76 (s, 3H), 3.30 (d, *J* = 17.7 Hz, 1H).

<sup>13</sup>C NMR (100 MHz, CDCl<sub>3</sub>) δ 198.4 (d, *J* = 1.0 Hz), 159.0, 149.7 (dd, *J* = 8.0, 6.0 Hz), 136.9, 133.6, 132.9, 129.3 (d, *J* = 6.0 Hz), 128.6, 128.0, 127.7, 126.7 (t, *J* = 249.0 Hz), 124.4, 120.2 (dd, *J* = 25.0, 2.0 Hz), 119.2, 113.7, 111.2, 71.5 (dd, *J* = 27.0, 21.0 Hz), 55.1, 41.8 (dd, *J* = 10.0, 3.0 Hz).

<sup>19</sup>F NMR (376 MHz, CDCl<sub>3</sub>) δ -85.9 (d, *J* = 248.2 Hz), -107.6 (d, *J* = 248.2 Hz).

HRMS (ESI) *m/z* calcd. for C<sub>23</sub>H<sub>19</sub>F<sub>2</sub>NO<sub>2</sub> (M+Na)<sup>+</sup>:402.1276, found 402.1280.

**Enantiomeric excess** is 92% determined by HPLC (Chiralpak AD-H, Hexane/Isopropanol 95/5, flow rate = 1.0 mL/min, 254 nm): major isomer: tr = 46.28 min; minor isomer: tr = 26.79 min.

[α]<sub>D</sub><sup>20</sup> = +273 (c = 0.2, CHCl<sub>3</sub>).

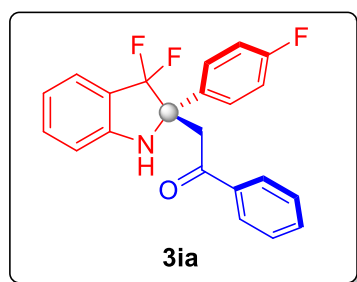

**(S)-2-(3,3-difluoro-2-(4-fluorophenyl)indolin-2-yl)-1-phenylethan-1-one (3ia)** According to the general procedure, **3ia** was obtained using 3,3-difluoro-2-(4-fluorophenyl)-3H-indole **1i** (12.4 mg, 0.05 mmol) and acetophenone **2a** (60.0 mg, 0.5 mmol) in 91% yield (17.1 mg) and 94% ee as a white solid (silicone alkalized with Et<sub>3</sub>N, silica gel flash chromatography: petroleum ether/ EtOAc/ Et<sub>3</sub>N = 90:1:1). R<sub>f</sub> = 0.40 (petroleum ether/EtOAc = 10:1).

<sup>1</sup>H NMR (400 MHz, CDCl<sub>3</sub>) δ 7.87 (dd, *J* = 8.4, 1.4 Hz, 2H), 7.61 – 7.54 (m, 3H), 7.49 – 7.41 (m, 3H), 7.36 (t, *J* = 7.7 Hz, 1H), 7.06 – 6.98 (m, 2H), 6.92 – 6.83 (m, 2H), 5.86 (s, 1H), 4.35 (dd, *J* = 17.9, 1.9 Hz, 1H), 3.33 (d, *J* = 17.8 Hz, 1H).

<sup>13</sup>C NMR (100 MHz, CDCl<sub>3</sub>) δ 198.2 (d, *J* = 2.0 Hz), 162.3 (d, *J* = 245.0 Hz), 149.4 (dd, *J* = 8.0, 5.0 Hz), 136.7, 133.8, 133.2 (dd, *J* = 6.0, 4.0 Hz), 133.1, 128.7, 128.3 (d, *J* = 8.0 Hz), 128.0, 126.6

(t,  $J = 249$  Hz), 124.4, 120.0 (dd,  $J = 26.0, 25.0$  Hz), 119.4, 115.1 (d,  $J = 21.0$  Hz), 111.3, 71.5 (dd,  $J = 27.0, 21.0$  Hz), 42.0 (dd,  $J = 10.0, 3.0$  Hz).

$^{19}\text{F}$  NMR (376 MHz,  $\text{CDCl}_3$ )  $\delta$  -84.5 (d,  $J = 248.2$  Hz), -108.1 (d,  $J = 248.2$  Hz), -115.0.

HRMS (ESI)  $m/z$  calcd. for  $\text{C}_{22}\text{H}_{16}\text{F}_3\text{NO}$  ( $\text{M}+\text{H}$ ) $^+$ :368.1257, found 368.1261.

Enantiomeric excess is 94% determined by HPLC (Chiralpak AD-H, Hexane/Isopropanol 80/20, flow rate = 1.0 mL/min, 254 nm): major isomer:  $t_r = 10.88$  min; minor isomer:  $t_r = 8.05$  min.

$[\alpha]_D^{20} = +268$  ( $c = 0.2, \text{CHCl}_3$ ).

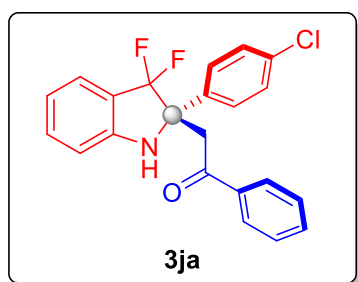

(S)-2-(2-(4-chlorophenyl)-3,3-difluoroindolin-2-yl)-1-phenylethan-1-one (**3ja**) According to the general procedure, **3ja** was obtained using 2-(4-chlorophenyl)-3,3-difluoro-3H-indole **1j** (13.2 mg, 0.05 mmol) and acetophenone **2a** (60.0 mg, 0.5 mmol) in 84% yield (16.1 mg) and 90% ee as a white solid (silicone alkalinized with  $\text{Et}_3\text{N}$ , silica gel flash chromatography: petroleum ether/ EtOAc/  $\text{Et}_3\text{N} = 90:1:1$ ).  $R_f = 0.40$  (petroleum ether/EtOAc = 10:1).

$^1\text{H}$  NMR (400 MHz,  $\text{CDCl}_3$ )  $\delta$  7.89 – 7.84 (m, 2H), 7.59 – 7.53 (m, 3H), 7.49 – 7.41 (m, 3H), 7.38 – 7.34 (m, 1H), 7.33 – 7.27 (m, 2H), 6.91 – 6.83 (m, 2H), 5.83 (d,  $J = 2.3$  Hz, 1H), 4.34 (dd,  $J = 17.9, 1.9$  Hz, 1H), 3.34 (d,  $J = 17.9$  Hz, 1H).

$^{13}\text{C}$  NMR (100 MHz,  $\text{CDCl}_3$ )  $\delta$  198.1 (d,  $J = 2.0$  Hz), 149.4 (dd,  $J = 8.0, 5.0$  Hz), 136.7, 136.1 (d,  $J = 6.0$  Hz), 133.8, 133.7, 133.1, 128.7, 128.4, 128.02, 127.96, 126.6 (t,  $J = 249.0$  Hz), 124.4, 119.9 (dd,  $J = 27.0, 25.0$  Hz), 119.5, 111.3, 71.5 (dd,  $J = 27.0, 6.0$  Hz), 42.0 (dd,  $J = 10.0, 3.0$  Hz).

$^{19}\text{F}$  NMR (376 MHz,  $\text{CDCl}_3$ )  $\delta$  -84.4 (d,  $J = 248.2$  Hz), -107.8 (d,  $J = 248.2$  Hz).

HRMS (ESI)  $m/z$  calcd. for  $\text{C}_{22}\text{H}_{16}\text{ClF}_2\text{NO}$  ( $\text{M}+\text{H}$ ) $^+$ :384.0961, found 384.0963.

Enantiomeric excess is 90% determined by HPLC (Chiralpak AD-H, Hexane/Isopropanol 80/20, flow rate = 1.0 mL/min, 254 nm): major isomer:  $t_r = 11.6$  min; minor isomer:  $t_r = 8.80$  min.

$[\alpha]_D^{20} = +169$  ( $c = 0.2, \text{CHCl}_3$ ).

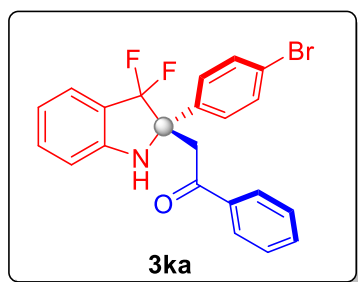

**(S)-2-(2-(4-bromophenyl)-3,3-difluoroindolin-2-yl)-1-phenylethan-1-one (3ka)** According to the general procedure, **3ka** was obtained using 2-(4-bromophenyl)-3,3-difluoro-3H-indole **1k** (15.4 mg, 0.05 mmol) and acetophenone **2a** (60.0 mg, 0.5 mmol) in 75% yield (16.1 mg) and 88% ee as a white solid (silicone alkalized with Et<sub>3</sub>N, silica gel flash chromatography: petroleum ether/EtOAc/ Et<sub>3</sub>N = 90:1:1). *R<sub>f</sub>* = 0.40 (petroleum ether/EtOAc = 10:1).

<sup>1</sup>H NMR (400 MHz, CDCl<sub>3</sub>) δ 7.92 – 7.83 (m, 2H), 7.59 – 7.55 (m, 1H), 7.46 (m, 7H), 7.36 (t, *J* = 7.8 Hz, 1H), 6.93 – 6.81 (m, 2H), 5.84 (s, 1H), 4.34 (d, *J* = 17.9 Hz, 1H), 3.35 (d, *J* = 17.9 Hz, 1H).

<sup>13</sup>C NMR (100 MHz, CDCl<sub>3</sub>) δ 198.0 (d, *J* = 1.0 Hz), 149.4 (dd, *J* = 8.0, 6.0 Hz), 136.7 (d, *J* = 5.0 Hz), 136.6, 133.8, 133.1, 131.3, 128.7, 128.4, 127.9, 126.5 (t, *J* = 249.0 Hz), 124.3, 121.7, 119.8 (t, *J* = 25.0 Hz), 119.5, 111.3, 71.6 (dd, *J* = 28.0, 21.0 Hz), 41.9 (dd, *J* = 9.0, 2.0 Hz).

<sup>19</sup>F NMR (376 MHz, CDCl<sub>3</sub>) δ -84.3 (dd, *J* = 248.2, 11.28 Hz), -107.7 (dd, *J* = 248.2, 15.04 Hz).

**HRMS** (ESI) *m/z* calcd. for C<sub>22</sub>H<sub>16</sub>BrF<sub>2</sub>NO (M+H)<sup>+</sup>:428.0456, found 428.0452.

**Enantiomeric excess** is 88% determined by HPLC (Chiralpak AD-H, Hexane/Isopropanol 80/20, flow rate = 1.0 mL/min, 254 nm): major isomer: *tr* = 12.99 min; minor isomer: *tr* = 9.80 min.

[α]<sup>20</sup><sub>D</sub> = +277 (c = 0.2, CHCl<sub>3</sub>).

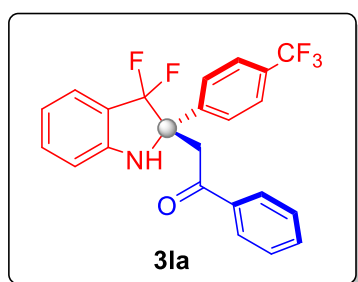

**(S)-2-(3,3-difluoro-2-(4-(trifluoromethyl)phenyl)indolin-2-yl)-1-phenylethan-1-one (3la)**

According to the general procedure, **3la** was obtained using 3,3-difluoro-2-(4-(trifluoromethyl)phenyl)-3H-indole **1l** (14.9 mg, 0.05 mmol) and acetophenone **2a** (60.0 mg, 0.5 mmol) in 86% yield (17.9 mg) and 66% ee as a white solid (silicone alkalized with Et<sub>3</sub>N, silica gel

flash chromatography: petroleum ether/ EtOAc/ Et<sub>3</sub>N = 90:1:1).  $R_f$  = 0.40 (petroleum ether/EtOAc = 10:1).

<sup>1</sup>H NMR (400 MHz, CDCl<sub>3</sub>)  $\delta$  7.91 – 7.86 (m, 2H), 7.78 (d,  $J$  = 8.2 Hz, 2H), 7.64 – 7.55 (m, 3H), 7.50 (d,  $J$  = 7.6 Hz, 1H), 7.46 – 7.37 (m, 3H), 6.95 – 6.85 (m, 2H), 5.86 (s, 1H), 4.40 (dd,  $J$  = 18.2, 1.9 Hz, 1H), 3.43 (d,  $J$  = 18.0 Hz, 1H).

<sup>13</sup>C NMR (100 MHz, CDCl<sub>3</sub>)  $\delta$  197.9 (d,  $J$  = 1.0 Hz), 149.3 (dd,  $J$  = 8.0, 5.0 Hz), 141.7 (d,  $J$  = 6.0 Hz), 136.4, 134.0, 133.2, 129.8 (q,  $J$  = 32.0 Hz), 128.7, 127.9, 127.0, 126.6 (t,  $J$  = 250.0 Hz), 125.2 (q,  $J$  = 3.2 Hz), 124.4, 124.0 (d,  $J$  = 270.0 Hz), 119.9 – 119.4 (m), 119.6, 111.4, 71.7 (dd,  $J$  = 28.0, 21.0 Hz), 42.2 (dd,  $J$  = 9.0, 2.0 Hz).

<sup>19</sup>F NMR (376 MHz, CDCl<sub>3</sub>)  $\delta$  -62.5, -83.7 (d,  $J$  = 248.2 Hz), -107.7 (d,  $J$  = 248.2, 7.5 Hz).

HRMS (ESI)  $m/z$  calcd. for C<sub>23</sub>H<sub>16</sub>F<sub>2</sub>NO (M+H)<sup>+</sup>:418.1225, found 418.1219.

Enantiomeric excess is 66% determined by HPLC (Chiralpak AD-H, Hexane/Isopropanol 80/20, flow rate = 1.0 mL/min, 254 nm): major isomer:  $t_r$  = 7.51 min; minor isomer:  $t_r$  = 6.83 min.

$[\alpha]_D^{20}$  = +117 (c = 0.2, CHCl<sub>3</sub>).

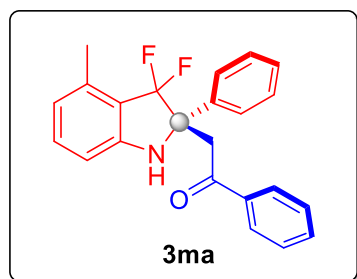

(S)-2-(3,3-difluoro-4-methyl-2-phenylindolin-2-yl)-1-phenylethan-1-one (**3ma**) According to the general procedure, **3ma** was obtained using 3,3-difluoro-4-methyl-2-phenyl-3H-indole **1m** (12.2 mg, 0.05 mmol) and acetophenone **2a** (60.0 mg, 0.5 mmol) in 86% yield (15.6 mg) and 98% ee as a white solid (silicone alkalized with Et<sub>3</sub>N, silica gel flash chromatography: petroleum ether/ EtOAc/ Et<sub>3</sub>N = 90:1:1).  $R_f$  = 0.40 (petroleum ether/EtOAc = 10:1).

<sup>1</sup>H NMR (400 MHz, CDCl<sub>3</sub>)  $\delta$  7.78 (d,  $J$  = 7.2 Hz, 2H), 7.51 (d,  $J$  = 7.6 Hz, 2H), 7.45 (t,  $J$  = 7.4 Hz, 1H), 7.33 (t,  $J$  = 7.7 Hz, 2H), 7.24 (t,  $J$  = 7.4 Hz, 2H), 7.19 – 7.10 (m, 2H), 6.55 (dd,  $J$  = 11.1, 7.8 Hz, 2H), 5.52 (s, 1H), 4.31 (dd,  $J$  = 17.8, 1.9 Hz, 1H), 3.27 (d,  $J$  = 18.0 Hz, 1H), 2.33 (s, 3H).

<sup>13</sup>C NMR (100 MHz, CDCl<sub>3</sub>)  $\delta$  198.3 (d,  $J$  = 2.0 Hz), 149.9 (d,  $J$  = 7.0, 5.0 Hz), 137.6 (d,  $J$  = 6.0 Hz), 137.2 (d,  $J$  = 2.0 Hz), 136.8, 133.6, 132.8, 128.6, 128.2, 128.0 (t,  $J$  = 251.0 Hz), 128.0, 127.6,

126.5, 121.0, 117.9 (t,  $J = 24.0$  Hz), 108.6, 71.3 (dd,  $J = 48.0, 21$  Hz), 42.2 (dd,  $J = 10.0, 2.0$  Hz), 17.2.

$^{19}\text{F}$  NMR (376 MHz,  $\text{CDCl}_3$ )  $\delta$ -86.5(d,  $J = 248.2$  Hz), -105.2 (d,  $J = 248.2$  Hz).

HRMS (ESI)  $m/z$  calcd. for  $\text{C}_{23}\text{H}_{19}\text{F}_2\text{NO}$  ( $\text{M}+\text{H}$ ) $^+$ :364.1507, found 364.1503.

Enantiomeric excess is 98% determined by HPLC (Chiralpak AD-H, Hexane/Isopropanol 80/20, flow rate = 1.0 mL/min, 254 nm): major isomer:  $t_r = 7.12$  min; minor isomer:  $t_r = 8.62$  min.

$[\alpha]_D^{20} = +178$  (c = 0.2,  $\text{CHCl}_3$ ).

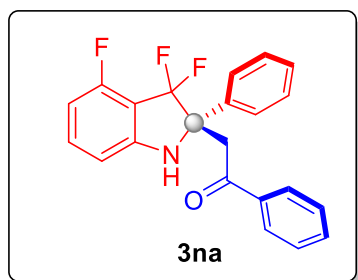

(S)-1-phenyl-2-(3,3,4-trifluoro-2-phenylindolin-2-yl)ethan-1-one (**3na**) According to the general procedure, **3na** was obtained using 3,3,4-trifluoro-2-phenyl-3H-indole **1n** (12.4 mg, 0.05 mmol) and acetophenone **2a** (60.0 mg, 0.5 mmol) in 85% yield (15.6 mg) and 94% ee as a white solid (silicone alkalinized with  $\text{Et}_3\text{N}$ , silica gel flash chromatography: petroleum ether/  $\text{EtOAc}$ /  $\text{Et}_3\text{N} = 90:1:1$ ).  $R_f = 0.40$  (petroleum ether/ $\text{EtOAc} = 10:1$ ).

$^1\text{H}$  NMR (400 MHz,  $\text{CDCl}_3$ )  $\delta$  7.90 (d,  $J = 6.9$  Hz, 2H), 7.63 – 7.55 (m, 3H), 7.44 (t,  $J = 7.7$  Hz, 2H), 7.40 – 7.29 (m, 4H), 6.65 – 6.59 (m, 1H), 6.53 (t,  $J = 8.7$  Hz, 1H), 6.09 (s, 1H), 4.47 (dd,  $J = 17.9, 1.8$  Hz, 1H), 3.40 (d,  $J = 17.8$  Hz, 1H).

$^{13}\text{C}$  NMR (100 MHz,  $\text{CDCl}_3$ )  $\delta$  198.1 (d,  $J = 1.0$  Hz), 151.9 (d,  $J = 252.0$  Hz), 151.9 (dd,  $J = 12.0, 7.0$  Hz), 136.8 (d,  $J = 6.0$  Hz), 136.6, 135.0 (d,  $J = 9.0$  Hz), 133.8, 128.7, 128.3, 127.94, 127.87, 126.4, 125.9 (t,  $J = 250.0$  Hz), 107.1 – 106.43 (m), 106.8 (d,  $J = 3.0$  Hz), 105.9 (d,  $J = 19.0$  Hz), 72.2 (dd,  $J = 27.0, 22.0$  Hz), 41.9 (dd,  $J = 10.0, 2.0$  Hz).

$^{19}\text{F}$  NMR (376 MHz,  $\text{CDCl}_3$ )  $\delta$  -85.4(d,  $J = 251.9, 7.5$  Hz), -105.0(d,  $J = 251.9, 7.5$  Hz), -117.56 – -117.57 (m).

HRMS (ESI)  $m/z$  calcd. for  $\text{C}_{22}\text{H}_{16}\text{F}_3\text{NO}$  ( $\text{M}+\text{H}$ ) $^+$ :390.1076, found 390.1077.

Enantiomeric excess is 94% determined by HPLC (Chiralpak AD-H, Hexane/Isopropanol 80/20, flow rate = 0.50 mL/min, 254 nm): major isomer:  $t_r = 18.34$  min; minor isomer:  $t_r = 17.42$  min.

$[\alpha]_D^{20} = +178$  ( $c = 0.2$ ,  $\text{CHCl}_3$ ).

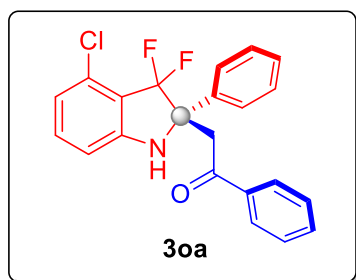

**(S)-1-phenyl-2-(3,3,4-trifluoro-2-phenylindolin-2-yl)ethan-1-one (3oa)** According to the general procedure, **3oa** was obtained using 4-chloro-3,3-difluoro-2-phenyl-3H-indole **1o** (13.2 mg, 0.05 mmol) and acetophenone **2a** (60.0 mg, 0.5 mmol) in 88% yield (16.8 mg) and 94% ee as a white solid (silicone alkalinized with  $\text{Et}_3\text{N}$ , silica gel flash chromatography: petroleum ether/ EtOAc/  $\text{Et}_3\text{N}$  = 90:1:1).  $R_f = 0.40$  (petroleum ether/EtOAc = 10:1).

**$^1\text{H}$  NMR** (400 MHz,  $\text{CDCl}_3$ )  $\delta$  7.76 (d,  $J = 7.0$  Hz, 2H), 7.49 – 7.42 (m, 3H), 7.31 (t,  $J = 7.7$  Hz, 2H), 7.23 (t,  $J = 7.4$  Hz, 2H), 7.19 – 7.11 (m, 2H), 6.69 (d,  $J = 7.9$  Hz, 1H), 6.60 (d,  $J = 8.0$  Hz, 1H), 5.92 (s, 1H), 4.33 (dd,  $J = 18.0, 1.9$  Hz, 1H), 3.25 (d,  $J = 17.5$  Hz, 1H).

**$^{13}\text{C}$  NMR** (100 MHz,  $\text{CDCl}_3$ )  $\delta$  198.1 (d,  $J = 2.0$  Hz), 151.4 (dd,  $J = 7.0, 5.0$  Hz), 136.8 (d,  $J = 6.0$  Hz), 136.6, 134.0, 133.8, 131.8, 128.7, 128.3, 128.0, 127.9, 126.4, 126.2 (t,  $J = 251.0$  Hz), 120.0, 116.9 (t,  $J = 24.0$  Hz), 109.5, 71.9 (dd,  $J = 27.0, 21.0$  Hz), 42.0 (dd,  $J = 10.0, 2.0$  Hz).

**$^{19}\text{F}$  NMR** (376 MHz,  $\text{CDCl}_3$ )  $\delta$  -87.4 (d,  $J = 251.9$  Hz), -106.2 (d,  $J = 248.2$  Hz)

**HRMS** (ESI)  $m/z$  calcd. for  $\text{C}_{22}\text{H}_{16}\text{ClF}_2\text{NO}$  ( $\text{M}+\text{H}$ ) $^+$ : 384.0961, found 384.0966.

**Enantiomeric excess** is 94% determined by HPLC (Chiralpak AD-H, Hexane/Isopropanol 80/20, flow rate = 0.5 mL/min, 254 nm): major isomer:  $t_r = 19.65$  min; minor isomer:  $t_r = 17.13$  min.

$[\alpha]_D^{20} = +401$  ( $c = 0.2$ ,  $\text{CHCl}_3$ ).

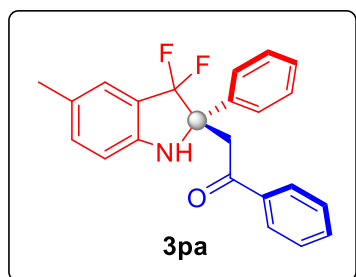

**(S)-2-(3,3-difluoro-5-methyl-2-phenylindolin-2-yl)-1-phenylethan-1-one (3pa)** According to the



general procedure, **3pa** was obtained using 3,3-difluoro-5-methyl-2-phenyl-3H-indole **1p** (12.2 mg, 0.05 mmol) and acetophenone **2a** (60.0 mg, 0.5 mmol) in 89% yield (16.2 mg) and 94% ee as a white solid (silicone alkalized with Et<sub>3</sub>N, silica gel flash chromatography: petroleum ether/ EtOAc/ Et<sub>3</sub>N = 90:1:1). R<sub>f</sub> = 0.40 (petroleum ether/EtOAc = 10:1).

<sup>1</sup>H NMR (400 MHz, CDCl<sub>3</sub>) δ 7.90 – 7.85 (m, 2H), 7.63 (d, *J* = 7.6 Hz, 2H), 7.58 – 7.54 (m, 1H), 7.43 (t, *J* = 7.7 Hz, 2H), 7.35 (t, *J* = 7.4 Hz, 2H), 7.29 (d, *J* = 8.5 Hz, 2H), 7.19 (d, *J* = 8.2 Hz, 1H), 6.79 (d, *J* = 8.1 Hz, 1H), 5.77 (s, 1H), 4.40 (dd, *J* = 17.8, 1.8 Hz, 1H), 3.35 (d, *J* = 17.7 Hz, 1H), 2.34 (s, 3H).

<sup>13</sup>C NMR (100 MHz, CDCl<sub>3</sub>) δ 198.3 (d, *J* = 2.0 Hz), 147.4 (dd, *J* = 8.0, 6.0 Hz), 137.6 (d, *J* = 5.0 Hz), 136.9, 133.7, 133.6, 128.8 (t, *J* = 10.0 Hz), 128.6, 128.2, 128.0, 127.6, 126.9 (t, *J* = 249.0 Hz), 126.5, 124.3, 120.2 (t, *J* = 25.0 Hz), 111.2, 72.0 (dd, *J* = 27.0, 21.0 Hz), 42.0 (dd, *J* = 9.0, 2.0 Hz), 20.7.

<sup>19</sup>F NMR (376 MHz, CDCl<sub>3</sub>) δ -85.7 (d, *J* = 248.2 Hz), -107.4 (d, *J* = 248.2 Hz).

HRMS (ESI) *m/z* calcd. for C<sub>23</sub>H<sub>19</sub>F<sub>2</sub>NO (M+H)<sup>+</sup>:364.1507, found 364.1504.

Enantiomeric excess is 94% determined by HPLC (Chiralpak AD-H, Hexane/Isopropanol 80/20, flow rate = 1.0 mL/min, 254 nm): major isomer: tr = 10.47 min; minor isomer: tr = 8.24 min.

[α]<sub>D</sub><sup>20</sup> = +206 (c = 0.2, CHCl<sub>3</sub>).

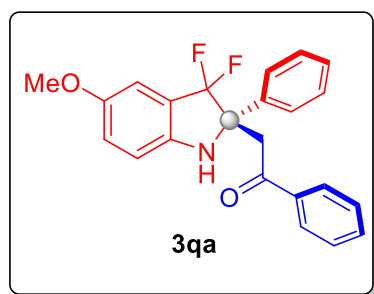

(S)-2-(3,3-difluoro-5-methoxy-2-phenylindolin-2-yl)-1-phenylethan-1-one (**3qa**) According to the general procedure, **3qa** was obtained using 3,3-difluoro-5-methoxy-2-phenyl-3H-indole **1q** (13.0 mg, 0.05 mmol) and acetophenone **2a** (60.0 mg, 0.5 mmol) in 85% yield (16.1 mg) and 94% ee as a white solid (silicone alkalized with Et<sub>3</sub>N, silica gel flash chromatography: petroleum ether/ EtOAc/ Et<sub>3</sub>N = 60:1:1.2). R<sub>f</sub> = 0.20 (petroleum ether/EtOAc = 10:1).

**<sup>1</sup>H NMR** (400 MHz, CDCl<sub>3</sub>) δ 7.92 – 7.83 (m, 2H), 7.63 (d, *J* = 7.5 Hz, 2H), 7.57 (t, *J* = 7.4 Hz, 1H), 7.44 (t, *J* = 7.7 Hz, 2H), 7.35 (t, *J* = 7.5 Hz, 2H), 7.29 (dd, *J* = 6.4, 0.9 Hz, 1H), 7.04 (s, 1H), 7.00 (d, *J* = 8.9 Hz, 1H), 6.83 (d, *J* = 8.6 Hz, 1H), 5.31 (s, 1H), 4.39 (dd, *J* = 17.6, 1.8 Hz, 1H), 3.81 (s, 3H), 3.35 (d, *J* = 17.6 Hz, 1H).

**<sup>13</sup>C NMR** (100 MHz, CDCl<sub>3</sub>) δ 198 (d, *J* = 7.5 Hz), 153.6, 143.7 (dd, *J* = 9.0, 6.0 Hz), 137.5 (d, *J* = 5.0 Hz), 136.9, 133.6, 128.6, 128.2, 128.0, 127.7, 126.9 (d, *J* = 250 Hz), 126.6, 120.7 (dd, *J* = 26.0, 25.0 Hz), 120.5, 112.6, 108.4, 72.4 (dd, *J* = 28.0, 21.0 Hz), 56.0, 42.0 (dd, *J* = 9.0, 2.0 Hz).

**<sup>19</sup>F NMR** (376 MHz, CDCl<sub>3</sub>) δ -86.3 (d, *J* = 244.4 Hz), -107.6 (d, *J* = 248.2 Hz).

**HRMS** (ESI) *m/z* calcd. for C<sub>23</sub>H<sub>19</sub>F<sub>2</sub>NO<sub>2</sub> (M+H)<sup>+</sup>:380.1457, found 382.1453.

**Enantiomeric excess** is 94% determined by HPLC (Chiralpak AD-H, Hexane/Isopropanol 80/20, flow rate = 1.0 mL/min, 254 nm): major isomer: *tr* = 12.45 min; minor isomer: *tr* = 11.26 min.

[α]<sub>D</sub><sup>20</sup> = +160 (c = 0.2, CHCl<sub>3</sub>).

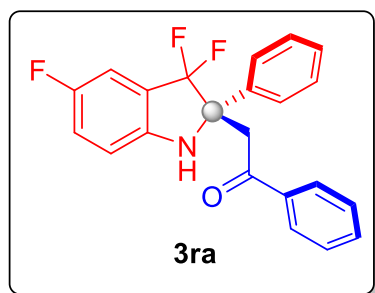

**(S)-1-phenyl-2-(3,3,5-trifluoro-2-phenylindolin-2-yl)ethan-1-one (3ra)** According to the general procedure, **3ra** was obtained using 3,3,5-trifluoro-2-phenyl-3H-indole **1r** (12.4 mg, 0.05 mmol) and acetophenone **2a** (60.0 mg, 0.5 mmol) in 87% yield (16.4 mg) and 92% ee as a white solid (silicone alkalized with Et<sub>3</sub>N, silica gel flash chromatography: petroleum ether/ EtOAc/ Et<sub>3</sub>N = 90:1:1). *R<sub>f</sub>* = 0.40 (petroleum ether/EtOAc = 10:1).

**<sup>1</sup>H NMR** (400 MHz, CDCl<sub>3</sub>) δ 7.92 – 7.83 (m, 2H), 7.62 (dd, *J* = 7.4, 1.7 Hz, 2H), 7.58 – 7.54 (m, 1H), 7.43 (t, *J* = 7.8 Hz, 2H), 7.39 – 7.32 (m, 2H), 7.32 – 7.26 (m, 1H), 7.19 (dd, *J* = 7.5, 1.4 Hz, 1H), 7.09 (t, *J* = 8.9 Hz, 1H), 6.85 – 6.73 (m, 1H), 5.81 (s, 1H), 4.40 (d, *J* = 17.7 Hz, 1H), 3.33 (d, *J* = 17.7 Hz, 1H).

**<sup>13</sup>C NMR** (100 MHz, CDCl<sub>3</sub>) δ 198.2 (d, *J* = 2.0 Hz), 156.5 (d, *J* = 237.0 Hz), 145.8 (t, *J* = 7.0 Hz), 137.0 (d, *J* = 5.0 Hz), 136.7, 133.7, 128.6, 128.3, 127.9, 127.8, 126.5, 126.2 (t, *J* = 250.0 Hz), 121.1

- 120.5 (m), 120.1 (d,  $J = 23.0$  Hz), 112.2 (d,  $J = 8.0$  Hz), 111.0 (d,  $J = 24.0$  Hz), 72.5 (dd,  $J = 27.0$ , 21.0 Hz), 41.8 (dd,  $J = 9.0$ , 2.0 Hz).

$^{19}\text{F}$  NMR (376 MHz,  $\text{CDCl}_3$ )  $\delta$  -86.1(d,  $J = 248.2$ , 7.5 Hz), -107.5(d,  $J = 248.2$ , 7.5 Hz), -124.30(d,  $J = 3.8$  Hz).

HRMS (ESI)  $m/z$  calcd. for  $\text{C}_{22}\text{H}_{16}\text{F}_3\text{NO}$  ( $\text{M}+\text{H}$ ) $^+$ :368.1257, found 368.1255.

Enantiomeric excess is 92% determined by HPLC (Chiralpak AD-H, Hexane/Isopropanol 80/20, flow rate = 1.0 mL/min, 254 nm): major isomer:  $t_r = 9.85$  min; minor isomer:  $t_r = 8.06$  min.

$[\alpha]_D^{20} = +251$  ( $c = 0.2$ ,  $\text{CHCl}_3$ ).

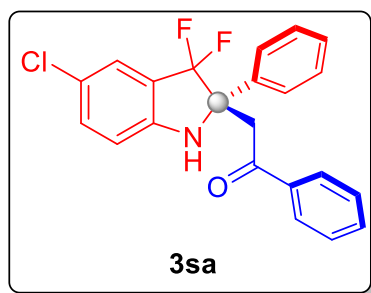

(S)-2-(5-chloro-3,3-difluoro-2-phenylindolin-2-yl)-1-phenylethan-1-one (**3sa**) According to the general procedure, **3sa** was obtained using 5-chloro-3,3-difluoro-2-phenyl-3H-indole **1s** (13.2 mg, 0.05 mmol) and acetophenone **2a** (60.0 mg, 0.5 mmol) in 89% yield (17.1 mg) and 92% ee as a white solid (silicone alkalinized with  $\text{Et}_3\text{N}$ , silica gel flash chromatography: petroleum ether/ EtOAc/  $\text{Et}_3\text{N} = 90:1:1$ ).  $R_f = 0.40$  (petroleum ether/EtOAc = 10:1).

$^1\text{H}$  NMR (400 MHz,  $\text{CDCl}_3$ )  $\delta$  7.88 (d,  $J = 7.8$  Hz, 2H), 7.58 (dd,  $J = 20.0$ , 7.5 Hz, 3H), 7.47 – 7.40 (m, 3H), 7.39 – 7.25 (m, 4H), 6.78 (d,  $J = 8.6$  Hz, 1H), 5.98 (s, 1H), 4.41 (d,  $J = 17.7$  Hz, 1H), 3.34 (d,  $J = 17.7$  Hz, 1H).

$^{13}\text{C}$  NMR (100 MHz,  $\text{CDCl}_3$ )  $\delta$  198.1 (d,  $J = 1.0$  Hz), 148.1 (dd,  $J = 8.0$ , 5.0 Hz), 136.9 (d,  $J = 5.0$  Hz), 136.7, 133.7, 133.0, 128.6, 128.3, 127.93, 127.85, 126.4, 125.9 (t,  $J = 250.0$  Hz), 124.3, 123.7 (t,  $J = 2.0$  Hz), 121.5 (t,  $J = 25.0$  Hz), 112.3, 72.3 (dd,  $J = 27.0$ , 21.0 Hz), 41.7 (dd,  $J = 9.0$ , 2.0 Hz).

$^{19}\text{F}$  NMR (376 MHz,  $\text{CDCl}_3$ )  $\delta$  -85.9 (d,  $J = 248.2$  Hz), -106.9 (d,  $J = 248.2$  Hz)

HRMS (ESI)  $m/z$  calcd. for  $\text{C}_{22}\text{H}_{16}\text{ClF}_2\text{NO}$  ( $\text{M}+\text{Na}$ ) $^+$ :406.0781, found 406.0784.

Enantiomeric excess is 92% determined by HPLC (Chiralpak AD-H, Hexane/Isopropanol 80/20, flow rate = 1.0 mL/min, 254 nm): major isomer:  $t_r = 10.595$  min; minor isomer:  $t_r = 8.62$  min.

$[\alpha]_D^{20} = +295$  ( $c = 0.2$ ,  $\text{CHCl}_3$ ).

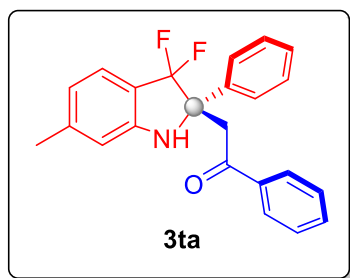

**(S)-2-(3,3-difluoro-6-methyl-2-phenylindolin-2-yl)-1-phenylethan-1-one (3ta)** According to the general procedure, **3ta** was obtained using 3,3-difluoro-6-methyl-2-phenyl-3H-indole **1d** (12.2 mg, 0.05 mmol) and acetophenone **2a** (60.0 mg, 0.5 mmol) in 82% yield (14.9 mg) and 82% ee as a white solid (silicone alkalized with  $\text{Et}_3\text{N}$ , silica gel flash chromatography: petroleum ether/ EtOAc/  $\text{Et}_3\text{N} = 90:1:1$ ).  $R_f = 0.40$  (petroleum ether/EtOAc = 10:1).

**$^1\text{H}$  NMR** (400 MHz,  $\text{CDCl}_3$ )  $\delta$  7.94 – 7.80 (m, 2H), 7.60 – 7.53 (m, 3H), 7.45 – 7.39 (m, 2H), 7.36 – 7.29 (m, 3H), 7.26 (d,  $J = 3.9$  Hz, 1H), 6.71 – 6.64 (m, 2H), 5.77 (s, 1H), 4.37 (dd,  $J = 17.8, 1.9$  Hz, 1H), 3.33 (dt,  $J = 17.9, 1.3$  Hz, 1H), 2.34 (s, 3H).

**$^{13}\text{C}$  NMR** (100 MHz,  $\text{CDCl}_3$ )  $\delta$  198.4, 149.9 (dd,  $J = 9.0, 7.0$  Hz), 143.7, 137.6 (d,  $J = 5.0$  Hz), 136.8, 133.6, 128.6, 128.2, 128.0, 127.7, 126.8 (t,  $J = 250.0$  Hz), 126.5, 124.1, 120.4, 117.4 (d,  $J = 5.0$  Hz), 111.7, 72.9 (dd,  $J = 28.0, 21.0$  Hz), 42.2 (dd,  $J = 9.0, 2.0$  Hz), 21.9.

**$^{19}\text{F}$  NMR** (376 MHz,  $\text{CDCl}_3$ )  $\delta$  -84.9 (d,  $J = 244.4$  Hz), -106.9 (d,  $J = 244.4$  Hz).

**HRMS** (ESI)  $m/z$  calcd. for  $\text{C}_{23}\text{H}_{19}\text{F}_2\text{NO}$  ( $\text{M}+\text{H}$ ) $^+$ :364.1507, found 364.1517.

**Enantiomeric excess** is 82% determined by HPLC (Chiralpak AD-H, Hexane/Isopropanol 80/20, flow rate = 1.0 mL/min, 254 nm): major isomer:  $t_r = 11.75$  min; minor isomer:  $t_r = 7.90$  min.

$[\alpha]_D^{20} = +122$  ( $c = 0.2$ ,  $\text{CHCl}_3$ ).

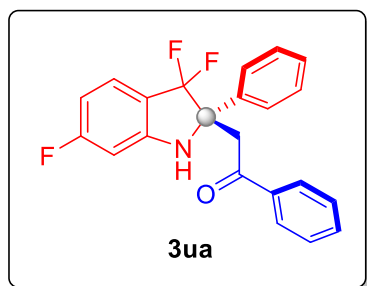

**(S)-1-phenyl-2-(3,3,6-trifluoro-2-phenylindolin-2-yl)ethan-1-one (3ua)** According to the general procedure, **3ua** was obtained using 3,3,6-trifluoro-2-phenyl-3H-indole **1u** (12.4 mg, 0.05 mmol) and acetophenone **2a** (60.0 mg, 0.5 mmol) in 90% yield (16.9 mg) and 90% ee as a white solid (silicone alkalized with Et<sub>3</sub>N, silica gel flash chromatography: petroleum ether/ EtOAc/ Et<sub>3</sub>N = 90:1:1). R<sub>f</sub> = 0.40 (petroleum ether/EtOAc = 10:1).

**<sup>1</sup>H NMR** (400 MHz, CDCl<sub>3</sub>) δ 7.81 – 7.76 (m, 2H), 7.49 – 7.45 (m, 3H), 7.36 – 7.29 (m, 3H), 7.24 (dd, *J* = 8.3, 6.5 Hz, 2H), 7.20 – 7.16 (m, 1H), 6.48 – 6.42 (m, 2H), 5.92 (s, 1H), 4.31 (dd, *J* = 17.9, 1.8 Hz, 1H), 3.24 (d, *J* = 17.9 Hz, 1H).

**<sup>13</sup>C NMR** (100 MHz, CDCl<sub>3</sub>) δ 198.2 (d, *J* = 2.0 Hz), 166.5 (d, *J* = 247.0 Hz), 151.4 (d, *J* = 7.0 Hz), 137.0 (d, *J* = 5.0 Hz), 136.7, 133.8, 128.7, 128.3, 128.0, 127.9, 126.4, 126.0 (d, *J* = 11.0 Hz), 125.9 (t, *J* = 248.0 Hz), 116.0 (t, *J* = 24.0 Hz), 106.5 (d, *J* = 24.0 Hz), 98.4 (d, *J* = 26.0 Hz), 72.5 (dd, *J* = 27.0, 21.0 Hz), 42.0 (dd, *J* = 9.0, 2.0 Hz).

**<sup>19</sup>F NMR** (376 MHz, CDCl<sub>3</sub>) δ -84.6 (d, *J* = 248.2, 3.8 Hz), -105.8 (d, *J* = 244.4, 3.8 Hz), -106.91.

**HRMS** (ESI) *m/z* calcd. for C<sub>22</sub>H<sub>16</sub>F<sub>3</sub>NO (M+H)<sup>+</sup>: 368.1257, found 368.1251.

**Enantiomeric excess** is 90% determined by HPLC (Chiralpak AD-H, Hexane/Isopropanol 80/20, flow rate = 1.0 mL/min, 254 nm): major isomer: tr = 10.19 min; minor isomer: tr = 9.00 min.

[α]<sub>D</sub><sup>20</sup> = 217 (c = 0.2, CHCl<sub>3</sub>).

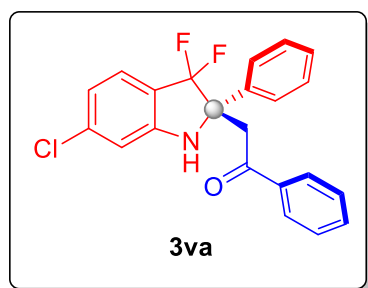

**(S)-2-(6-chloro-3,3-difluoro-2-phenylindolin-2-yl)-1-phenylethan-1-one (3va)** According to the general procedure, **3va** was obtained using 6-chloro-3,3-difluoro-2-phenyl-3H-indole **1v** (13.2 mg, 0.05 mmol) and acetophenone **2a** (60.0 mg, 0.5 mmol) in 84% yield (16.1 mg) and 80% ee as a white solid (silicone alkalized with Et<sub>3</sub>N, silica gel flash chromatography: petroleum ether/ EtOAc/ Et<sub>3</sub>N = 90:1:1). R<sub>f</sub> = 0.40 (petroleum ether/EtOAc = 10:1).

**<sup>1</sup>H NMR** (400 MHz, CDCl<sub>3</sub>) δ 7.87 (d, *J* = 7.3 Hz, 2H), 7.68 – 7.65 (m, 3H), 7.43 (t, *J* = 7.8 Hz, 2H), 7.35 (dd, *J* = 13.3, 8.0 Hz, 3H), 7.29 (d, *J* = 7.3 Hz, 1H), 6.83 (dd, *J* = 3.4, 1.7 Hz, 2H), 6.00 (s, 1H), 4.40 (d, *J* = 17.5 Hz, 1H), 3.32 (d, *J* = 17.8 Hz, 1H).

**<sup>13</sup>C NMR** (100 MHz, CDCl<sub>3</sub>) δ 198.1 (d, *J* = 2.0 Hz), 150.6 (dd, *J* = 7.0, 5.0 Hz), 139.0, 136.9 (d, *J* = 6.0 Hz), 136.7, 133.8, 128.7, 128.3, 128.0, 127.9, 126.4, 125.9 (t, *J* = 249.0 Hz), 125.4, 119.4, 118.6 (t, *J* = 26.0 Hz), 111.3, 72.2 (dd, *J* = 27.0, 22.0 Hz), 41.9 (dd, *J* = 10.0, 2.0 Hz).

**<sup>19</sup>F NMR** (376 MHz, CDCl<sub>3</sub>) δ -85.6 (d, *J* = 248.2 Hz), -106.4 (d, *J* = 248.2 Hz).

**HRMS** (ESI) *m/z* calcd. for C<sub>22</sub>H<sub>16</sub>ClF<sub>2</sub>NO (M+Na)<sup>+</sup>:406.0781, found 406.0778.

**Enantiomeric excess** is 80% determined by HPLC (Chiralpak AD-H, Hexane/Isopropanol 80/20, flow rate = 1.0 mL/min, 254 nm): major isomer: *tr* = 10.38 min; minor isomer: *tr* = 8.76 min.

[α]<sup>20</sup><sub>D</sub> = +261 (c = 0.2, CHCl<sub>3</sub>).

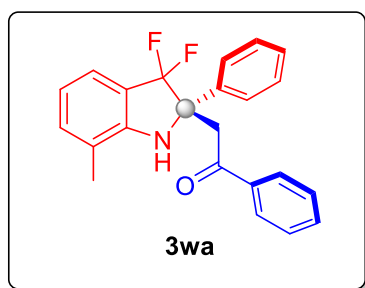

**(S)-2-(3,3-difluoro-7-methyl-2-phenylindolin-2-yl)-1-phenylethan-1-one (3wa)** According to the general procedure, **3wa** was obtained using 3,3-difluoro-7-methyl-2-phenyl-3H-indole **1w** (12.2 mg, 0.05 mmol) and acetophenone **2a** (60.0 mg, 0.5 mmol) in 87% yield (15.8 mg) and 20% ee as a white solid (silicone alkalized with Et<sub>3</sub>N, silica gel flash chromatography: petroleum ether/EtOAc/ Et<sub>3</sub>N = 80:1:1). *R<sub>f</sub>* = 0.30 (petroleum ether/EtOAc = 10:1).

**<sup>1</sup>H NMR** (400 MHz, CDCl<sub>3</sub>) δ 7.76 (d, *J* = 7.4 Hz, 2H), 7.53 (d, *J* = 8.2 Hz, 2H), 7.44 (t, *J* = 7.4 Hz, 1H), 7.31 (t, *J* = 7.7 Hz, 2H), 7.24 (t, *J* = 7.6 Hz, 3H), 7.18 – 7.14 (m, 1H), 7.09 (d, *J* = 7.5 Hz, 1H), 6.72 (t, *J* = 7.5 Hz, 1H), 5.67 (s, 1H), 4.29 (d, *J* = 17.7 Hz, 1H), 3.21 (d, *J* = 17.6 Hz, 1H), 2.18 (s, 3H).

**<sup>13</sup>C NMR** (100 MHz, CDCl<sub>3</sub>) δ 198.5, 148.3 (dd, *J* = 8.0, 6.0 Hz), 137.4 (d, *J* = 6.0 Hz), 136.8, 133.7, 133.5, 128.6, 128.2, 128.0, 127.7, 127.1 (dd, *J* = 250.0 Hz), 126.5, 121.6, 120.6, 119.6 – 119.1 (m), 119.4, 71.8 (dd, *J* = 28.0, 21.0 Hz), 42.1 (dd, *J* = 9.0, 2.0 Hz), 16.2.

**<sup>19</sup>F NMR** (376 MHz, CDCl<sub>3</sub>) δ -85.1 (d, *J* = 244.4 Hz), -106.8 (d, *J* = 248.2 Hz).

**HRMS** (ESI) *m/z* calcd. for C<sub>23</sub>H<sub>19</sub>F<sub>2</sub>NO (M+H)<sup>+</sup>:364.1507, found 364.1514.

**Enantiomeric excess** is 20% determined by HPLC (Chiralpak AD-H, Hexane/Isopropanol 80/20, flow rate = 1.0 mL/min, 254 nm): major isomer: *tr* = 9.42 min; minor isomer: *tr* = 8.58 min.

[α]<sub>D</sub><sup>20</sup> = +33 (c = 0.2, CHCl<sub>3</sub>).

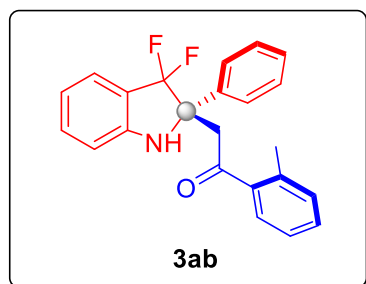

**(S)-2-(3,3-difluoro-2-phenylindolin-2-yl)-1-(o-tolyl)ethan-1-one (3ab)** According to the general procedure, **3ab** was obtained using 3,3-difluoro-2-phenyl-3H-indole **1a** (11.5 mg, 0.05 mmol) and 1-(o-tolyl)ethan-1-one **2b** (67.1 mg, 0.5 mmol) in 90% yield (16.4 mg) and 86% ee as a white solid (silicone alkalized with Et<sub>3</sub>N, silica gel flash chromatography: petroleum ether/ EtOAc/ Et<sub>3</sub>N = 90:1:1). *R<sub>f</sub>* = 0.40 (petroleum ether/EtOAc = 10:1).

**<sup>1</sup>H NMR** (400 MHz, CDCl<sub>3</sub>) δ 7.53 – 7.46 (m, 2H), 7.44 – 7.35 (m, 2H), 7.31 – 7.12 (m, 6H), 7.07 (d, *J* = 7.6 Hz, 1H), 6.86 – 6.75 (m, 2H), 6.07 – 5.75 (m, 1H), 4.16 (dd, *J* = 17.1, 2.0 Hz, 1H), 3.15 (d, *J* = 17.1 Hz, 1H), 2.04 (s, 3H).

**<sup>13</sup>C NMR** (100 MHz, CDCl<sub>3</sub>) δ 203.1, 149.5 (dd, *J* = 8.0, 5.0 Hz), 138.3, 137.9, 137.3 (d, *J* = 10.0 Hz), 133.0, 131.9, 131.6, 128.2, 128.0, 127.7, 126.7, 126.6 (t, *J* = 249.0 Hz), 125.7, 124.3, 120.2 (dd, *J* = 26.0, 25.0 Hz), 119.3, 111.4, 72.2 (dd, *J* = 27.0, 21.0 Hz), 44.8 (dd, *J* = 9.0, 2.0 Hz), 20.6.

**<sup>19</sup>F NMR** (376 MHz, CDCl<sub>3</sub>) δ -85.6(d, *J* = 248.2 Hz), -107.1 (d, *J* = 248.2 Hz).

**HRMS** (ESI) *m/z* calcd. for C<sub>23</sub>H<sub>19</sub>F<sub>2</sub>NO (M+H)<sup>+</sup>:364.1507, found 365.1549.

**Enantiomeric excess** is 86% determined by HPLC (Chiralpak AD-H, Hexane/Isopropanol 80/20, flow rate = 1.0 mL/min, 254 nm): major isomer: *tr* = 6.76 min; minor isomer: *tr* = 6.29 min.

[α]<sub>D</sub><sup>20</sup> = +98 (c = 0.2, CHCl<sub>3</sub>).

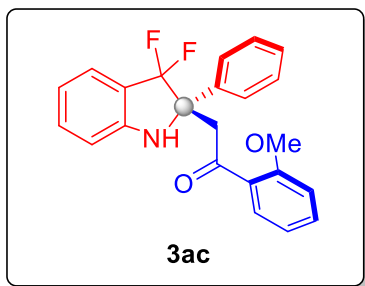

**(S)-2-(3,3-difluoro-2-phenylindolin-2-yl)-1-(2-methoxyphenyl)ethan-1-one (3ac)** According to the general procedure, **3ac** was obtained using 3,3-difluoro-2-phenyl-3H-indole **1a** (11.5 mg, 0.05 mmol) and 1-(2-methoxyphenyl)ethan-1-one **2c** (76.1 mg, 0.5 mmol) in 84% yield (15.9 mg) and 92% ee as a white solid (silicone alkalized with Et<sub>3</sub>N, silica gel flash chromatography: petroleum ether/ EtOAc/ Et<sub>3</sub>N = 70:1:1.5). *R<sub>f</sub>* = 0.30 (petroleum ether/EtOAc = 10:1).

**<sup>1</sup>H NMR** (400 MHz, CDCl<sub>3</sub>) δ 7.61 (d, *J* = 7.9 Hz, 2H), 7.48 – 7.40 (m, 3H), 7.37 – 7.32 (m, 3H), 7.30 – 7.26 (m, 1H), 6.97 – 6.90 (m, 2H), 6.90 – 6.84 (m, 2H), 5.91 (s, 1H), 4.46 (d, *J* = 18.2 Hz, 1H), 3.91 (s, 3H), 3.35 (d, *J* = 18.1 Hz, 1H).

**<sup>13</sup>C NMR** (100 MHz, CDCl<sub>3</sub>) δ 200.7 (d, *J* = 2.0 Hz), 158.6, 149.7 (dd, *J* = 13.0, 5.0 Hz), 137.7 (d, *J* = 5.0 Hz), 134.0, 132.9, 130.0, 128.1, 128.0, 127.5, 126.7, 126.7 (t, *J* = 249.0 Hz), 124.3, 120.6, 120.2 (t, *J* = 25.0 Hz), 119.0, 111.5, 111.2, 72.1 (dd, *J* = 27.0, 21.0 Hz), 55.5, 47.2 (d, *J* = 10.0, 2.0 Hz).

**<sup>19</sup>F NMR** (376 MHz, CDCl<sub>3</sub>) δ -84.9 (d, *J* = 248.2 Hz), -107.4 (d, *J* = 248.2 Hz).

**HRMS** (ESI) *m/z* calcd. for C<sub>23</sub>H<sub>19</sub>F<sub>2</sub>NO<sub>2</sub> (M+H)<sup>+</sup>:380.1457, found 380.1456.

**Enantiomeric excess** is 92% determined by HPLC (Chiralpak AD-H, Hexane/Isopropanol 80/20, flow rate = 0.5 mL/min, 254 nm): major isomer: *t<sub>r</sub>* = 21.02 min; minor isomer: *t<sub>r</sub>* = 23.67 min.

[α]<sub>D</sub><sup>20</sup> = +280 (c = 0.2, CHCl<sub>3</sub>).

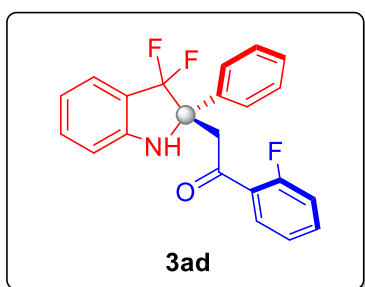

**(S)-2-(3,3-difluoro-2-phenylindolin-2-yl)-1-(2-fluorophenyl)ethan-1-one (3ad)** According to the



general procedure, **3ad** was obtained using 3,3-difluoro-2-phenyl-3H-indole **1a** (11.5 mg, 0.05 mmol) and 1-(2-fluorophenyl)ethan-1-one **2d** (69.1 mg, 0.5 mmol) in 92% yield (17.3 mg) and 96% ee as a white solid (silicone alkalized with Et<sub>3</sub>N, silica gel flash chromatography: petroleum ether/EtOAc/ Et<sub>3</sub>N = 90:1:1). R<sub>f</sub> = 0.40 (petroleum ether/EtOAc = 10:1).

<sup>1</sup>H NMR (400 MHz, CDCl<sub>3</sub>) δ 7.51 (td, *J* = 7.6, 1.8 Hz, 3H), 7.41 – 7.34 (m, 2H), 7.27 – 7.22 (m, 3H), 7.19 – 7.14 (m, 1H), 7.05 – 6.98 (m, 2H), 6.79 – 6.73 (m, 2H), 5.65 (s, 1H), 4.27 (d, *J* = 18.5 Hz, 1H), 3.31 (dd, *J* = 18.4, 1.4 Hz, 1H).

<sup>13</sup>C NMR (100 MHz, CDCl<sub>3</sub>) δ 196.8 (dd, *J* = 3.0, 1.0 Hz), 161.8 (d, *J* = 253.0 Hz), 149.6 (dd, *J* = 8.0, 6.0 Hz), 137.5 (d, *J* = 6.0 Hz), 135.1 (d, *J* = 9.0 Hz), 133.0, 130.3 (d, *J* = 3.0 Hz), 128.2, 127.7, 126.5, 126.5 (t, *J* = 249.0 Hz), 125.7 (d, *J* = 12.0 Hz), 124.5 (d, *J* = 3.0 Hz), 124.4, 120.1 (dd, *J* = 51.0, 25.0 Hz), 119.2, 116.7 (d, *J* = 24.0 Hz), 111.1, 71.8 (dd, *J* = 28.0, 21.0 Hz), 47.2 – 47.0 (m).

<sup>19</sup>F NMR (376 MHz, CDCl<sub>3</sub>) δ (d, *J* = 248.2, 3.8 Hz), -106.9 (d, *J* = 248.2 Hz), -108.5.

HRMS (ESI) *m/z* calcd. for C<sub>22</sub>H<sub>16</sub>F<sub>3</sub>NO (M+H)<sup>+</sup>:368.1257, found 368.1255.

Enantiomeric excess is 96% determined by HPLC (Chiralpak AD-H, Hexane/Isopropanol 80/20, flow rate = 0.5 mL/min, 254 nm): major isomer: tr = 12.84 min; minor isomer: tr = 12.06 min.

[α]<sub>D</sub><sup>20</sup> = +307 (c = 0.2, CHCl<sub>3</sub>).

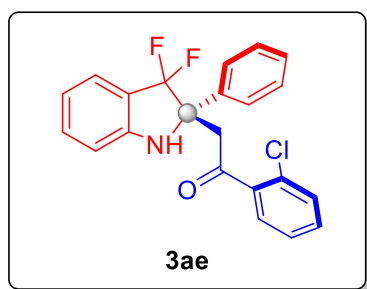

(S)-1-(2-chlorophenyl)-2-(3,3-difluoro-2-phenylindolin-2-yl)ethan-1-one (**3ae**) According to the general procedure, **3ae** was obtained using 3,3-difluoro-2-phenyl-3H-indole **1a** (11.5 mg, 0.05 mmol) and 1-(2-chlorophenyl)ethan-1-one **2e** (72.8 mg, 0.5 mmol) in 87% yield (11.4 mg) and 90% ee as a white solid (silicone alkalized with Et<sub>3</sub>N, silica gel flash chromatography: petroleum ether/EtOAc/ Et<sub>3</sub>N = 90:1:1). R<sub>f</sub> = 0.40 (petroleum ether/EtOAc = 10:1).

**<sup>1</sup>H NMR** (400 MHz, CDCl<sub>3</sub>) δ 7.50 – 7.43 (m, 2H), 7.36 (d, *J* = 7.6 Hz, 1H), 7.31 – 7.16 (m, 6H), 7.09 – 7.06 (m, 1H), 6.93 – 6.75 (m, 3H), 5.87 – 5.70 (m, 1H), 4.18 (dd, *J* = 16.9, 1.9 Hz, 1H), 3.20 (d, *J* = 16.9 Hz, 1H).

**<sup>13</sup>C NMR** (100 MHz, CDCl<sub>3</sub>) δ 202.3, 149.4 (dd, *J* = 8.0, 6.0 Hz), 139.4, 136.9 (d, *J* = 6.0 Hz), 133.1, 132.0, 130.6, 130.4, 128.6, 128.2, 127.9, 126.8, 126.7, 126.4 (t, *J* = 250.0 Hz), 124.3, 120.2 (dd, *J* = 26.0, 24.0 Hz), 119.5, 111.5, 72.2 (dd, *J* = 28.0, 22.0 Hz), 46.9 (dd, *J* = 10.0, 3.0 Hz).

**<sup>19</sup>F NMR** (376 MHz, CDCl<sub>3</sub>) δ -85.2 (d, *J* = 248.2 Hz), -107.0 (d, *J* = 248.2 Hz).

**HRMS** (ESI) *m/z* calcd. for C<sub>22</sub>H<sub>16</sub>ClF<sub>2</sub>NO (M+Na)<sup>+</sup>:406.0781, found 406.0773.

**Enantiomeric excess** is 90% determined by HPLC (Chiralpak AD-H, Hexane/Isopropanol 80/20, flow rate = 1.0 mL/min, 254 nm): major isomer: *tr* = 7.10 min; minor isomer: *tr* = 7.51 min.

[α]<sub>D</sub><sup>20</sup> = +194 (c = 0.2, CHCl<sub>3</sub>).

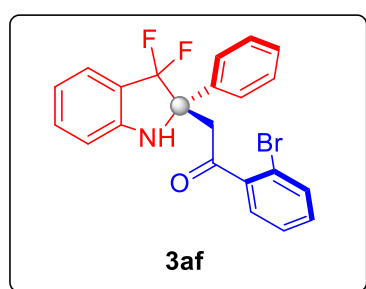

**(S)-1-(2-bromophenyl)-2-(3,3-difluoro-2-phenylindolin-2-yl)ethan-1-one (3af)** According to the general procedure, **3af** was obtained using 3,3-difluoro-2-phenyl-3H-indole **1a** (11.5 mg, 0.05 mmol) and 1-(2-bromophenyl)ethan-1-one **2f** (100 mg, 0.5 mmol) in 84% yield (18.0mg) and 94% ee as a white solid (silicone alkalinized with Et<sub>3</sub>N, silica gel flash chromatography: petroleum ether/ EtOAc/ Et<sub>3</sub>N = 90:1:1). *R<sub>f</sub>* = 0.40 (petroleum ether/EtOAc = 10:1).

**<sup>1</sup>H NMR** (400 MHz, CDCl<sub>3</sub>) δ 7.65 – 7.61 (m, 2H), 7.51 – 7.44 (m, 4H), 7.37 (d, *J* = 7.9 Hz, 1H), 7.29 – 7.22 (m, 3H), 7.20 – 7.16 (m, 1H), 6.84 – 6.73 (m, 2H), 5.65 (s, 1H), 4.24 (dd, *J* = 17.7, 1.8 Hz, 1H), 3.20 (dt, *J* = 17.7, 1.3 Hz, 1H).

**<sup>13</sup>C NMR** (100 MHz, CDCl<sub>3</sub>) δ 197.3 (d, *J* = 2.0 Hz), 149.5 (dd, *J* = 8.0, 6.0 Hz), 137.2 (d, *J* = 6.0 Hz), 135.5, 133.1, 132.0, 129.5, 129.0, 128.3, 127.8, 126.7 (d, *J* = 249.0 Hz), 126.4, 124.4, 120.0 (dd, *J* = 26.0, 25.0 Hz), 119.4, 111.2, 71.7 (dd, *J* = 28.0, 21.0 Hz), 42.0 (dd, *J* = 10.0, 2.0 Hz).

**<sup>19</sup>F NMR** (376 MHz, CDCl<sub>3</sub>) δ -85.5 (d, *J* = 248.2 Hz), -106.9 (d, *J* = 248.2 Hz).

**HRMS** (ESI)  $m/z$  calcd. for  $C_{22}H_{16}BrF_2NO$  ( $M+Na$ ) $^+$ :450.0276, found 450.0270.

**Enantiomeric excess** is 94% determined by HPLC (Chiralpak AD-H, Hexane/Isopropanol 80/20, flow rate = 1.0 mL/min, 254 nm): major isomer:  $t_r$  = 7.41 min; minor isomer:  $t_r$  = 8.01 min.

$[\alpha]_D^{20}$  = +114 ( $c$  = 0.2,  $CHCl_3$ ).

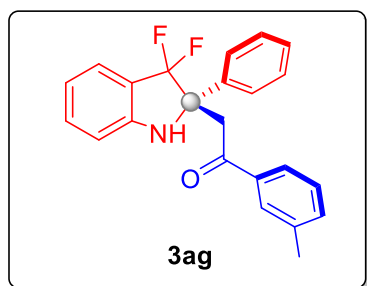

**(S)-2-(3,3-difluoro-2-phenylindolin-2-yl)-1-(m-tolyl)ethan-1-one (3ag)** According to the general procedure, **3ag** was obtained using 3,3-difluoro-2-phenyl-3H-indole **1a** (11.5 mg, 0.05 mmol) and 1-(m-tolyl)ethan-1-one **2g** (67.1 mg, 0.5 mmol) in 95% yield (17.3 mg) and 92% ee as a white solid (silicone alkalized with  $Et_3N$ , silica gel flash chromatography: petroleum ether/ EtOAc/  $Et_3N$  = 90:1:1).  $R_f$  = 0.40 (petroleum ether/EtOAc = 10:1).

**$^1H$  NMR** (400 MHz,  $CDCl_3$ )  $\delta$  7.68 (d,  $J$  = 7.2 Hz, 2H), 7.61 (d,  $J$  = 7.7 Hz, 2H), 7.47 (d,  $J$  = 7.7 Hz, 1H), 7.34 (m, 5H), 7.28 (dd,  $J$  = 7.3, 1.3 Hz, 1H), 6.90 – 6.81 (m, 2H), 5.89 (s, 1H), 4.38 (dt,  $J$  = 17.8, 1.9 Hz, 1H), 3.33 (dt,  $J$  = 17.9, 1.4 Hz, 1H), 2.38 (s, 3H).

**$^{13}C$  NMR** (100 MHz,  $CDCl_3$ )  $\delta$  198.5 (d,  $J$  = 2.0 Hz), 149.7 (dd,  $J$  = 7.0, 5.0 Hz), 138.5, 137.4 (d,  $J$  = 5.0 Hz), 136.9, 134.4, 133.0, 128.5, 128.5, 128.2, 127.7, 126.8 (t,  $J$  = 249.0 Hz), 126.5, 125.2, 124.3, 120.3 (t,  $J$  = 25.0 Hz), 119.2, 111.2, 71.8 (dd,  $J$  = 27.0, 21.0 Hz), 42.1 (dd,  $J$  = 9.0, 2.0 Hz), 21.26.

**$^{19}F$  NMR** (376 MHz,  $CDCl_3$ )  $\delta$  -84.97 – -85.65 (m), -107.02 – -107.70 (m).

**HRMS** (ESI)  $m/z$  calcd. for  $C_{23}H_{19}F_2NO$  ( $M+Na$ ) $^+$ :386.1327, found 386.1334.

**Enantiomeric excess** is 92% determined by HPLC (Chiralpak AD-H, Hexane/Isopropanol 80/20, flow rate = 0.5 mL/min, 254 nm): major isomer:  $t_r$  = 14.39 min; minor isomer:  $t_r$  = 12.4 min.

$[\alpha]_D^{20}$  = +342 ( $c$  = 0.2,  $CHCl_3$ ).

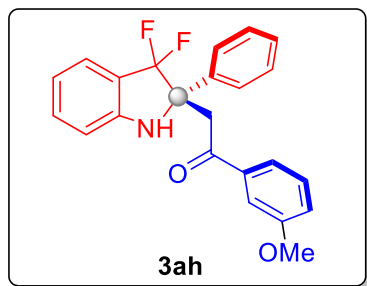

**(S)-2-(3,3-difluoro-2-phenylindolin-2-yl)-1-(3-methoxyphenyl)ethan-1-one (3ah)** According to the general procedure, **3ah** was obtained using 3,3-difluoro-2-phenyl-3H-indole **1a** (11.5 mg, 0.05 mmol) and 1-(3-methoxyphenyl)ethan-1-one **2h** (76.1 mg, 0.5 mmol) in 90% yield (17.1 mg) and 94% ee as a white solid (silicone alkalized with Et<sub>3</sub>N, silica gel flash chromatography: petroleum ether/ EtOAc/ Et<sub>3</sub>N = 70:1:1.5). R<sub>f</sub> = 0.30 (petroleum ether/EtOAc = 10:1).

**<sup>1</sup>H NMR** (400 MHz, CDCl<sub>3</sub>) δ 7.50 (d, *J* = 7.4 Hz, 2H), 7.39 – 7.35 (m, 2H), 7.27 – 7.21 (m, 5H), 7.19 – 7.15 (m, 1H), 7.01 – 6.98 (m, 1H), 6.80 – 6.74 (m, 2H), 5.75 (s, 1H), 4.27 (dd, *J* = 17.9, 1.8 Hz, 1H), 3.70 (s, 3H), 3.27 – 3.20 (m, 1H).

**<sup>13</sup>C NMR** (100 MHz, CDCl<sub>3</sub>) δ 198.1 (d, *J* = 2.0 Hz), 159.8, 149.6 (dd, *J* = 8.0, 5.0 Hz), 138.2, 137.4 (d, *J* = 6.0 Hz), 133.0, 129.6, 128.2, 127.7, 126.7 (t, *J* = 250.0 Hz), 126.5, 124.3, 120.6, 120.2, 120.1 (dd, *J* = 26.0, 25.0 Hz), 119.2, 112.1, 111.2, 71.8 (dd, *J* = 27.0, 21.0 Hz), 55.4, 42.2 (dd, *J* = 9.0, 2.0 Hz).

**<sup>19</sup>F NMR** (376 MHz, CDCl<sub>3</sub>) δ -85.3(d, *J* = 248.2 Hz), -107.3 (d, *J* = 244.4 Hz).

**HRMS** (ESI) *m/z* calcd. for C<sub>23</sub>H<sub>19</sub>F<sub>2</sub>NO<sub>2</sub> (M+Na)<sup>+</sup>:402.1276, found 402.1275.

**Enantiomeric excess** is 94% determined by HPLC (Chiralpak AD-H, Hexane/Isopropanol 80/20, flow rate = 0.5 mL/min, 254 nm): major isomer: tr = 17.96 min; minor isomer: tr = 14.26 min.

[α]<sub>D</sub><sup>20</sup> = +326 (c = 0.2, CHCl<sub>3</sub>).

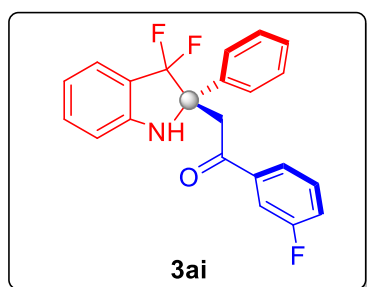

**(S)-2-(3,3-difluoro-2-phenylindolin-2-yl)-1-(3-fluorophenyl)ethan-1-one (3ai)** According to the

general procedure, **3ai** was obtained using 3,3-difluoro-2-phenyl-3H-indole **1a** (11.5 mg, 0.05 mmol) and 1-(3-fluorophenyl)ethan-1-one **2i** (69.1 mg, 0.5 mmol) in 93% yield (17.5 mg) and 96% ee as a white solid (silicone alkalized with Et<sub>3</sub>N, silica gel flash chromatography: petroleum ether/ EtOAc/ Et<sub>3</sub>N = 90:1:1). R<sub>f</sub> = 0.40 (petroleum ether/EtOAc = 10:1).

<sup>1</sup>H NMR (400 MHz, CDCl<sub>3</sub>) δ 7.54 (d, *J* = 7.8 Hz, 1H), 7.48 (d, *J* = 7.7 Hz, 2H), 7.41 (d, *J* = 9.3 Hz, 1H), 7.36 (d, *J* = 7.7 Hz, 1H), 7.31 – 7.21 (m, 4H), 7.20 – 7.12 (m, 2H), 6.76 (q, *J* = 7.5 Hz, 2H), 5.70 (s, 1H), 4.24 (dd, *J* = 17.8, 1.8 Hz, 1H), 3.22 (d, *J* = 17.8 Hz, 1H).

<sup>13</sup>C NMR (100 MHz, CDCl<sub>3</sub>) δ 197.1, 163.7 (d, *J* = 247.0 Hz), 149.5 (dd, *J* = 8.0, 6.0 Hz), 138.8 (d, *J* = 6.0 Hz), 137.2 (d, *J* = 6.0 Hz), 133.1, 130.3 (d, *J* = 8.0 Hz), 128.28, 127.8, 126.6 (t, *J* = 250.0 Hz), 126.5, 124.4, 123.8 (d, *J* = 3.0 Hz), 120.7 (d, *J* = 21.0 Hz), 120.0 (t, *J* = 25.0 Hz), 119.3, 114.7 (d, *J* = 23.0 Hz), 111.2, 71.7 (dd, *J* = 28.0, 21.0 Hz), 42.3 (dd, *J* = 10.0, 2.0 Hz).

<sup>19</sup>F NMR (376 MHz, CDCl<sub>3</sub>) δ -85.6 (d, *J* = 248.2 Hz), -106.8 (d, *J* = 248.2 Hz), -111.29.

HRMS (ESI) *m/z* calcd. for C<sub>22</sub>H<sub>16</sub>F<sub>3</sub>NO (M+Na)<sup>+</sup>: 368.1257, found 368.1264.

Enantiomeric excess is 96% determined by HPLC (Chiralpak AD-H, Hexane/Isopropanol 80/20, flow rate = 0.5 mL/min, 254 nm): major isomer: tr = 14.54 min; minor isomer: tr = 11.70 min.

[α]<sub>D</sub><sup>20</sup> = +366 (c = 0.2, CHCl<sub>3</sub>).

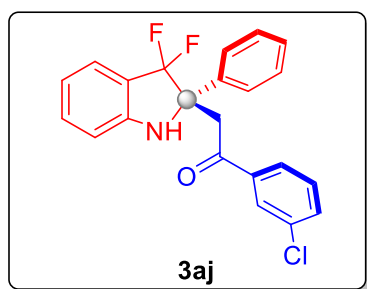

(*S*)-1-(3-chlorophenyl)-2-(3,3-difluoro-2-phenylindolin-2-yl)ethan-1-one (**3aj**) According to the general procedure, **3aj** was obtained using 3,3-difluoro-2-phenyl-3H-indole **1a** (11.5 mg, 0.05 mmol) and 1-(3-chlorophenyl)ethan-1-one **2j** (72.8 mg, 0.5 mmol) in 93% yield (17.8 mg) and 96% ee as a white solid (silicone alkalized with Et<sub>3</sub>N, silica gel flash chromatography: petroleum ether/ EtOAc/ Et<sub>3</sub>N = 90:1:1). R<sub>f</sub> = 0.40 (petroleum ether/EtOAc = 10:1).

<sup>1</sup>H NMR (400 MHz, CDCl<sub>3</sub>) δ 7.73 (t, *J* = 1.9 Hz, 1H), 7.66 (dt, *J* = 7.9, 1.4 Hz, 1H), 7.52 – 7.47 (m, 2H), 7.45 – 7.43 (m, 1H), 7.38 (d, *J* = 7.5 Hz, 1H), 7.31 – 7.24 (m, 4H), 7.21 – 7.18 (m, 1H),

6.83 – 6.75 (m, 2H), 5.69 (s, 1H), 4.25 (dd,  $J = 17.8, 1.8$  Hz, 1H), 3.24 (dt,  $J = 17.9, 1.3$  Hz, 1H).

$^{13}\text{C}$  NMR (100 MHz,  $\text{CDCl}_3$ )  $\delta$  197.1, 149.5 (dd,  $J = 8.0, 6.0$  Hz), 138.3, 137.2 (d,  $J = 6.0$  Hz), 135.0, 133.6, 133.1, 130.0, 128.3, 128.1, 127.8, 126.6 (t,  $J = 249.0$  Hz), 126.5, 126.1, 124.4, 120.0 (t,  $J = 26.0$  Hz), 119.4, 111.2, 71.7 (dd,  $J = 28.0, 22.0$  Hz), 42.3 (dd,  $J = 10.0, 2.0$  Hz).

$^{19}\text{F}$  NMR (376 MHz,  $\text{CDCl}_3$ )  $\delta$  -85.6 (d,  $J = 244.4$  Hz), -106.7 (d,  $J = 248.2$  Hz).

HRMS (ESI)  $m/z$  calcd. for  $\text{C}_{22}\text{H}_{16}\text{ClF}_2\text{NO}$  ( $\text{M}+\text{H}$ ) $^+$ :384.0961, found 384.0968.

Enantiomeric excess is 96% determined by HPLC (Chiralpak AD-H, Hexane/Isopropanol 80/20, flow rate = 0.5 mL/min, 254 nm): major isomer:  $t_r = 14.54$  min; minor isomer:  $t_r = 12.69$  min.

$[\alpha]_D^{20} = +226$  ( $c = 0.2, \text{CHCl}_3$ ).

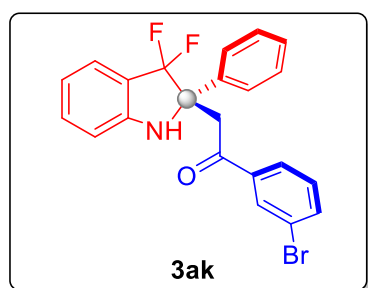

(S)-1-(3-bromophenyl)-2-(3,3-difluoro-2-phenylindolin-2-yl)ethan-1-one (**3ak**) According to the general procedure, **3ak** was obtained using 3,3-difluoro-2-phenyl-3H-indole **1a** (11.5 mg, 0.05 mmol) and 1-(3-bromophenyl)ethan-1-one **2k** (100 mg, 0.5 mmol) in 84% yield (18.0 mg) and 94% ee as a white solid (silicone alkalized with  $\text{Et}_3\text{N}$ , silica gel flash chromatography: petroleum ether/ $\text{EtOAc}$ / $\text{Et}_3\text{N} = 90:1:1$ ).  $R_f = 0.40$  (petroleum ether/ $\text{EtOAc} = 10:1$ ).

$^1\text{H}$  NMR (400 MHz,  $\text{CDCl}_3$ )  $\delta$  7.89 (t,  $J = 1.8$  Hz, 1H), 7.76 – 7.68 (m, 1H), 7.61 – 7.58 (m, 1H), 7.54 – 7.46 (m, 2H), 7.38 (d,  $J = 7.5$  Hz, 1H), 7.30 – 7.18 (m, 5H), 6.79 (td,  $J = 7.7, 6.3$  Hz, 2H), 5.68 (s, 1H), 4.24 (dd,  $J = 17.9, 1.8$  Hz, 1H), 3.24 (dt,  $J = 17.8, 1.3$  Hz, 1H).

$^{13}\text{C}$  NMR (100 MHz,  $\text{CDCl}_3$ )  $\delta$  197.0 (d,  $J = 1.0$  Hz), 149.5 – 149.4 (m), 138.5, 137.2 (d,  $J = 6.0$  Hz), 136.5, 133.1, 131.0, 130.2, 128.3, 127.8, 126.6 (t,  $J = 250.0$  Hz), 126.5, 126.5, 124.4, 123.0, 120.2 (t,  $J = 26.0$  Hz), 119.4, 111.2, 71.7 (dd,  $J = 28.0, 21.0$  Hz), 42.3 (dd,  $J = 9.0, 2.0$  Hz).

$^{19}\text{F}$  NMR (376 MHz,  $\text{CDCl}_3$ )  $\delta$  -85.3 – -86.0 (m), -106.5 – -107.2 (m).

HRMS (ESI)  $m/z$  calcd. for  $\text{C}_{22}\text{H}_{16}\text{BrF}_2\text{NO}$  ( $\text{M}+\text{H}$ ) $^+$ :428.0456, found 428.0453.

Enantiomeric excess is 94% determined by HPLC (Chiralpak AD-H, Hexane/Isopropanol 80/20,

flow rate = 0.5mL/min, 254 nm): major isomer: tr = 15.35 min; minor isomer: tr = 13.72 min.

$[\alpha]_D^{20} = +342$  (c = 0.2, CHCl<sub>3</sub>).

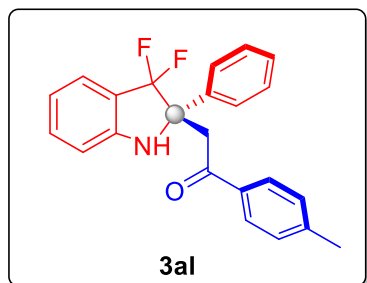

**(S)-2-(3,3-difluoro-2-phenylindolin-2-yl)-1-(p-tolyl)ethan-1-one (3al)** According to the general procedure, **3al** was obtained using 3,3-difluoro-2-phenyl-3H-indole **1a** (11.5 mg, 0.05 mmol) and 1-(p-tolyl)ethan-1-one **2l** (67.1 mg, 0.5 mmol) in 91% yield (16.5 mg) and 92% ee as a white solid (silicone alkalized with Et<sub>3</sub>N, silica gel flash chromatography: petroleum ether/ EtOAc/ Et<sub>3</sub>N = 90:1:1). R<sub>f</sub> = 0.40 (petroleum ether/EtOAc = 10:1).

**<sup>1</sup>H NMR** (400 MHz, CDCl<sub>3</sub>) δ 7.70 – 7.65 (m, 2H), 7.53 – 7.49 (m, 2H), 7.37 (d, *J* = 7.1 Hz, 1H), 7.24 (t, *J* = 7.8 Hz, 3H), 7.19 – 7.11 (m, 3H), 6.80 – 6.73 (m, 2H), 5.83 (s, 1H), 4.27 (dd, *J* = 17.7, 1.9 Hz, 1H), 3.20 (d, *J* = 17.7 Hz, 1H), 2.29 (s, 3H).

**<sup>13</sup>C NMR** (100 MHz, CDCl<sub>3</sub>) δ 197.9 (d, *J* = 1.0 Hz), 149.7 (dd, *J* = 8.0, 6.0 Hz), 144.6, 137.5 (d, *J* = 5.0 Hz), 134.4, 133.0, 129.3, 128.2, 128.1, 127.7, 126.8 (t, *J* = 250.0 Hz), 126.5, 124.3, 120.1 (dd, *J* = 26.0, 25.0 Hz), 119.2, 111.2, 71.9 (dd, *J* = 27.0, 21.0 Hz), 41.8 (dd, *J* = 9.0, 2.0 Hz), 21.6.

**<sup>19</sup>F NMR** (376 MHz, CDCl<sub>3</sub>) δ -85.1 (d, *J* = 248.2 Hz), -107.5 (d, *J* = 244.4 Hz).

**HRMS** (ESI) *m/z* calcd. for C<sub>23</sub>H<sub>19</sub>F<sub>2</sub>NO (M+H)<sup>+</sup>:364.1507, found 364.1510.

**Enantiomeric excess** is 92% determined by HPLC (Chiralpak AD-H, Hexane/Isopropanol 80/20, flow rate = 1.0 mL/min, 254 nm): major isomer: tr = 12.12 min; minor isomer: tr = 8.56 min.

$[\alpha]_D^{20} = +280$  (c = 0.2, CHCl<sub>3</sub>).

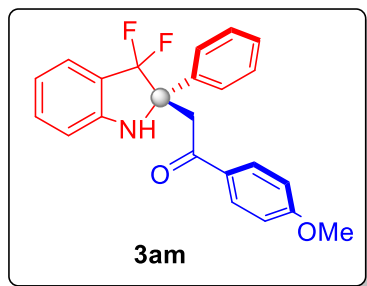

**(S)-2-(3,3-difluoro-2-phenylindolin-2-yl)-1-(4-methoxyphenyl)ethan-1-one (3am)** According to the general procedure, **3am** was obtained using 3,3-difluoro-2-phenyl-3H-indole **1a** (11.5 mg, 0.05 mmol) and 1-(4-methoxyphenyl)ethan-1-one **2m** (76.1mg, 0.5 mmol) in 90% yield (17.1 mg) and 90% ee as a white solid (silicone alkalized with Et<sub>3</sub>N, silica gel flash chromatography: petroleum ether/ EtOAc/ Et<sub>3</sub>N = 60:1:1.5). R<sub>f</sub> = 0.20 (petroleum ether/EtOAc = 10:1).

**<sup>1</sup>H NMR** (400 MHz, CDCl<sub>3</sub>) δ 7.72 – 7.66 (m, 2H), 7.49 (d, *J* = 7.9 Hz, 2H), 7.33 (d, *J* = 7.1 Hz, 1H), 7.22 – 7.15 (m, 3H), 7.13 – 7.07 (m, 1H), 6.72 (dd, *J* = 11.5, 8.0 Hz, 4H), 5.85 (s, 1H), 4.25 – 4.15 (m, 1H), 3.63 (s, 3H), 3.11 (dd, *J* = 17.9, 3.7 Hz, 1H).

**<sup>13</sup>C NMR** (100 MHz, CDCl<sub>3</sub>) δ 196.6, 163.8, 149.7 – 149.6 (m), 137.5 (d, *J* = 5.0 Hz), 132.9, 130.3, 129.3, 128.1, 127.6, 126.8 (t, *J* = 250.0 Hz), 126.5, 124.2, 120.0 (t, *J* = 25.0 Hz), 119.1, 113.7, 111.2, 71.8 (dd, *J* = 28.0, 21.0 Hz), 55.3, 41.4 – 41.3 (m).

**<sup>19</sup>F NMR** (376 MHz, CDCl<sub>3</sub>) δ 84.6(d, *J* = 248.2 Hz), -107.6 (d, *J* = 248.2 Hz).

**HRMS** (ESI) *m/z* calcd. for C<sub>23</sub>H<sub>19</sub>F<sub>2</sub>NO<sub>2</sub> (M+Na)<sup>+</sup>:402.1276, found 402.1280.

**Enantiomeric excess** is 90% determined by HPLC (Chiralpak AD-H, Hexane/Isopropanol 80/20, flow rate = 1.0 mL/min, 254 nm): major isomer: tr = 23.84 min; minor isomer: tr = 13.08 min.

[α]<sub>D</sub><sup>20</sup> = +331 (c = 0.2, CHCl<sub>3</sub>).

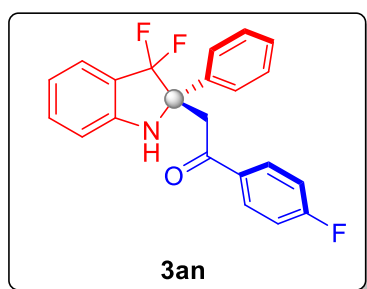

**(S)-2-(3,3-difluoro-2-phenylindolin-2-yl)-1-(4-fluorophenyl)ethan-1-one (3an)** According to the general procedure, **3an** was obtained using 3,3-difluoro-2-phenyl-3H-indole **1a** (11.5 mg, 0.05



mmol) and 1-(47-fluorophenyl)ethan-1-one **2n** (69.1 mg, 0.5 mmol) in 98% yield (18.4 mg) and 94% ee as a white solid (silicone alkalized with Et<sub>3</sub>N, silica gel flash chromatography: petroleum ether/EtOAc/ Et<sub>3</sub>N = 90:1:1). R<sub>f</sub> = 0.40 (petroleum ether/EtOAc = 10:1).

<sup>1</sup>H NMR (400 MHz, CDCl<sub>3</sub>) δ 7.89 (dd, *J* = 8.7, 5.5 Hz, 2H), 7.59 (dd, *J* = 7.5, 2.3 Hz, 2H), 7.47 (d, *J* = 7.6 Hz, 1H), 7.39 – 7.27 (m, 4H), 7.09 (t, *J* = 8.5 Hz, 2H), 6.91 – 6.84 (m, 2H), 5.85 (s, 1H), 4.35 (d, *J* = 17.8 Hz, 1H), 3.31 (d, *J* = 17.7 Hz, 1H).

<sup>13</sup>C NMR (100 MHz, CDCl<sub>3</sub>) δ 196.7 (d, *J* = 2.0 Hz), 166.0 (d, *J* = 255.0 Hz), 149.6 (d, *J* = 8.0, 6.0 Hz), 137.3 (d, *J* = 5.0 Hz), 133.2 (d, *J* = 3.0 Hz), 133.0, 130.7 (d, *J* = 10.0 Hz), 128.3, 127.8, 126.7 (t, *J* = 249.0 Hz), 126.5, 124.3, 120.0 (t, *J* = 25.0 Hz), 119.3, 115.9, 115.7, 111.2, 71.8 (dd, *J* = 28.0, 21.0 Hz), 42.0 (dd, *J* = 10.0, 3.0 Hz).

<sup>19</sup>F NMR (376 MHz, CDCl<sub>3</sub>) δ -85.4 (d, *J* = 248.2 Hz), -103.8, -107.0 (d, *J* = 248.2 Hz).

HRMS (ESI) *m/z* calcd. for C<sub>22</sub>H<sub>16</sub>F<sub>3</sub>NO (M+H)<sup>+</sup>:368.1257, found 368.1248.

Enantiomeric excess is 94% determined by HPLC (Chiralpak AD-H, Hexane/Isopropanol 80/20, flow rate = 1.0 mL/min, 254 nm): major isomer: tr = 13.03 min; minor isomer: tr = 9.18 min.

[α]<sub>D</sub><sup>20</sup> = +250 (c = 0.2, CHCl<sub>3</sub>).

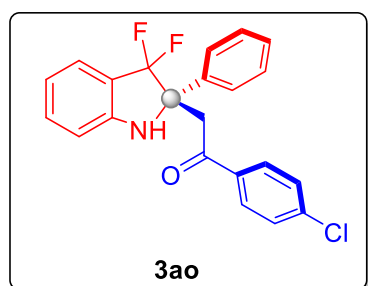

(S)-1-(4-chlorophenyl)-2-(3,3-difluoro-2-phenylindolin-2-yl)ethan-1-one (**3ao**) According to the general procedure, **3ao** was obtained using 3,3-difluoro-2-phenyl-3H-indole **1a** (11.5 mg, 0.05 mmol) and 1-(4-chlorophenyl)ethan-1-one **2o** (72.8 mg, 0.5 mmol) in 92% yield (17.7 mg) and 94% ee as a white solid (silicone alkalized with Et<sub>3</sub>N, silica gel flash chromatography: petroleum ether/EtOAc/ Et<sub>3</sub>N = 90:1:1). R<sub>f</sub> = 0.40 (petroleum ether/EtOAc = 10:1).

<sup>1</sup>H NMR (400 MHz, CDCl<sub>3</sub>) δ 7.83 – 7.77 (m, 2H), 7.59 (d, *J* = 7.7 Hz, 2H), 7.54 – 7.43 (m, 2H), 7.40 – 7.37 (m, 2H), 7.34 (t, *J* = 7.9 Hz, 2H), 7.30 – 7.25 (m, 1H), 6.94 – 6.81 (m, 2H), 5.83 (s, 1H), 4.34 (d, *J* = 17.5 Hz, 1H), 3.30 (d, *J* = 17.7 Hz, 1H).

$^{13}\text{C}$  NMR (100 MHz,  $\text{CDCl}_3$ )  $\delta$  197.1 (d,  $J = 2.0$  Hz), 149.5 (dd,  $J = 8.0, 6.0$  Hz), 140.2, 137.2 (d,  $J = 6$  Hz), 135.1, 133.0, 129.4, 128.9, 128.3, 127.8, 126.7 (t,  $J = 250.0$  Hz), 126.4, 124.3, 120.0 (t,  $J = 25.0$  Hz), 119.3, 111.2, 71.7 (dd,  $J = 28.0, 22.0$  Hz), 42.0 (dd,  $J = 9.0, 2.0$  Hz).

$^{19}\text{F}$  NMR (376 MHz,  $\text{CDCl}_3$ )  $\delta$  -85.5 (d,  $J = 248.2$  Hz), -106.9 (d,  $J = 244.4$  Hz).

HRMS (ESI)  $m/z$  calcd. for  $\text{C}_{22}\text{H}_{16}\text{ClF}_2\text{NO}$  ( $\text{M}+\text{H}$ ) $^+$ :384.0961, found 384.0968.

Enantiomeric excess is 94% determined by HPLC (Chiralpak AD-H, Hexane/Isopropanol 80/20, flow rate = 1.0 mL/min, 254 nm): major isomer:  $t_r = 15.17$  min; minor isomer:  $t_r = 10.71$  min.

$[\alpha]_D^{20} = +321$  ( $c = 0.2, \text{CHCl}_3$ ).

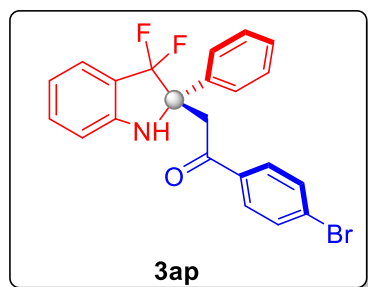

(*S*)-1-(4-bromophenyl)-2-(3,3-difluoro-2-phenylindolin-2-yl)ethan-1-one (**3ap**) According to the general procedure, **3ap** was obtained using 3,3-difluoro-2-phenyl-3H-indole **1a** (11.5 mg, 0.05 mmol) and 1-(4-bromophenyl)ethan-1-one **2p** (100 mg, 0.5 mmol) in 90% yield (15.6 mg) and 92% ee as a white solid (silicone alkalized with  $\text{Et}_3\text{N}$ , silica gel flash chromatography: petroleum ether/EtOAc/  $\text{Et}_3\text{N} = 90:1:1$ ).  $R_f = 0.40$  (petroleum ether/EtOAc = 10:1).

$^1\text{H}$  NMR (400 MHz,  $\text{CDCl}_3$ )  $\delta$  7.63 (d,  $J = 8.6$  Hz, 2H), 7.52 – 7.43 (m, 4H), 7.37 (d,  $J = 7.5$  Hz, 1H), 7.29 – 7.16 (m, 4H), 6.84 – 6.68 (m, 2H), 5.72 (s, 1H), 4.24 (dd,  $J = 17.7, 1.8$  Hz, 1H), 3.20 (d,  $J = 17.7$  Hz, 1H).

$^{13}\text{C}$  NMR (100 MHz,  $\text{CDCl}_3$ )  $\delta$  197.3 (d,  $J = 1$  Hz), 149.5 (dd,  $J = 8.0, 6.0$  Hz), 137.2 (d,  $J = 5$  Hz), 135.5, 133.1, 132.0, 129.5, 129.0, 128.3, 127.8, 126.6 (t,  $J = 249.0$  Hz), 126.4, 124.4, 120.0 (t,  $J = 25.0$  Hz), 119.3, 111.2, 71.7 (dd,  $J = 28.0, 22.0$  Hz), 42.0 (dd,  $J = 10.0, 5.0$  Hz).

$^{19}\text{F}$  NMR (376 MHz,  $\text{CDCl}_3$ )  $\delta$  -85.5 (d,  $J = 248.2$  Hz), -107.0 (d,  $J = 244.4$  Hz).

HRMS (ESI)  $m/z$  calcd. for  $\text{C}_{22}\text{H}_{16}\text{BrF}_2\text{NO}$  ( $\text{M}+\text{Na}$ ) $^+$ :450.0276, found 450.0284.

Enantiomeric excess is 92% determined by HPLC (Chiralpak AD-H, Hexane/Isopropanol 80/20, flow rate = 0.5 mL/min, 254 nm): major isomer:  $t_r = 23.33$  min; minor isomer:  $t_r = 16.98$  min.

$[\alpha]_D^{20} = +67$  (c = 0.2, CHCl<sub>3</sub>).

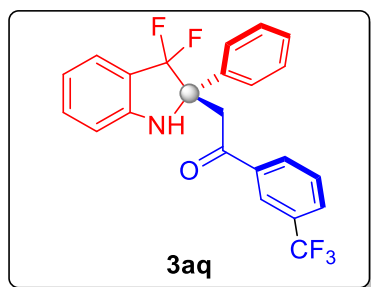

**(S)-2-(3,3-difluoro-2-phenylindolin-2-yl)-1-(3-(trifluoromethyl)phenyl)ethan-1-one (3aq)**

According to the general procedure, **3aq** was obtained using 3,3-difluoro-2-phenyl-3H-indole **1a** (11.5 mg, 0.05 mmol) and 1-(3-(trifluoromethyl)phenyl)ethan-1-one **2q** (94.1 mg, 0.5 mmol) in 90% yield (18.8 mg) and 92% ee as a white solid (silicone alkalized with Et<sub>3</sub>N, silica gel flash chromatography: petroleum ether/ EtOAc/ Et<sub>3</sub>N = 90:1:1).  $R_f = 0.40$  (petroleum ether/EtOAc = 10:1).

**<sup>1</sup>H NMR** (400 MHz, CDCl<sub>3</sub>)  $\delta$  8.01 (s, 1H), 7.96 (d,  $J = 8.1$  Hz, 1H), 7.73 (d,  $J = 7.6$  Hz, 1H), 7.53 – 7.46 (m, 3H), 7.39 (d,  $J = 7.6$  Hz, 1H), 7.31 – 7.23 (m, 3H), 7.21 – 7.18 (m, 1H), 6.86 – 6.75 (m, 2H), 5.66 (s, 1H), 4.29 (dd,  $J = 17.7, 1.8$  Hz, 1H), 3.29 (d,  $J = 17.7$  Hz, 1H).

**<sup>13</sup>C NMR** (100 MHz, CDCl<sub>3</sub>)  $\delta$  197.1, 149.4 (dd,  $J = 8.0, 6.0$  Hz), 137.1 (d,  $J = 6$  Hz), 137.1, 133.1, 131.3 (d,  $J = 33$  Hz), 131.1, 130.0 (q,  $J = 4.0$  Hz), 129.4, 129.1, 128.3, 127.9, 126.6 (t,  $J = 250.0$  Hz), 126.4, 124.8 (q,  $J = 4.0$  Hz), 124.4, 120.0 (t,  $J = 25.0$  Hz), 119.5, 111.2, 71.7 (dd,  $J = 28.0, 21.0$  Hz), 42.5 (dd,  $J = 9.0, 2.0$  Hz).

**<sup>19</sup>F NMR** (376 MHz, CDCl<sub>3</sub>)  $\delta$  -62.85, -85.6 (d,  $J = 248.2$  Hz), -106.8 (d,  $J = 248.2$  Hz).

**HRMS** (ESI)  $m/z$  calcd. for C<sub>22</sub>H<sub>16</sub>F<sub>5</sub>NO (M+H)<sup>+</sup>: 418.1225, found 418.1226.

**Enantiomeric excess** is 92% determined by HPLC (Chiralpak AD-H, Hexane/Isopropanol 80/20, flow rate = 1.0 mL/min, 254 nm): major isomer:  $t_r = 6.45$  min; minor isomer:  $t_r = 5.97$  min.

$[\alpha]_D^{20} = +291$  (c = 0.2, CHCl<sub>3</sub>).

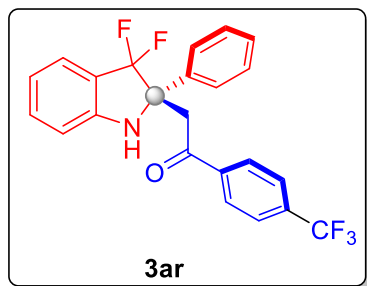

**(S)-2-(3,3-difluoro-2-phenylindolin-2-yl)-1-(3-(trifluoromethyl)phenyl)ethan-1-one (3ar)**

According to the general procedure, **3ar** was obtained using 3,3-difluoro-2-phenyl-3H-indole **1a** (11.5 mg, 0.05 mmol) and 1-(4-(trifluoromethyl)phenyl)ethan-1-one **2r** (94.1 mg, 0.5 mmol) in 90% yield (18.8 mg) and 96% ee as a white solid (silicone alkalized with Et<sub>3</sub>N, silica gel flash chromatography: petroleum ether/ EtOAc/ Et<sub>3</sub>N = 90:1:1). *R<sub>f</sub>* = 0.40 (petroleum ether/EtOAc = 10:1).

**<sup>1</sup>H NMR** (400 MHz, CDCl<sub>3</sub>) δ 7.86 (d, *J* = 8.1 Hz, 2H), 7.59 (d, *J* = 8.2 Hz, 2H), 7.48 (d, *J* = 7.6 Hz, 2H), 7.38 (d, *J* = 7.6 Hz, 1H), 7.26 (dt, *J* = 11.7, 7.8 Hz, 3H), 7.20 – 7.16 (m, 1H), 6.84 – 6.74 (m, 2H), 5.69 (s, 1H), 4.29 (dd, *J* = 17.9, 1.7 Hz, 1H), 3.28 (d, *J* = 17.8 Hz, 1H).

**<sup>13</sup>C NMR** (100 MHz, CDCl<sub>3</sub>) δ 197.5, 149.5 (dd, *J* = 8.0, 6.0 Hz), 139.4, 137.1 (d, *J* = 5.0 Hz), 134.8 (d, *J* = 33.0 Hz), 133.1, 128.3, 128.3, 127.9, 126.6 (t, *J* = 250.0 Hz), 126.4, 125.7 (q, *J* = 4.0 Hz), 124.4, 123.4 (d, *J* = 272.0 Hz), 120.0 (t, *J* = 25.0 Hz), 119.4, 111.2, 71.7 (dd, *J* = 27.0, 21.0 Hz), 42.6 (dd, *J* = 9.0, 2.0 Hz).

**<sup>19</sup>F NMR** (376 MHz, CDCl<sub>3</sub>) δ -63.18, -85.8 (d, *J* = 248.2 Hz), -106.5 (d, *J* = 248.2 Hz).

**HRMS** (ESI) *m/z* calcd. for C<sub>23</sub>H<sub>16</sub>F<sub>5</sub>NO (M+H)<sup>+</sup>:418.1225, found 418.1224.

**Enantiomeric excess** is 96% determined by HPLC (Chiralpak AD-H, Hexane/Isopropanol 80/20, flow rate = 1.0 mL/min, 254 nm): major isomer: *t<sub>r</sub>* = 12.76 min; minor isomer: *t<sub>r</sub>* = 10.25 min.

[α]<sub>D</sub><sup>20</sup> = +231 (*c* = 0.2, CHCl<sub>3</sub>).

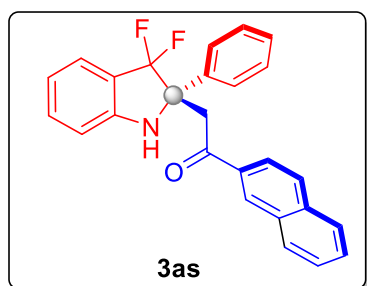

**(S)-2-(3,3-difluoro-2-phenylindolin-2-yl)-1-(naphthalen-2-yl)ethan-1-one (3as)** According to the general procedure, **3as** was obtained using 3,3-difluoro-2-phenyl-3H-indole **1a** (11.5 mg, 0.05 mmol) and 1-(naphthalen-2-yl)ethan-1-one **2s** (85.1 mg, 0.5 mmol) in 87% yield (17.4 mg) and 90% ee as a white solid (silicone alkalized with Et<sub>3</sub>N, silica gel flash chromatography: petroleum ether/EtOAc/ Et<sub>3</sub>N = 90:1:1). R<sub>f</sub> = 0.40 (petroleum ether/EtOAc = 10:1).

**<sup>1</sup>H NMR** (400 MHz, CDCl<sub>3</sub>) δ 8.44 (s, 1H), 7.96 (d, *J* = 7.9 Hz, 1H), 7.92 – 7.90 (m, 1.8 Hz, 1H), 7.89 – 7.83 (m, 2H), 7.66 (d, *J* = 7.3 Hz, 2H), 7.63 – 7.55 (m, 2H), 7.52 (d, *J* = 7.5 Hz, 1H), 7.41 – 7.34 (m, 3H), 7.29 (d, *J* = 7.4 Hz, 1H), 6.91 (t, *J* = 7.6 Hz, 2H), 5.96 (s, 1H), 4.57 (d, *J* = 17.4 Hz, 1H), 3.48 (d, *J* = 17.7 Hz, 1H).

**<sup>13</sup>C NMR** (100 MHz, CDCl<sub>3</sub>) δ 198.2, 149.7 (dd, *J* = 7.0, 5.0 Hz), 137.4 (d, *J* = 5.0 Hz), 135.7, 134.2, 133.0, 132.3, 130.0, 129.6, 128.8, 128.7 – 127.8 (m), 128.5, 128.3 (t, *J* = 50.0 Hz), 128.3, 127.7, 126.8 (t, *J* = 199.0 Hz), 126.5, 124.4, 123.3, 120.1 (t, *J* = 26.0 Hz), 119.3, 111.3, 71.9 (dd, *J* = 27.0, 21.0 Hz), 42.0 (dd, *J* = 9.0, 2.0 Hz).

**<sup>19</sup>F NMR** (376 MHz, CDCl<sub>3</sub>) δ -85.2 (d, *J* = 244.4 Hz), -107.2 (d, *J* = 248.2 Hz).

**HRMS** (ESI) *m/z* calcd. for C<sub>26</sub>H<sub>19</sub>F<sub>2</sub>NO (M+Na)<sup>+</sup>: 422.1327, found 422.1322.

**Enantiomeric excess** is 90% determined by HPLC (Chiralpak AD-H, Hexane/Isopropanol 80/20, flow rate = 0.5 mL/min, 254 nm): major isomer: tr = 31.00 min; minor isomer: tr = 19.67 min.

[α]<sub>D</sub><sup>20</sup> = +335 (c = 0.2, CHCl<sub>3</sub>).

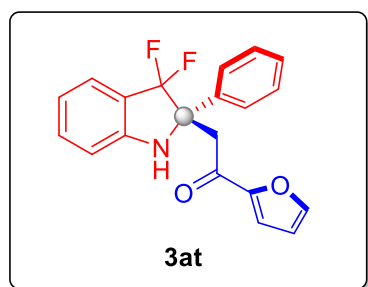

**(S)-2-(3,3-difluoro-2-phenylindolin-2-yl)-1-(furan-2-yl)ethan-1-one (3at)** According to the general procedure, **3at** was obtained using 3,3-difluoro-2-phenyl-3H-indole **1a** (11.5 mg, 0.05 mmol) and 1-(furan-2-yl)ethan-1-one **2t** (55.1 mg, 0.5 mmol) in 90% yield (15.3 mg) and 70% ee as a white solid (silicone alkalized with Et<sub>3</sub>N, silica gel flash chromatography: petroleum ether/ EtOAc/ Et<sub>3</sub>N = 90:1:1). R<sub>f</sub> = 0.40 (petroleum ether/EtOAc = 10:1).

**<sup>1</sup>H NMR** (400 MHz, CDCl<sub>3</sub>) δ 7.63 (d, *J* = 8.0 Hz, 2H), 7.55 – 7.51 (m, 1H), 7.48 (d, *J* = 7.6 Hz, 1H), 7.39 – 7.32 (m, 3H), 7.29 – 7.24 (m, 1H), 7.13 (d, *J* = 3.6 Hz, 1H), 6.90 – 6.87 (m, 2H), 6.46 (dd, *J* = 3.6, 1.7 Hz, 1H), 5.95 (s, 1H), 4.26 (dd, *J* = 17.1, 2.0 Hz, 1H), 3.10 (d, *J* = 17.0 Hz, 1H).

**<sup>13</sup>C NMR** (100 MHz, CDCl<sub>3</sub>) δ 187.1 (d, *J* = 2.0 Hz), 152.5, 149.5 (dd, *J* = 8.0, 5.0 Hz), 149.4, 146.9, 136.9 (d, *J* = 5.0 Hz), 133.0, 128.2, 127.8, 126.6, 126.6 (t, *J* = 250.0 Hz), 126.6, 124.2, 120.1 (dd, *J* = 26.0, 24.0 Hz), 119.3, 118.1, 112.5, 111.5, 71.9 (dd, *J* = 28.0, 21.0 Hz), 41.7 (dd, *J* = 9.0, 2.0 Hz).

**<sup>19</sup>F NMR** (376 MHz, CDCl<sub>3</sub>) δ -84.7 (dd, *J* = 248.2, 7.5 Hz), -107.9 (d, *J* = 244.4, 3.8 Hz).

**HRMS** (ESI) *m/z* calcd. for C<sub>20</sub>H<sub>15</sub>F<sub>2</sub>NO<sub>2</sub> (M+H)<sup>+</sup>:340.1144, found 340.1136.

**Enantiomeric excess** is 70% determined by HPLC (Chiralpak AD-H, Hexane/Isopropanol 80/20, flow rate = 0.5 mL/min, 254 nm): major isomer: *tr* = 22.69 min; minor isomer: *tr* = 16.97 min.

[α]<sub>D</sub><sup>20</sup> = +234 (c = 0.2, CHCl<sub>3</sub>).

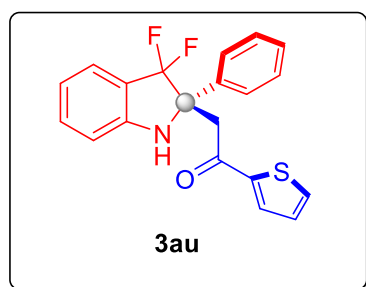

**(S)-2-(3,3-difluoro-2-phenylindolin-2-yl)-1-(thiophen-2-yl)ethan-1-one (3au)** According to the general procedure, **3au** was obtained using 3,3-difluoro-2-phenyl-3H-indole **1a** (11.5 mg, 0.05 mmol) and 1-(thiophen-2-yl)ethan-1-one **2u** (63.1 mg, 0.5 mmol) in 89% yield (15.8 mg) and 86% ee as a white solid (silicone alkalized with Et<sub>3</sub>N, silica gel flash chromatography: petroleum ether/EtOAc/ Et<sub>3</sub>N = 90:1:1). *R<sub>f</sub>* = 0.40 (petroleum ether/EtOAc = 10:1).

**<sup>1</sup>H NMR** (400 MHz, CDCl<sub>3</sub>) δ 7.70 (dd, *J* = 3.9, 1.1 Hz, 1H), 7.65 – 7.59 (m, 3H), 7.47 (d, *J* = 7.3 Hz, 1H), 7.39 – 7.32 (m, 3H), 7.30 – 7.25 (m, 1H), 7.08 (dd, *J* = 4.9, 3.8 Hz, 1H), 6.91 – 6.86 (m, 2H), 5.96 (s, 1H), 4.26 (dd, *J* = 17.1, 1.9 Hz, 1H), 3.24 (d, *J* = 17.2, 1H).

**<sup>13</sup>C NMR** (100 MHz, CDCl<sub>3</sub>) δ 191.0 (d, *J* = 2.0 Hz), 149.5 (dd, *J* = 8.0, 6.0 Hz), 144.1, 137.0 (d, *J* = 6.0 Hz), 134.7, 133.0 (d, *J* = 1.0 Hz), 132.6, 128.23, 128.22, 127.8, 126.6 (t, *J* = 250.0 Hz),

126.5, 124.3, 120.1 (dd,  $J = 26.0, 25.0$  Hz), 119.8, 119.3, 111.5, 72.9 (dd,  $J = 28.0, 22.0$  Hz), 42.7 (dd,  $J = 10.0, 2.0$  Hz).

$^{19}\text{F}$  NMR (376 MHz,  $\text{CDCl}_3$ )  $\delta$  -84.6 (d,  $J = 244.4$  Hz), -107.8 (d,  $J = 248.2$  Hz).

HRMS (ESI)  $m/z$  calcd. for  $\text{C}_{20}\text{H}_{15}\text{F}_2\text{NOS}$  ( $\text{M}+\text{H}$ ) $^+$ :356.0915, found 356.0916.

Enantiomeric excess is 86% determined by HPLC (Chiralpak AD-H, Hexane/Isopropanol 80/20, flow rate = 1.0 mL/min, 254 nm): major isomer:  $t_r = 13.65$  min; minor isomer:  $t_r = 9.19$  min.

$[\alpha]_D^{20} = +228$  ( $c = 0.2, \text{CHCl}_3$ ).

#### 4. Synthesis applications of **3aa**

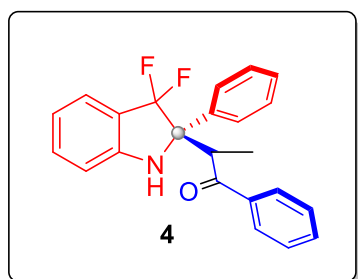

**(S)-2-((S)-3,3-difluoro-2-phenylindolin-2-yl)-1-phenylpropan-1-one (4)**. Dissolve (**3aa**) (17.5 mg, 0.05 mmol) and NaH (1.9 mg, 0.08 mmol) in DMF at 0 ° C, stir for 30 minutes, and then react overnight with MeI (42.6 mg, 0.08 mmol) at room temperature. Then the reaction was quenched with water, followed by extraction using ethyl acetate (10 mL  $\times$  3), dried over  $\text{Na}_2\text{SO}_4$ , filtered, and concentrated under reduced pressure. The residue was purified by column chromatography (silicone alkalinized with  $\text{Et}_3\text{N}$ , silica gel flash chromatography: petroleum ether/ EtOAc/  $\text{Et}_3\text{N} = 90:1:1$ ) to afford **4** (15.26 mg, 84%, 94% ee) as white solid.  $R_f = 0.50$  (petroleum ether/EtOAc = 10:1).

$^1\text{H}$  NMR (400 MHz,  $\text{CDCl}_3$ )  $\delta$  7.77 – 7.73 (m, 2H), 7.59 (d,  $J = 7.5$  Hz, 2H), 7.52 – 7.48 (m, 1H), 7.43 (d,  $J = 7.5$  Hz, 1H), 7.39 – 7.33 (m, 3H), 7.22 (t,  $J = 7.6$  Hz, 2H), 7.15 – 7.10 (m, 1H), 6.90 (d,  $J = 8.1$  Hz, 1H), 6.84 (t,  $J = 7.4$  Hz, 1H), 6.06 (s, 1H), 4.75 (q,  $J = 6.9$  Hz, 1H), 1.15 (d,  $J = 6.9$  Hz, 3H).

$^{13}\text{C}$  NMR (100 MHz,  $\text{CDCl}_3$ )  $\delta$  204.3 (d,  $J = 2.0$  Hz), 151.0 (dd,  $J = 8.0, 5.0$  Hz), 138.4 (d,  $J = 7.0$  Hz), 136.09, 133.4, 133.2 (d,  $J = 2.0$  Hz), 128.6, 128.04, 127.95, 127.5, 126.8 (t,  $J = 249.0$  Hz), 126.5, 123.5, 121.2 (t,  $J = 25.0$  Hz), 118.8, 110.1, 74.1 (dd,  $J = 27.0, 21.0$  Hz), 46.1 (dd,  $J = 7.0, 2.0$  Hz), 14.7 (d,  $J = 3.0$  Hz).

$^{19}\text{F}$  NMR (376 MHz,  $\text{CDCl}_3$ )  $\delta$  -71.6 (d,  $J = 251.9$  Hz), -107.6 (d,  $J = 255.7$  Hz).

**HRMS** (ESI)  $m/z$  calcd. for  $C_{23}H_{19}F_2NO$  ( $M+H$ ) $^+$ :364.1507, found 364.1499.

**Enantiomeric excess** is 94% determined by HPLC (Chiralpak AD-H, Hexane/Isopropanol 80/20, flow rate = 1.0 mL/min, 254 nm): major isomer:  $t_r$  = 7.35 min; minor isomer:  $t_r$  = 5.10 min.

$[\alpha]_D^{20} = +272$  ( $c = 0.2$ ,  $CHCl_3$ ).

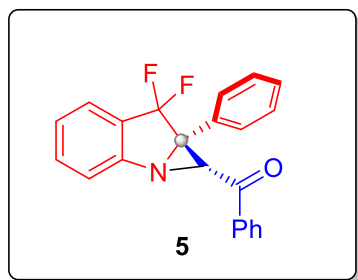

**((1R,7aR)-7,7-difluoro-7a-phenyl-7,7a-dihydro-1H-azirino[1,2-a]indol-1-**

**yl)(phenyl)methanone (5)** A mixture of **3aa** (34.9 mg, 0.1 mmol),  $I_2$  (50.8 mg, 0.2 mmol), and DBU (30.4 mg, 0.2 mmol) was stirred in 2.0 mL of THF at 40 °C for react overnight until the disappearance of **3aa** as determined by TLC. The reaction mixture was quenched with aqueous  $Na_2S_2O_3$  and extracted with  $CH_2Cl_2$  (15 mL  $\times$  3). The organic extracts were dried over  $Na_2SO_4$ , filtered, and concentrated to give a residue, which was purified by column chromatography on silica gel (silicone alkalized with  $Et_3N$ , silica gel flash chromatography: petroleum ether/ EtOAc/  $Et_3N$  = 90:1:1) to afford the product **5** (30.2 mg, 87%, 94% ee).  $R_f$  = 0.30 (petroleum ether/EtOAc = 10:1)  
 **$^1H$  NMR** (400 MHz,  $CDCl_3$ )  $\delta$  7.83 – 7.76 (m, 2H), 7.47 (t,  $J$  = 8.8 Hz, 2H), 7.43 – 7.33 (m, 4H), 7.30 – 7.24 (m, 2H), 7.19 (t,  $J$  = 7.5 Hz, 1H), 7.12 (dd,  $J$  = 5.1, 2.0 Hz, 3H), 3.75 (d,  $J$  = 1.4 Hz, 1H).

**$^{13}C$  NMR** (100 MHz,  $CDCl_3$ )  $\delta$  188.6, 155.8 (t,  $J$  = 8.0 Hz), 135.3, 133.7, 132.7, 129.3 (dd,  $J$  = 29.0, 25.0 Hz), 128.6, 128.6, 128.3, 128.0, 127.8 (d,  $J$  = 2.0 Hz), 126.6, 126.4 (t,  $J$  = 247.0 Hz), 125.0, 120.8, 65.4, 59.5 (dd,  $J$  = 33.0, 26.0 Hz).

**$^{19}F$  NMR** (376 MHz,  $CDCl_3$ )  $\delta$  -84.1 (d,  $J$  = 259.4 Hz), -88.2 (d,  $J$  = 259.4 Hz).

**HRMS** (ESI)  $m/z$  calcd. for  $C_{22}H_{15}F_2NO$  ( $M+H$ ) $^+$ :348.1194, found 348.1184.

**Enantiomeric excess** is 94% determined by HPLC (Chiralpak AD-H, Hexane/Isopropanol 80/20, flow rate = 1.0 mL/min, 254 nm): major isomer:  $t_r$  = 9.89 min; minor isomer:  $t_r$  = 7.22 min.

$[\alpha]_D^{20} = +214$  ( $c = 0.2$ ,  $CHCl_3$ ).



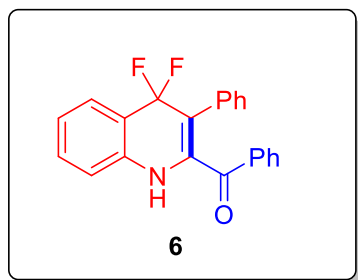

**(4,4-difluoro-3-phenyl-1,4-dihydroquinolin-2-yl)(phenyl)methanone (6)** A mixture of **5** (17.4 mg, 0.05 mmol),  $K_2CO_3$  (1.4 mg, 20 mmol%), was stirred in DMSO of 0.5 mL at 120 °C for react overnight until the disappearance of **5** as determined by TLC. Then the reaction was quenched with water, followed by extraction using ethyl acetate (10 mL  $\times$  3), dried over  $Na_2SO_4$ , filtered, and concentrated under reduced pressure. The residue was purified by column chromatography (silicone alkalized with  $Et_3N$ , silica gel flash chromatography: petroleum ether/ EtOAc/  $Et_3N$  = 90:1:1) to afford **6** (14.9 mg, 86%) as white solid.  $R_f$  = 0.50 (petroleum ether/EtOAc = 10:1).

**$^1H$  NMR** (400 MHz,  $CDCl_3$ )  $\delta$  8.12 – 8.09 (m, 2H), 7.78 – 7.72 (m, 3H), 7.64 – 7.59 (m, 1H), 7.47 – 7.42 (m, 1H), 7.36 – 7.19 (m, 8H).

**$^{13}C$  NMR** (100 MHz,  $CDCl_3$ )  $\delta$  193.8 (d,  $J$  = 4.0 Hz), 163.25, 160.58, 158.1 (d,  $J$  = 3.0 Hz), 148.0 (d,  $J$  = 6 Hz), 135.78, 133.66, 131.01, 130.64, 130.30, 130.0 (d,  $J$  = 1 Hz), 129.5 (d,  $J$  = 3.0 Hz), 128.39, 128.36, 128.2 (d,  $J$  = 2.0 Hz), 120.7 (d,  $J$  = 6.0 Hz), 119.3 (d,  $J$  = 2.0 Hz), 119.1 (d,  $J$  = 5.0 Hz).

**$^{19}F$  NMR** (376 MHz,  $CDCl_3$ )  $\delta$  -115.46.

**HRMS** (ESI)  $m/z$  calcd. for  $C_{22}H_{15}F_2NO$  ( $M+Na$ ) $^+$ :370.1014, found 370.1015.

## 5. Crystal of **3aa**

Crystal data for **3aa**:  $C_{22}H_{17}F_2NO$ ,  $M$  = 349.36,  $a$  = 9.5585(4) Å,  $b$  = 7.8842(3) Å,  $c$  = 11.8135(5) Å,  $\alpha$  = 90°,  $\beta$  = 107.2350(10)°,  $\gamma$  = 90°,  $V$  = 850.30(6) Å<sup>3</sup>,  $T$  = 150.(2) K, space group  $P1211$ ,  $Z$  = 2,  $\mu$ (Cu  $K\alpha$ ) = 0.814 mm<sup>-1</sup>, 17617 reflections measured, 3037 independent reflections ( $R_{int}$  = 0.0493). The final  $R_I$  values were 0.0347 ( $I > 2\sigma(I)$ ). The final  $wR(F^2)$  values were 0.0933 ( $I > 2\sigma(I)$ ). The final  $R_I$  values were 0.0358 (all data). The final  $wR(F^2)$  values were 0.0958 (all data). The goodness of fit on  $F^2$  was 1.080. Flack parameter = 0.00(7).

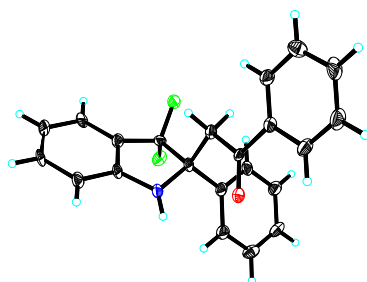

View of a molecule of **3aa**.

Displacement ellipsoids are drawn at the 30% probability level.

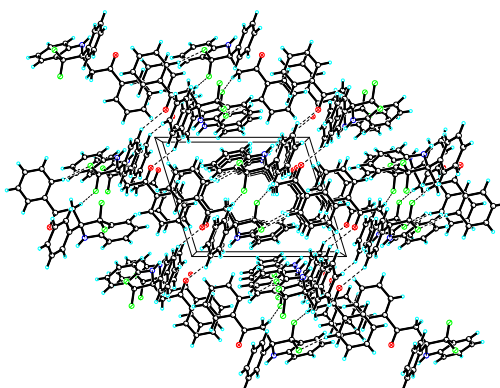

View of the pack drawing of **3aa**.

Hydrogen-bonds are shown as dashed lines.

| Table 1. Crystal data and structure refinement for <b>3aa</b> . |                                                    |          |
|-----------------------------------------------------------------|----------------------------------------------------|----------|
| Identification code                                             | global                                             |          |
| Empirical formula                                               | C <sub>22</sub> H <sub>17</sub> F <sub>2</sub> N O |          |
| Formula weight                                                  | 349.36                                             |          |
| Temperature                                                     | 150(2) K                                           |          |
| Wavelength                                                      | 1.54178 Å                                          |          |
| Crystal system                                                  | Monoclinic                                         |          |
| Space group                                                     | P 1 21 1                                           |          |
| Unit cell dimensions                                            | a = 9.5585(4) Å                                    | α = 90°. |
|                                                                 | b = 7.8842(3) Å                                    | β =      |
|                                                                 | 107.2350(10)°.                                     |          |

|                                   |                                             |                       |
|-----------------------------------|---------------------------------------------|-----------------------|
|                                   | $c = 11.8135(5) \text{ \AA}$                | $\gamma = 90^\circ$ . |
| Volume                            | 850.30(6) $\text{\AA}^3$                    |                       |
| Z                                 | 2                                           |                       |
| Density (calculated)              | 1.365 $\text{Mg/m}^3$                       |                       |
| Absorption coefficient            | 0.814 $\text{mm}^{-1}$                      |                       |
| F(000)                            | 364                                         |                       |
| Crystal size                      | 0.300 x 0.200 x 0.100 $\text{mm}^3$         |                       |
| Theta range for data collection   | 3.92 to 68.48°.                             |                       |
| Index ranges                      | -11 ≤ h ≤ 11, -8 ≤ k ≤ 9, -14 ≤ l ≤ 14      |                       |
| Reflections collected             | 17617                                       |                       |
| Independent reflections           | 3037 [R(int) = 0.0493]                      |                       |
| Completeness to theta = 68.48°    | 99.9 %                                      |                       |
| Absorption correction             | Semi-empirical from equivalents             |                       |
| Max. and min. transmission        | 0.92 and 0.78                               |                       |
| Refinement method                 | Full-matrix least-squares on F <sup>2</sup> |                       |
| Data / restraints / parameters    | 3037 / 1 / 235                              |                       |
| Goodness-of-fit on F <sup>2</sup> | 1.080                                       |                       |
| Final R indices [I > 2σ(I)]       | R1 = 0.0347, wR2 = 0.0933                   |                       |
| R indices (all data)              | R1 = 0.0358, wR2 = 0.0958                   |                       |
| Absolute structure parameter      | 0.00(7)                                     |                       |
| Largest diff. peak and hole       | 0.403 and -0.284 $\text{e.\AA}^{-3}$        |                       |

## 6. References

- 1, R. Lin, S. Ding, Z. Shi, N. Jiao, *Org. Lett.*, **2011**, *13*, 4498-4501
- 2, Y.-L. Liu, X.-Y. Mao, X.-T. Lin, G.-S. Chen, *Org. Chem. Front.*, **2018**, *5*, 2303-2307
- 3, L. Yang, Y. Ma, F. Song, J. You, *Chem. Commun.*, **2014**, *50*, 3024-3026.
- 4, A. Arcadi, E. Pietropaolo, A. Alvino, V. Michelet, *Org. Lett.*, **2013**, *15*, 2766-2769.
- 5, T. Ma, X.-P. Wei, X.-C. Wang, X.-X. Qiao, G. Li, Y. He, X.-J. Zhao, *Org. Lett.*, **2023**, *25*, 8666-8671.

## 7. Copies of HPLC

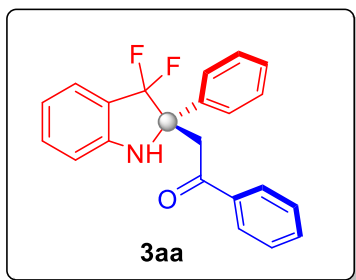

**Enantiomeric excess** is 94% determined by HPLC (Chiralpak AD-H, Hexane/Isopropanol 80/20, flow rate = 1.0 mL/min, 254 nm): major isomer: tr = 11.04 min; minor isomer: tr = 8.47 min.

$[\alpha]_D^{20} = +389$  (c = 0.35, CHCl<sub>3</sub>).

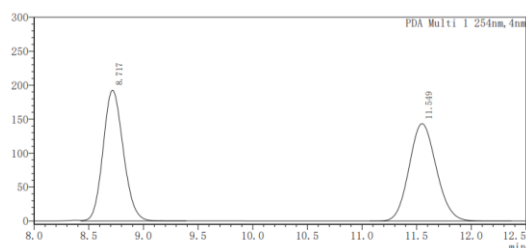

<Signal>

PDA Ch1 254nm

| Peak   | RetTime | Area    | Height | Area%   |
|--------|---------|---------|--------|---------|
| 1      | 8.717   | 2482236 | 192728 | 49.951  |
| 2      | 11.549  | 2487096 | 143552 | 50.049  |
| Totals |         | 4969332 | 336280 | 100.000 |

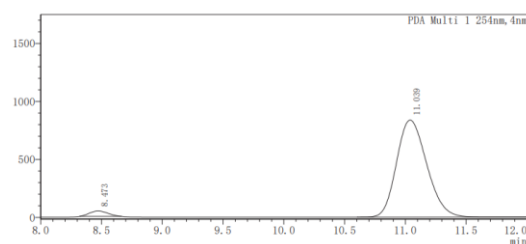

<Signal>

PDA Ch1 254nm

| Peak   | RetTime | Area     | Height | Area%   |
|--------|---------|----------|--------|---------|
| 1      | 8.473   | 487609   | 46067  | 3.263   |
| 2      | 11.039  | 14456424 | 837254 | 96.737  |
| Totals |         | 14944033 | 883321 | 100.000 |

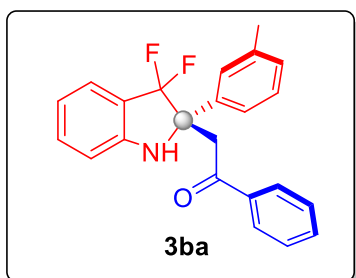

**Enantiomeric excess** is 92% determined by HPLC (Chiralpak AD-H, Hexane/Isopropanol 80/20, flow rate = 1.0 mL/min, 254 nm): major isomer: tr = 16.40 min; minor isomer: tr = 11.81 min.

$[\alpha]_D^{20} = +182$  (c = 0.3, CHCl<sub>3</sub>).

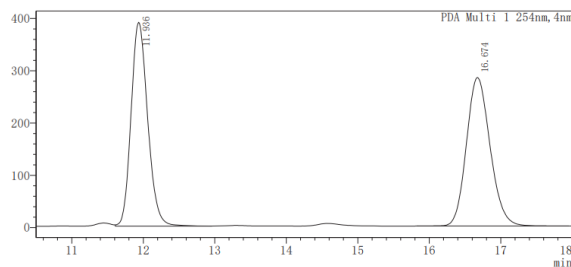

<Signal>

PDA Ch1 254nm

| Peak   | RetTime | Area     | Height | Area%   |
|--------|---------|----------|--------|---------|
| 1      | 11.936  | 6290762  | 389735 | 49.039  |
| 2      | 16.674  | 6537246  | 284042 | 50.961  |
| Totals |         | 12828008 | 673778 | 100.000 |

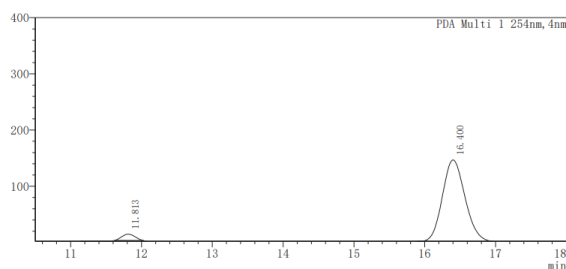

<Signal>

| Peak   | RetTime | Area    | Height | Area%   |
|--------|---------|---------|--------|---------|
| 1      | 11.813  | 141553  | 11125  | 4.051   |
| 2      | 16.400  | 3352895 | 146574 | 95.949  |
| Totals |         | 3494448 | 157699 | 100.000 |

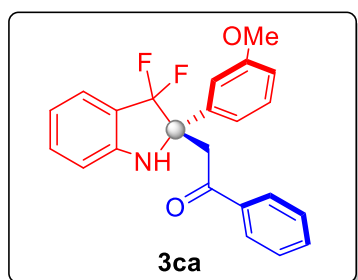

**Enantiomeric excess** is 90% determined by HPLC (Chiralpak AD-H, Hexane/Isopropanol 80/20, flow rate = 1.0 mL/min, 254 nm): major isomer: tr = 13.37 min; minor isomer: tr = 10.58 min.

$[\alpha]_D^{20} = +178$  (c = 0.2, CHCl<sub>3</sub>).

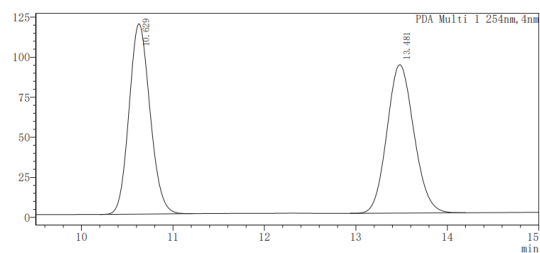

<Signal>

| Peak   | RetTime | Area    | Height | Area%   |
|--------|---------|---------|--------|---------|
| 1      | 10.629  | 1891841 | 118726 | 49.857  |
| 2      | 13.481  | 1902728 | 92675  | 50.143  |
| Totals |         | 3794569 | 211402 | 100.000 |

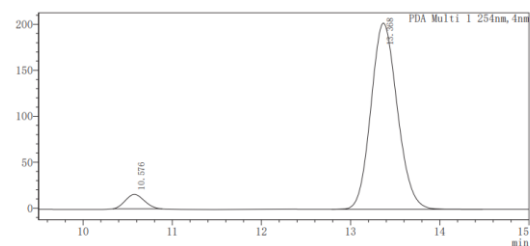

<Signal>

| Peak   | RetTime | Area    | Height | Area%   |
|--------|---------|---------|--------|---------|
| 1      | 10.576  | 231176  | 15622  | 5.255   |
| 2      | 13.368  | 4167584 | 202538 | 94.745  |
| Totals |         | 4398760 | 218160 | 100.000 |

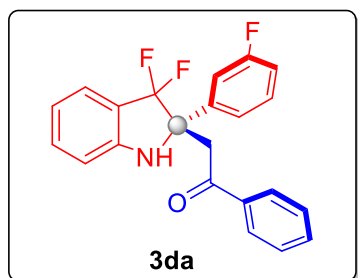

**Enantiomeric excess** is 88% determined by HPLC (Chiralpak AD-H, Hexane/Isopropanol 80/20, flow rate = 1.0 mL/min, 254 nm): major isomer: tr = 13.31 min; minor isomer: tr = 10.59 min.

$[\alpha]_D^{20} = +280$  ( $c = 0.2$ ,  $\text{CHCl}_3$ ).

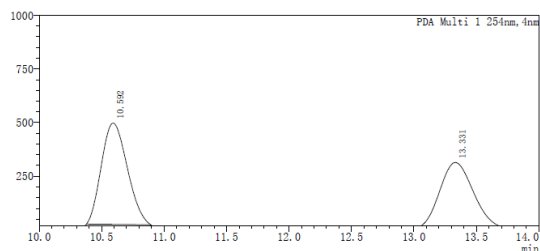

<Signal>

PDA Ch1 254nm

| Peak   | RetTime | Area     | Height | Area%   |
|--------|---------|----------|--------|---------|
| 1      | 10.592  | 6776913  | 472189 | 52.785  |
| 2      | 13.331  | 6061814  | 313531 | 47.215  |
| Totals |         | 12838727 | 785719 | 100.000 |

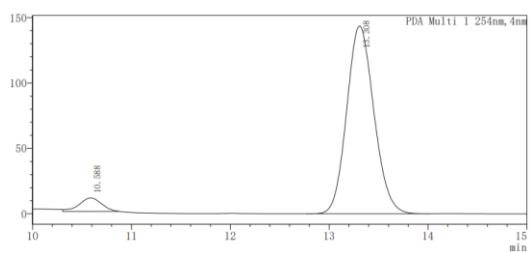

<Signal>

PDA Ch1 254nm

| Peak   | RetTime | Area    | Height | Area%   |
|--------|---------|---------|--------|---------|
| 1      | 10.588  | 163736  | 10361  | 5.620   |
| 2      | 13.308  | 2749677 | 143640 | 94.380  |
| Totals |         | 2913414 | 154001 | 100.000 |

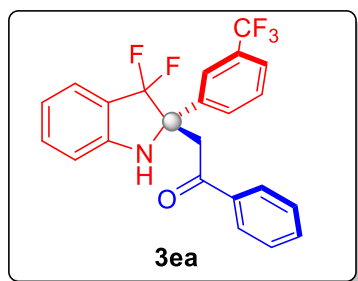

Enantiomeric excess is 86% determined by HPLC (Chiralpak AD-H, Hexane/Isopropanol 80/20, flow rate = 1.0 mL/min, 254 nm): major isomer:  $t_r = 7.70$  min; minor isomer:  $t_r = 5.46$  min.

$[\alpha]_D^{20} = +321$  ( $c = 0.2$ ,  $\text{CHCl}_3$ ).

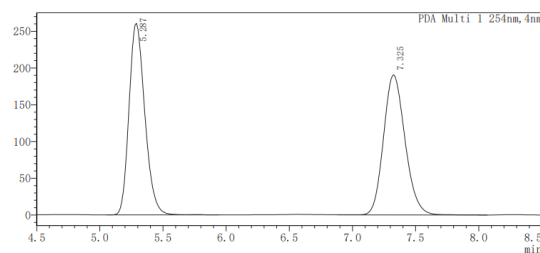

<Signal>

PDA Ch1 254nm

| Peak   | RetTime | Area    | Height | Area%   |
|--------|---------|---------|--------|---------|
| 1      | 5.287   | 2267028 | 260388 | 50.105  |
| 2      | 7.325   | 2257522 | 190486 | 49.895  |
| Totals |         | 4524550 | 450874 | 100.000 |

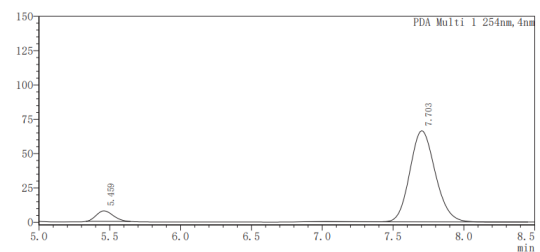

<Signal>

PDA Ch1 254nm

| Peak   | RetTime | Area   | Height | Area%   |
|--------|---------|--------|--------|---------|
| 1      | 5.459   | 63787  | 7695   | 7.112   |
| 2      | 7.703   | 833056 | 66435  | 92.888  |
| Totals |         | 896843 | 74130  | 100.000 |

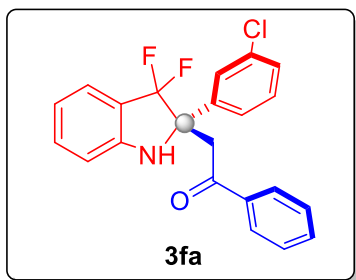

**Enantiomeric excess** is 88% determined by HPLC (Chiralpak AD-H, Hexane/Isopropanol 80/20, flow rate = 1.0 mL/min, 254 nm): major isomer: tr = 9.62 min; minor isomer: tr = 7.56 min.

$[\alpha]_D^{20} = +290$  (c = 0.2, CHCl<sub>3</sub>).

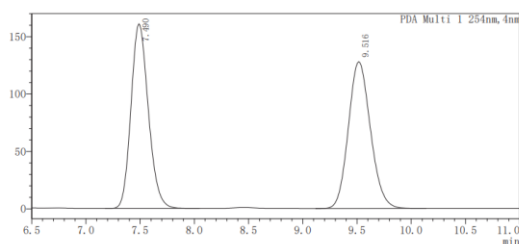

<Signal>

PDA Ch1 254nm

| Peak   | RetTime | Area    | Height | Area%   |
|--------|---------|---------|--------|---------|
| 1      | 7.490   | 1788417 | 160717 | 49.724  |
| 2      | 9.516   | 1808274 | 127750 | 50.276  |
| Totals |         | 3596691 | 288466 | 100.000 |

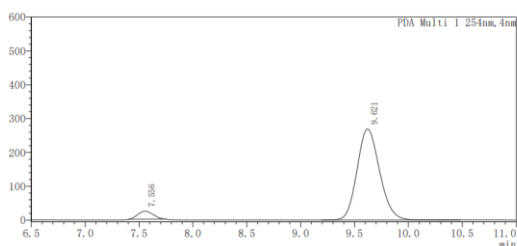

<Signal>

PDA Ch1 254nm

| Peak   | RetTime | Area    | Height | Area%   |
|--------|---------|---------|--------|---------|
| 1      | 7.556   | 236988  | 23650  | 5.718   |
| 2      | 9.621   | 3907858 | 268865 | 94.282  |
| Totals |         | 4144846 | 292515 | 100.000 |

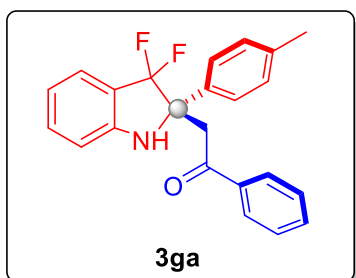

**Enantiomeric excess** is 90% determined by HPLC (Chiralpak AD-H, Hexane/Isopropanol 80/20, flow rate = 1.0 mL/min, 254 nm): major isomer: tr = 8.03 min; minor isomer: tr = 12.67 min.

$[\alpha]_D^{20} = +237$  (c = 0.2, CHCl<sub>3</sub>).

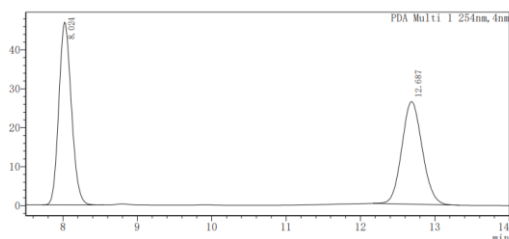

<Signal>

PDA Ch1 254nm

| Peak   | RetTime | Area    | Height | Area%   |
|--------|---------|---------|--------|---------|
| 1      | 8.024   | 551729  | 46927  | 52.277  |
| 2      | 12.687  | 503668  | 26338  | 47.723  |
| Totals |         | 1055397 | 73265  | 100.000 |

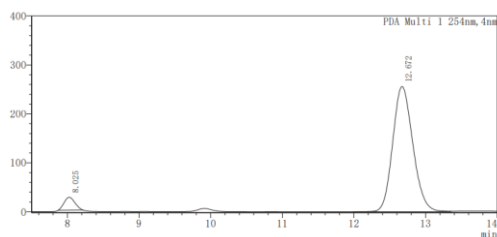

<Signal>

PDA Ch1 254nm

| Peak   | RetTime | Area    | Height | Area%   |
|--------|---------|---------|--------|---------|
| 1      | 8.025   | 271155  | 26232  | 5.137   |
| 2      | 12.672  | 5007612 | 255854 | 94.863  |
| Totals |         | 5278768 | 282086 | 100.000 |

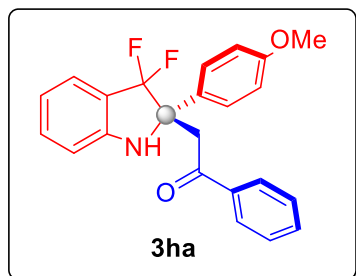

**Enantiomeric excess** is 92% determined by HPLC (Chiralpak AD-H, Hexane/Isopropanol 95/5, flow rate = 1.0 mL/min, 254 nm): major isomer: tr = 46.28 min; minor isomer: tr = 26.79 min.

$[\alpha]_D^{20} = +273$  (c = 0.2, CHCl<sub>3</sub>).

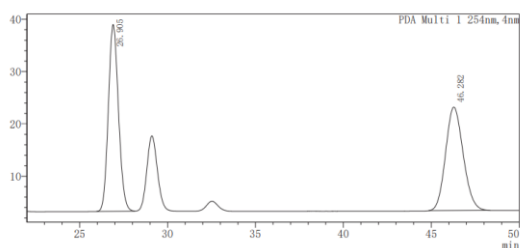

<Signal>

PDA Ch1 254nm

| Peak   | RetTime | Area    | Height | Area%   |
|--------|---------|---------|--------|---------|
| 1      | 26.905  | 1432040 | 35717  | 50.980  |
| 2      | 46.282  | 1376974 | 19777  | 49.020  |
| Totals |         | 2809014 | 55494  | 100.000 |

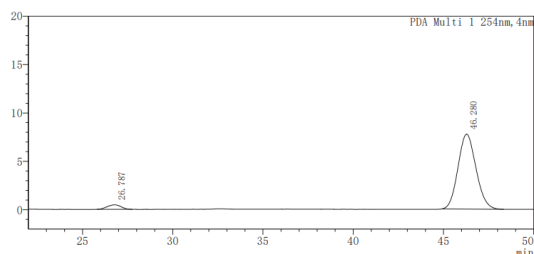

<Signal>

PDA Ch1 254nm

| Peak   | RetTime | Area   | Height | Area%   |
|--------|---------|--------|--------|---------|
| 1      | 26.787  | 24832  | 466    | 4.413   |
| 2      | 46.280  | 537836 | 7746   | 95.587  |
| Totals |         | 562668 | 8213   | 100.000 |

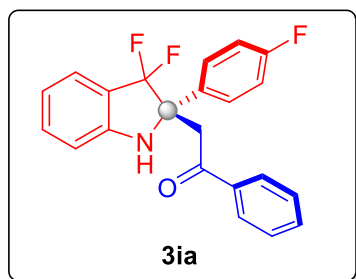

**Enantiomeric excess** is 94% determined by HPLC (Chiralpak AD-H, Hexane/Isopropanol 80/20, flow rate = 1.0 mL/min, 254 nm): major isomer: tr = 10.88 min; minor isomer: tr = 8.05 min.

$[\alpha]_D^{20} = +268$  (c = 0.2, CHCl<sub>3</sub>).



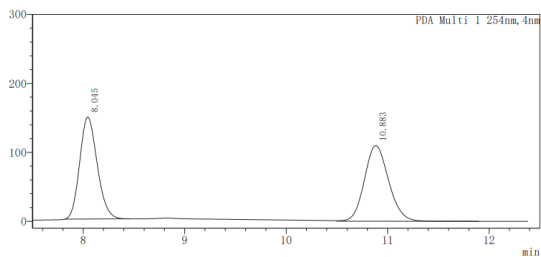

<Signal>

PDA Ch1 254nm

| Peak   | RetTime | Area    | Height | Area%   |
|--------|---------|---------|--------|---------|
| 1      | 8.045   | 1773984 | 147905 | 49.357  |
| 2      | 10.883  | 1820220 | 109596 | 50.643  |
| Totals |         | 3594204 | 257501 | 100.000 |

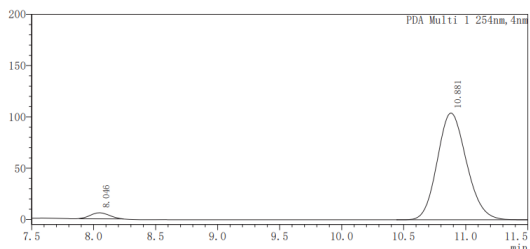

<Signal>

PDA Ch1 254nm

| Peak   | RetTime | Area    | Height | Area%   |
|--------|---------|---------|--------|---------|
| 1      | 8.046   | 61920   | 5827   | 3.495   |
| 2      | 10.881  | 1709961 | 104117 | 96.505  |
| Totals |         | 1771882 | 109944 | 100.000 |

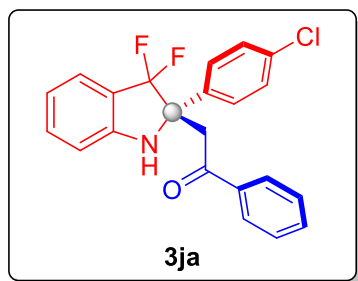

**Enantiomeric excess is 90%** determined by HPLC (Chiralpak AD-H, Hexane/Isopropanol 80/20, flow rate = 1.0 mL/min, 254 nm): major isomer: tr = 11.6 min; minor isomer: tr = 8.80 min.

$[\alpha]_D^{20} = +169$  (c = 0.2, CHCl<sub>3</sub>).

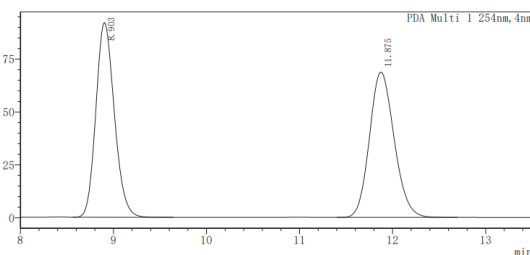

<Signal>

PDA Ch1 254nm

| Peak   | RetTime | Area    | Height | Area%   |
|--------|---------|---------|--------|---------|
| 1      | 8.903   | 1267724 | 91910  | 49.932  |
| 2      | 11.875  | 1271175 | 68704  | 50.068  |
| Totals |         | 2538899 | 160613 | 100.000 |

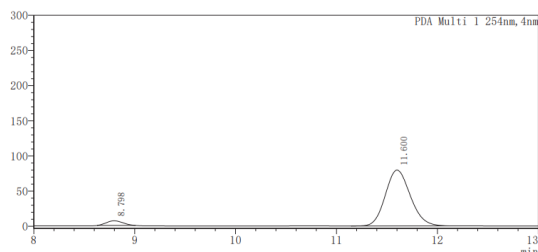

<Signal>

PDA Ch1 254nm

| Peak   | RetTime | Area    | Height | Area%   |
|--------|---------|---------|--------|---------|
| 1      | 8.798   | 74227   | 6580   | 5.147   |
| 2      | 11.600  | 1367786 | 79395  | 94.853  |
| Totals |         | 1442013 | 85975  | 100.000 |

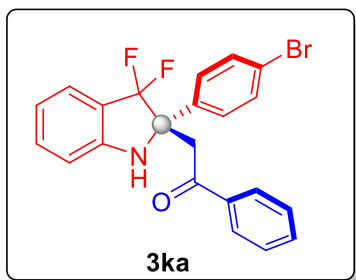

**Enantiomeric excess** is 88% determined by HPLC (Chiralpak AD-H, Hexane/Isopropanol 80/20, flow rate = 1.0 mL/min, 254 nm): major isomer: tr = 12.99 min; minor isomer: tr = 9.80 min.

$[\alpha]_D^{20} = +277$  (c = 0.2, CHCl<sub>3</sub>).

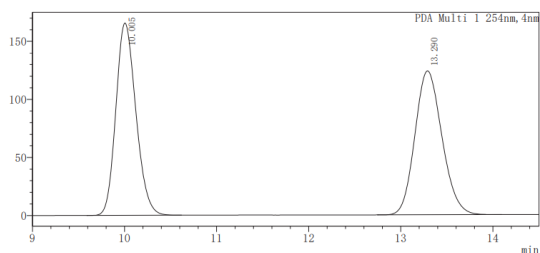

<Signal>

PDA Ch1 254nm

| Peak   | RetTime | Area    | Height | Area%   |
|--------|---------|---------|--------|---------|
| 1      | 10.005  | 2511328 | 165606 | 49.825  |
| 2      | 13.290  | 2528967 | 123953 | 50.175  |
| Totals |         | 5040295 | 289559 | 100.000 |

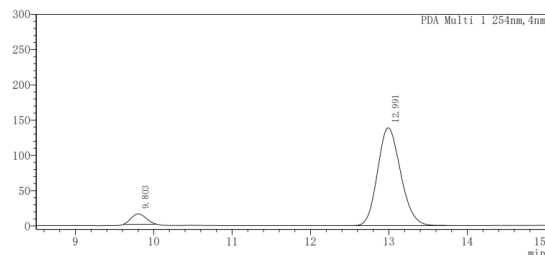

<Signal>

PDA Ch1 254nm

| Peak   | RetTime | Area    | Height | Area%   |
|--------|---------|---------|--------|---------|
| 1      | 9.803   | 194244  | 14832  | 6.399   |
| 2      | 12.991  | 2841422 | 138835 | 93.601  |
| Totals |         | 3035666 | 153667 | 100.000 |

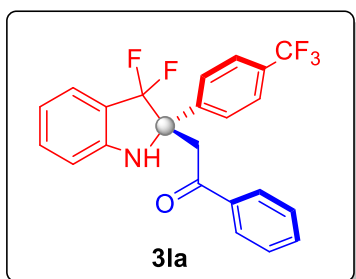

**Enantiomeric excess** is 66% determined by HPLC (Chiralpak AD-H, Hexane/Isopropanol 80/20, flow rate = 1.0 mL/min, 254 nm): major isomer: tr = 7.51 min; minor isomer: tr = 6.83 min.

$[\alpha]_D^{20} = +117$  (c = 0.2, CHCl<sub>3</sub>).

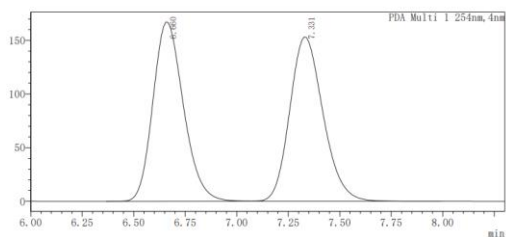

<Signal>

PDA Ch1 254nm

| Peak   | RetTime | Area    | Height | Area%   |
|--------|---------|---------|--------|---------|
| 1      | 6.660   | 1723917 | 167174 | 49.941  |
| 2      | 7.331   | 1727964 | 153301 | 50.059  |
| Totals |         | 3451881 | 320474 | 100.000 |

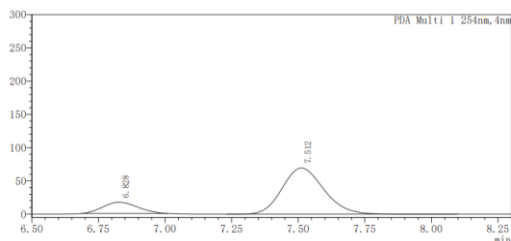

<Signal>

PDA Ch1 254nm

| Peak   | RetTime | Area   | Height | Area%   |
|--------|---------|--------|--------|---------|
| 1      | 6.828   | 152206 | 16760  | 16.701  |
| 2      | 7.512   | 759123 | 69500  | 83.299  |
| Totals |         | 911329 | 86259  | 100.000 |

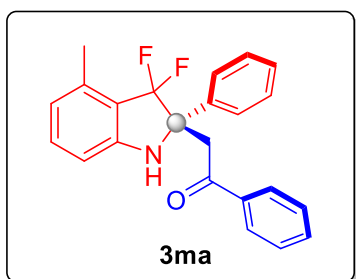

Enantiomeric excess is 98% determined by HPLC (Chiralpak AD-H, Hexane/Isopropanol 80/20,

flow rate = 1.0 mL/min, 254 nm): major isomer: tr = 7.12 min; minor isomer: tr = 8.62 min.

$[\alpha]_D^{20} = +178$  (c = 0.2, CHCl<sub>3</sub>).

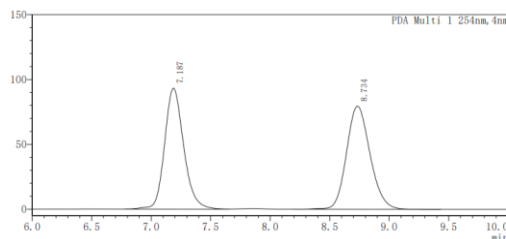

<Signal>

PDA Ch1 254nm

| Peak   | RetTime | Area    | Height | Area%   |
|--------|---------|---------|--------|---------|
| 1      | 7.187   | 1043132 | 93352  | 48.725  |
| 2      | 8.734   | 1097737 | 79604  | 51.275  |
| Totals |         | 2140869 | 172956 | 100.000 |

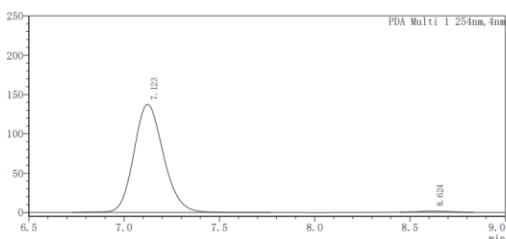

<Signal>

PDA Ch1 254nm

| Peak   | RetTime | Area    | Height | Area%   |
|--------|---------|---------|--------|---------|
| 1      | 7.123   | 1483813 | 137552 | 98.778  |
| 2      | 8.624   | 18357   | 1603   | 1.222   |
| Totals |         | 1502170 | 139155 | 100.000 |

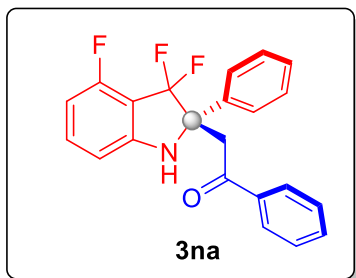

**Enantiomeric excess** is 94% determined by HPLC (Chiralpak AD-H, Hexane/Isopropanol 80/20, flow rate = 0.50 mL/min, 254 nm): major isomer: tr = 18.34 min; minor isomer: tr = 17.42 min.

$[\alpha]_D^{20} = +178$  (c = 0.2, CHCl<sub>3</sub>).

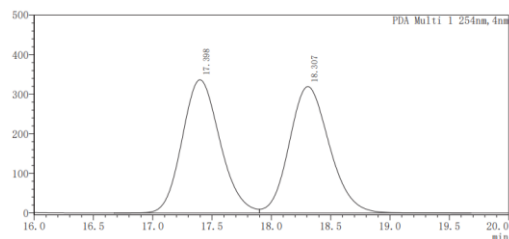

<Signal>

PDA Ch1 254nm

| Peak   | RetTime | Area     | Height | Area%   |
|--------|---------|----------|--------|---------|
| 1      | 17.398  | 7472229  | 336690 | 49.895  |
| 2      | 18.307  | 7503764  | 319370 | 50.105  |
| Totals |         | 14975993 | 656060 | 100.000 |

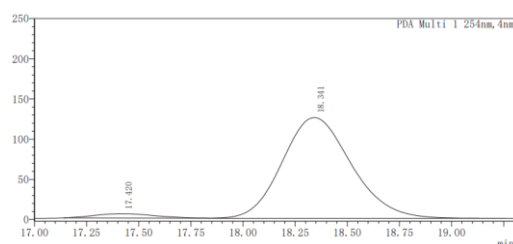

<Signal>

PDA Ch1 254nm

| Peak   | RetTime | Area    | Height | Area%   |
|--------|---------|---------|--------|---------|
| 1      | 17.420  | 104018  | 5358   | 3.465   |
| 2      | 18.341  | 2897739 | 125395 | 96.535  |
| Totals |         | 3001757 | 130753 | 100.000 |

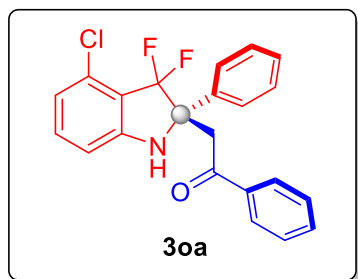

**Enantiomeric excess** is 94% determined by HPLC (Chiralpak AD-H, Hexane/Isopropanol 80/20, flow rate = 0.5 mL/min, 254 nm): major isomer: tr = 19.65 min; minor isomer: tr = 17.13 min.

$[\alpha]_D^{20} = +401$  (c = 0.2, CHCl<sub>3</sub>).

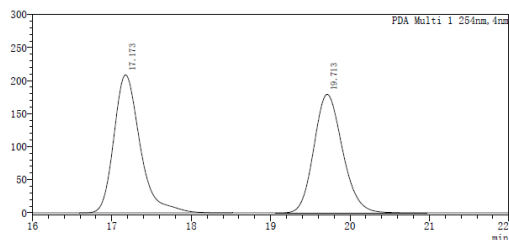

<Signal>

PDA Ch1 254nm

| Peak   | RetTime | Area    | Height | Area%   |
|--------|---------|---------|--------|---------|
| 1      | 17.173  | 4791309 | 208969 | 51.601  |
| 2      | 19.713  | 4493906 | 179451 | 48.399  |
| Totals |         | 9285215 | 388421 | 100.000 |

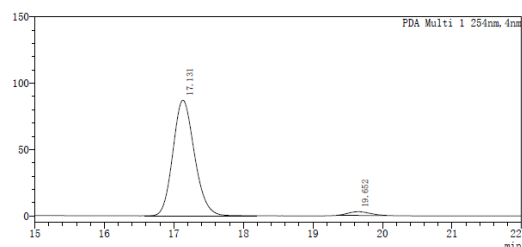

<Signal>

PDA Ch1 254nm

| Peak   | RetTime | Area    | Height | Area%   |
|--------|---------|---------|--------|---------|
| 1      | 17.131  | 1876433 | 87166  | 96.901  |
| 2      | 19.652  | 60011   | 2794   | 3.099   |
| Totals |         | 1936444 | 89960  | 100.000 |

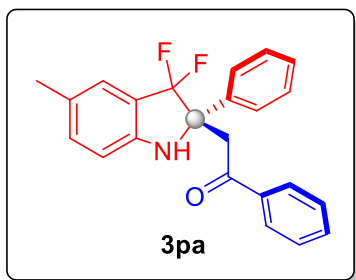

**Enantiomeric excess** is 94% determined by HPLC (Chiralpak AD-H, Hexane/Isopropanol 80/20, flow rate = 1.0 mL/min, 254 nm): major isomer: tr = 10.47 min; minor isomer: tr = 8.24 min.

$[\alpha]_D^{20} = +206$  (c = 0.2, CHCl<sub>3</sub>).

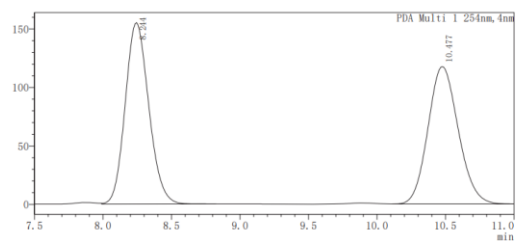

<Signal>

PDA Ch1 254nm

| Peak   | RetTime | Area    | Height | Area%   |
|--------|---------|---------|--------|---------|
| 1      | 8.244   | 1855764 | 155130 | 50.609  |
| 2      | 10.477  | 1811071 | 117618 | 49.391  |
| Totals |         | 3666835 | 272749 | 100.000 |

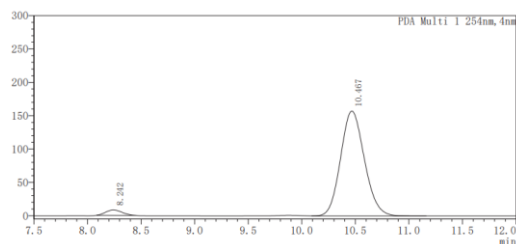

<Signal>

PDA Ch1 254nm

| Peak   | RetTime | Area    | Height | Area%   |
|--------|---------|---------|--------|---------|
| 1      | 8.242   | 87273   | 8153   | 3.466   |
| 2      | 10.467  | 2430798 | 157336 | 96.534  |
| Totals |         | 2518072 | 165489 | 100.000 |

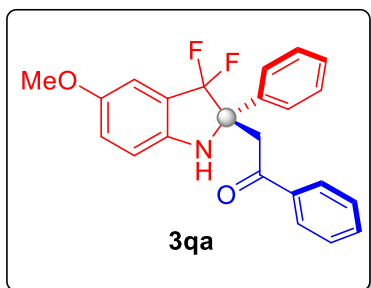

**Enantiomeric excess** is 94% determined by HPLC (Chiralpak AD-H, Hexane/Isopropanol 80/20, flow rate = 1.0 mL/min, 254 nm): major isomer: tr = 12.45 min; minor isomer: tr = 11.26 min.

$[\alpha]_D^{20} = +160$  (c = 0.2, CHCl<sub>3</sub>).

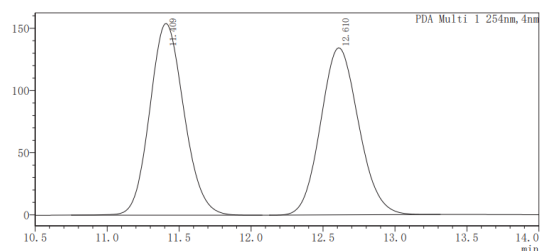

<Signal>

PDA Ch1 254nm

| Peak   | RetTime | Area    | Height | Area%   |
|--------|---------|---------|--------|---------|
| 1      | 11.409  | 2551398 | 154003 | 50.768  |
| 2      | 12.610  | 2474244 | 134337 | 49.232  |
| Totals |         | 5025643 | 288340 | 100.000 |

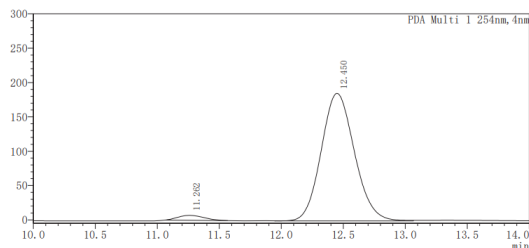

<Signal>

PDA Ch1 254nm

| Peak   | RetTime | Area    | Height | Area%   |
|--------|---------|---------|--------|---------|
| 1      | 11.262  | 105005  | 7226   | 2.945   |
| 2      | 12.450  | 3460796 | 185754 | 97.055  |
| Totals |         | 3565800 | 192979 | 100.000 |

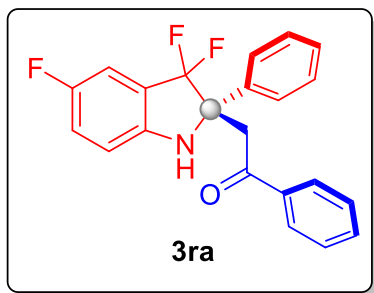

**Enantiomeric excess** is 92% determined by HPLC (Chiralpak AD-H, Hexane/Isopropanol 80/20,

flow rate = 1.0 mL/min, 254 nm): major isomer: tr = 9.85 min; minor isomer: tr = 8.06 min.

$[\alpha]^{20}_D = +251$  (c = 0.2, CHCl<sub>3</sub>).

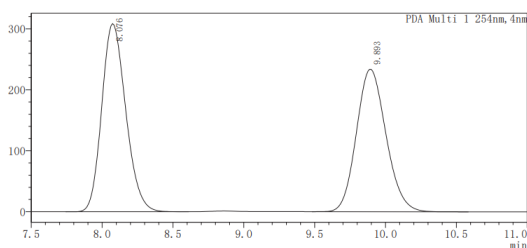

<Signal>

PDA Ch1 254nm

| Peak   | RetTime | Area    | Height | Area%   |
|--------|---------|---------|--------|---------|
| 1      | 8.076   | 3646617 | 308636 | 51.777  |
| 2      | 9.893   | 3396361 | 233831 | 48.223  |
| Totals |         | 7042978 | 542467 | 100.000 |

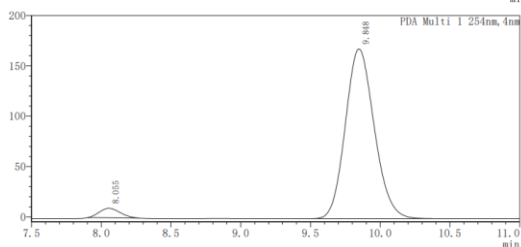

<Signal>

PDA Ch1 254nm

| Peak   | RetTime | Area    | Height | Area%   |
|--------|---------|---------|--------|---------|
| 1      | 8.055   | 97939   | 9389   | 3.870   |
| 2      | 9.848   | 2432512 | 168829 | 96.130  |
| Totals |         | 2530451 | 178218 | 100.000 |

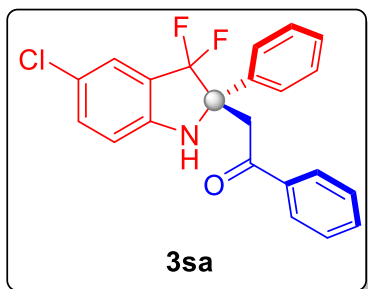

**Enantiomeric excess** is 92% determined by HPLC (Chiralpak AD-H, Hexane/Isopropanol 80/20,

flow rate = 1.0 mL/min, 254 nm): major isomer: tr = 10.595 min; minor isomer: tr = 8.62 min.

$[\alpha]^{20}_D = +295$  (c = 0.2, CHCl<sub>3</sub>).

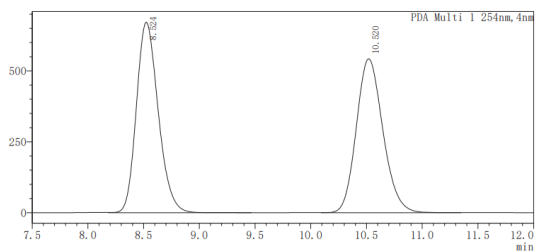

<Signal>

PDA Ch1 254nm

| Peak   | RetTime | Area     | Height  | Area%   |
|--------|---------|----------|---------|---------|
| 1      | 8.524   | 9152992  | 671955  | 50.376  |
| 2      | 10.520  | 9016229  | 543100  | 49.624  |
| Totals |         | 18169221 | 1215055 | 100.000 |

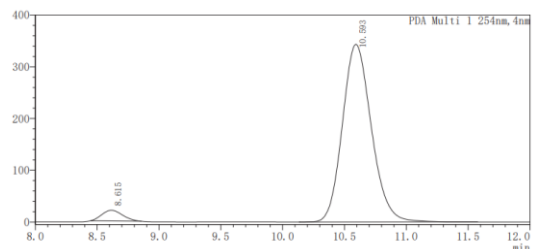

<Signal>

PDA Ch1 254nm

| Peak   | RetTime | Area    | Height | Area%   |
|--------|---------|---------|--------|---------|
| 1      | 8.615   | 240969  | 20649  | 4.129   |
| 2      | 10.593  | 5595598 | 343423 | 95.871  |
| Totals |         | 5836567 | 364072 | 100.000 |

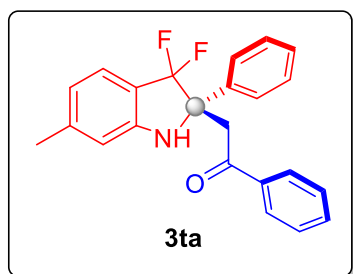

Enantiomeric excess is 82% determined by HPLC (Chiralpak AD-H, Hexane/Isopropanol 80/20, flow rate = 1.0 mL/min, 254 nm): major isomer: tr = 11.75 min; minor isomer: tr = 7.90 min.

$[\alpha]_D^{20} = +122$  (c = 0.2, CHCl<sub>3</sub>).

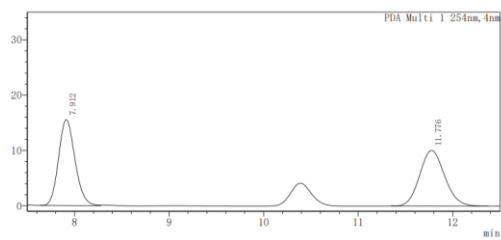

<Signal>

PDA Ch1 254nm

| Peak   | RetTime | Area   | Height | Area%   |
|--------|---------|--------|--------|---------|
| 1      | 7.912   | 187644 | 15543  | 50.355  |
| 2      | 11.776  | 185001 | 10063  | 49.645  |
| Totals |         | 372646 | 25606  | 100.000 |

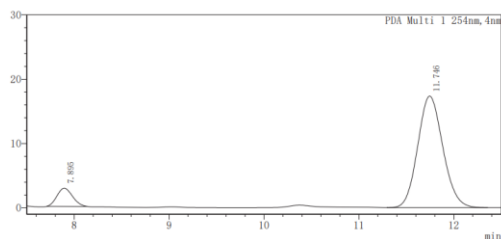

<Signal>

PDA Ch1 254nm

| Peak   | RetTime | Area   | Height | Area%   |
|--------|---------|--------|--------|---------|
| 1      | 7.895   | 32061  | 2829   | 9.135   |
| 2      | 11.746  | 318913 | 17337  | 90.865  |
| Totals |         | 350974 | 20166  | 100.000 |

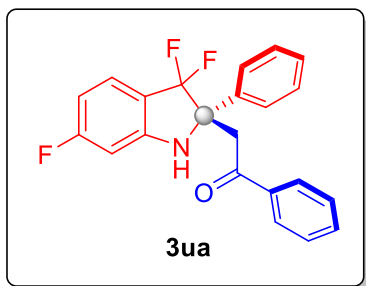

**Enantiomeric excess** is 90% determined by HPLC (Chiralpak AD-H, Hexane/Isopropanol 80/20,

flow rate = 1.0 mL/min, 254 nm): major isomer: tr = 10.19 min; minor isomer: tr = 9.00 min.

$[\alpha]_D^{20} = +217$  (c = 0.2, CHCl<sub>3</sub>).

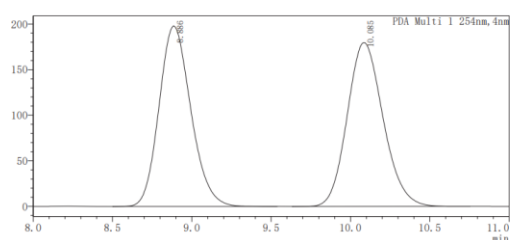

<Signal>

PDA Ch1 254nm

| Peak   | RetTime | Area    | Height | Area%   |
|--------|---------|---------|--------|---------|
| 1      | 8.886   | 2765821 | 198129 | 49.375  |
| 2      | 10.085  | 2835877 | 179719 | 50.625  |
| Totals |         | 5601698 | 377848 | 100.000 |

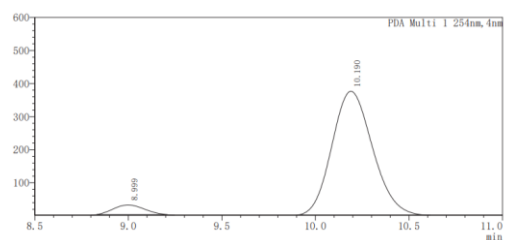

<Signal>

PDA Ch1 254nm

| Peak   | RetTime | Area    | Height | Area%   |
|--------|---------|---------|--------|---------|
| 1      | 8.999   | 333205  | 29187  | 5.472   |
| 2      | 10.190  | 5755641 | 376730 | 94.528  |
| Totals |         | 6088846 | 405917 | 100.000 |

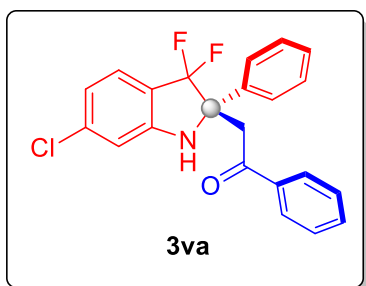

**Enantiomeric excess** is 80% determined by HPLC (Chiralpak AD-H, Hexane/Isopropanol 80/20,

flow rate = 1.0 mL/min, 254 nm): major isomer: tr = 10.38 min; minor isomer: tr = 8.76 min.

$[\alpha]_D^{20} = +261$  (c = 0.2, CHCl<sub>3</sub>).

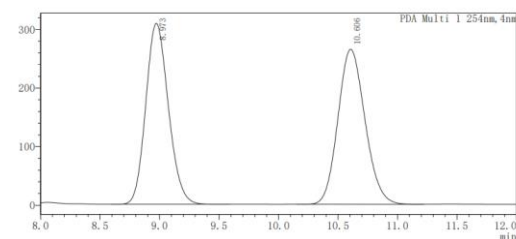

<Signal>

PDA Ch1 254nm

| Peak   | RetTime | Area    | Height | Area%   |
|--------|---------|---------|--------|---------|
| 1      | 8.973   | 4081903 | 308855 | 49.300  |
| 2      | 10.606  | 4197835 | 264679 | 50.700  |
| Totals |         | 8279738 | 573534 | 100.000 |



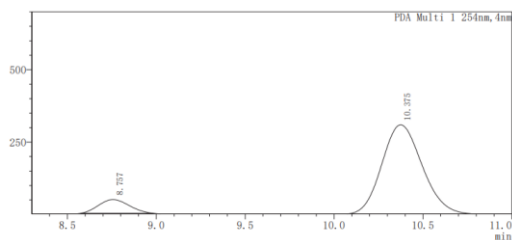

<Signal>

PDA Ch1 254nm

| Peak   | RetTime | Area    | Height | Area%   |
|--------|---------|---------|--------|---------|
| 1      | 8.757   | 562001  | 47429  | 10.253  |
| 2      | 10.375  | 4919235 | 309765 | 89.747  |
| Totals |         | 5481236 | 357195 | 100.000 |

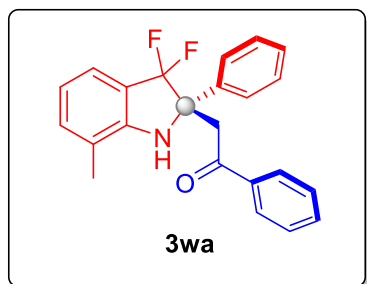

**Enantiomeric excess** is 20% determined by HPLC (Chiralpak AD-H, Hexane/Isopropanol 80/20, flow rate = 1.0 mL/min, 254 nm): major isomer: tr = 9.42 min; minor isomer: tr = 8.58 min.

$[\alpha]_D^{20} = +33$  (c = 0.2, CHCl<sub>3</sub>).

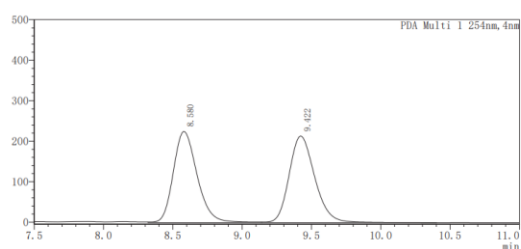

<Signal>

PDA Ch1 254nm

| Peak   | RetTime | Area    | Height | Area%   |
|--------|---------|---------|--------|---------|
| 1      | 8.580   | 2683545 | 224756 | 49.517  |
| 2      | 9.422   | 2735939 | 213474 | 50.483  |
| Totals |         | 5419484 | 438230 | 100.000 |

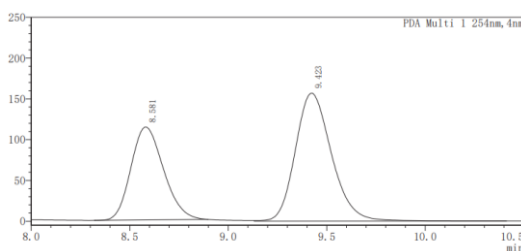

<Signal>

PDA Ch1 254nm

| Peak   | RetTime | Area    | Height | Area%   |
|--------|---------|---------|--------|---------|
| 1      | 8.581   | 1313366 | 113888 | 39.603  |
| 2      | 9.423   | 2002936 | 156774 | 60.397  |
| Totals |         | 3316302 | 270662 | 100.000 |

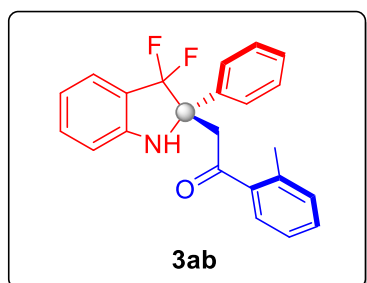

**Enantiomeric excess** is 86% determined by HPLC (Chiralpak AD-H, Hexane/Isopropanol 80/20, flow rate = 1.0 mL/min, 254 nm): major isomer: tr = 6.76 min; minor isomer: tr = 6.29 min.

$[\alpha]_D^{20} = +98$  (c = 0.2, CHCl<sub>3</sub>).

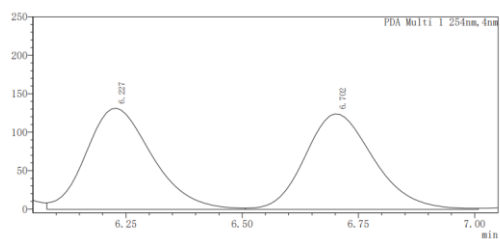

<Signal>

PDA Ch1 254nm

| Peak   | RetTime | Area    | Height | Area%   |
|--------|---------|---------|--------|---------|
| 1      | 6.227   | 1298352 | 131555 | 50.465  |
| 2      | 6.702   | 1274446 | 124101 | 49.535  |
| Totals |         | 2572799 | 255656 | 100.000 |

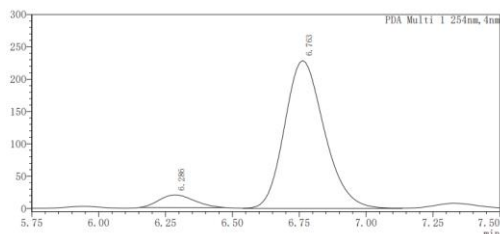

<Signal>

PDA Ch1 254nm

| Peak   | RetTime | Area    | Height | Area%   |
|--------|---------|---------|--------|---------|
| 1      | 6.286   | 175974  | 19529  | 6.911   |
| 2      | 6.763   | 2370333 | 228912 | 93.089  |
| Totals |         | 2546307 | 248441 | 100.000 |

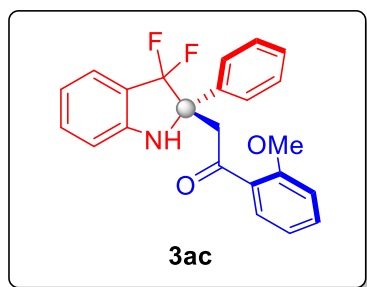

Enantiomeric excess is 92% determined by HPLC (Chiralpak AD-H, Hexane/Isopropanol 80/20, flow rate = 0.5 mL/min, 254 nm): major isomer: tr = 21.02 min; minor isomer: tr = 23.67 min.

$[\alpha]_D^{20} = +280$  (c = 0.2, CHCl<sub>3</sub>).

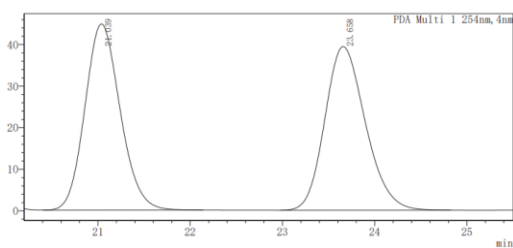

<Signal>

PDA Ch1 254nm

| Peak   | RetTime | Area    | Height | Area%   |
|--------|---------|---------|--------|---------|
| 1      | 21.039  | 1188529 | 44765  | 49.703  |
| 2      | 23.658  | 1202751 | 39363  | 50.297  |
| Totals |         | 2391280 | 84128  | 100.000 |

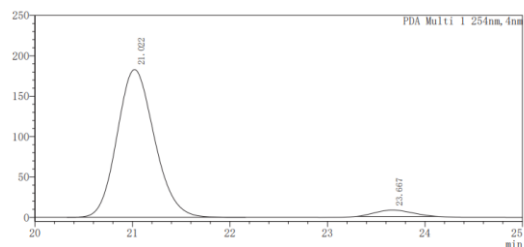

<Signal>

PDA Ch1 254nm

| Peak   | RetTime | Area    | Height | Area%   |
|--------|---------|---------|--------|---------|
| 1      | 21.022  | 4873649 | 182922 | 95.929  |
| 2      | 23.667  | 206809  | 7924   | 4.071   |
| Totals |         | 5080458 | 190846 | 100.000 |

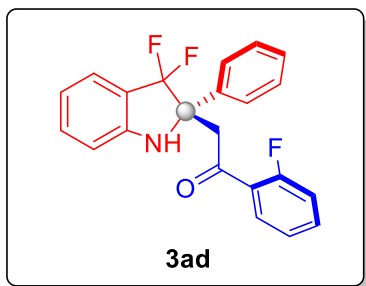

**Enantiomeric excess** is 96% determined by HPLC (Chiralpak AD-H, Hexane/Isopropanol 80/20,

flow rate = 0.5 mL/min, 254 nm): major isomer: tr = 12.84 min; minor isomer: tr = 12.06 min.

$[\alpha]_D^{20} = +307$  (c = 0.2, CHCl<sub>3</sub>).

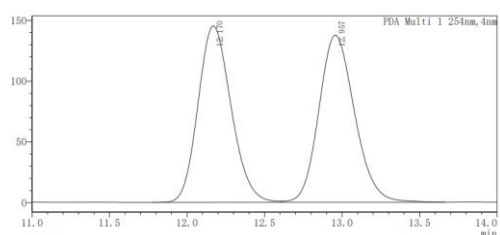

<Signal>

PDA Ch1 254nm

| Peak   | RetTime | Area    | Height | Area%   |
|--------|---------|---------|--------|---------|
| 1      | 12.170  | 2152565 | 145200 | 49.423  |
| 2      | 12.957  | 2202868 | 137495 | 50.577  |
| Totals |         | 4355433 | 282694 | 100.000 |

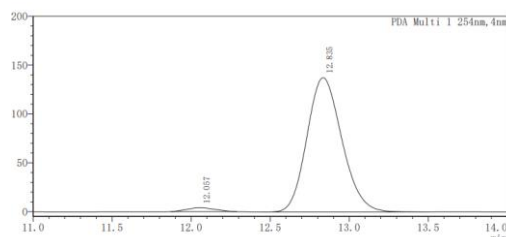

<Signal>

PDA Ch1 254nm

| Peak   | RetTime | Area    | Height | Area%   |
|--------|---------|---------|--------|---------|
| 1      | 12.057  | 49523   | 3910   | 2.281   |
| 2      | 12.835  | 2121398 | 137580 | 97.719  |
| Totals |         | 2170922 | 141490 | 100.000 |

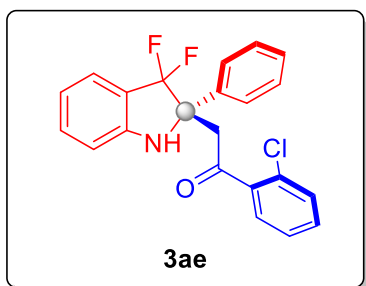

**Enantiomeric excess** is 90% determined by HPLC (Chiralpak AD-H, Hexane/Isopropanol 80/20,

flow rate = 1.0 mL/min, 254 nm): major isomer: tr = 7.10 min; minor isomer: tr = 7.51 min.

$[\alpha]_D^{20} = +194$  (c = 0.2, CHCl<sub>3</sub>).

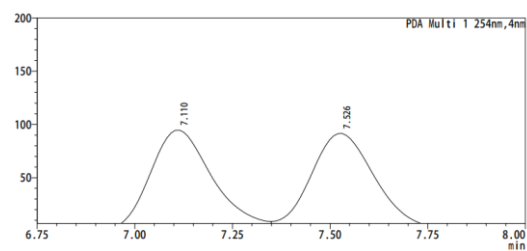

<Signal>

PDA Ch1 254nm

| Peak   | RetTime | Area    | Height | Area%   |
|--------|---------|---------|--------|---------|
| 1      | 7.110   | 1076555 | 94622  | 50.039  |
| 2      | 7.526   | 1074868 | 91528  | 49.961  |
| Totals |         | 2151422 | 186150 | 100.000 |

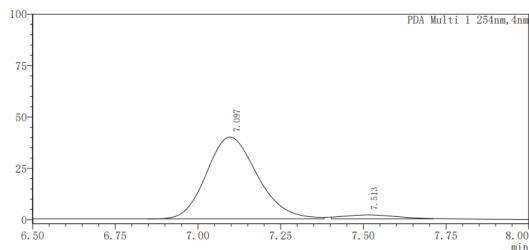

<Signal>

PDA Ch1 254nm

| Peak   | RetTime | Area   | Height | Area%   |
|--------|---------|--------|--------|---------|
| 1      | 7.097   | 428342 | 39890  | 95.059  |
| 2      | 7.513   | 22266  | 1968   | 4.941   |
| Totals |         | 450608 | 41859  | 100.000 |

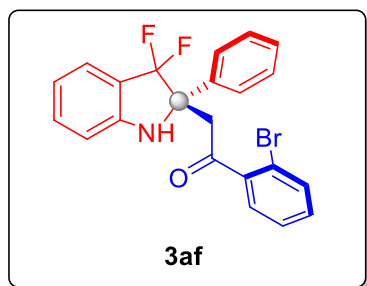

**Enantiomeric excess** is 94% determined by HPLC (Chiralpak AD-H, Hexane/Isopropanol 80/20, flow rate = 1.0 mL/min, 254 nm): major isomer: tr = 7.41 min; minor isomer: tr = 8.01 min.

$[\alpha]_D^{20} = +114$  (c = 0.2, CHCl<sub>3</sub>).

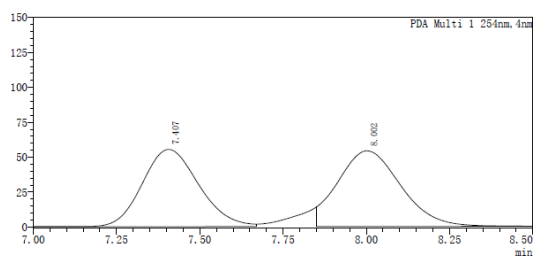

<Signal>

PDA Ch1 254nm

| Peak   | RetTime | Area    | Height | Area%   |
|--------|---------|---------|--------|---------|
| 1      | 7.407   | 652161  | 55270  | 47.962  |
| 2      | 8.002   | 707573  | 54174  | 52.038  |
| Totals |         | 1359733 | 109444 | 100.000 |

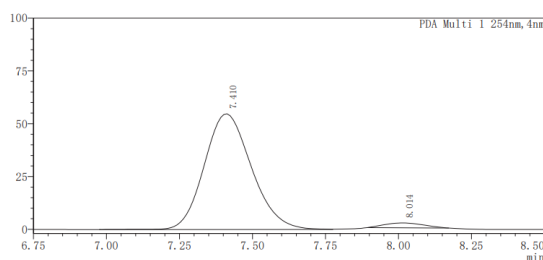

<Signal>

PDA Ch1 254nm

| Peak   | RetTime | Area   | Height | Area%   |
|--------|---------|--------|--------|---------|
| 1      | 7.410   | 617016 | 54782  | 96.682  |
| 2      | 8.014   | 21172  | 2286   | 3.318   |
| Totals |         | 638188 | 57068  | 100.000 |

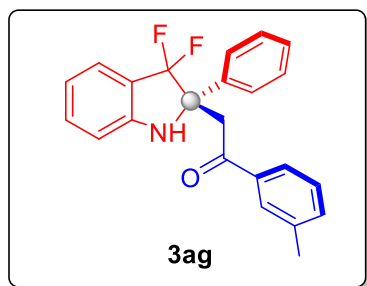

**Enantiomeric excess** is 92% determined by HPLC (Chiralpak AD-H, Hexane/Isopropanol 80/20, flow rate = 0.5 mL/min, 254 nm): major isomer: tr = 14.39 min; minor isomer: tr = 12.4 min.

$[\alpha]_D^{20} = +342$  (c = 0.2, CHCl<sub>3</sub>).

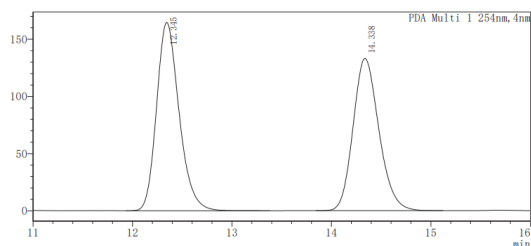

<Signal>

PDA Ch1 254nm

| Peak   | RetTime | Area    | Height | Area%   |
|--------|---------|---------|--------|---------|
| 1      | 12.345  | 2595073 | 164523 | 51.916  |
| 2      | 14.338  | 2403502 | 133085 | 48.084  |
| Totals |         | 4998574 | 297608 | 100.000 |

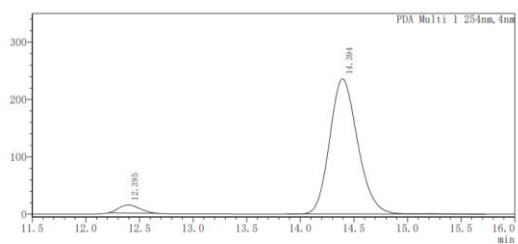

<Signal>

PDA Ch1 254nm

| Peak   | RetTime | Area    | Height | Area%   |
|--------|---------|---------|--------|---------|
| 1      | 12.395  | 190413  | 14125  | 4.244   |
| 2      | 14.394  | 4296753 | 235773 | 95.756  |
| Totals |         | 4487166 | 249897 | 100.000 |

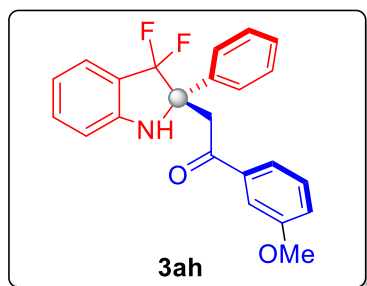

**Enantiomeric excess** is 94% determined by HPLC (Chiralpak AD-H, Hexane/Isopropanol 80/20,

flow rate = 0.5 mL/min, 254 nm): major isomer: tr = 17.96 min; minor isomer: tr = 14.26 min.

$[\alpha]_D^{20} = +326$  (c = 0.2, CHCl<sub>3</sub>).

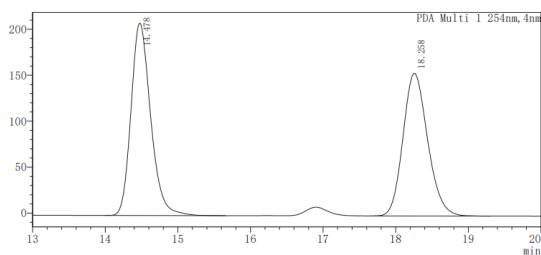

<Signal>

PDA Ch1 254nm

| Peak   | RetTime | Area    | Height | Area%   |
|--------|---------|---------|--------|---------|
| 1      | 14.478  | 3941833 | 209201 | 51.819  |
| 2      | 18.258  | 3665035 | 155099 | 48.181  |
| Totals |         | 7606869 | 364300 | 100.000 |

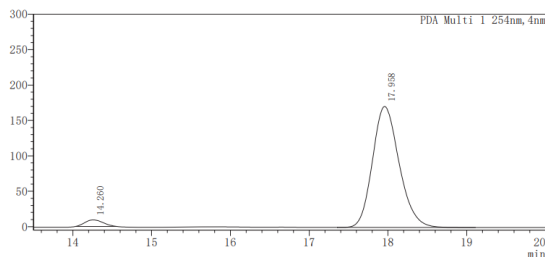

<Signal>

PDA Ch1 254nm

| Peak   | RetTime | Area    | Height | Area%   |
|--------|---------|---------|--------|---------|
| 1      | 14.260  | 144781  | 9232   | 3.466   |
| 2      | 17.958  | 4031905 | 170957 | 96.534  |
| Totals |         | 4176685 | 180189 | 100.000 |

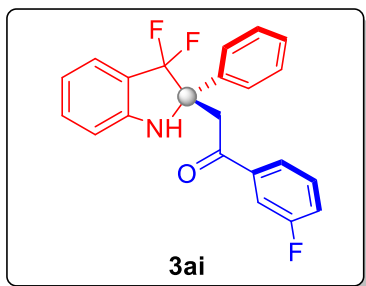

**Enantiomeric excess** is 96% determined by HPLC (Chiralpak AD-H, Hexane/Isopropanol 80/20,

flow rate = 0.5 mL/min, 254 nm): major isomer: tr = 14.54 min; minor isomer: tr = 11.70 min.

$[\alpha]_D^{20} = +366$  (c = 0.2, CHCl<sub>3</sub>).

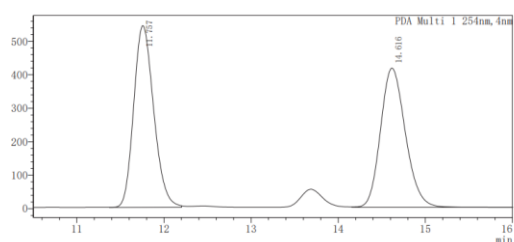

<Signal>

PDA Ch1 254nm

| Peak   | RetTime | Area     | Height | Area%   |
|--------|---------|----------|--------|---------|
| 1      | 11.757  | 8658900  | 542666 | 51.127  |
| 2      | 14.616  | 8277257  | 415553 | 48.873  |
| Totals |         | 16936157 | 958219 | 100.000 |

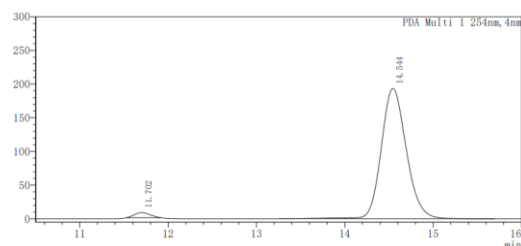

<Signal>

PDA Ch1 254nm

| Peak   | RetTime | Area    | Height | Area%   |
|--------|---------|---------|--------|---------|
| 1      | 11.702  | 94049   | 7575   | 2.396   |
| 2      | 14.544  | 3831390 | 193574 | 97.604  |
| Totals |         | 3925440 | 201149 | 100.000 |

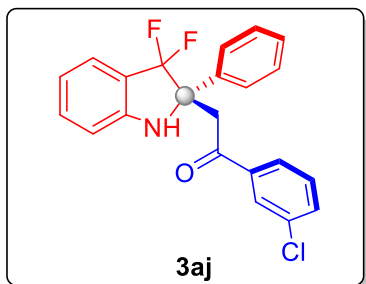

**Enantiomeric excess** is 96% determined by HPLC (Chiralpak AD-H, Hexane/Isopropanol 80/20,

flow rate = 0.5 mL/min, 254 nm): major isomer: tr = 14.54 min; minor isomer: tr = 12.69 min.

$[\alpha]_D^{20} = +226$  (c = 0.2, CHCl<sub>3</sub>).

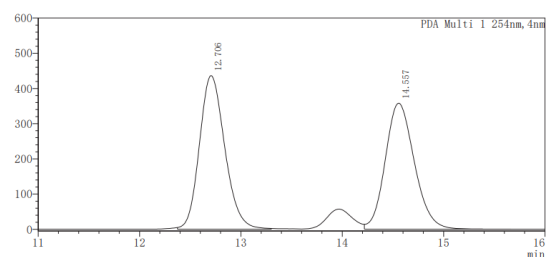

<Signal>

PDA Ch1 254nm

| Peak   | RetTime | Area     | Height | Area%   |
|--------|---------|----------|--------|---------|
| 1      | 12.706  | 7578545  | 436295 | 51.542  |
| 2      | 14.557  | 7124984  | 357893 | 48.458  |
| Totals |         | 14703529 | 794189 | 100.000 |

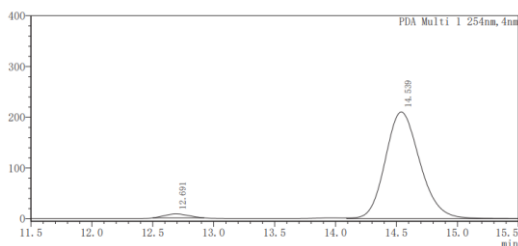

<Signal>

PDA Ch1 254nm

| Peak   | RetTime | Area    | Height | Area%   |
|--------|---------|---------|--------|---------|
| 1      | 12.691  | 104592  | 7738   | 2.447   |
| 2      | 14.539  | 4169731 | 210375 | 97.553  |
| Totals |         | 4274324 | 218112 | 100.000 |

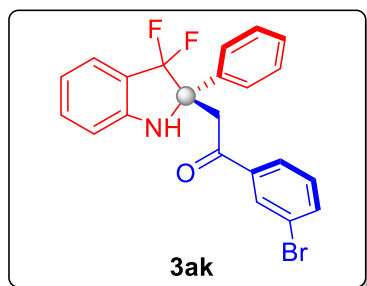

**Enantiomeric excess** is 94% determined by HPLC (Chiralpak AD-H, Hexane/Isopropanol 80/20, flow rate = 0.5mL/min, 254 nm): major isomer: tr = 15.35 min; minor isomer: tr = 13.72 min.

$[\alpha]_D^{20} = +342$  (c = 0.2, CHCl<sub>3</sub>).

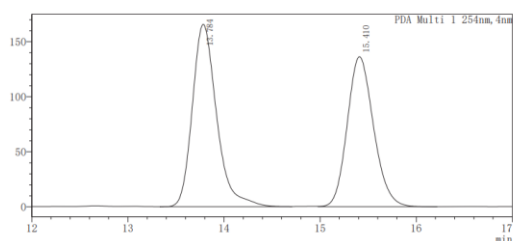

<Signal>

PDA Ch1 254nm

| Peak   | RetTime | Area    | Height | Area%   |
|--------|---------|---------|--------|---------|
| 1      | 13.784  | 2914609 | 165605 | 52.901  |
| 2      | 15.410  | 2594991 | 136160 | 47.099  |
| Totals |         | 5509600 | 301765 | 100.000 |

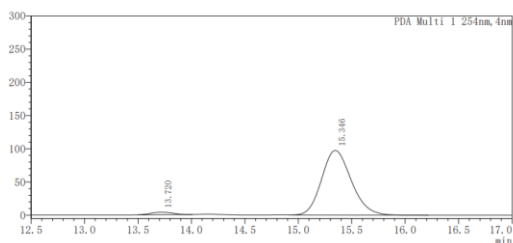

<Signal>

PDA Ch1 254nm

| Peak   | RetTime | Area    | Height | Area%   |
|--------|---------|---------|--------|---------|
| 1      | 13.720  | 54640   | 3783   | 2.811   |
| 2      | 15.346  | 1889040 | 97500  | 97.189  |
| Totals |         | 1943679 | 101283 | 100.000 |

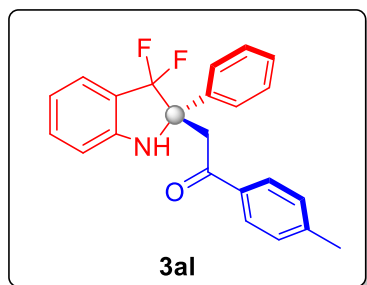

**Enantiomeric excess** is 92% determined by HPLC (Chiralpak AD-H, Hexane/Isopropanol 80/20, flow rate = 1.0 mL/min, 254 nm): major isomer: tr = 12.12 min; minor isomer: tr = 8.56 min.

$[\alpha]_D^{20} = +280$  (c = 0.2, CHCl<sub>3</sub>).

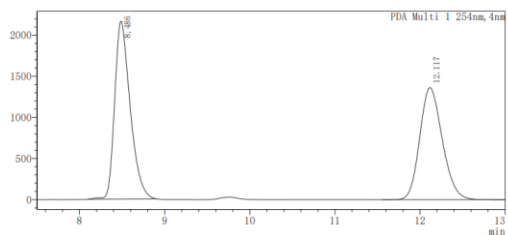

<Signal>

PDA Ch1 254nm

| Peak   | RetTime | Area     | Height  | Area%   |
|--------|---------|----------|---------|---------|
| 1      | 8.486   | 27318575 | 2162258 | 52.196  |
| 2      | 12.117  | 25019766 | 1361136 | 47.804  |
| Totals |         | 52338341 | 3523394 | 100.000 |

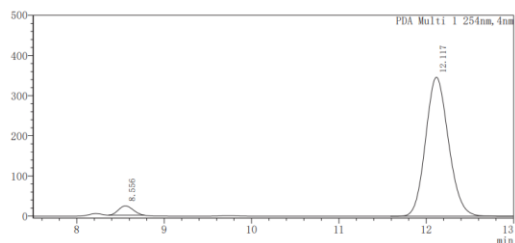

<Signal>

PDA Ch1 254nm

| Peak   | RetTime | Area    | Height | Area%   |
|--------|---------|---------|--------|---------|
| 1      | 8.556   | 266297  | 23151  | 4.052   |
| 2      | 12.117  | 6306055 | 346142 | 95.948  |
| Totals |         | 6572352 | 369293 | 100.000 |

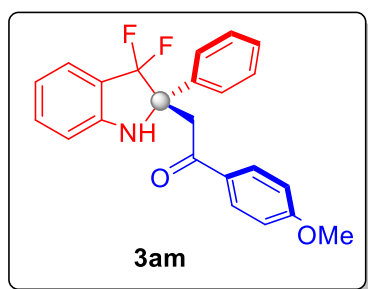

**Enantiomeric excess** is 90% determined by HPLC (Chiralpak AD-H, Hexane/Isopropanol 80/20, flow rate = 1.0 mL/min, 254 nm): major isomer: tr = 23.84 min; minor isomer: tr = 13.08 min.

$[\alpha]_D^{20} = +331$  (c = 0.2, CHCl<sub>3</sub>).

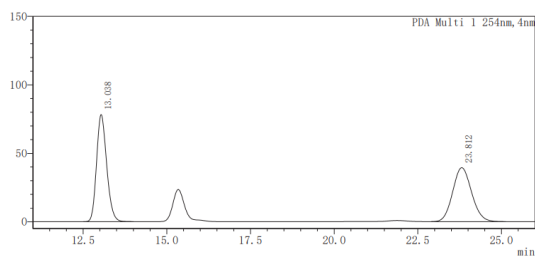

<Signal>

PDA Ch1 254nm

| Peak   | RetTime | Area    | Height | Area%   |
|--------|---------|---------|--------|---------|
| 1      | 13.038  | 1648062 | 78199  | 51.587  |
| 2      | 23.812  | 1546674 | 39434  | 48.413  |
| Totals |         | 3194736 | 117633 | 100.000 |

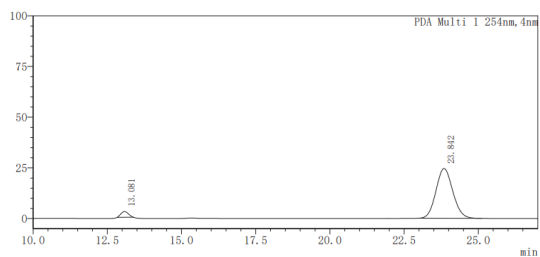

<Signal>

PDA Ch1 254nm

| Peak   | RetTime | Area    | Height | Area%   |
|--------|---------|---------|--------|---------|
| 1      | 13.081  | 50017   | 2854   | 4.914   |
| 2      | 23.842  | 967781  | 24590  | 95.086  |
| Totals |         | 1017798 | 27444  | 100.000 |



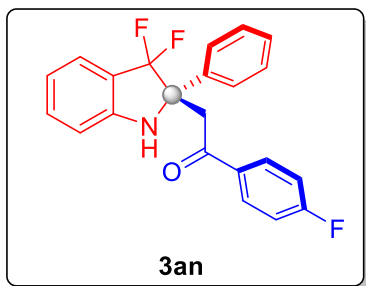

**Enantiomeric excess** is 94% determined by HPLC (Chiralpak AD-H, Hexane/Isopropanol 80/20,

flow rate = 1.0 mL/min, 254 nm): major isomer: tr = 13.03 min; minor isomer: tr = 9.18 min.

$[\alpha]_D^{20} = +250$  (c = 0.2, CHCl<sub>3</sub>).

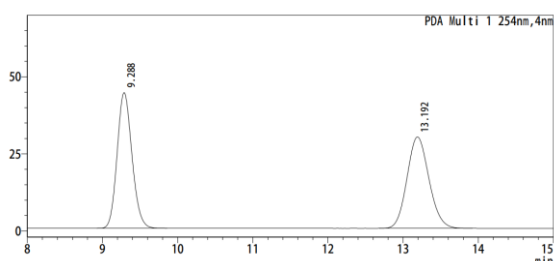

<Signal>

PDA Ch1 254nm

| Peak   | RetTime | Area    | Height | Area%   |
|--------|---------|---------|--------|---------|
| 1      | 9.288   | 602968  | 44021  | 50.059  |
| 2      | 13.192  | 601537  | 29654  | 49.941  |
| Totals |         | 1204506 | 73675  | 100.000 |

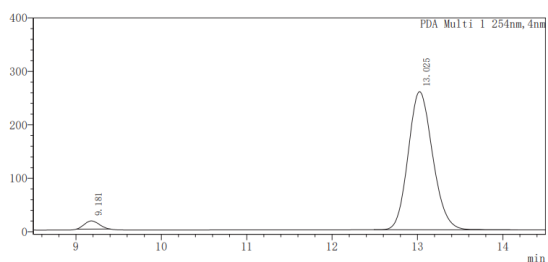

<Signal>

PDA Ch1 254nm

| Peak   | RetTime | Area    | Height | Area%   |
|--------|---------|---------|--------|---------|
| 1      | 9.181   | 183874  | 15360  | 3.439   |
| 2      | 13.025  | 5162368 | 258629 | 96.561  |
| Totals |         | 5346243 | 273988 | 100.000 |

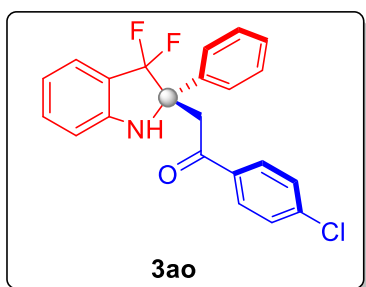

**Enantiomeric excess** is 94% determined by HPLC (Chiralpak AD-H, Hexane/Isopropanol 80/20,

flow rate = 1.0 mL/min, 254 nm): major isomer: tr = 15.17 min; minor isomer: tr = 10.71 min.  $[\alpha]_D^{20}$

= +321 (c = 0.2, CHCl<sub>3</sub>).

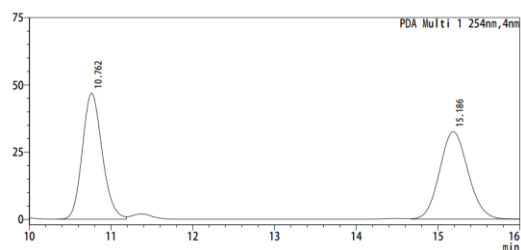

<Signal>

PDA Ch1 254nm

| Peak   | RetTime | Area    | Height | Area%   |
|--------|---------|---------|--------|---------|
| 1      | 10.762  | 790101  | 46796  | 50.123  |
| 2      | 15.186  | 786212  | 32531  | 49.877  |
| Totals |         | 1576313 | 79327  | 100.000 |

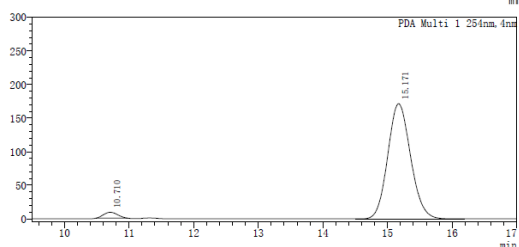

<Signal>

PDA Ch1 254nm

| Peak   | RetTime | Area    | Height | Area%   |
|--------|---------|---------|--------|---------|
| 1      | 10.710  | 128444  | 8703   | 2.959   |
| 2      | 15.171  | 4212776 | 171550 | 97.041  |
| Totals |         | 4341220 | 180253 | 100.000 |

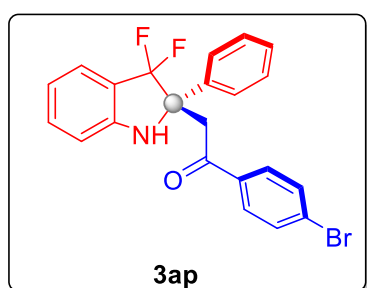

Enantiomeric excess is 92% determined by HPLC (Chiralpak AD-H, Hexane/Isopropanol 80/20, flow rate = 0.5 mL/min, 254 nm): major isomer: tr = 23.33 min; minor isomer: tr = 16.98 min.

$[\alpha]_D^{20} = +67$  (c = 0.2, CHCl<sub>3</sub>).

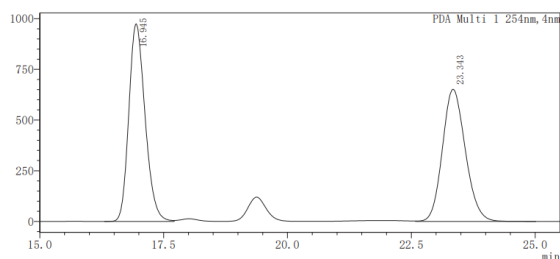

<Signal>

PDA Ch1 254nm

| Peak   | RetTime | Area     | Height  | Area%   |
|--------|---------|----------|---------|---------|
| 1      | 16.945  | 22271063 | 973945  | 51.478  |
| 2      | 23.343  | 20991818 | 651756  | 48.522  |
| Totals |         | 43262880 | 1625700 | 100.000 |

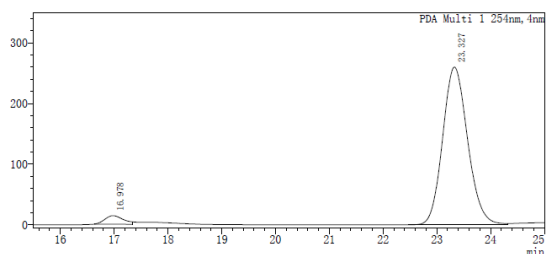

<Signal>

PDA Ch1 254nm

| Peak   | RetTime | Area    | Height | Area%   |
|--------|---------|---------|--------|---------|
| 1      | 16.978  | 334124  | 13998  | 3.823   |
| 2      | 23.327  | 8405363 | 259888 | 96.177  |
| Totals |         | 8739488 | 273886 | 100.000 |

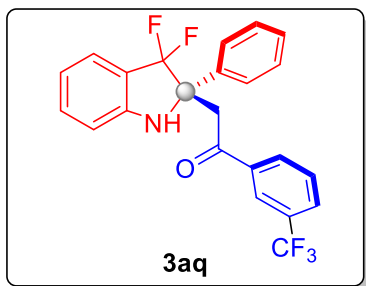

**Enantiomeric excess** is 92% determined by HPLC (Chiralpak AD-H, Hexane/Isopropanol 80/20,

flow rate = 1.0 mL/min, 254 nm): major isomer: tr = 6.45 min; minor isomer: tr = 5.97 min.

$[\alpha]_D^{20} = +291$  (c = 0.2, CHCl<sub>3</sub>).

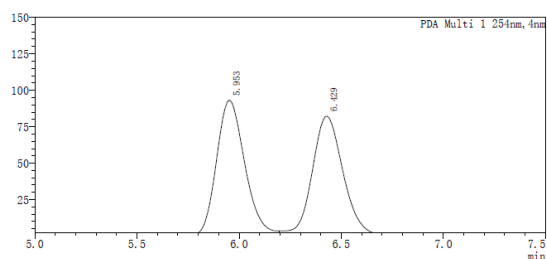

<Signal>

PDA Ch1 254nm

| Peak   | RetTime | Area    | Height | Area%   |
|--------|---------|---------|--------|---------|
| 1      | 5.953   | 901469  | 93181  | 50.899  |
| 2      | 6.429   | 869628  | 82165  | 49.101  |
| Totals |         | 1771096 | 175347 | 100.000 |

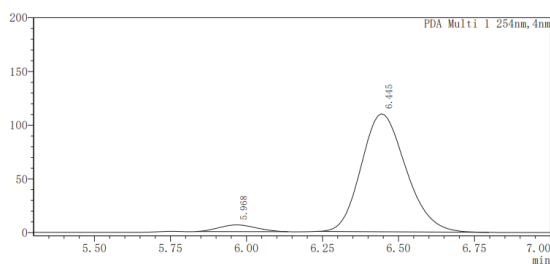

<Signal>

PDA Ch1 254nm

| Peak   | RetTime | Area    | Height | Area%   |
|--------|---------|---------|--------|---------|
| 1      | 5.968   | 52559   | 6164   | 4.469   |
| 2      | 6.445   | 1123409 | 109773 | 95.531  |
| Totals |         | 1175968 | 115937 | 100.000 |

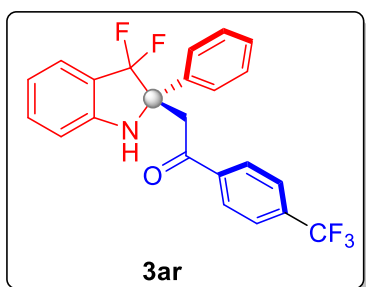

**Enantiomeric excess** is 96% determined by HPLC (Chiralpak AD-H, Hexane/Isopropanol 80/20,

flow rate = 1.0 mL/min, 254 nm): major isomer: tr = 12.76 min; minor isomer: tr = 10.25 min.

$[\alpha]_D^{20} = +231$  (c = 0.2, CHCl<sub>3</sub>).

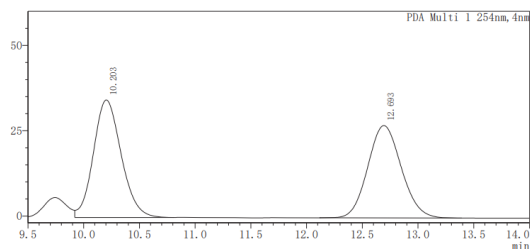

<Signal>

PDA Ch1 254nm

| Peak   | RetTime | Area    | Height | Area%   |
|--------|---------|---------|--------|---------|
| 1      | 10.203  | 596859  | 34422  | 51.281  |
| 2      | 12.693  | 567044  | 27094  | 48.719  |
| Totals |         | 1163903 | 61516  | 100.000 |

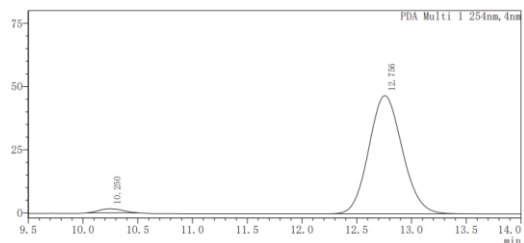

<Signal>

PDA Ch1 254nm

| Peak   | RetTime | Area    | Height | Area%   |
|--------|---------|---------|--------|---------|
| 1      | 10.250  | 24978   | 1688   | 2.456   |
| 2      | 12.756  | 992108  | 46677  | 97.544  |
| Totals |         | 1017086 | 48364  | 100.000 |

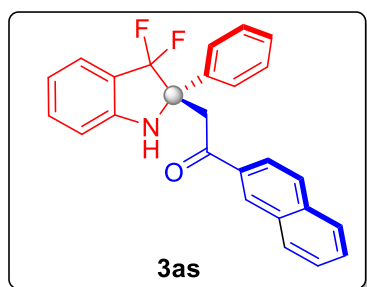

**Enantiomeric excess** is 90% determined by HPLC (Chiralpak AD-H, Hexane/Isopropanol 80/20, flow rate = 0.5 mL/min, 254 nm): major isomer: tr = 31.00 min; minor isomer: tr = 19.67 min.

$[\alpha]_D^{20} = +335$  (c = 0.2, CHCl<sub>3</sub>).

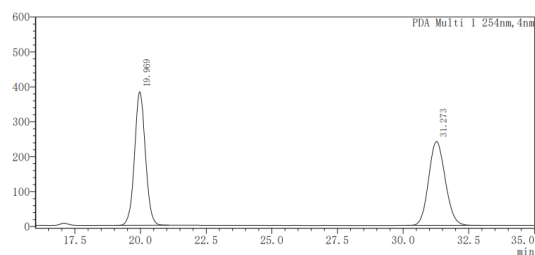

<Signal>

PDA Ch1 254nm

| Peak   | RetTime | Area     | Height | Area%   |
|--------|---------|----------|--------|---------|
| 1      | 19.969  | 10992209 | 382119 | 50.998  |
| 2      | 31.273  | 10561931 | 240137 | 49.002  |
| Totals |         | 21554140 | 622256 | 100.000 |

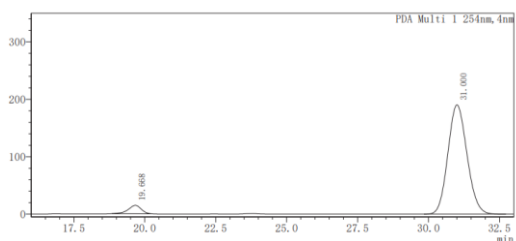

<Signal>

PDA Ch1 254nm

| Peak   | RetTime | Area    | Height | Area%   |
|--------|---------|---------|--------|---------|
| 1      | 19.668  | 467982  | 14835  | 4.990   |
| 2      | 31.000  | 8909478 | 190384 | 95.010  |
| Totals |         | 9377460 | 205218 | 100.000 |

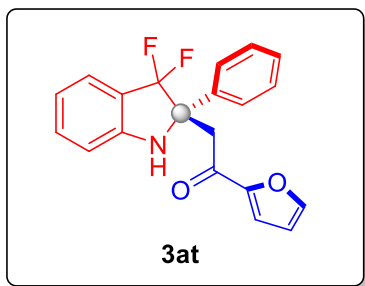

**Enantiomeric excess** is 70% determined by HPLC (Chiralpak AD-H, Hexane/Isopropanol 80/20, flow rate = 0.5 mL/min, 254 nm): major isomer: tr = 22.69 min; minor isomer: tr = 16.97 min.

$[\alpha]_D^{20} = +234$  (c = 0.2, CHCl<sub>3</sub>).

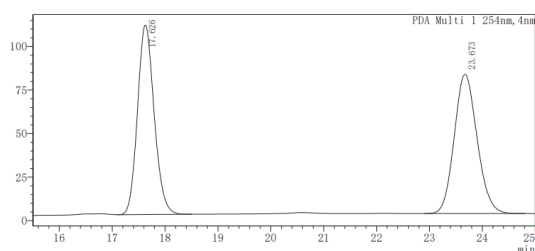

<Signal>

PDA Ch1 254nm

| Peak   | RetTime | Area    | Height | Area%   |
|--------|---------|---------|--------|---------|
| 1      | 17.626  | 2388934 | 108728 | 49.854  |
| 2      | 23.673  | 2402968 | 79880  | 50.146  |
| Totals |         | 4791902 | 188608 | 100.000 |

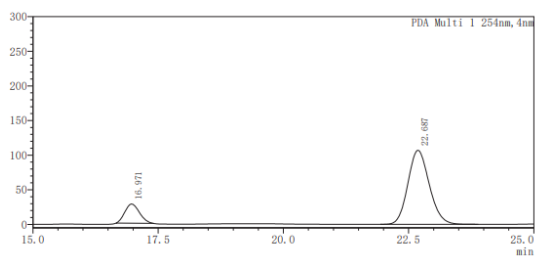

<Signal>

PDA Ch1 254nm

| Peak   | RetTime | Area    | Height | Area%   |
|--------|---------|---------|--------|---------|
| 1      | 16.971  | 559674  | 27738  | 15.024  |
| 2      | 22.687  | 3165537 | 106838 | 84.976  |
| Totals |         | 3725211 | 134575 | 100.000 |

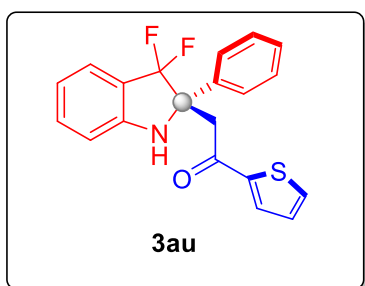

**Enantiomeric excess** is 86% determined by HPLC (Chiralpak AD-H, Hexane/Isopropanol 80/20, flow rate = 1.0 mL/min, 254 nm): major isomer: tr = 13.65 min; minor isomer: tr = 9.19 min.

$[\alpha]_D^{20} = +228$  (c = 0.2, CHCl<sub>3</sub>).

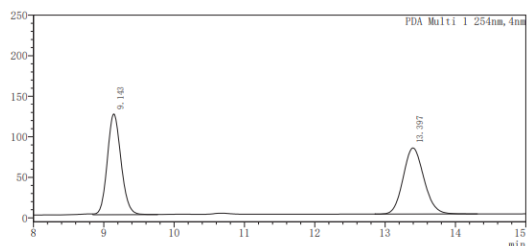

<Signal>

PDA Ch1 254nm

| Peak   | RetTime | Area    | Height | Area%   |
|--------|---------|---------|--------|---------|
| 1      | 9.143   | 1682180 | 124282 | 50.165  |
| 2      | 13.397  | 1671124 | 81548  | 49.835  |
| Totals |         | 3353304 | 205830 | 100.000 |

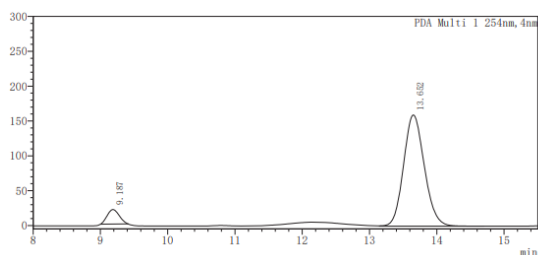

<Signal>

PDA Ch1 254nm

| Peak   | RetTime | Area    | Height | Area%   |
|--------|---------|---------|--------|---------|
| 1      | 9.187   | 257658  | 20807  | 7.014   |
| 2      | 13.652  | 3416058 | 159518 | 92.986  |
| Totals |         | 3673716 | 180324 | 100.000 |

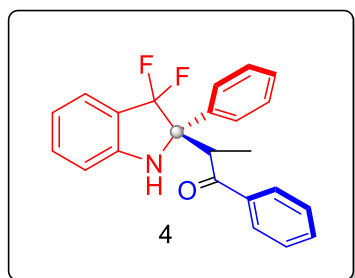

**Enantiomeric excess** is 94% determined by HPLC (Chiralpak AD-H, Hexane/Isopropanol 80/20, flow rate = 1.0 mL/min, 254 nm): major isomer: tr = 7.35 min; minor isomer: tr = 5.10 min.

$[\alpha]^{20}_D = +272$  (c = 0.2, CHCl<sub>3</sub>).

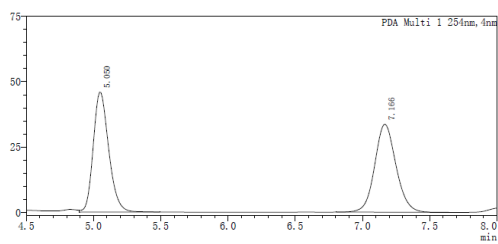

<Signal>

PDA Ch1 254nm

| Peak   | RetTime | Area   | Height | Area%   |
|--------|---------|--------|--------|---------|
| 1      | 5.050   | 365904 | 45809  | 49.644  |
| 2      | 7.166   | 371150 | 33595  | 50.356  |
| Totals |         | 737054 | 79404  | 100.000 |

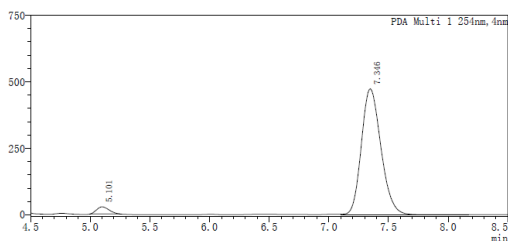

<Signal>

PDA Ch1 254nm

| Peak   | RetTime | Area    | Height | Area%   |
|--------|---------|---------|--------|---------|
| 1      | 5.101   | 190599  | 26516  | 3.404   |
| 2      | 7.346   | 5409358 | 473723 | 96.596  |
| Totals |         | 5599957 | 500239 | 100.000 |

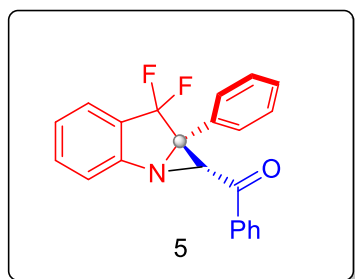

**Enantiomeric excess** is 94% determined by HPLC (Chiralpak AD-H, Hexane/Isopropanol 80/20, flow rate = 1.0 mL/min, 254 nm): major isomer: tr = 9.89 min; minor isomer: tr = 7.22 min.

$[\alpha]^{20}_D = +214$  (c = 0.2, CHCl<sub>3</sub>).

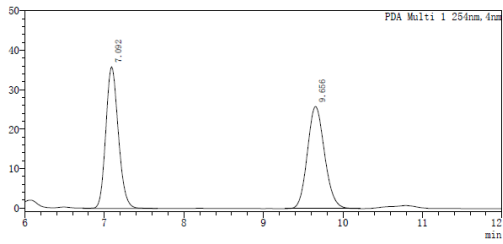

<Signal>

PDA Ch1 254nm

| Peak   | RetTime | Area   | Height | Area%   |
|--------|---------|--------|--------|---------|
| 1      | 7.092   | 393475 | 35869  | 50.306  |
| 2      | 9.656   | 388691 | 25880  | 49.694  |
| Totals |         | 782166 | 61750  | 100.000 |

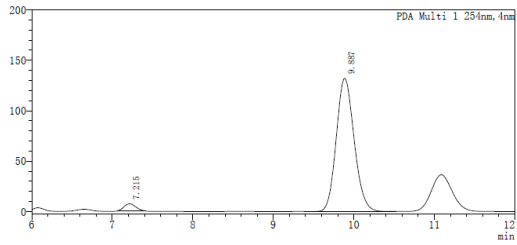

<Signal>

PDA Ch1 254nm

| Peak   | RetTime | Area    | Height | Area%   |
|--------|---------|---------|--------|---------|
| 1      | 7.215   | 72212   | 7133   | 3.413   |
| 2      | 9.887   | 2043423 | 132138 | 96.587  |
| Totals |         | 2115636 | 139271 | 100.000 |

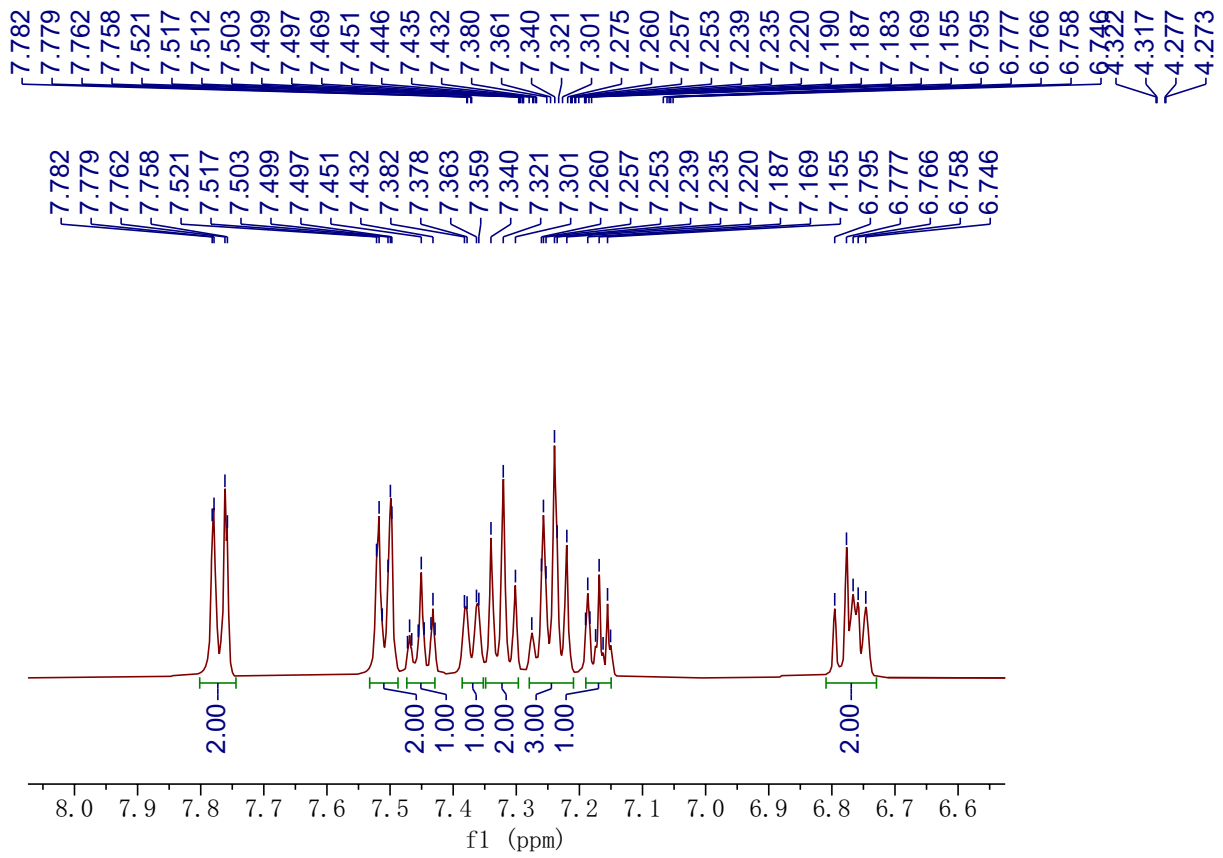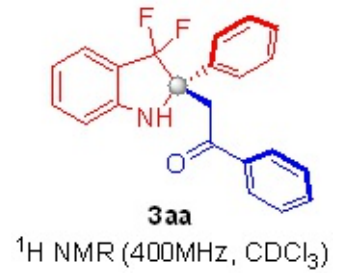

3.263  
3.218

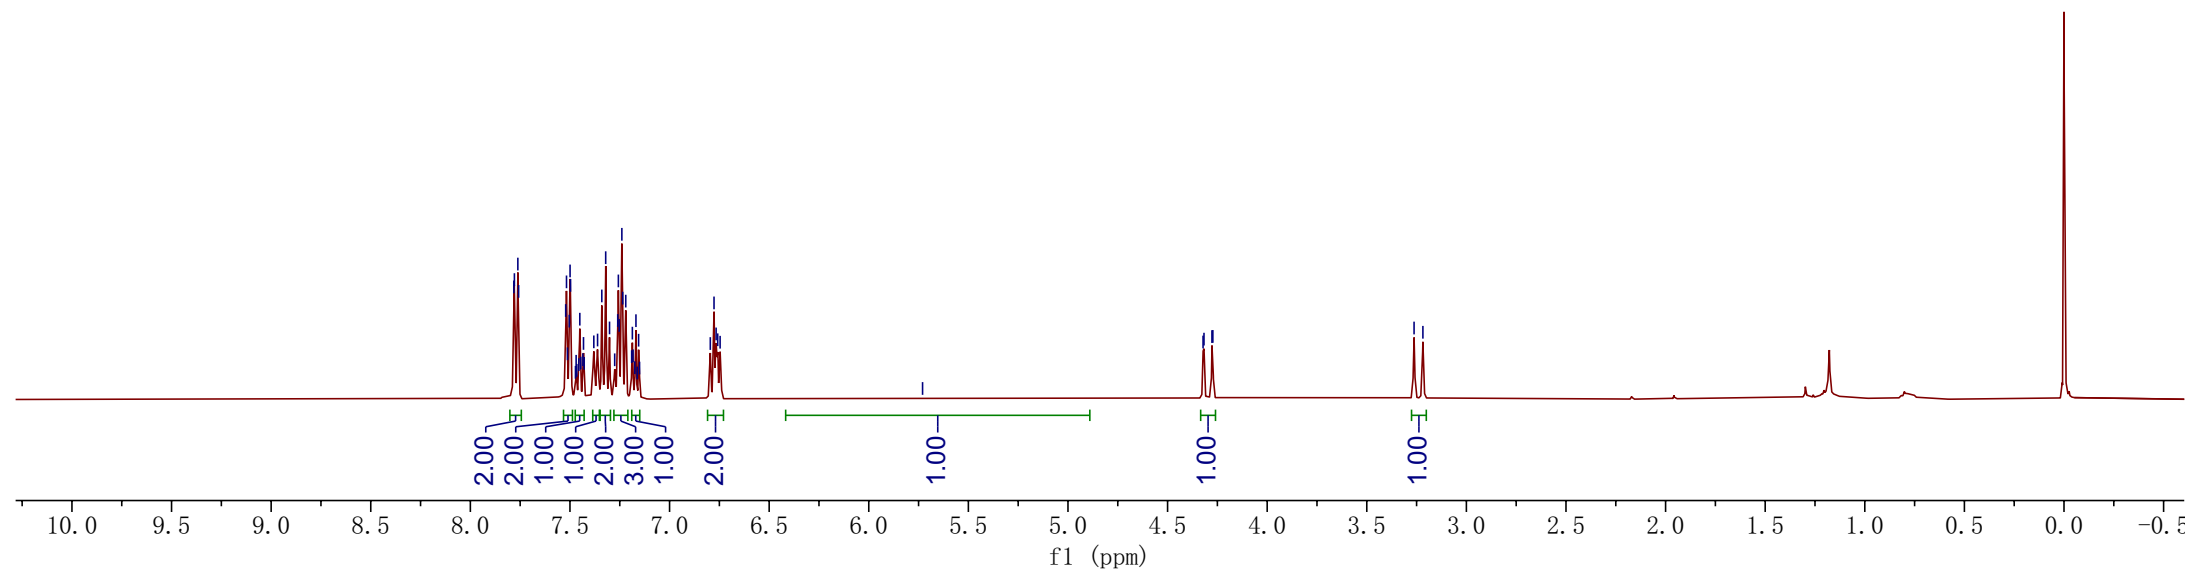



198.29  
198.28

149.67  
149.61  
149.59  
149.53  
137.41  
137.35  
136.79  
133.65  
133.00  
129.21  
128.63  
128.22  
127.96  
127.70  
126.72  
126.50  
124.33  
124.23  
120.31  
120.06  
120.05  
119.81  
119.23  
111.21

77.32  
77.00  
76.68  
72.04  
71.82  
71.76  
71.55

42.08  
42.05  
41.98  
41.96

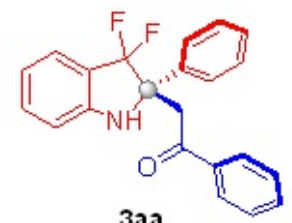

<sup>13</sup>C NMR (100MHz, CDCl<sub>3</sub>)

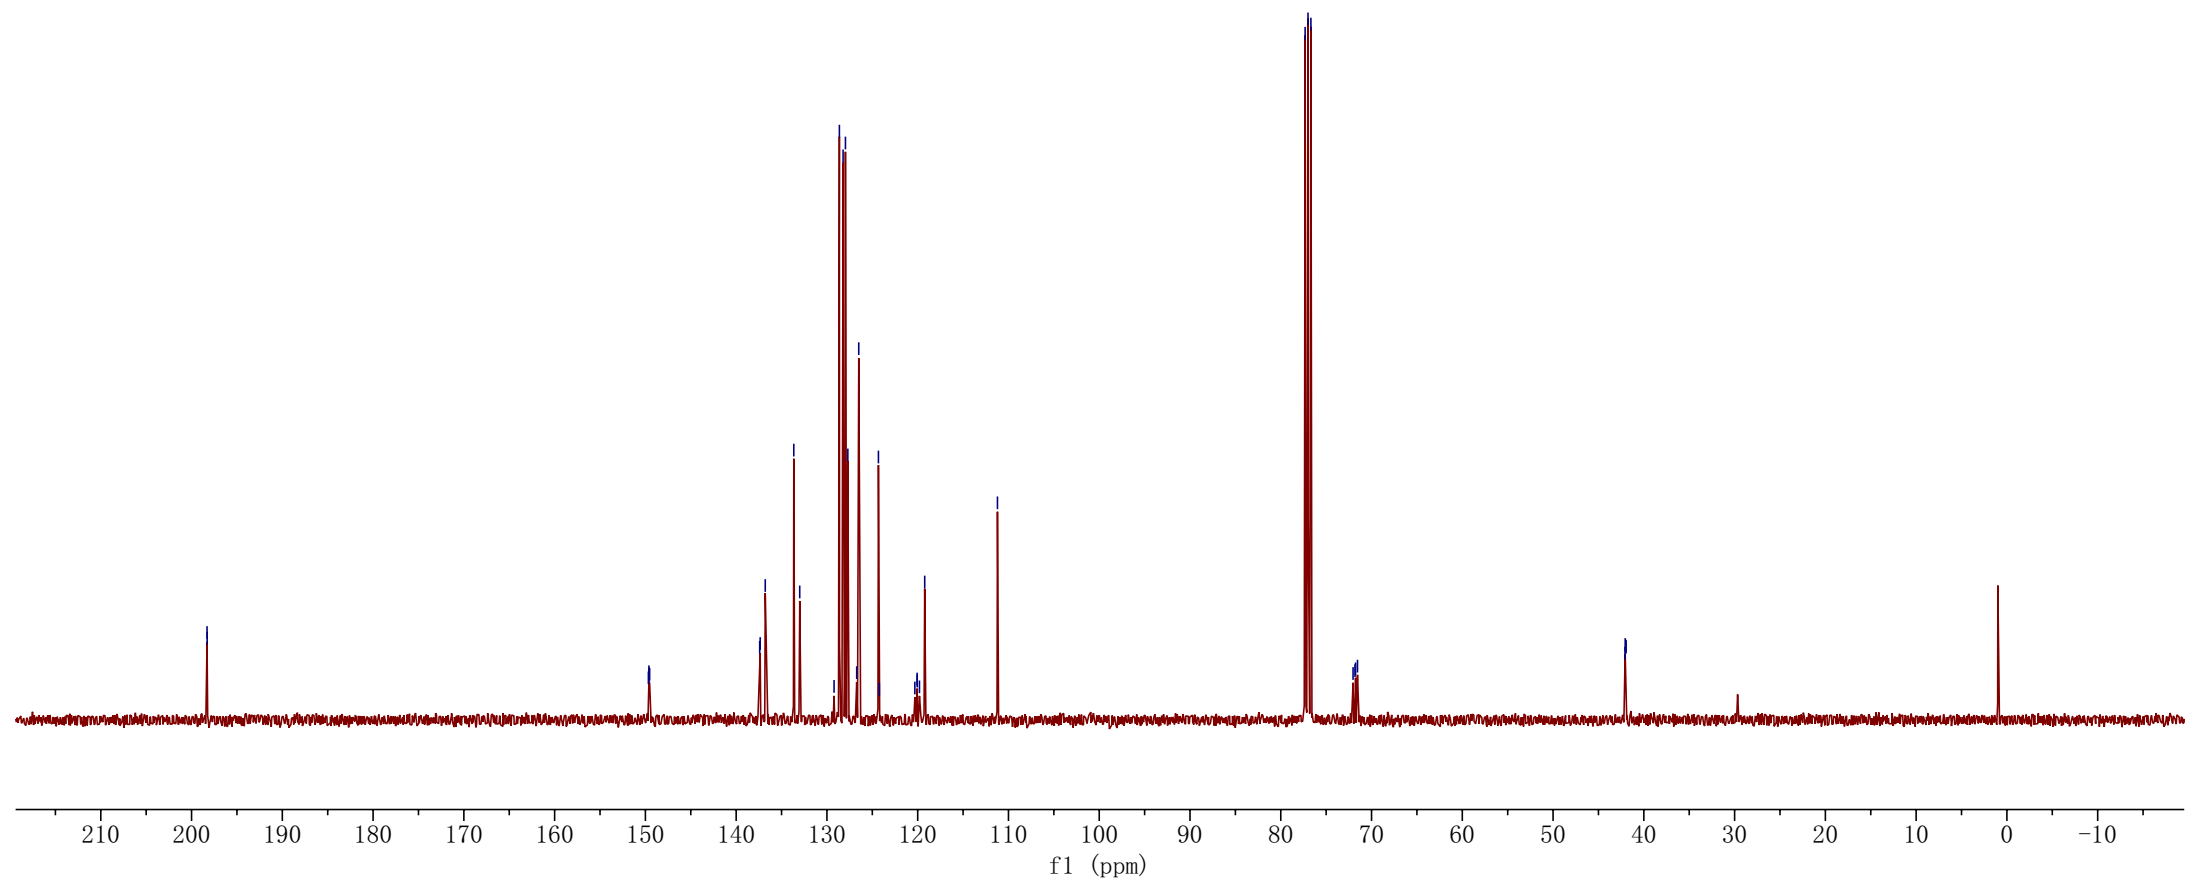

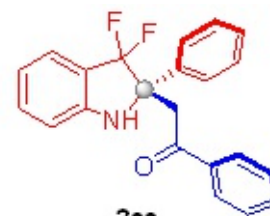

<sup>19</sup>F NMR (376MHz, CDCl<sub>3</sub>)

-84.97  
-85.63

-106.99  
-107.65

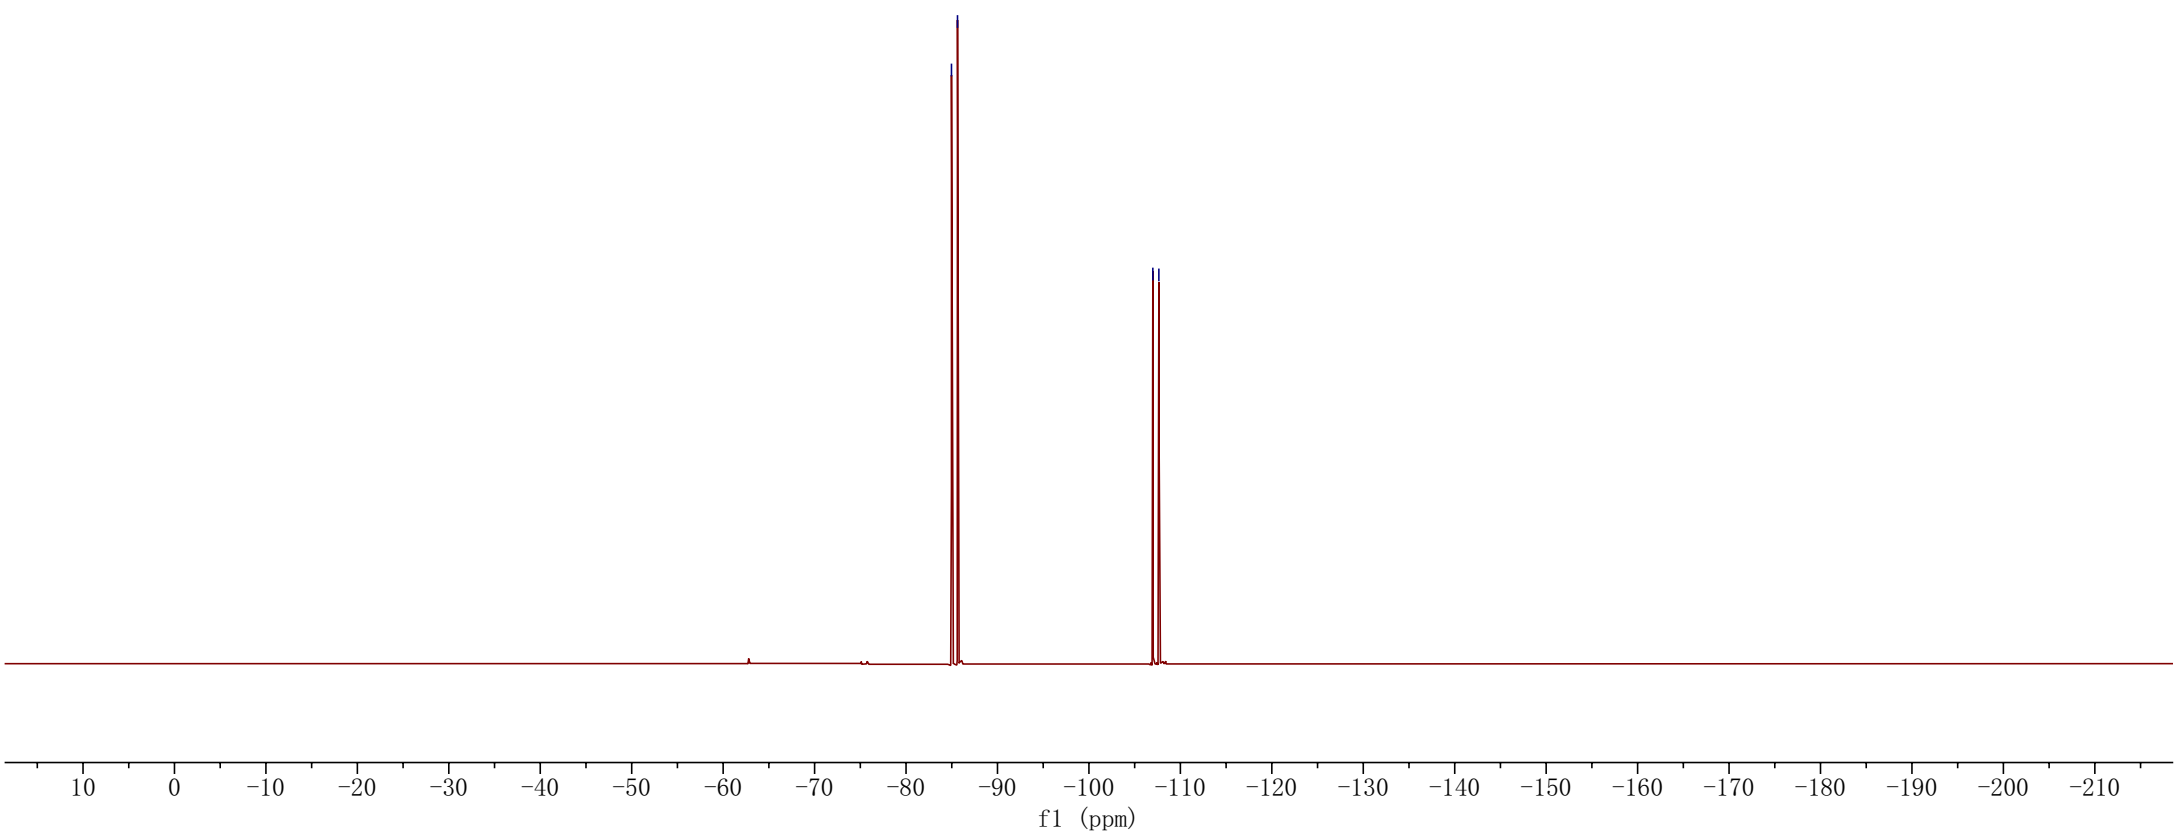

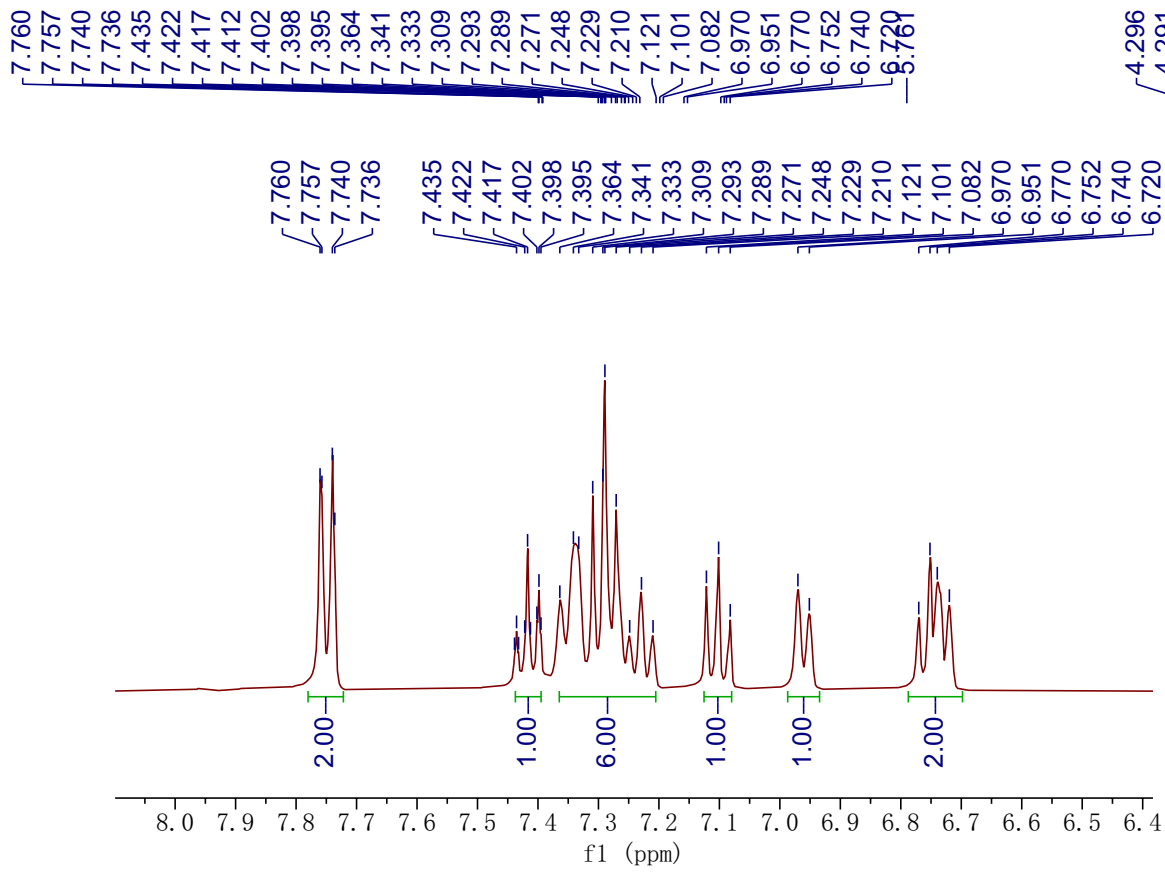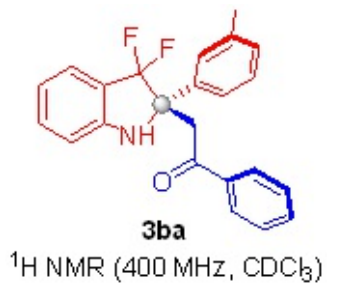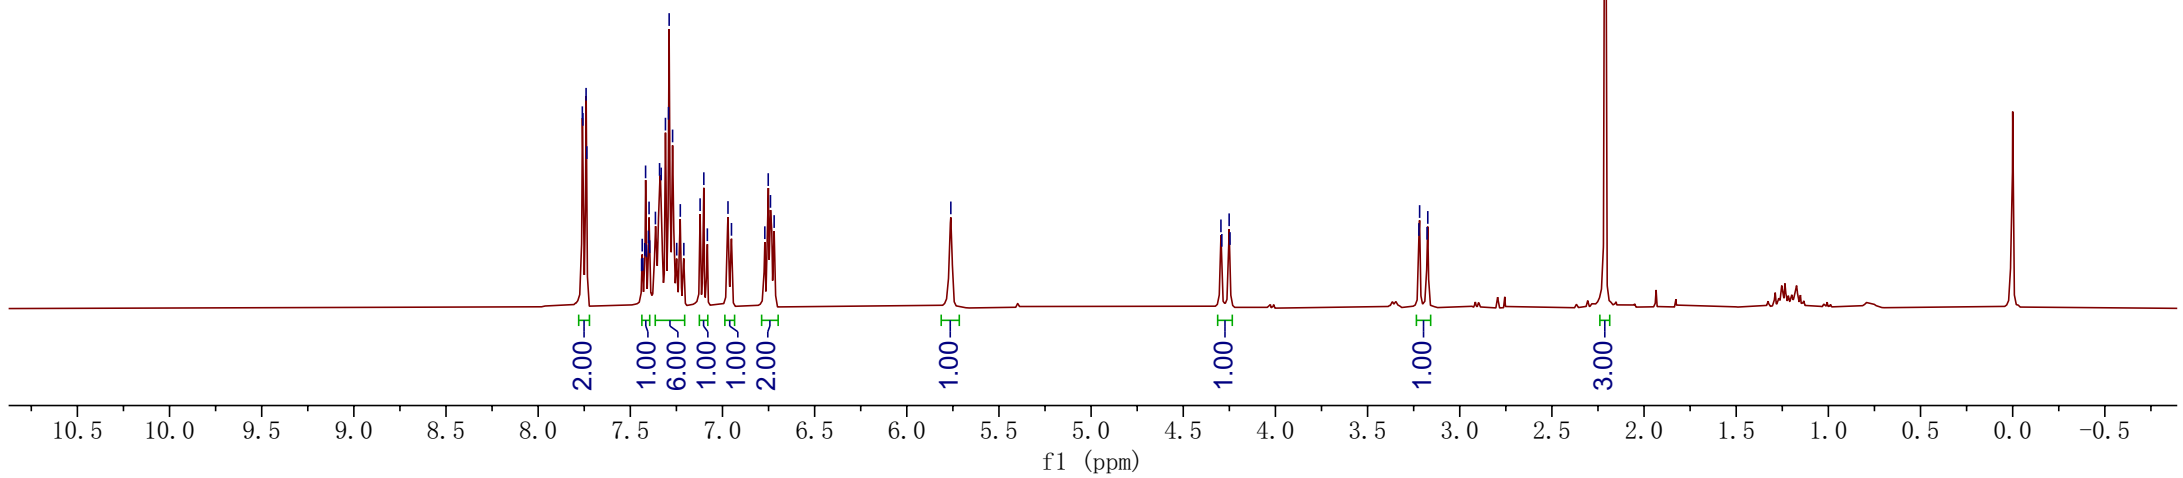

198.34  
198.32  
149.66  
149.60  
149.58  
149.53  
137.70  
137.24  
137.19  
136.86  
133.56  
132.95  
129.21  
128.57  
128.51  
128.05  
127.94  
127.29  
126.72  
124.28  
124.22  
123.47  
120.34  
120.09  
119.83  
119.15  
111.19

77.32  
77.00  
76.68  
72.01  
71.80  
71.74  
71.53

42.04  
42.02  
41.95  
41.92

21.55

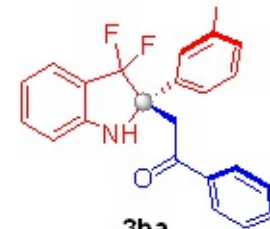

<sup>13</sup>C NMR (100 MHz, CDCl<sub>3</sub>)

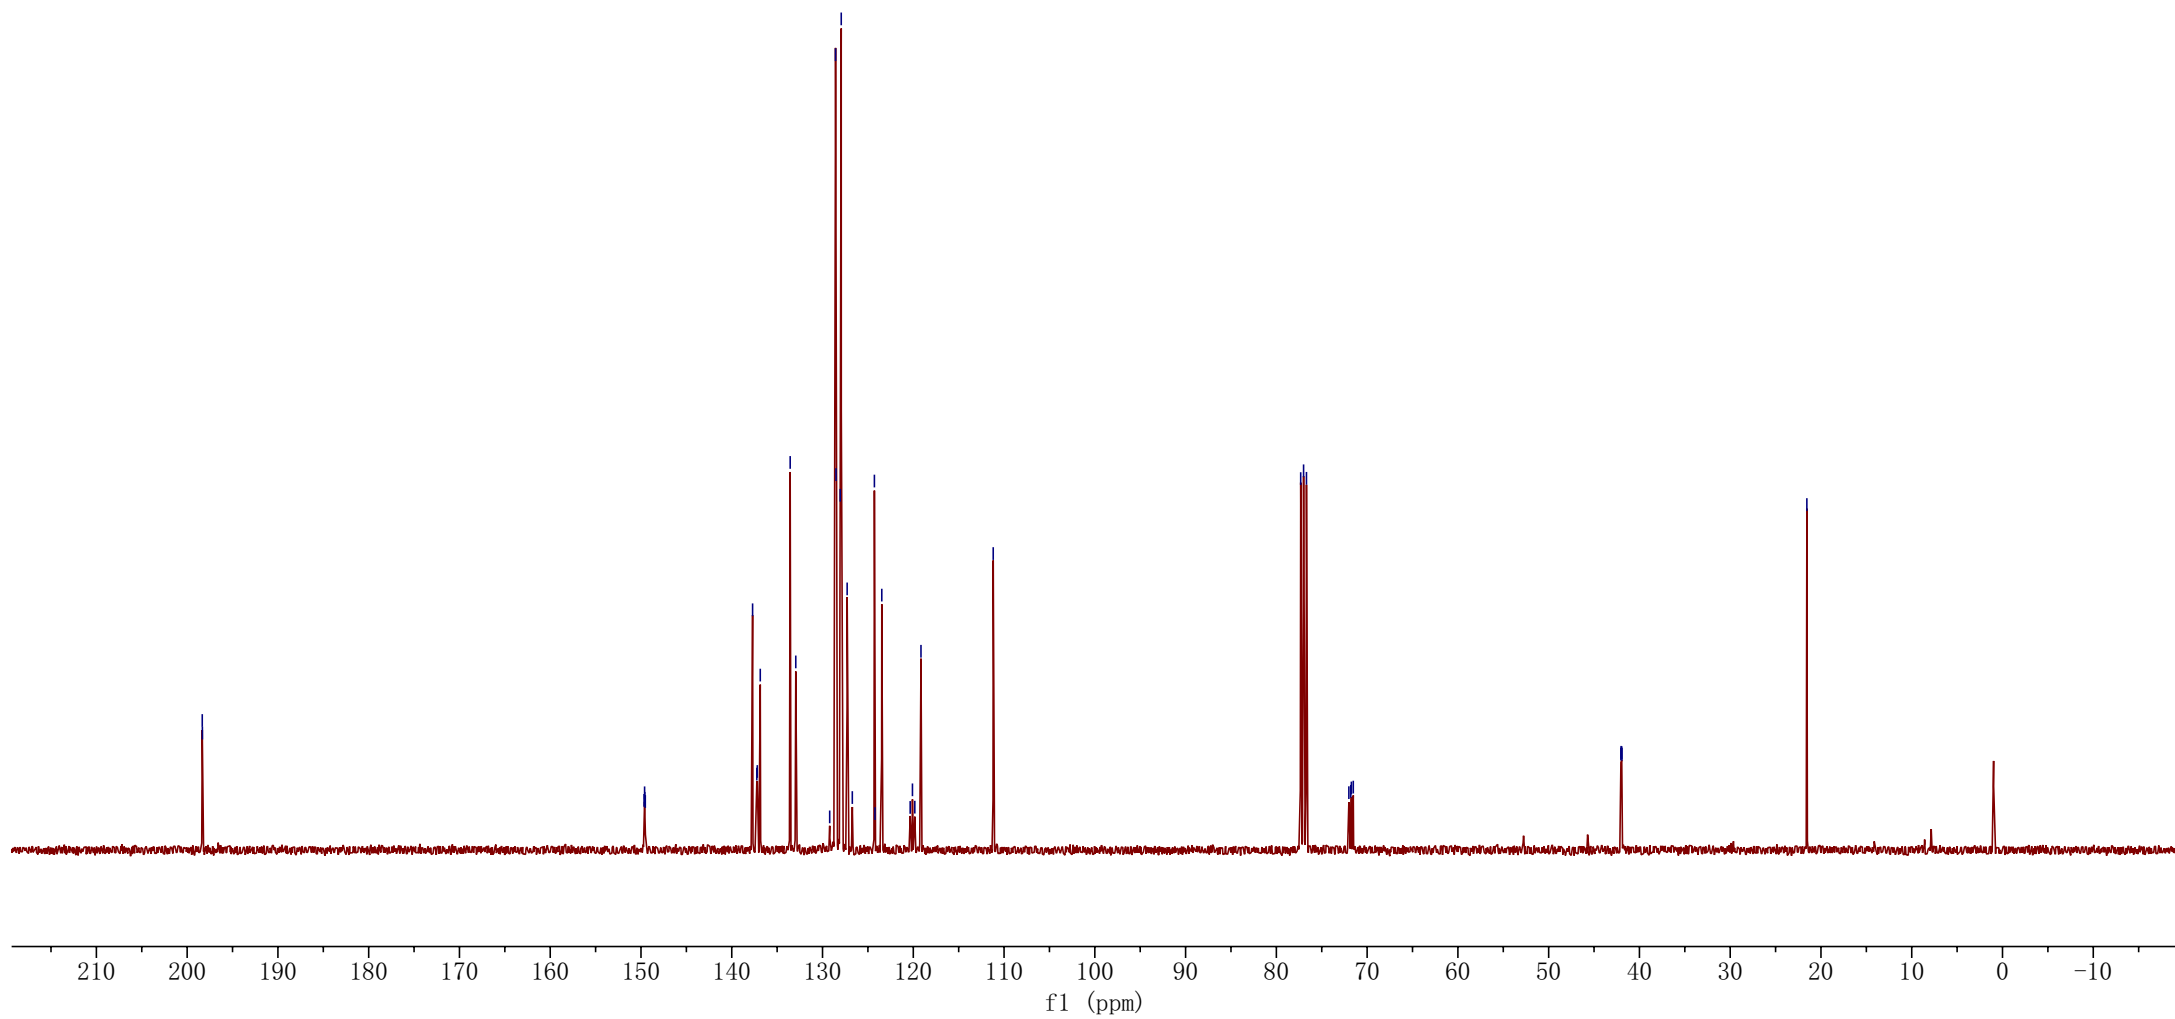

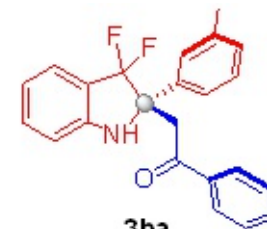

**3ba**  
<sup>19</sup>F NMR (376 MHz, CDCl<sub>3</sub>)

--84.60  
--84.62  
--85.26  
--85.28

--107.39  
--107.42  
--108.05  
--108.08

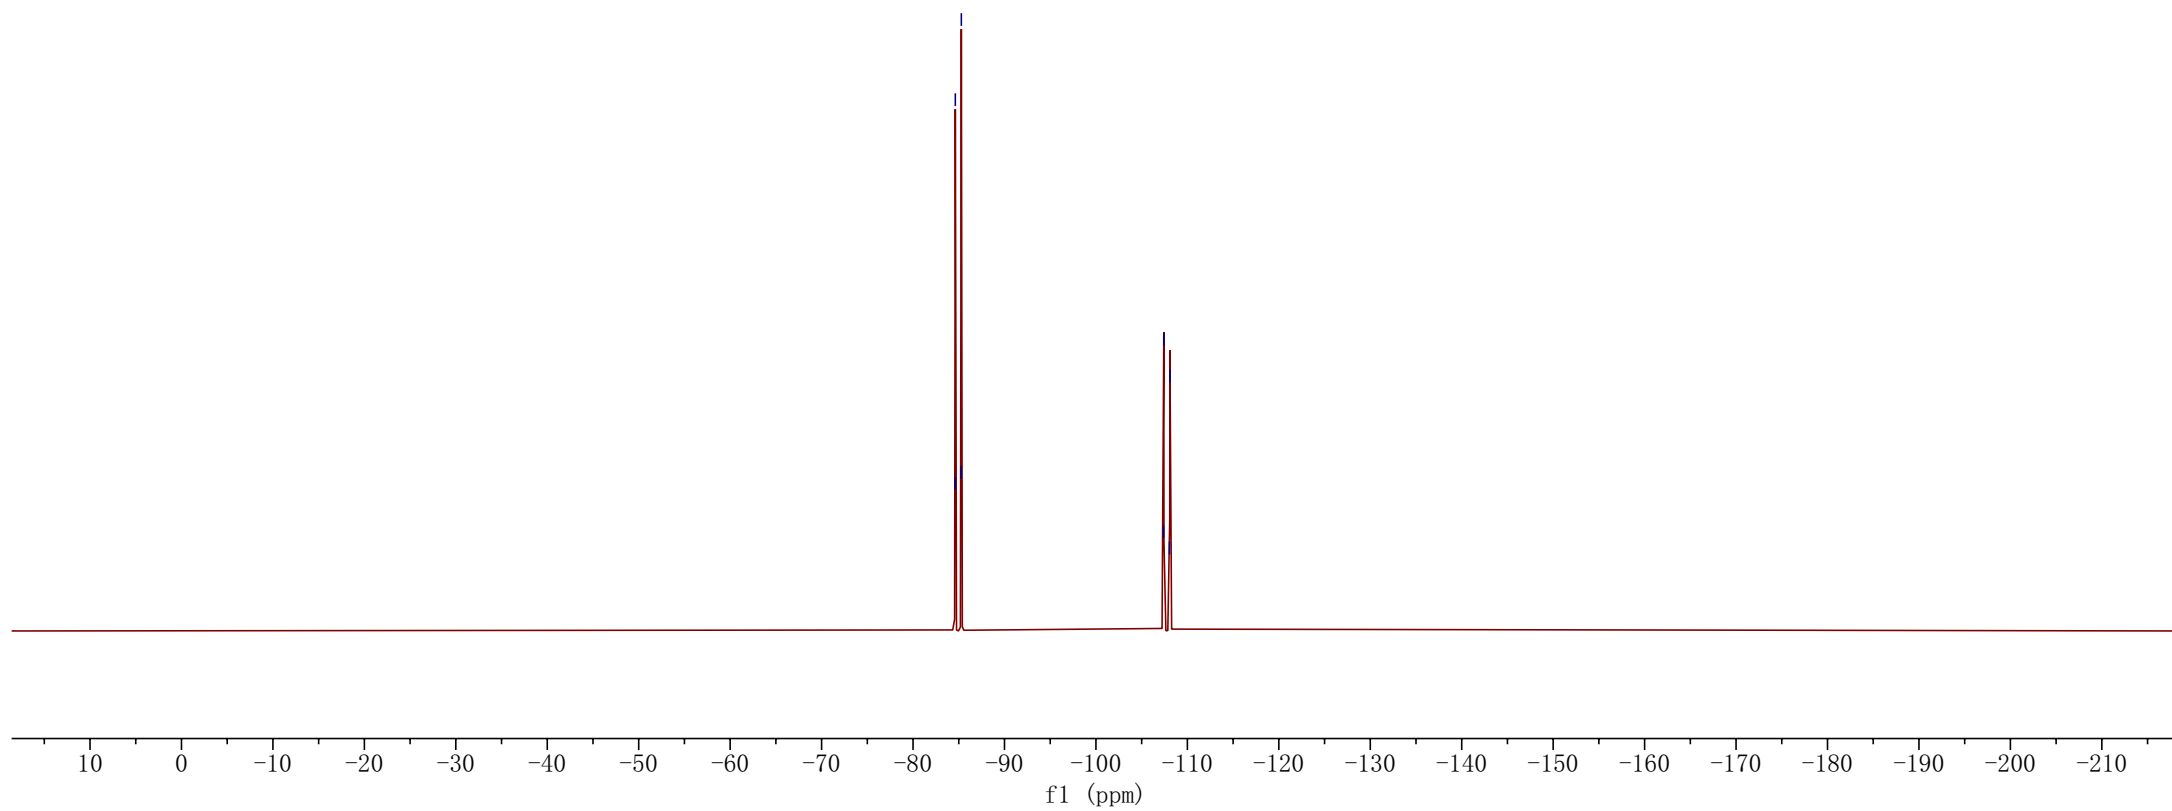

7.790  
7.787  
7.769  
7.766  
7.454  
7.438  
7.435  
7.378  
7.359  
7.345  
7.324  
7.306  
7.253  
7.166  
7.163  
7.146  
7.126  
7.110  
7.105  
7.099  
7.072  
7.069  
7.066  
7.053  
7.049  
6.794  
6.776  
6.761  
6.758  
6.761  
6.742  
6.758  
6.742  
6.723  
6.720  
6.720  
6.717  
6.714  
6.714  
6.703  
6.700  
6.700  
6.696  
6.696  
4.305  
4.305  
4.265  
4.260  
— 3.673  
3.229  
3.185

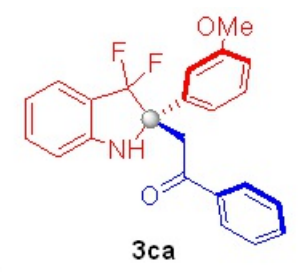

<sup>1</sup>H NMR (400 MHz, CDCl<sub>3</sub>)

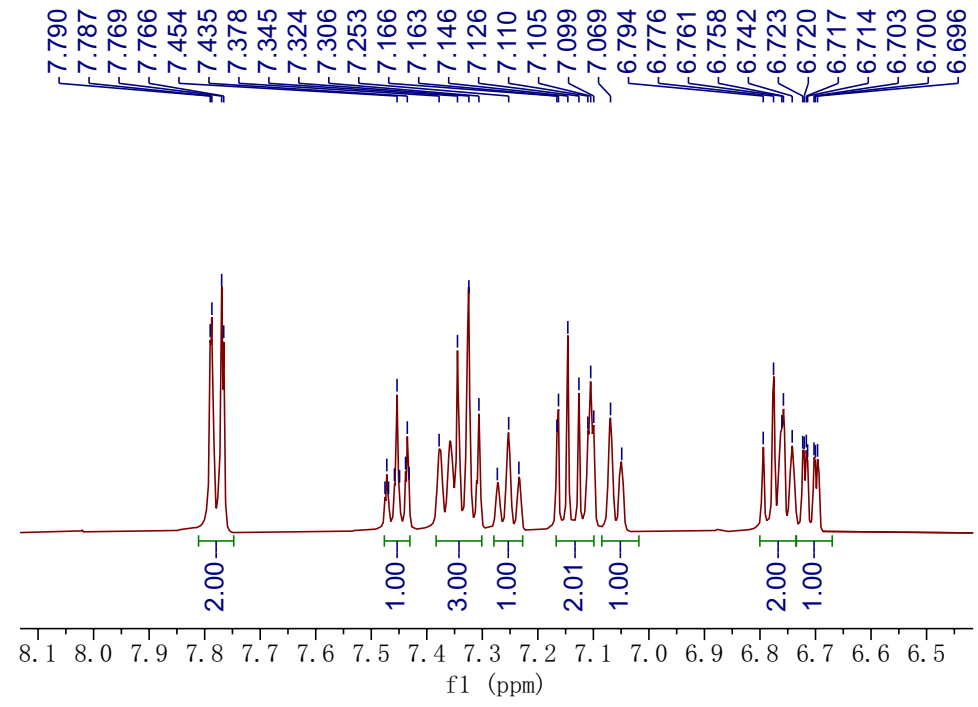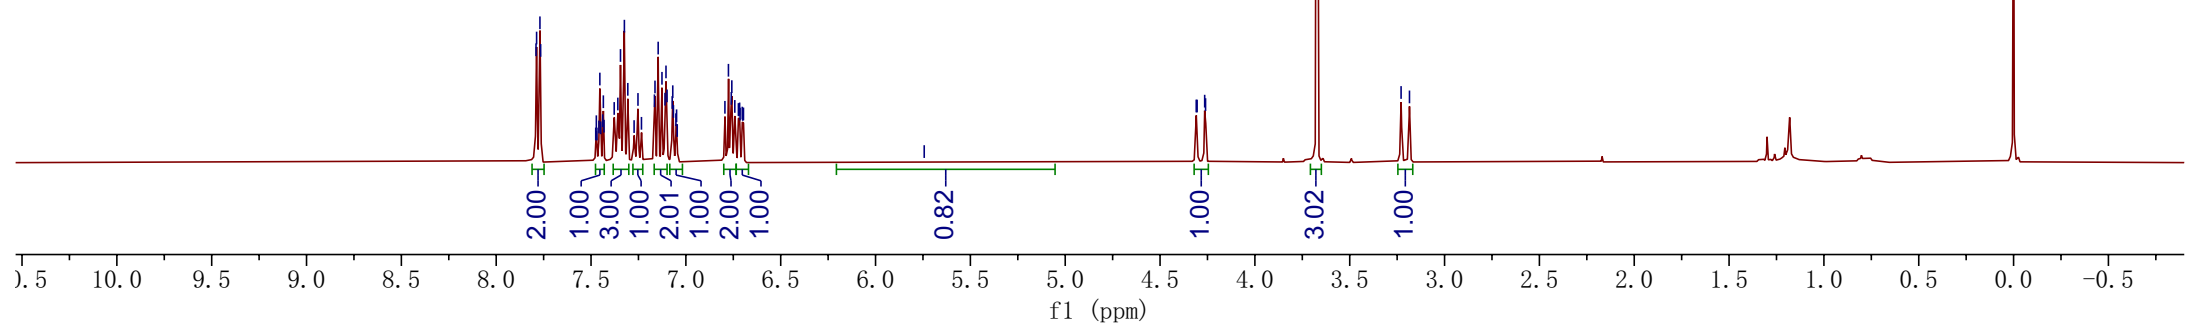

198.28  
198.26

159.50  
149.67  
149.61  
149.58  
149.53  
139.10  
139.04  
136.86  
133.63  
133.00  
129.19  
129.15  
128.63  
127.98  
126.65  
124.32  
124.15  
120.34  
120.09  
120.08  
119.84  
119.24  
118.79  
112.99  
112.88  
111.23  
77.32  
77.00  
76.68  
72.07  
71.86  
71.80  
71.59  
55.11  
42.02  
42.00  
41.93  
41.90

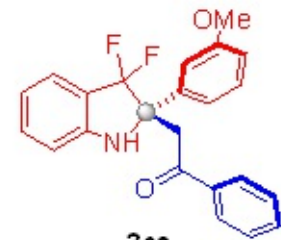

<sup>13</sup>C NMR (100 MHz, CDCl<sub>3</sub>)

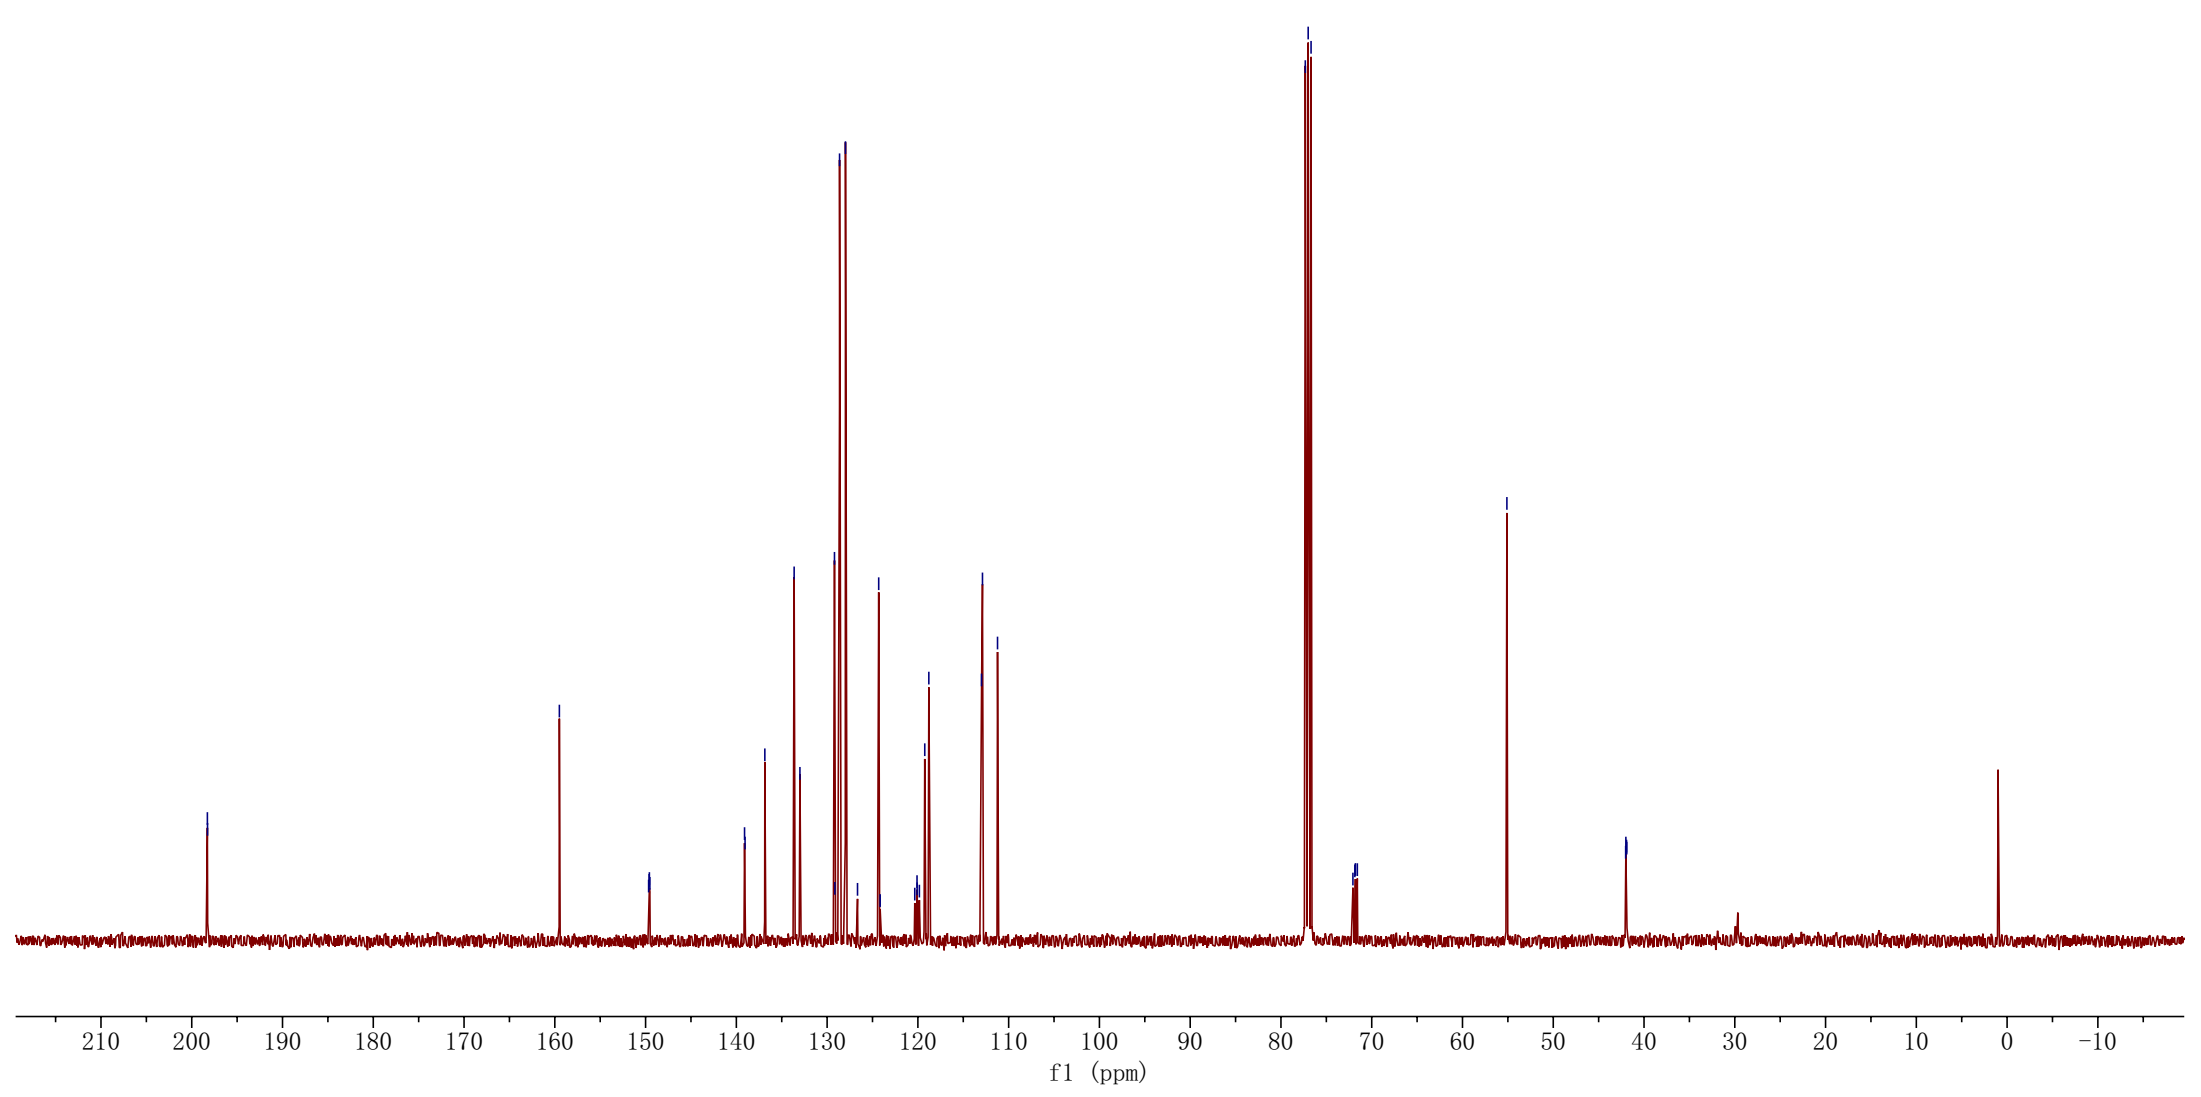

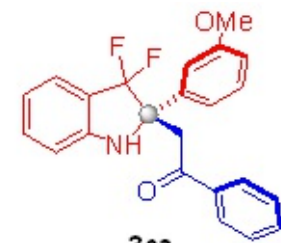

<sup>19</sup>F NMR (376 MHz, CDCl<sub>3</sub>)

-91.73  
-92.39

-115.84  
-116.50

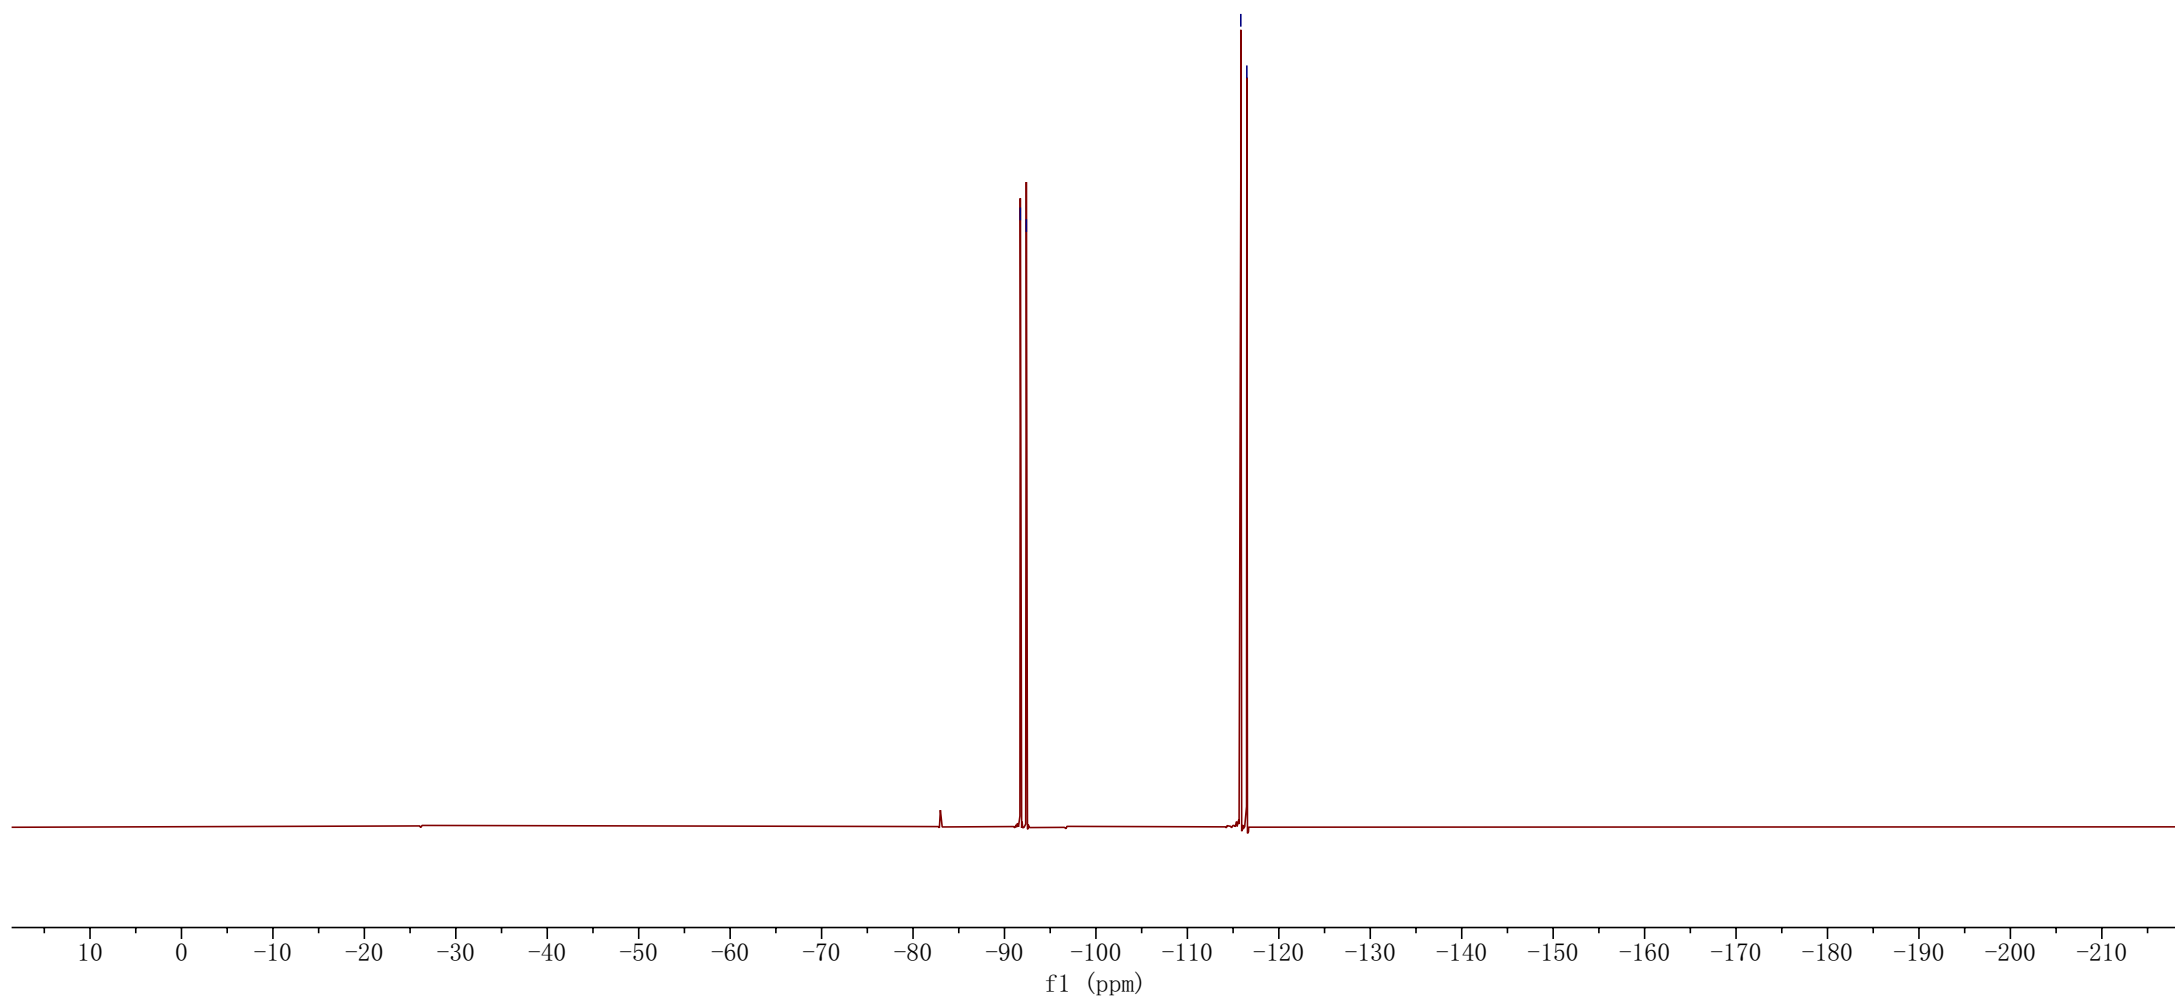



7.897  
7.894  
7.876  
7.872  
7.587  
7.573  
7.569  
7.564  
7.553  
7.550  
7.547  
7.506  
7.487  
7.455  
7.435  
7.416  
7.402  
7.380  
7.359  
7.331  
7.316  
7.311  
7.297  
7.291  
7.006  
7.004  
7.000  
6.997  
6.986  
6.983  
6.980  
6.977  
6.930  
6.911  
6.892  
6.911  
6.892  
6.875  
6.875  
6.855  
5.874  
4.395  
4.391  
4.351  
4.346  
3.393  
3.390  
3.348

7.897  
7.894  
7.876  
7.872  
7.587  
7.569  
7.564  
7.553  
7.550  
7.547  
7.506  
7.487  
7.455  
7.435  
7.416  
7.402  
7.380  
7.359  
7.331  
7.316  
7.311  
7.297  
7.291  
7.006  
7.004  
7.000  
6.997  
6.986  
6.983  
6.980  
6.977  
6.930  
6.911  
6.892  
6.875  
6.855

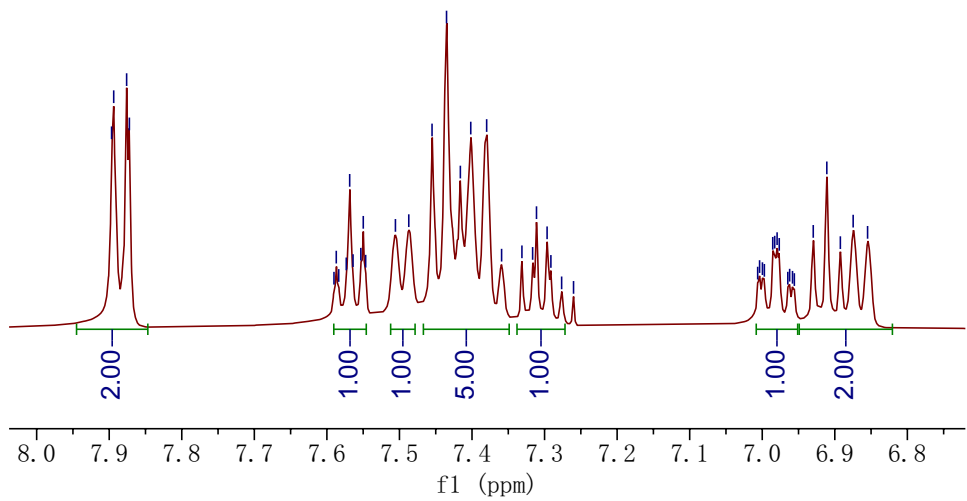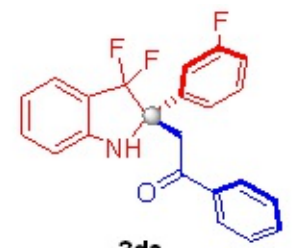

<sup>1</sup>H NMR (400 MHz, CDCl<sub>3</sub>)

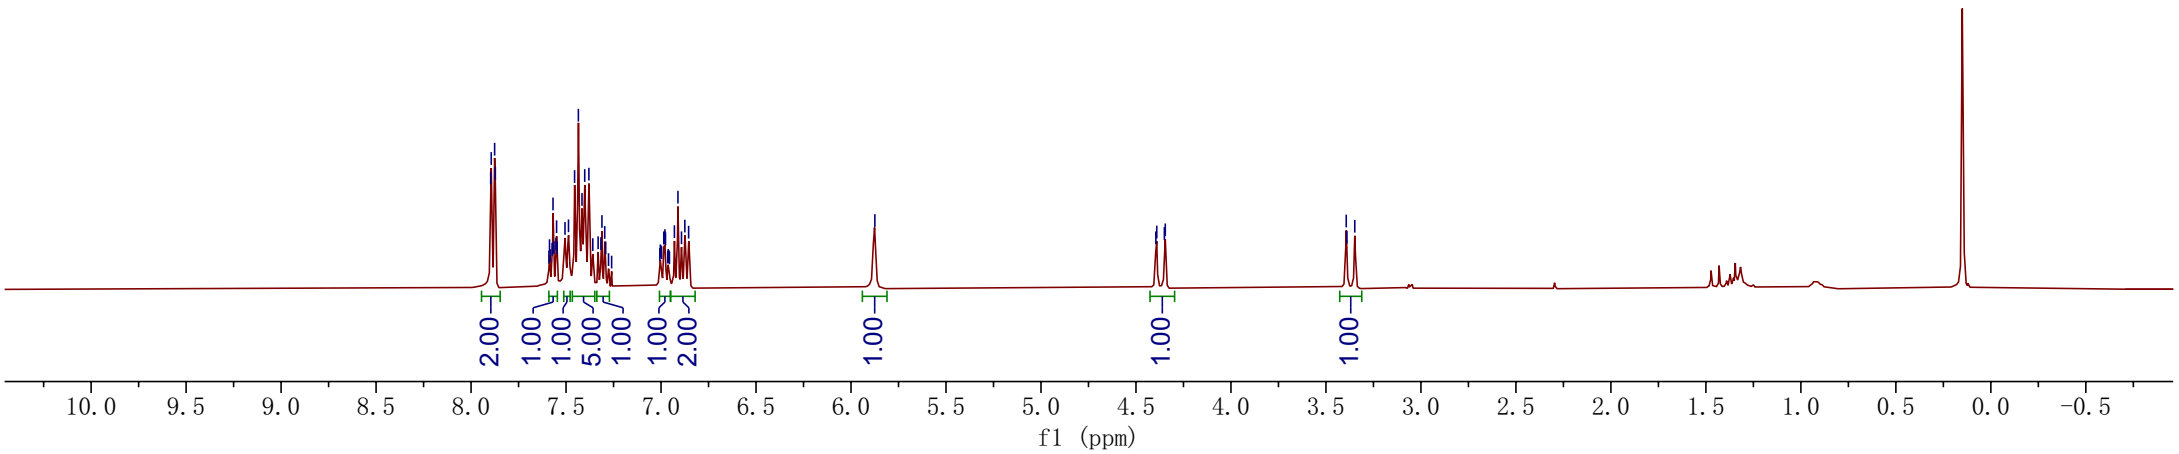

198.00  
197.98

163.99  
161.55  
149.45  
149.39  
149.37  
149.31  
140.35  
140.30  
140.29  
140.23  
136.60  
133.78  
133.13  
129.72  
129.63  
129.09  
128.67  
127.93  
126.59  
124.30  
124.09  
122.07  
122.04  
120.08  
119.83  
119.82  
119.57  
119.46  
114.76  
114.55  
114.25  
114.02  
111.32  
77.32  
77.00  
76.68  
71.81  
71.59  
71.53  
71.32  
42.07  
42.04  
41.97  
41.95

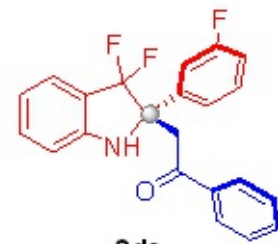

**3da**  
<sup>13</sup>C NMR (100 MHz, CDCl<sub>3</sub>)

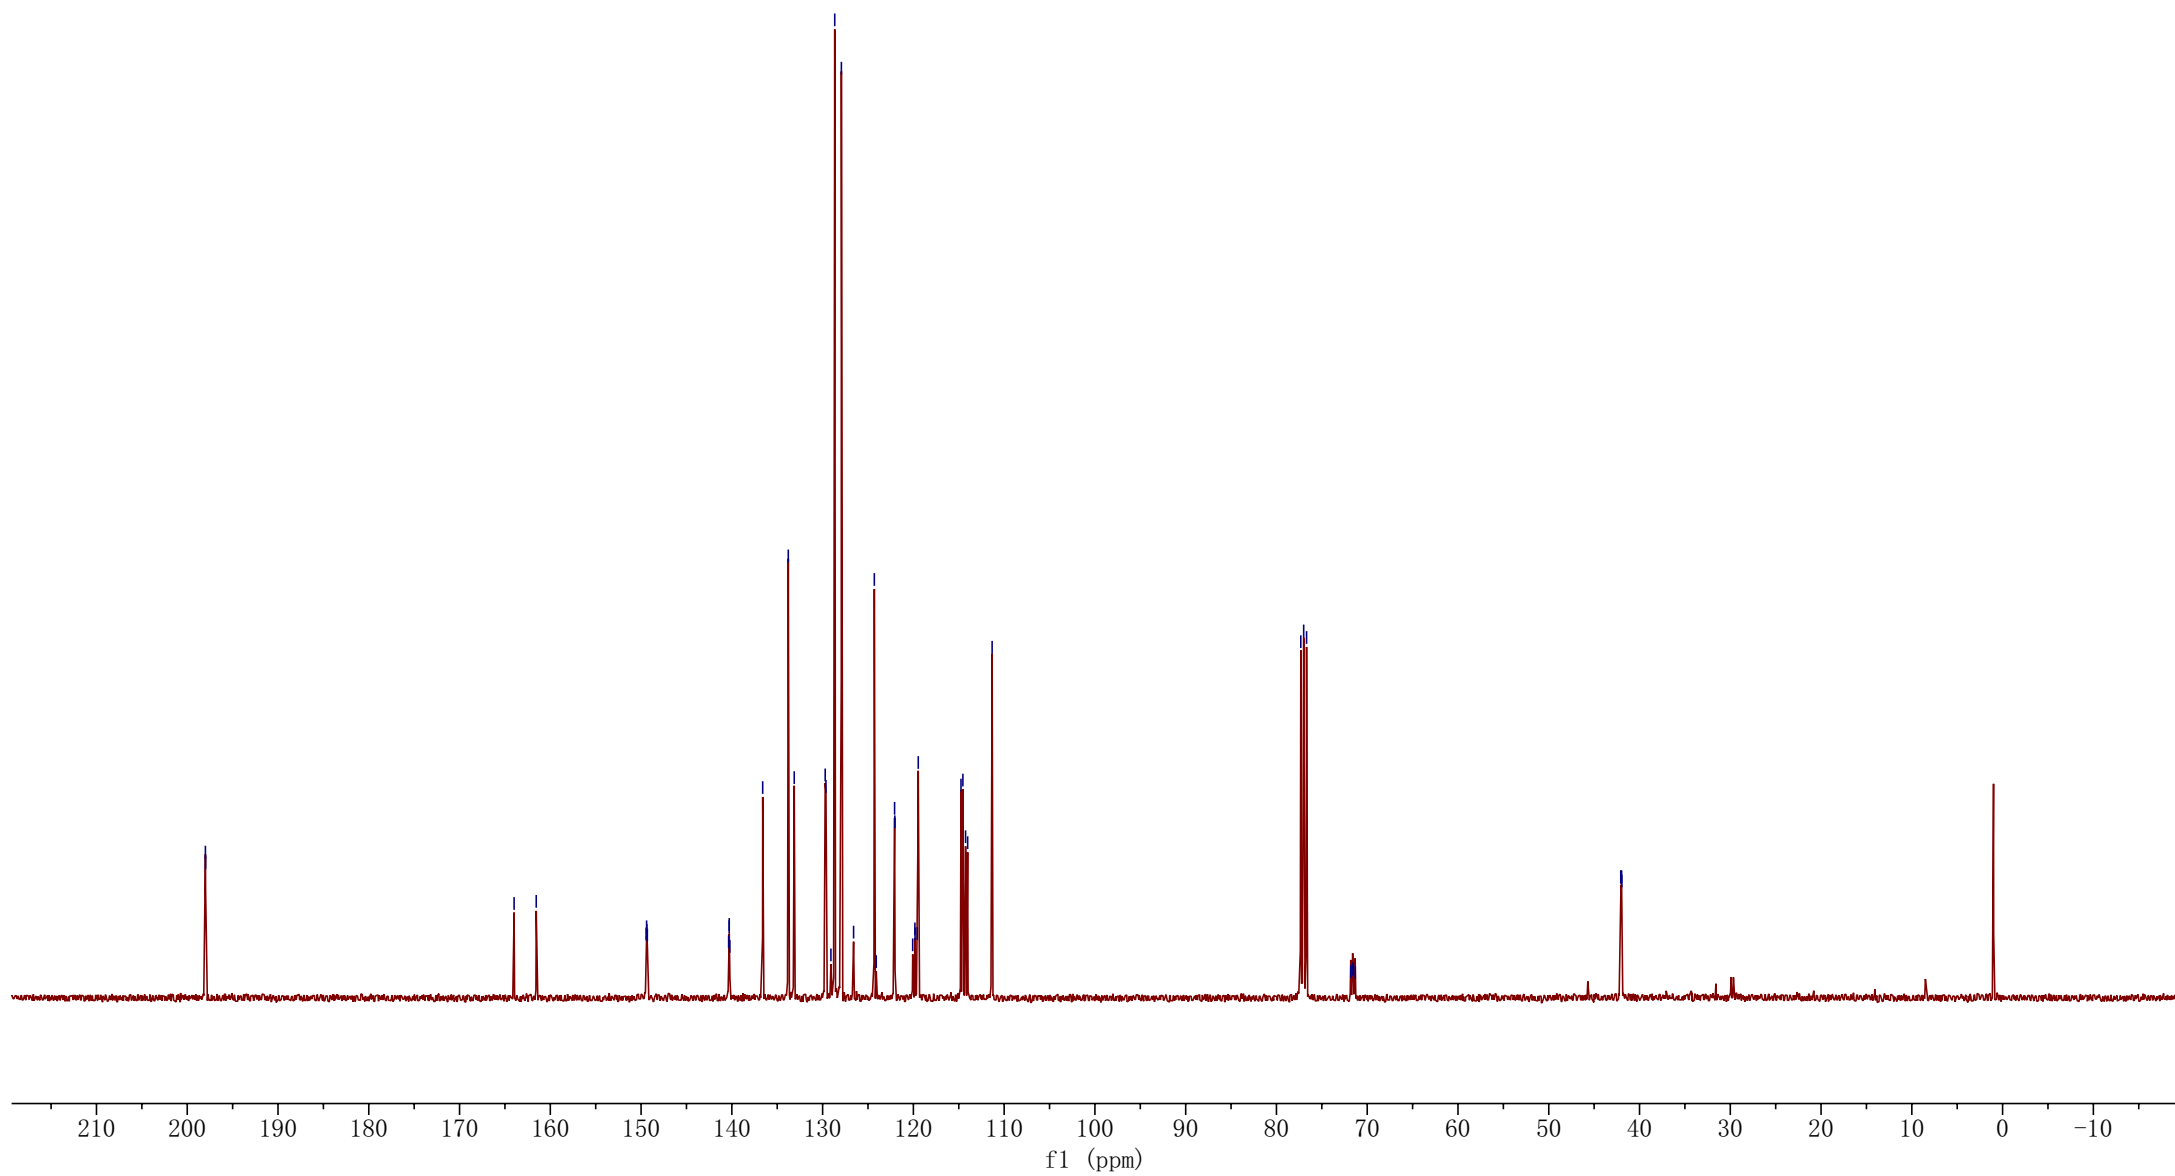

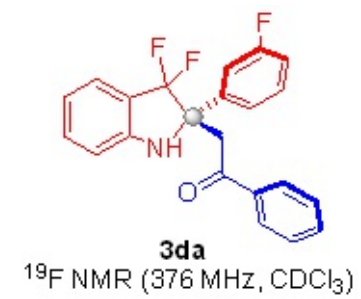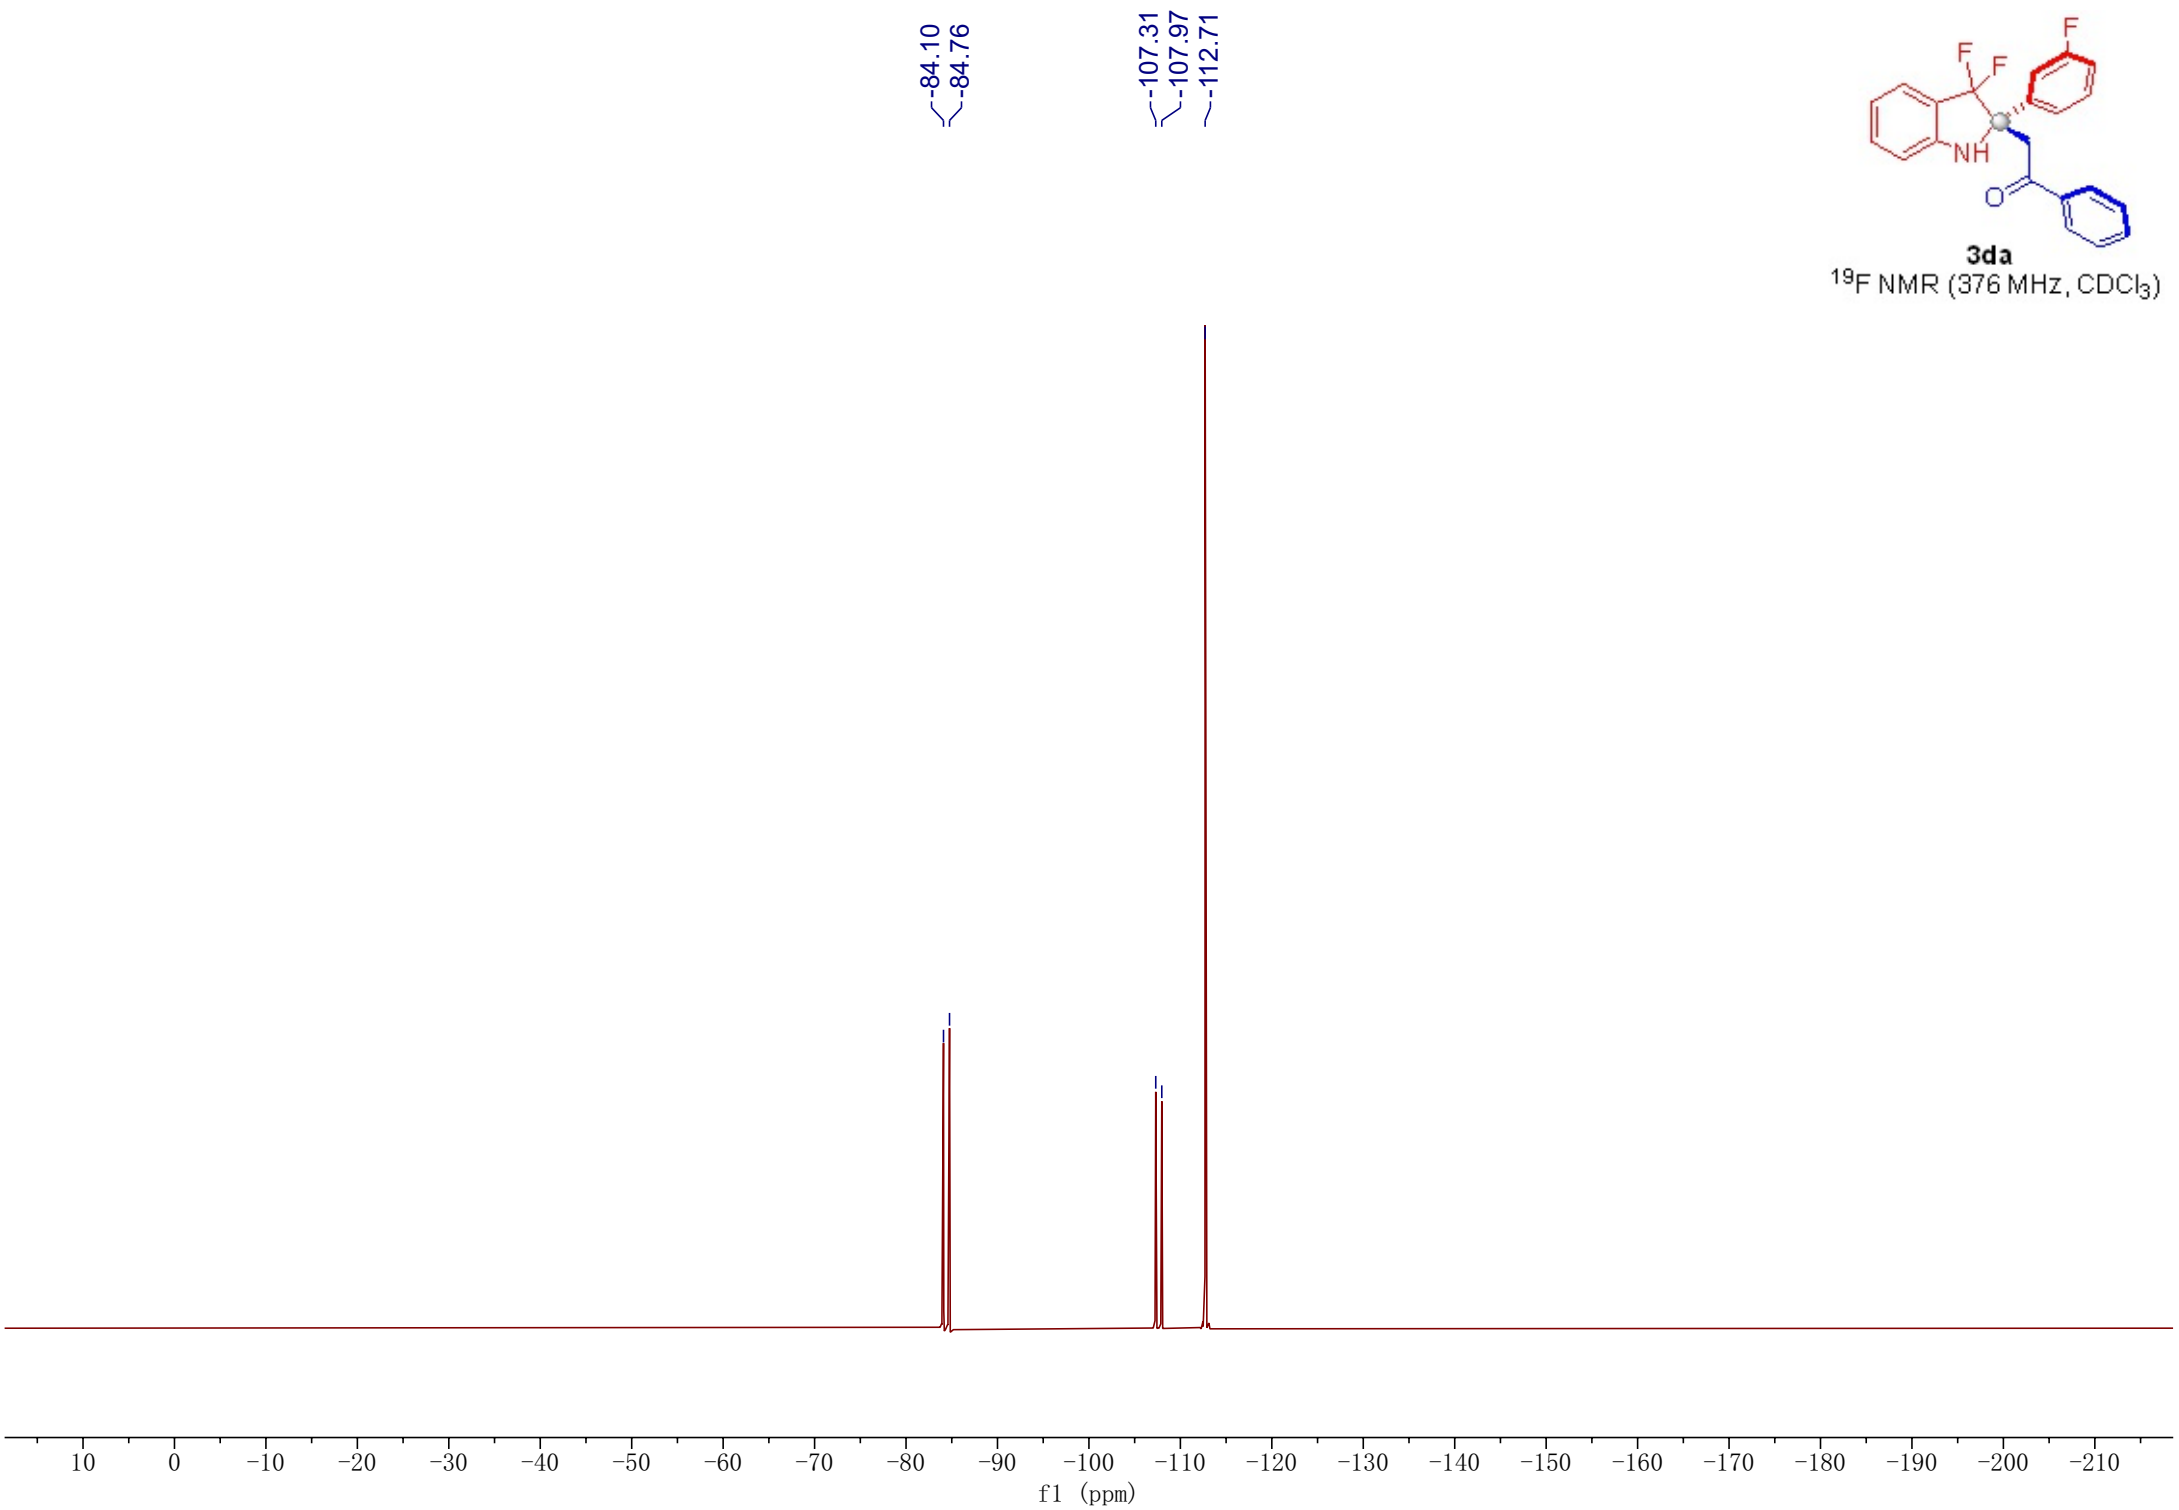

7.969  
7.877  
7.857  
7.787  
7.569  
7.564  
7.559  
7.554  
7.550  
7.547  
7.540  
7.507  
7.488  
7.480  
7.460  
7.452  
7.441  
7.432  
7.413  
6.938  
6.919  
6.900  
6.892  
6.871  
— 5.869

7.969  
7.877  
7.857  
7.807  
7.787  
7.587  
7.584  
7.573  
7.569  
7.564  
7.559  
7.554  
7.550  
7.547  
7.540  
7.507  
7.488  
7.480  
7.460  
7.452  
7.441  
7.432  
7.413  
7.403  
7.385  
7.365  
7.260  
6.938  
6.919  
6.900  
6.892  
6.871

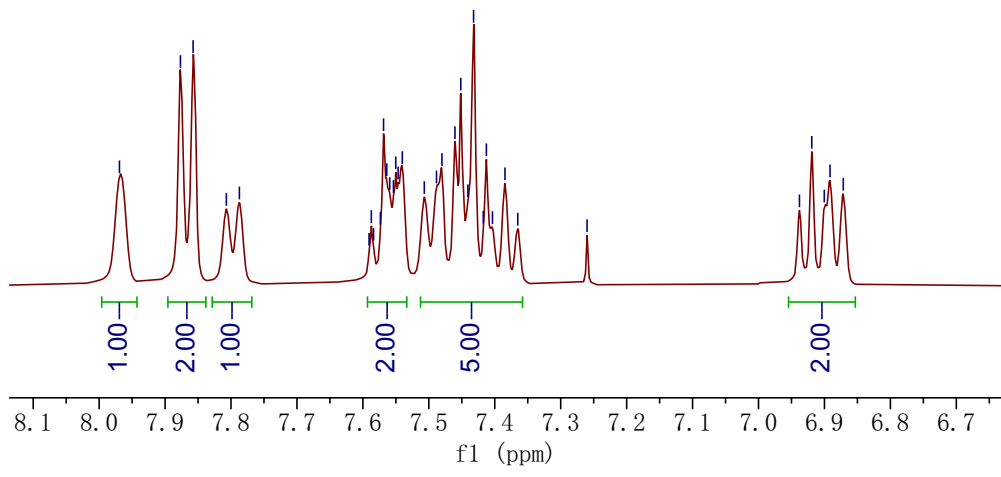

4.401  
4.356

3.417  
3.373

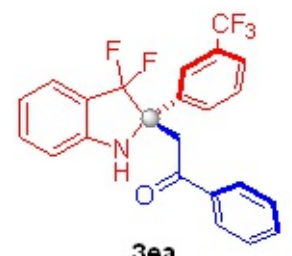

<sup>1</sup>H NMR (400 MHz, CDCl<sub>3</sub>)

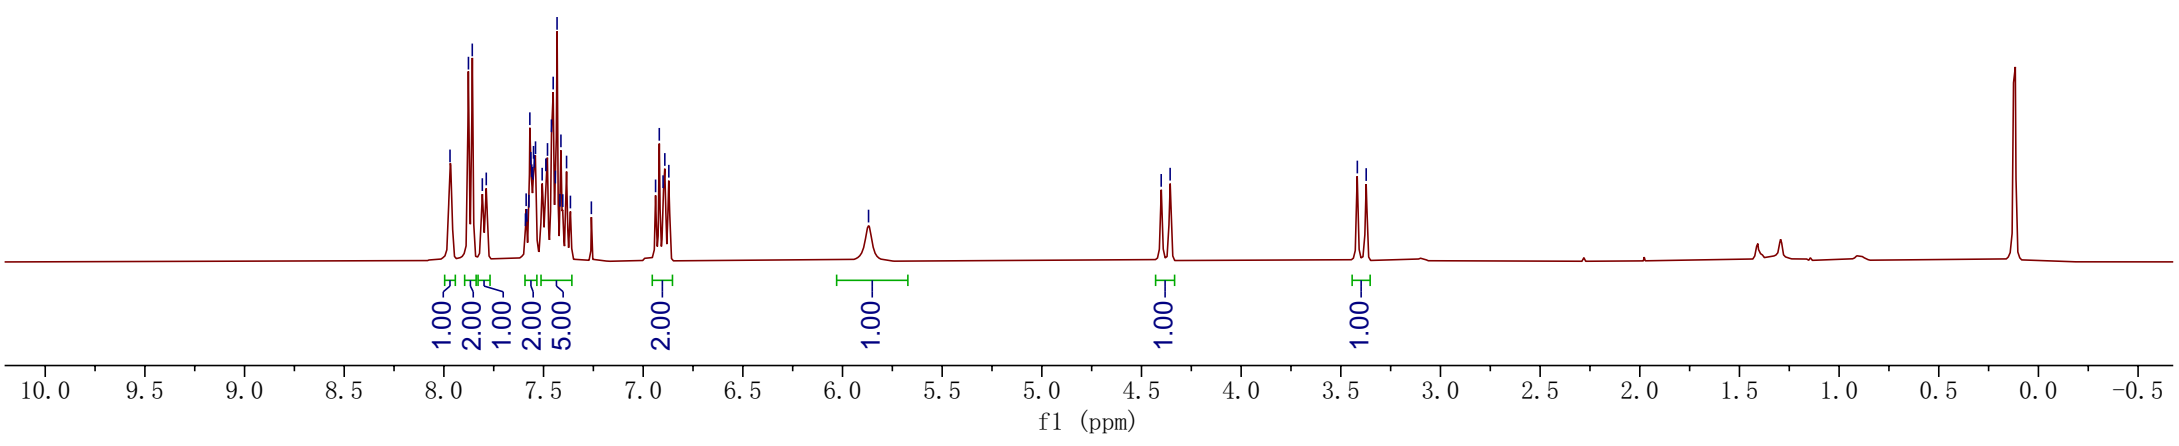

— 197.99

149.31  
149.26  
149.23  
149.18  
138.72  
138.66  
136.48  
133.91  
133.22  
131.03  
130.71  
130.39  
130.07  
129.79  
129.08  
128.71  
128.68  
127.95  
126.58  
125.43  
124.71  
124.67  
124.63  
124.60  
124.34  
124.08  
123.72  
123.68  
122.72  
119.97  
119.72  
119.71  
119.66  
119.46  
111.54  
77.32  
77.20  
77.00  
76.68  
71.93  
71.72  
71.65  
71.44  
42.12  
42.09  
42.03  
42.00

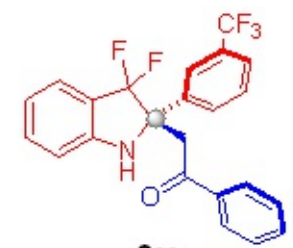

**3ea**  
<sup>13</sup>C NMR (100 MHz, CDCl<sub>3</sub>)

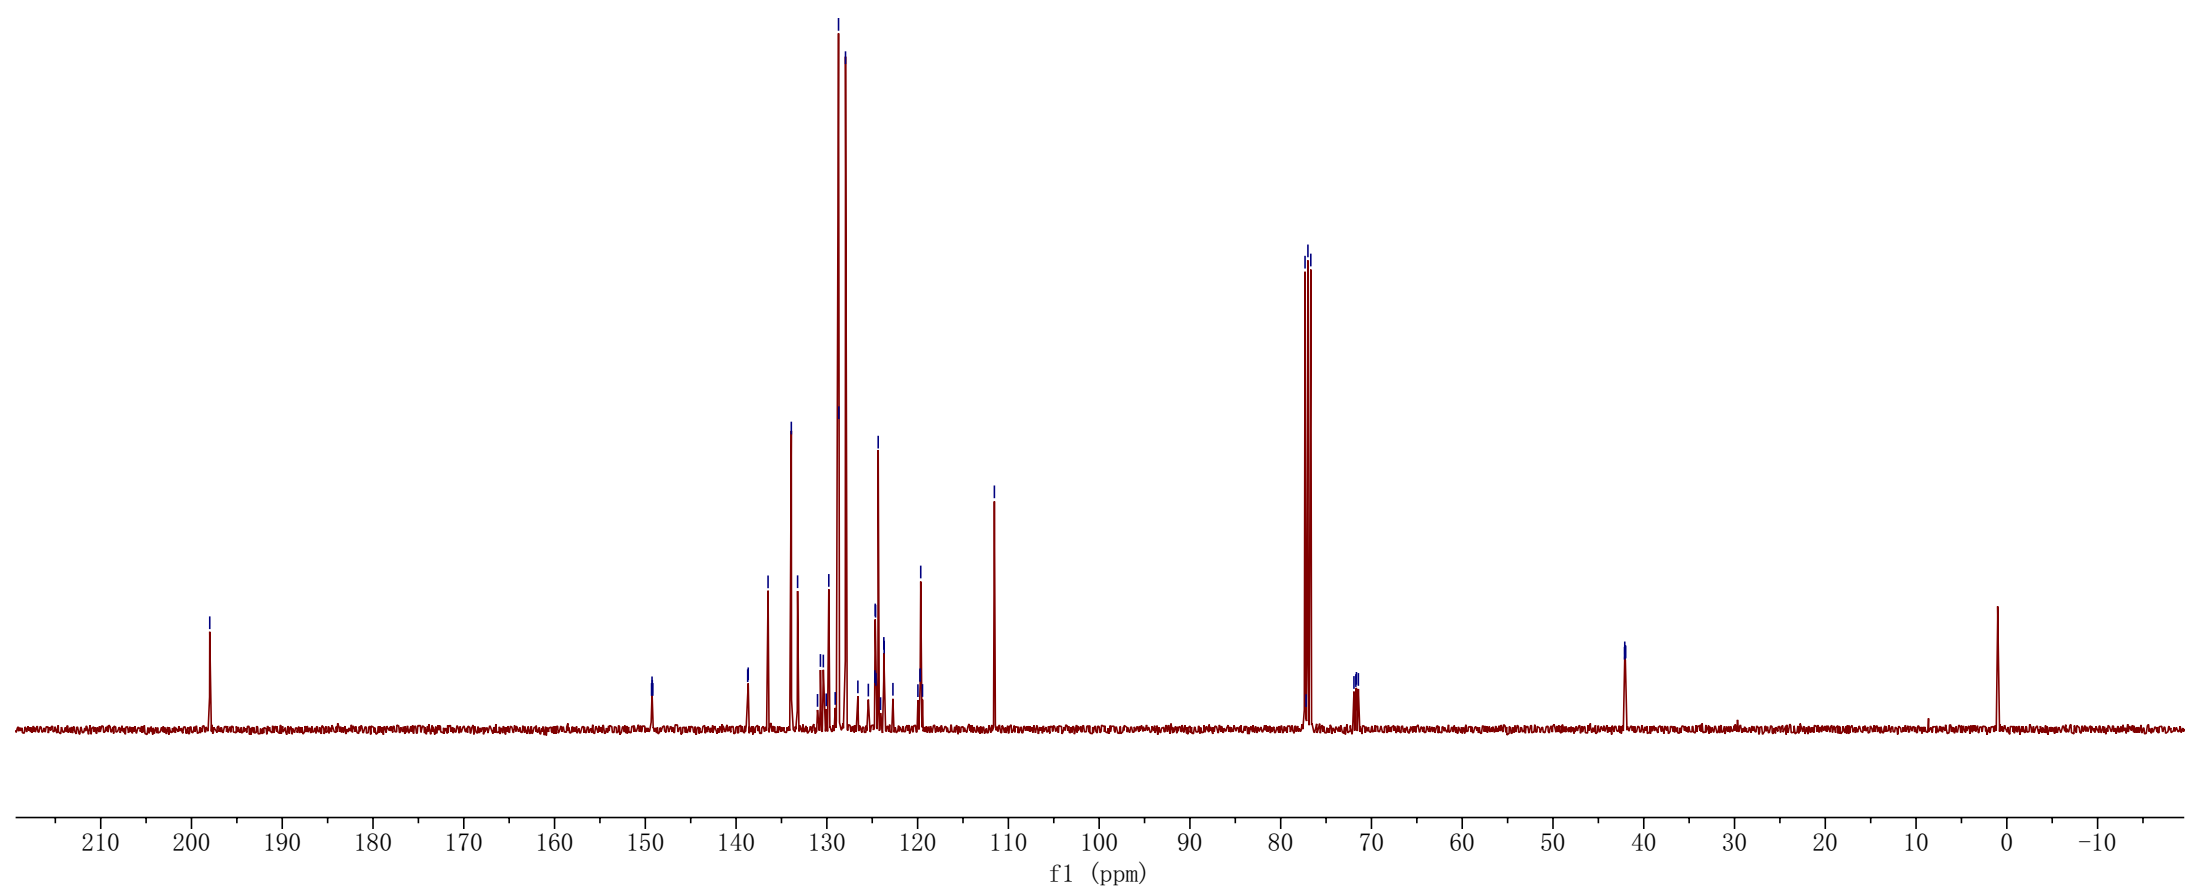

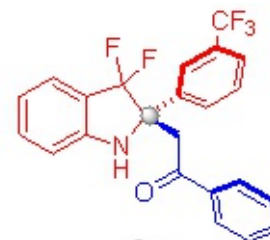

**3ea**  
<sup>19</sup>F NMR (376 MHz, CDCl<sub>3</sub>)

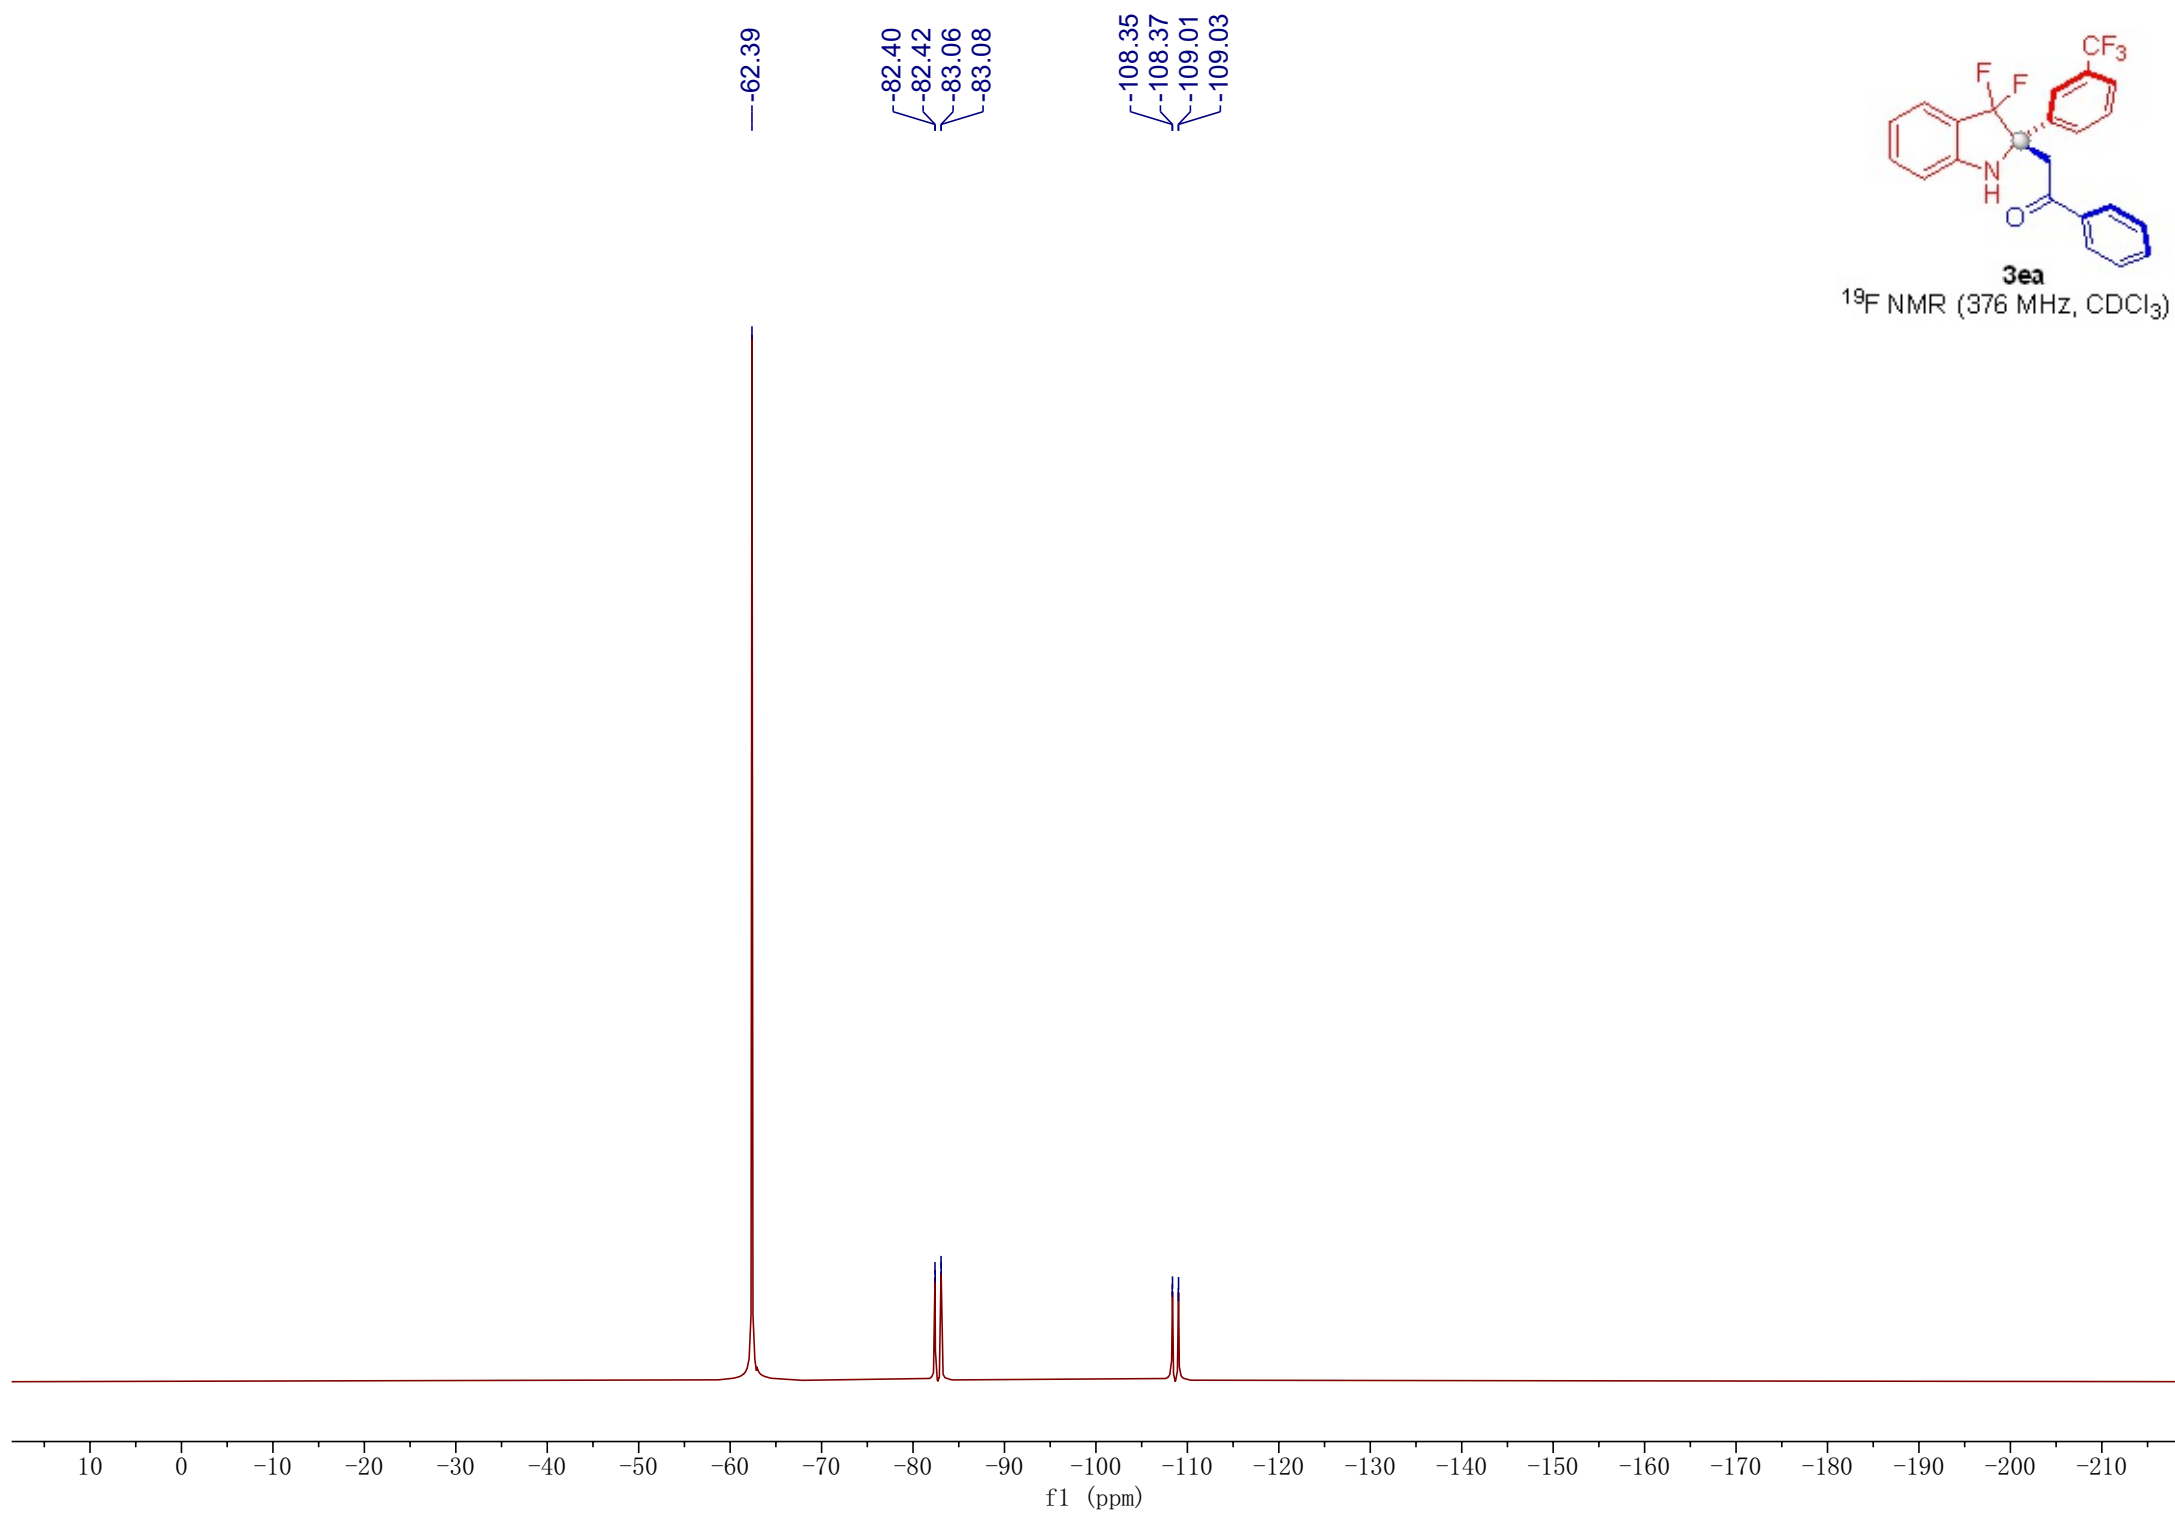

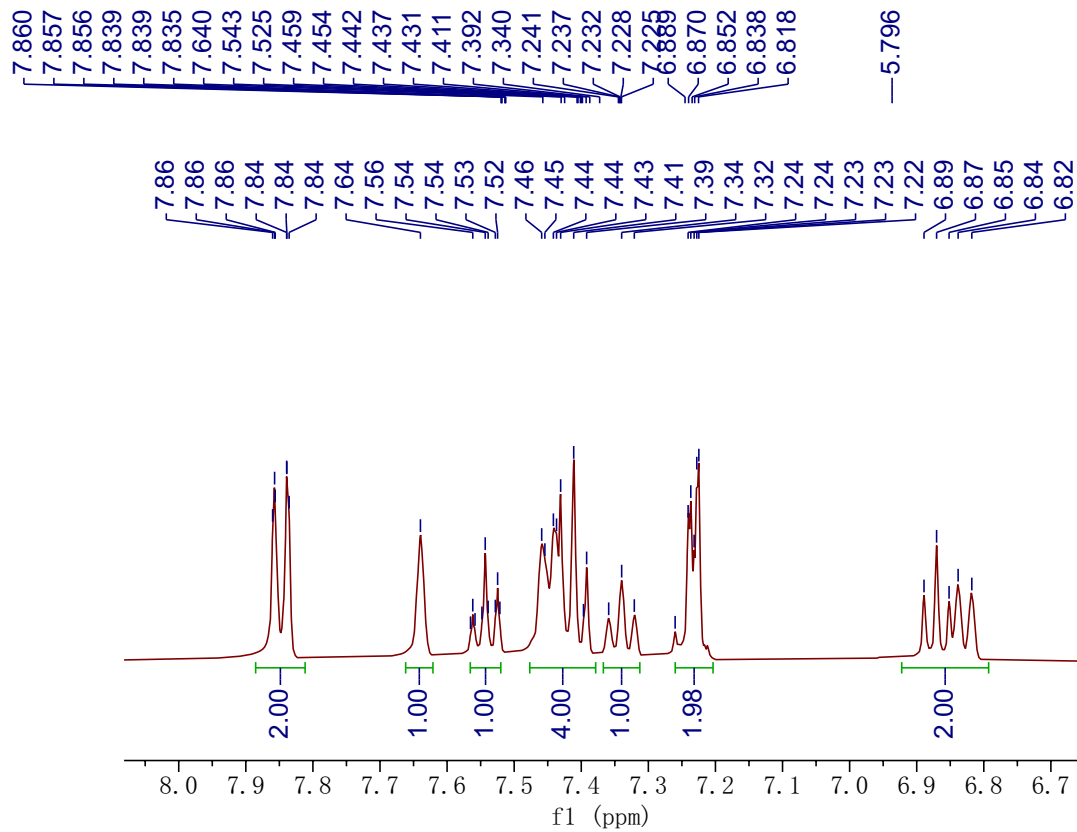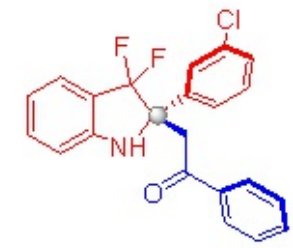

**3fa**  
<sup>1</sup>H NMR (400 MHz, CDCl<sub>3</sub>)

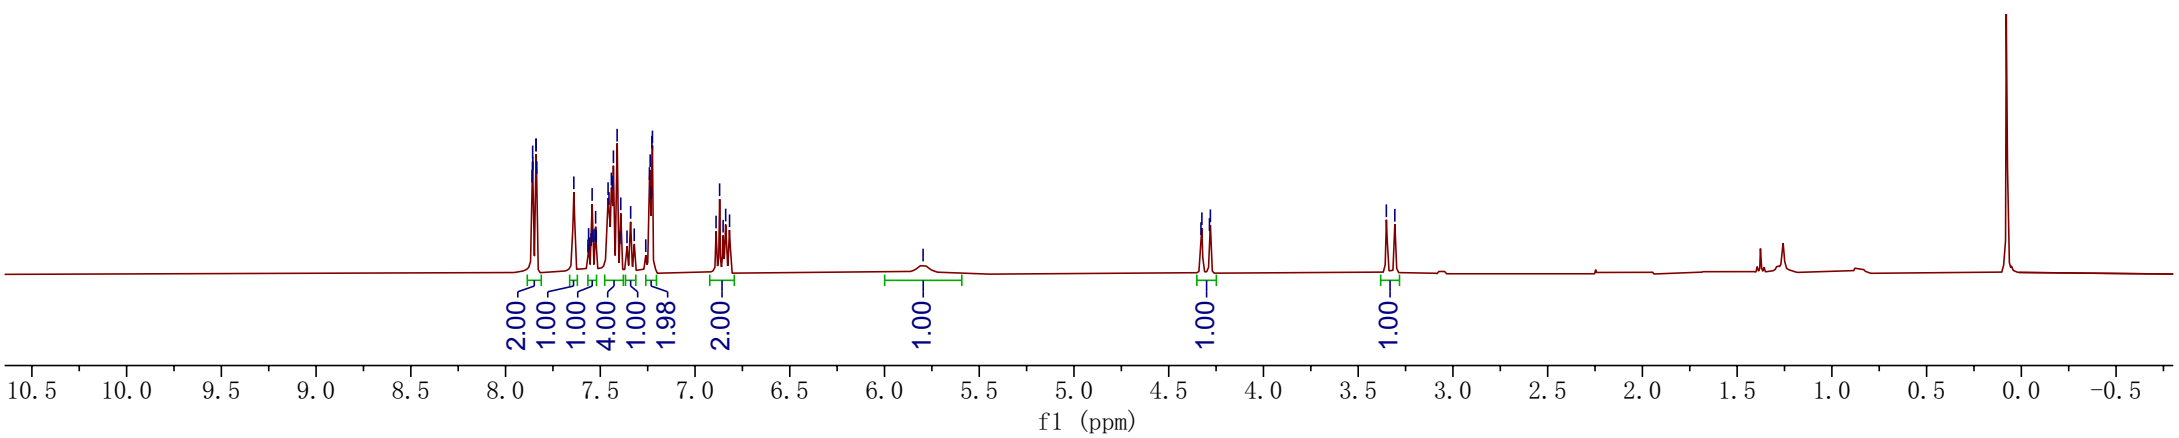

197.97  
197.96

149.38  
149.33  
149.30  
149.25  
139.71  
139.66  
136.62  
134.36  
133.84  
133.17  
129.44  
129.08  
128.71  
127.98  
127.96  
127.10  
126.58  
124.64  
124.34  
124.09  
120.06  
119.82  
119.80  
119.56  
119.52  
111.38  
77.32  
77.00  
76.68  
71.80  
71.59  
71.53  
71.31  
42.11  
42.08  
42.01  
41.99

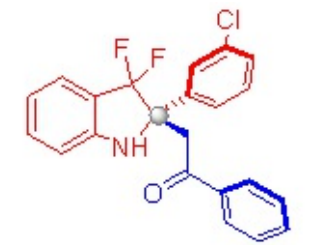

**3fa**  
<sup>13</sup>C NMR (100 MHz, CDCl<sub>3</sub>)

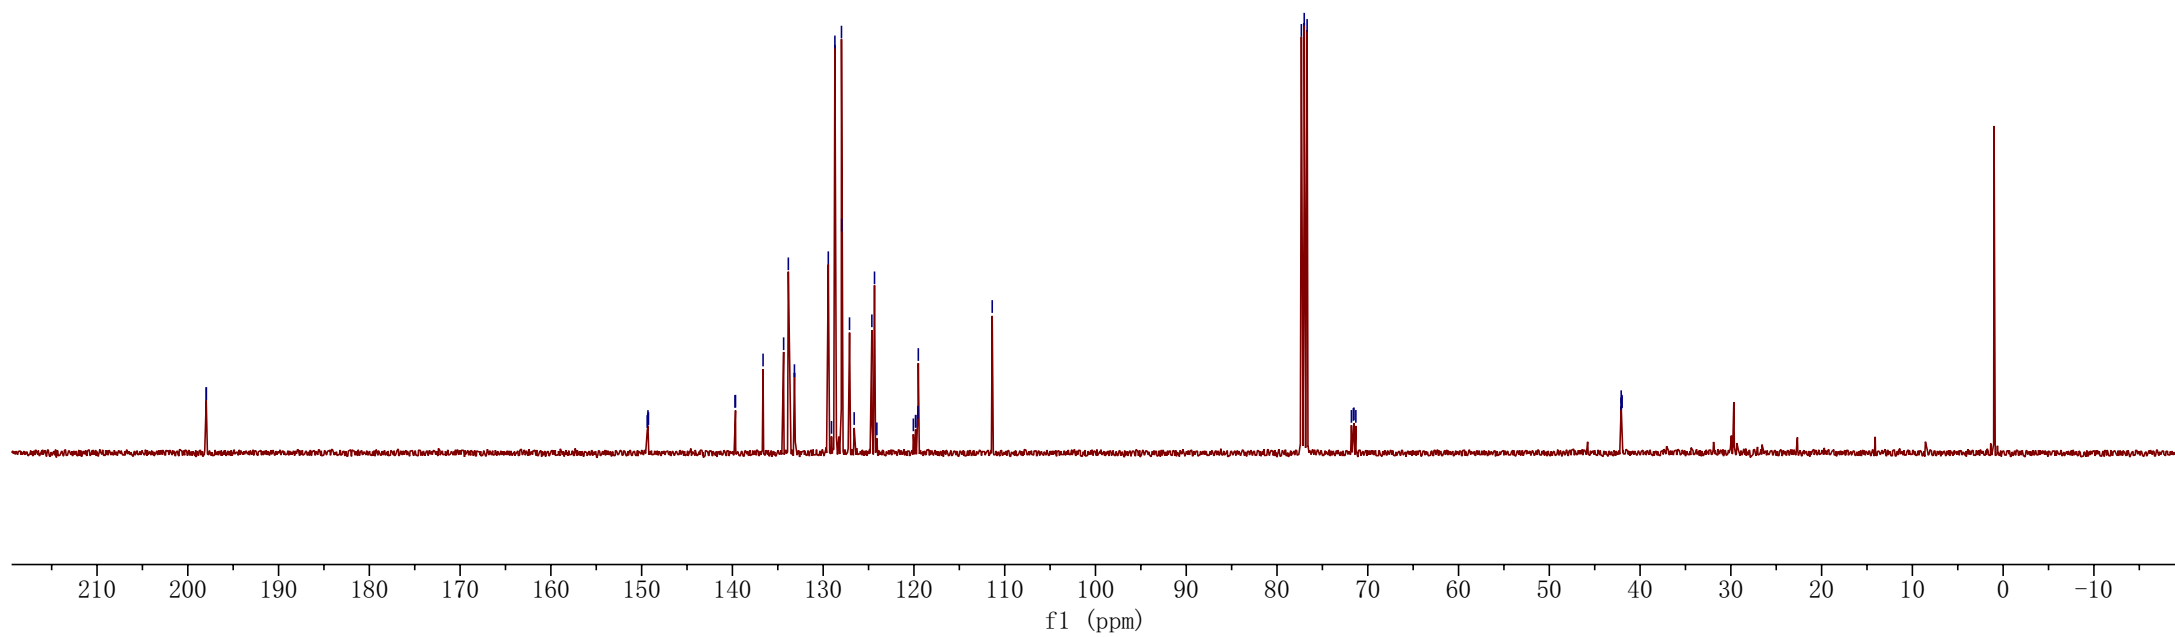



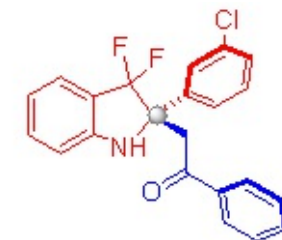

**3fa**

<sup>19</sup>F NMR (376 MHz, CDCl<sub>3</sub>)

-83.500  
-84.159

-107.609  
-108.268

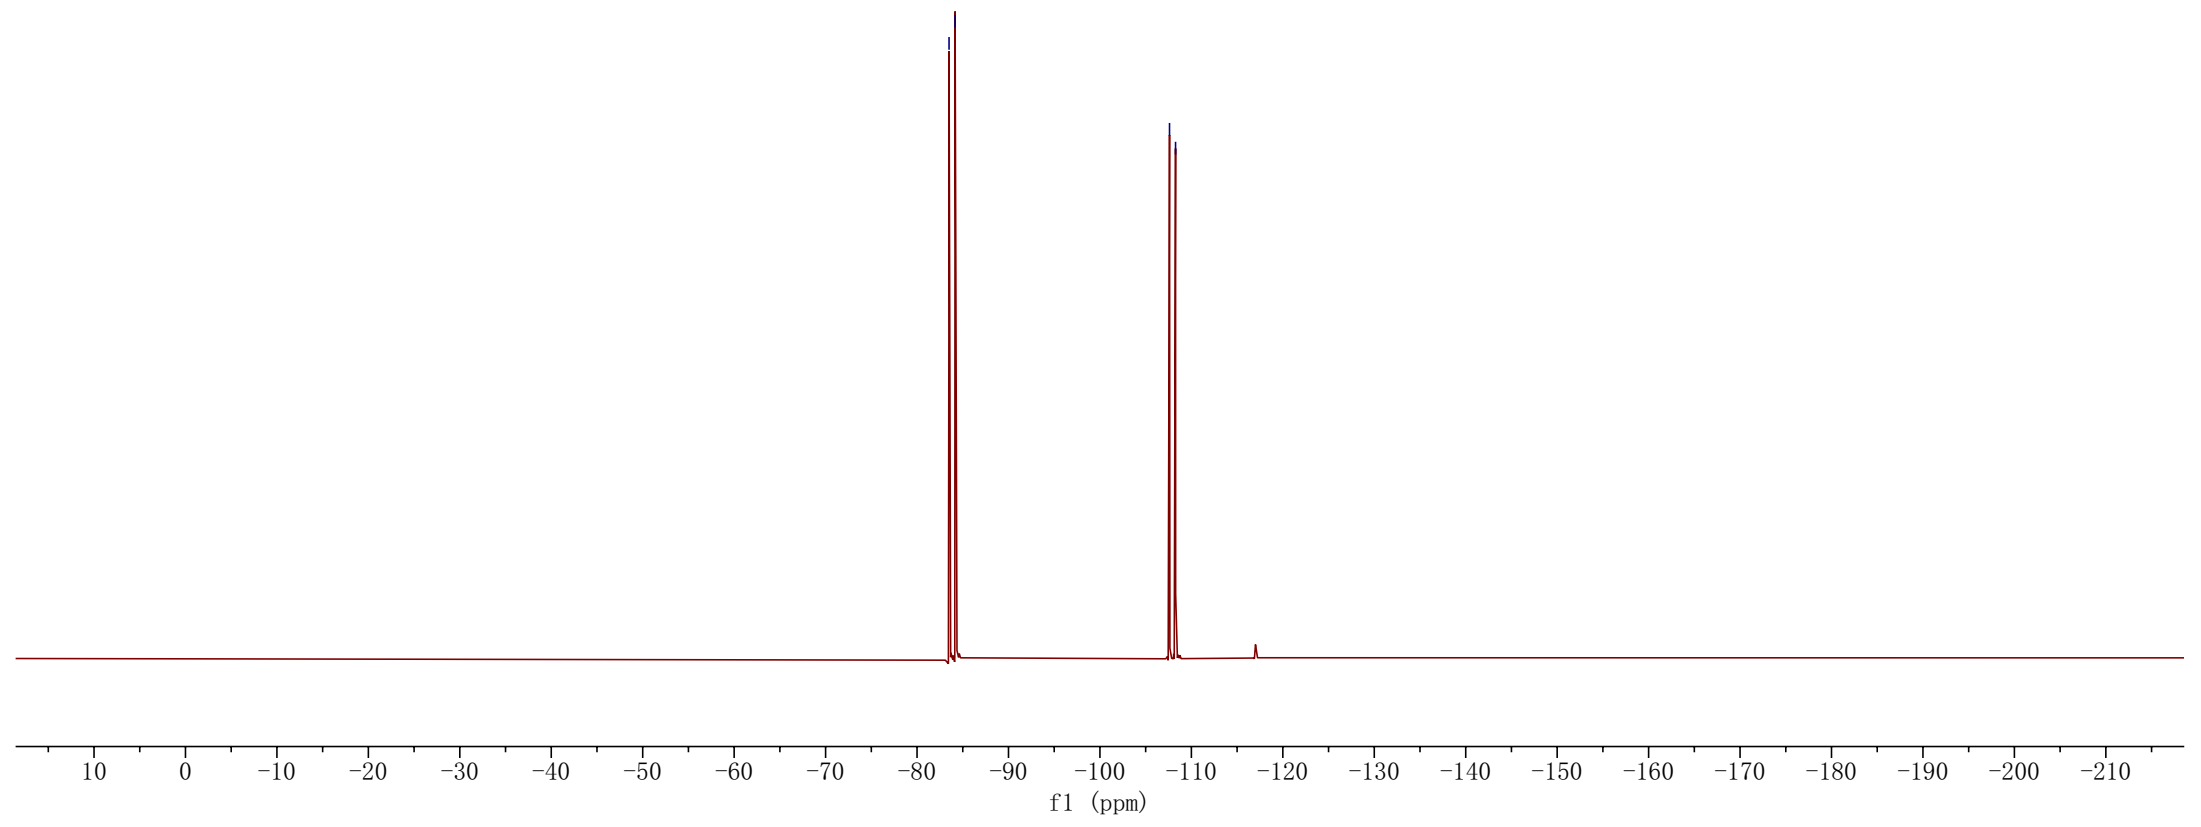

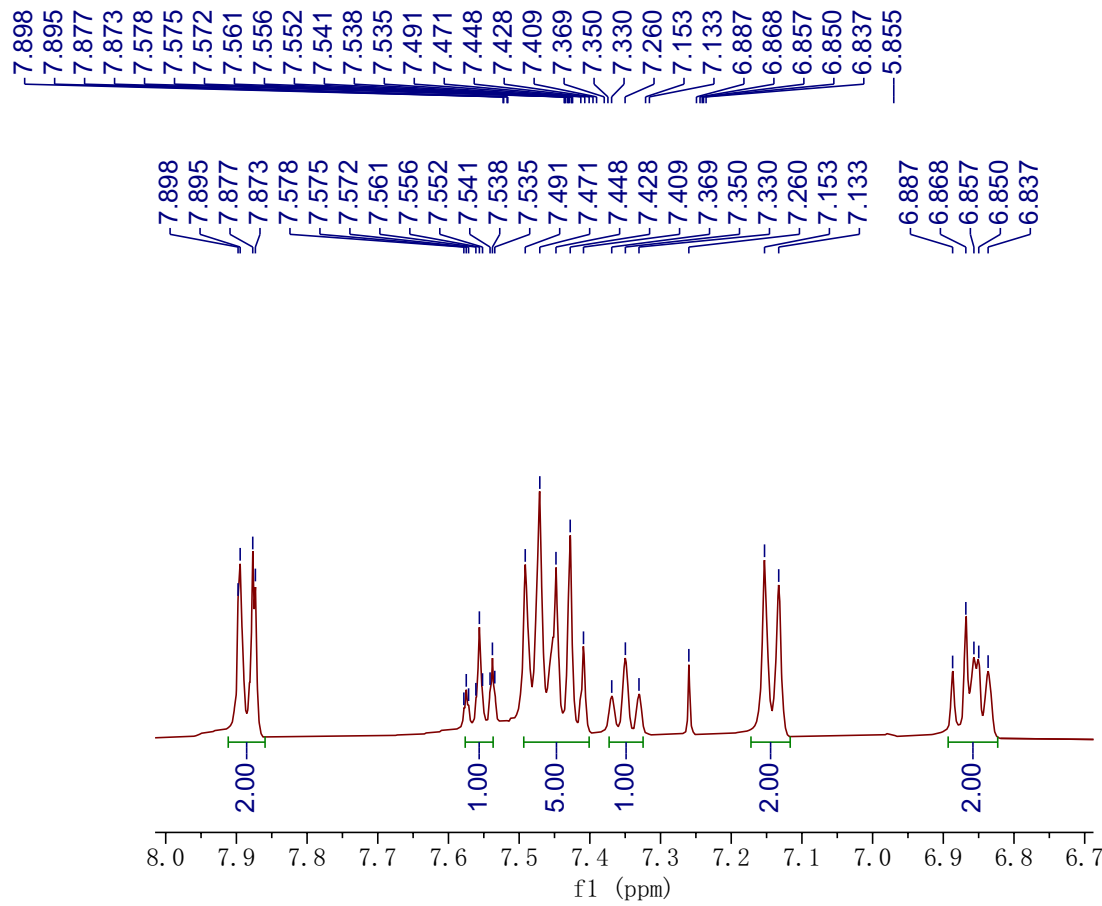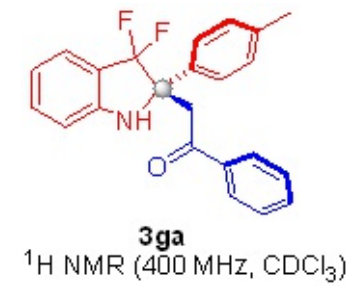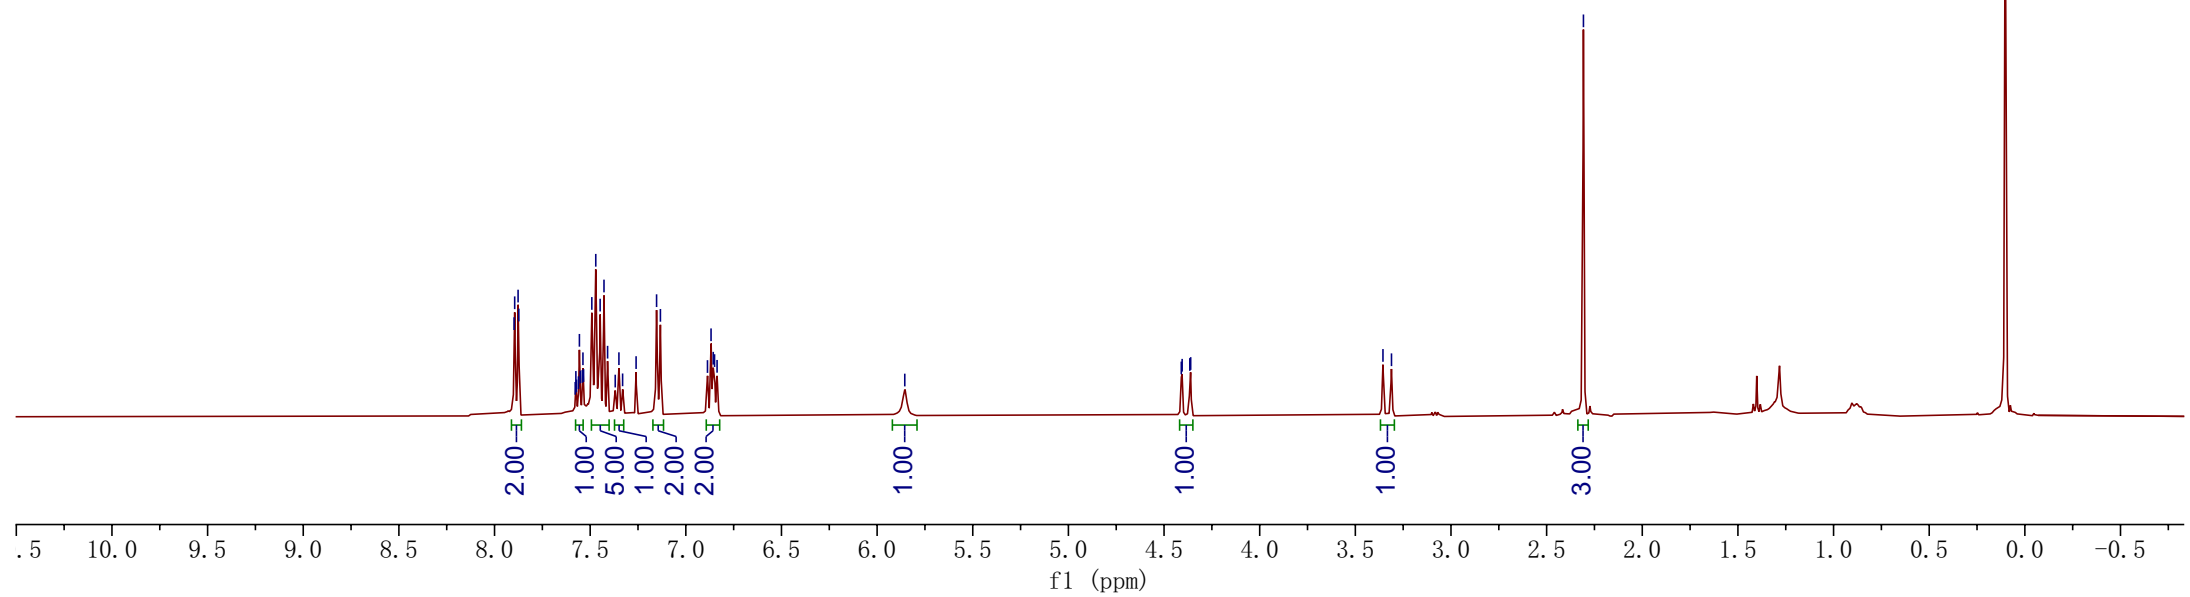

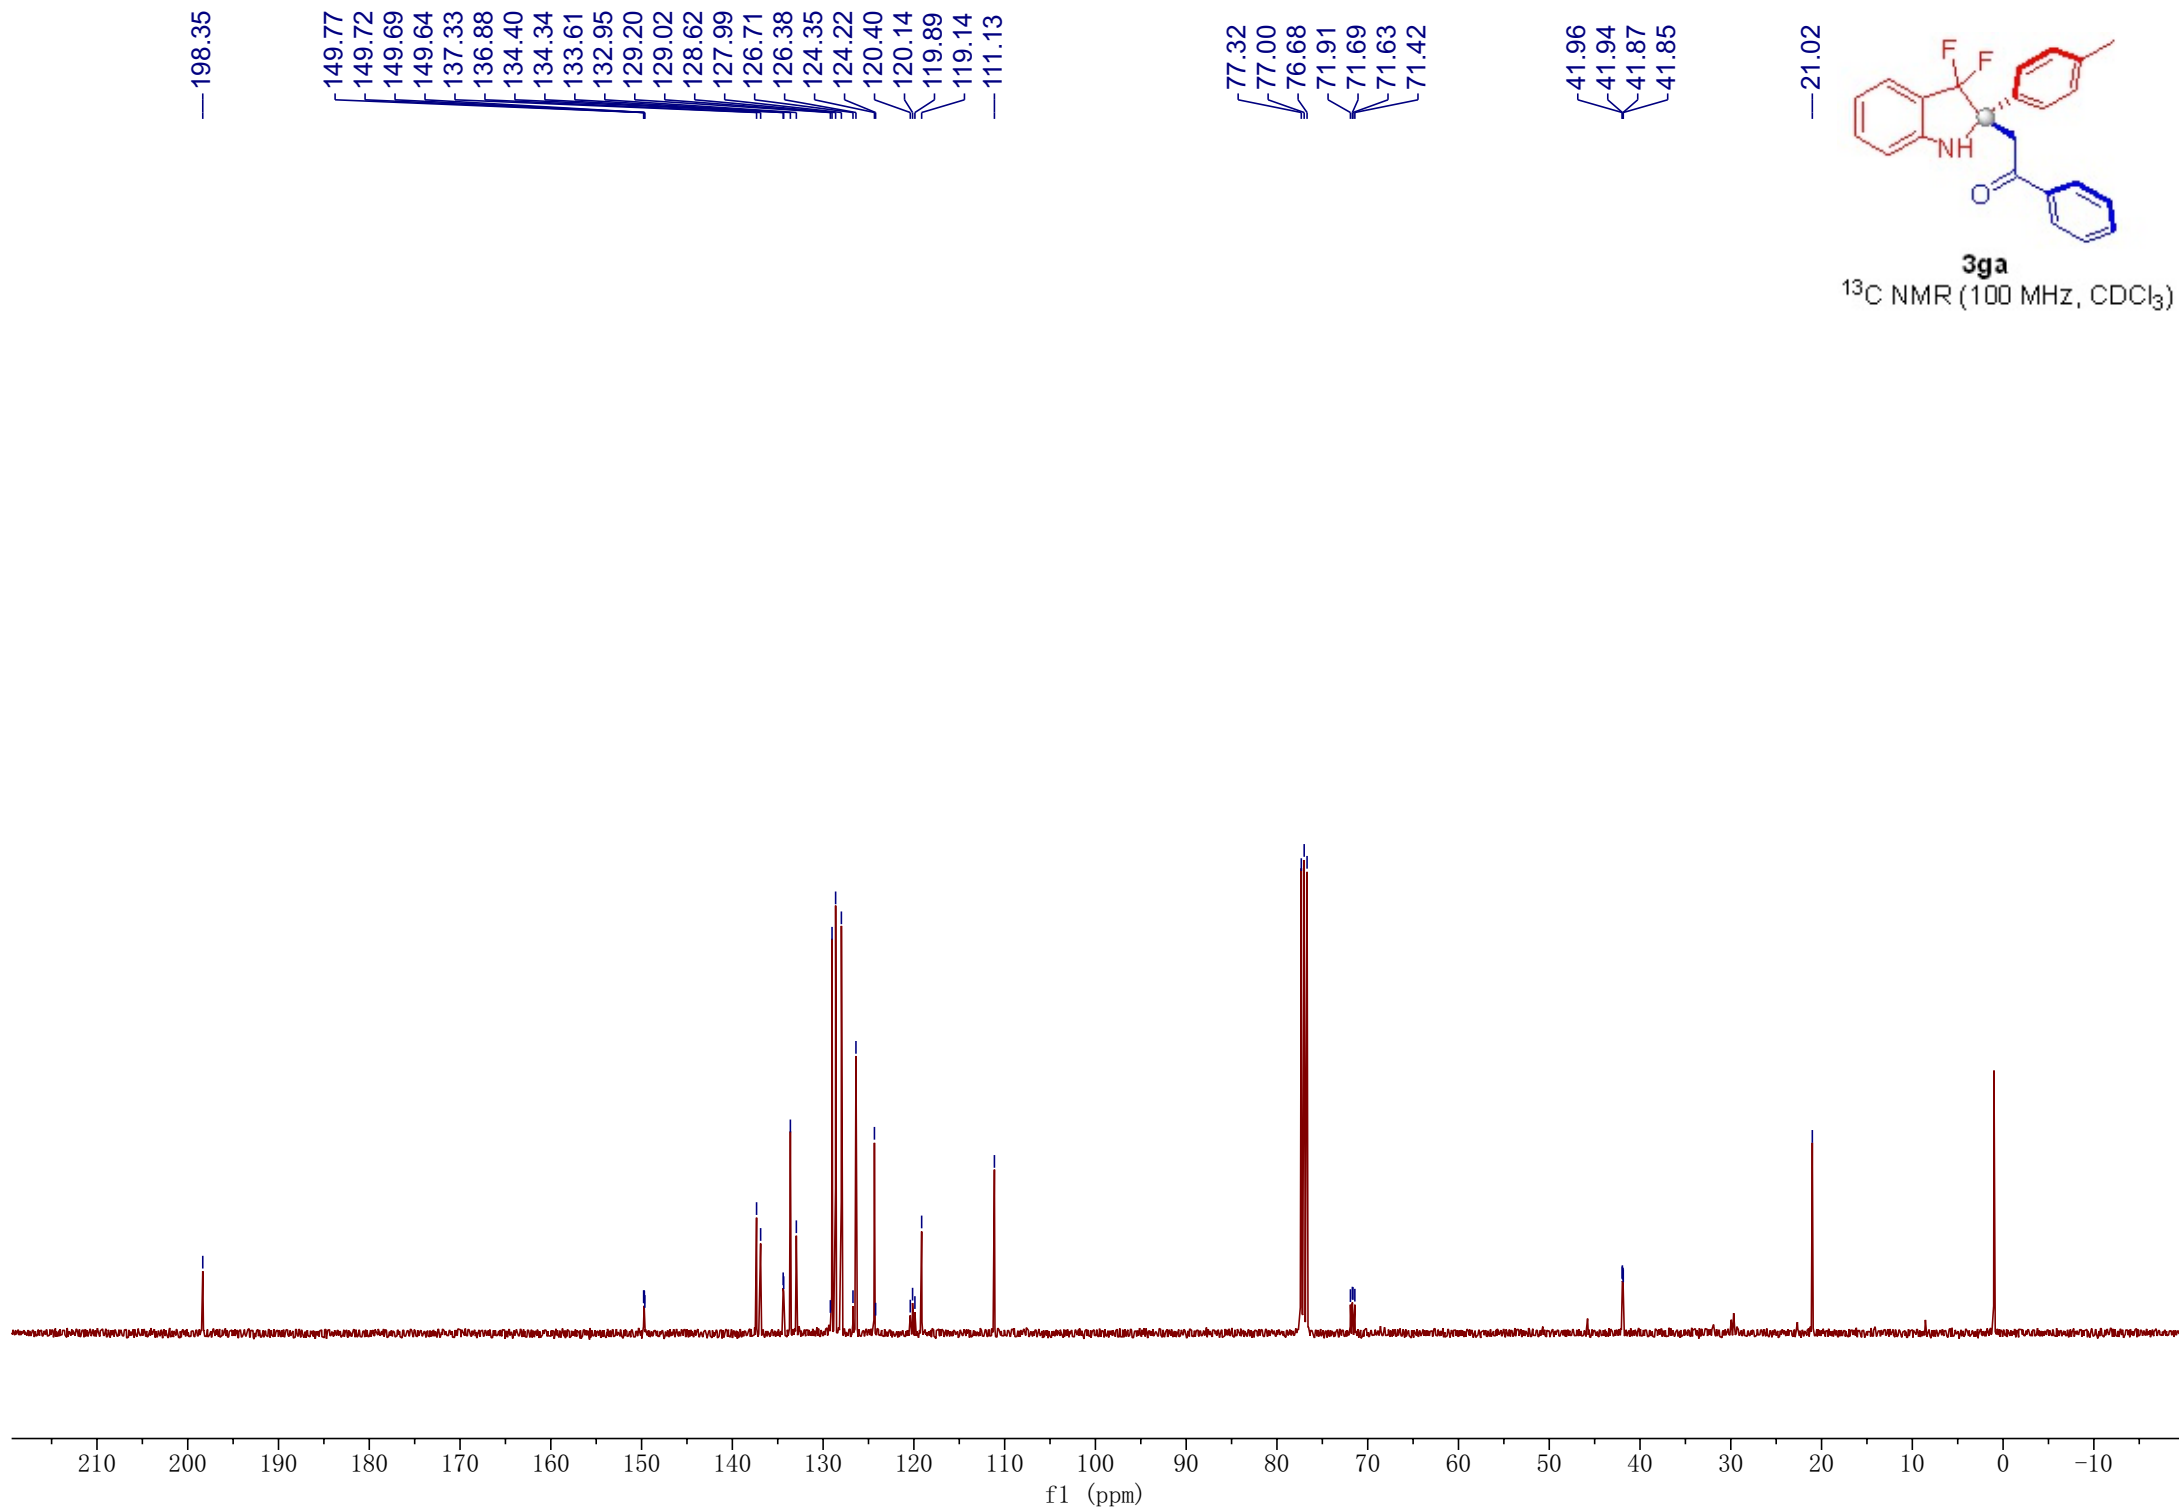

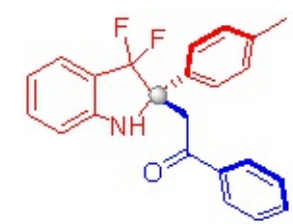

**3ga**  
<sup>19</sup>F NMR (376 MHz, CDCl<sub>3</sub>)

-85.68  
-86.34

-106.92  
-107.57

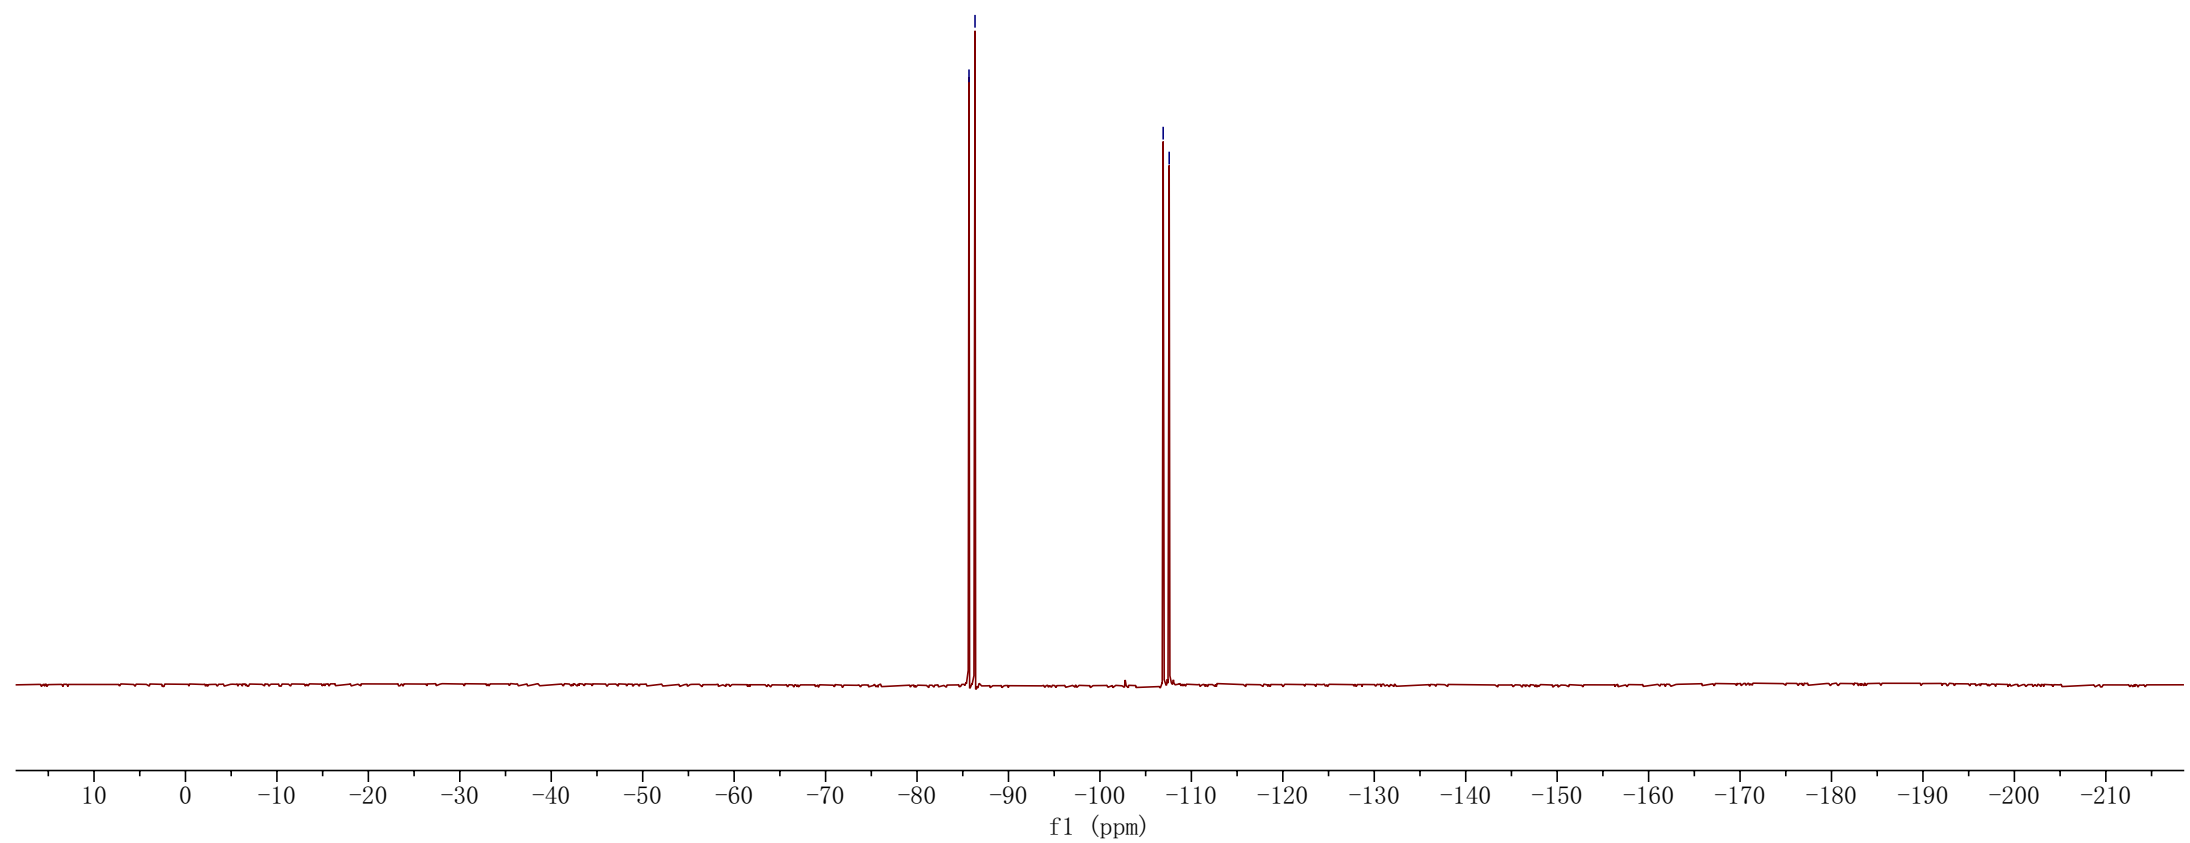

7.887  
7.886  
7.885  
7.871  
7.867  
7.864  
7.553  
7.534  
7.513  
7.491  
7.469  
7.469  
7.453  
7.449  
7.445  
7.440  
7.428  
7.425  
7.406  
7.345  
7.259  
6.884  
6.866  
6.844  
6.832

—5.867

4.383  
4.379  
4.339  
4.334

—3.761

3.322  
3.277

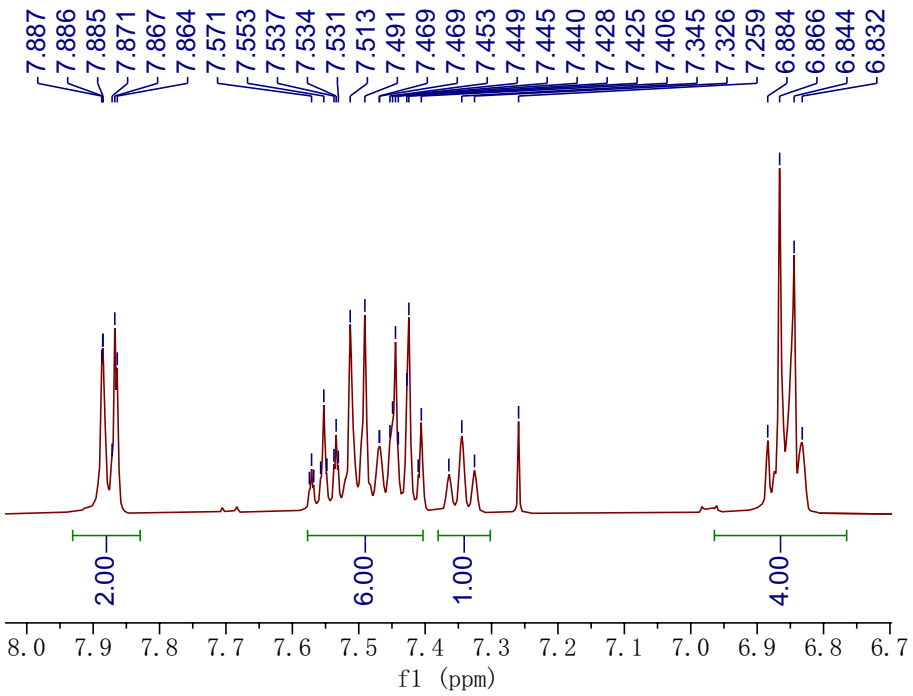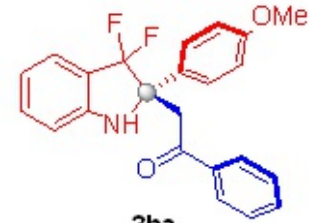

<sup>1</sup>H NMR (400 MHz, CDCl<sub>3</sub>)

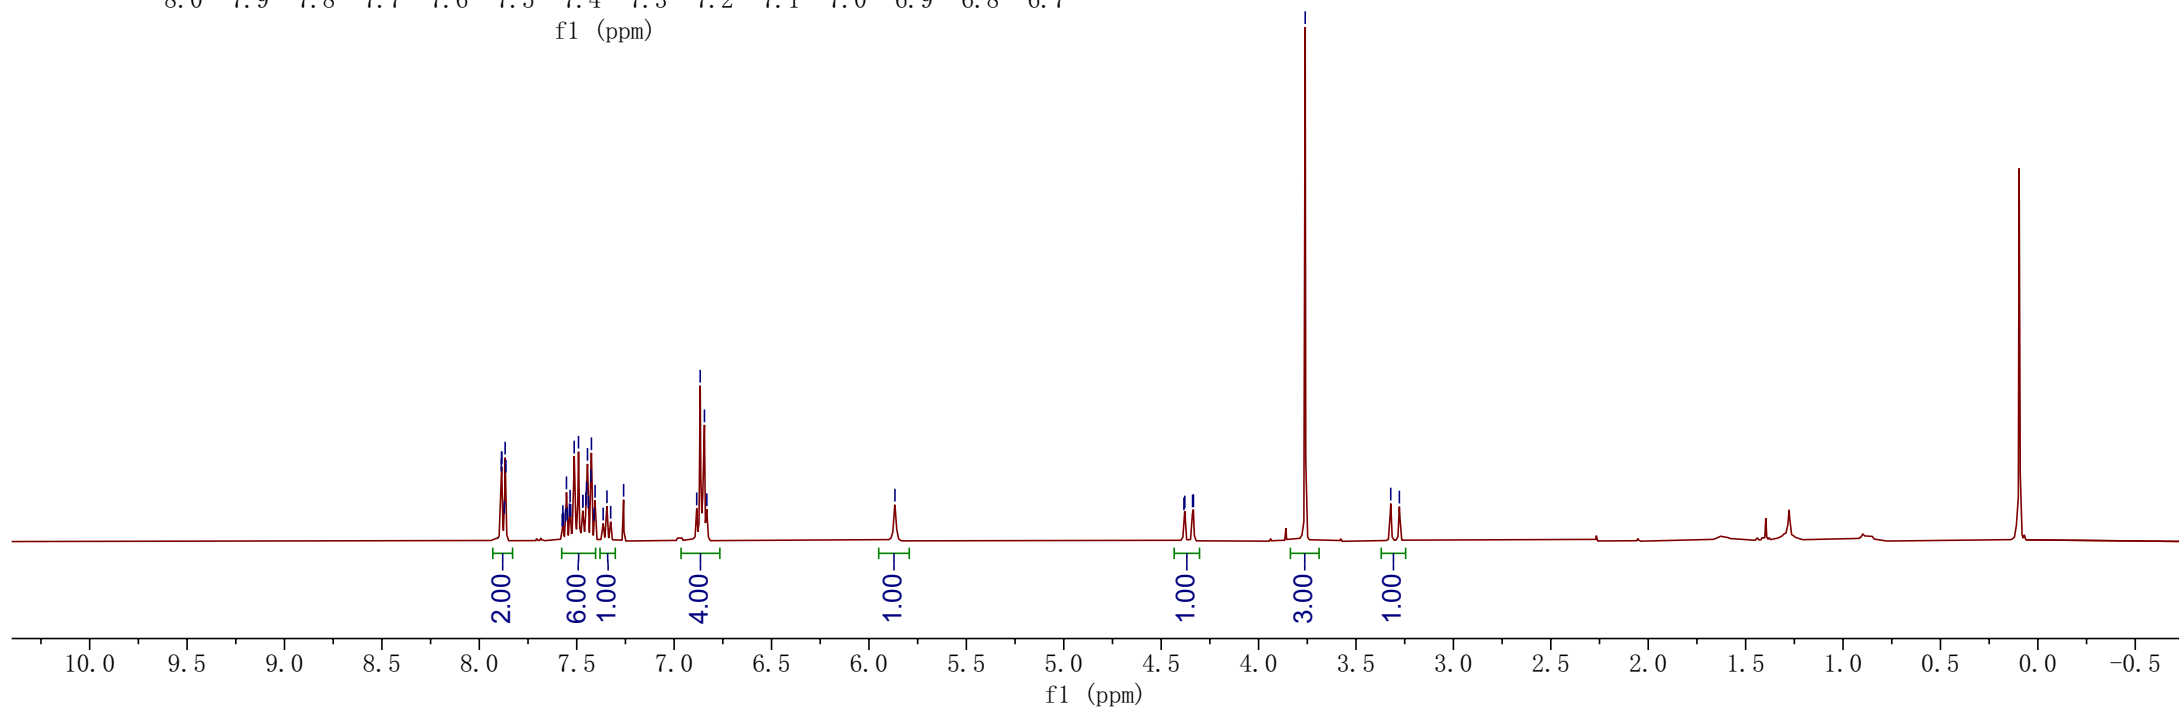

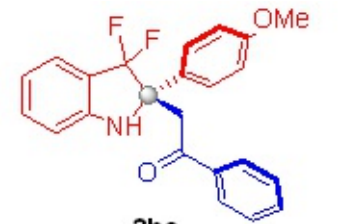

**3ha**  
<sup>13</sup>C NMR (100 MHz, CDCl<sub>3</sub>)

198.45  
198.44

159.00  
149.73  
149.68  
149.65  
149.60  
136.92  
133.63  
132.94  
129.36  
129.30  
129.18  
128.64  
127.98  
127.69  
126.69  
124.35  
124.20  
120.44  
120.19  
120.18  
119.93  
119.19  
113.65  
111.18  
77.32  
77.00  
76.68  
71.74  
71.53  
71.47  
71.26  
55.09

41.83  
41.81  
41.73  
41.71

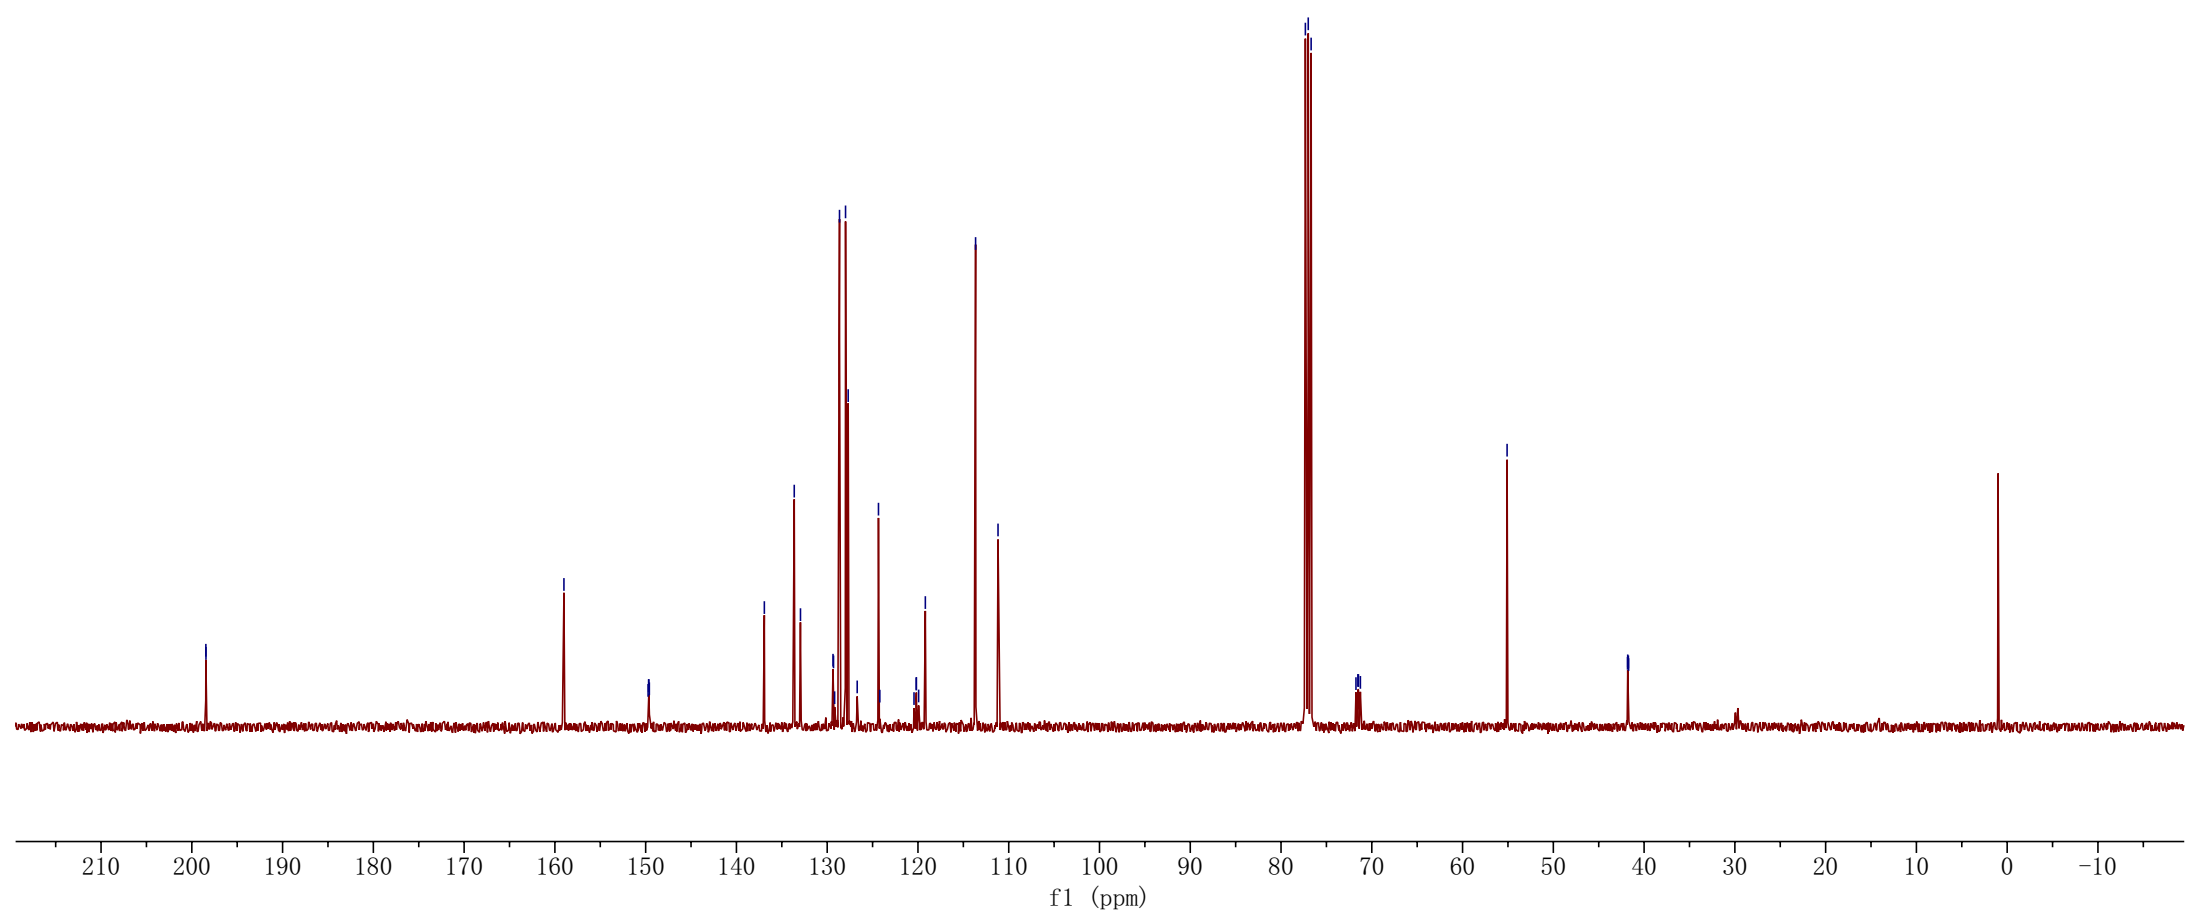

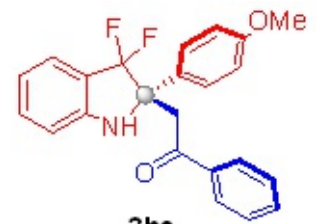

**3ha**  
<sup>19</sup>F NMR (376 MHz, CDCl<sub>3</sub>)

-85.58  
-86.24

-107.23  
-107.89

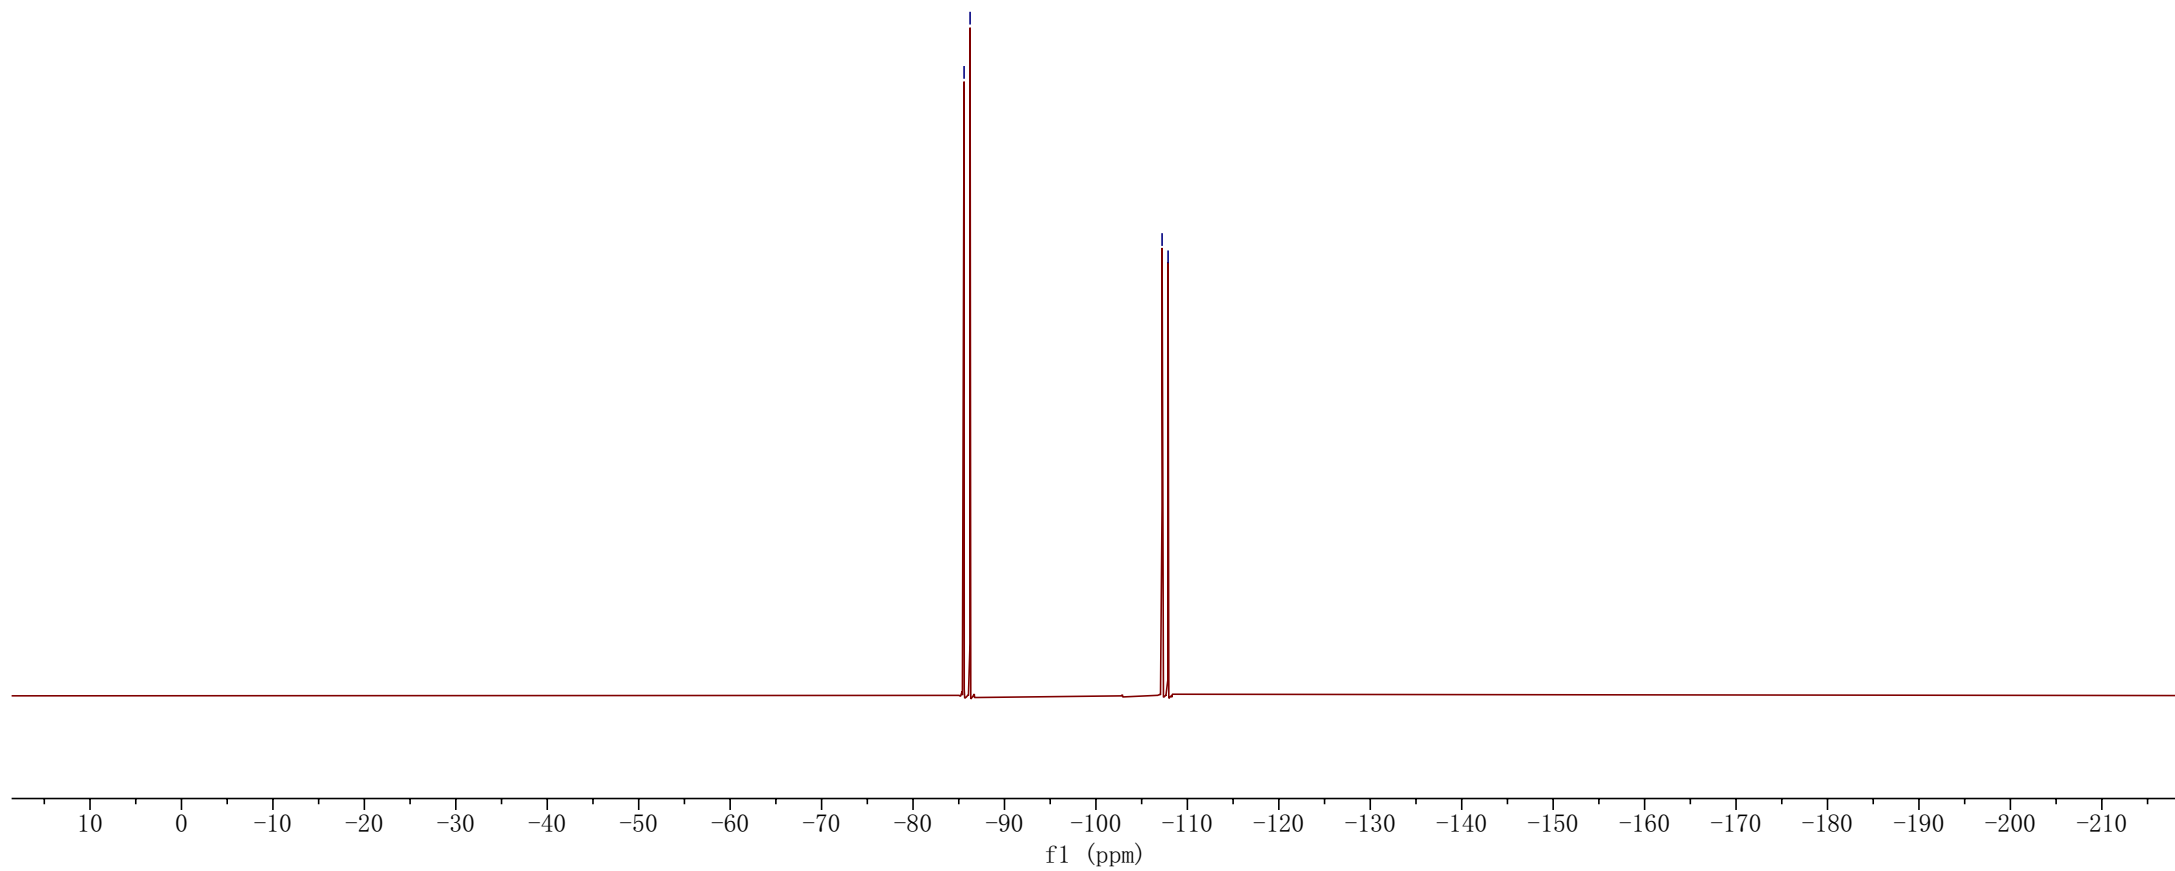

7.879  
7.876  
7.858  
7.855  
7.602  
7.597  
7.589  
7.585  
7.582  
7.579  
7.572  
7.565  
7.559  
7.548  
7.545  
7.484  
7.465  
7.450  
7.430  
7.430  
7.430  
7.411  
7.360  
7.260  
7.040  
7.023  
7.018  
7.013  
6.996  
6.908  
6.890  
6.871  
6.862  
6.842  
5.896  
4.370  
4.365  
4.325  
4.321

7.879  
7.876  
7.858  
7.855  
7.602  
7.589  
7.585  
7.582  
7.579  
7.565  
7.545  
7.484  
7.465  
7.450  
7.430  
7.430  
7.430  
7.411  
7.360  
7.260  
7.040  
7.018  
6.996  
6.908  
6.890  
6.871  
6.871  
6.862  
6.842

3.350  
3.305

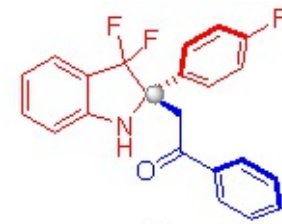

**3ia**  
<sup>1</sup>H NMR (400 MHz, CDCl<sub>3</sub>)

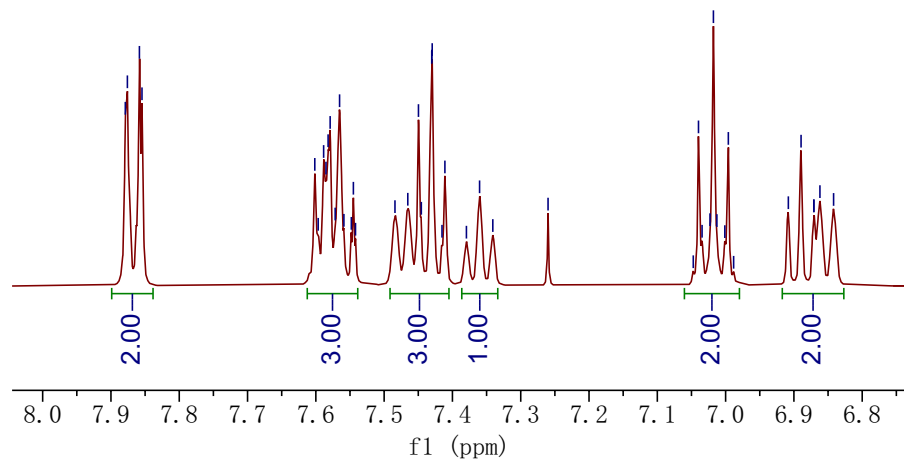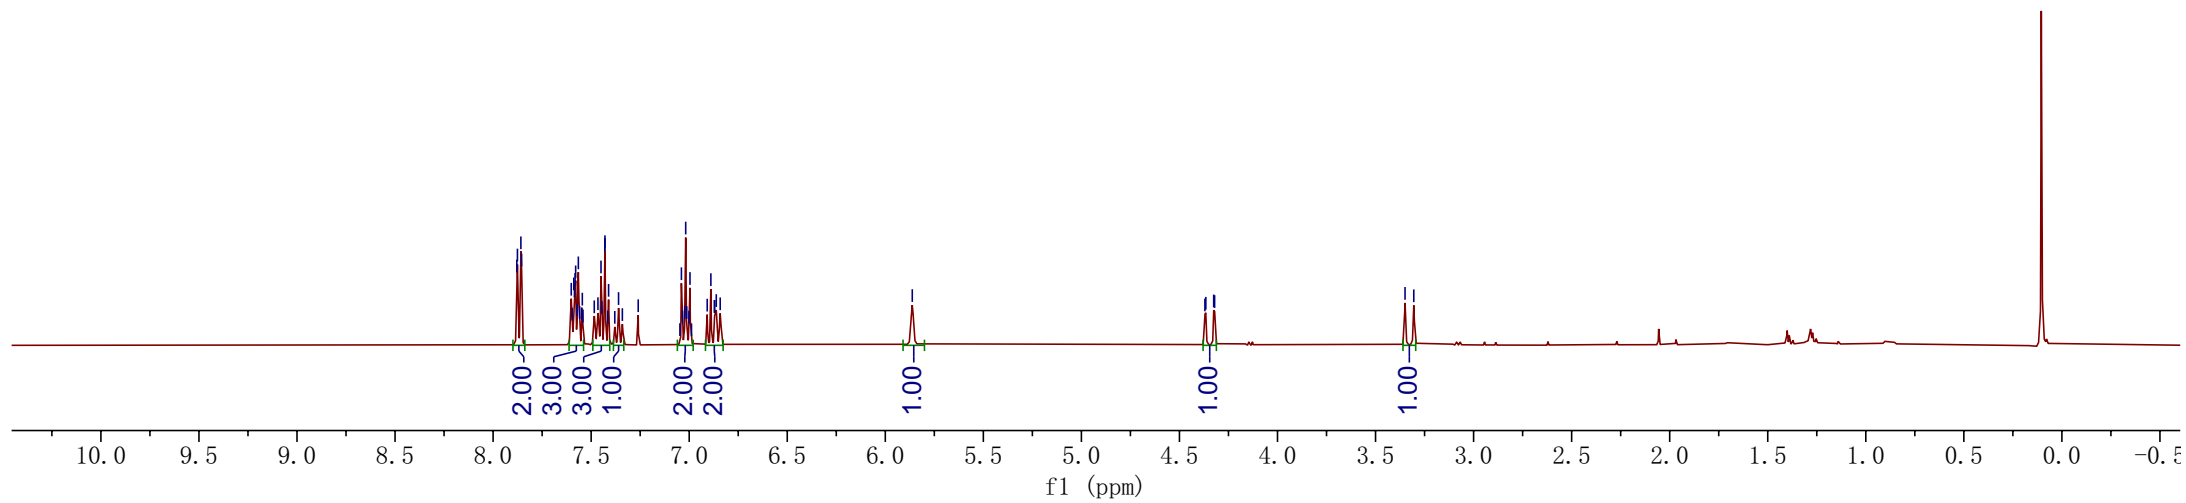



198.25  
198.24

163.49  
161.04

149.50  
149.45  
149.42  
149.37

136.73  
133.79  
133.23  
133.20

133.17  
133.14  
133.08  
129.11

128.69  
128.34  
128.26  
127.95

126.61  
124.35  
124.12  
120.21

119.96  
119.95  
119.70  
119.44

115.23  
115.02  
111.34  
77.32

77.00  
76.69  
71.74  
71.52

71.46  
71.25  
42.02  
42.00

41.93  
41.90

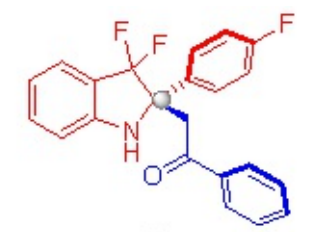

<sup>13</sup>C NMR (100 MHz, CDCl<sub>3</sub>)

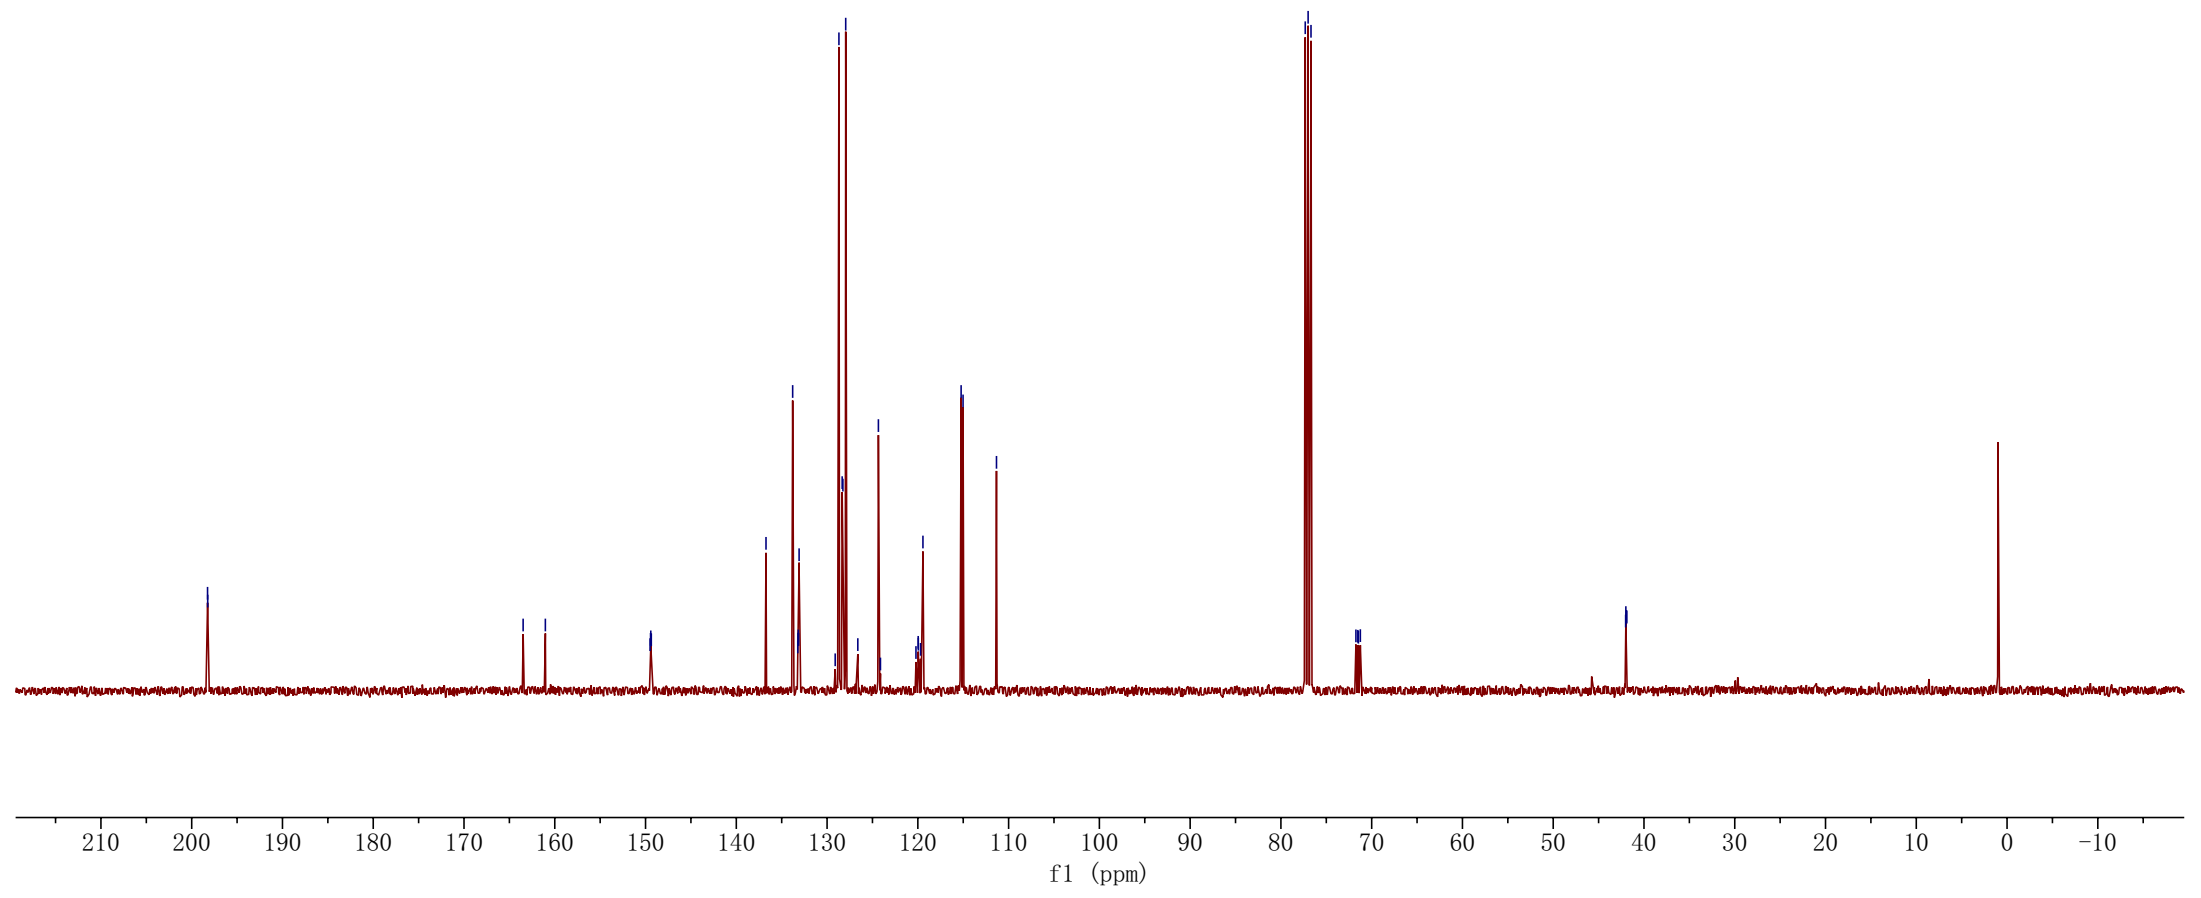

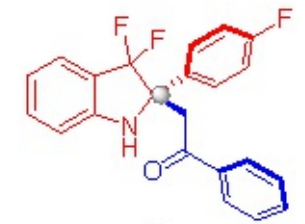

**3ia**  
<sup>19</sup>F NMR (376 MHz, CDCl<sub>3</sub>)

84.20  
84.86  
107.74  
108.40  
114.98

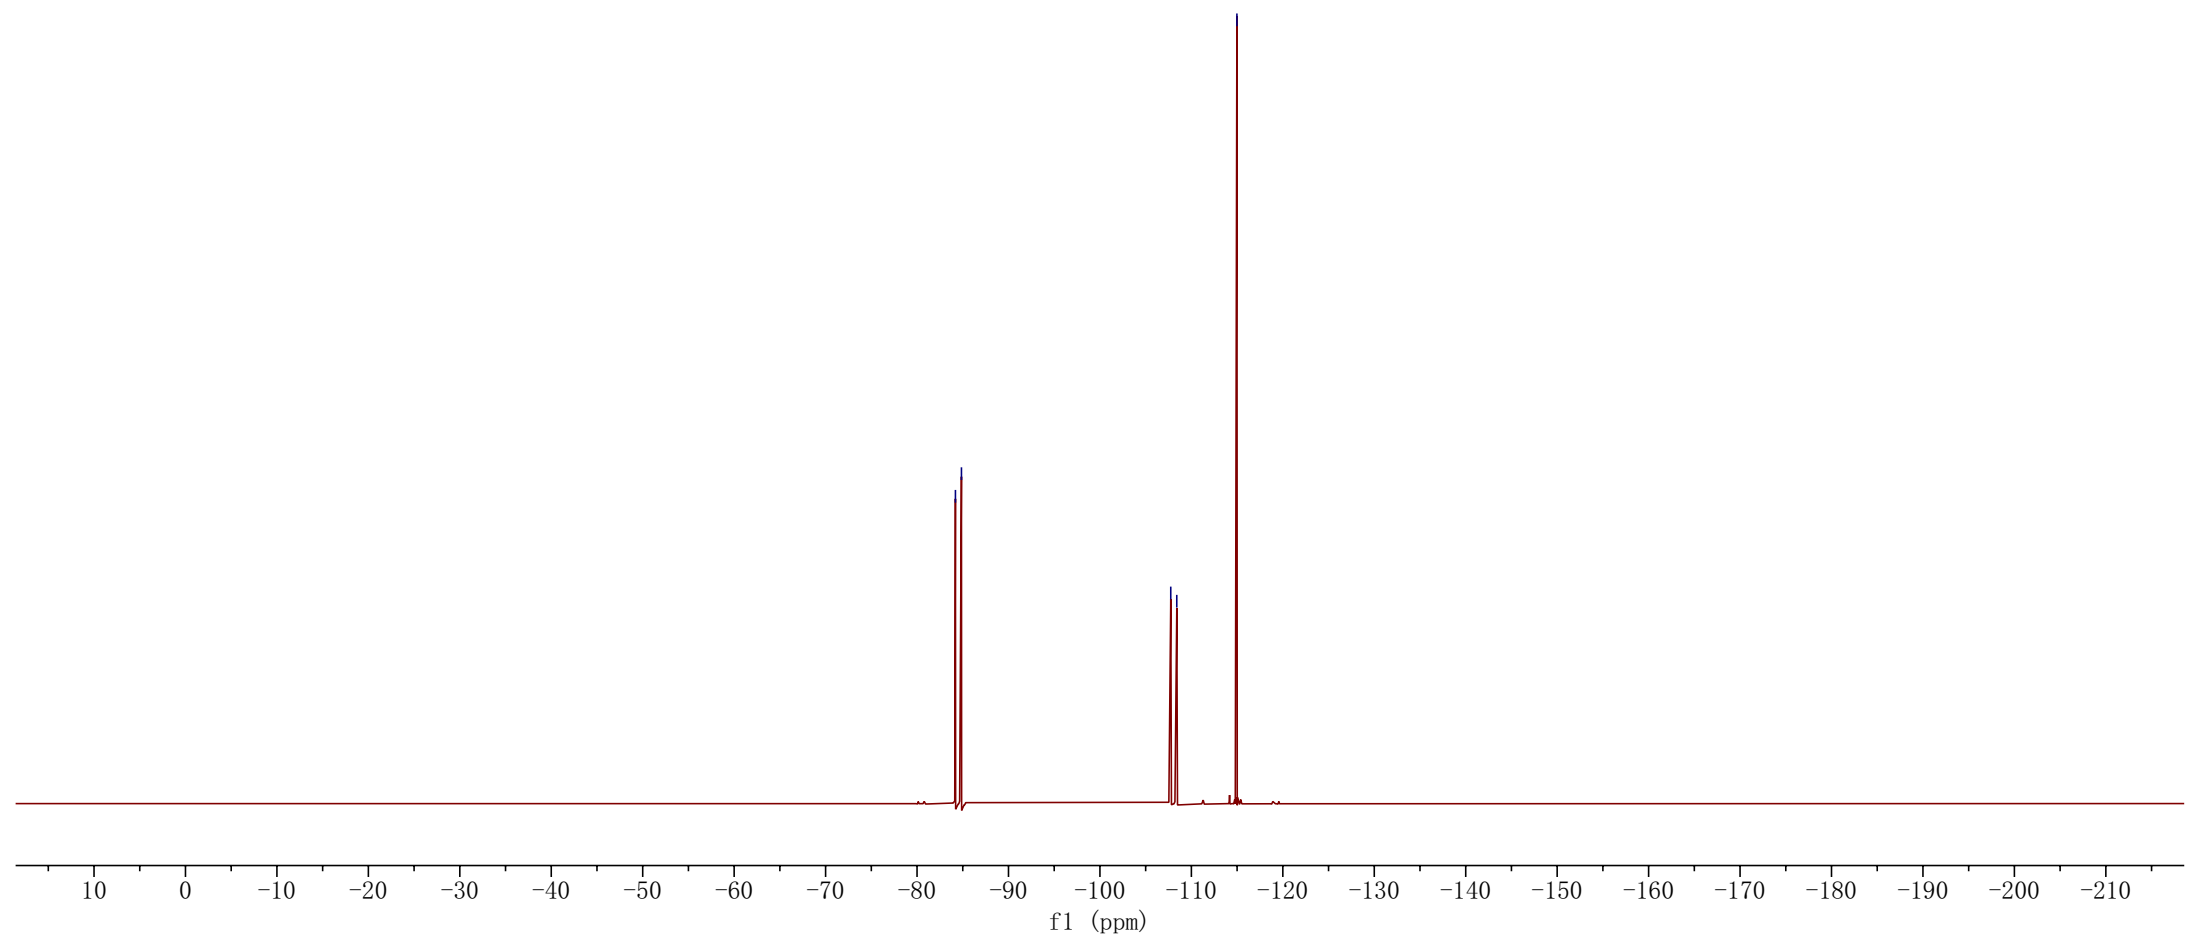

7.881  
7.878  
7.860  
7.856  
7.568  
7.563  
7.558  
7.549  
7.547  
7.542  
7.453  
7.433  
7.433  
7.414  
7.362  
7.362  
7.362  
7.318  
7.312  
7.301  
7.296  
6.911  
6.892  
6.892  
6.874  
6.858  
6.838

4.361  
4.356  
4.316  
4.311

3.367  
3.323

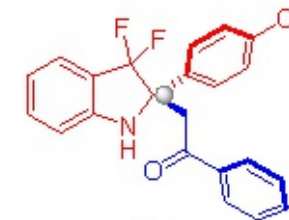

**3ja**  
<sup>1</sup>H NMR (400 MHz, CDCl<sub>3</sub>)

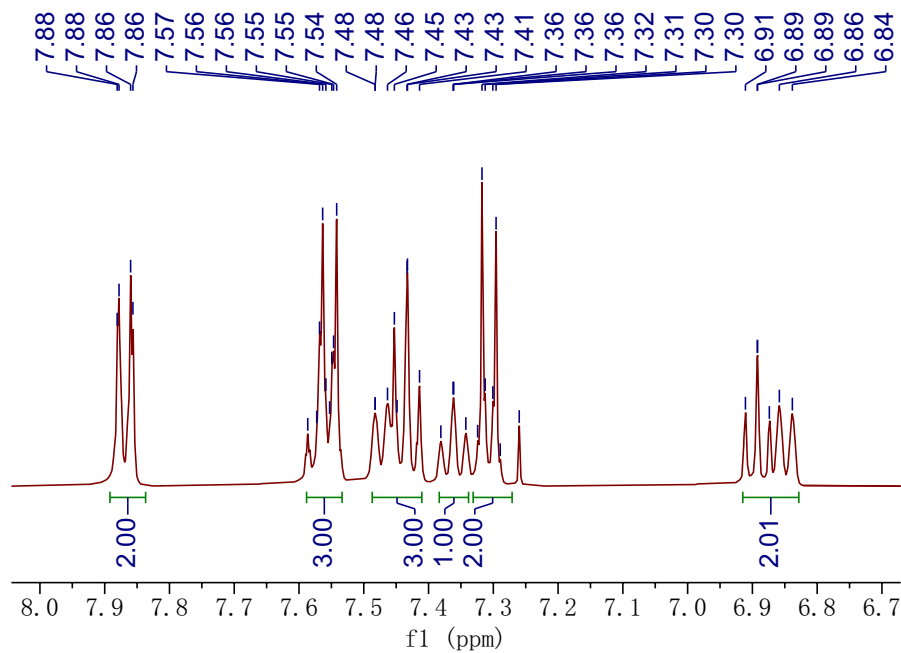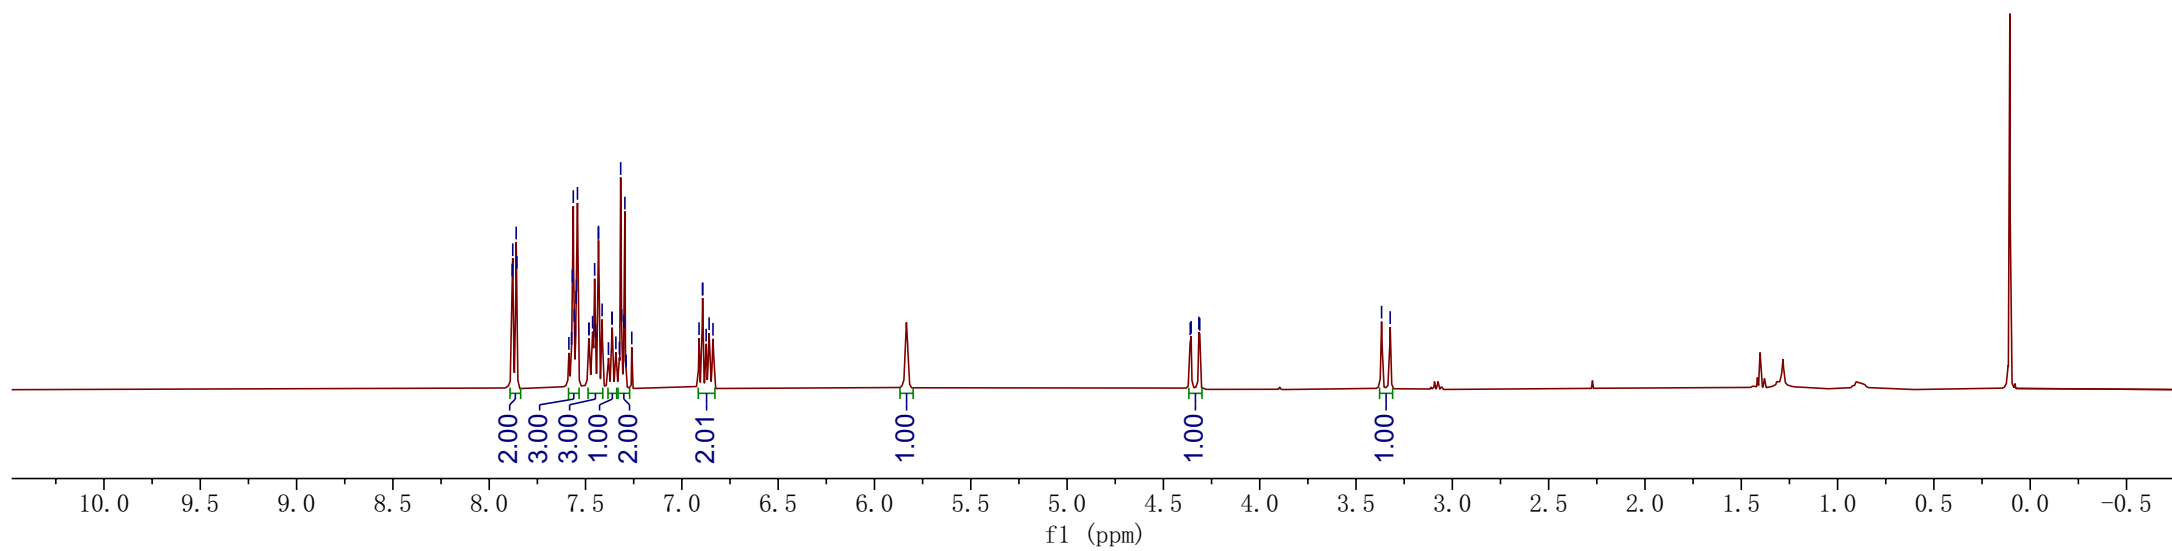

198.09  
198.07

149.46  
149.41  
149.38  
149.33  
136.65  
136.15  
136.09  
133.84  
133.65  
133.12  
129.08  
128.71  
128.42  
128.02  
127.96  
126.58  
124.35  
124.09  
120.13  
119.89  
119.87  
119.63  
119.48  
111.33

77.32  
77.00  
76.68  
71.77  
71.56  
71.50  
71.28

42.02  
41.99  
41.92  
41.90

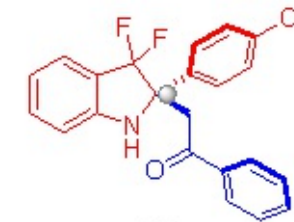

**3ja**

<sup>13</sup>C NMR (100 MHz, CDCl<sub>3</sub>)

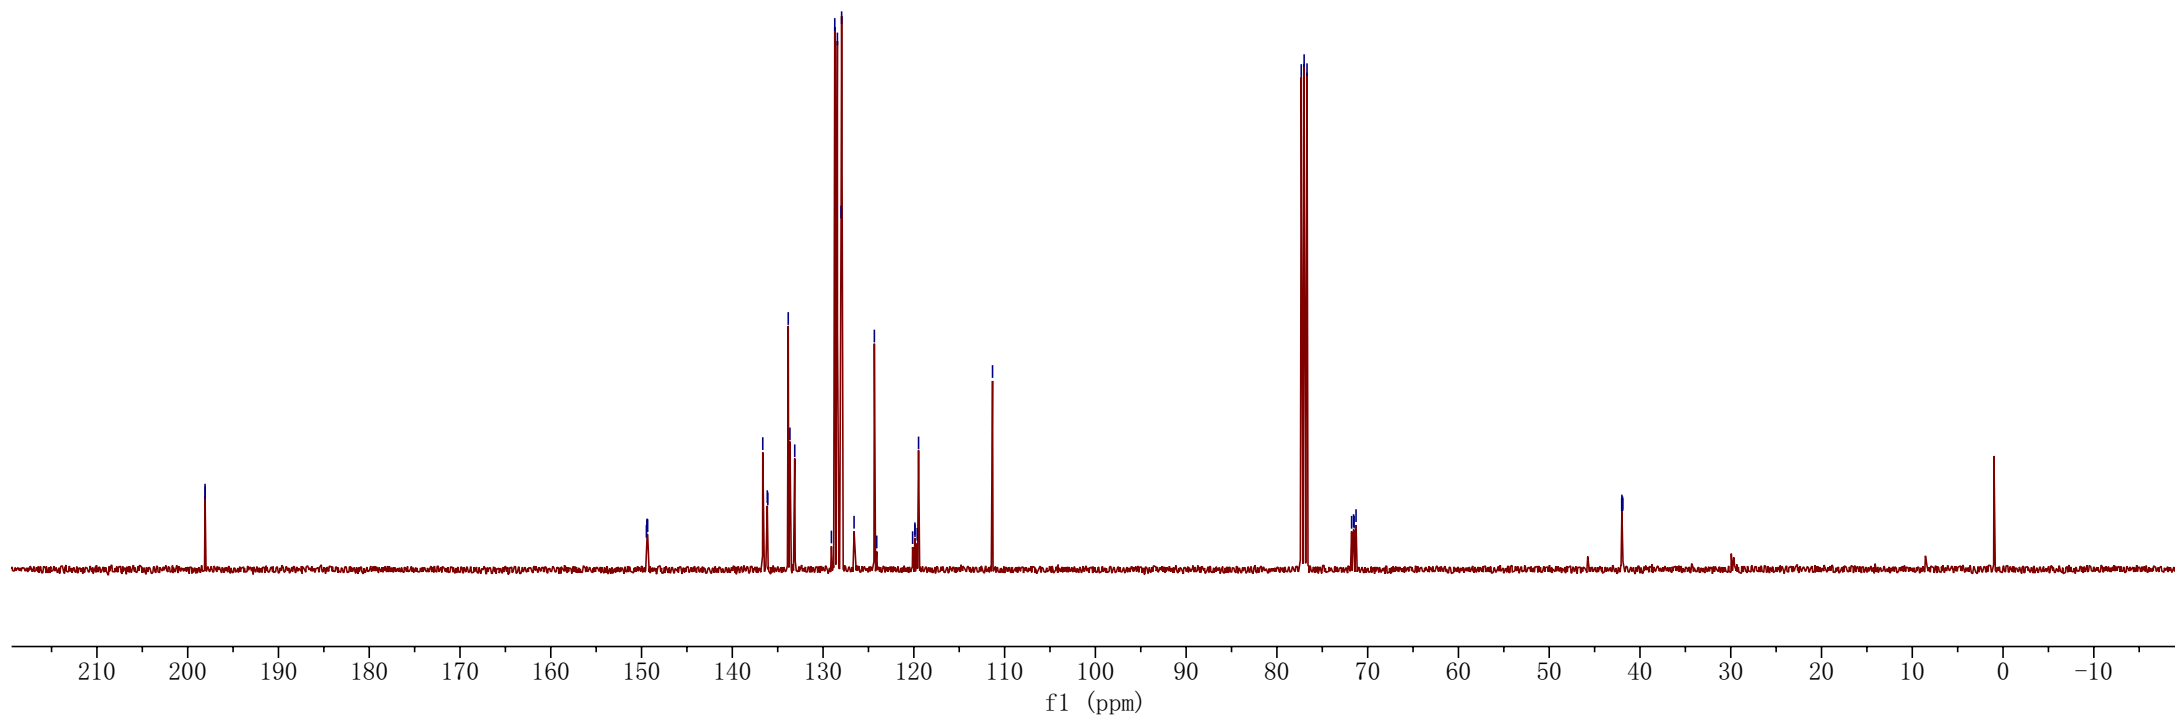

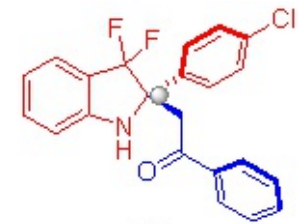

**3ja**  
<sup>19</sup>F NMR (376 MHz, CDCl<sub>3</sub>)

-84.08  
-84.74

-107.44  
-108.10

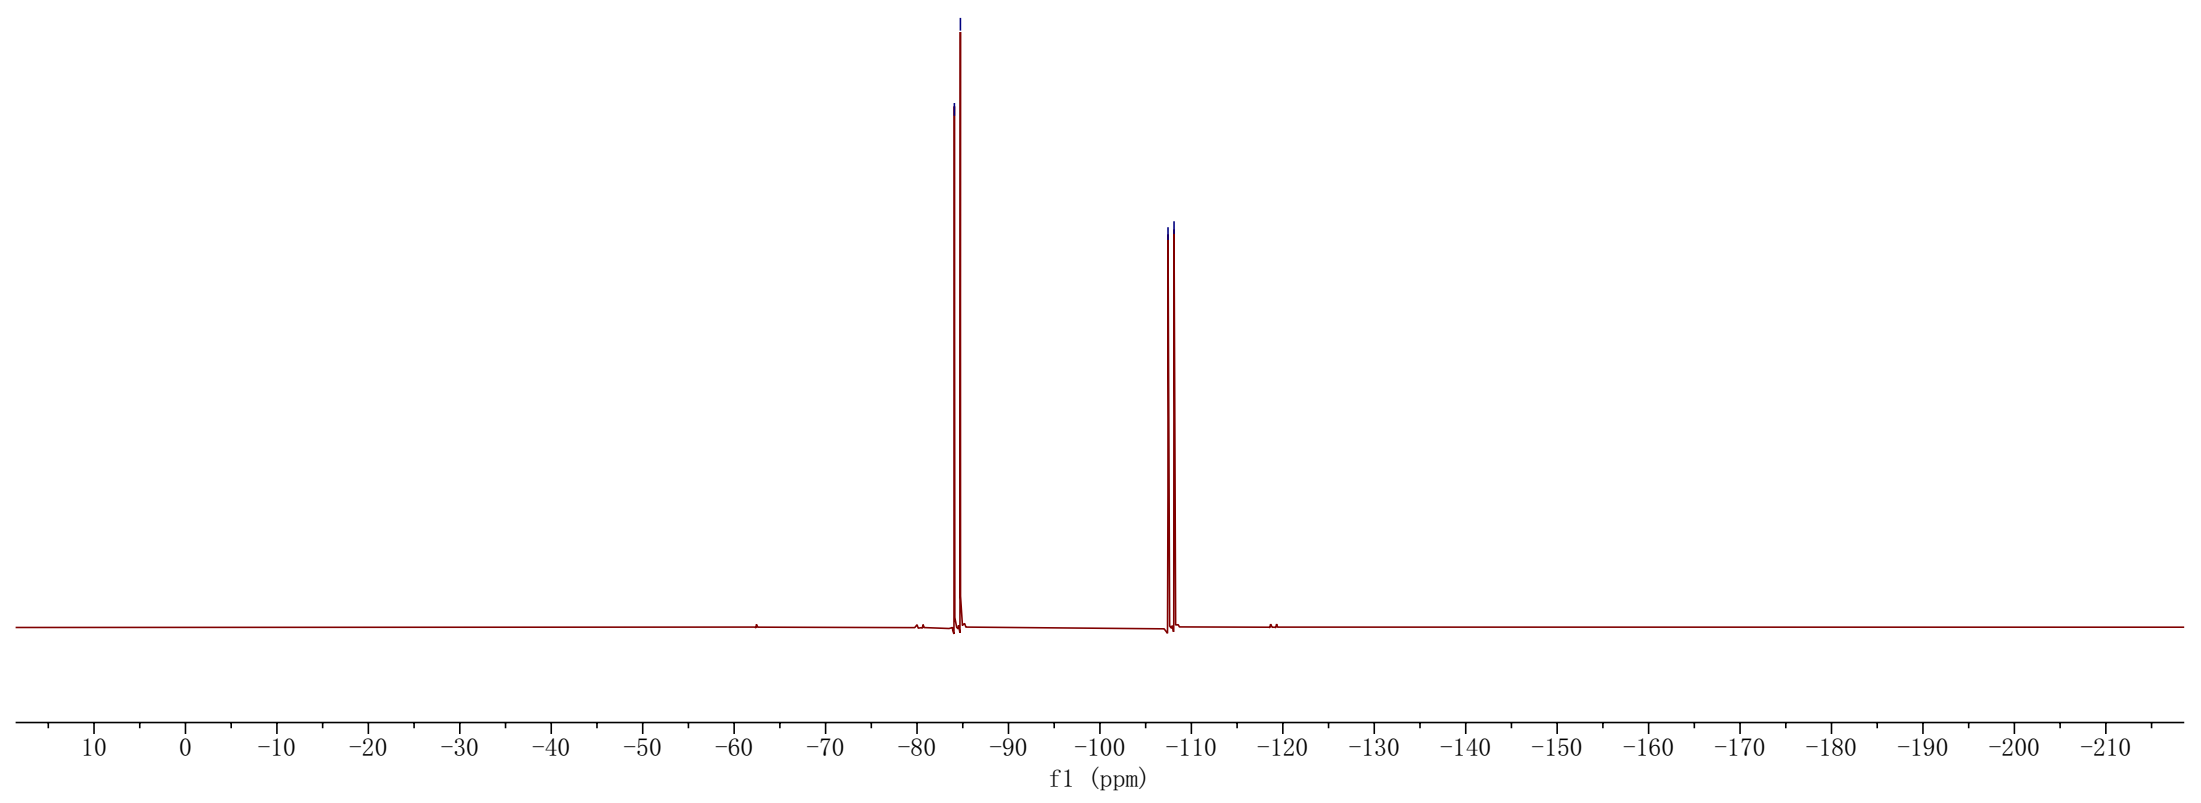

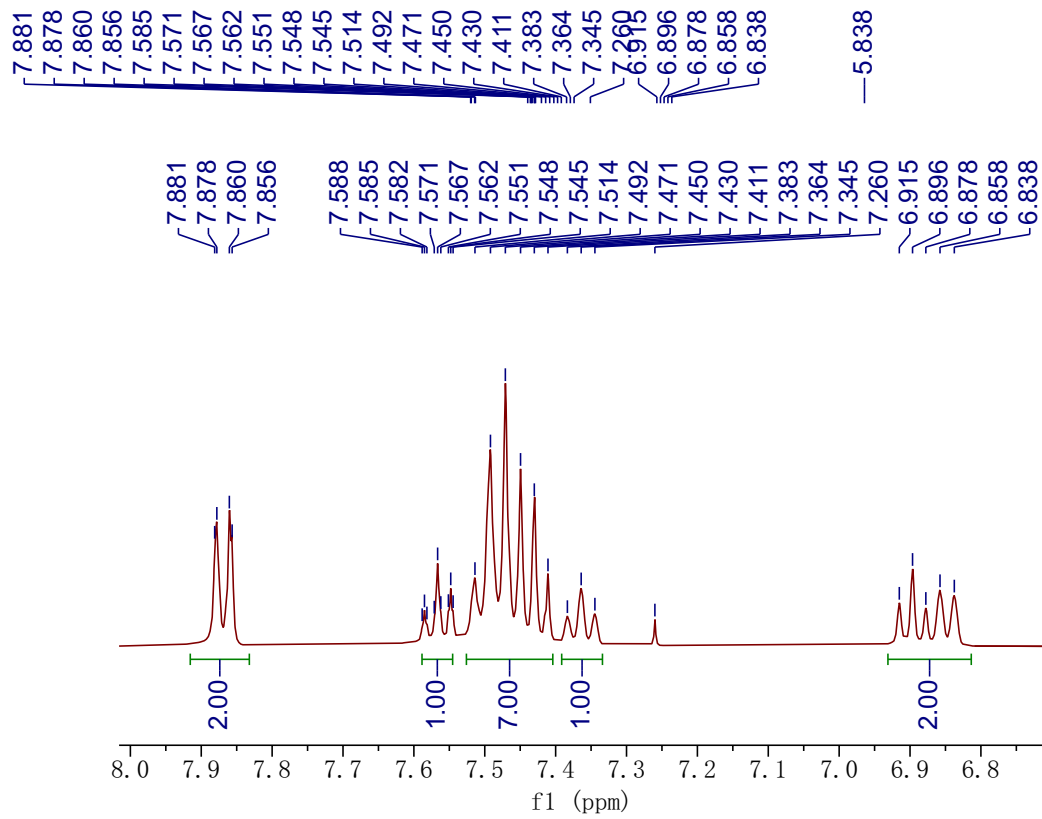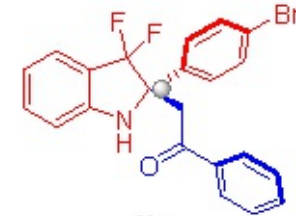

**3ka**  
<sup>1</sup>H NMR (400 MHz, CDCl<sub>3</sub>)

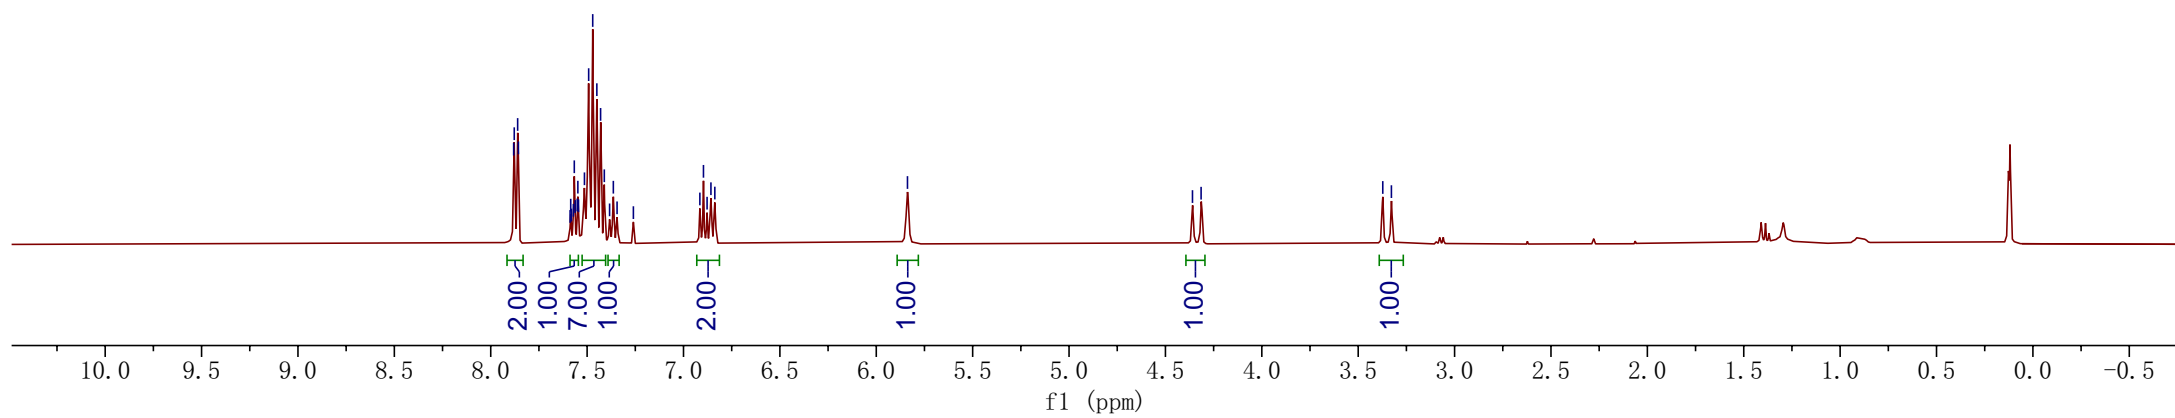

198.02  
198.01  
149.43  
149.37  
149.35  
149.29  
136.70  
136.65  
136.58  
133.83  
133.11  
131.34  
129.02  
128.69  
128.35  
127.93  
126.53  
124.32  
124.03  
121.86  
120.08  
119.83  
119.57  
119.47  
111.32

77.32  
77.00  
76.68  
71.80  
71.59  
71.52  
71.31

41.96  
41.94  
41.87  
41.85

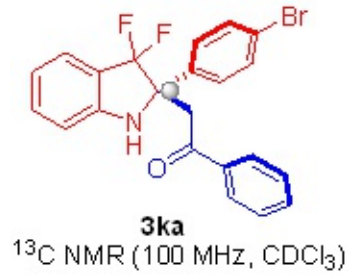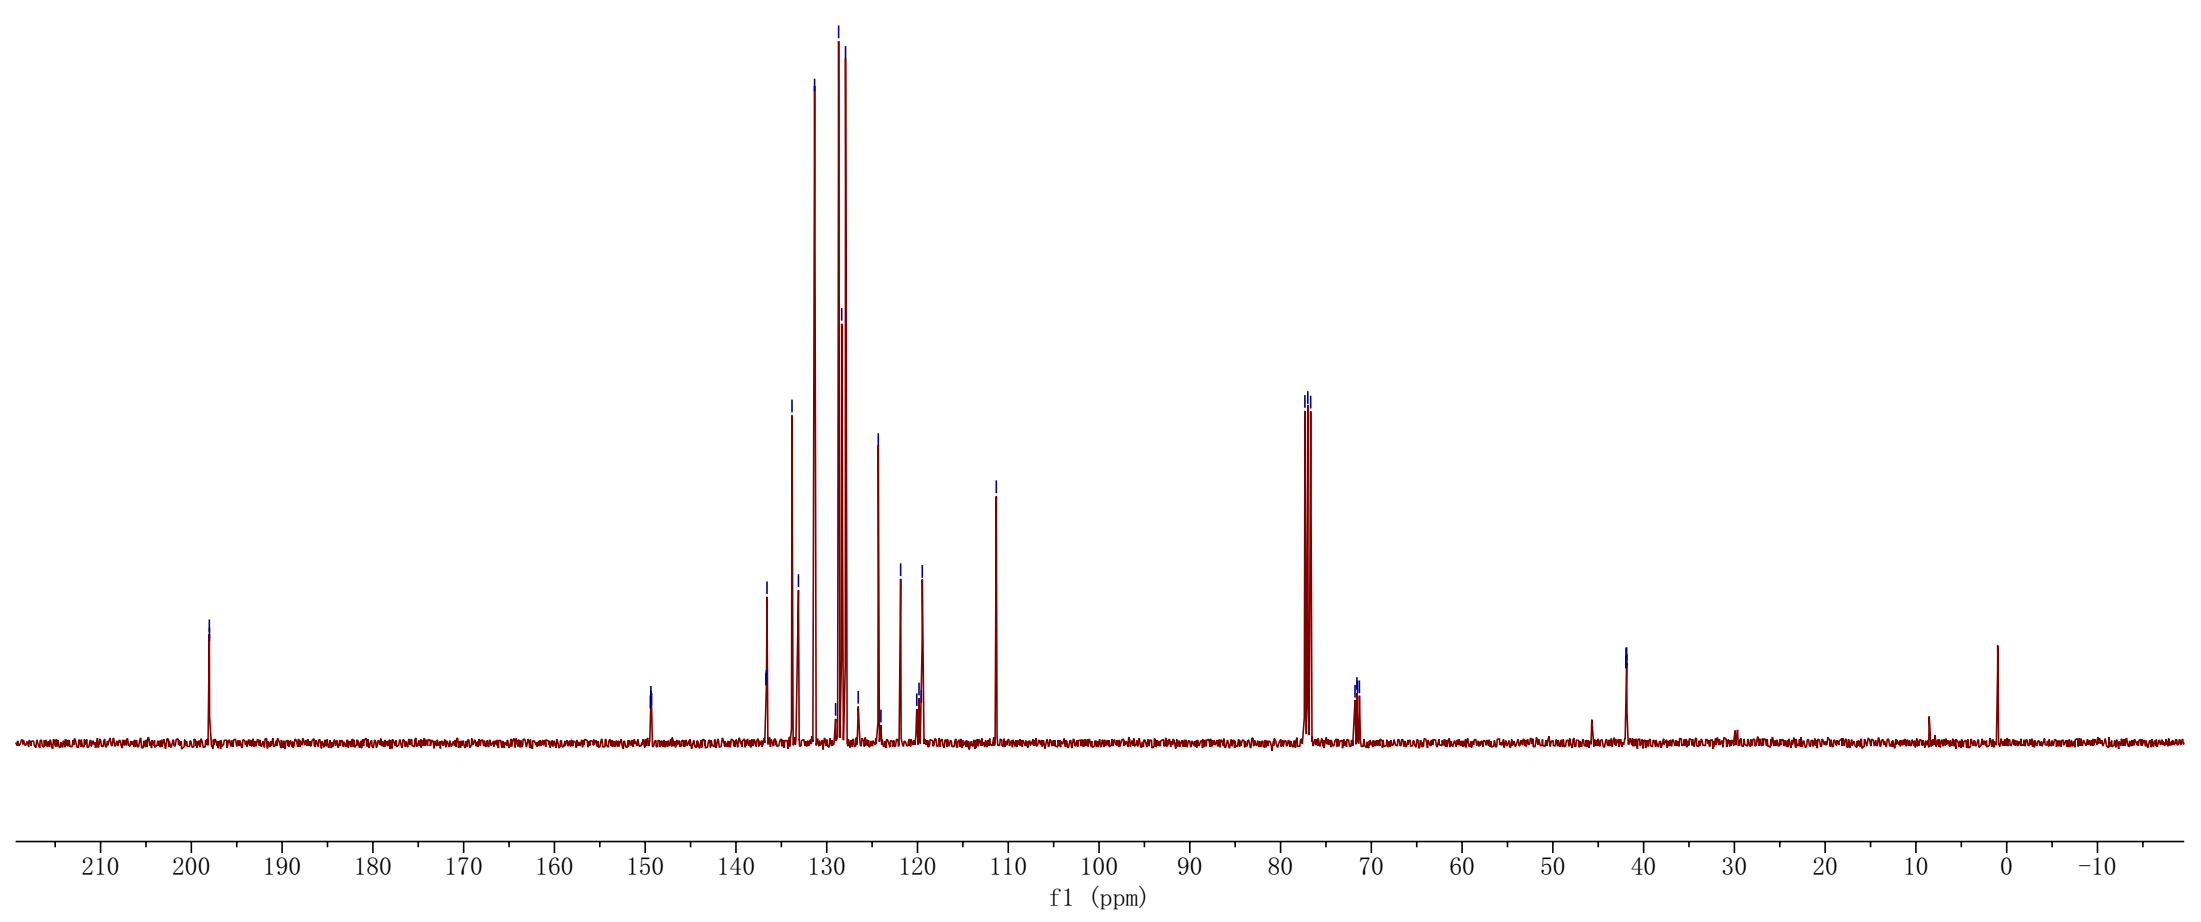

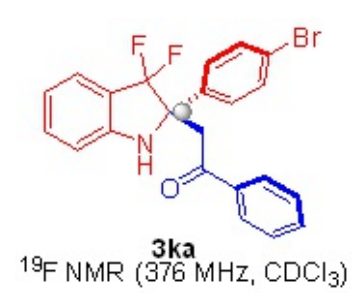

--83.94  
--83.97  
--84.60  
--84.63

--107.35  
--107.39  
--108.01  
--108.05

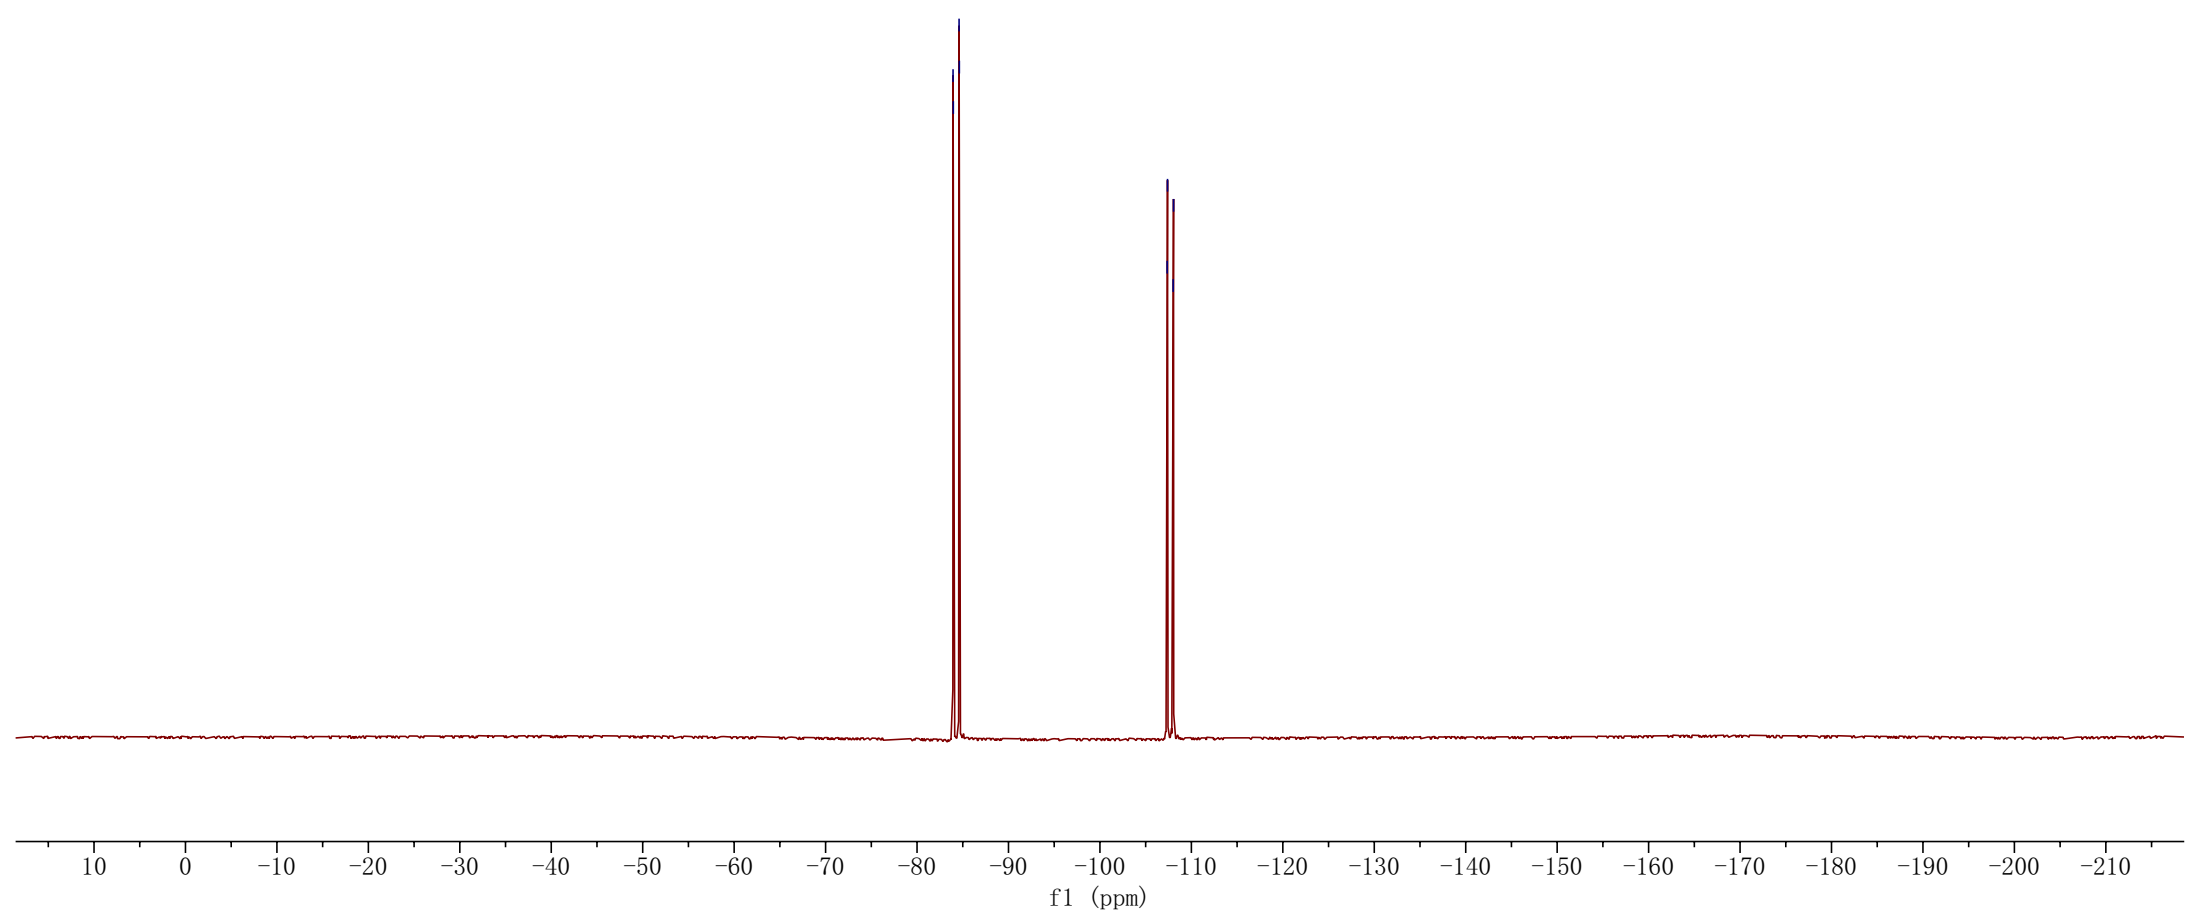



7.892  
7.889  
7.872  
7.868  
7.787  
7.766  
7.629  
7.608  
7.596  
7.578  
7.578  
7.563  
7.559  
7.513  
7.494  
7.459  
7.439  
7.420  
7.408  
7.389  
7.370  
6.942  
6.923  
6.904  
6.887  
6.882  
6.867  
6.862  
—5.862

4.421  
4.417  
4.376  
4.371

3.452  
3.407

7.892  
7.889  
7.872  
7.868  
7.787  
7.766  
7.629  
7.608  
7.596  
7.578  
7.578  
7.563  
7.559  
7.556  
7.513  
7.494  
7.459  
7.439  
7.420  
7.408  
7.389  
7.370  
7.261  
6.942  
6.923  
6.904  
6.887  
6.882  
6.867  
6.862

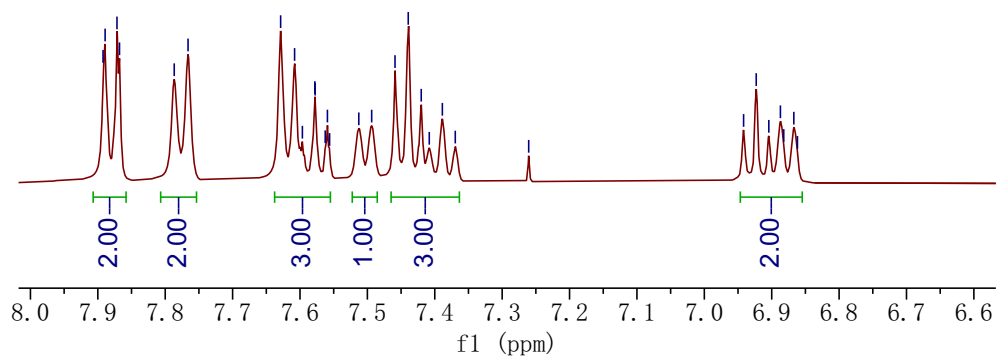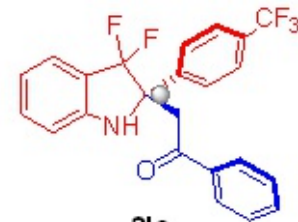

<sup>1</sup>H NMR (400 MHz, CDCl<sub>3</sub>)

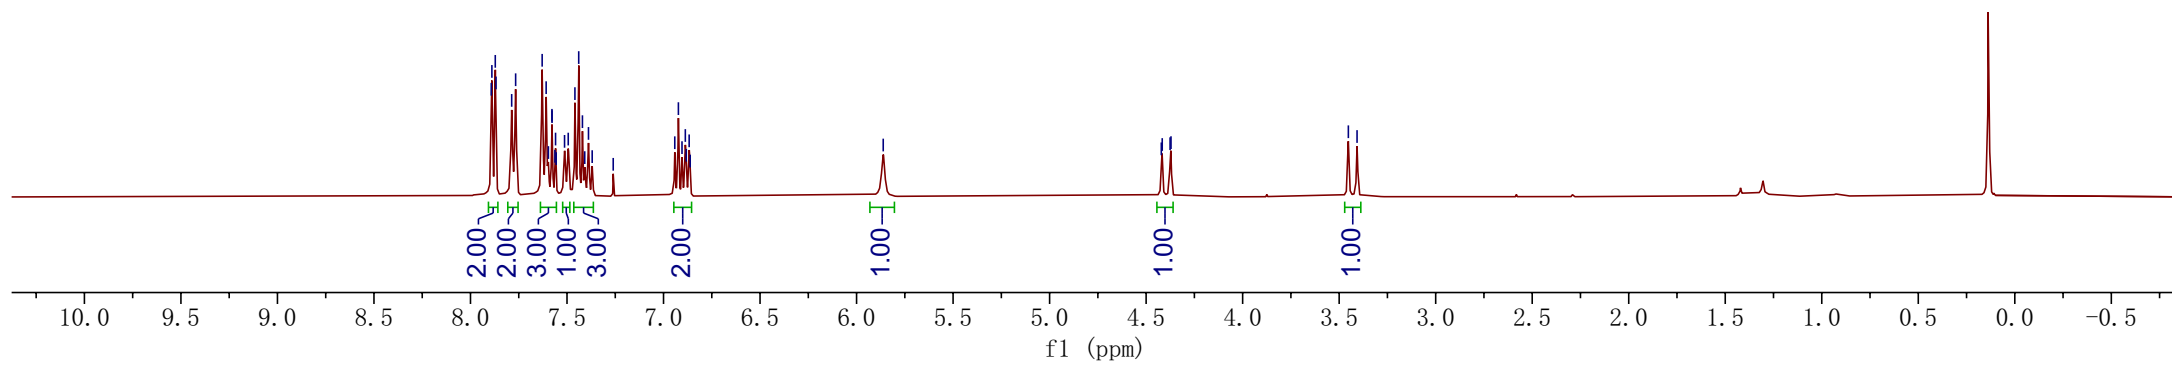

197.89  
197.87  
149.38  
149.33  
149.30  
149.24  
141.76  
141.70  
136.40  
133.95  
133.22  
130.30  
129.98  
129.66  
129.34  
129.13  
128.73  
127.94  
127.01  
126.63  
125.39  
125.25  
125.22  
125.18  
125.14  
124.35  
124.13  
122.69  
119.94  
119.69  
119.68  
119.63  
119.43  
111.41  
77.32  
77.00  
76.68  
71.92  
71.71  
71.64  
71.43

42.27  
42.25  
42.18  
42.15

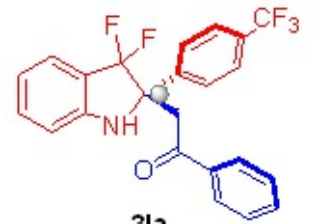

**3a**  
<sup>13</sup>C NMR (100 MHz, CDCl<sub>3</sub>)

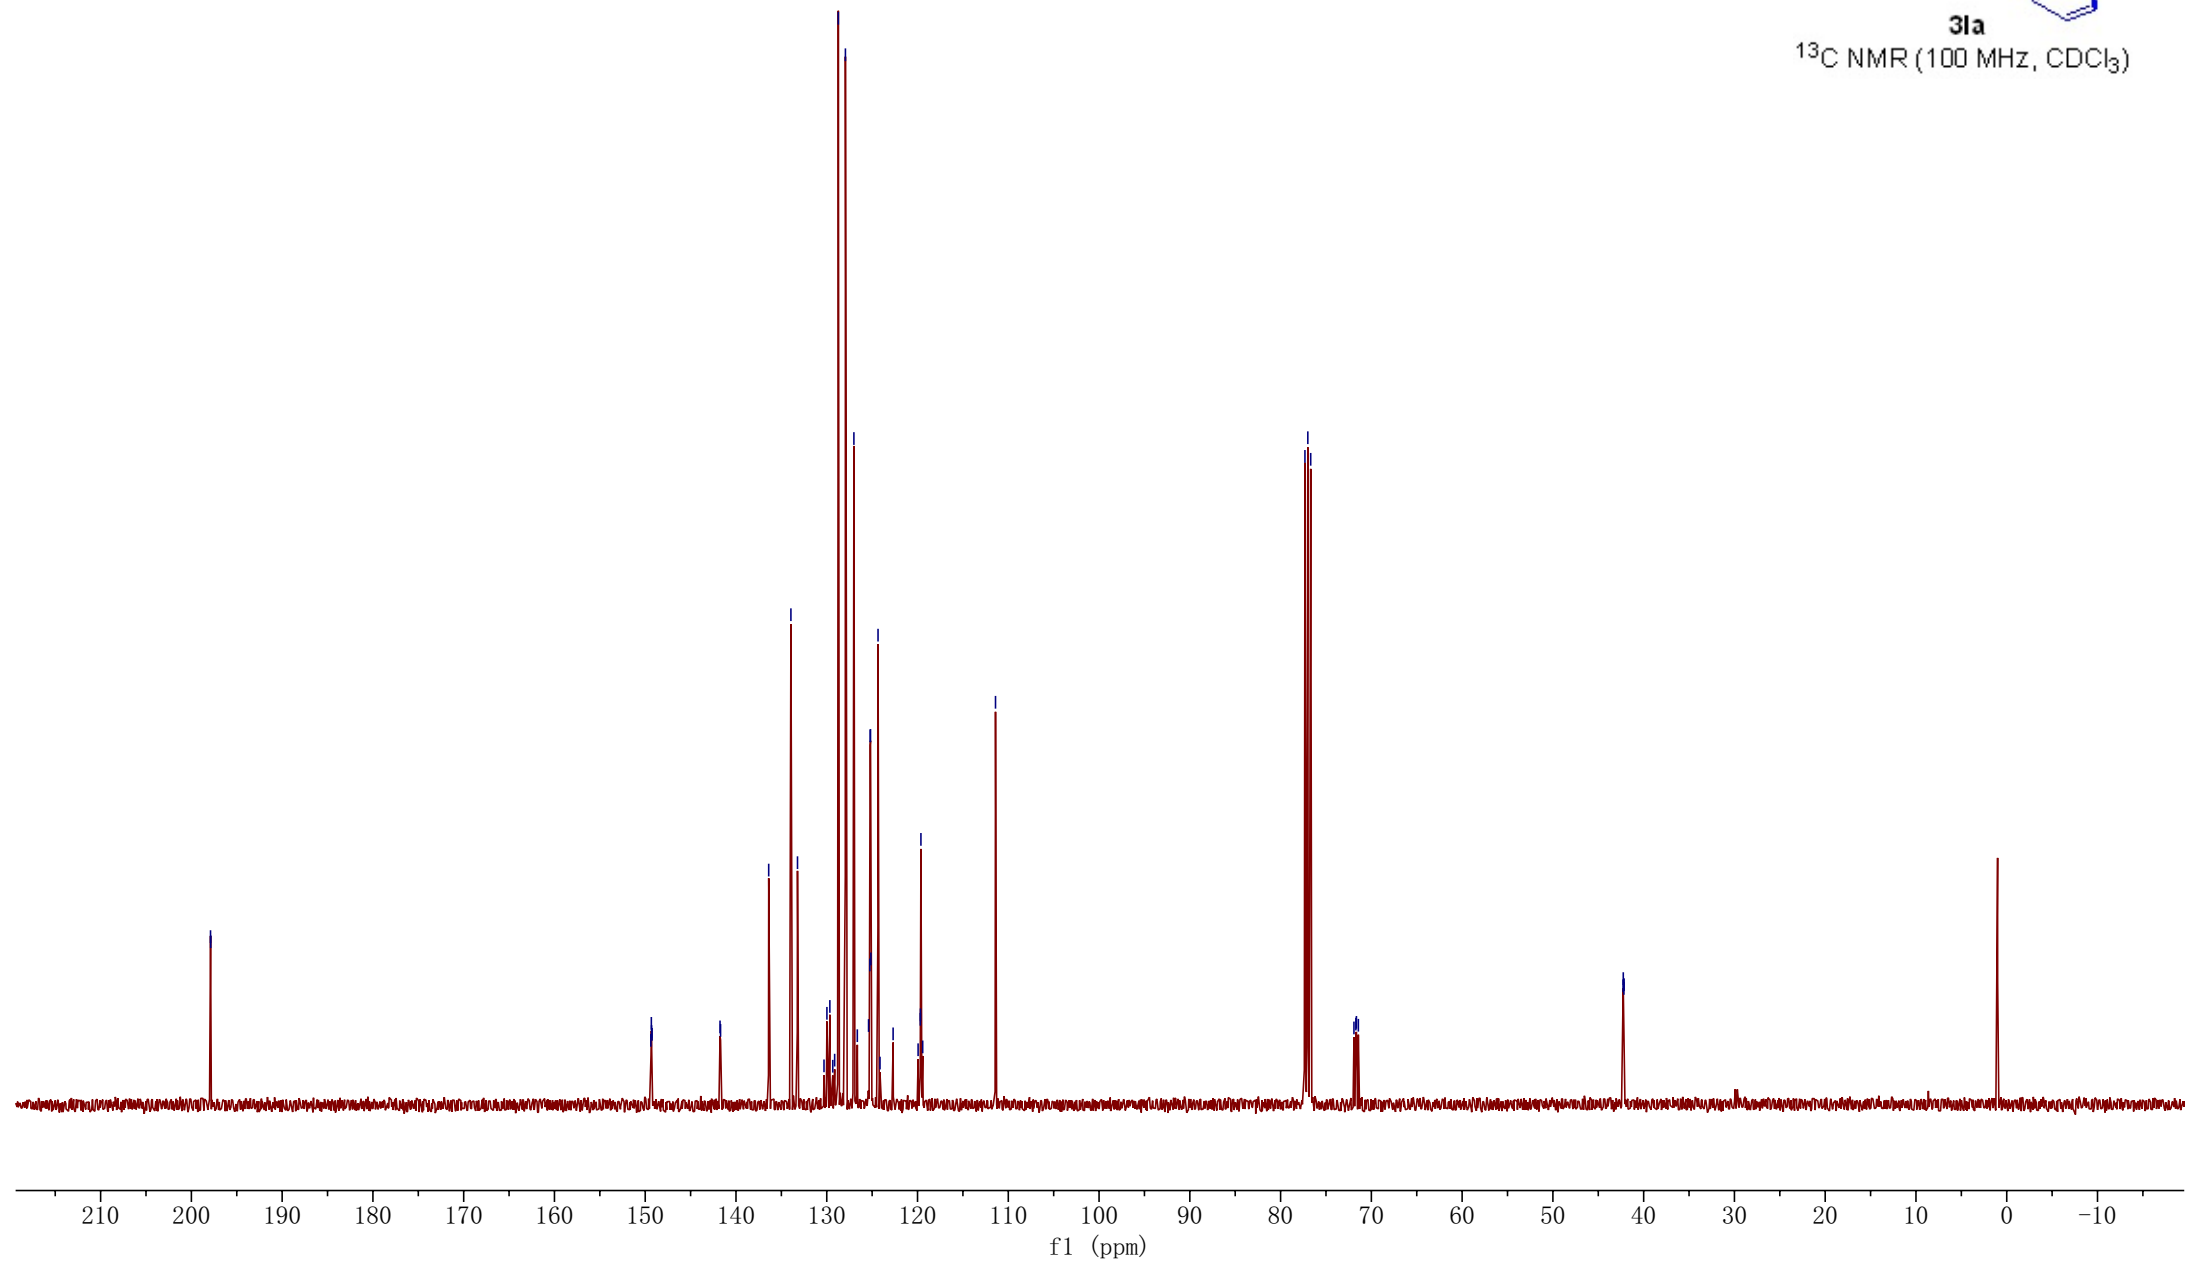

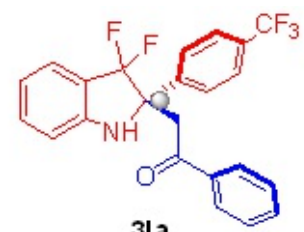

<sup>19</sup>F NMR (376 MHz, CDCl<sub>3</sub>)

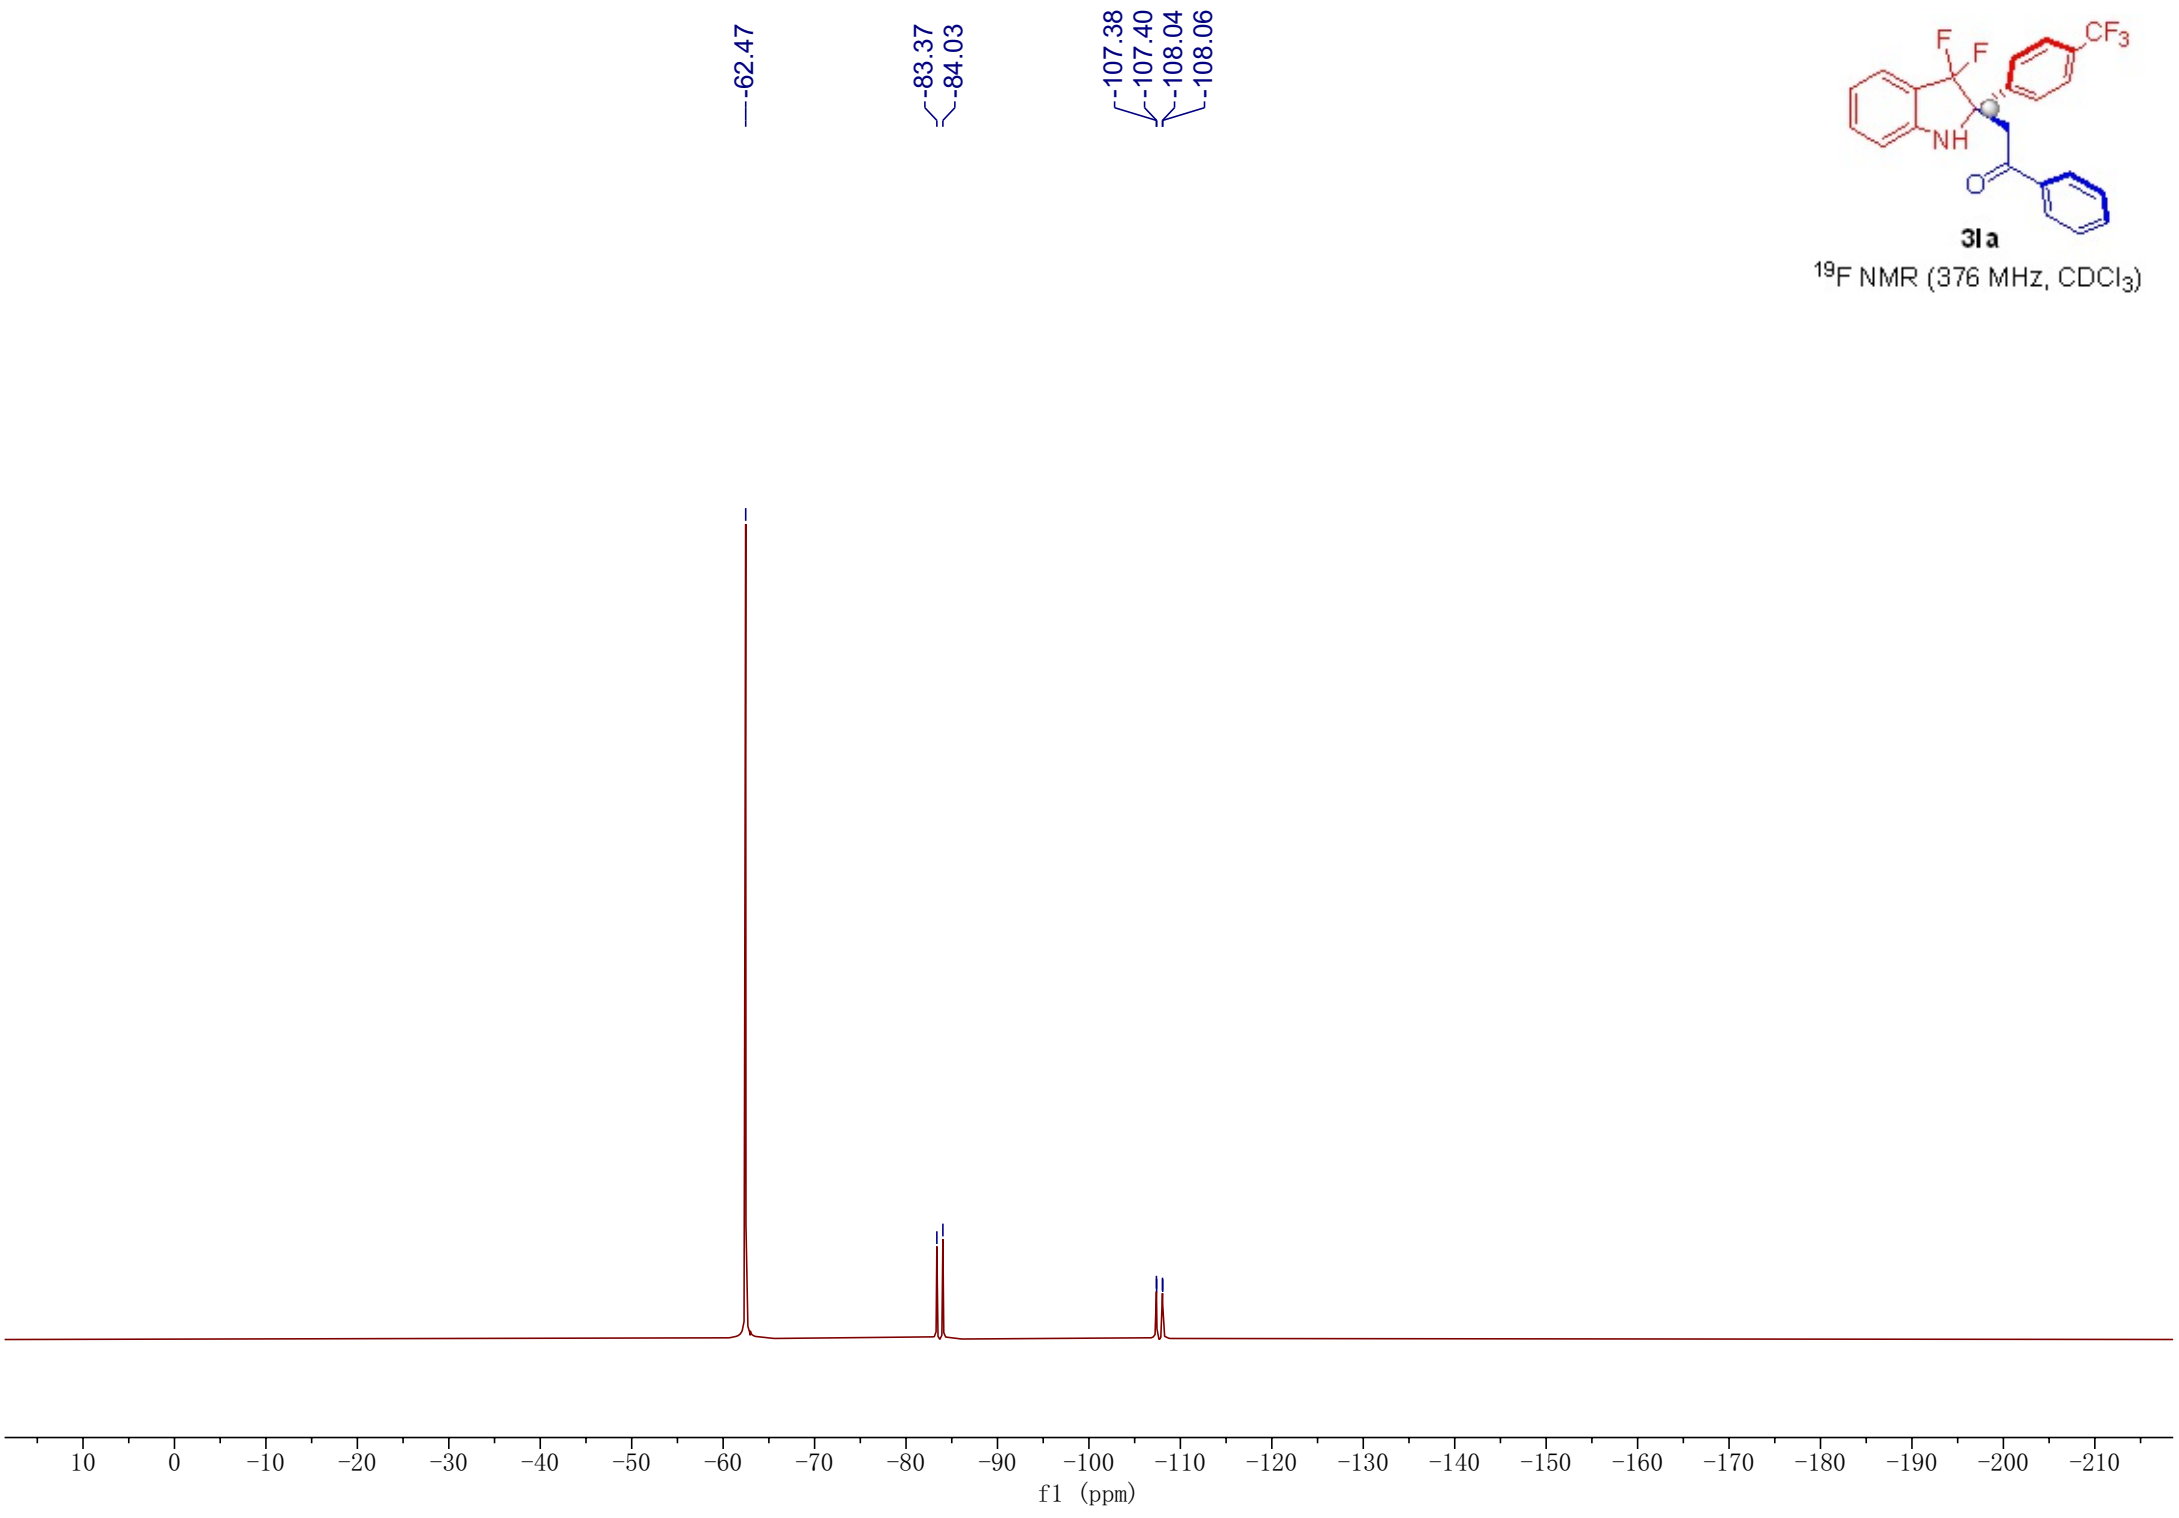

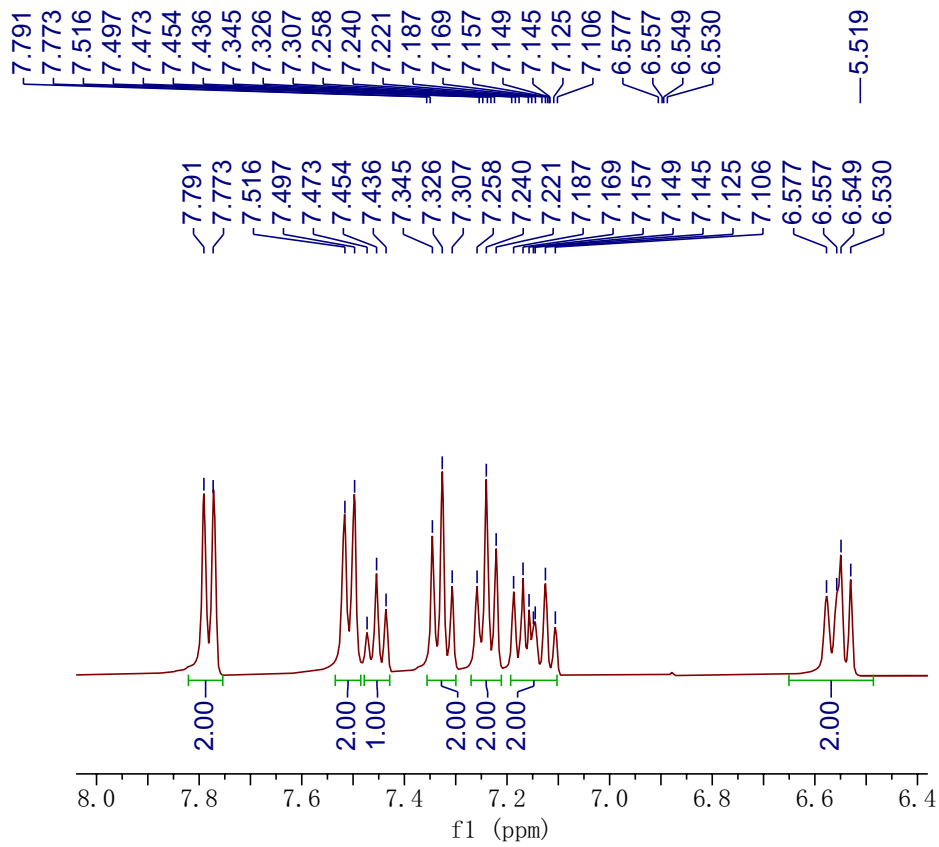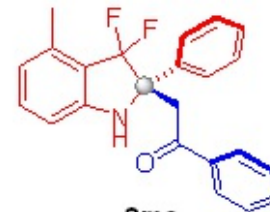

**3ma**  
<sup>1</sup>H NMR (400 MHz, CDCl<sub>3</sub>)

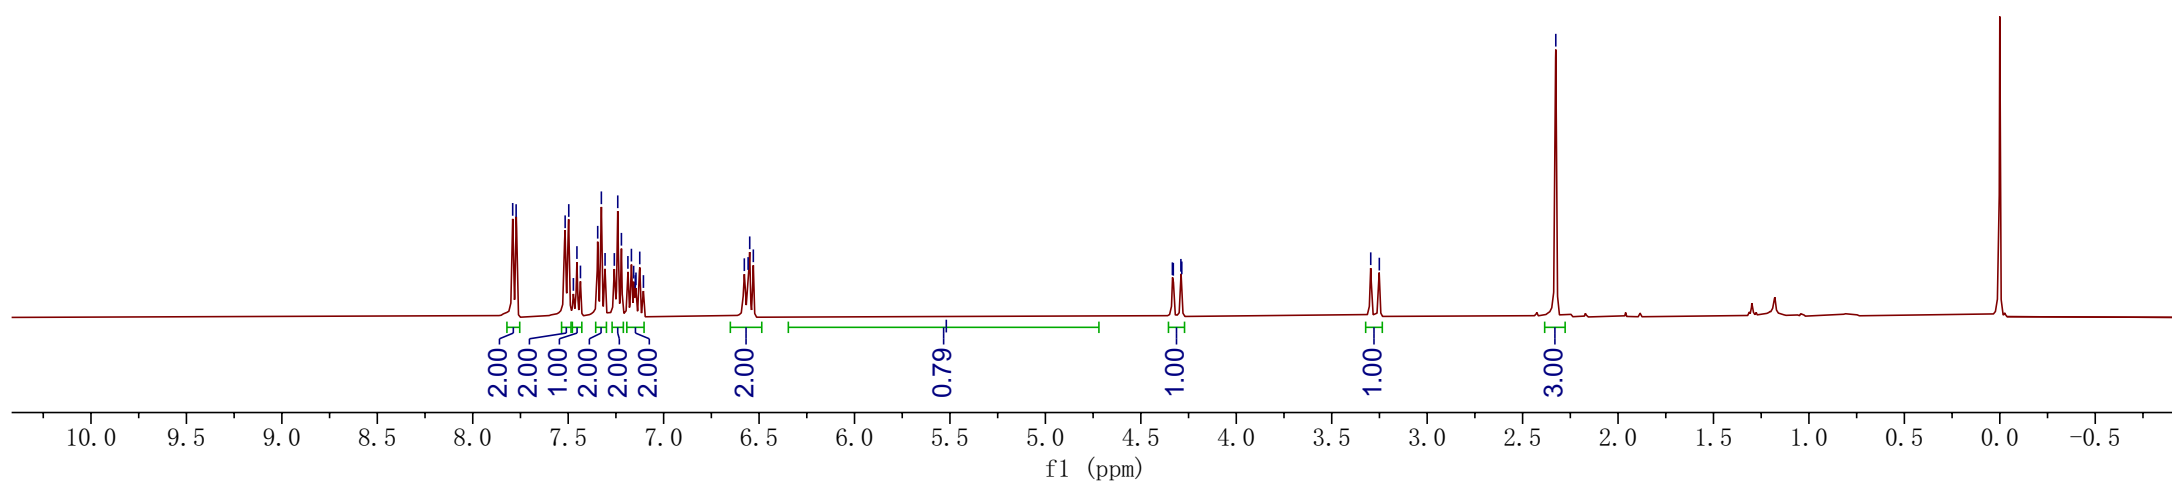

198.33  
198.31  
149.95  
149.90  
149.88  
149.82  
137.65  
137.59  
137.24  
137.22  
136.83  
133.62  
132.84  
130.53  
128.62  
128.18  
128.02  
127.96  
127.64  
126.48  
125.53  
121.04  
118.13  
117.89  
117.65  
108.57

77.32  
77.00  
76.68  
71.68  
71.47  
71.41  
71.20

42.29  
42.27  
42.19  
42.16

17.17

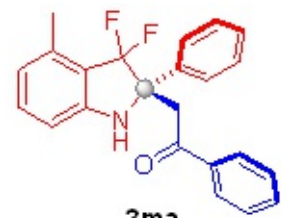

<sup>13</sup>C NMR (100 MHz, CDCl<sub>3</sub>)

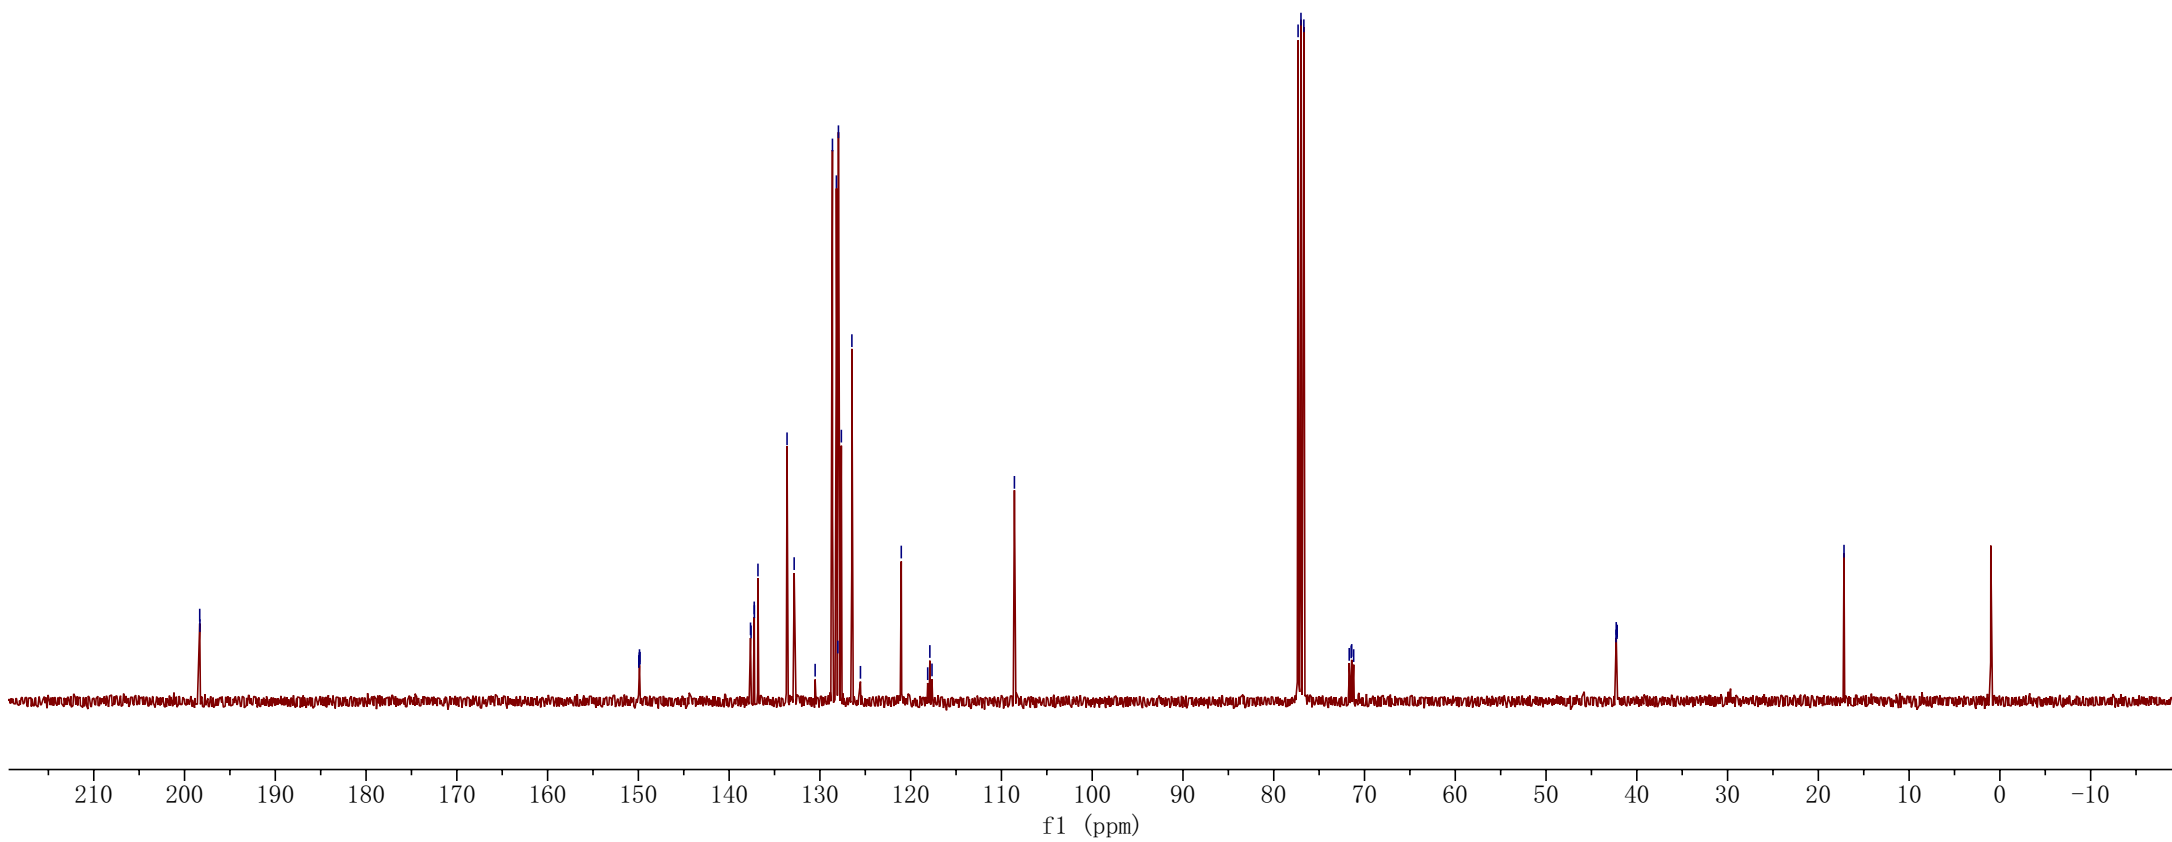

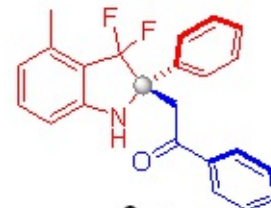

**3ma**  
<sup>19</sup>F NMR (376 MHz, CDCl<sub>3</sub>)

-86.21  
-86.87

-104.85  
-105.51

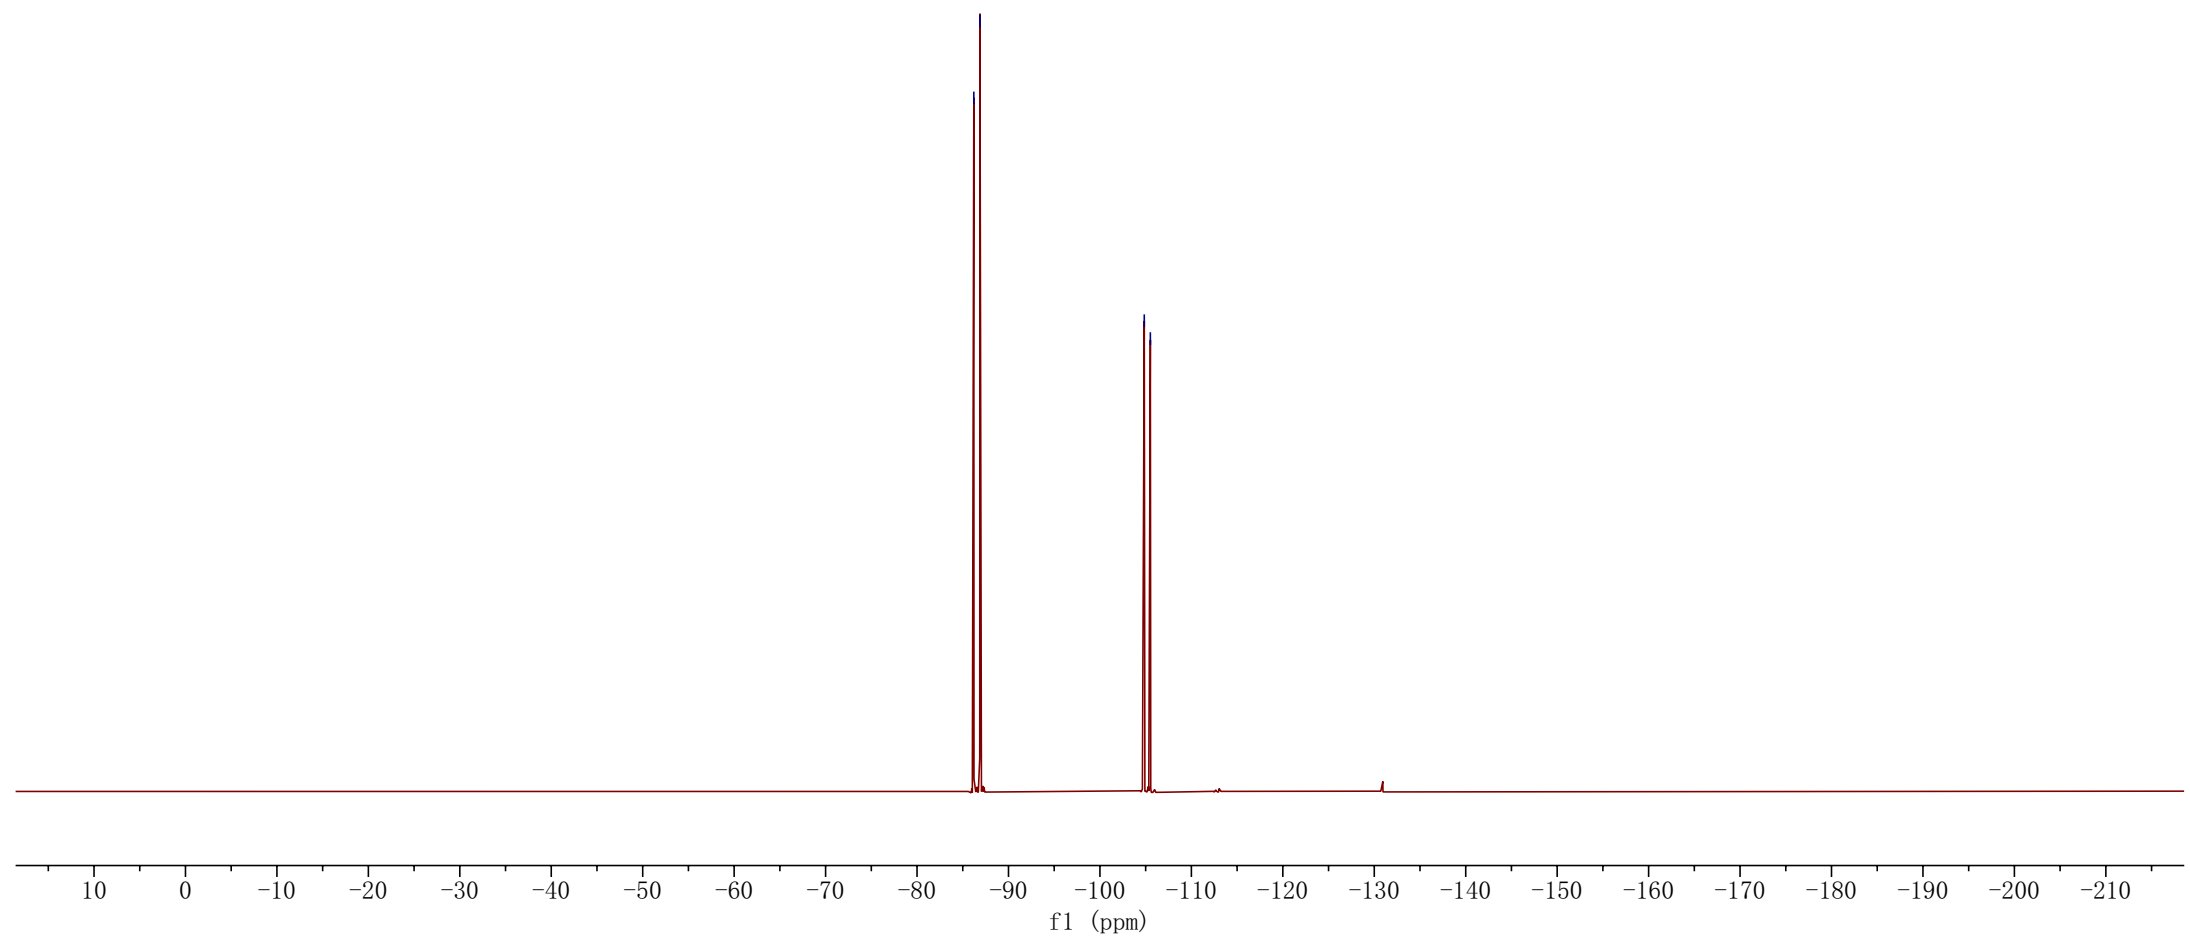

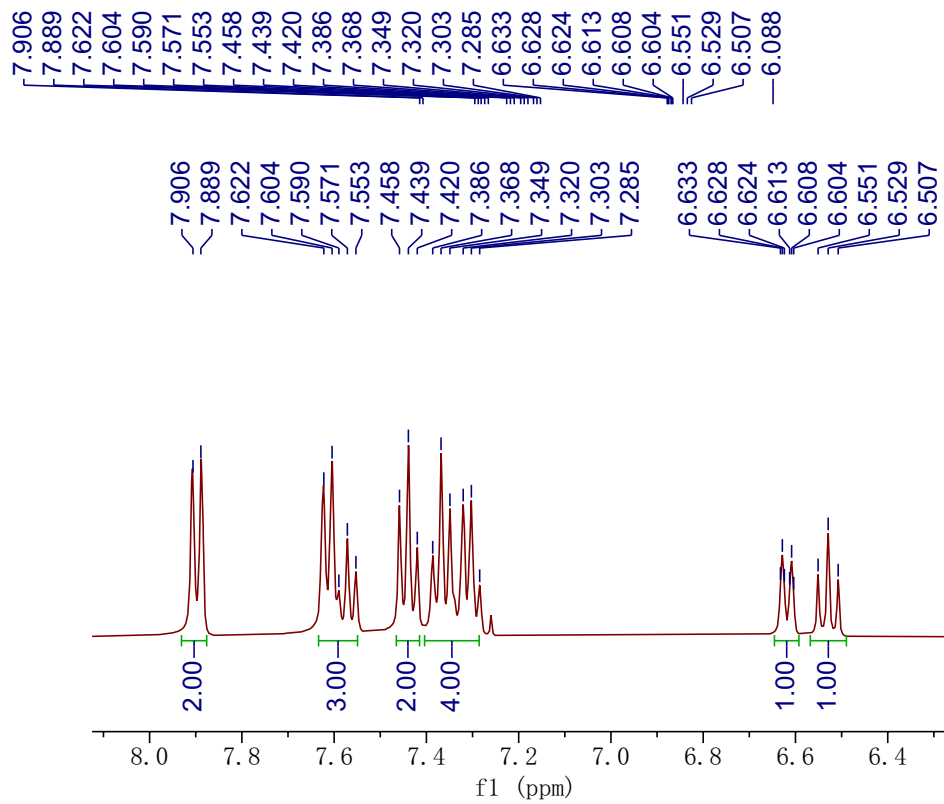

4.494  
4.489  
4.449  
4.444

3.426  
3.382

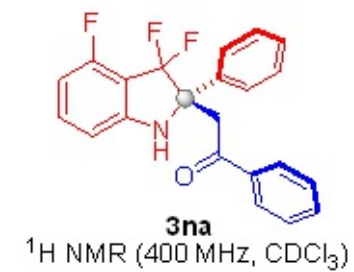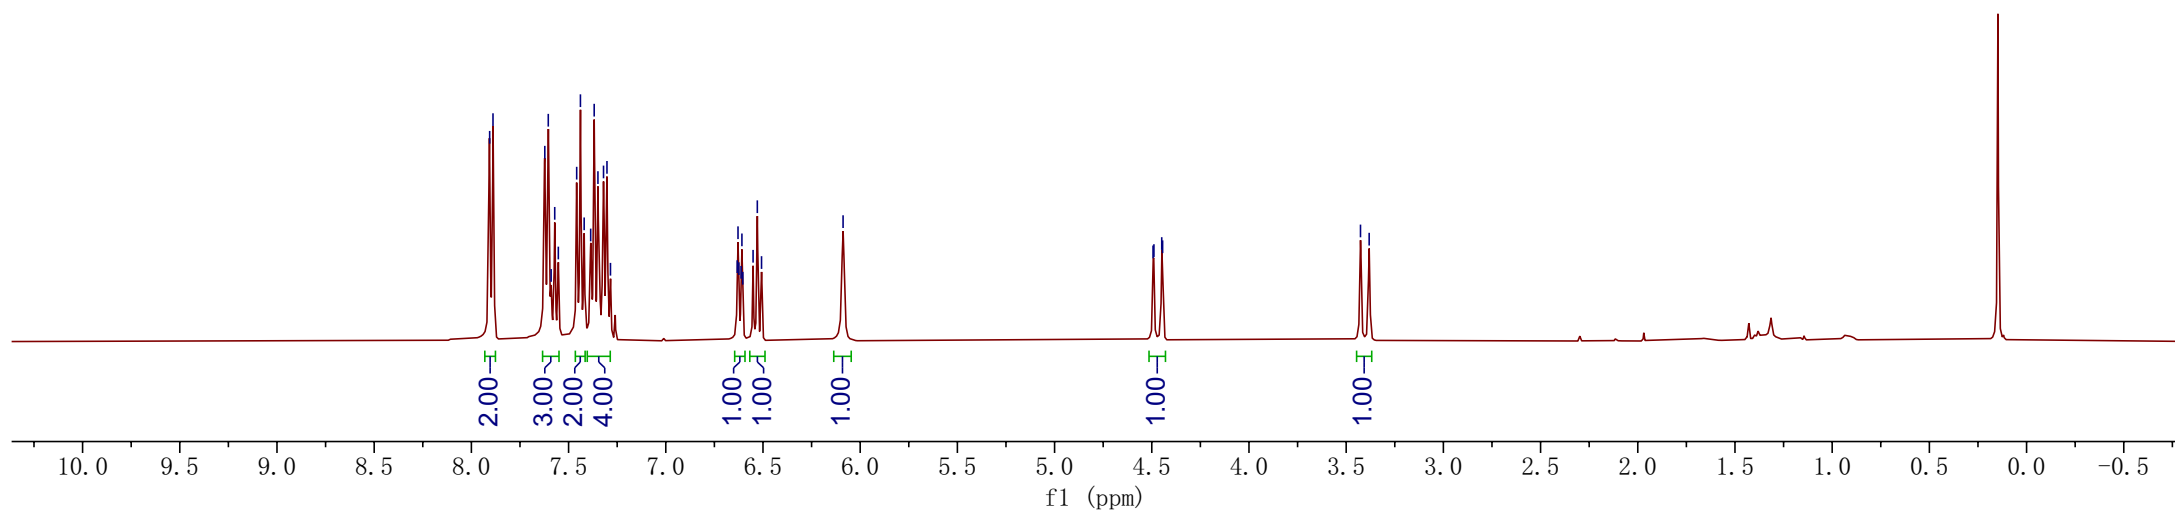

198.09  
198.07

161.20  
158.68  
151.96  
151.90  
151.84  
151.78  
136.79  
136.73  
136.58  
135.00  
134.91  
133.76  
128.65  
128.36  
128.28  
127.94  
127.87  
126.39  
125.86  
123.36  
107.11  
106.93  
106.86  
106.83  
106.68  
106.61  
106.43  
106.00  
105.81  
77.32  
77.00  
76.68  
72.48  
72.26  
72.21  
71.99  
41.97  
41.95  
41.87  
41.85

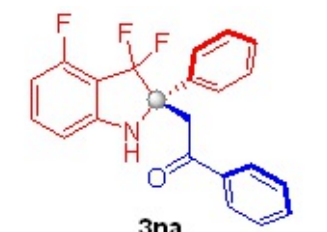

<sup>13</sup>C NMR (100 MHz, CDCl<sub>3</sub>)

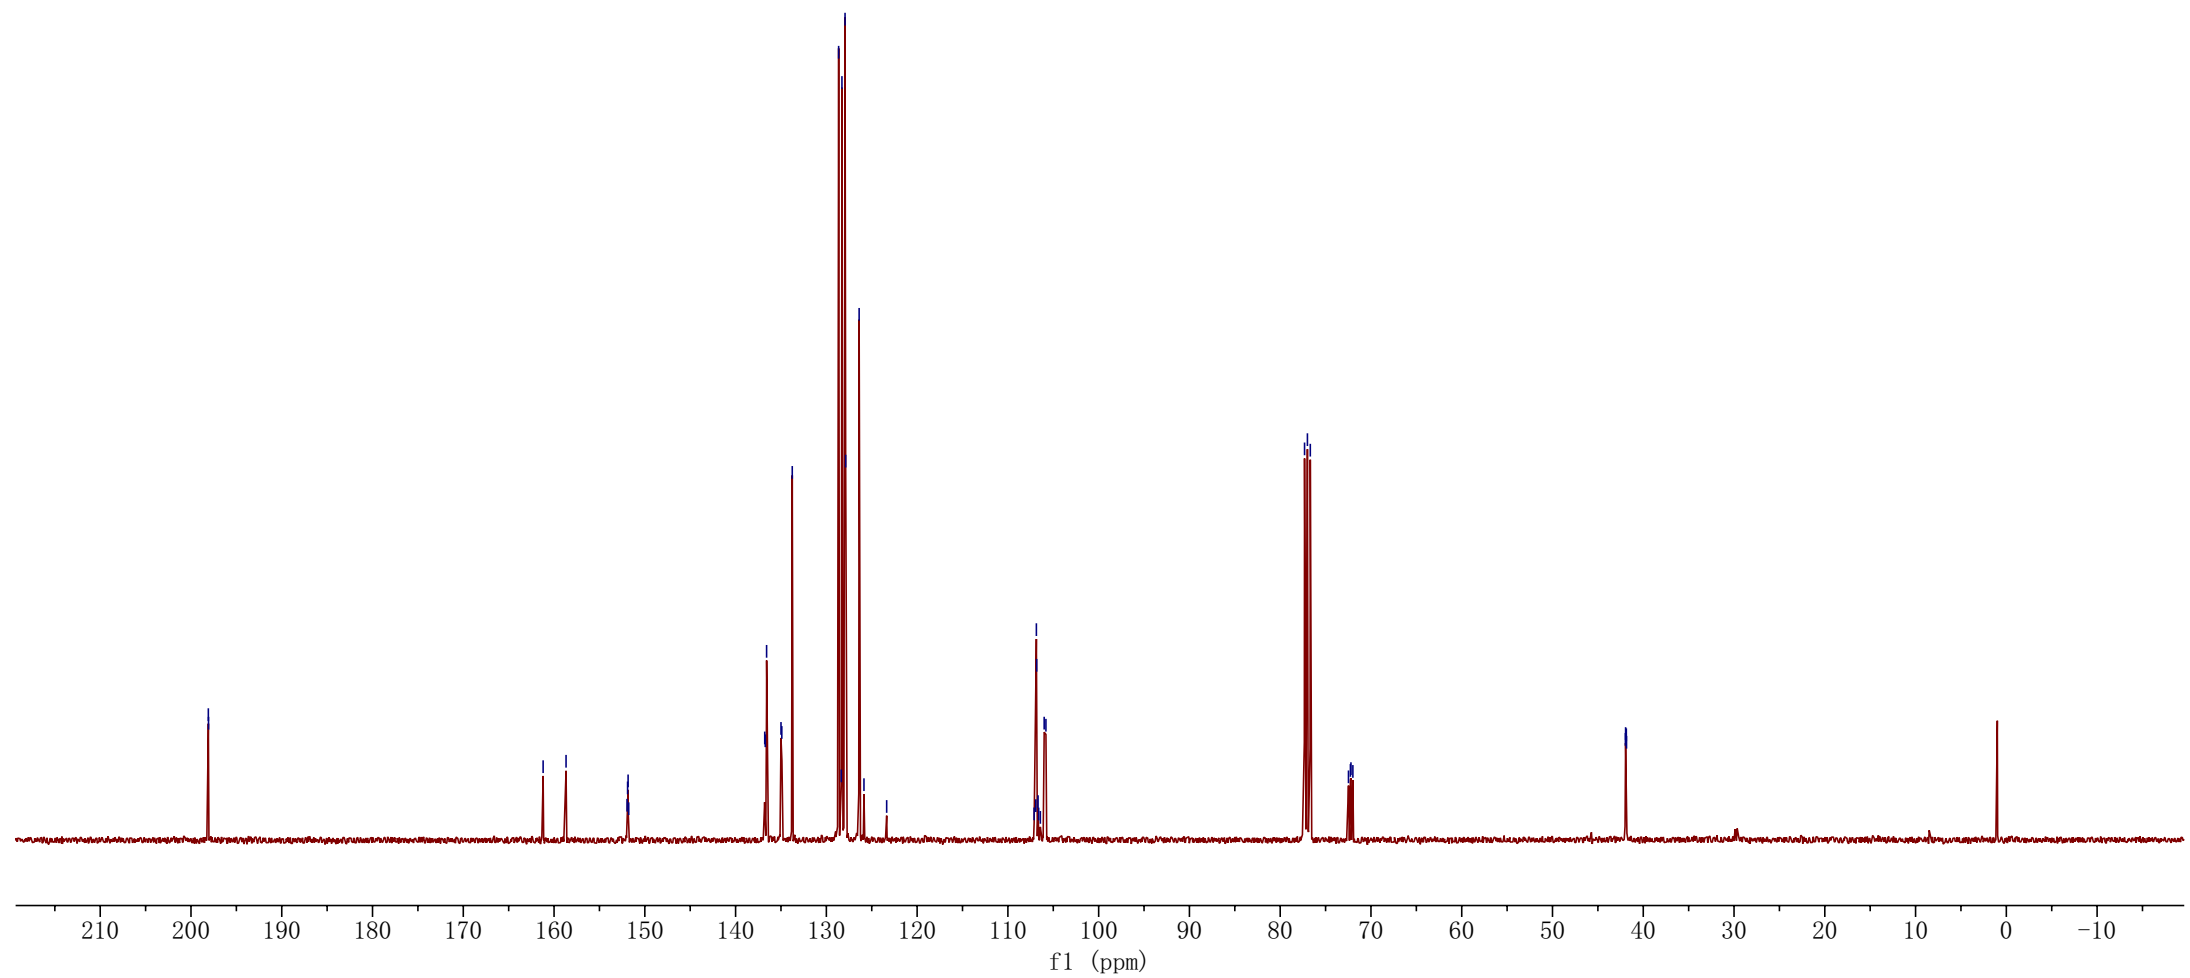



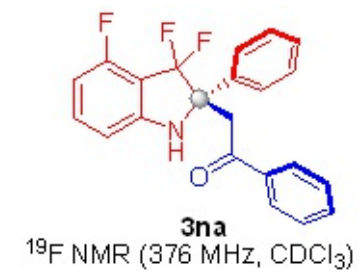

-85.02  
-85.04  
-85.69  
-85.70

-104.64  
-104.66  
-105.31  
-105.33

-117.54  
-117.56  
-117.56  
-117.57

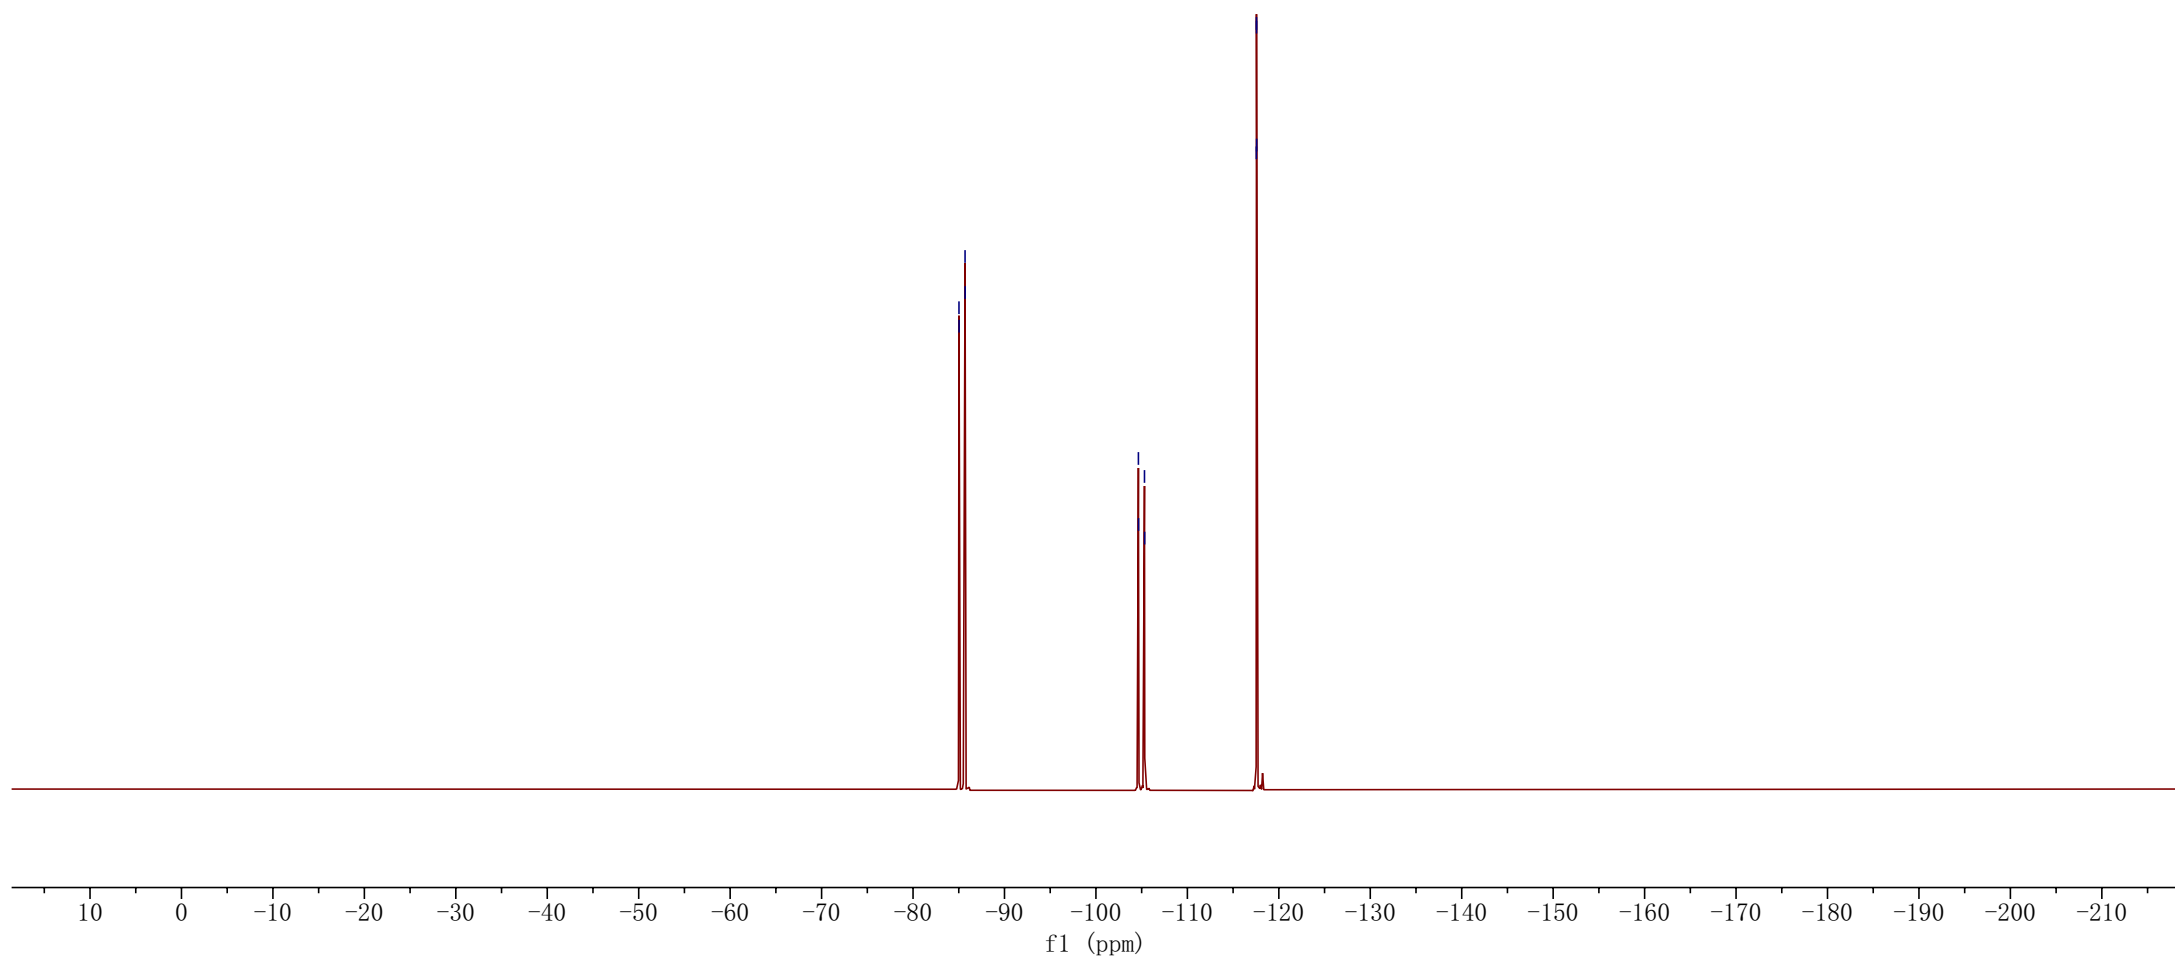

7.770  
7.753  
7.484  
7.465  
7.442  
7.423  
7.328  
7.309  
7.290  
7.250  
7.233  
7.213  
7.185  
7.167  
7.148  
7.136  
7.128  
7.108  
6.695  
6.676  
6.611  
6.591  
5.918

7.770  
7.753  
7.484  
7.465  
7.442  
7.423  
7.328  
7.309  
7.290  
7.250  
7.233  
7.213  
7.185  
7.167  
7.148  
7.136  
7.128  
7.108

4.353  
4.348  
4.308  
4.303

3.271  
3.227

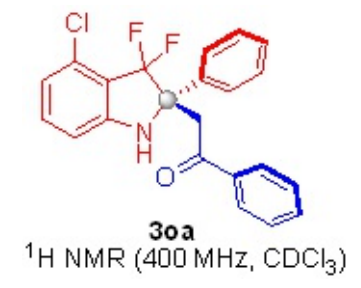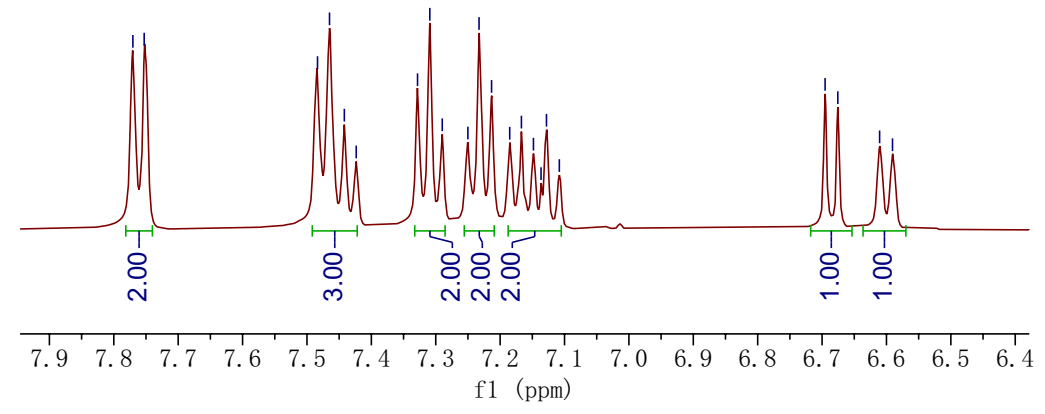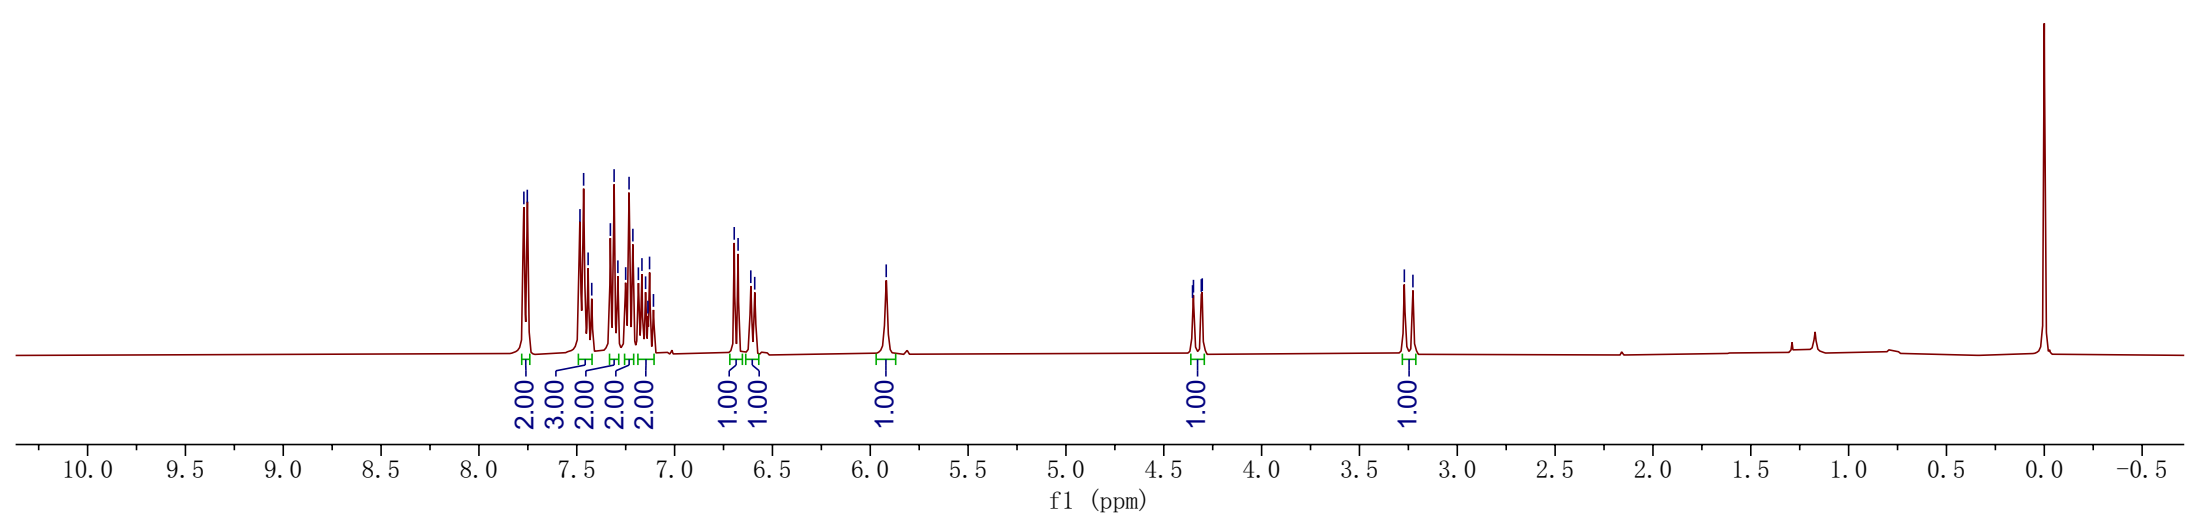

198.15  
198.13  
151.45  
151.40  
151.38  
151.33  
136.80  
136.74  
136.59  
134.01  
133.77  
131.75  
128.70  
128.65  
128.28  
127.95  
127.87  
126.39  
126.19  
123.68  
119.97  
117.10  
116.86  
116.62  
109.47

77.32  
77.00  
76.68  
72.13  
71.92  
71.86  
71.65

42.03  
42.01  
41.93  
41.91

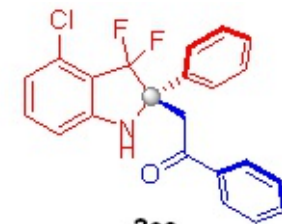

<sup>13</sup>C NMR (100 MHz, CDCl<sub>3</sub>)

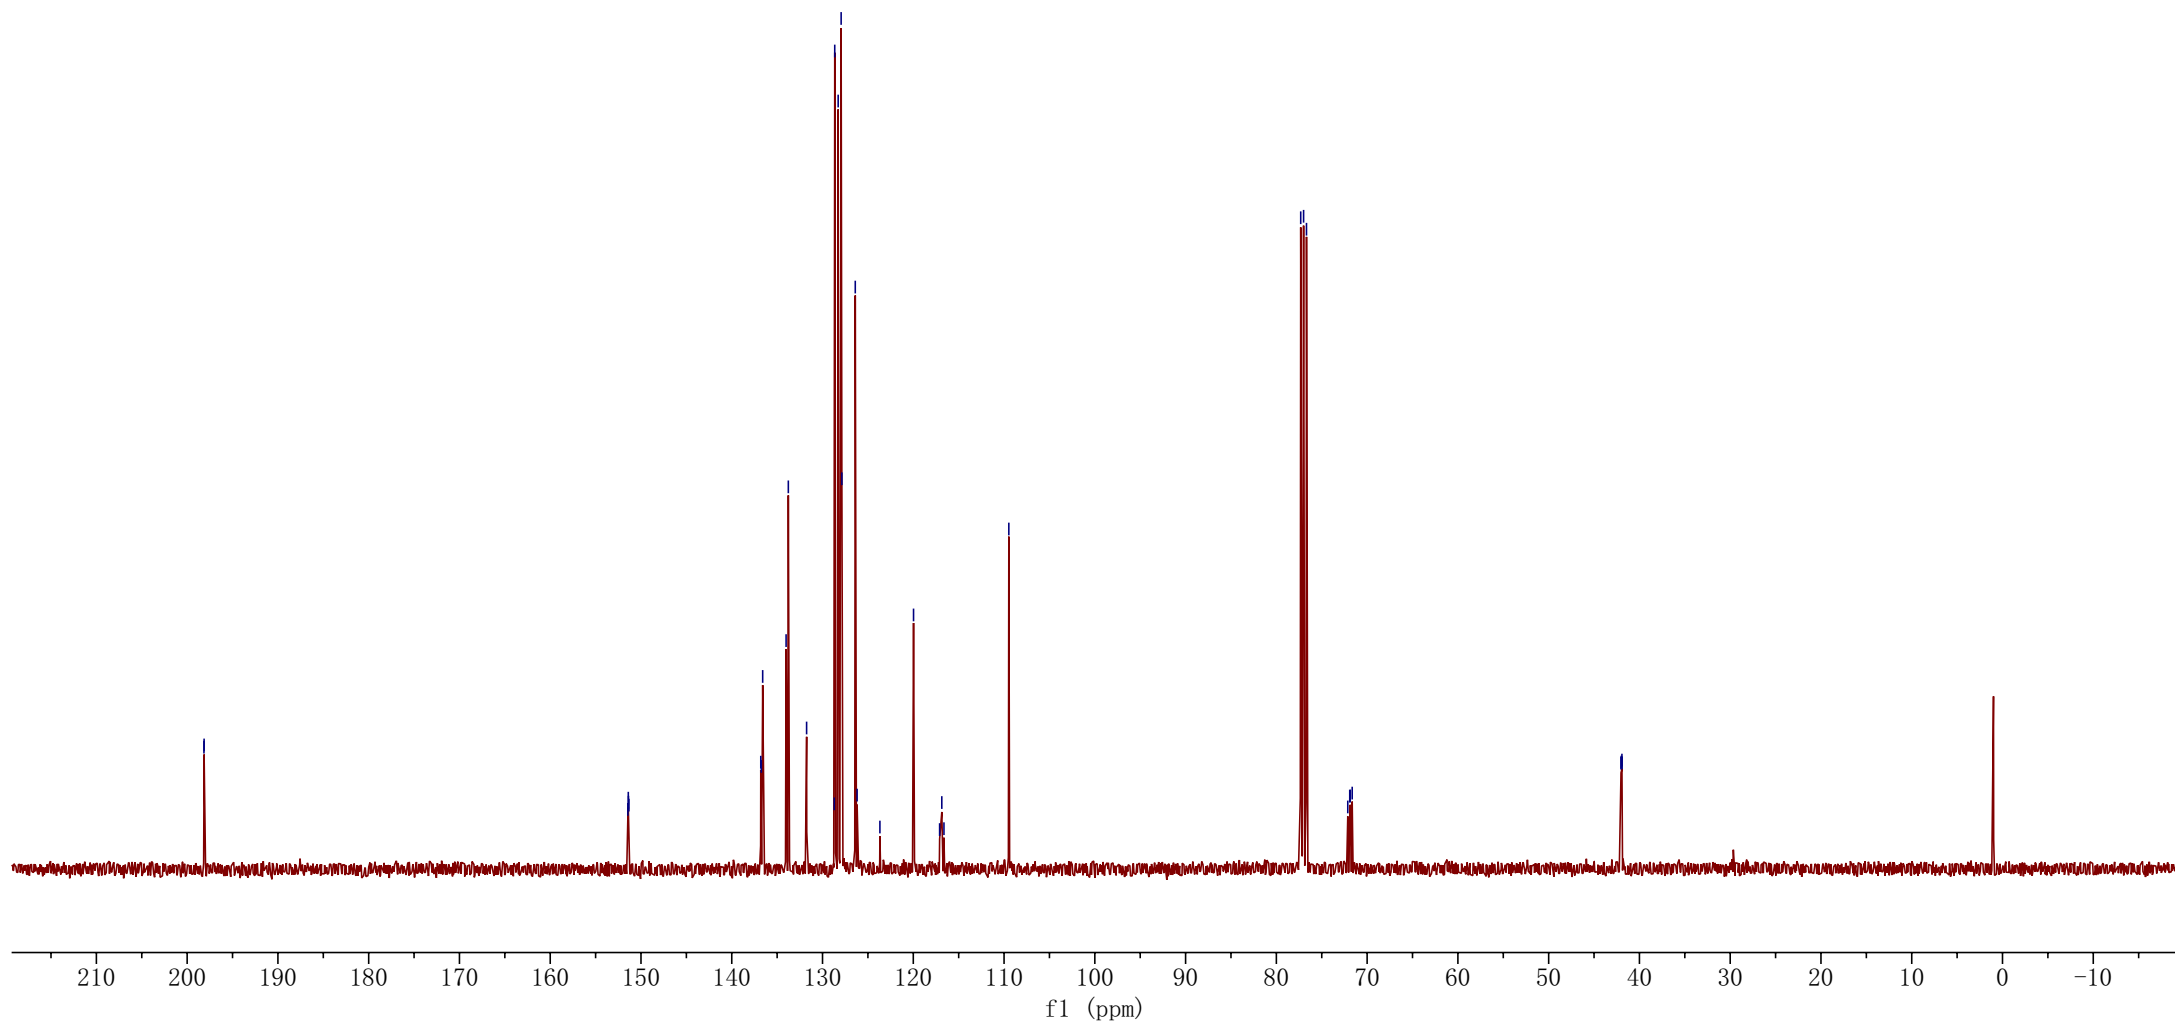

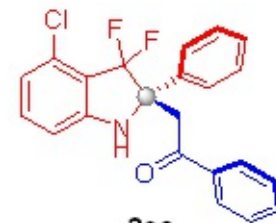

**30a**  
<sup>19</sup>F NMR (376 MHz, CDCl<sub>3</sub>)

-87.08  
-87.75

-105.89  
-106.55

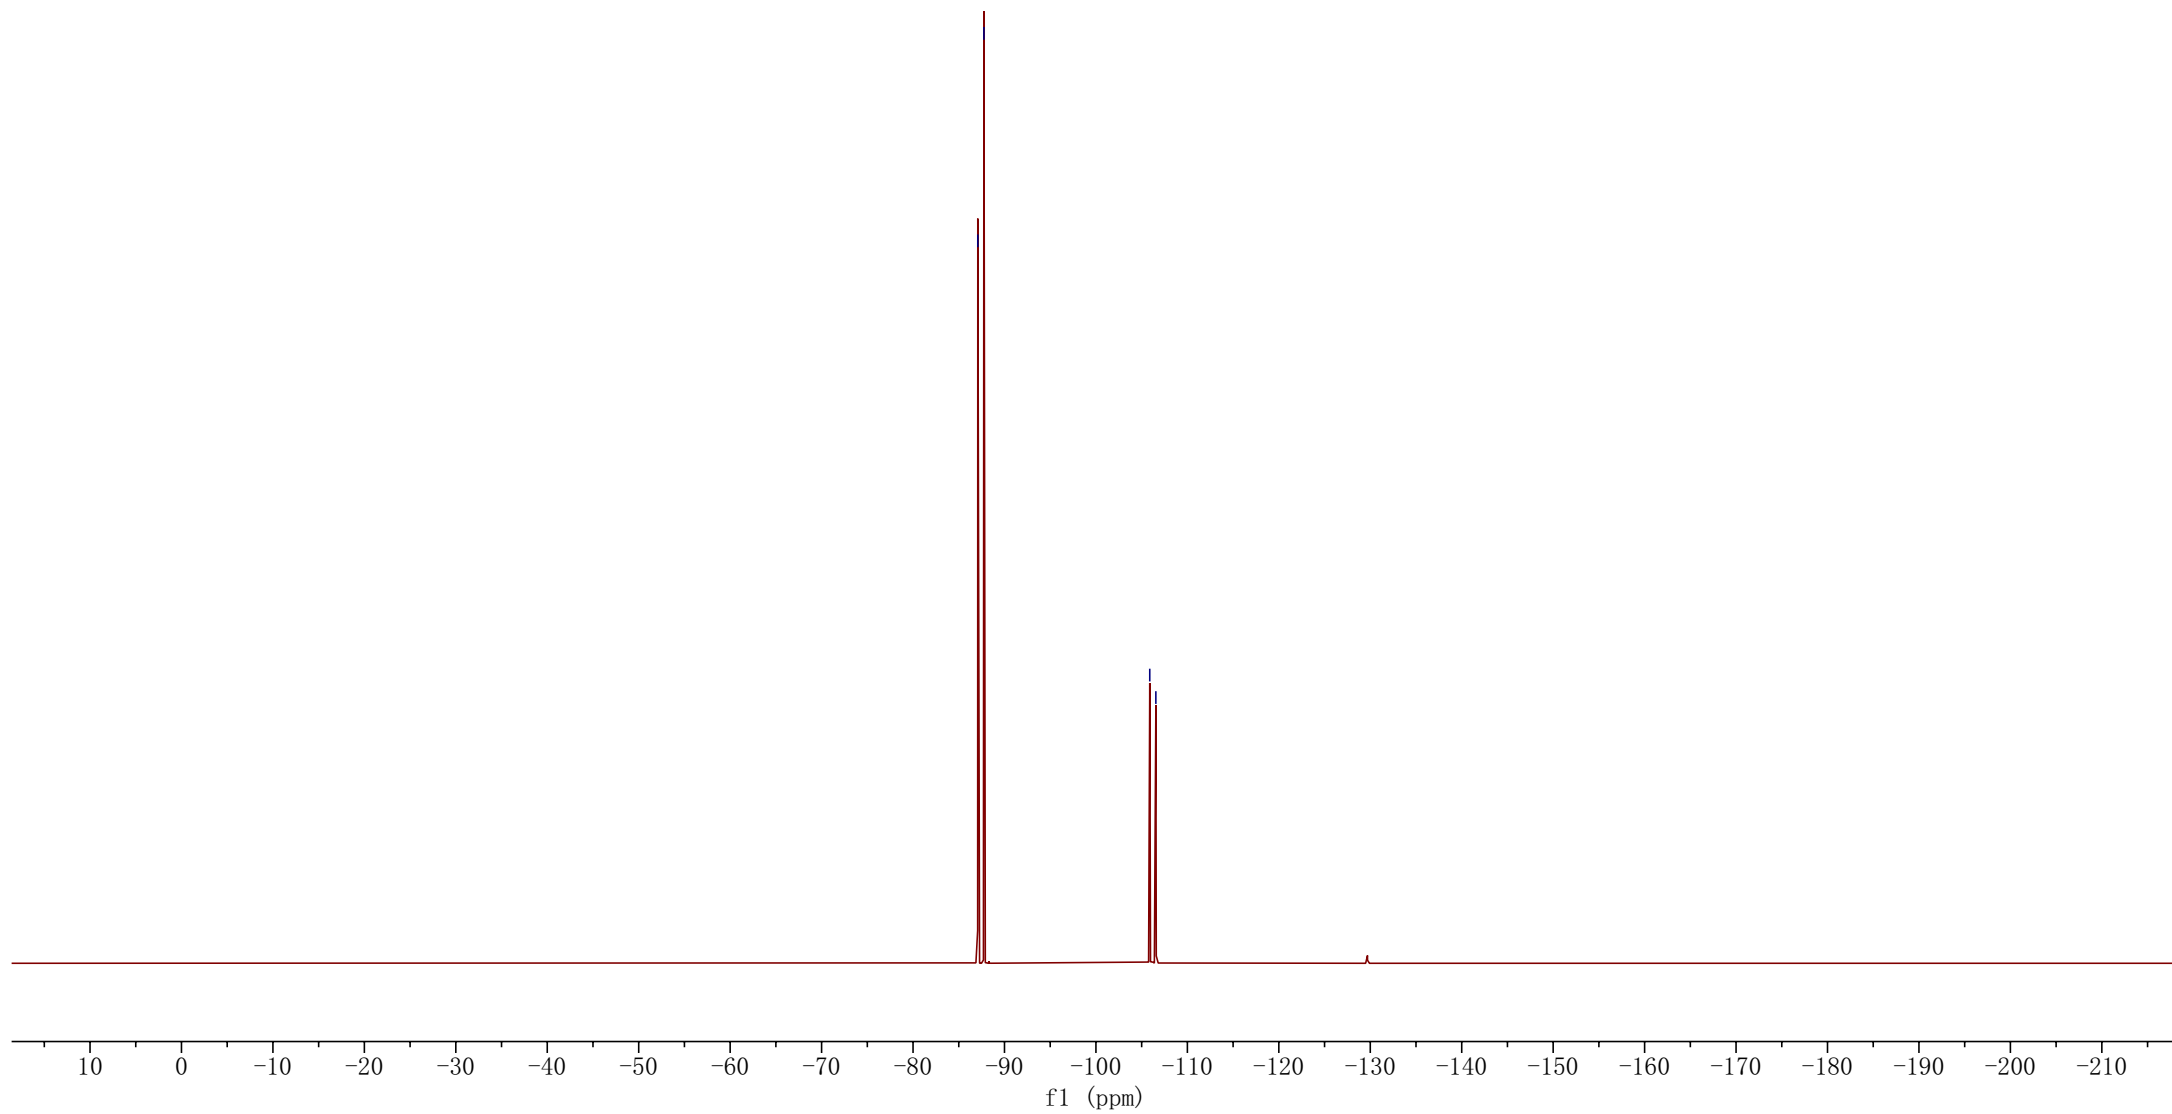

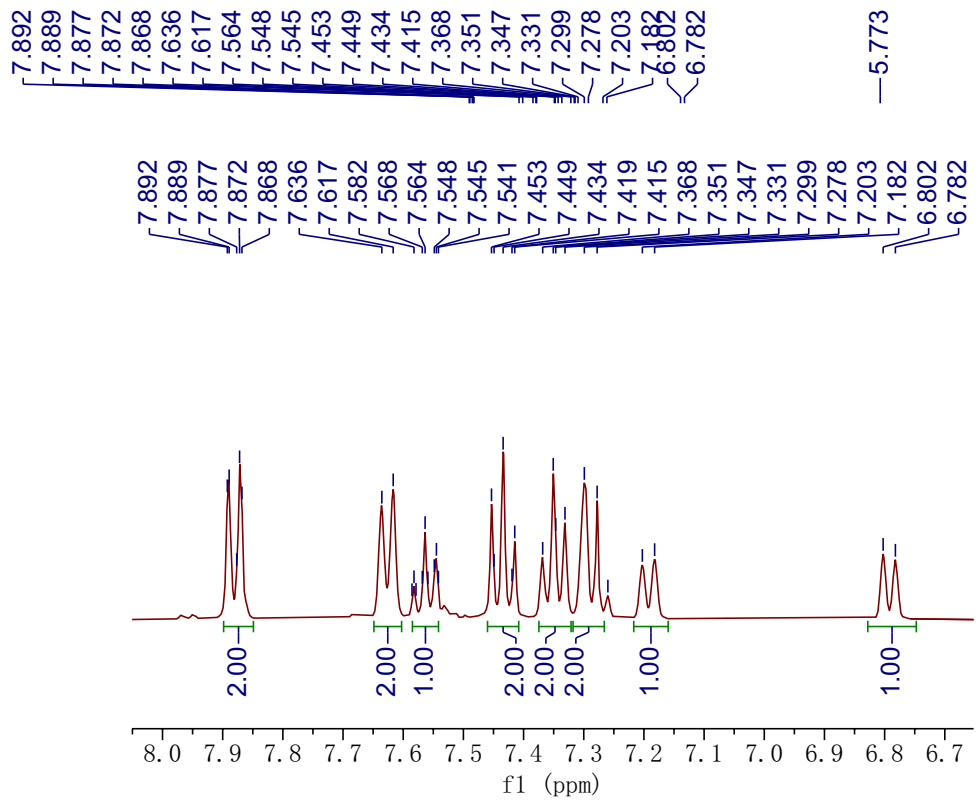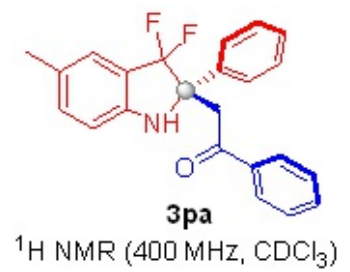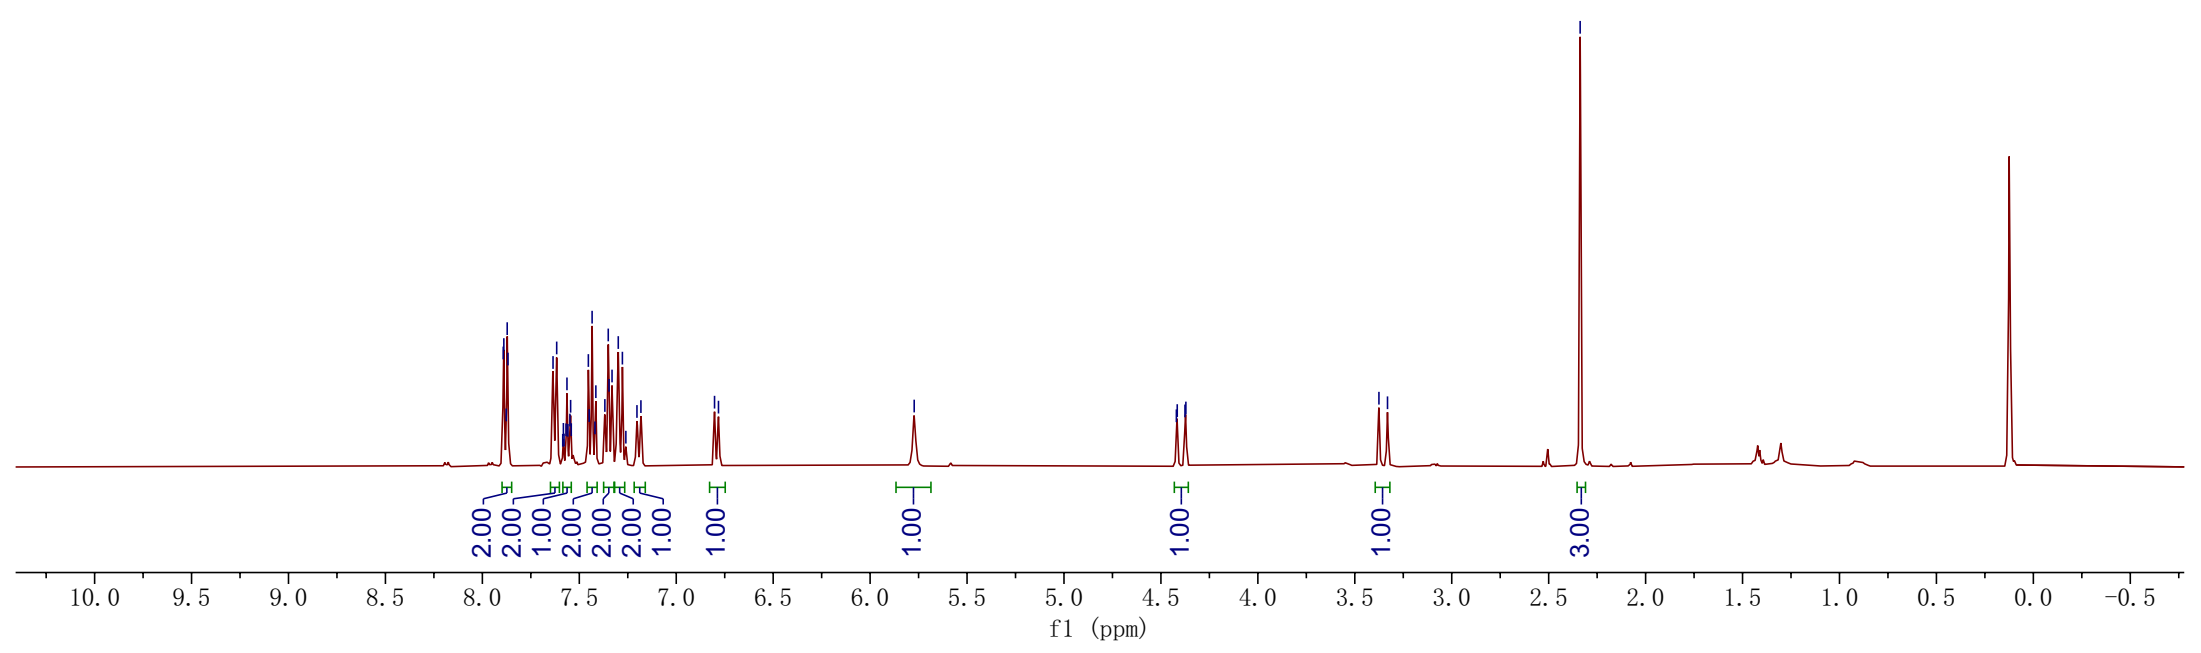

198.34  
198.32  
147.51  
147.45  
147.43  
147.37  
137.60  
137.55  
136.88  
133.74  
133.59  
129.36  
128.90  
128.79  
128.68  
128.60  
128.17  
127.95  
127.62  
126.87  
126.54  
124.38  
124.34  
120.47  
120.22  
119.97  
111.21

77.32  
77.00  
76.68  
72.27  
72.05  
71.99  
71.78

42.08  
42.05  
41.98  
41.96

20.67

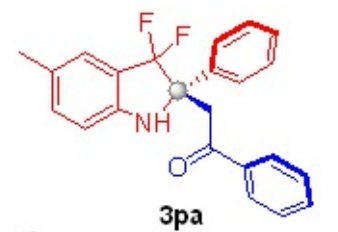

<sup>13</sup>C NMR (100 MHz, CDCl<sub>3</sub>)

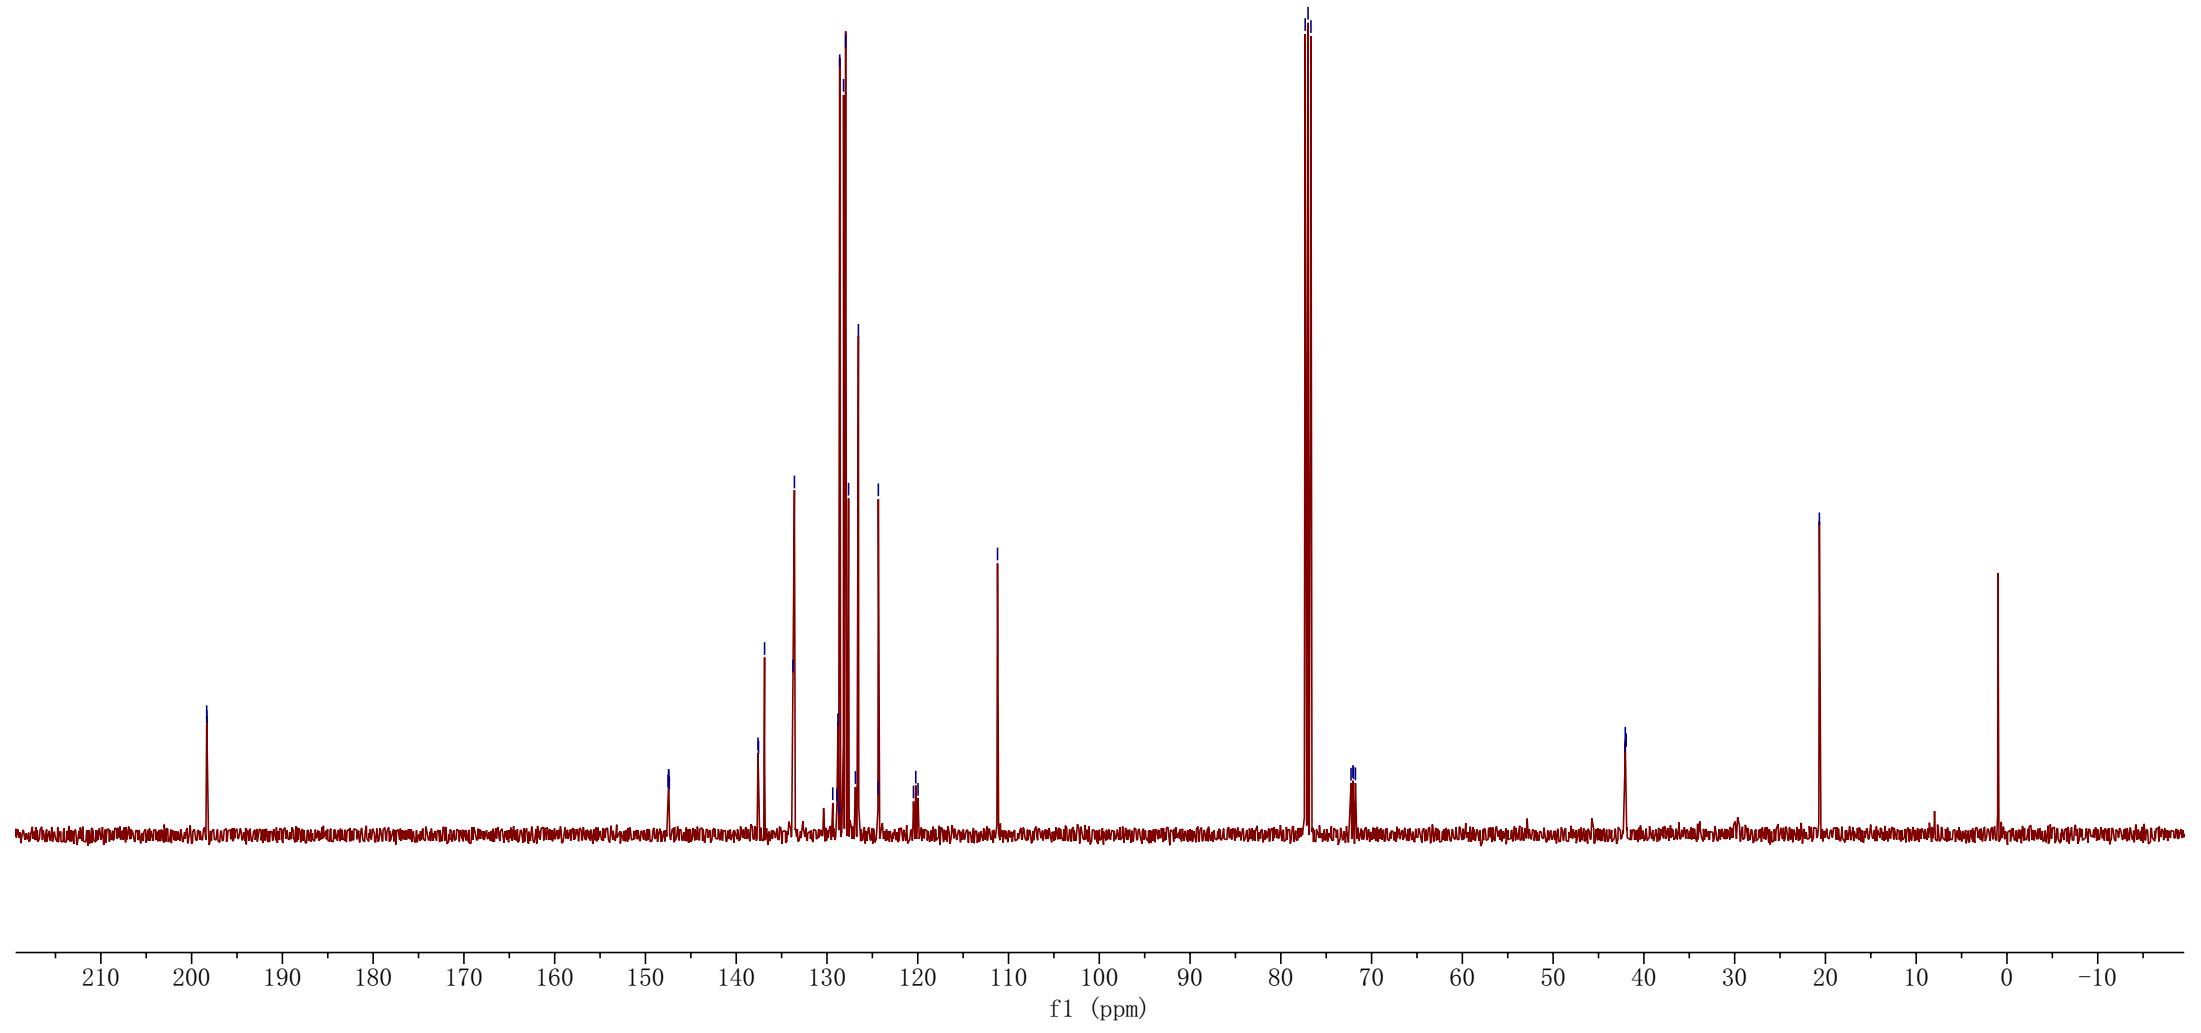

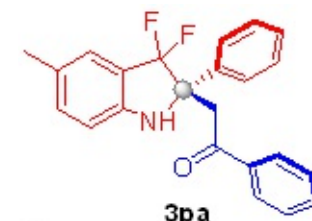

<sup>19</sup>F NMR (376 MHz, CDCl<sub>3</sub>)

-85.41  
-86.07

-107.08  
-107.74

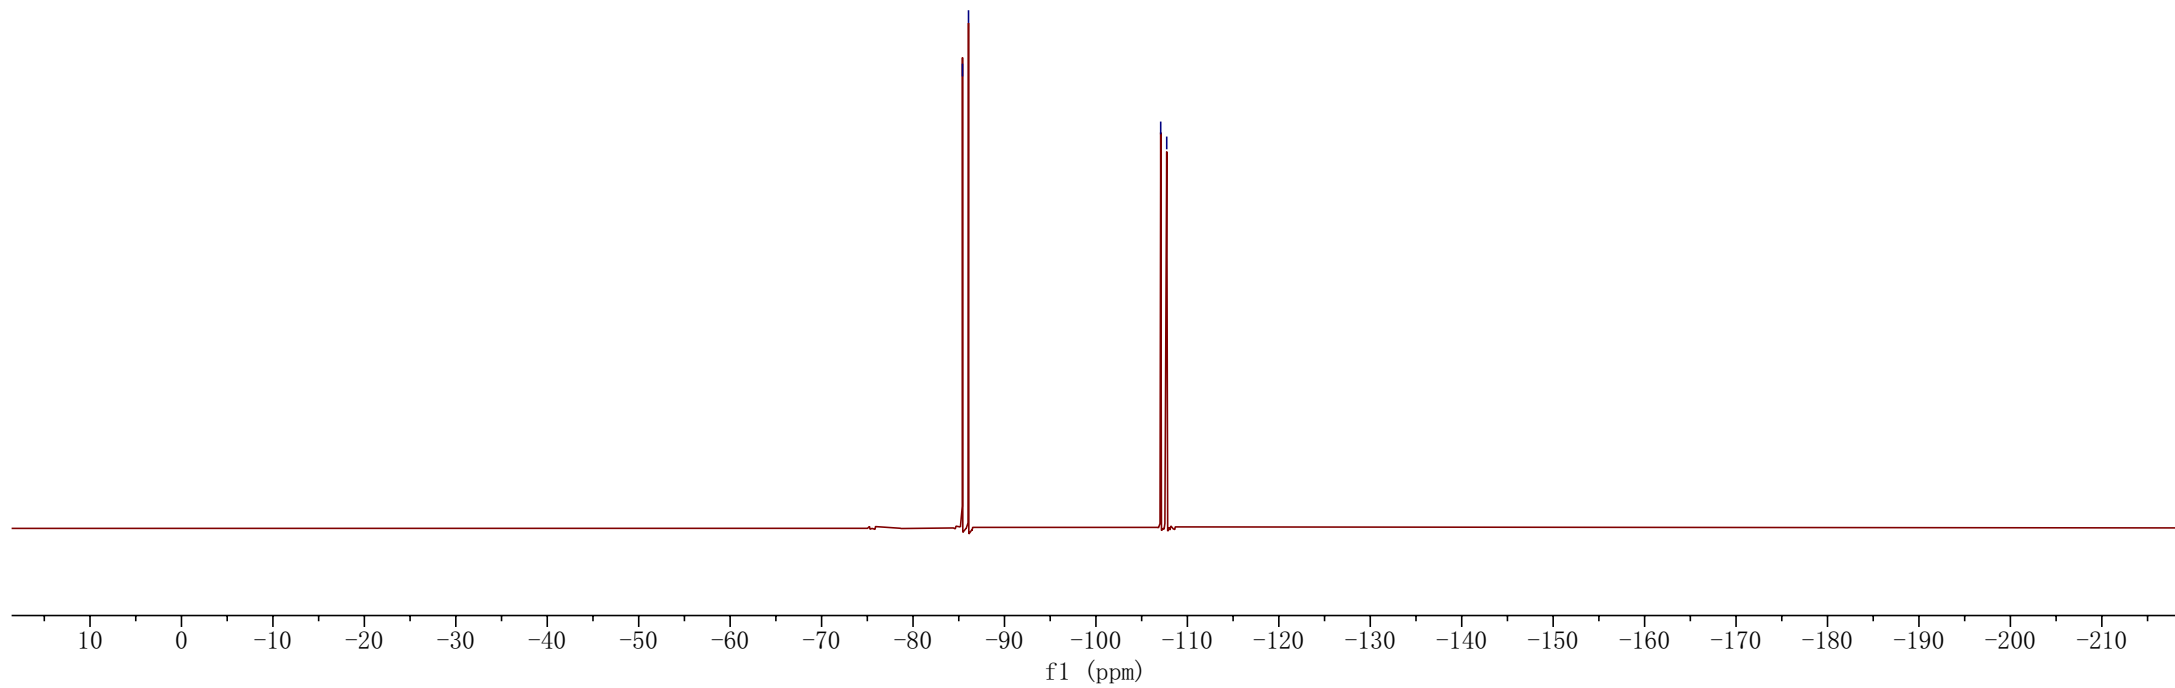

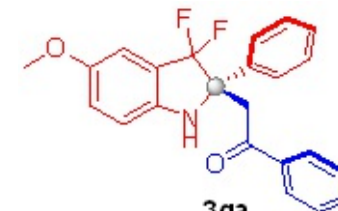

<sup>1</sup>H NMR (400 MHz, CDCl<sub>3</sub>)

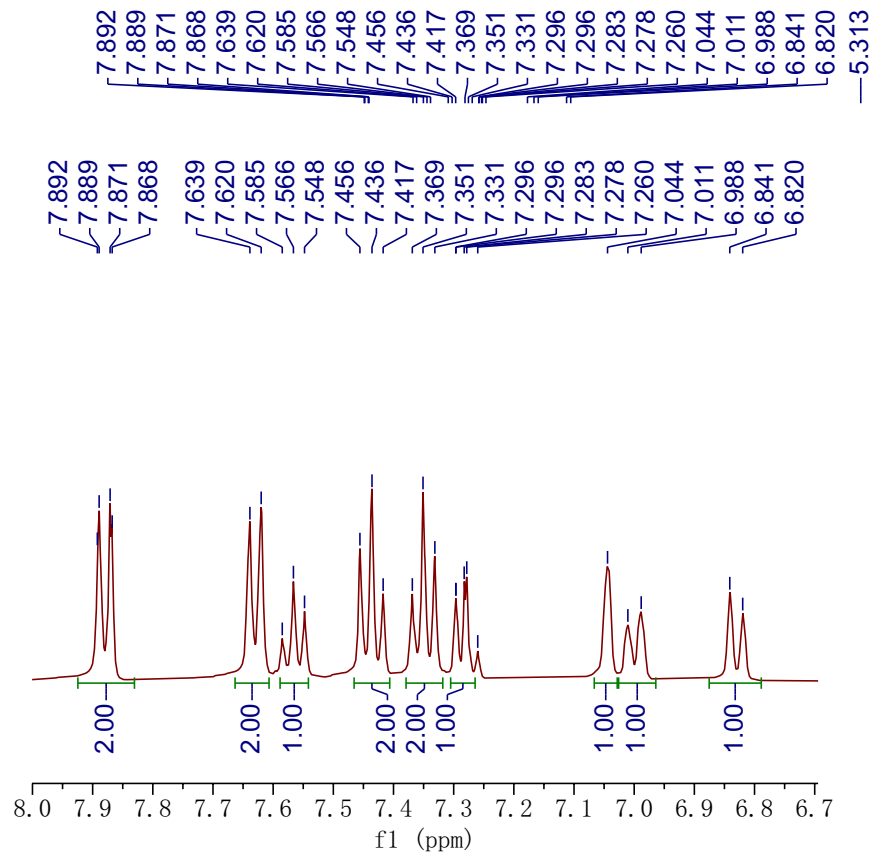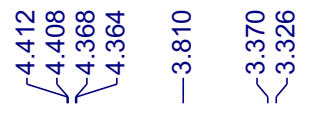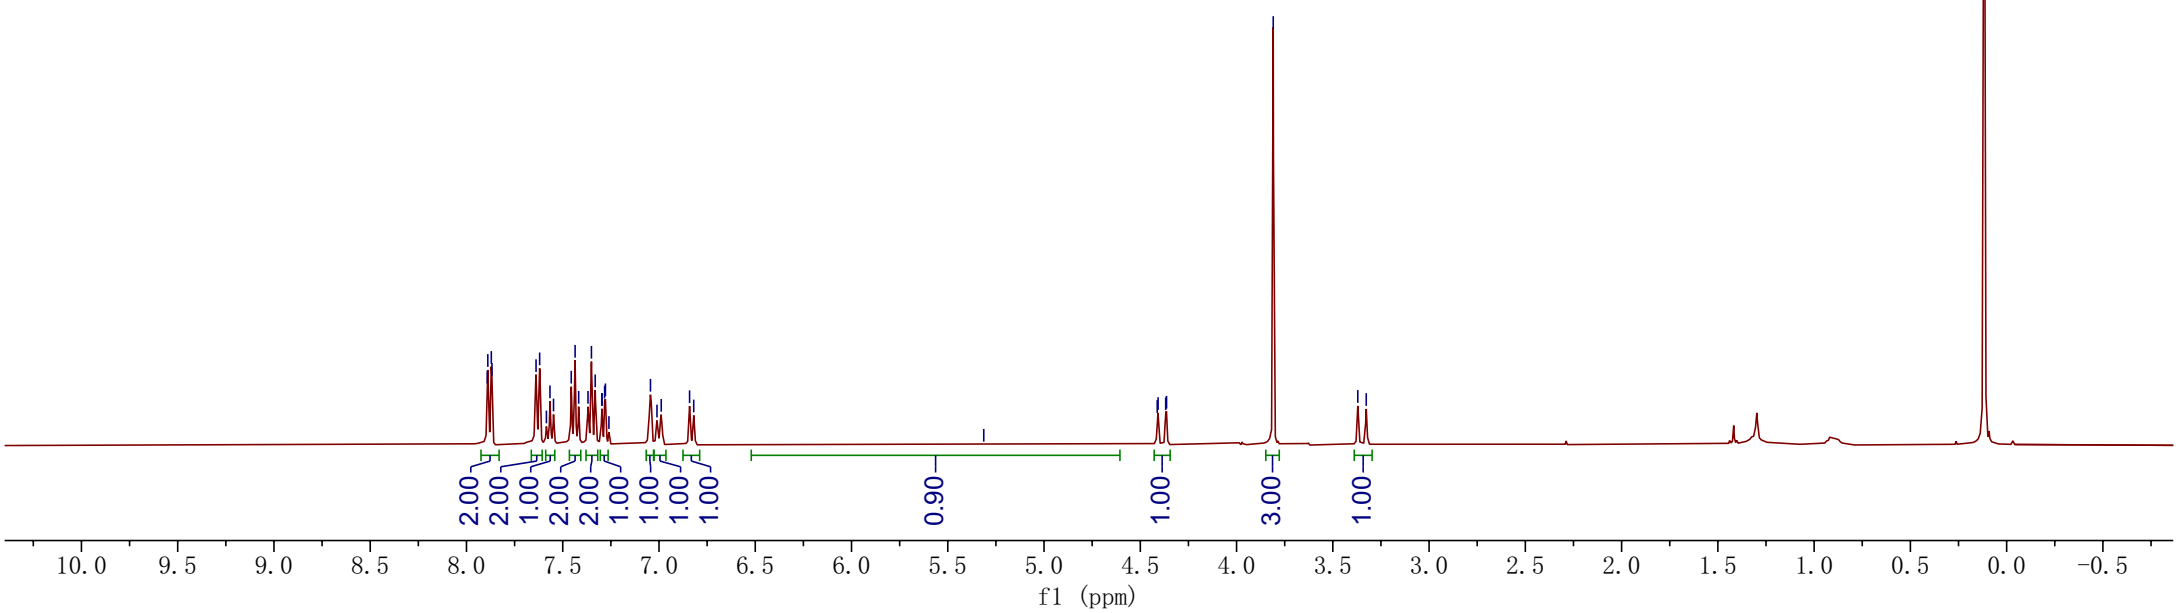



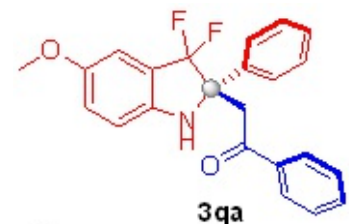

<sup>13</sup>C NMR (100 MHz, CDCl<sub>3</sub>)

198.37  
198.35  
153.60  
143.74  
143.68  
143.65  
143.59  
137.55  
137.50  
136.93  
133.60  
129.41  
128.61  
128.19  
127.97  
127.67  
126.91  
126.59  
124.42  
120.95  
120.70  
120.69  
120.52  
120.45  
112.55  
108.41

77.32  
77.00  
76.68  
72.63  
72.42  
72.35  
72.15

56.01

42.02  
42.00  
41.93  
41.91

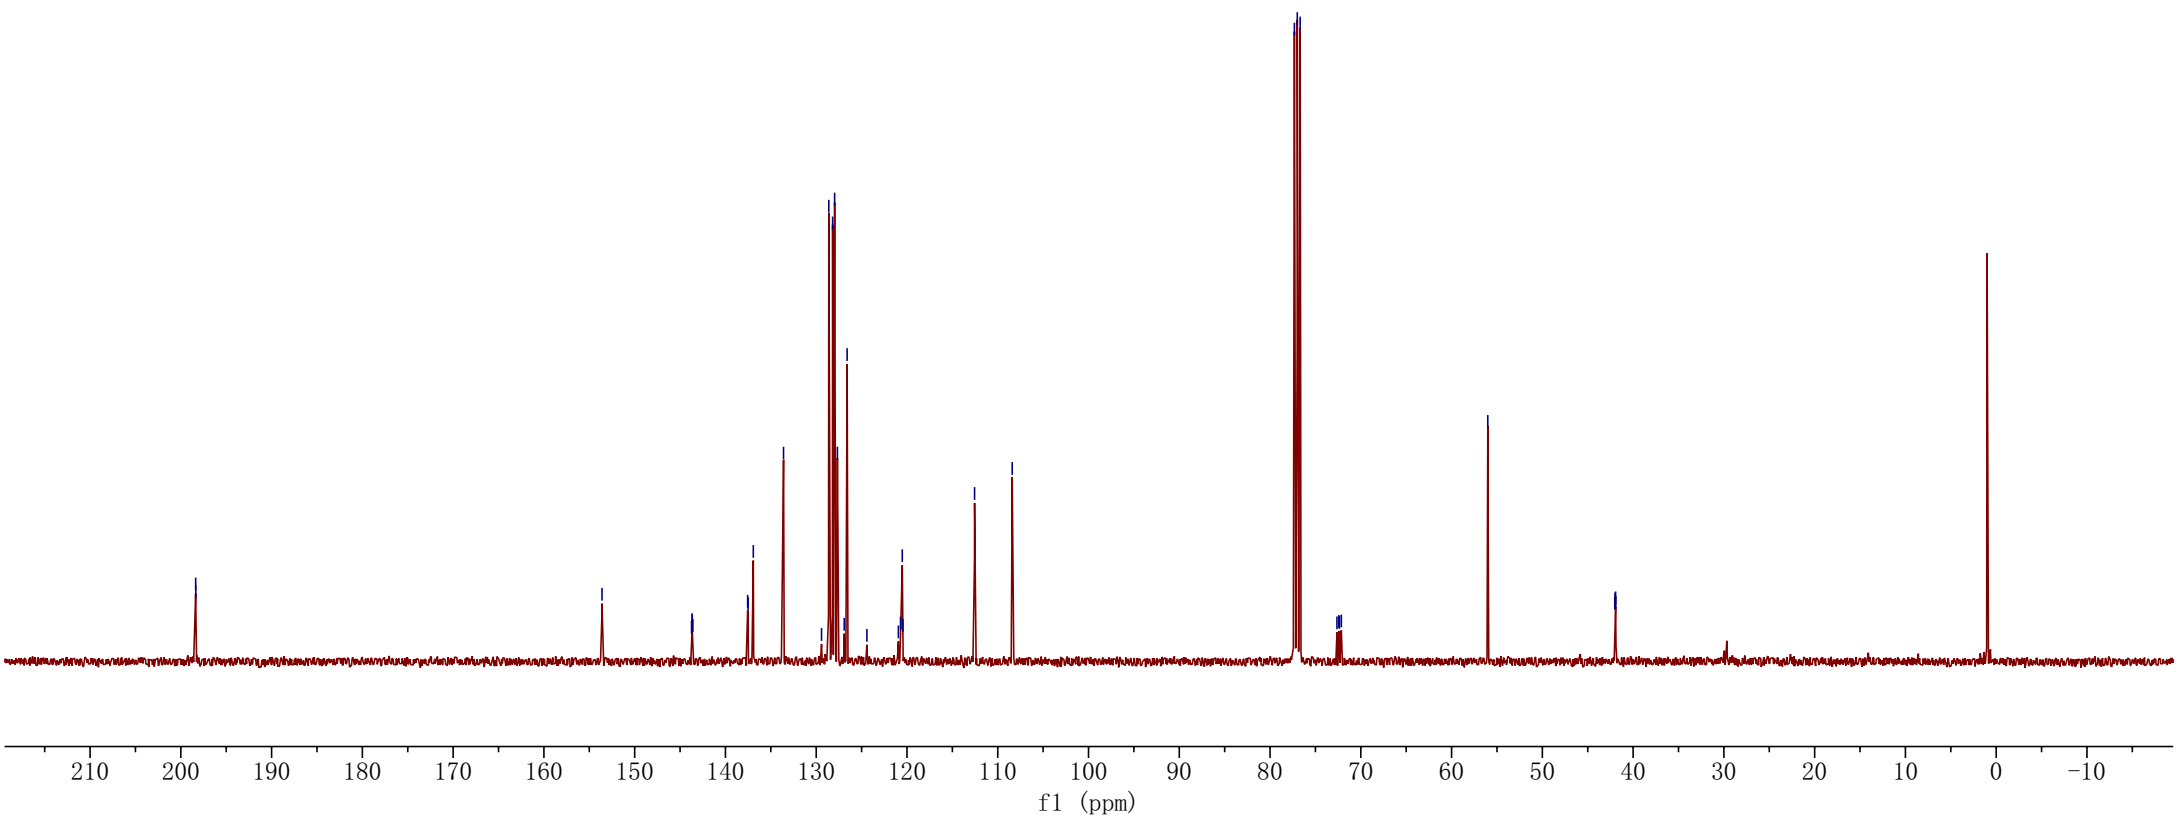

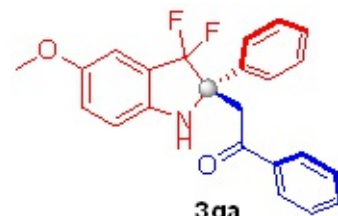

<sup>19</sup>F NMR (376 MHz, CDCl<sub>3</sub>)

--85.95  
--86.60

--107.28  
--107.94

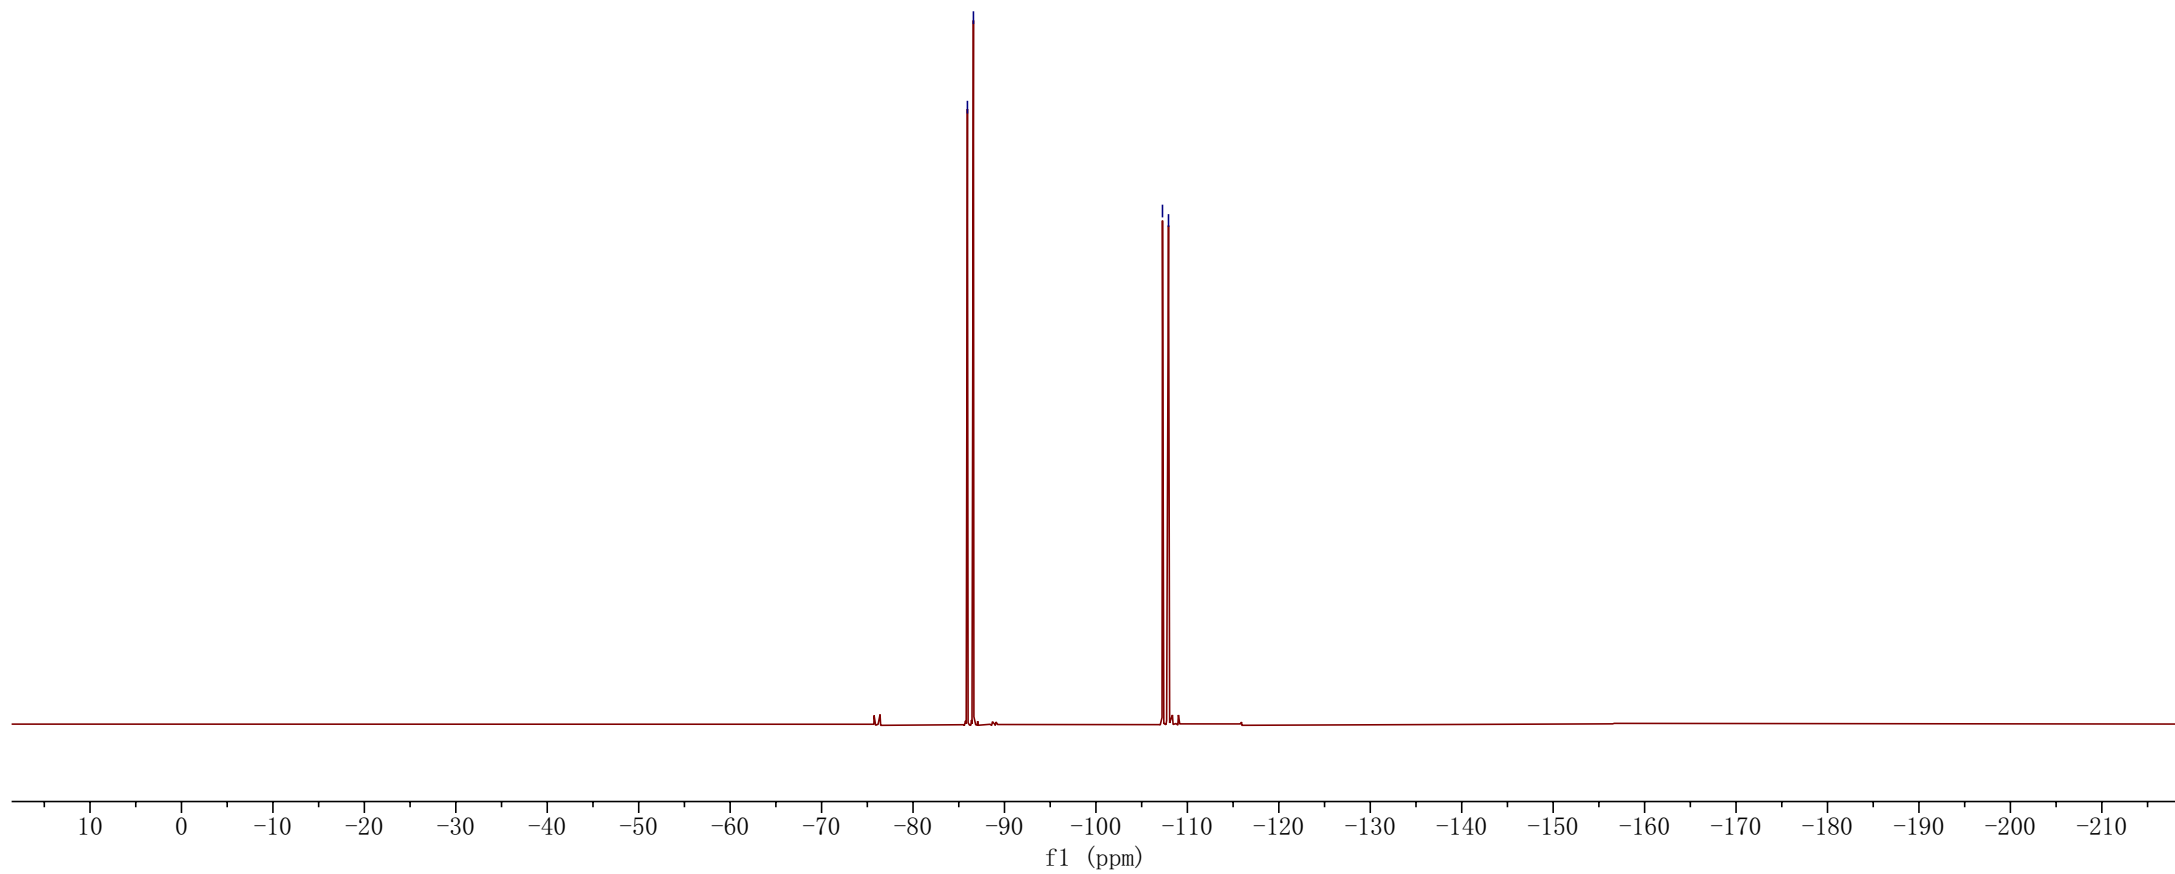

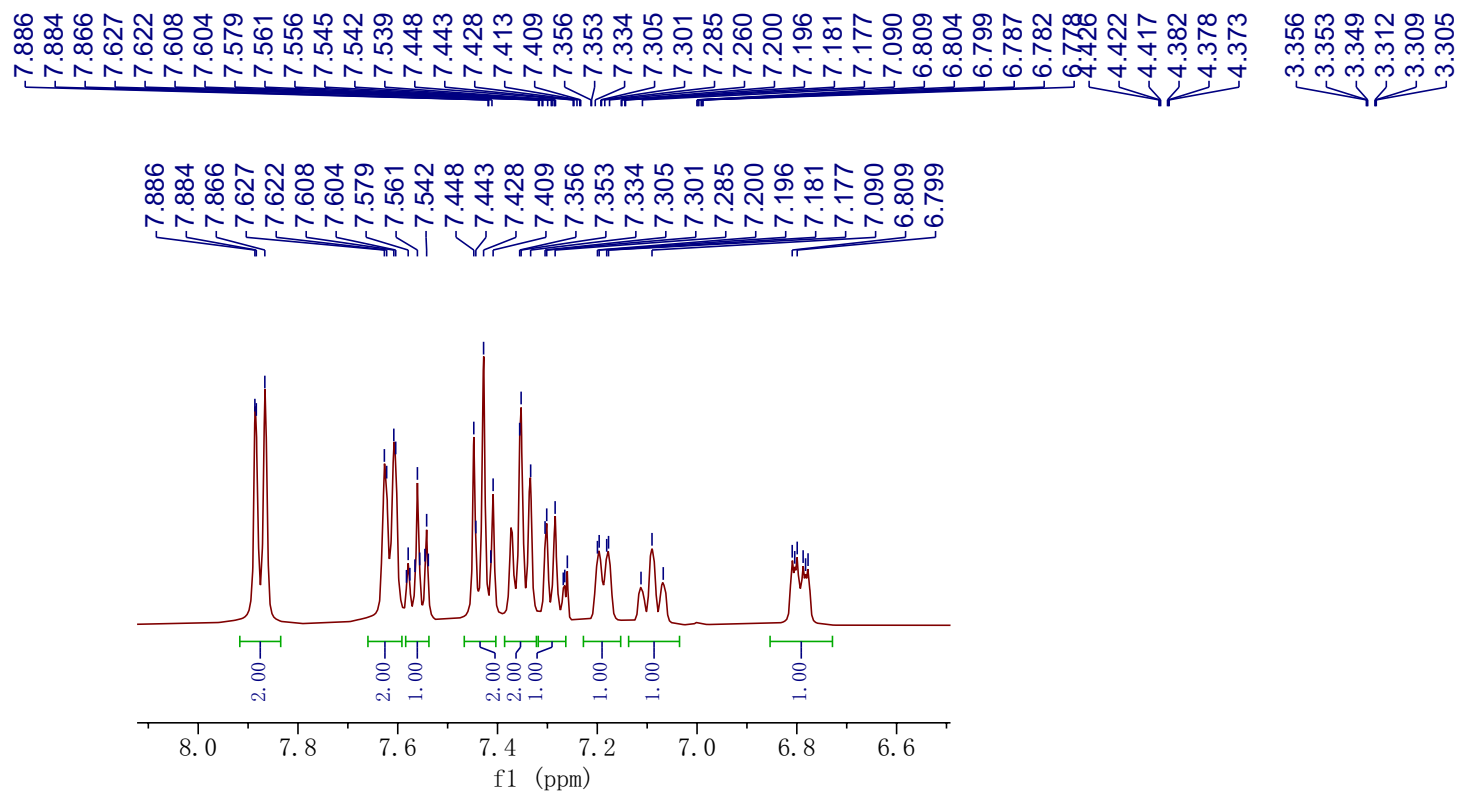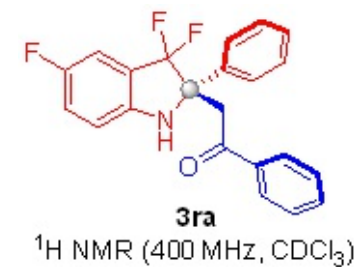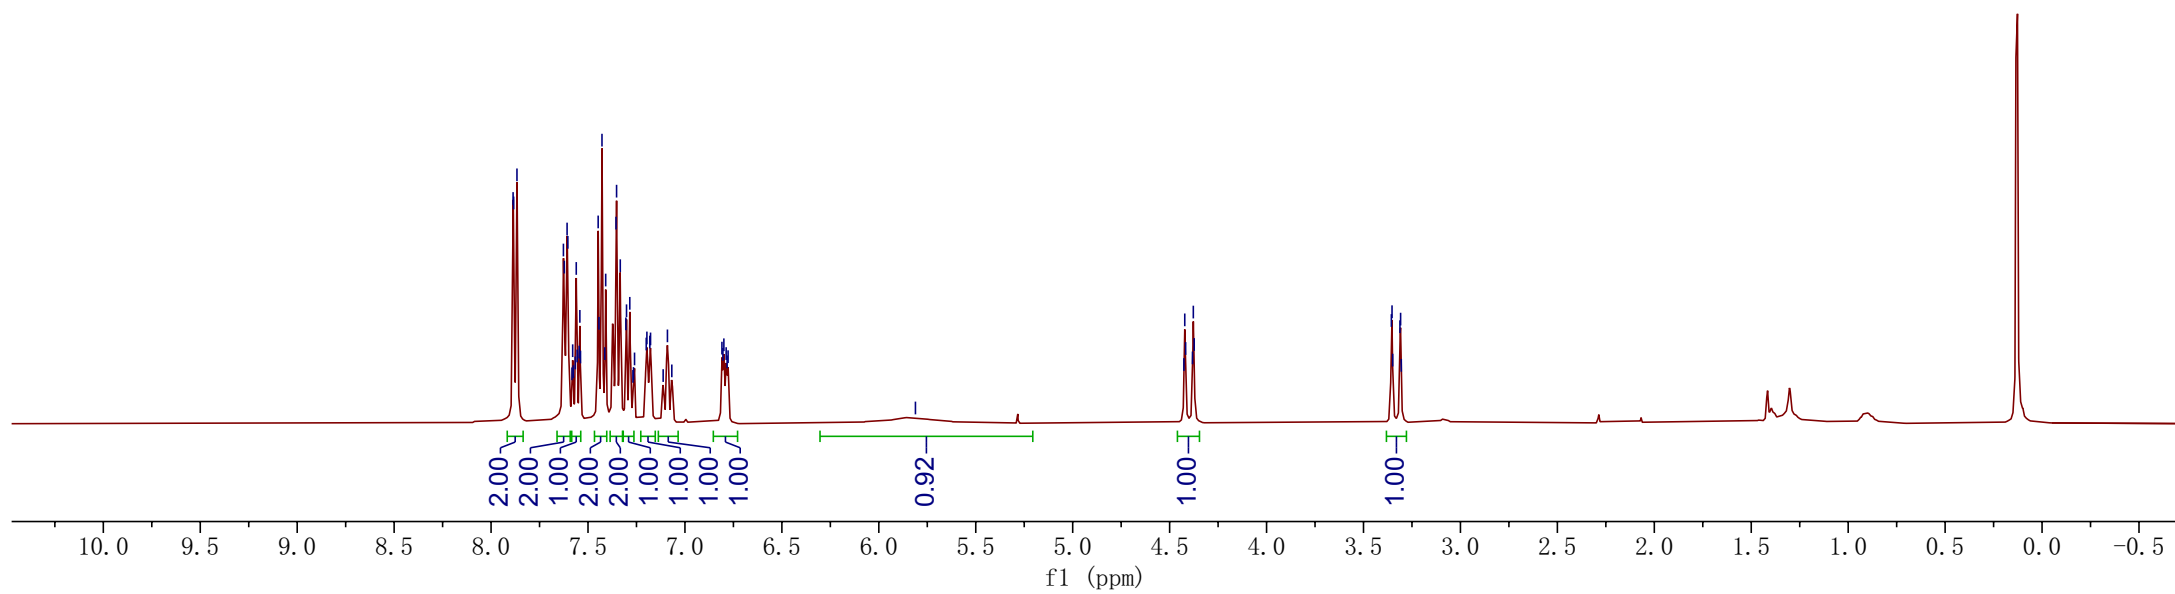

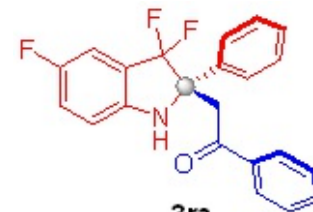

<sup>13</sup>C NMR (100 MHz, CDCl<sub>3</sub>)

198.20  
198.18

157.71  
155.34

145.82  
145.75  
145.69

137.07  
137.02  
136.71

133.71

128.72  
128.63  
128.25

127.94  
127.80  
126.46

126.22  
123.73  
121.10

121.02  
120.85  
120.77

120.59  
120.51  
120.22

119.99  
112.23  
112.15

111.09  
110.85  
77.32

77.00  
76.68  
72.74

72.53  
72.47  
72.26

41.81  
41.79  
41.72

41.69

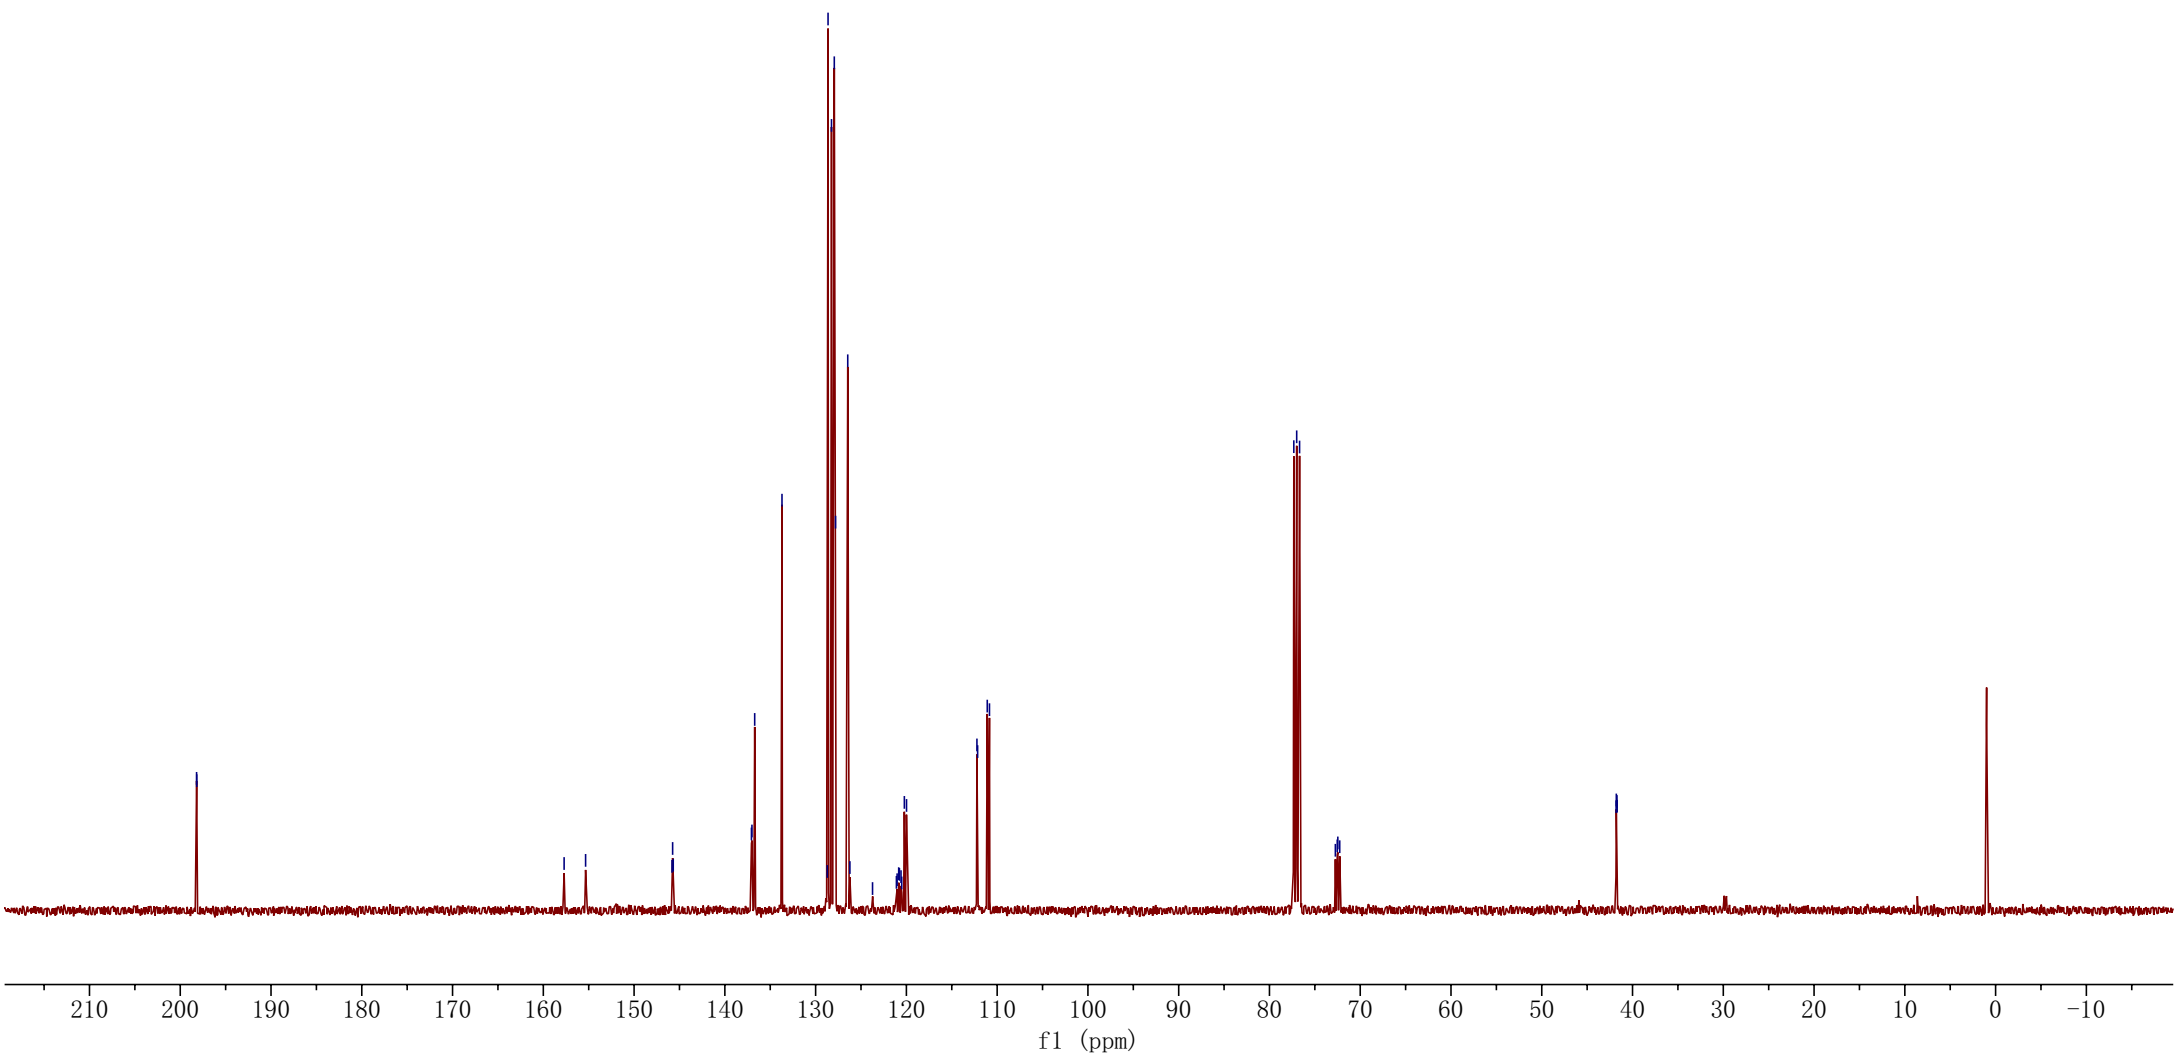

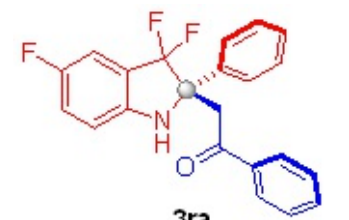

**3ra**  
<sup>19</sup>F NMR (376 MHz, CDCl<sub>3</sub>)

-85.73  
-85.75  
-86.39  
-86.41

-107.14  
-107.18  
-107.81  
-107.84

-124.29  
-124.30

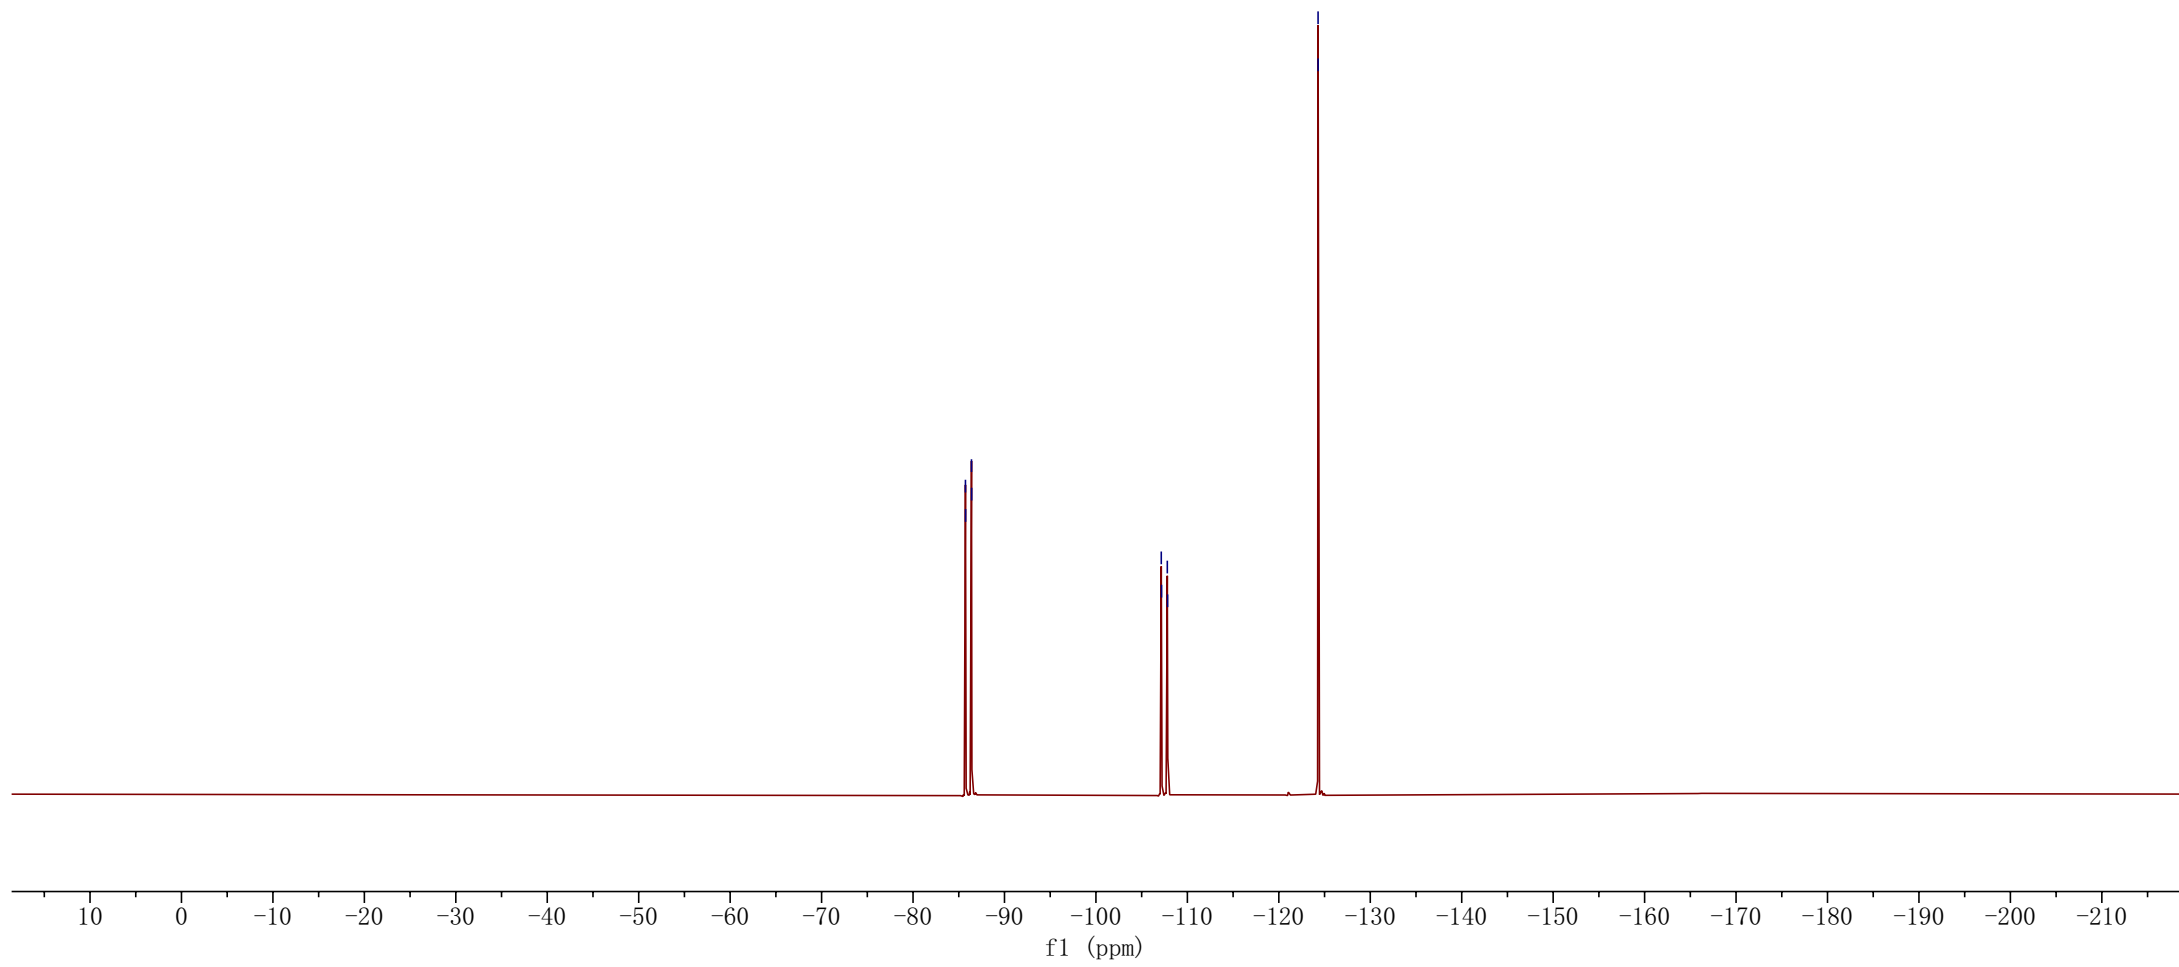

7.889  
7.869  
7.615  
7.596  
7.583  
7.565  
7.546  
7.451  
7.431  
7.412  
7.379  
7.360  
7.341  
7.324  
7.313  
7.309  
7.301  
7.294  
7.275  
7.260  
6.787  
6.765  
—5.978

7.889  
7.869  
7.615  
7.596  
7.583  
7.565  
7.546  
7.451  
7.431  
7.412  
7.379  
7.360  
7.341  
7.324  
7.313  
7.309  
7.301  
7.294  
7.275  
7.260  
6.787  
6.765

4.437  
4.393

3.361  
3.316

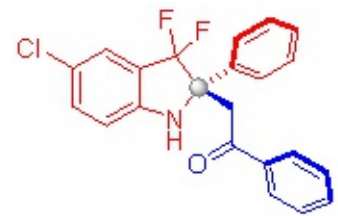

**3sa**  
<sup>1</sup>H NMR (400 MHz, CDCl<sub>3</sub>)

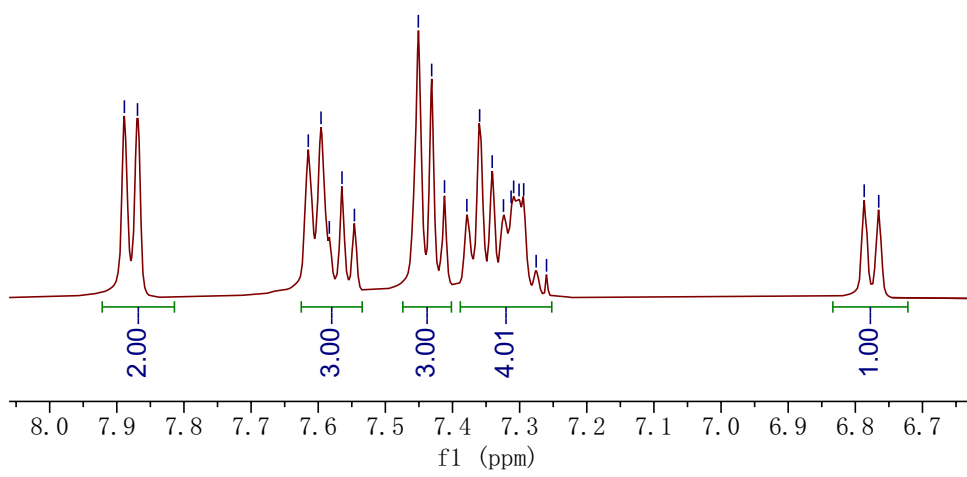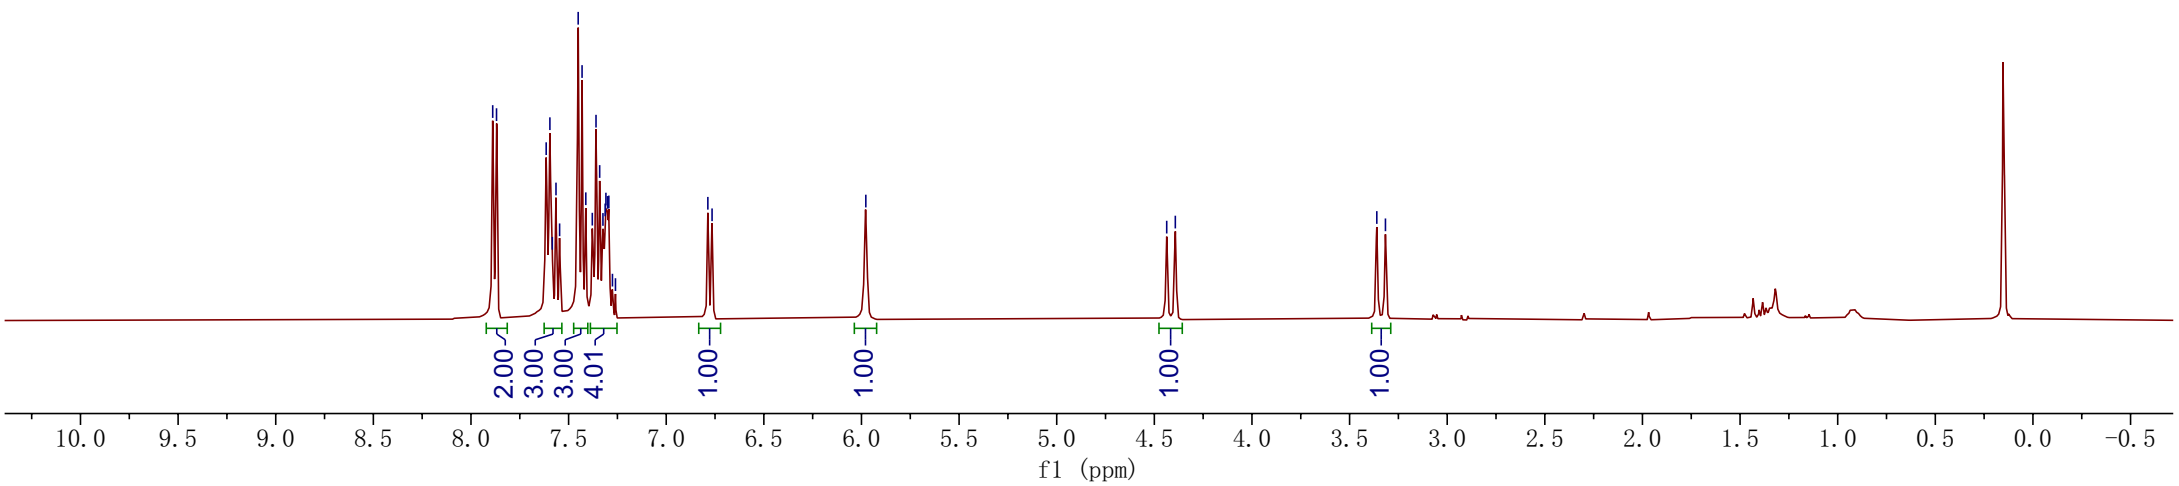

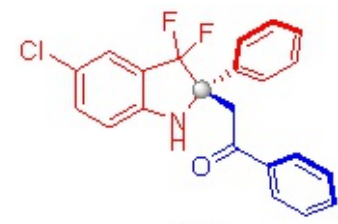

**3sa**  
<sup>13</sup>C NMR (100 MHz, CDCl<sub>3</sub>)

198.09  
198.08  
148.20  
148.15  
148.12  
148.07  
136.88  
136.83  
136.67  
133.72  
133.00  
128.63  
128.44  
128.27  
127.93  
127.85  
126.41  
125.94  
124.33  
123.73  
123.71  
123.69  
123.43  
121.72  
121.47  
121.21  
112.33

77.32  
77.00  
76.68  
72.56  
72.35  
72.29  
72.08

41.80  
41.78  
41.71  
41.68

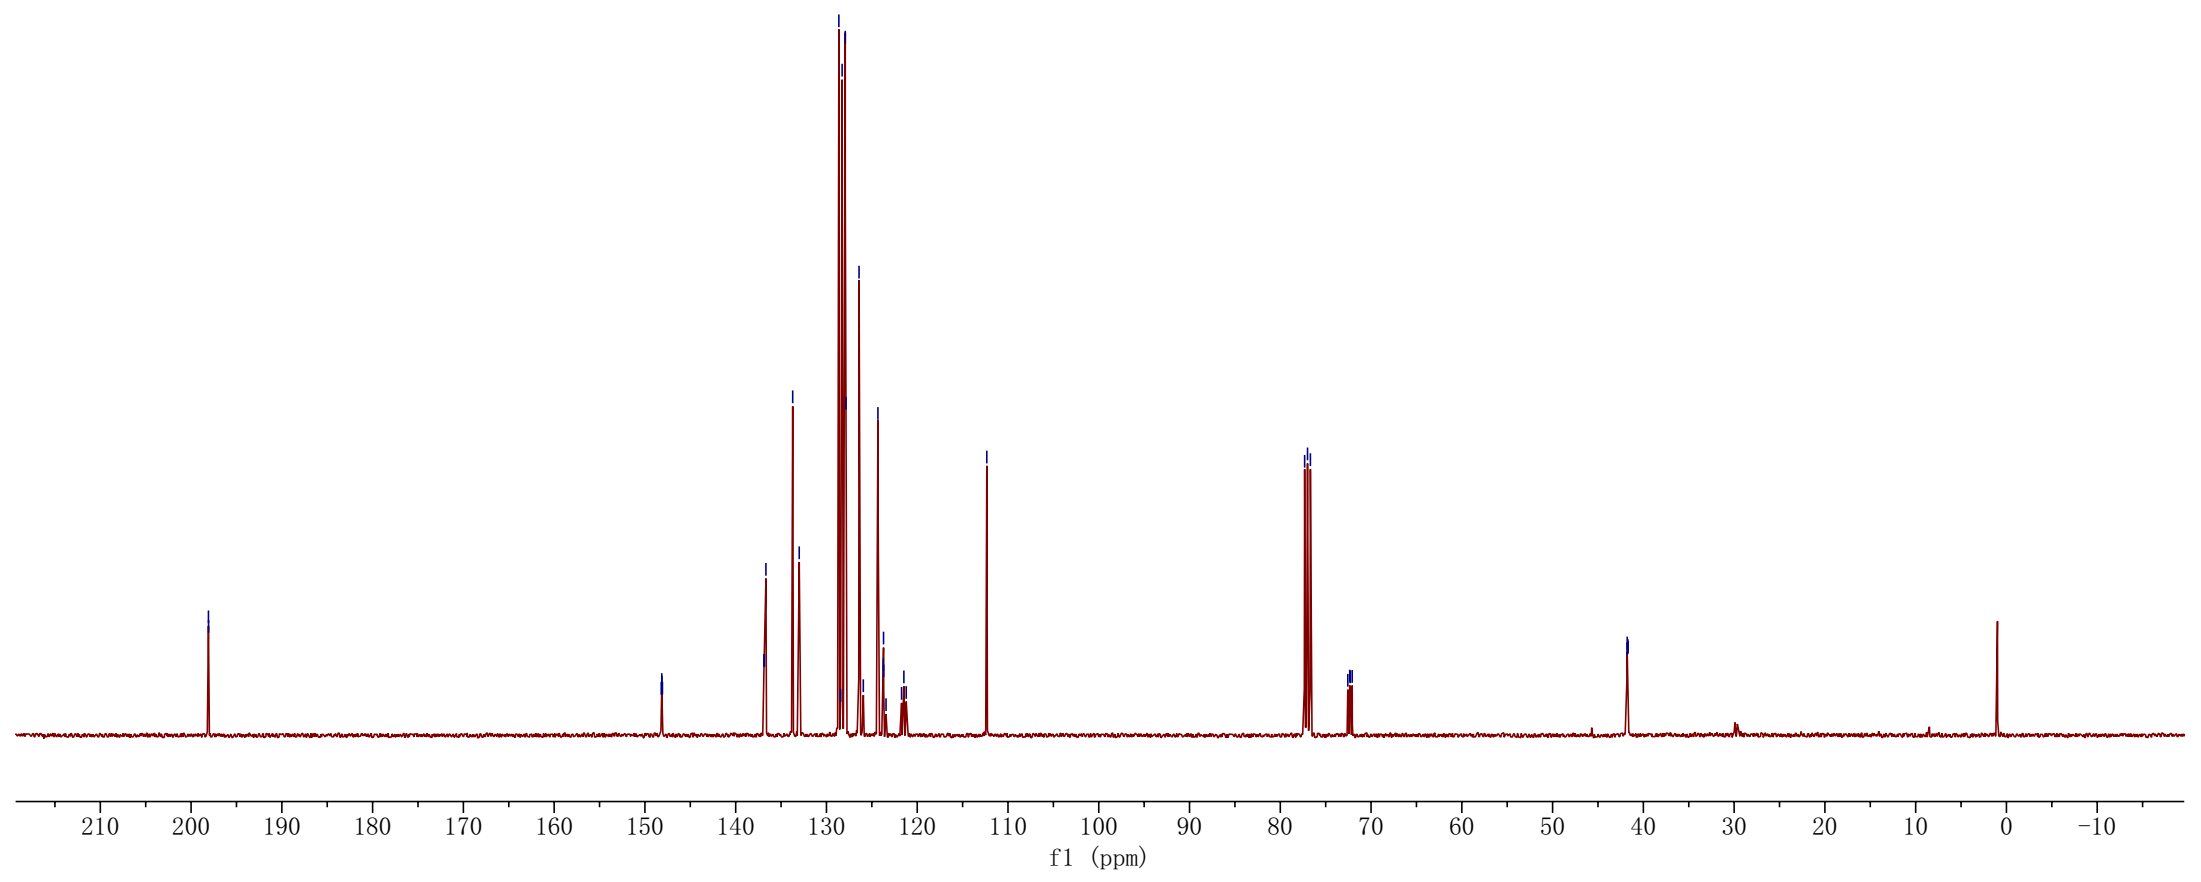

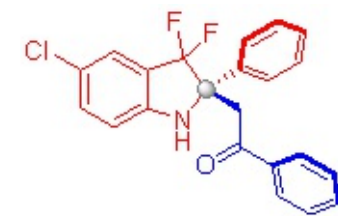

**35a**  
<sup>19</sup>F NMR (376 MHz, CDCl<sub>3</sub>)

-85.58  
-86.24

-106.52  
-107.18

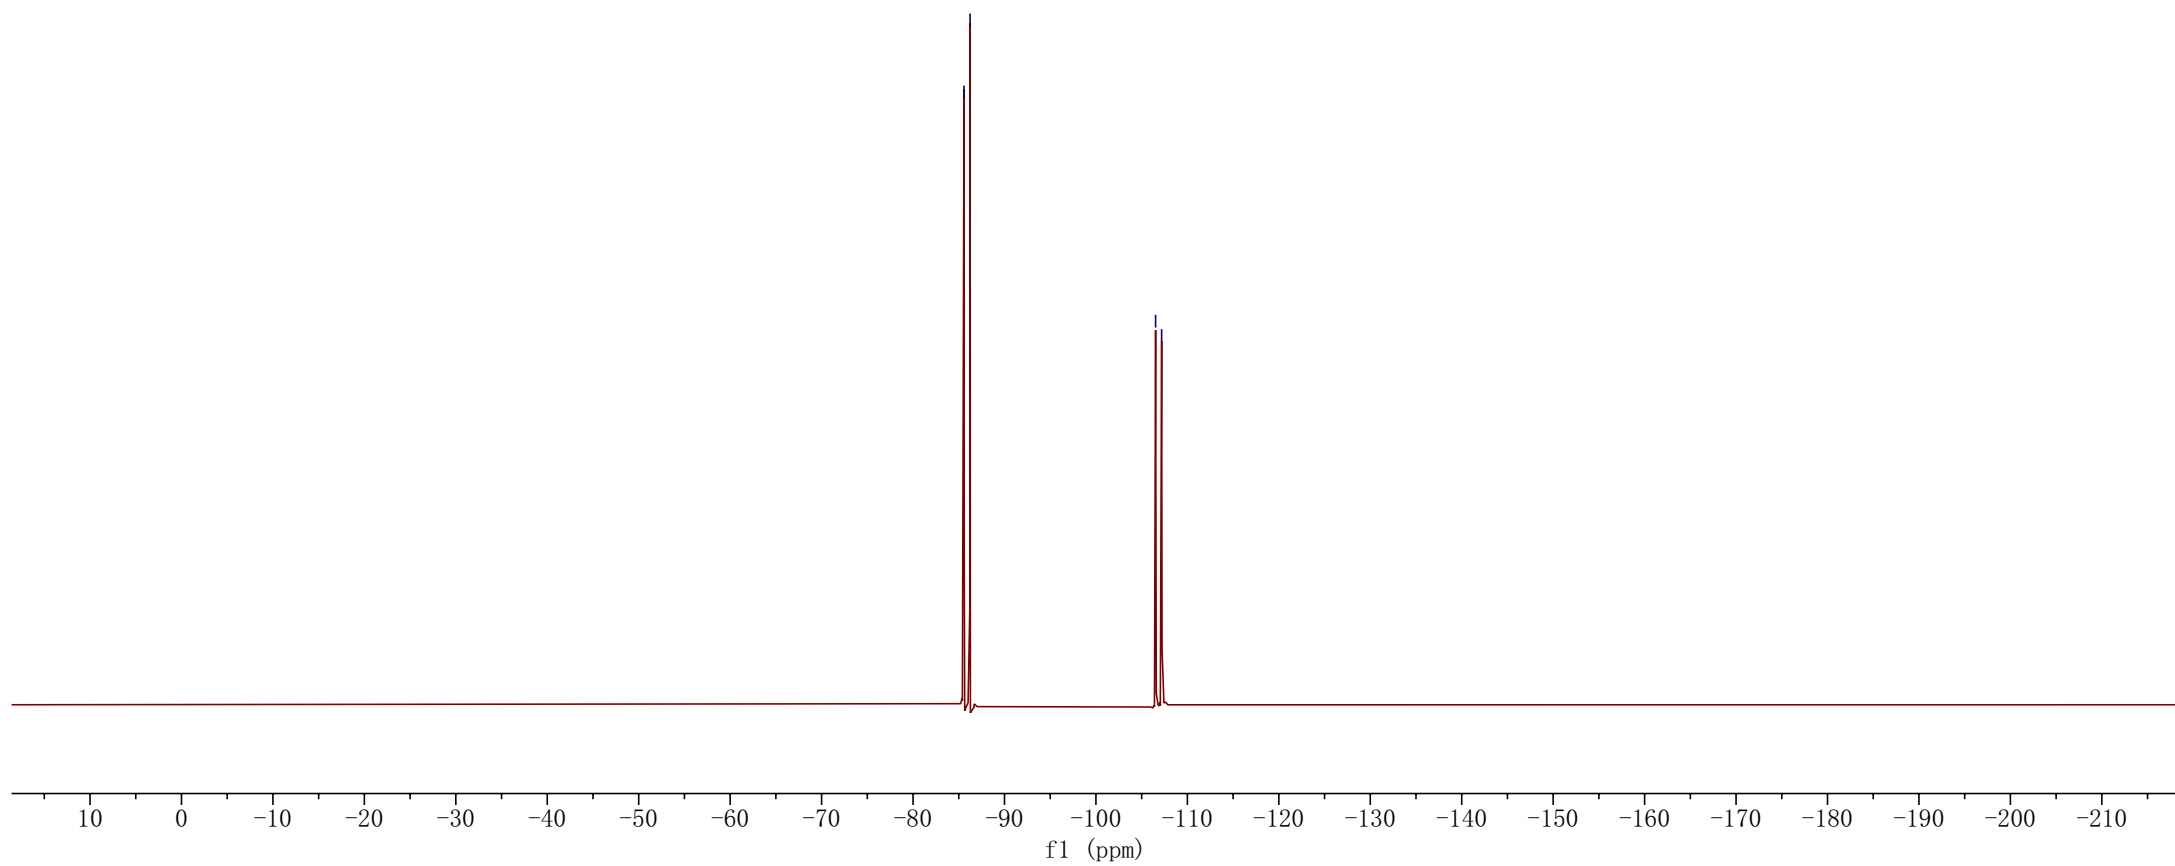



7.875  
7.872  
7.868  
7.854  
7.851  
7.592  
7.588  
7.574  
7.570  
7.568  
7.564  
7.549  
7.531  
7.439  
7.422  
7.419  
7.400  
7.347  
7.343  
7.340  
7.328  
7.323  
7.318  
7.303  
7.270  
7.260  
7.252  
6.693  
6.673  
6.666  
6.666

4.397  
4.392  
4.352  
4.348

3.356  
3.352  
3.349  
3.311  
3.308  
3.305

2.343

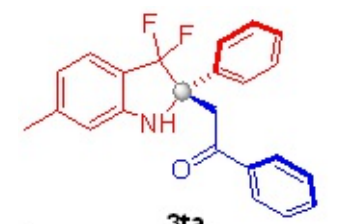

<sup>1</sup>H NMR (400 MHz, CDCl<sub>3</sub>)

7.875  
7.872  
7.868  
7.854  
7.851  
7.592  
7.588  
7.574  
7.570  
7.568  
7.564  
7.549  
7.531  
7.439  
7.422  
7.419  
7.400  
7.347  
7.343  
7.340  
7.328  
7.323  
7.318  
7.303  
7.270  
7.260  
7.252  
6.693  
6.673  
6.666

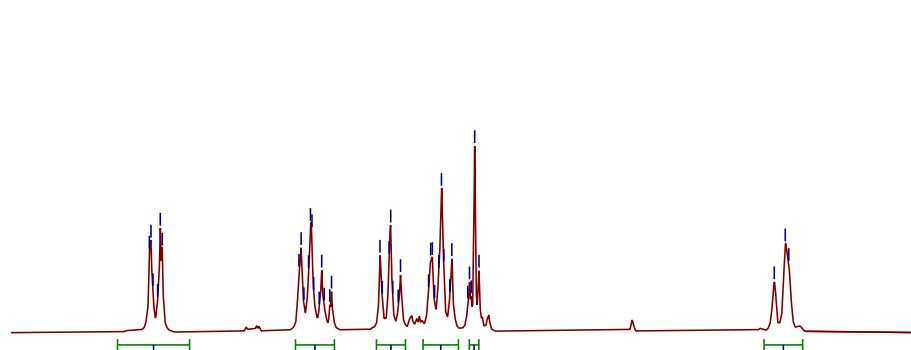

8.1 8.0 7.9 7.8 7.7 7.6 7.5 7.4 7.3 7.2 7.1 7.0 6.9 6.8 6.7 6.6 6.5  
f1 (ppm)

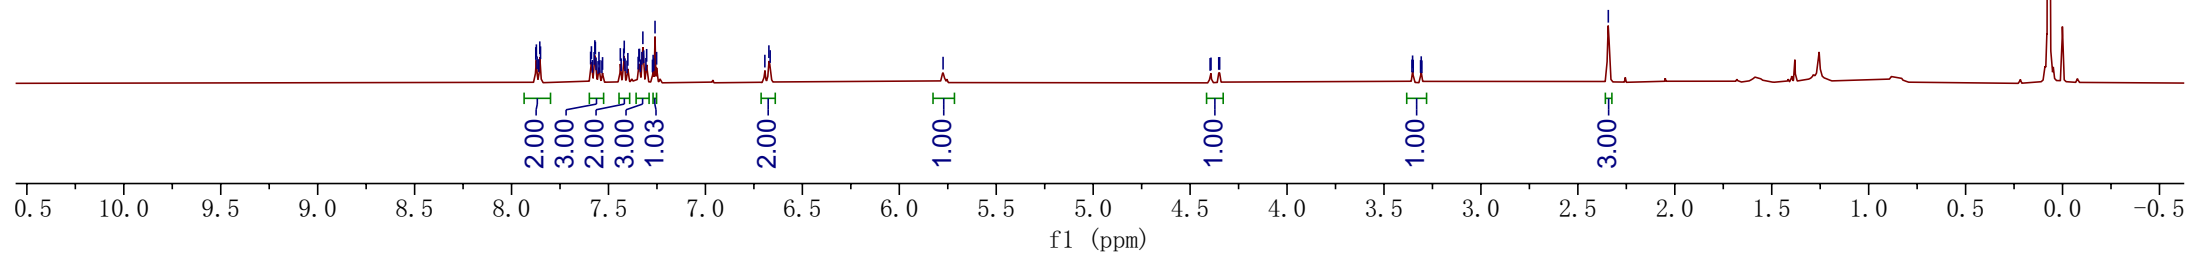

0.5 10.0 9.5 9.0 8.5 8.0 7.5 7.0 6.5 6.0 5.5 5.0 4.5 4.0 3.5 3.0 2.5 2.0 1.5 1.0 0.5 0.0 -0.5  
f1 (ppm)

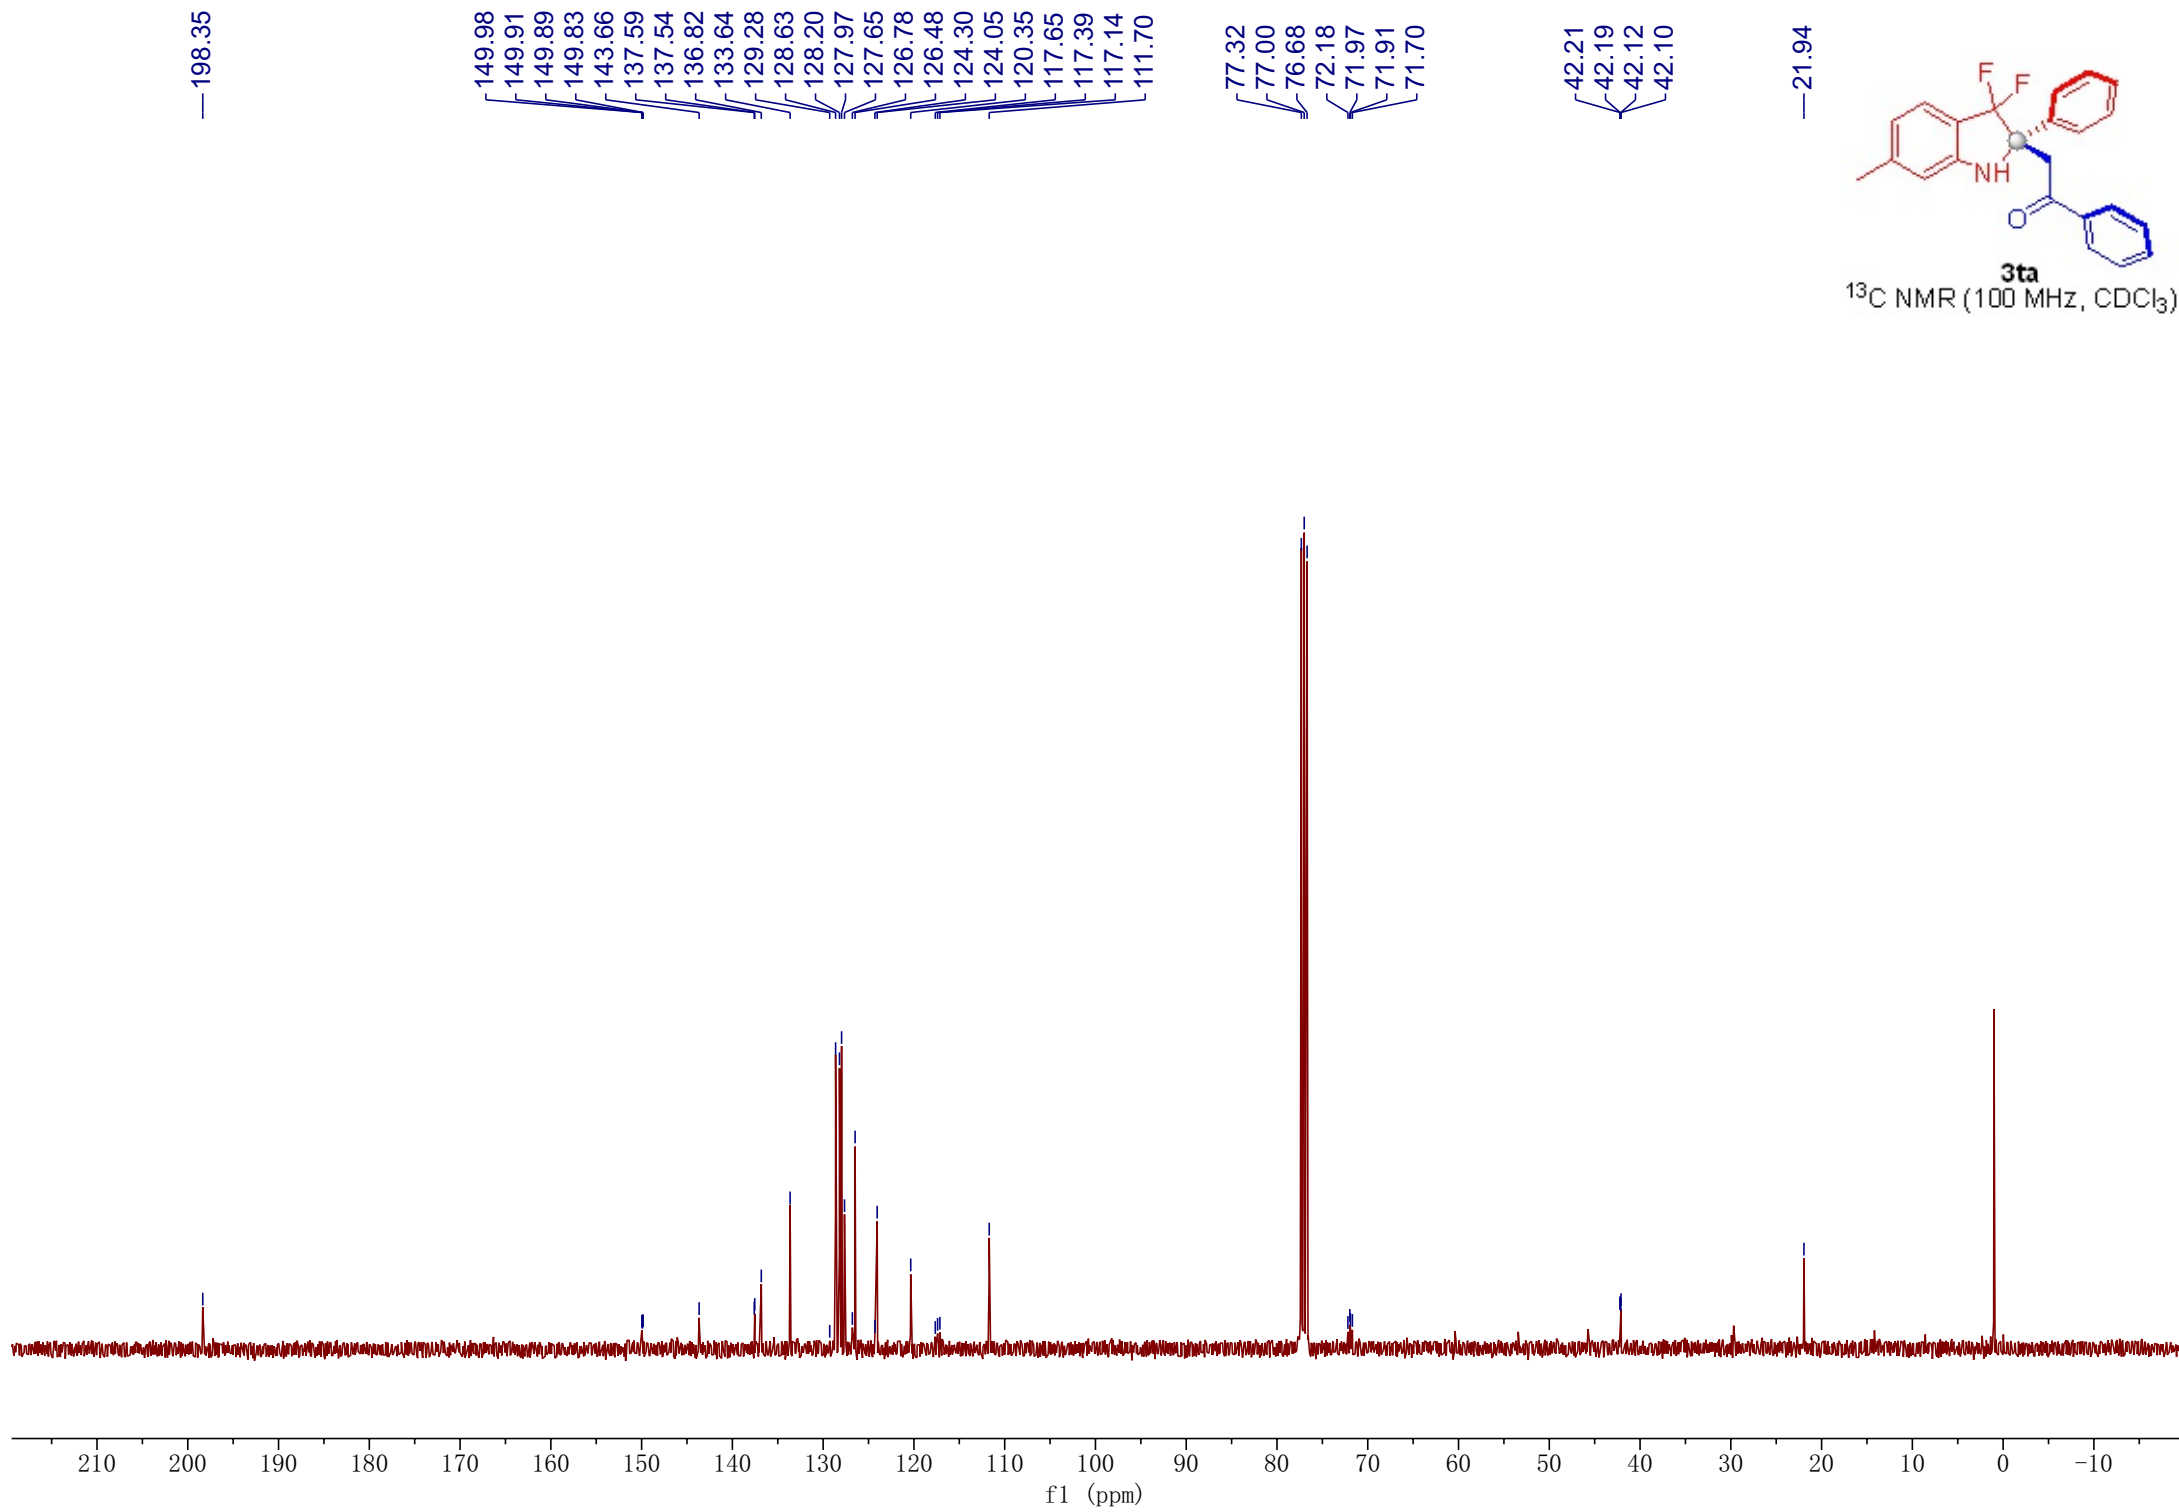

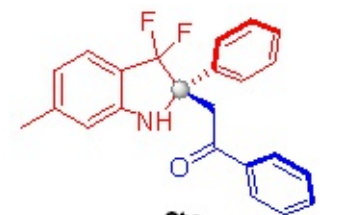

<sup>19</sup>F NMR (376 MHz, CDCl<sub>3</sub>)

--84.56  
--85.21

--106.60  
--107.25

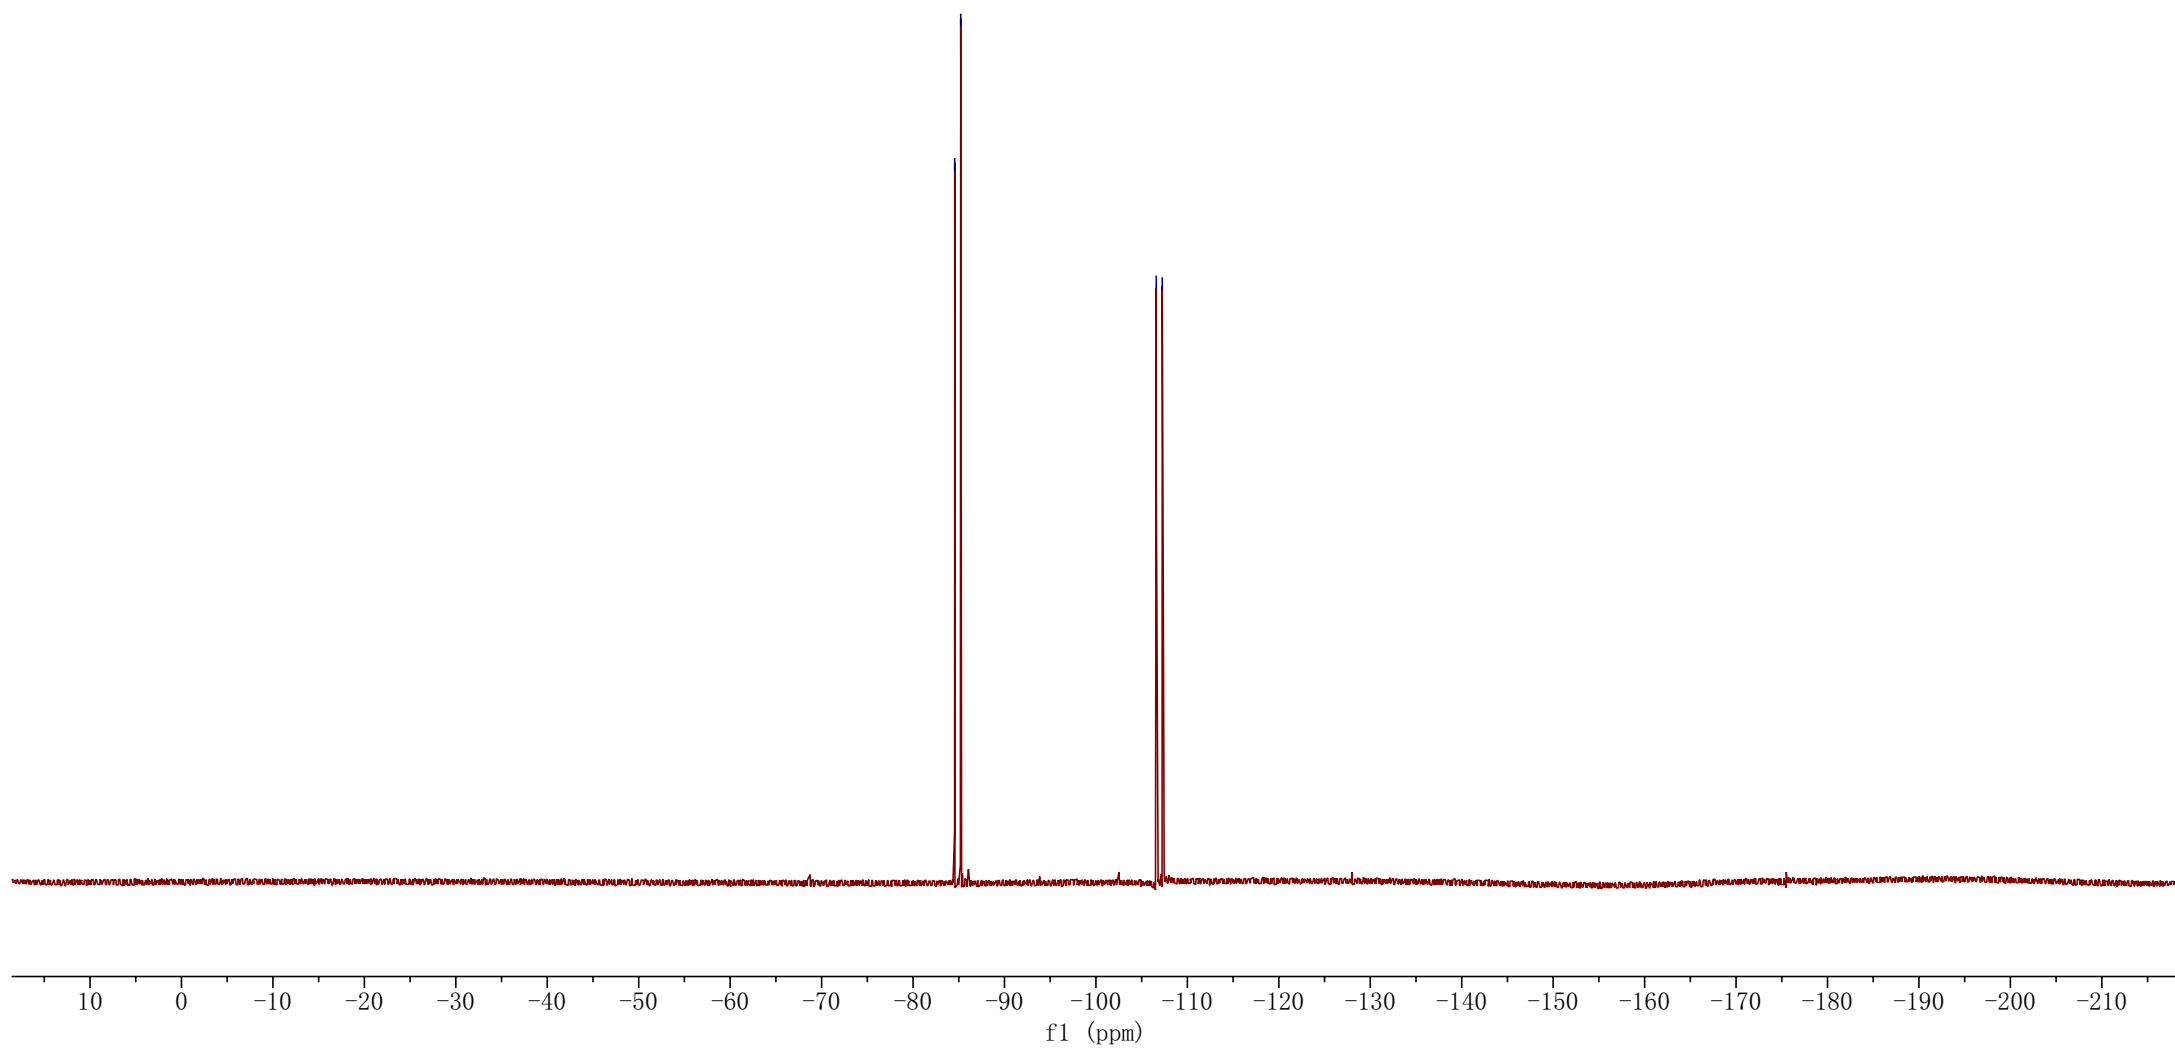

7.794  
7.791  
7.773  
7.769  
7.491  
7.488  
7.485  
7.482  
7.477  
7.470  
7.465  
7.458  
7.454  
7.451  
7.448  
7.357  
7.353  
7.337  
7.326  
7.323  
7.318  
7.309  
7.304  
7.295  
7.291  
7.287  
7.265  
7.262  
7.257  
7.244  
7.240  
7.229  
7.225  
7.200  
7.196  
7.193  
7.184  
7.178  
7.172  
7.165  
7.160  
6.475  
6.470  
6.455  
6.452  
6.449  
6.447  
6.443  
6.439  
6.432  
6.426  
6.419  
6.415  
5.921  
4.335  
4.330  
4.290  
4.286  
3.261  
3.217

7.794  
7.791  
7.773  
7.769  
7.485  
7.482  
7.477  
7.470  
7.465  
7.458  
7.454  
7.451  
7.448  
7.357  
7.353  
7.337  
7.323  
7.318  
7.262  
7.244  
7.240  
7.225  
7.196  
7.178  
7.165  
6.449  
6.447  
6.443  
6.426  
6.419

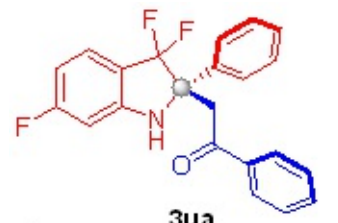

<sup>1</sup>H NMR (400 MHz, CDCl<sub>3</sub>)

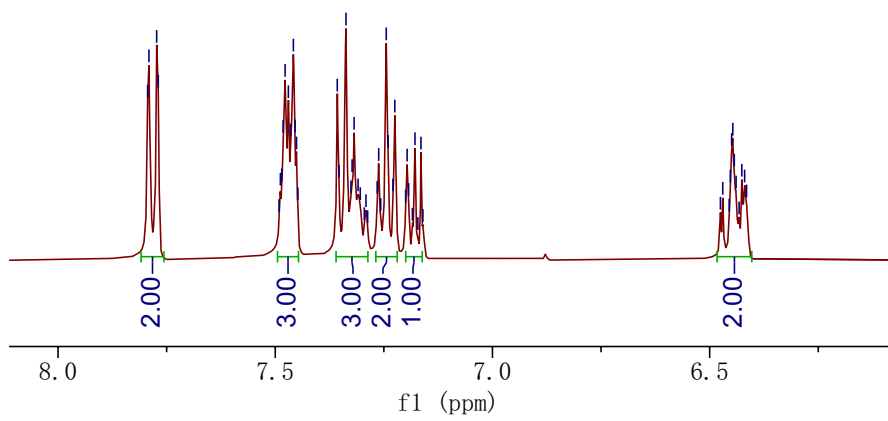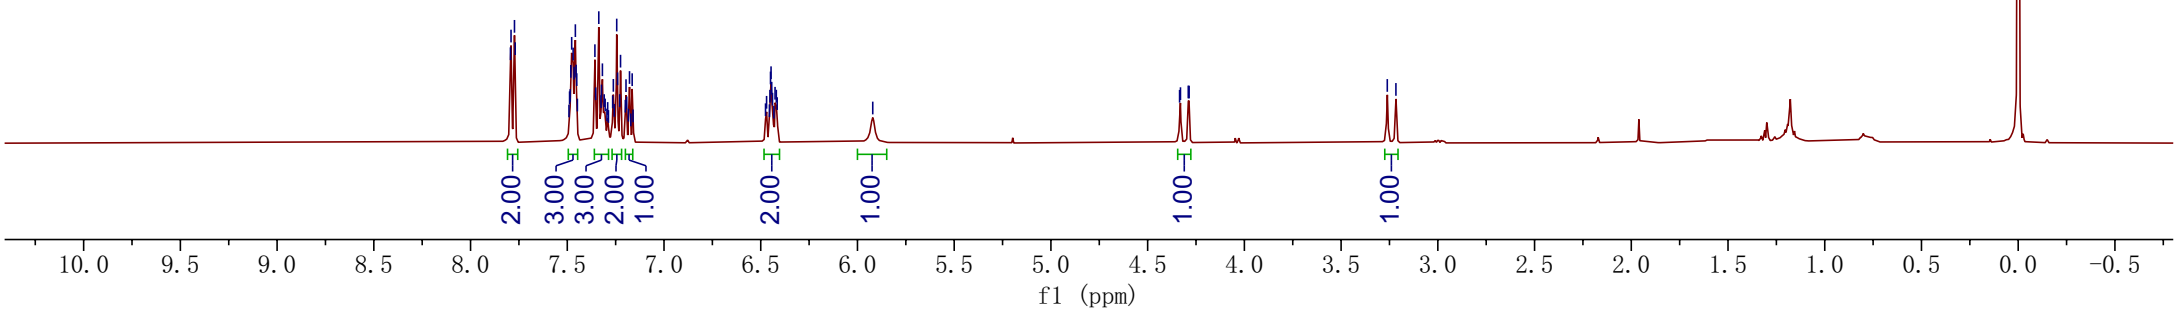

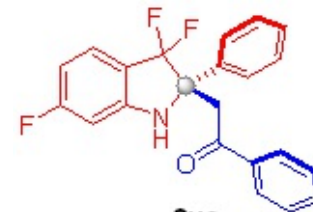

**3ua**

<sup>13</sup>C NMR (100 MHz, CDCl<sub>3</sub>)

198.19  
198.17

167.76  
165.29  
151.45  
151.38  
137.06  
137.01  
136.70  
133.77  
128.68  
128.41  
128.31  
127.99  
127.85  
126.36  
126.06  
125.95  
125.92  
123.43  
116.20  
115.96  
115.70  
106.60  
106.36  
98.57  
98.31  
77.32  
77.00  
76.68  
72.69  
72.48  
72.42  
72.20

42.07  
42.05  
41.98  
41.96

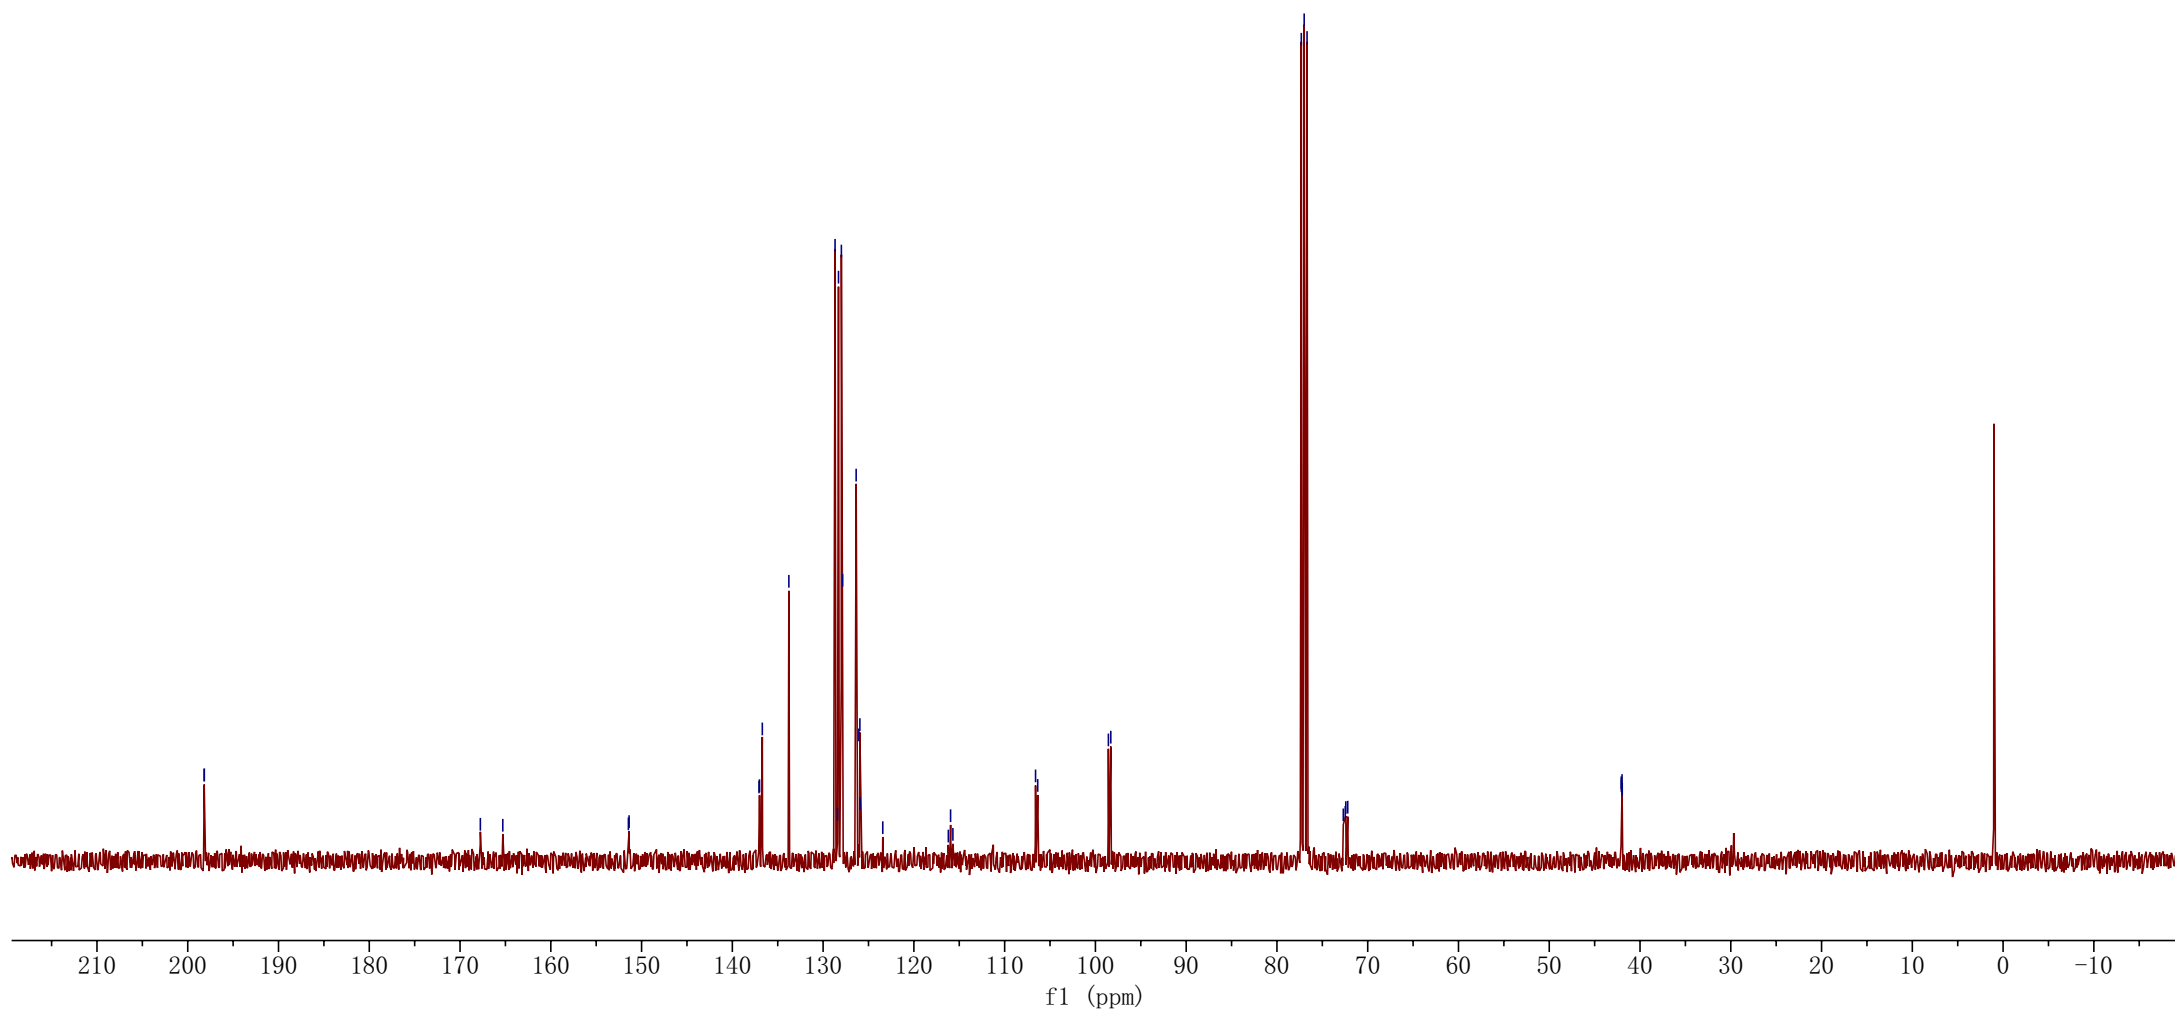

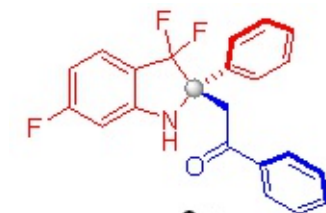

**3ua**  
<sup>19</sup>F NMR (376 MHz, CDCl<sub>3</sub>)

84.31  
84.32  
84.97  
84.98

105.43  
105.44  
106.08  
106.10  
106.91

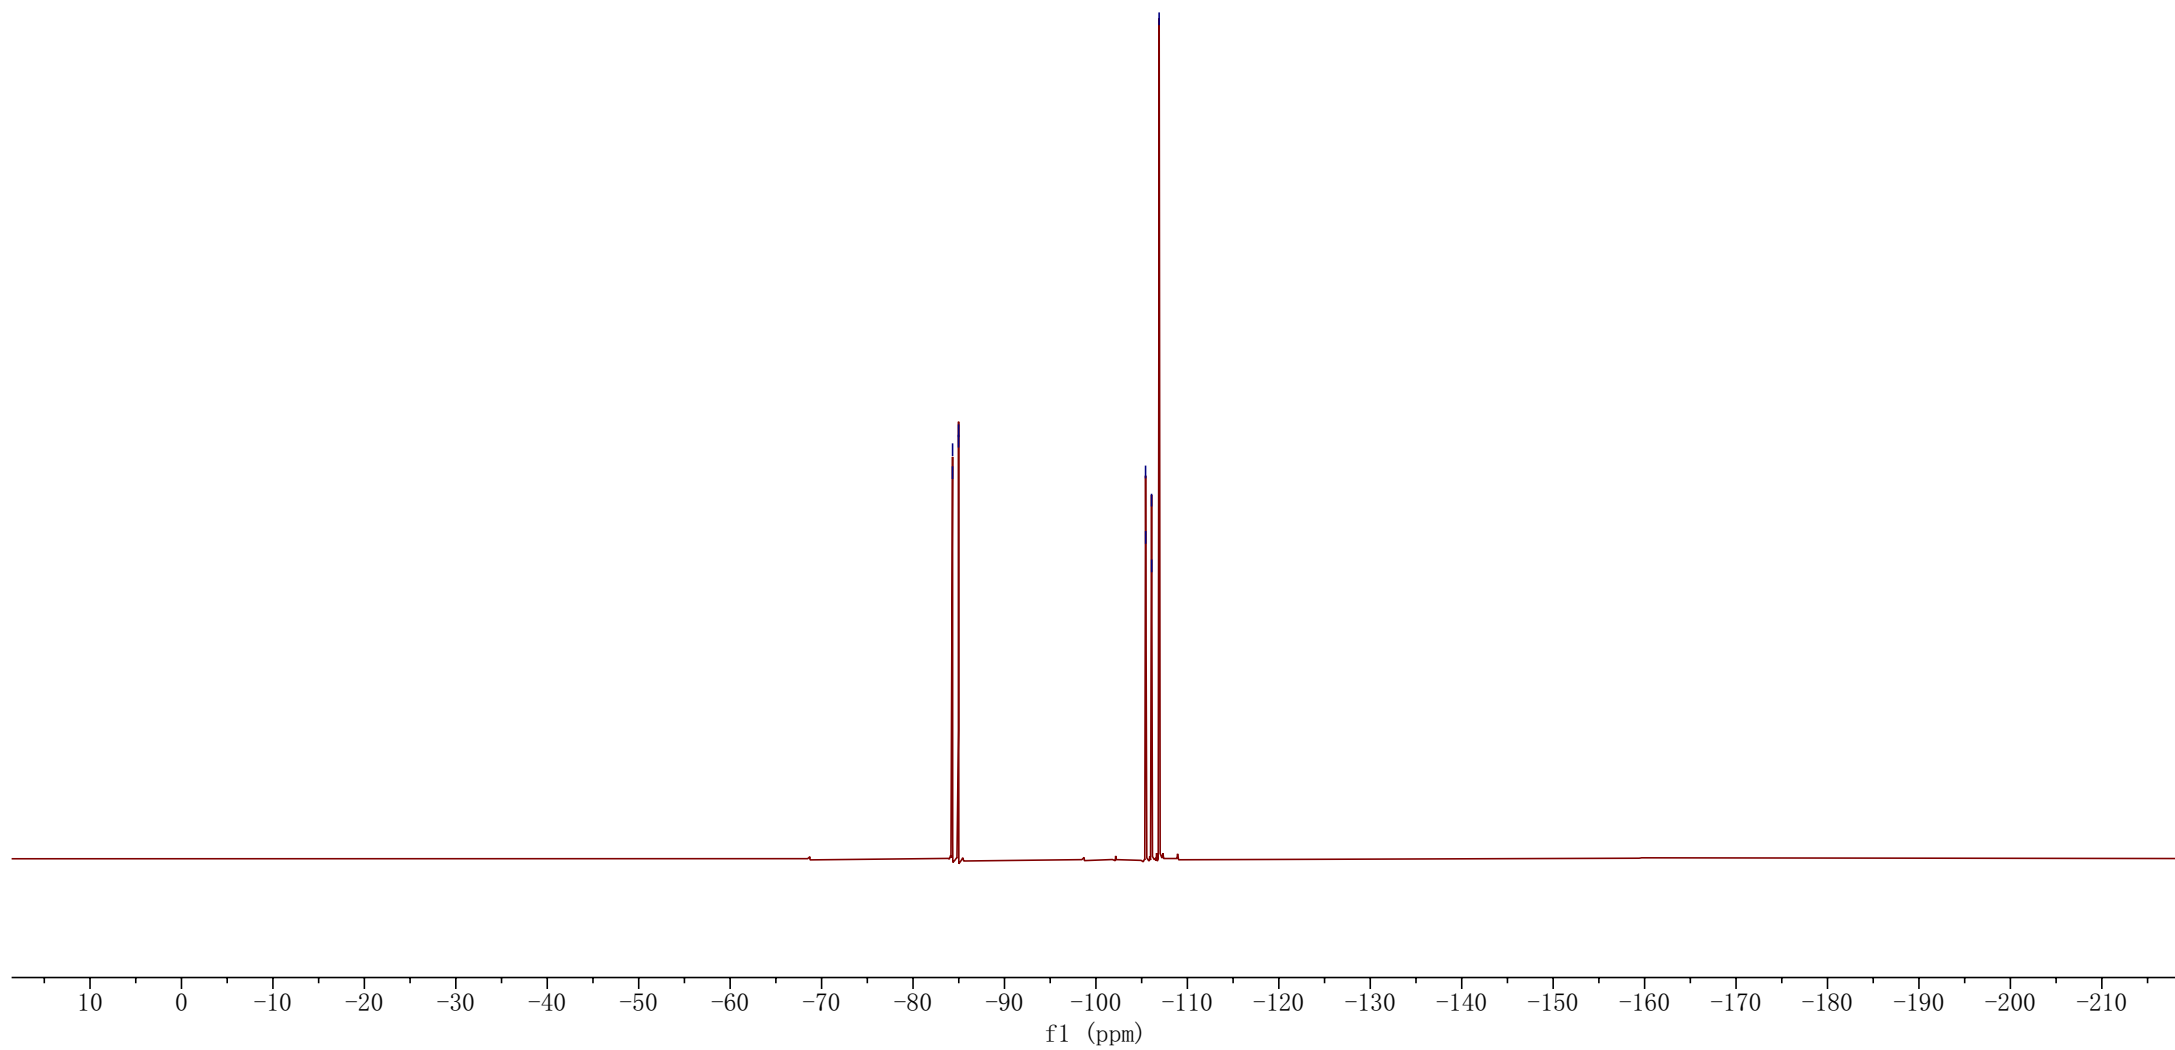

7.883  
7.864  
7.579  
7.575  
7.565  
7.564  
7.562  
7.560  
7.550  
7.546  
7.452  
7.432  
7.413  
7.377  
7.357  
7.344  
7.324  
7.296  
7.278  
7.260  
6.841  
6.837  
6.833  
6.828  
—6.003

7.883  
7.864  
7.579  
7.575  
7.565  
7.564  
7.562  
7.560  
7.550  
7.546  
7.452  
7.432  
7.413  
7.377  
7.357  
7.344  
7.324  
7.296  
7.278  
7.260  
6.841  
6.837  
6.833  
6.828

4.425  
4.382

3.346  
3.301

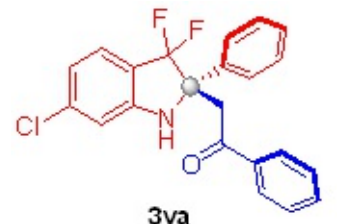

<sup>1</sup>H NMR (400 MHz, CDCl<sub>3</sub>)

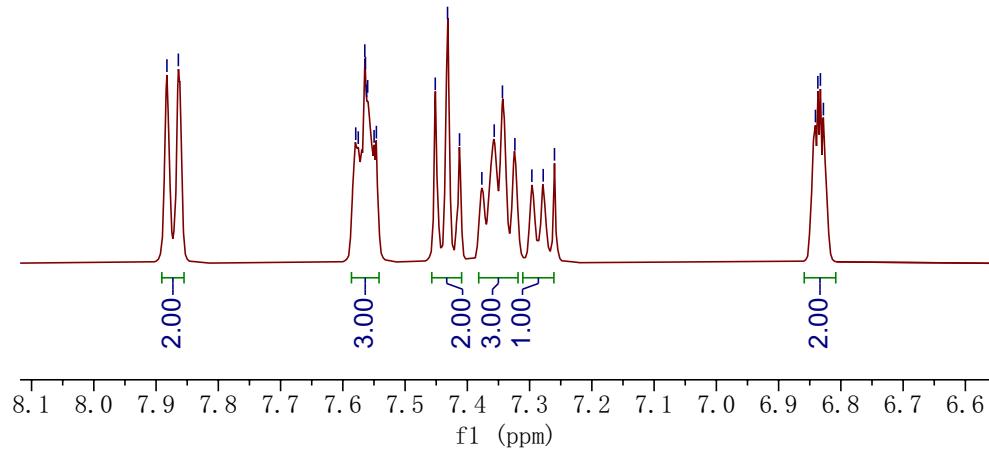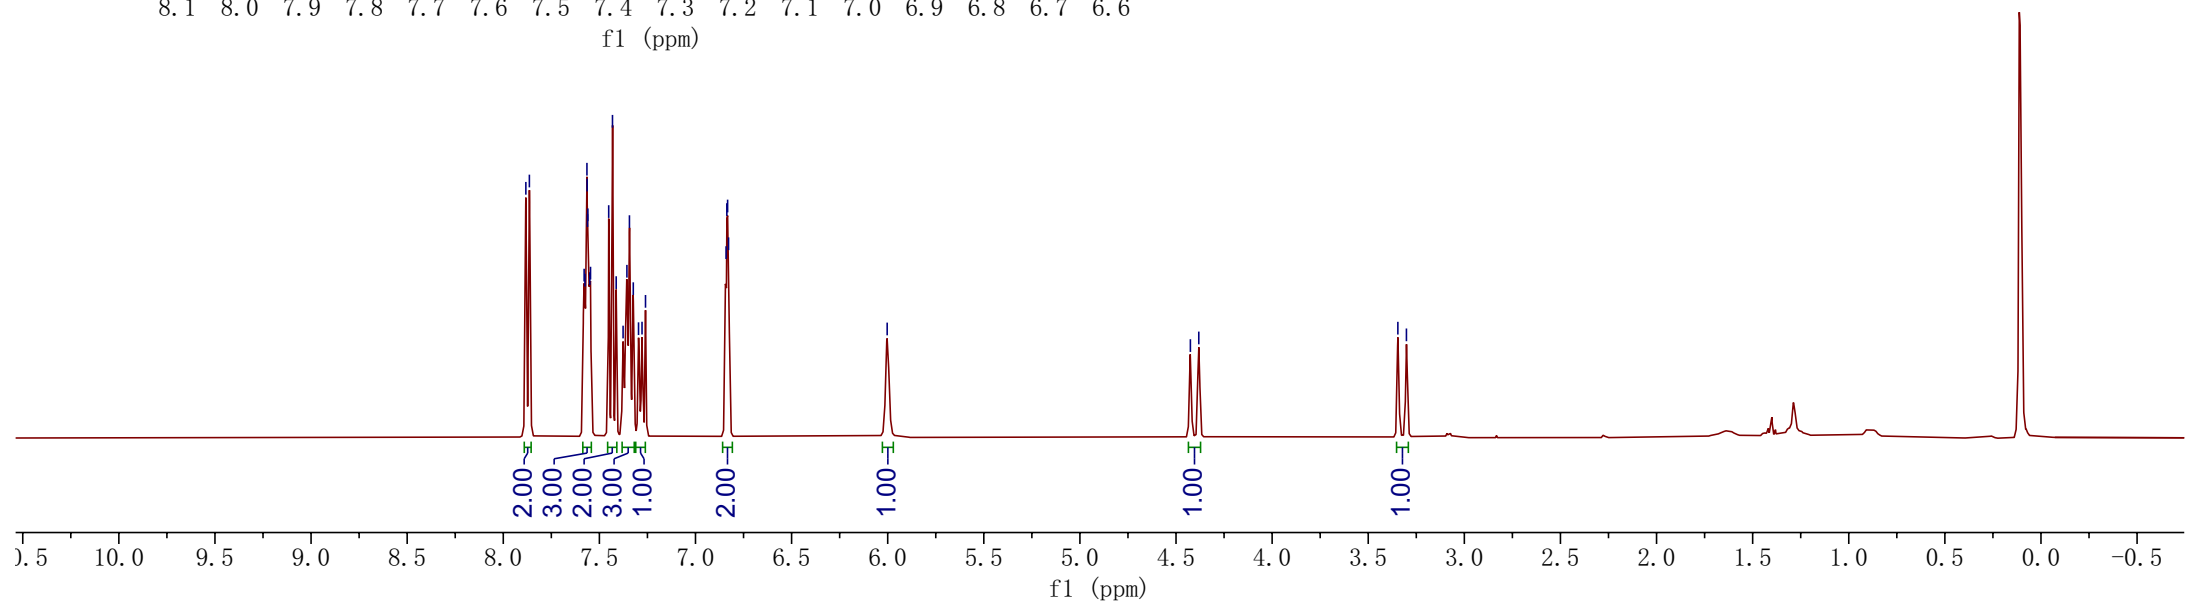

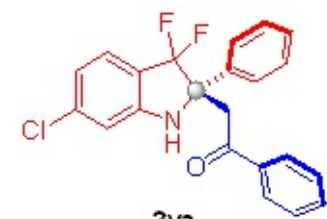

3va

$^{13}\text{C}$  NMR (100 MHz,  $\text{CDCl}_3$ )

198.12  
198.10  
150.69  
150.64  
150.62  
150.56  
139.01  
136.93  
136.87  
136.71  
133.76  
128.68  
128.41  
128.31  
127.97  
127.88  
126.38  
125.92  
125.39  
123.42  
119.44  
118.87  
118.61  
118.35  
111.27

77.32  
77.00  
76.68  
72.47  
72.25  
72.20  
71.98

41.97  
41.95  
41.87  
41.85

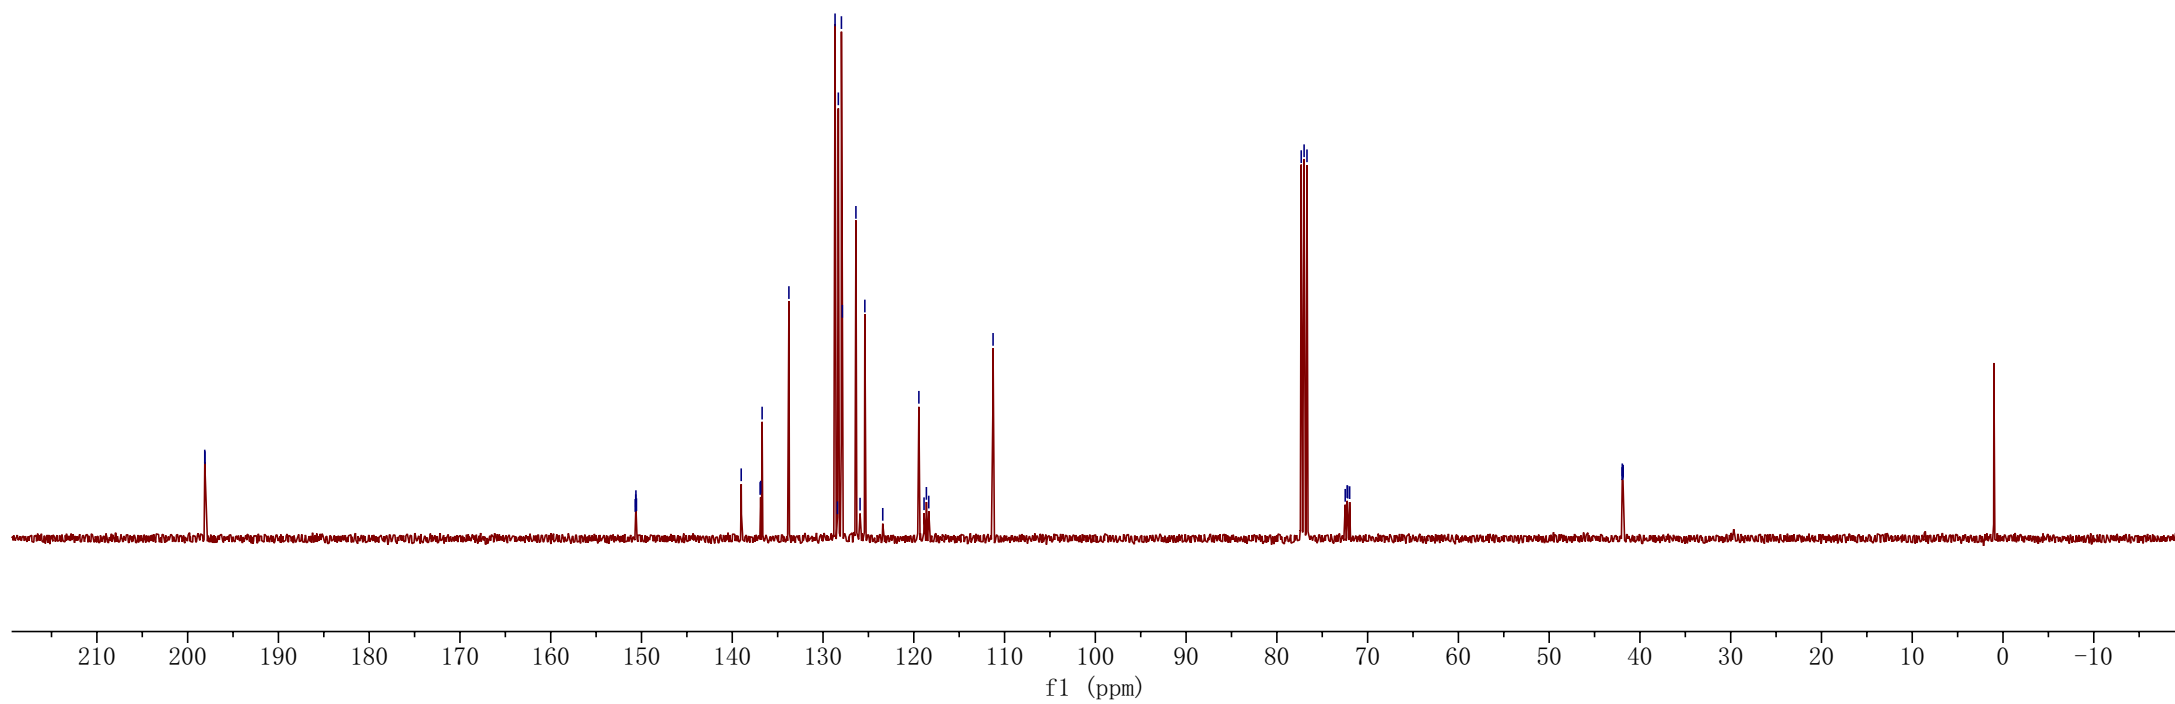



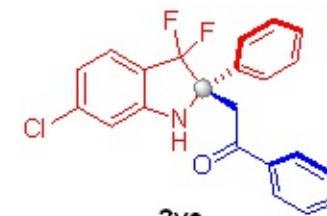

**3va**

$^{19}\text{F}$  NMR (376 MHz,  $\text{CDCl}_3$ )

-85.28  
-85.94

-106.04  
-106.70

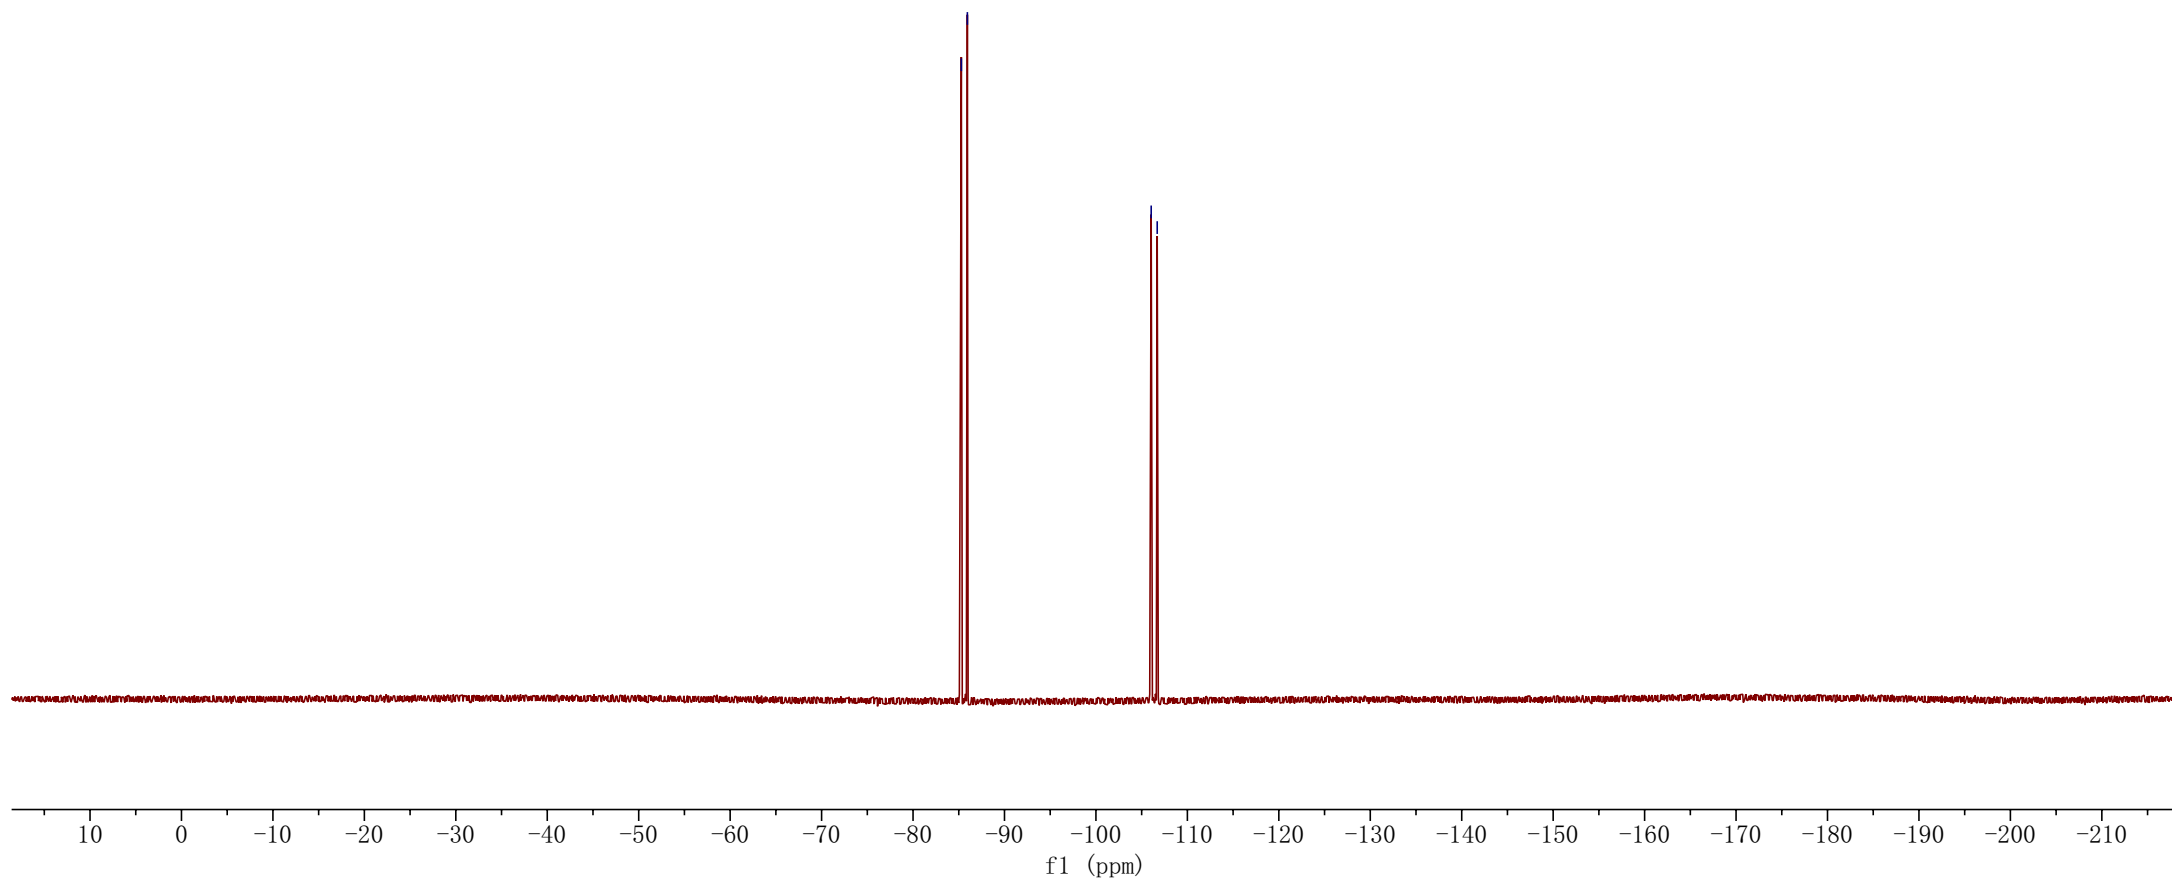

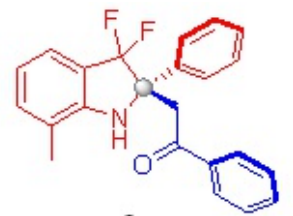

**3wa**  
<sup>1</sup>H NMR (400 MHz, CDCl<sub>3</sub>)

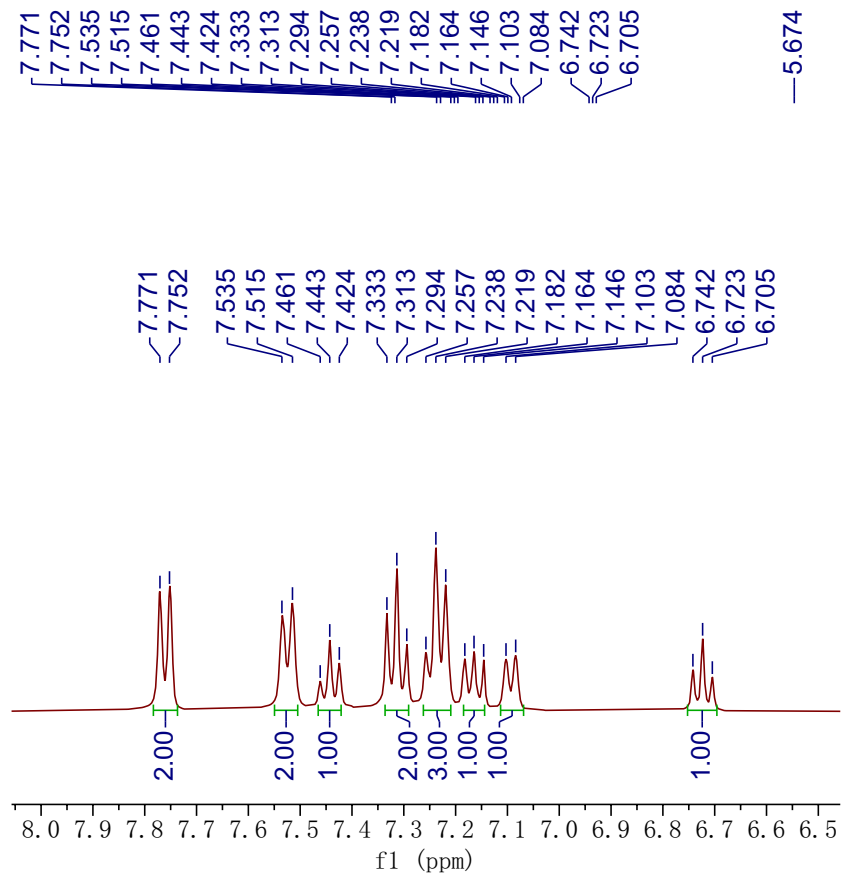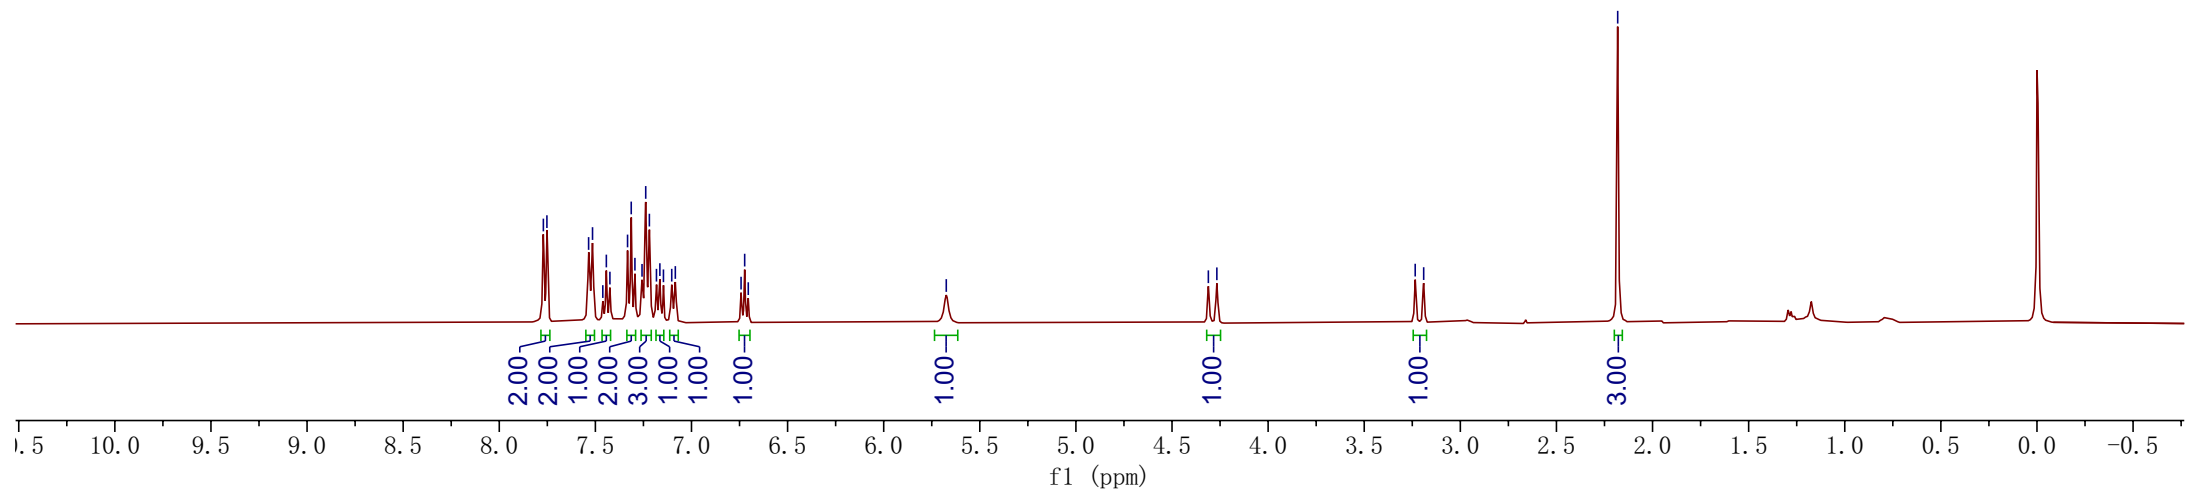

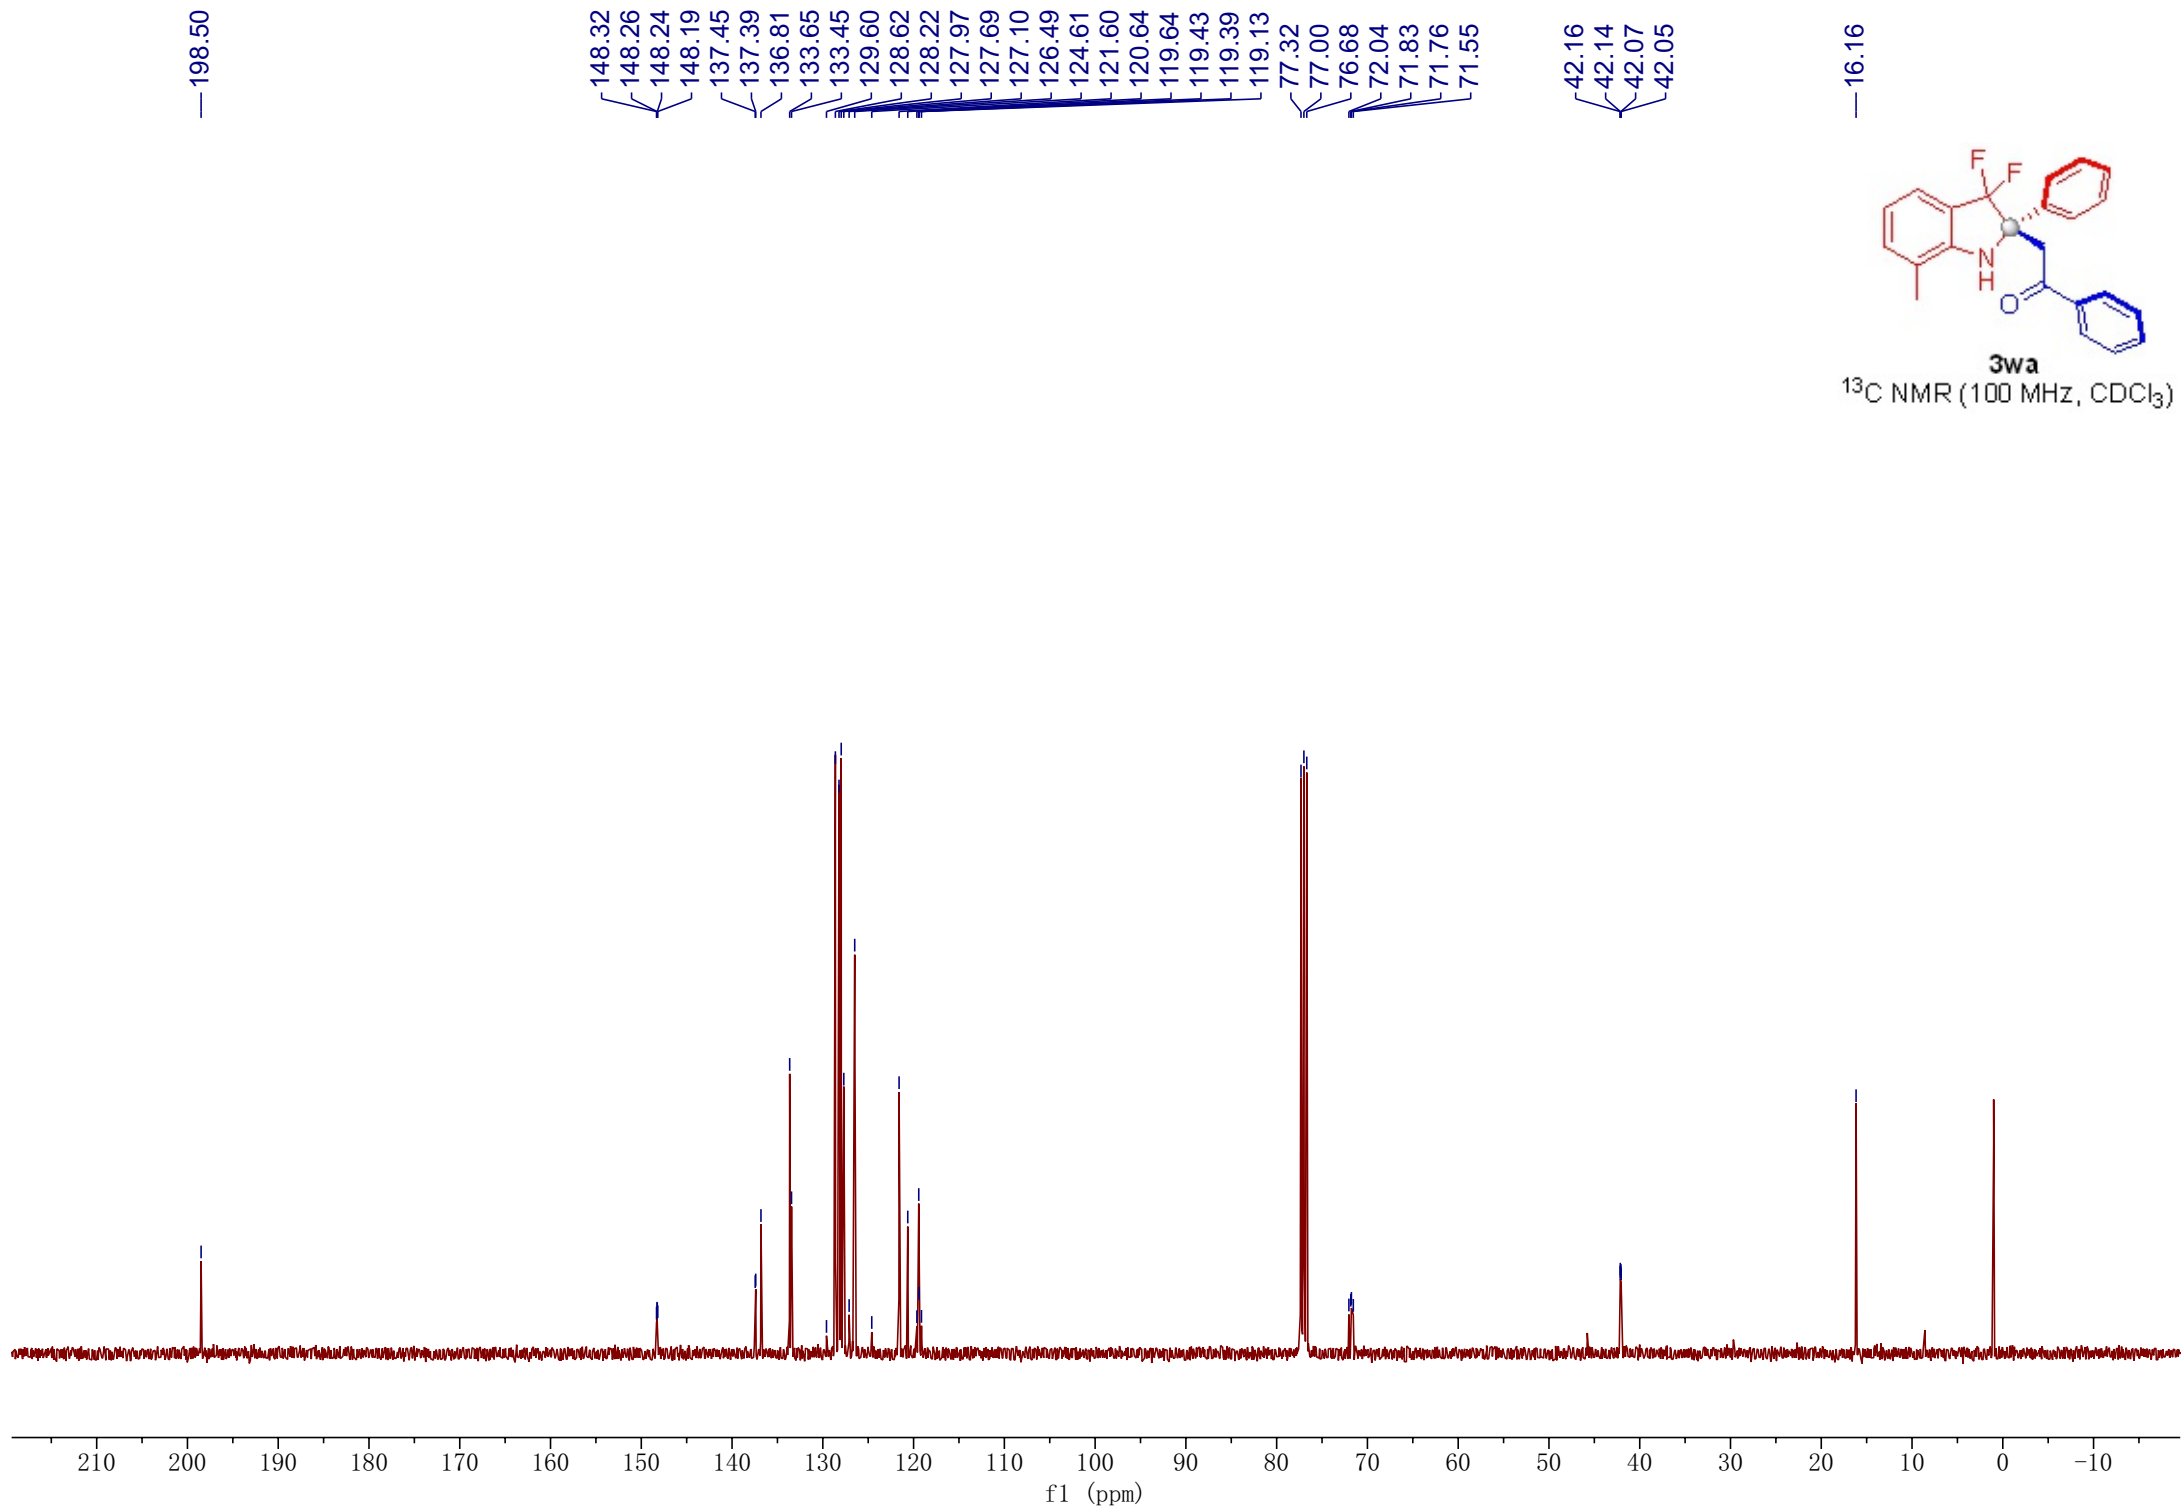

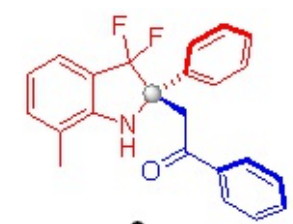

<sup>19</sup>F NMR (376 MHz, CDCl<sub>3</sub>)

-84.74  
-85.39

-106.45  
-107.11

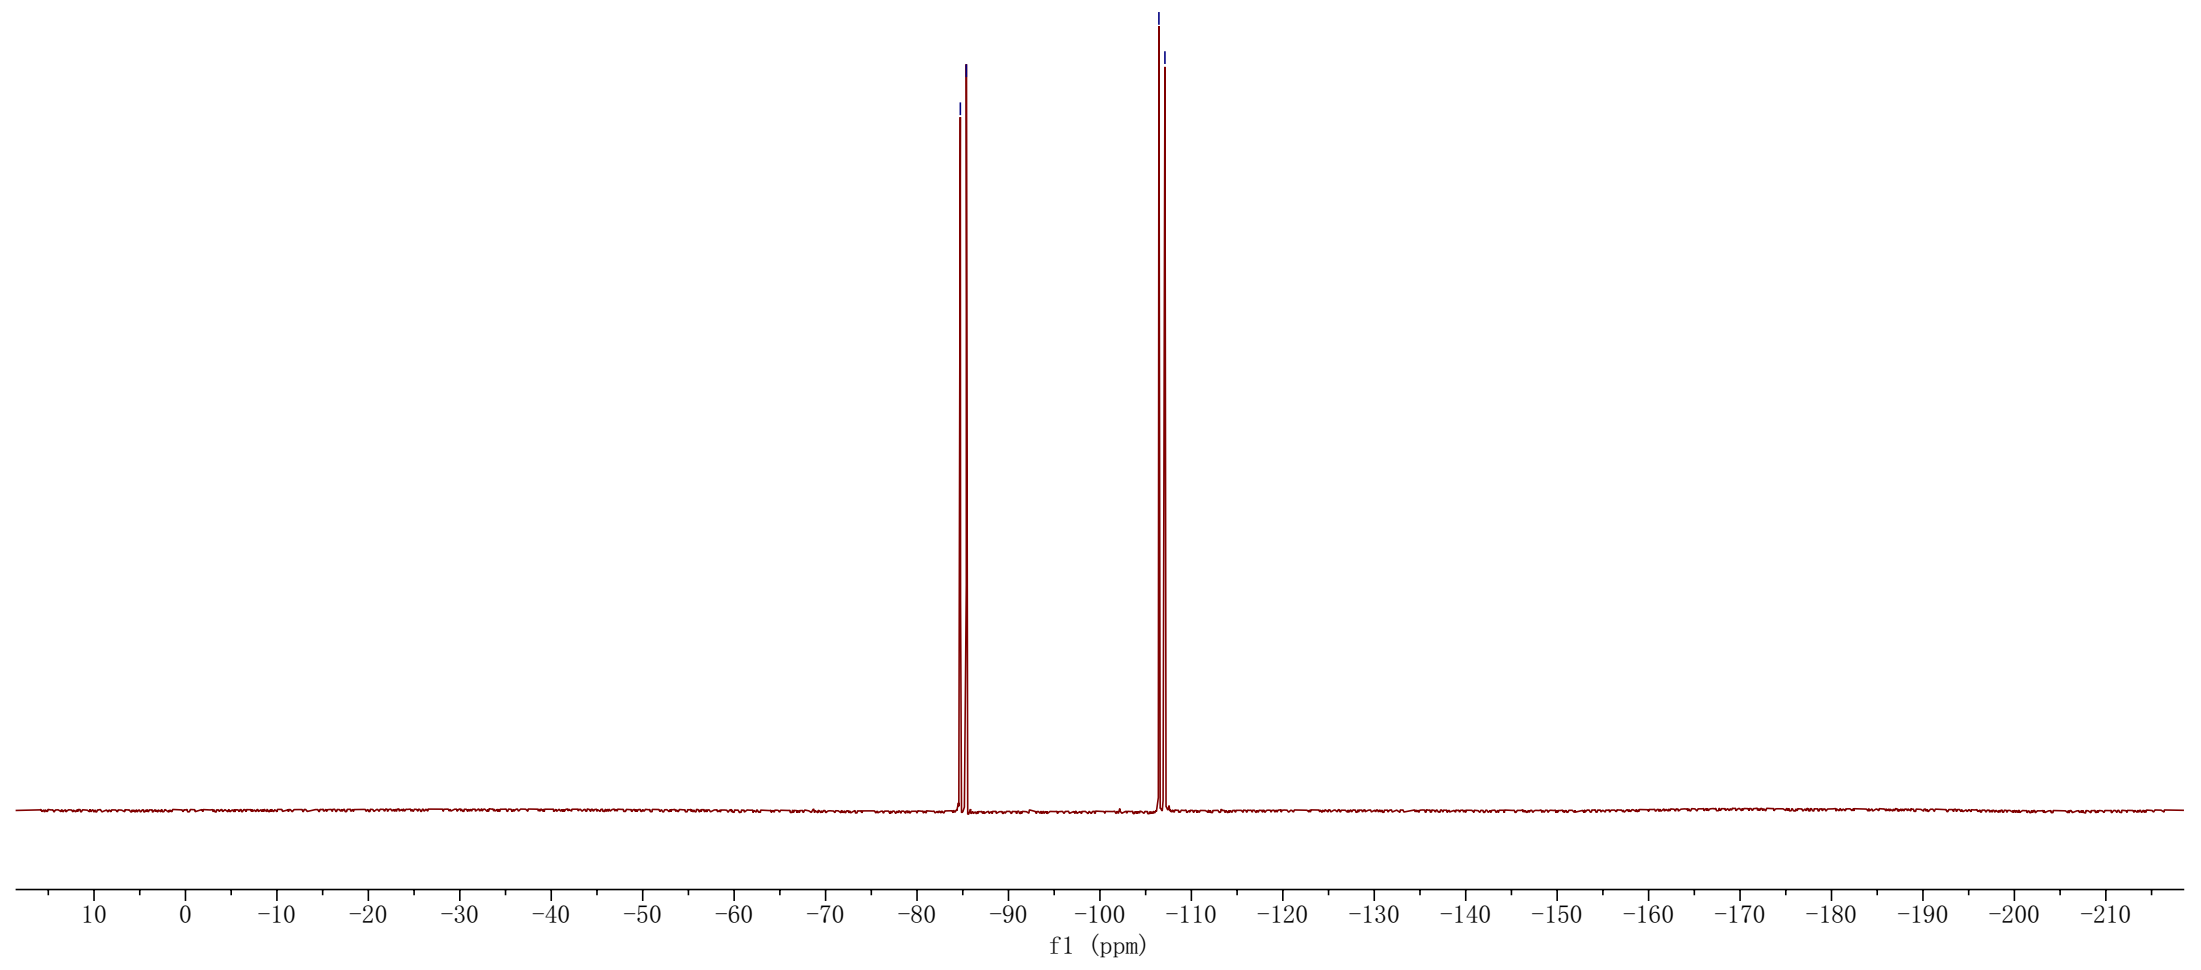

7.503  
7.499  
7.485  
7.481  
7.478  
7.428  
7.424  
7.409  
7.405  
7.382  
7.364  
7.289  
7.275  
7.271  
7.266  
7.262  
7.257  
7.253  
7.245  
7.239  
7.234  
7.230  
7.226  
7.207  
7.204  
7.190  
7.174  
7.158  
7.139  
7.076  
7.057  
6.826  
6.822  
6.819  
6.800  
5.910  
5.909  
5.904  
4.176  
4.138  
4.133

7.503  
7.499  
7.485  
7.481  
7.478  
7.428  
7.424  
7.409  
7.405  
7.382  
7.364  
7.289  
7.275  
7.271  
7.266  
7.262  
7.257  
7.253  
7.245  
7.239  
7.234  
7.230  
7.226  
7.207  
7.204  
7.190  
7.174  
7.158  
7.139  
7.204  
7.190  
7.174  
7.158  
7.139  
7.076  
7.057  
6.822  
6.819  
6.800

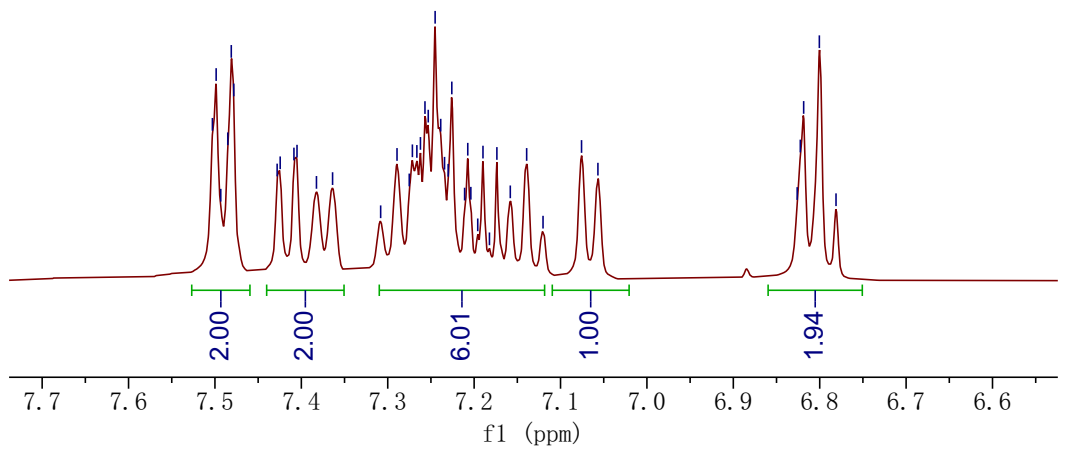

3.171  
3.128

2.042

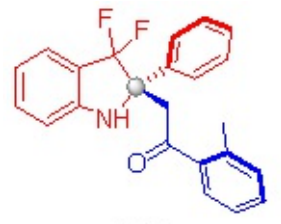

**3ab**

<sup>1</sup>H NMR (400MHz, CDCl<sub>3</sub>)

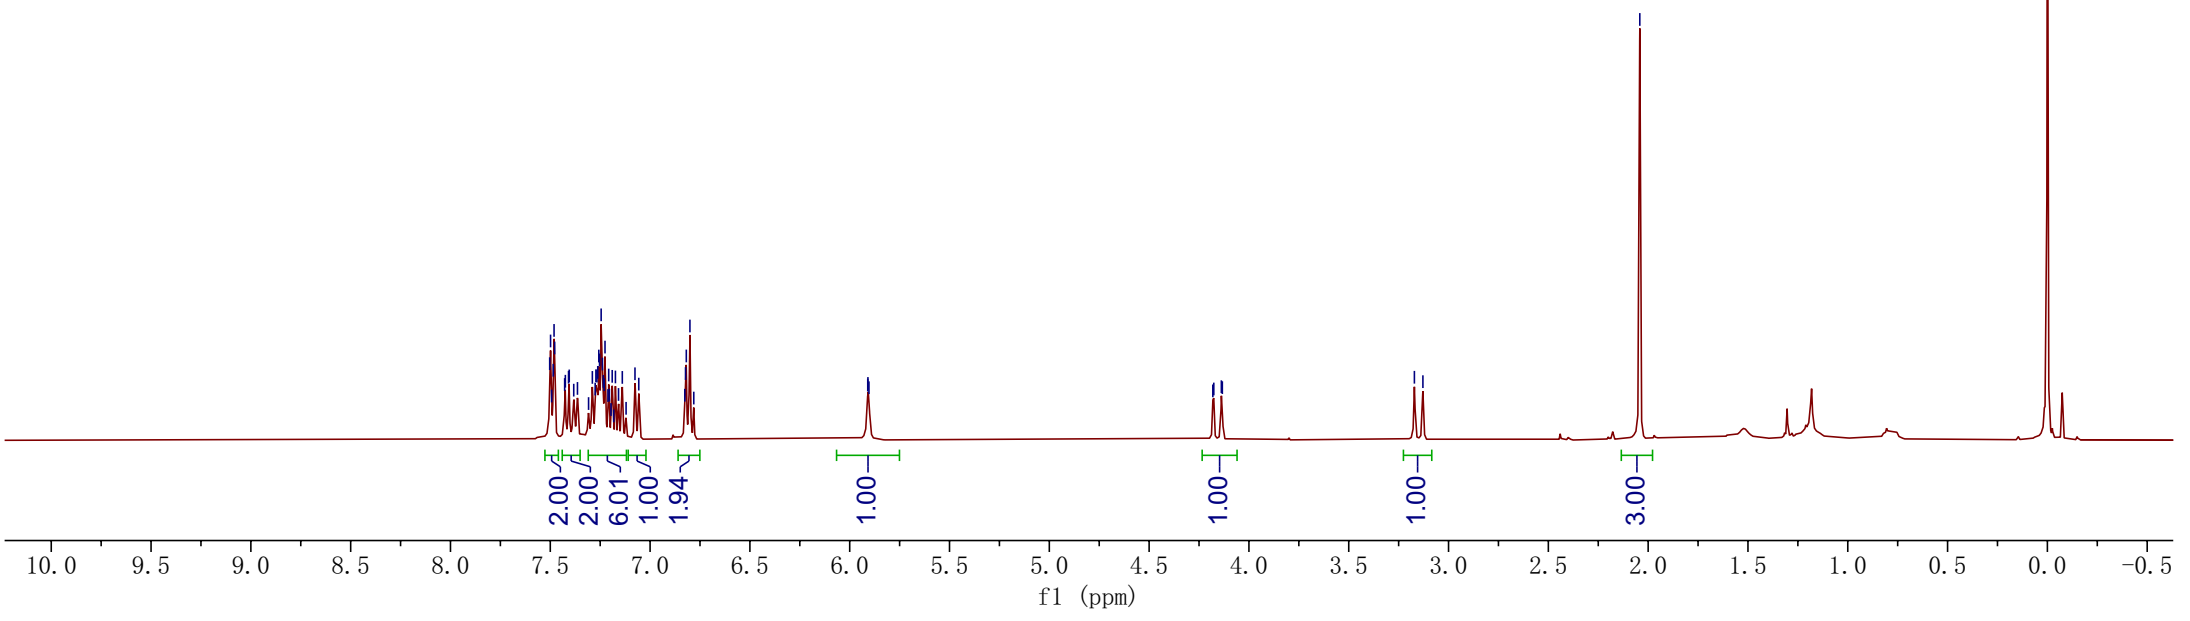



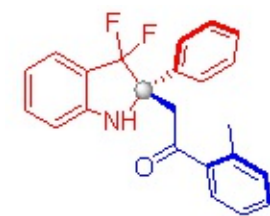

**3ab**  
<sup>19</sup>F NMR (376MHz, CDCl<sub>3</sub>)

-85.24  
-85.90

-106.76  
-107.42

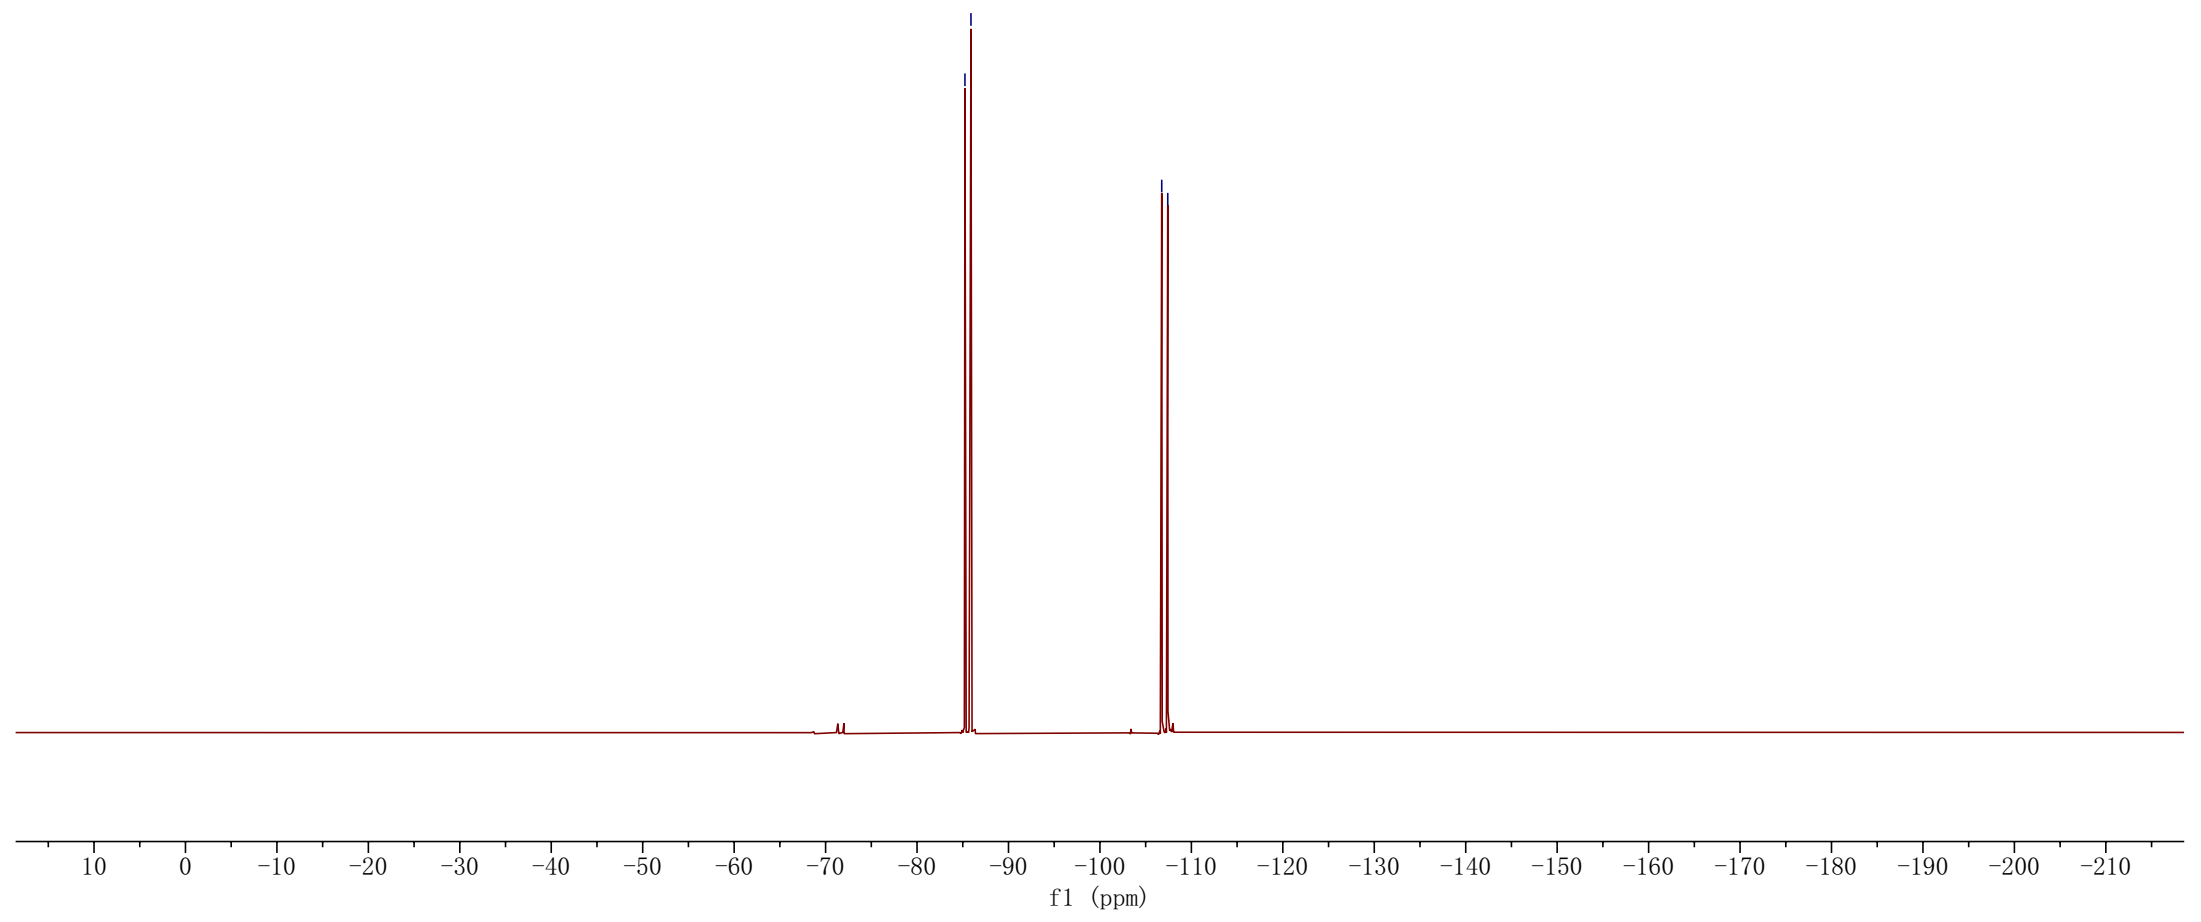

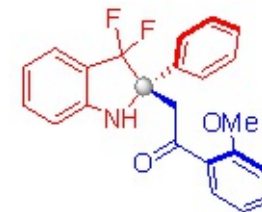

**3ac**  
<sup>1</sup>H NMR (400MHz, CDCl<sub>3</sub>)

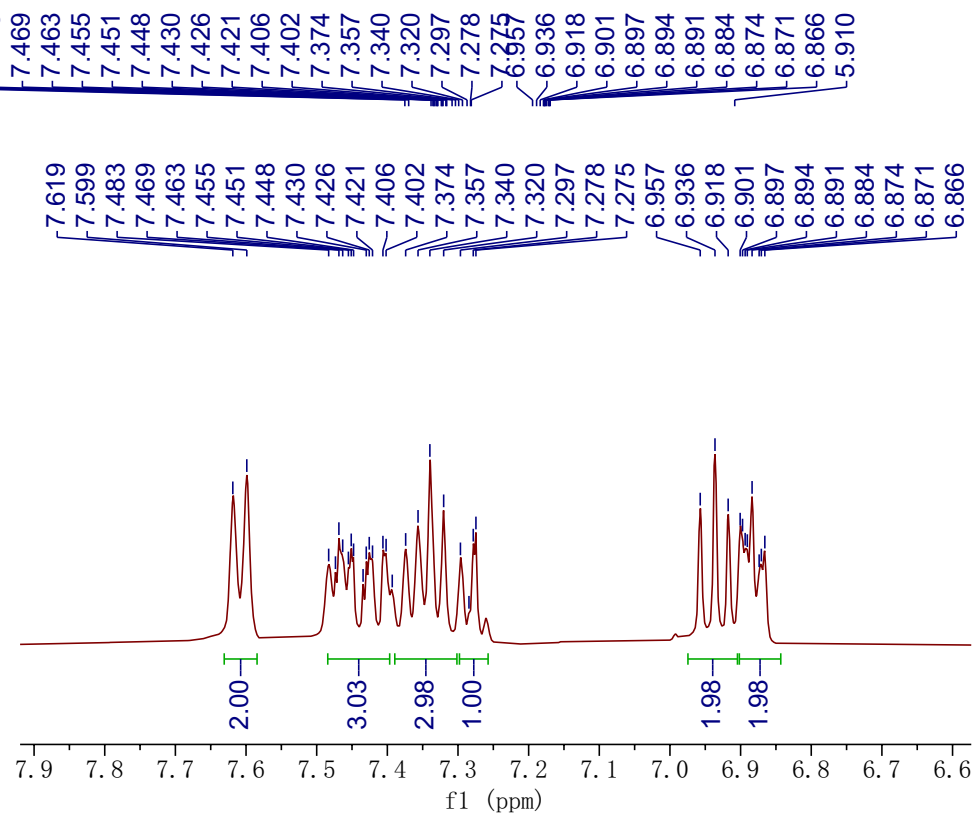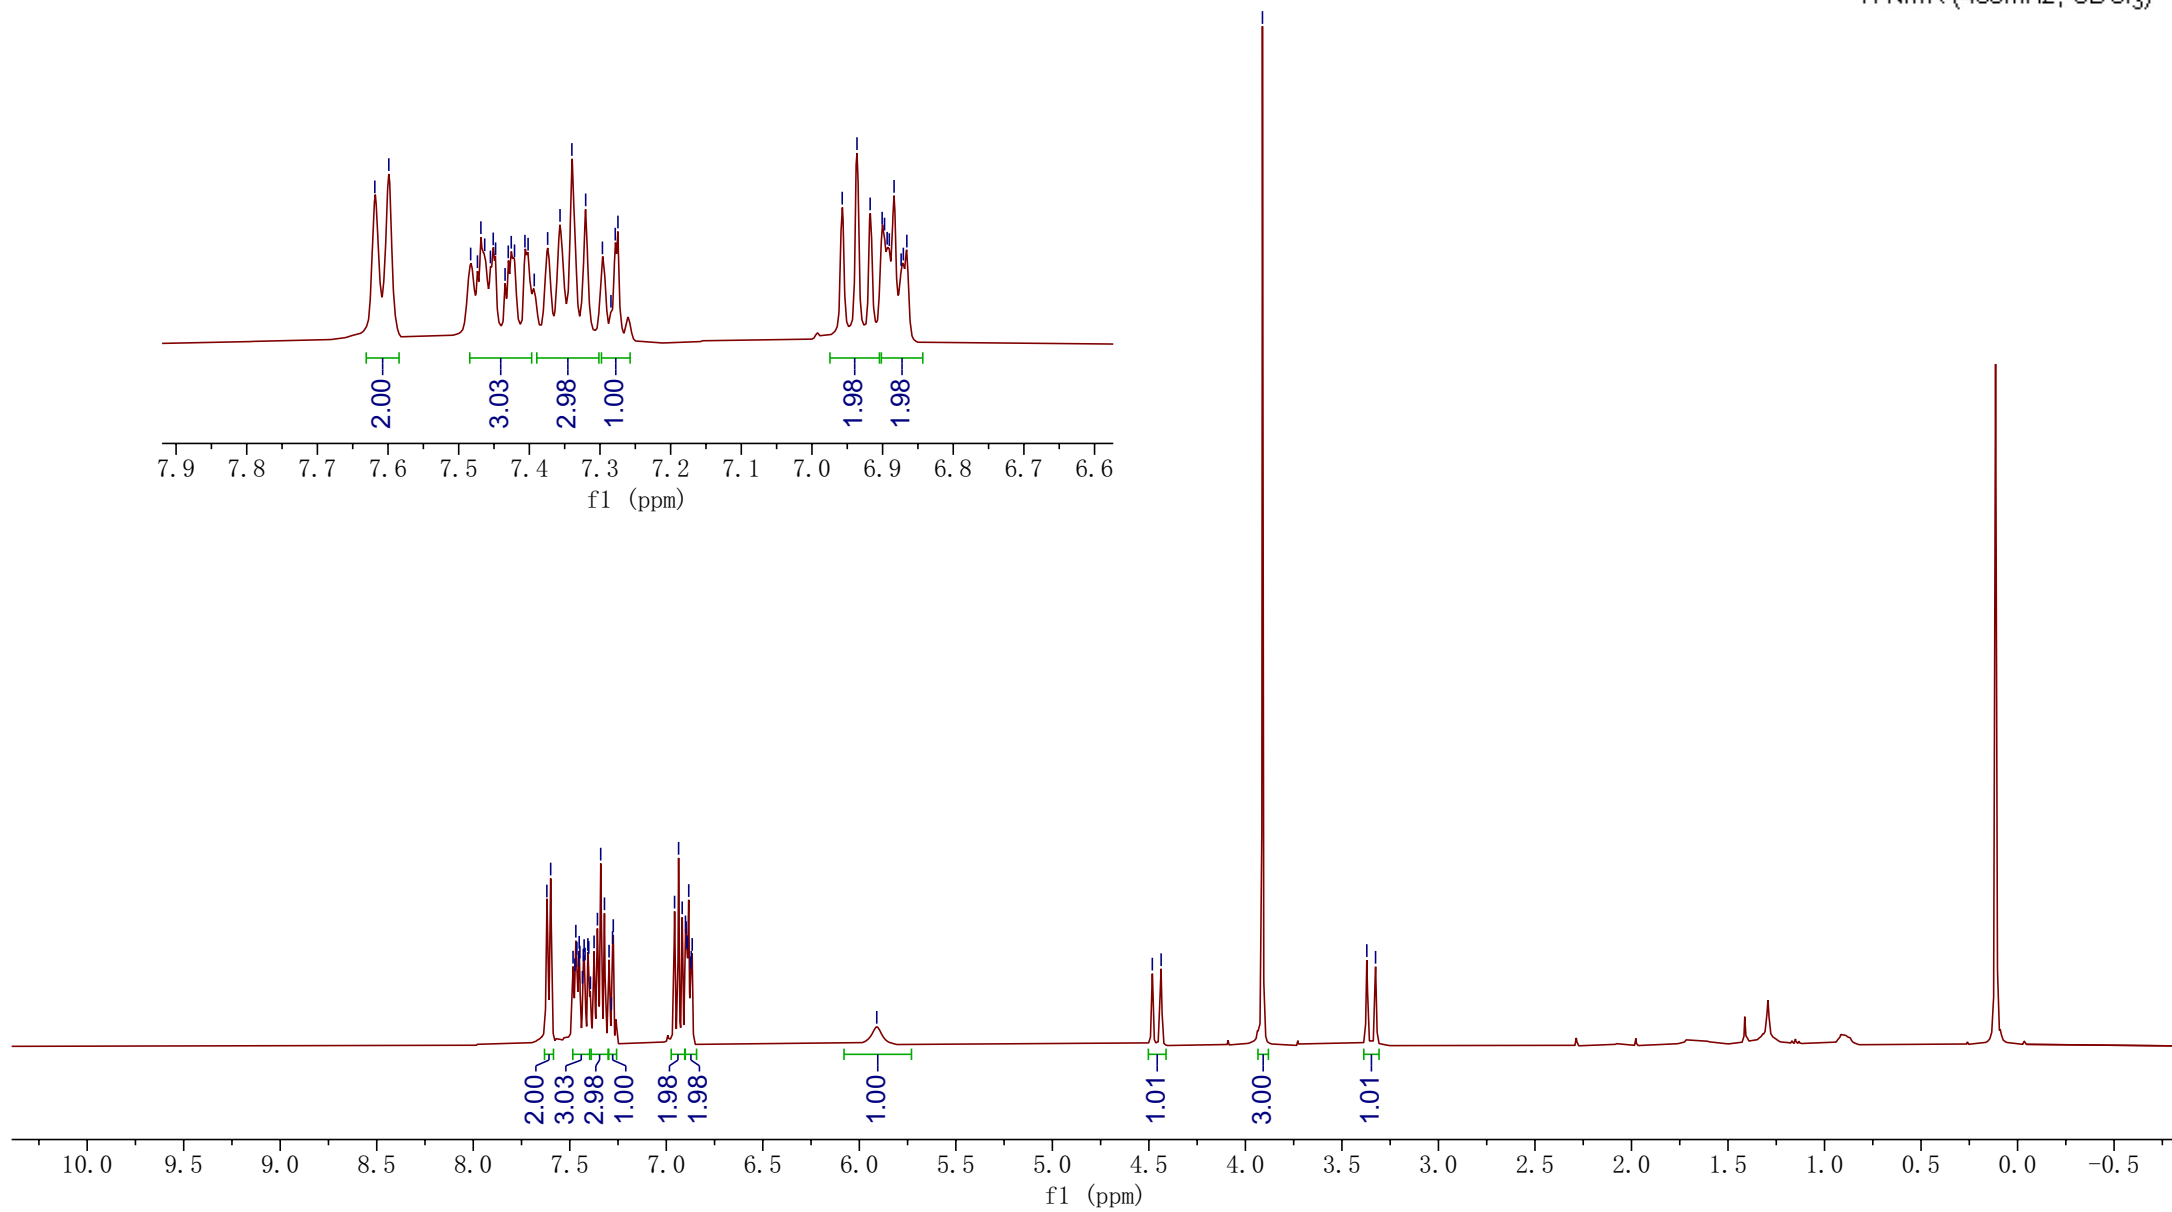



200.71  
200.69

158.55  
149.82  
149.77  
149.74  
149.69  
137.70  
137.65  
134.02  
132.86  
130.02  
129.16  
128.13  
128.02  
127.50  
126.68  
124.28  
124.17  
120.58  
120.47  
120.22  
119.96  
118.99  
111.46  
111.20  
77.32  
77.00  
76.68  
72.34  
72.13  
72.07  
71.86  
55.50  
47.30  
47.28  
47.20  
47.18

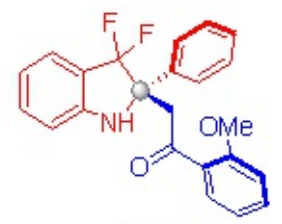

**3ac**  
<sup>13</sup>C NMR (100MHz, CDCl<sub>3</sub>)

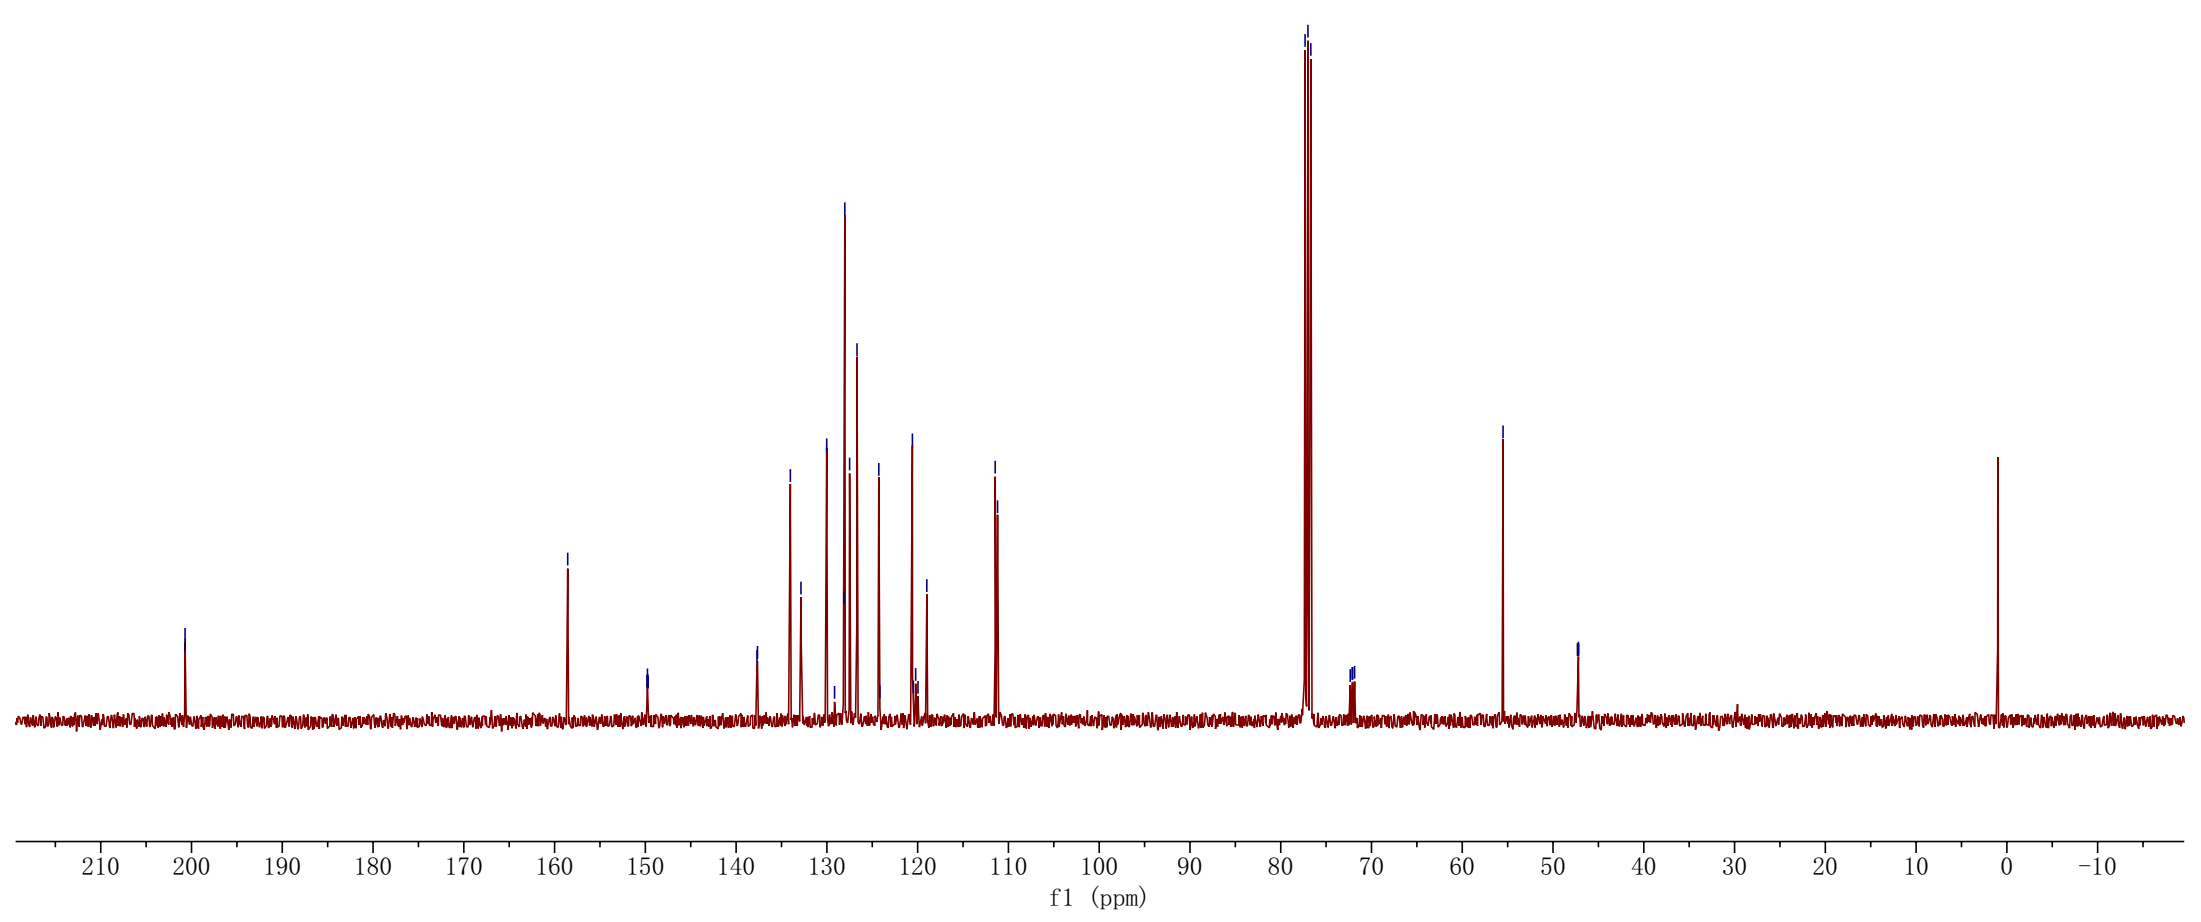

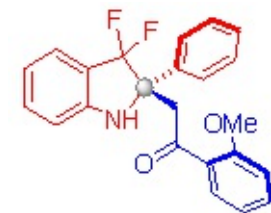

**3ac**  
<sup>19</sup>F NMR (376MHz, CDCl<sub>3</sub>)

--84.56  
--85.22

--107.09  
--107.75

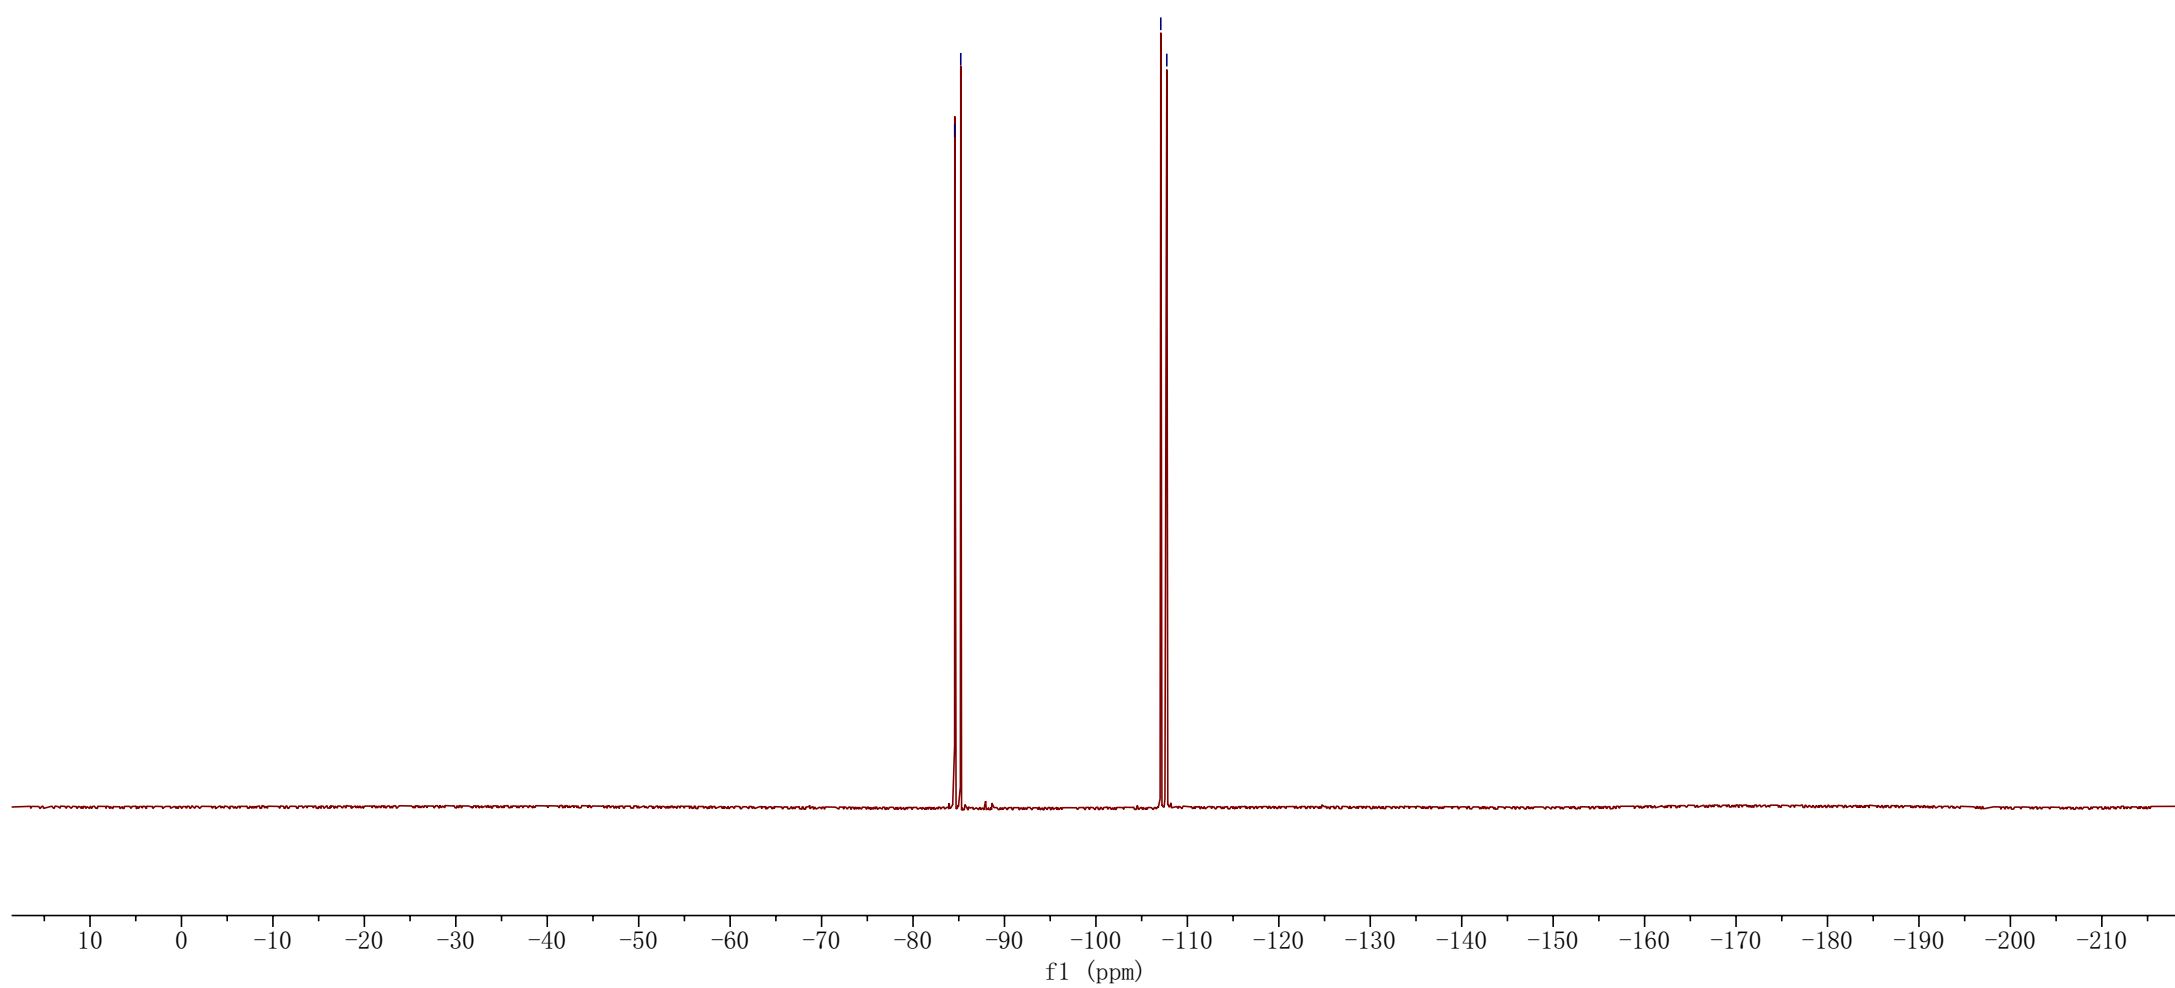

7.527  
7.513  
7.508  
7.494  
7.490  
7.395  
7.392  
7.388  
7.378  
7.374  
7.369  
7.365  
7.361  
7.356  
7.346  
7.341  
7.253  
7.249  
7.236  
7.232  
7.217  
7.191  
7.187  
7.184  
7.170  
7.147  
7.055  
7.052  
7.036  
7.033  
7.013  
7.005  
7.003  
6.985  
6.982  
6.788  
6.769  
6.760  
6.750  
6.740  
6.645  
4.294  
3.328  
3.282

7.513  
7.508  
7.494  
7.490  
7.395  
7.374  
7.369  
7.365  
7.361  
7.356  
7.346  
7.341  
7.253  
7.249  
7.236  
7.232  
7.217  
7.191  
7.187  
7.170  
7.055  
7.052  
7.036  
7.033  
7.013  
7.005  
7.003  
6.985  
6.788  
6.769  
6.760  
6.750  
6.740

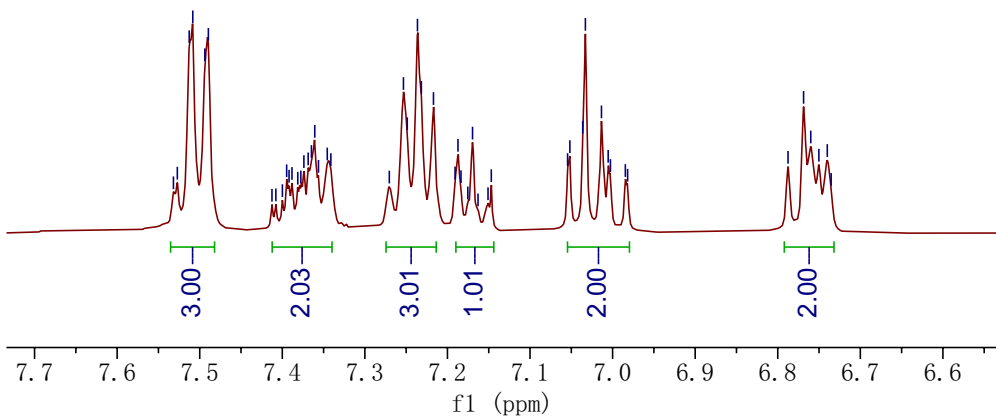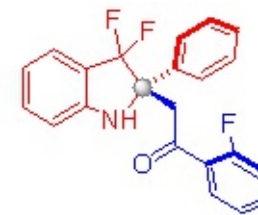

**3ad**  
<sup>1</sup>H NMR (400MHz, CDCl<sub>3</sub>)

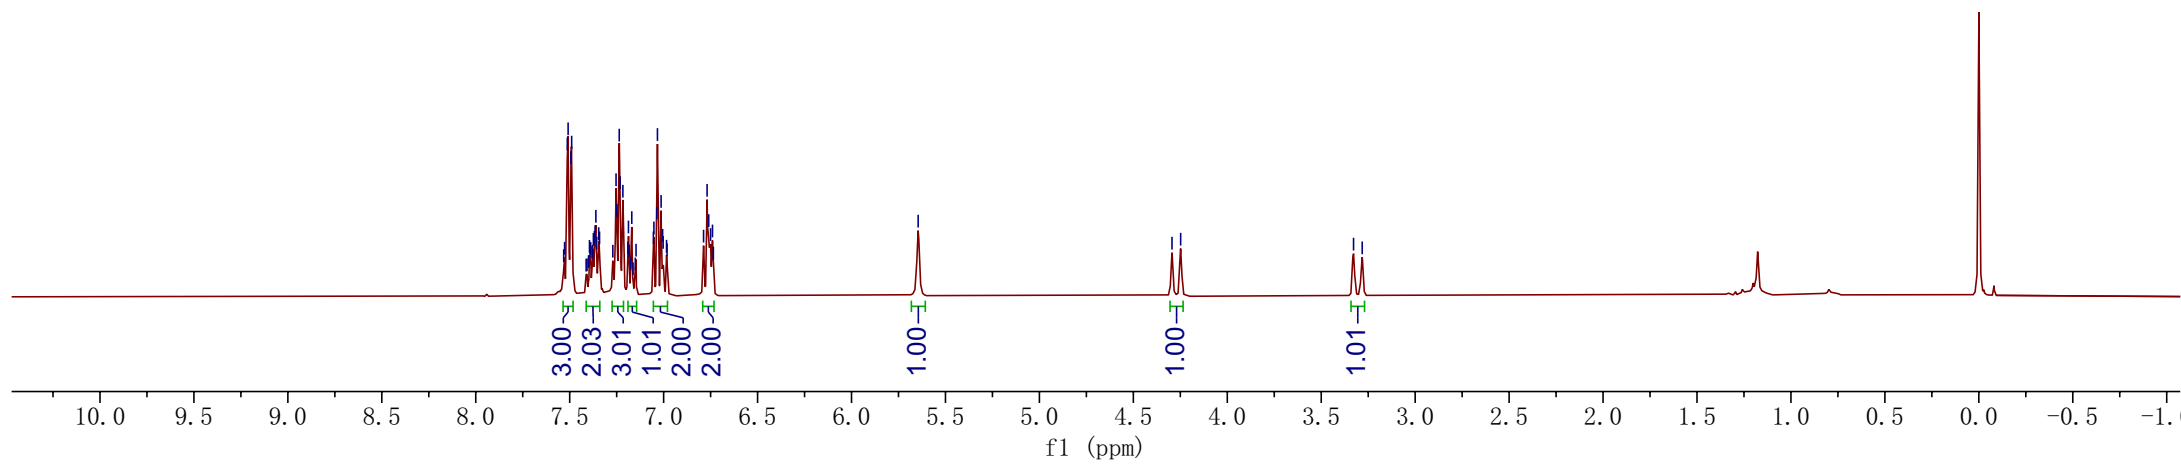

196.85  
196.84  
196.82  
196.80

163.03  
160.50  
149.64  
149.58  
149.56  
149.50  
137.50  
137.44  
135.15  
135.06  
132.96  
130.31  
130.28  
128.99  
128.20  
127.67  
126.53  
126.51  
125.74  
125.62  
124.47  
124.44  
124.37  
124.00  
120.34  
120.09  
120.08  
119.83  
119.24  
116.84  
116.61  
111.10  
77.32  
77.00  
76.68  
72.09  
71.88  
71.81  
71.60  
47.23  
47.21  
47.15  
47.13  
47.11  
47.05  
47.03

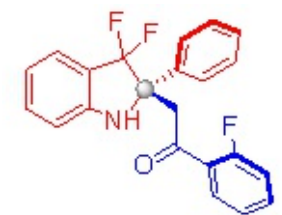

**3ad**  
<sup>13</sup>C NMR (100MHz, CDCl<sub>3</sub>)

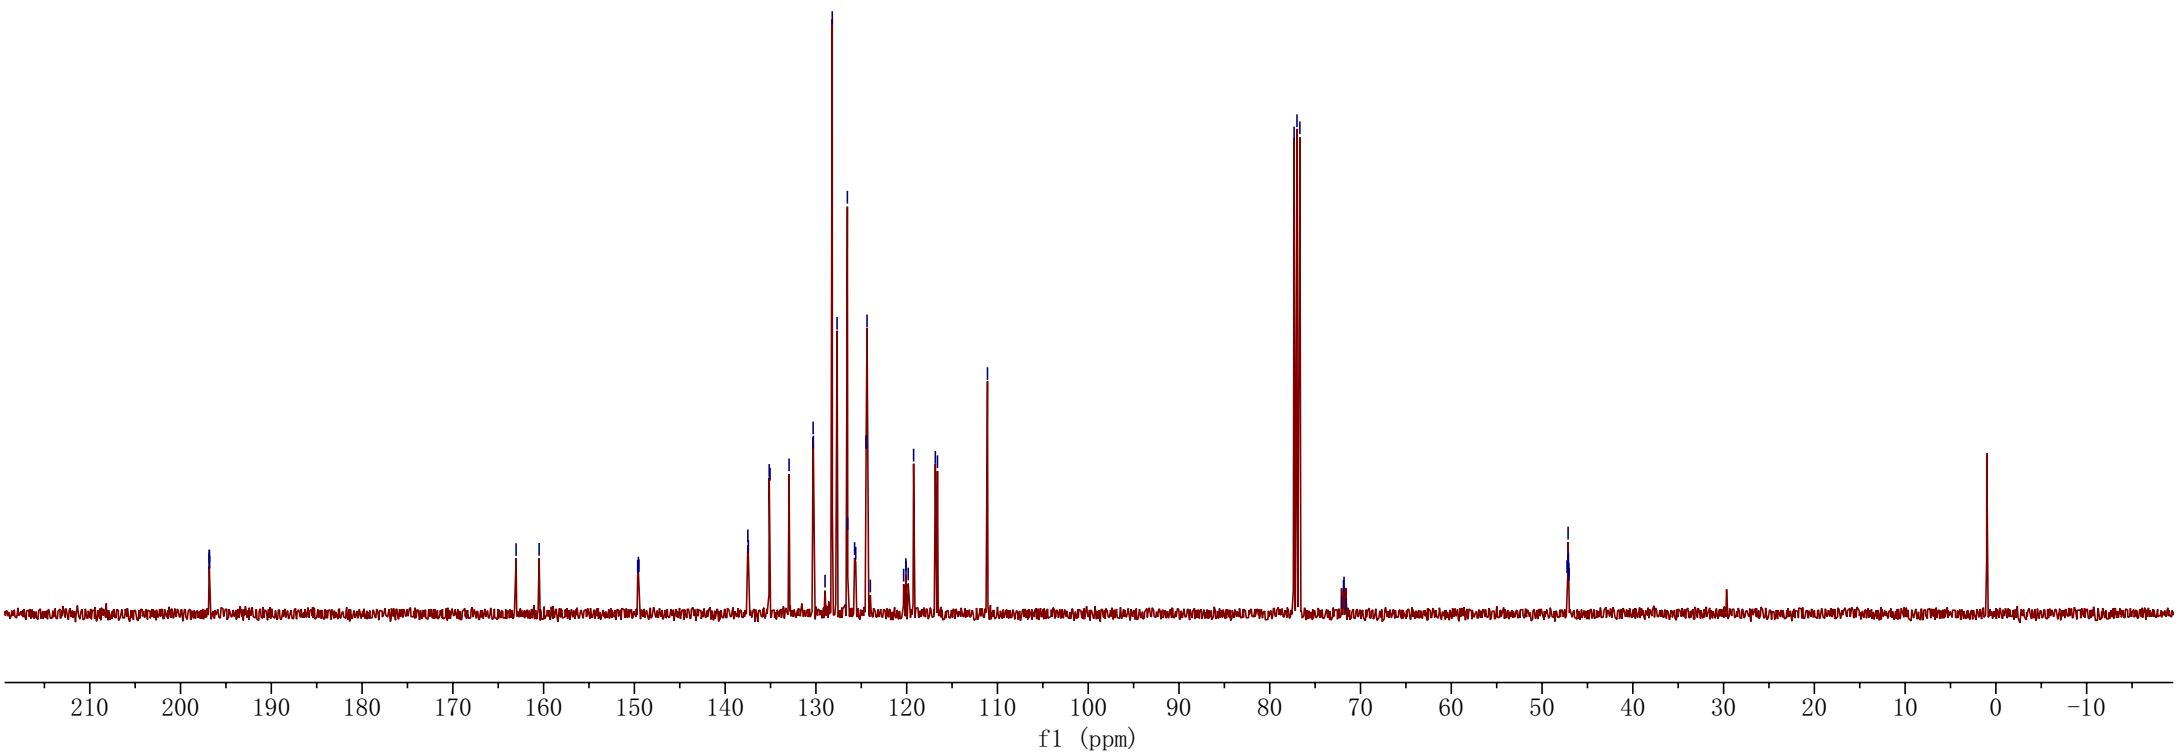

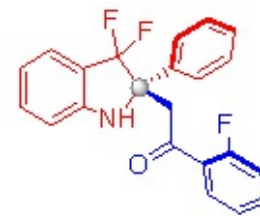

**3ad**

$^{19}\text{F}$  NMR (376MHz,  $\text{CDCl}_3$ )

-85.30  
-85.31  
-85.96  
-85.97

-106.53  
-107.19  
-108.51

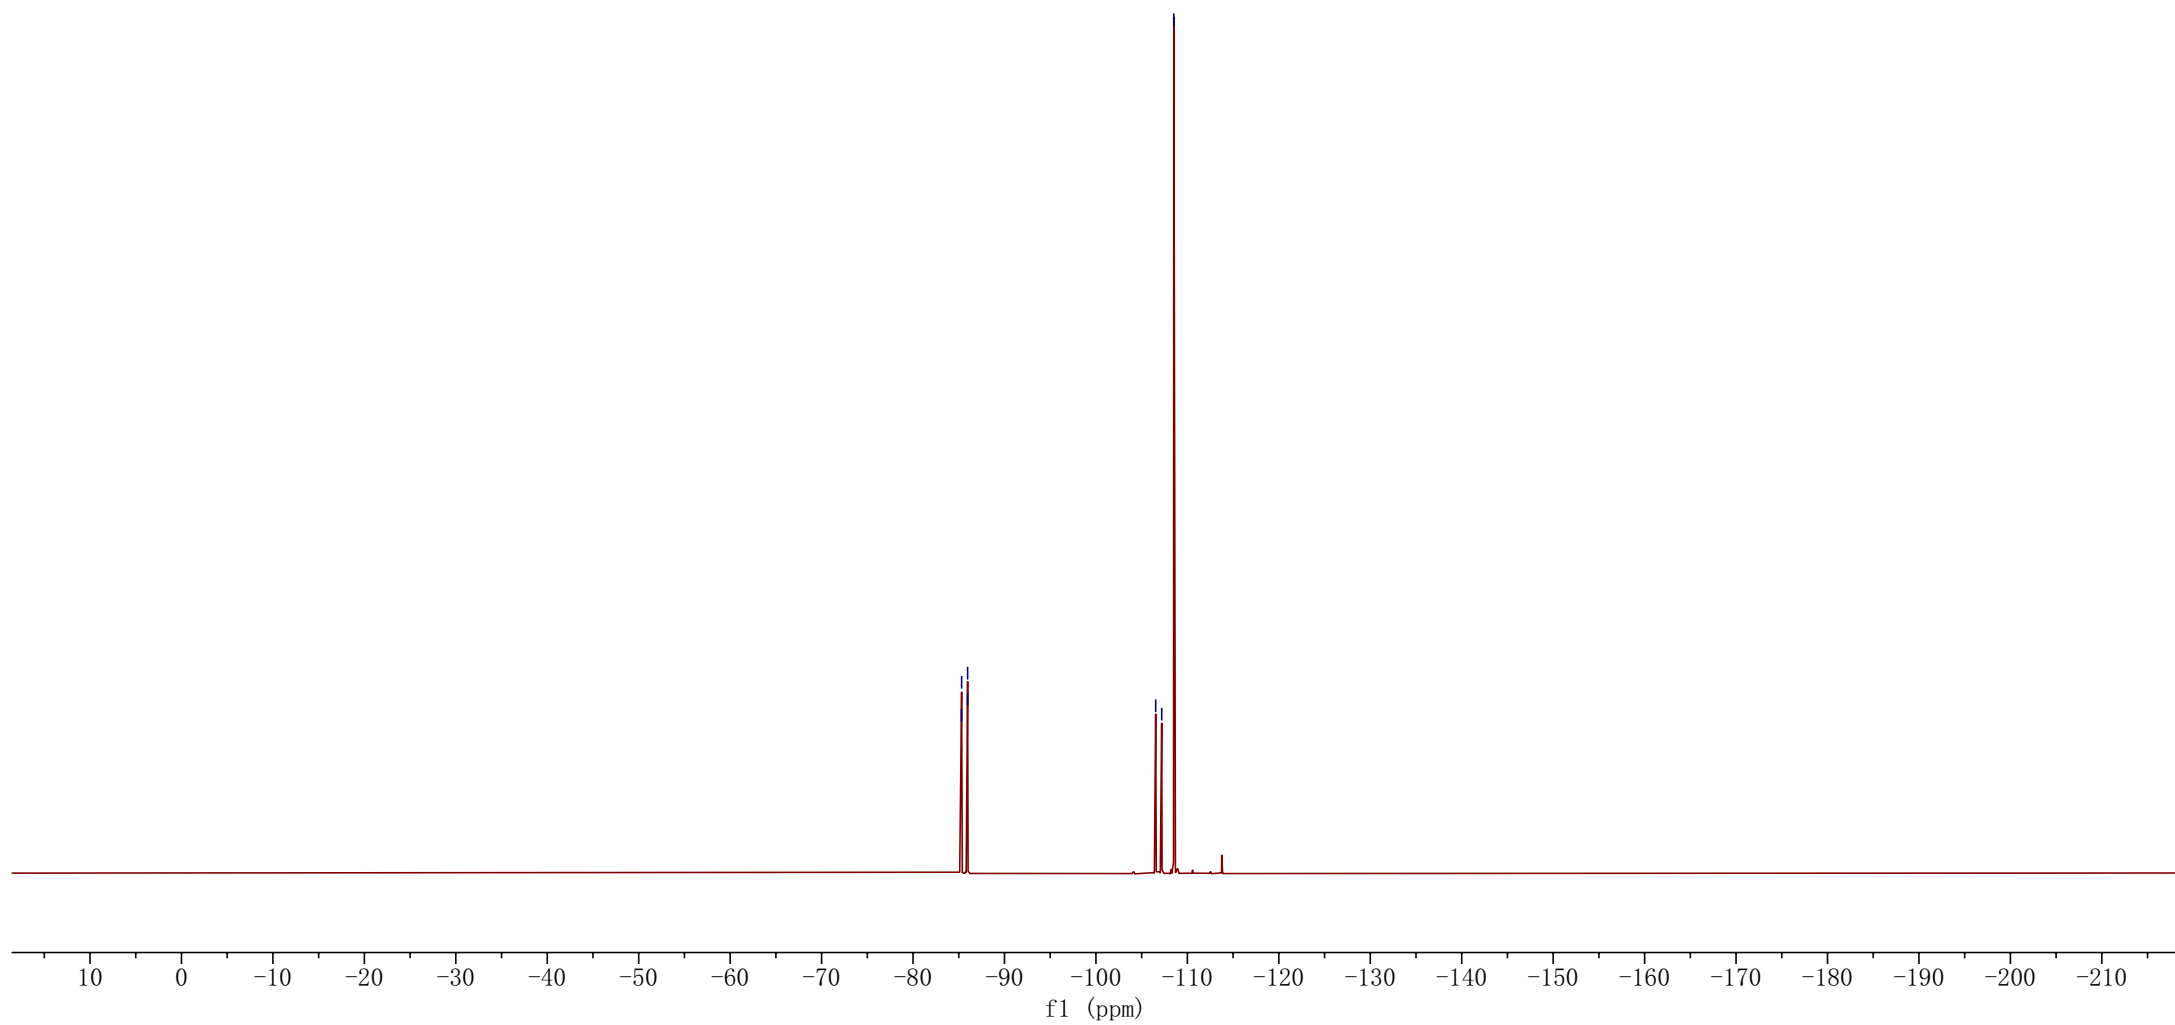

7.479  
7.474  
7.462  
7.458  
7.455  
7.370  
7.351  
7.288  
7.268  
7.265  
7.259  
7.252  
7.245  
7.240  
7.229  
7.224  
7.216  
7.211  
7.205  
7.202  
7.198  
7.185  
7.079  
6.878  
6.861  
6.857  
6.833  
6.815  
6.798  
6.771  
5.765

4.200  
4.195  
4.158  
4.153

3.216  
3.174

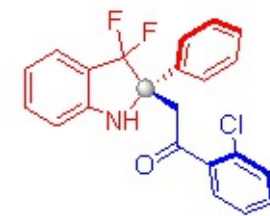

**3ae**  
<sup>1</sup>H NMR (400MHz, CDCl<sub>3</sub>)

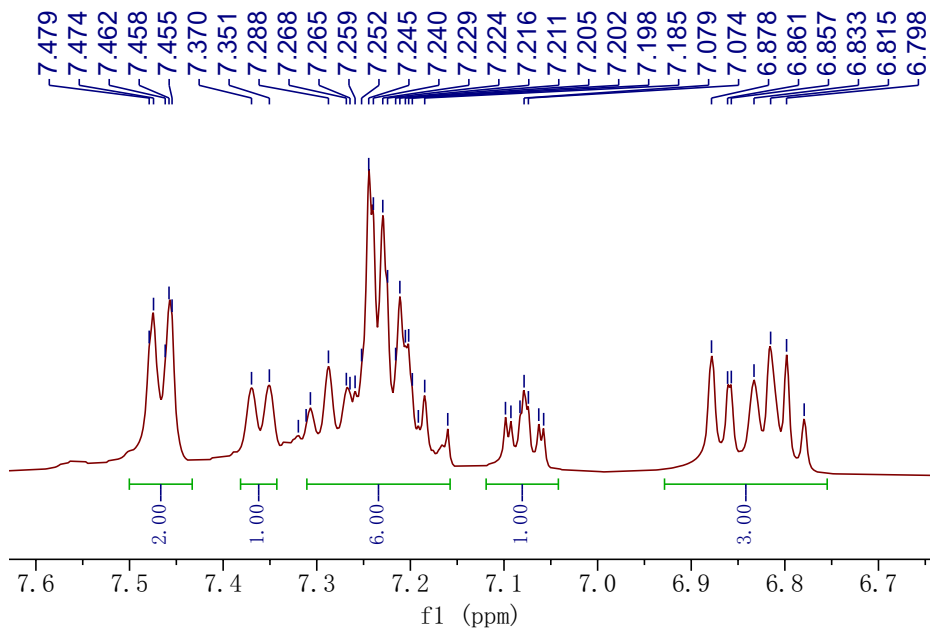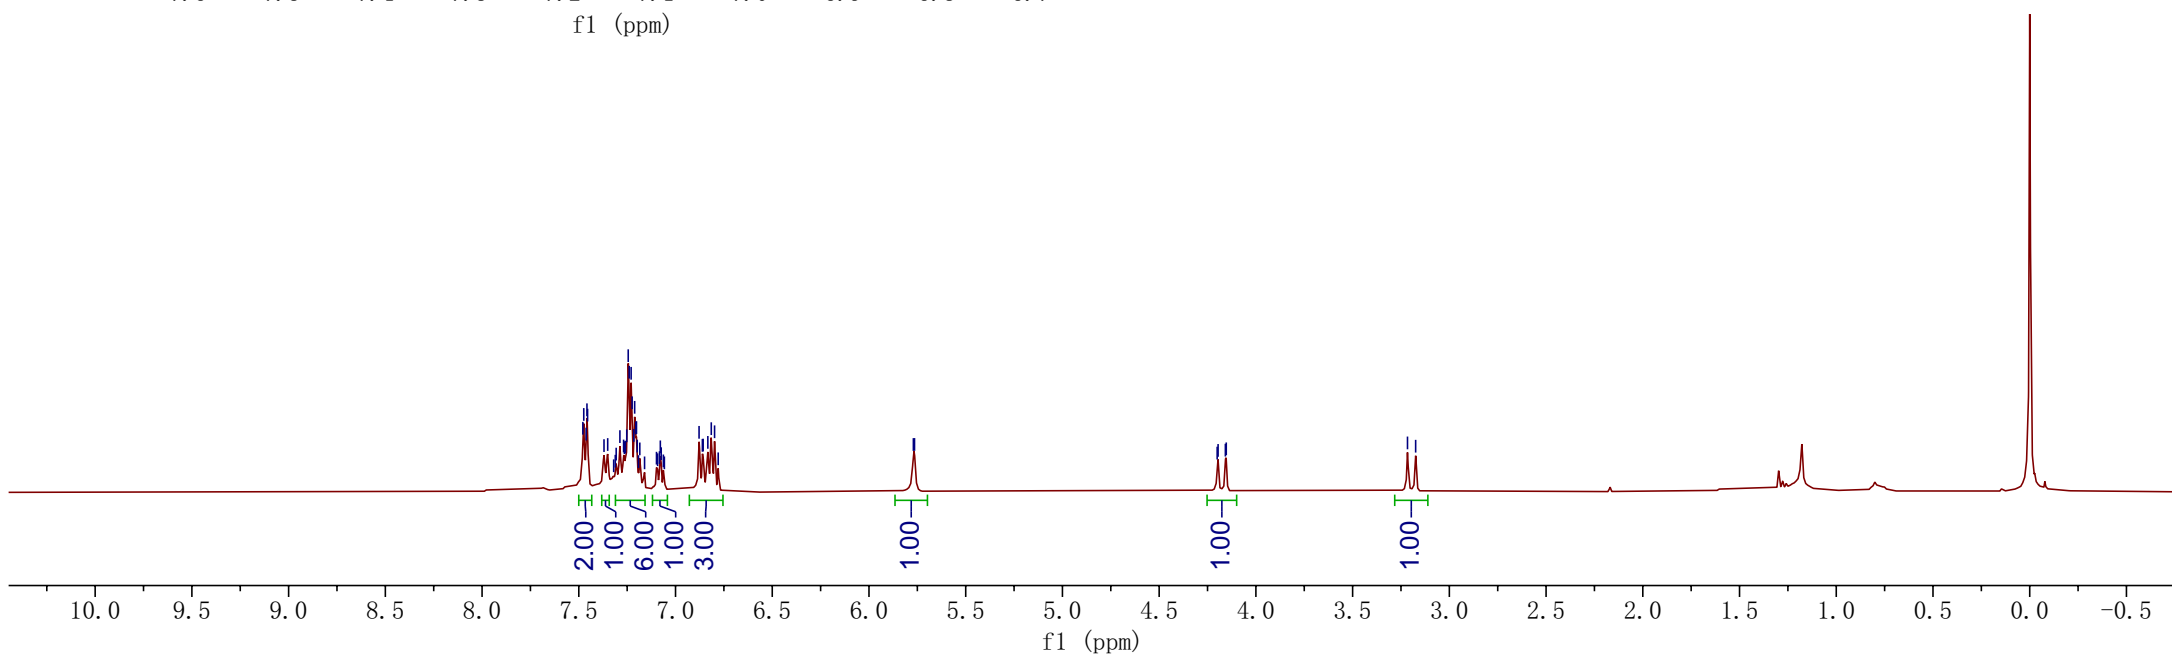

202.32  
149.44  
149.38  
149.36  
149.30  
139.43  
136.91  
136.85  
133.05  
132.01  
130.61  
130.36  
128.88  
128.60  
128.22  
127.85  
126.83  
126.72  
126.38  
124.31  
123.88  
120.44  
120.20  
120.18  
119.94  
119.46  
111.51

77.32  
77.00  
76.68  
72.49  
72.27  
72.21  
71.99

46.92  
46.89  
46.82  
46.79

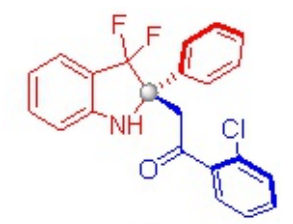

**3ae**  
<sup>13</sup>C NMR (100MHz, CDCl<sub>3</sub>)

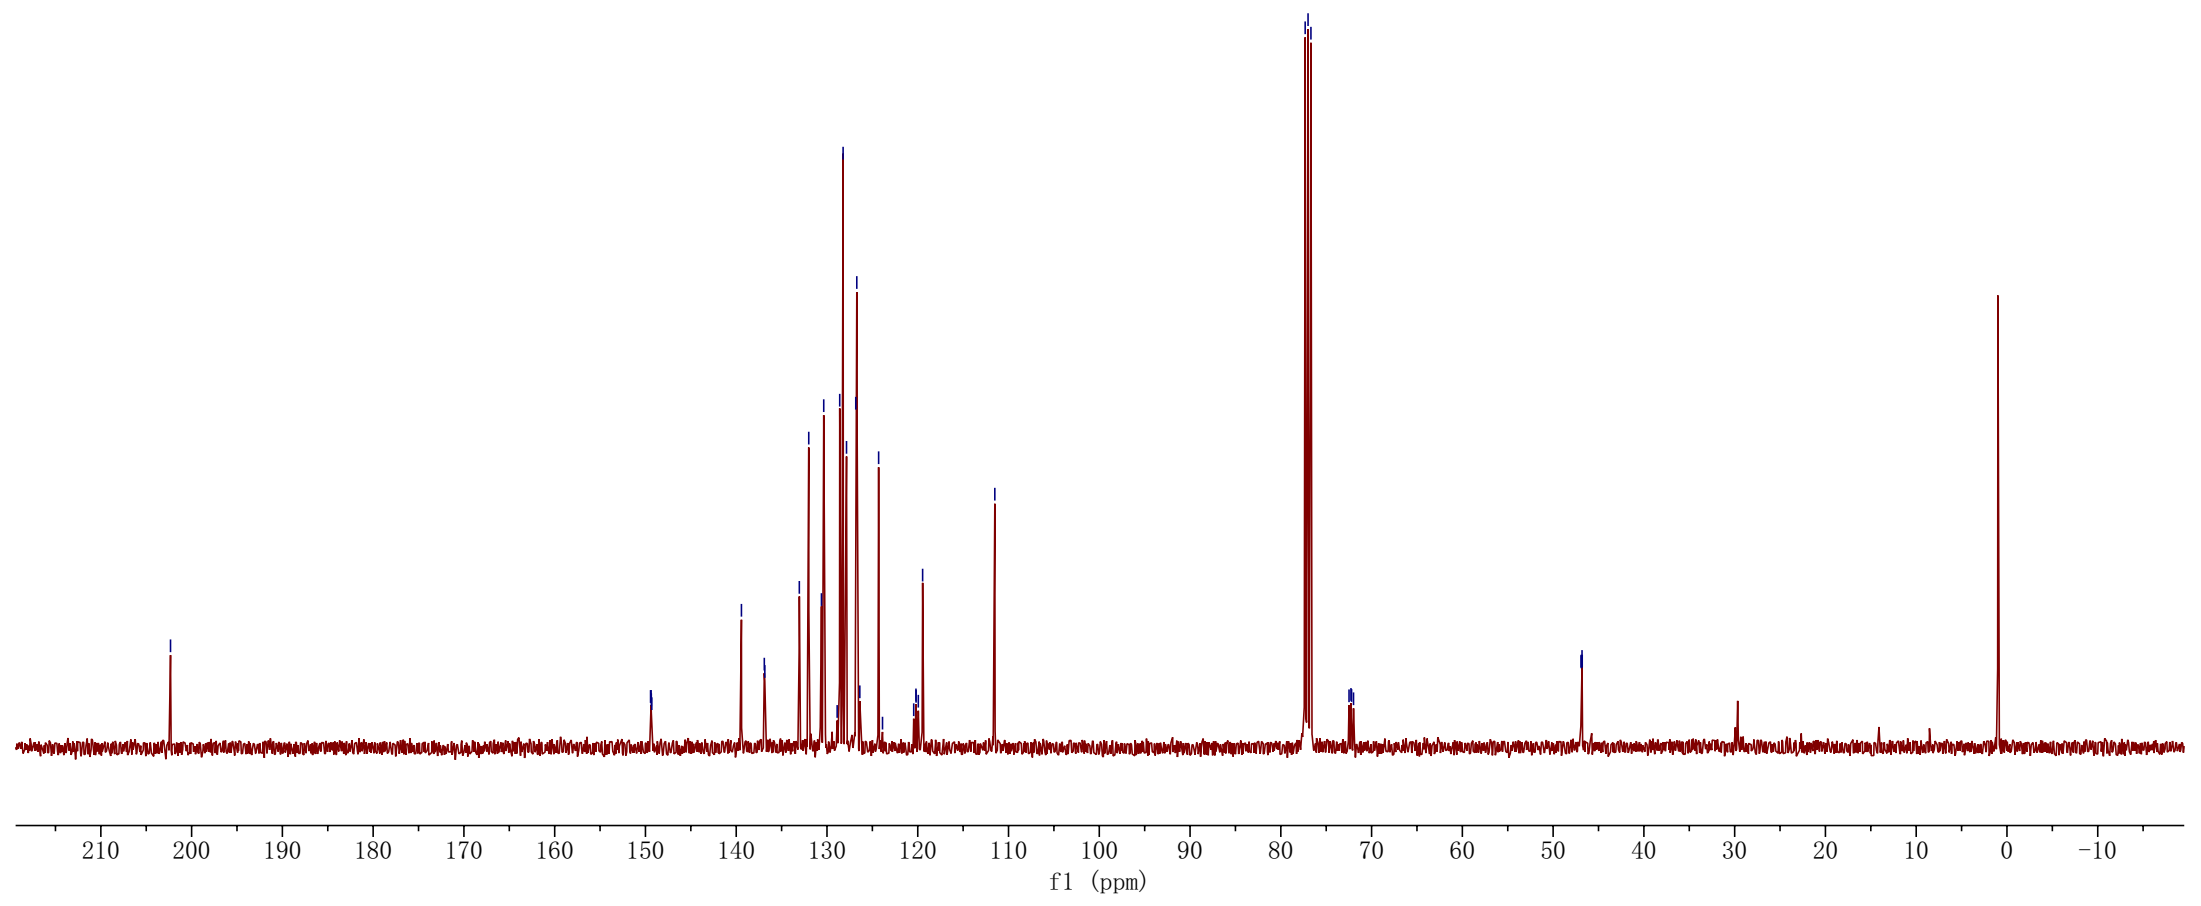

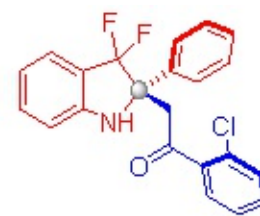

**3ae**  
<sup>19</sup>F NMR (376MHz, CDCl<sub>3</sub>)

-84.86  
-85.52

-106.62  
-107.28

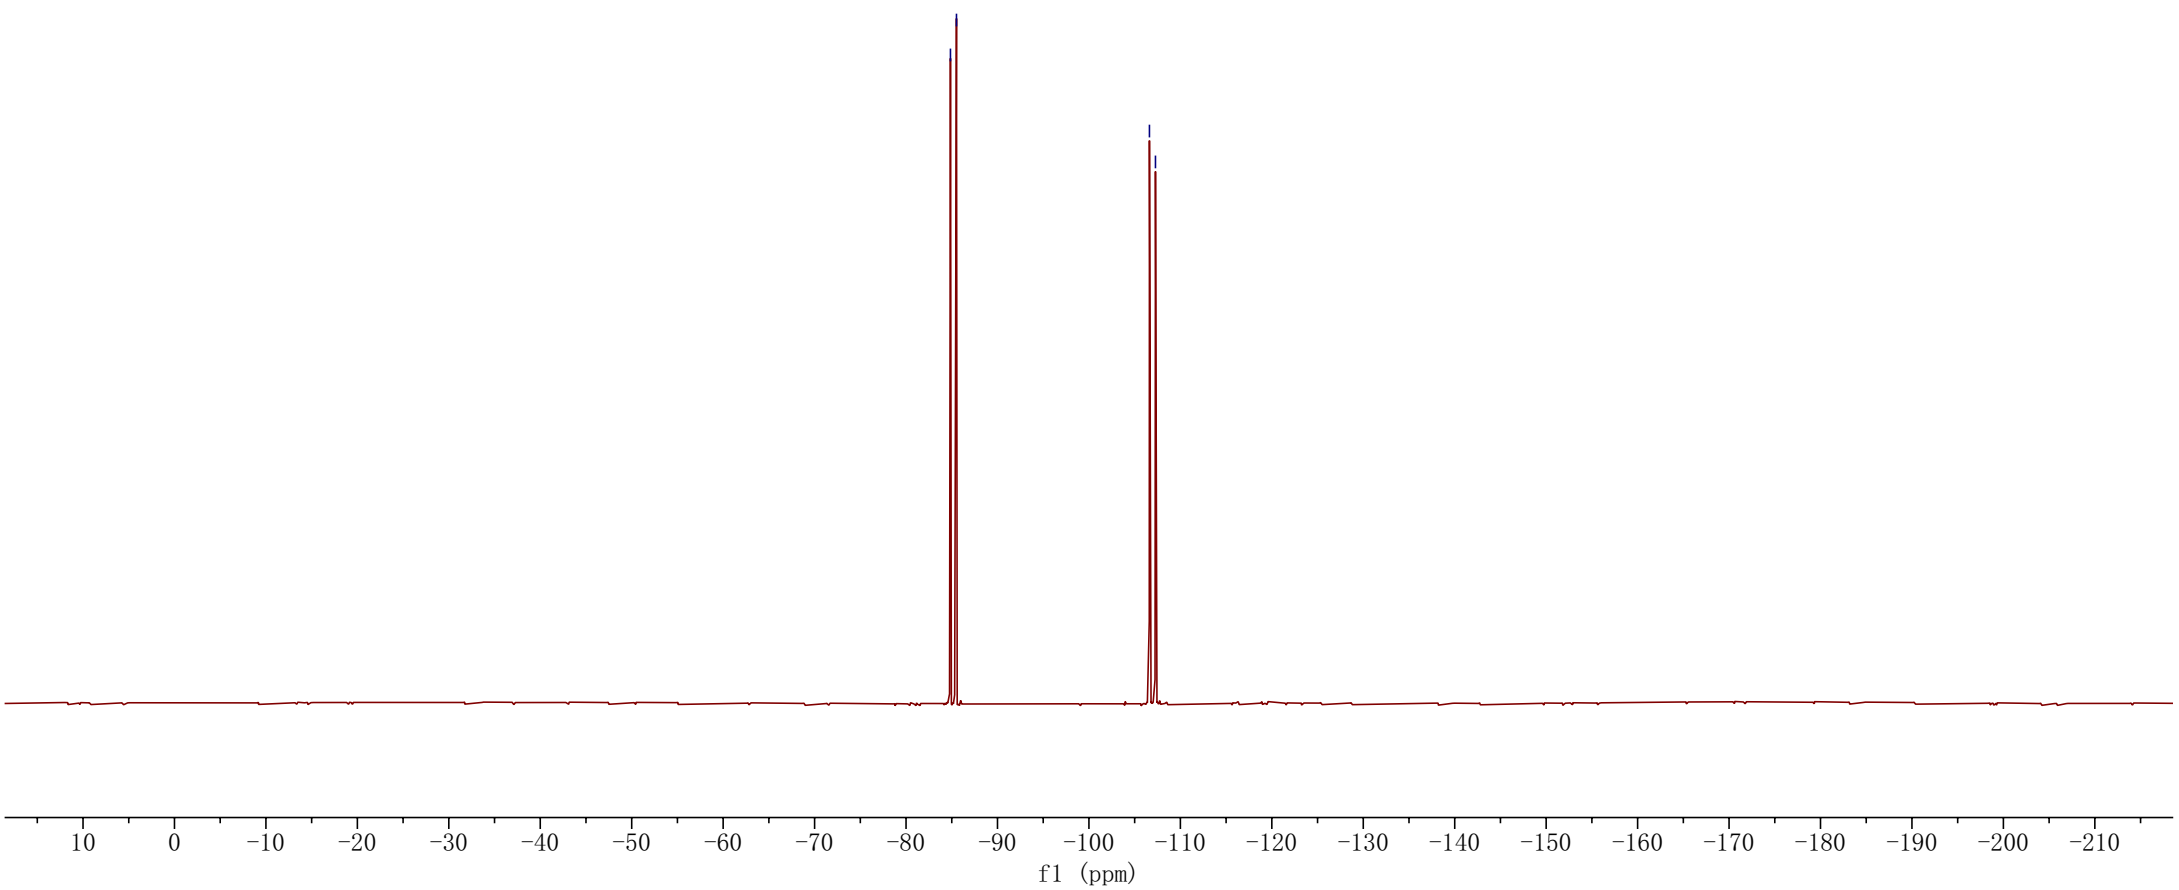



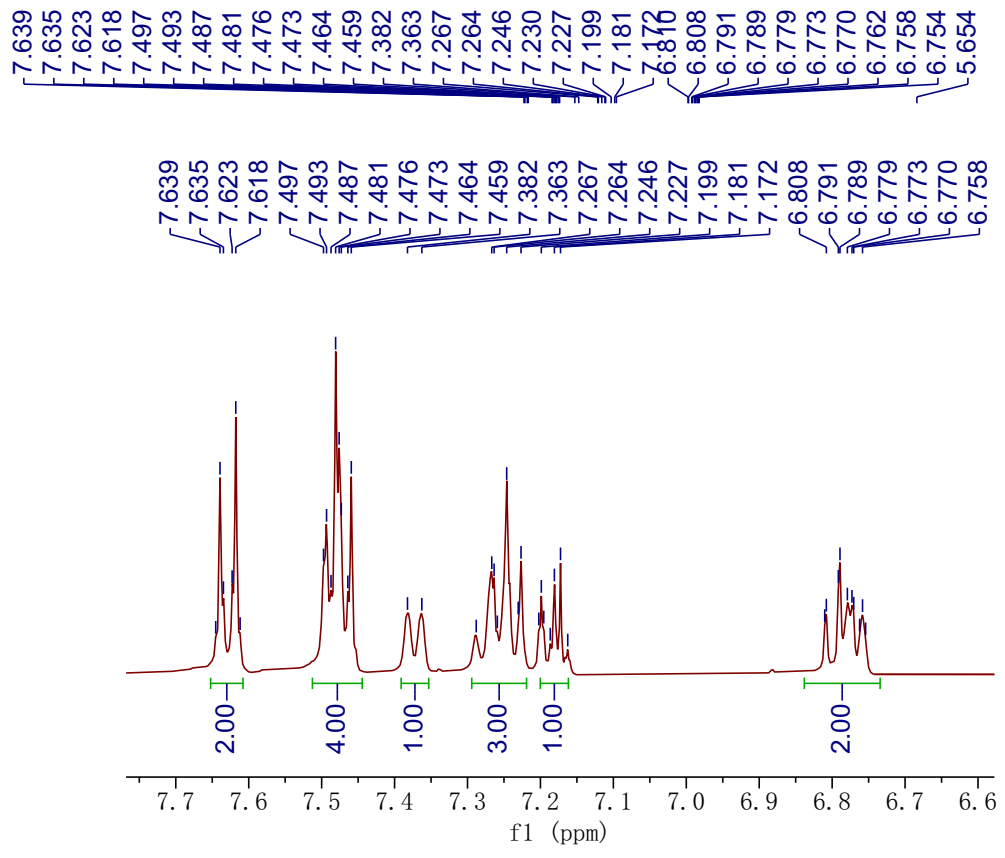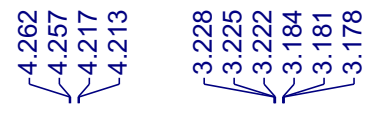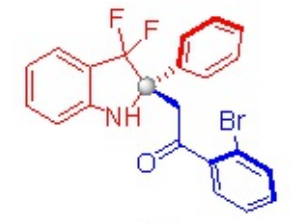

**3af**  
<sup>1</sup>H NMR (400MHz, CDCl<sub>3</sub>)

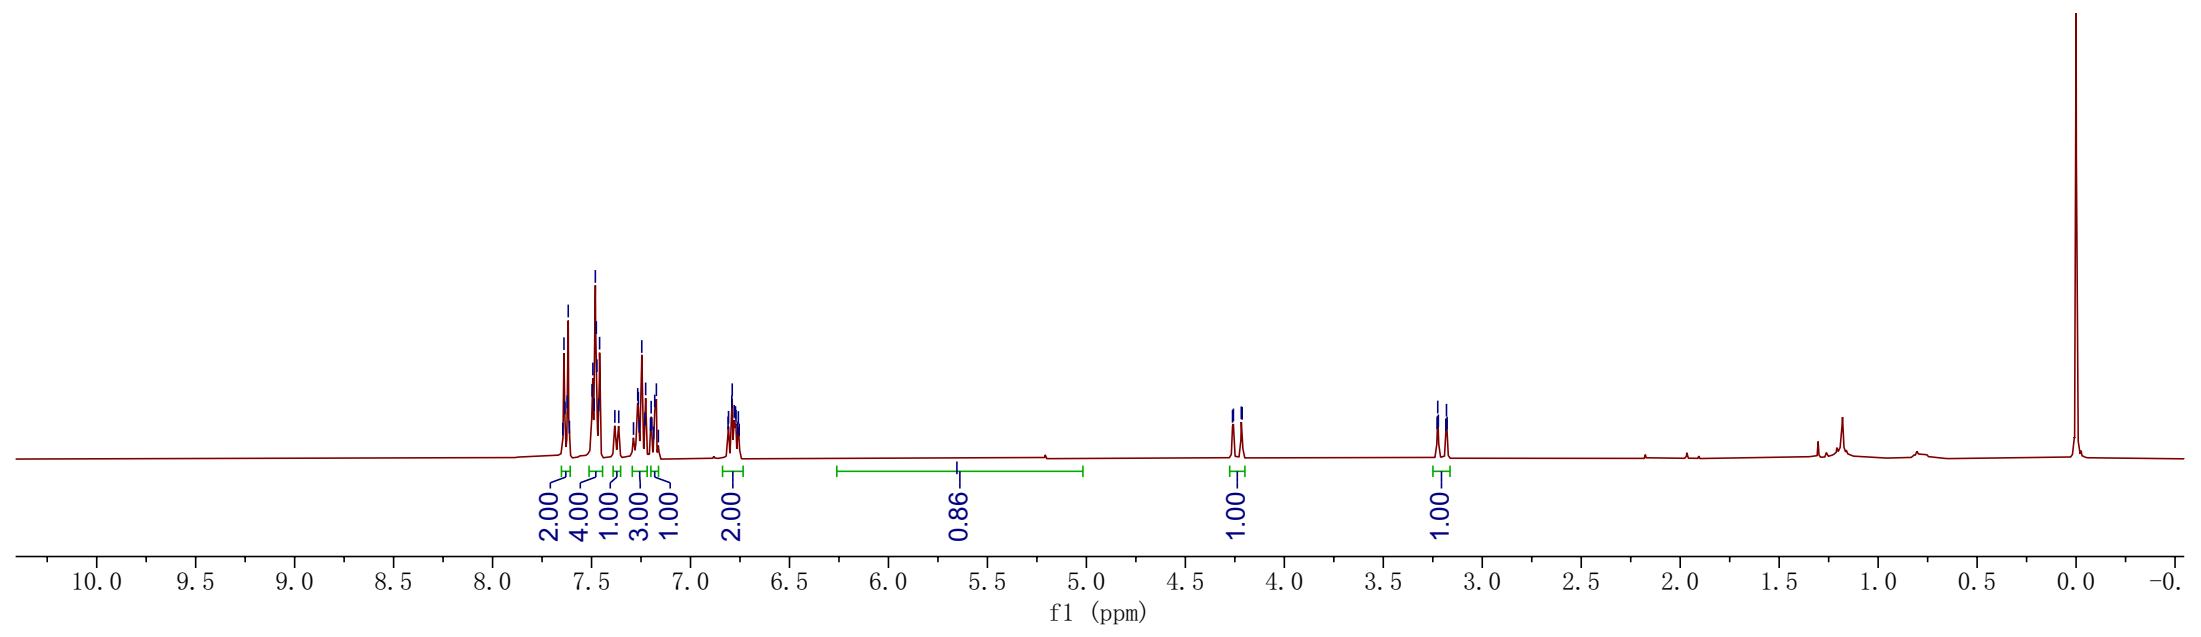

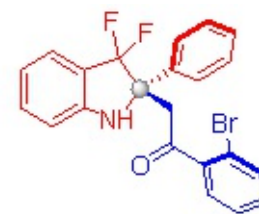

**3af**

<sup>13</sup>C NMR (100MHz, CDCl<sub>3</sub>)

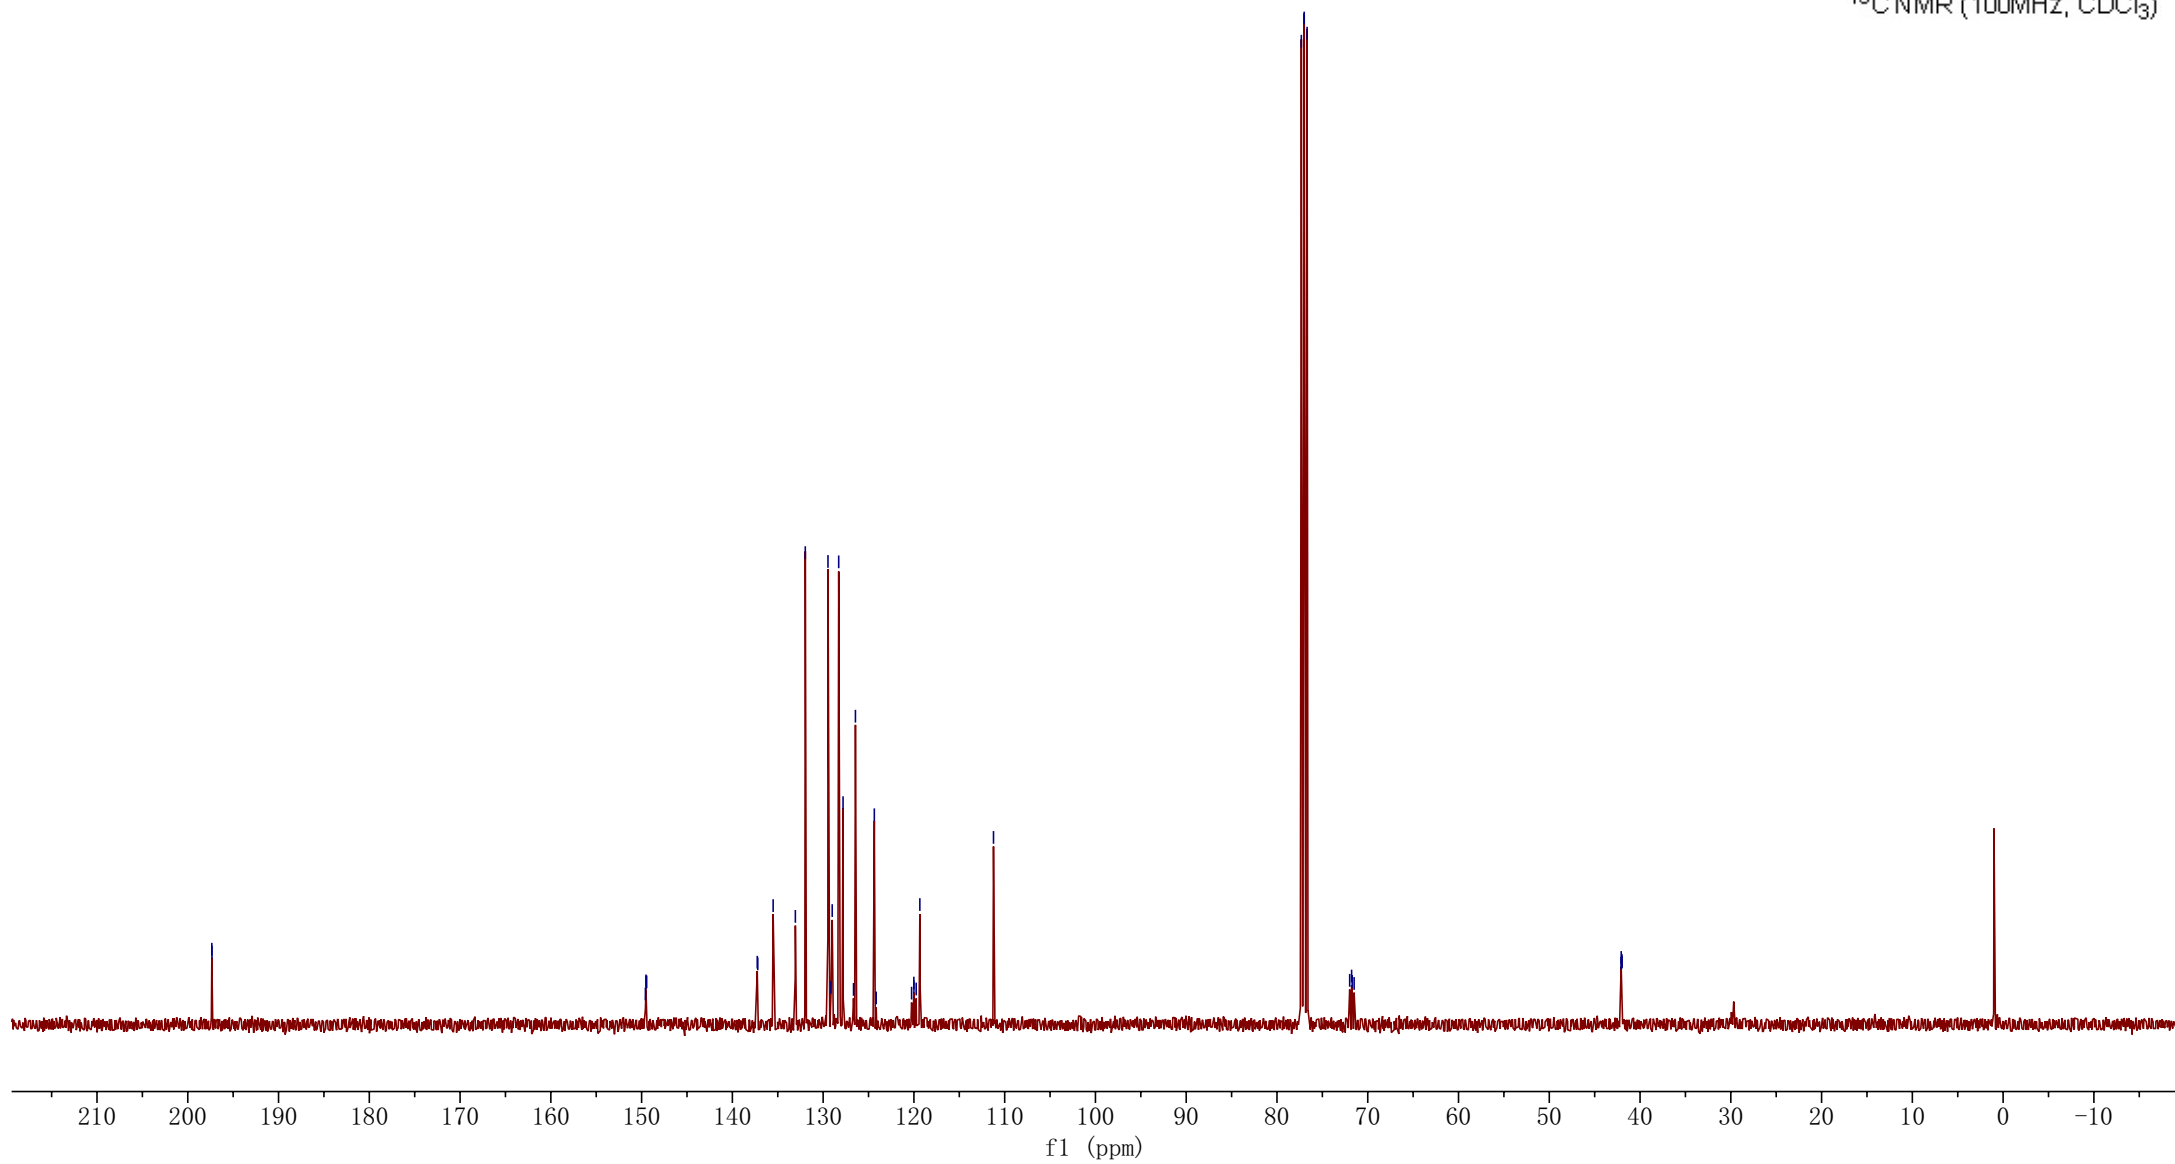

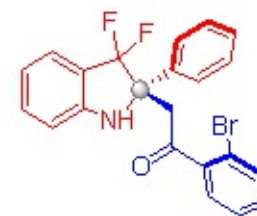

**3af**

$^{19}\text{F}$  NMR (376MHz,  $\text{CDCl}_3$ )

-85.19  
-85.85

-106.59  
-107.25

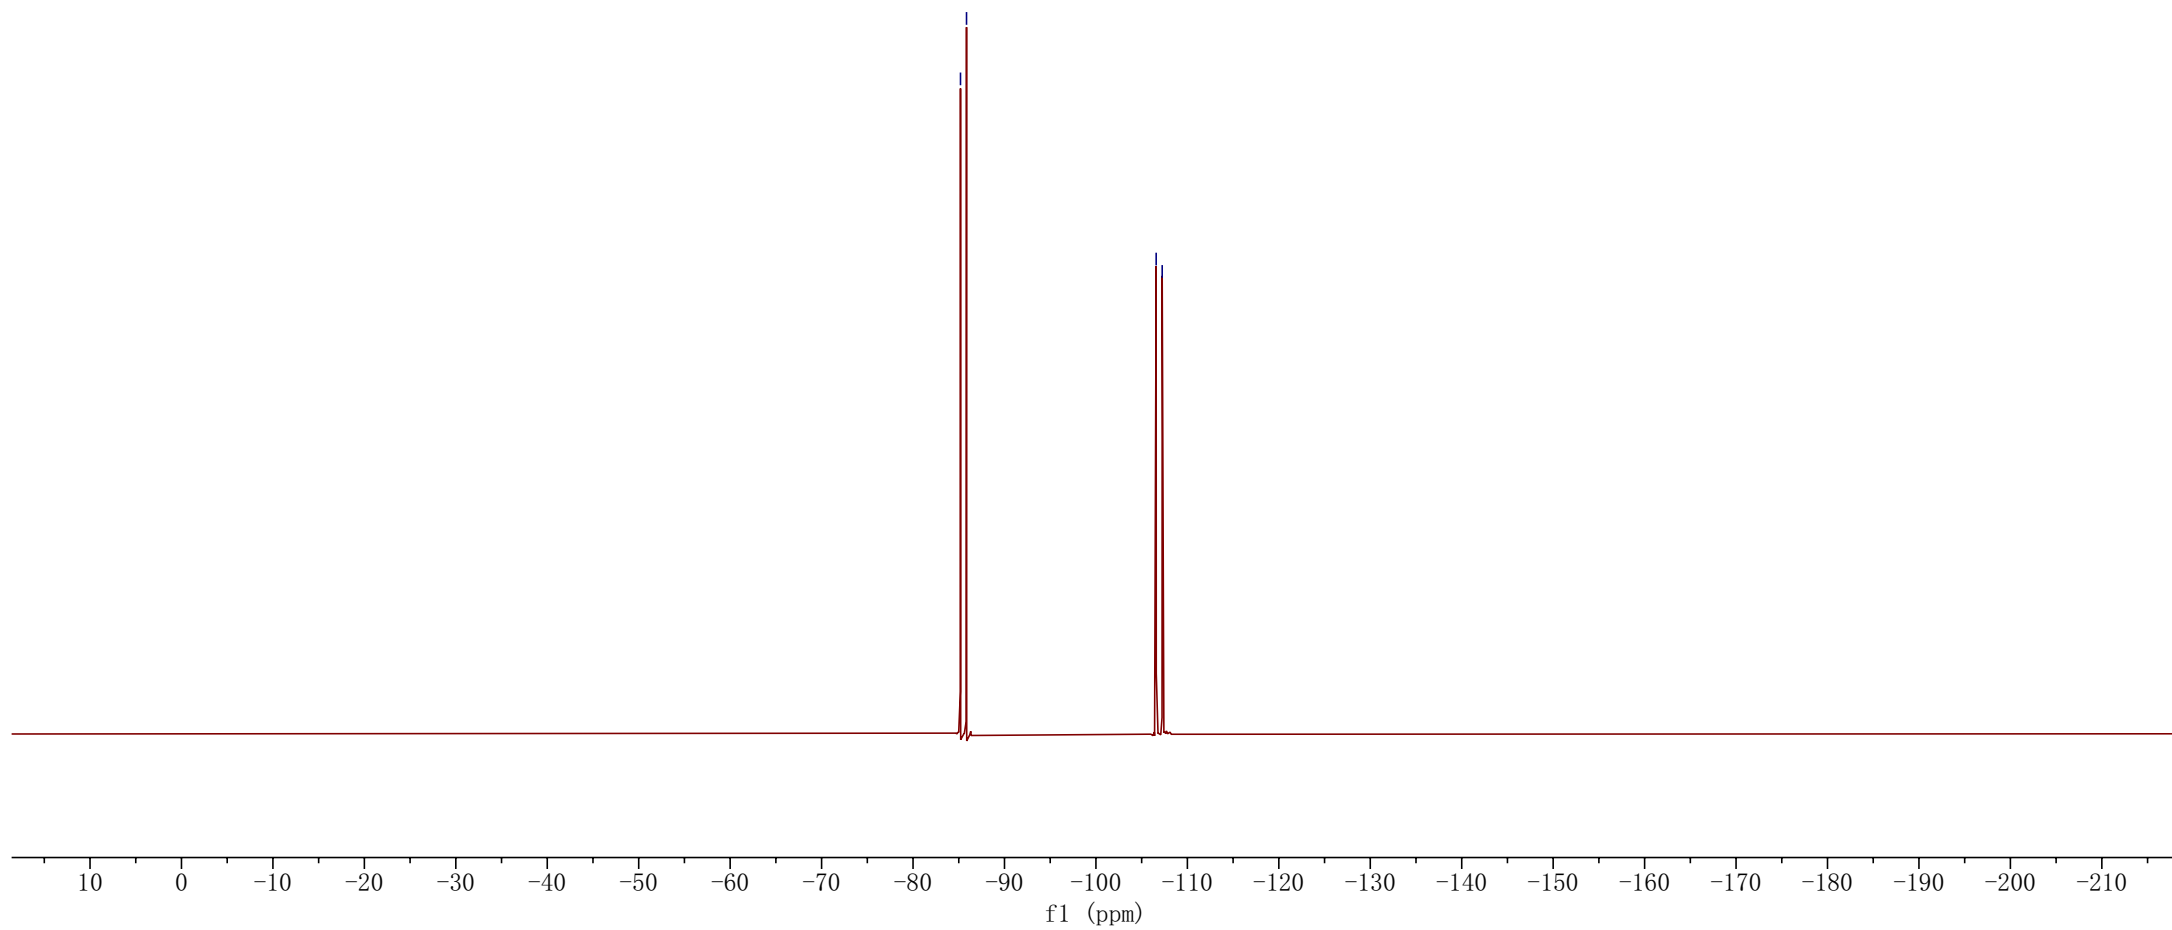

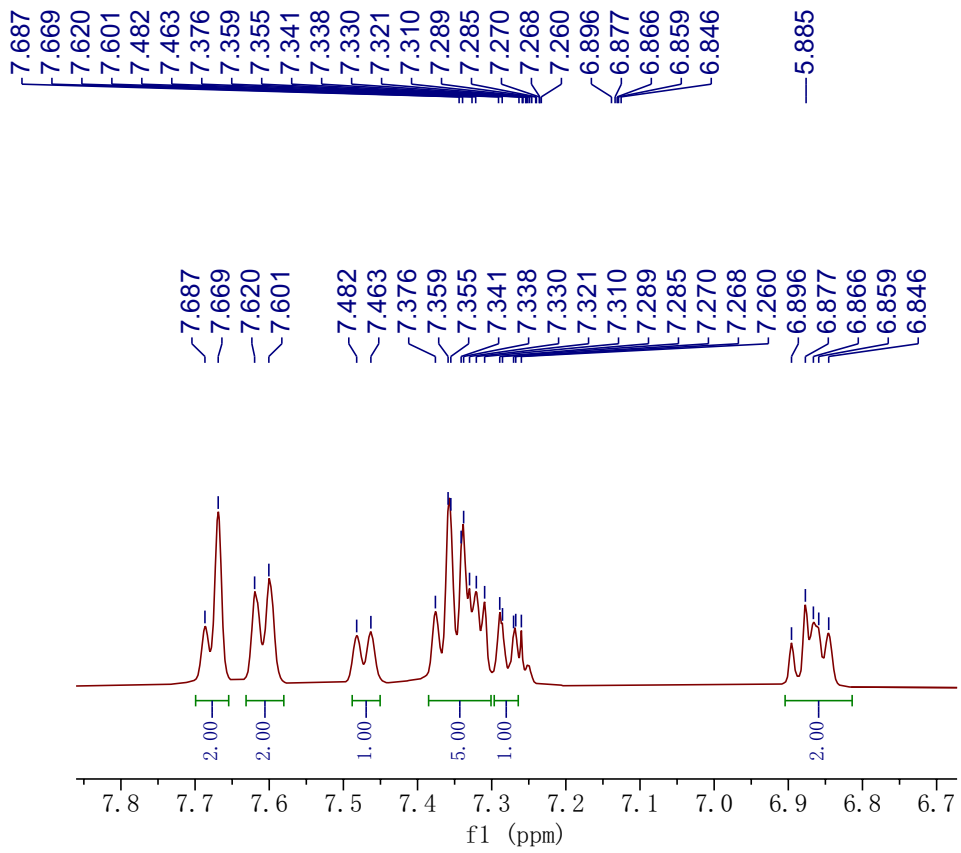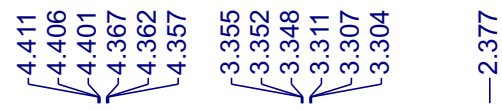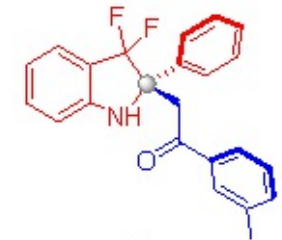

**3ag**  
<sup>1</sup>H NMR (400 MHz, CDCl<sub>3</sub>)

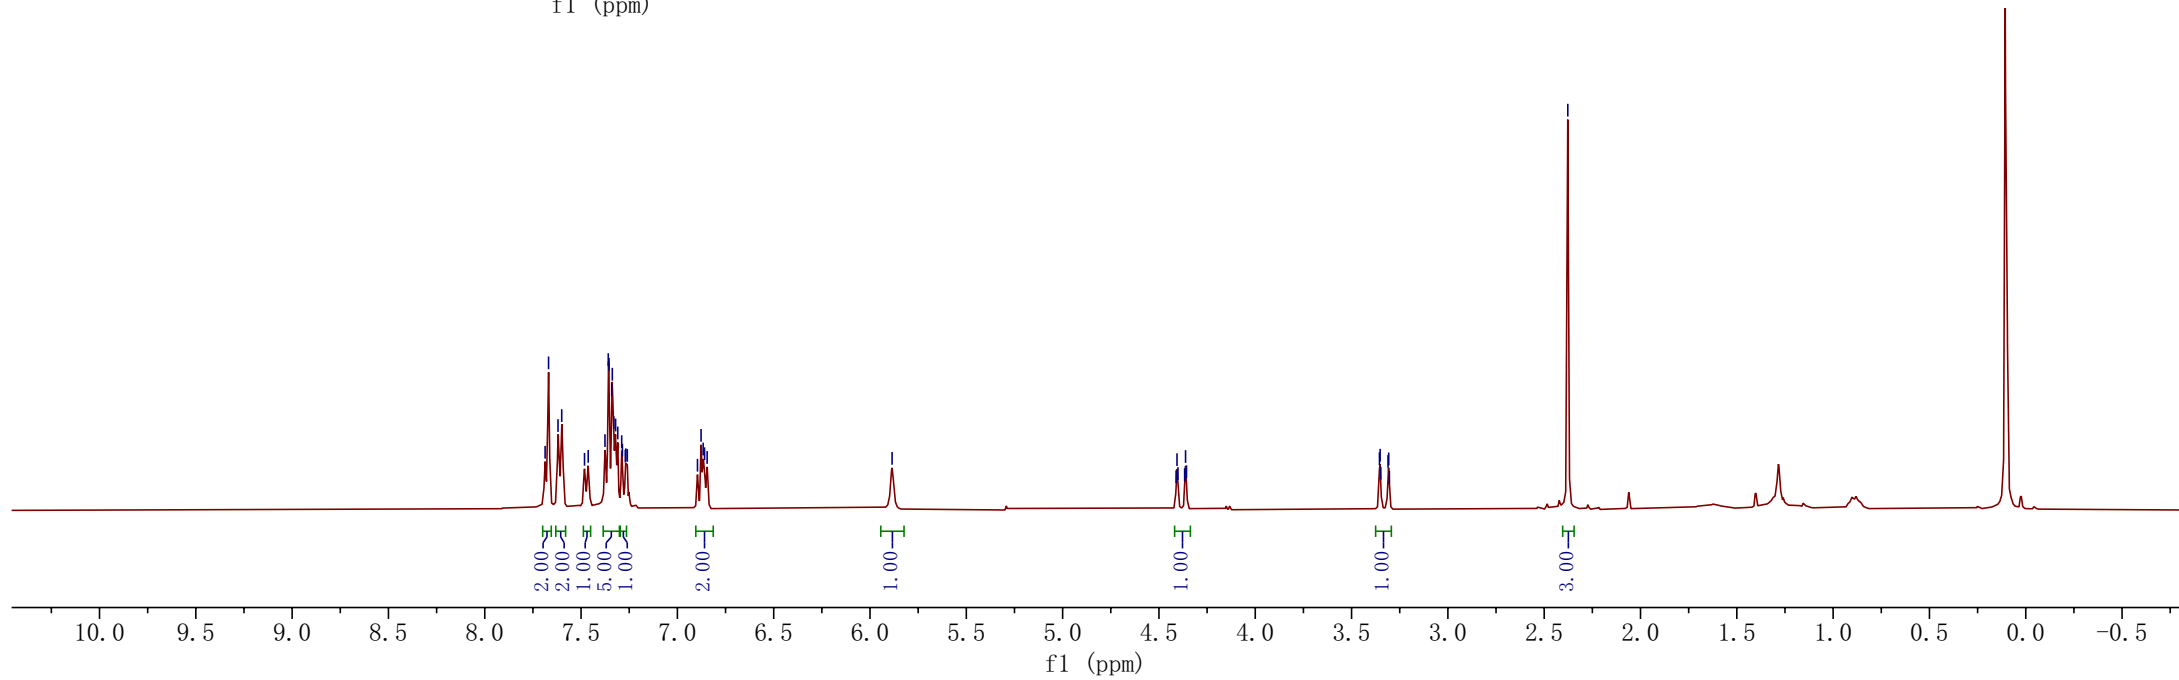

198.46  
198.44  
149.72  
149.67  
149.65  
149.59  
138.48  
137.47  
137.42  
136.89  
134.41  
132.99  
129.25  
128.51  
128.48  
128.20  
127.67  
126.76  
126.53  
125.20  
124.33  
124.26  
120.37  
120.12  
119.86  
119.21  
111.21

77.32  
77.00  
76.68  
72.08  
71.87  
71.81  
71.59

42.13  
42.11  
42.04  
42.02

21.26

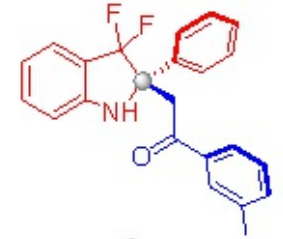

<sup>13</sup>C NMR (100 MHz, CDCl<sub>3</sub>)

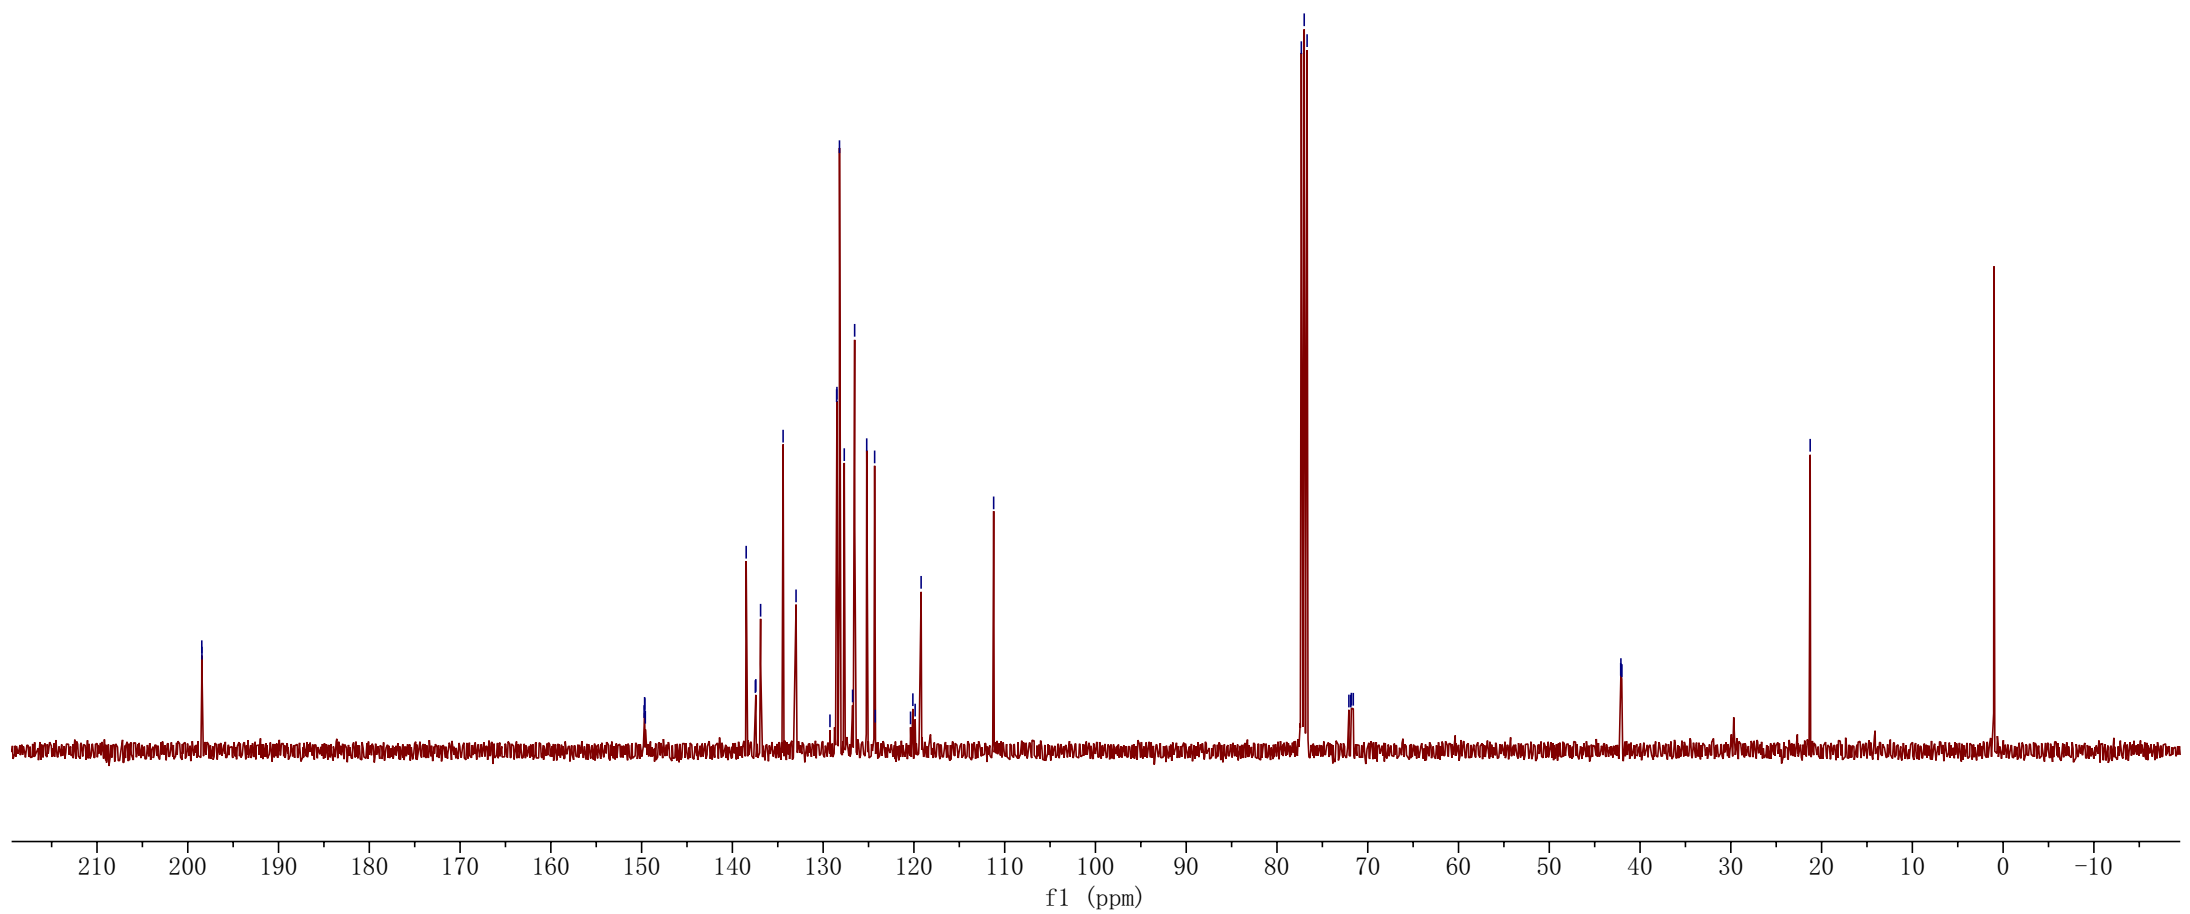

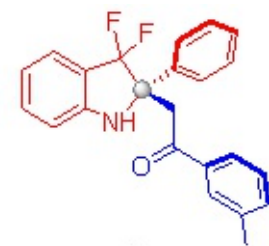

**3ag**  
<sup>19</sup>F NMR (376 MHz, CDCl<sub>3</sub>)

-84.97  
-84.99  
-85.63  
-85.65

-107.02  
-107.04  
-107.67  
-107.70

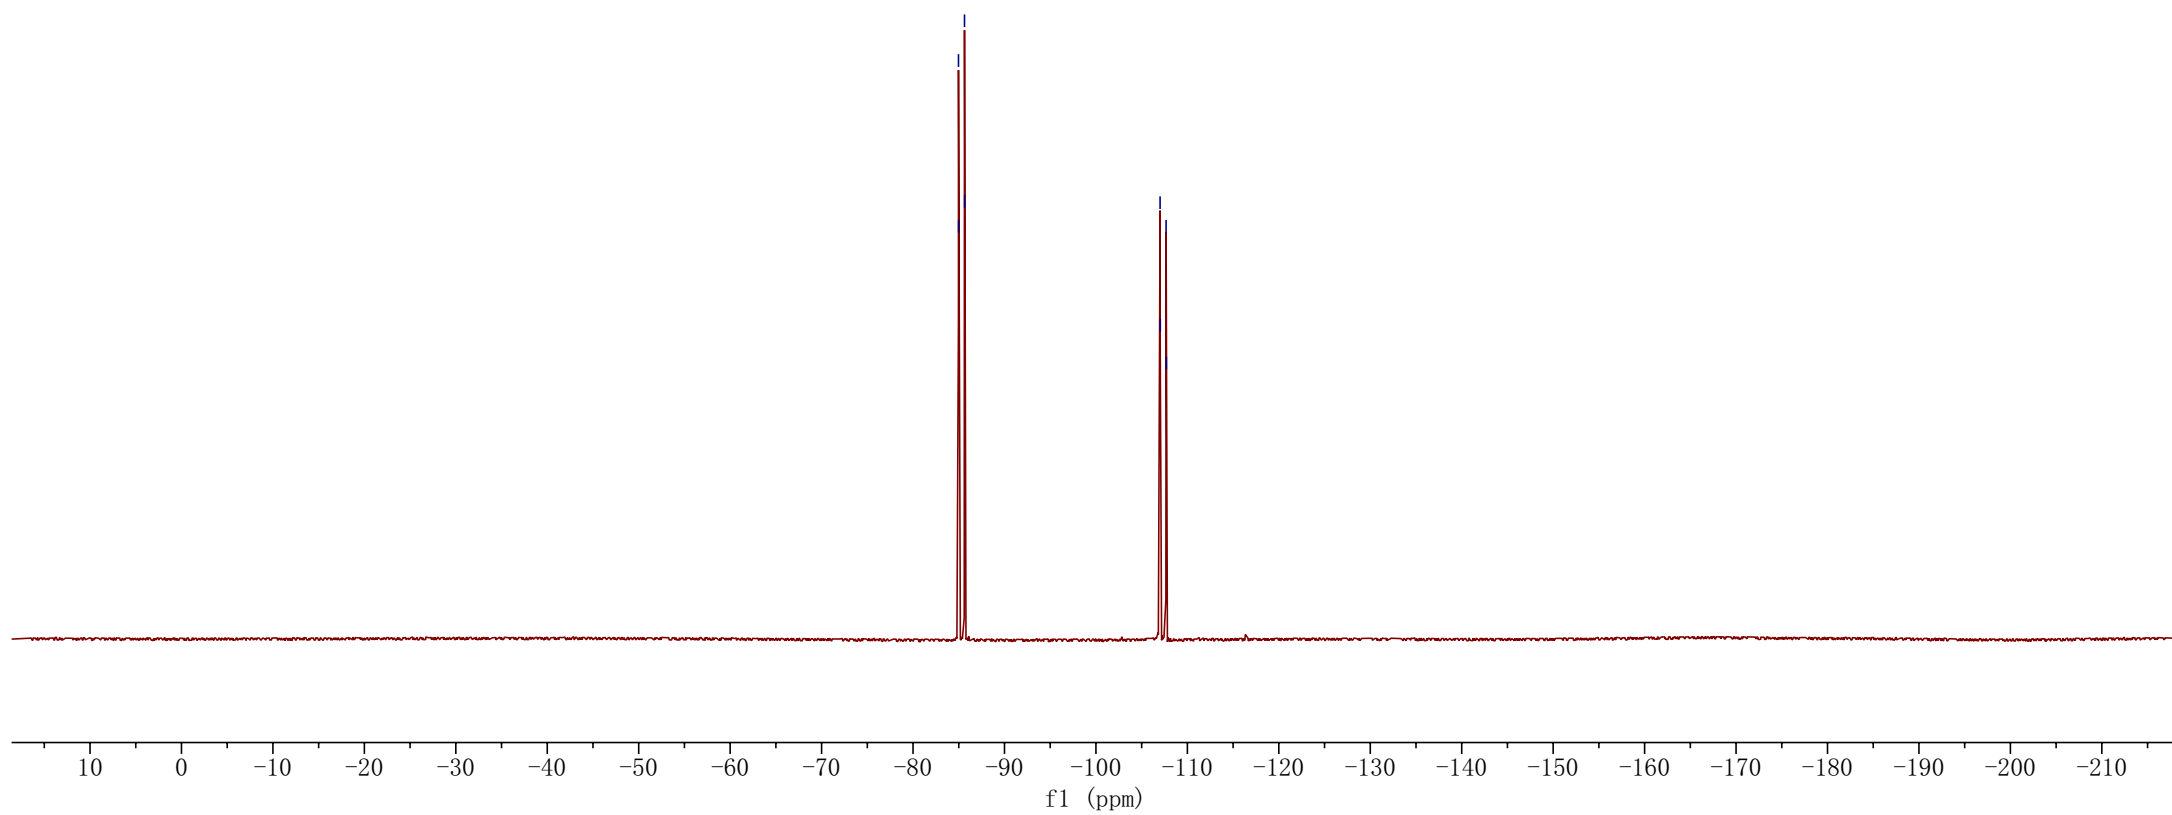

7.513  
7.494  
7.392  
7.389  
7.386  
7.373  
7.370  
7.358  
7.259  
7.253  
7.241  
7.236  
7.232  
7.222  
7.213  
7.189  
7.171  
7.159  
7.009  
7.007  
7.003  
7.000  
6.986  
6.982  
6.793  
6.775  
6.763  
6.757  
6.755  
6.742  
6.755

4.298  
4.294  
4.254  
4.249  
3.695  
3.261  
3.258  
3.255  
3.213

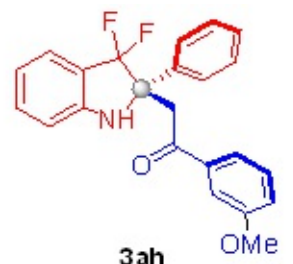

<sup>1</sup>H NMR (400 MHz, CDCl<sub>3</sub>)

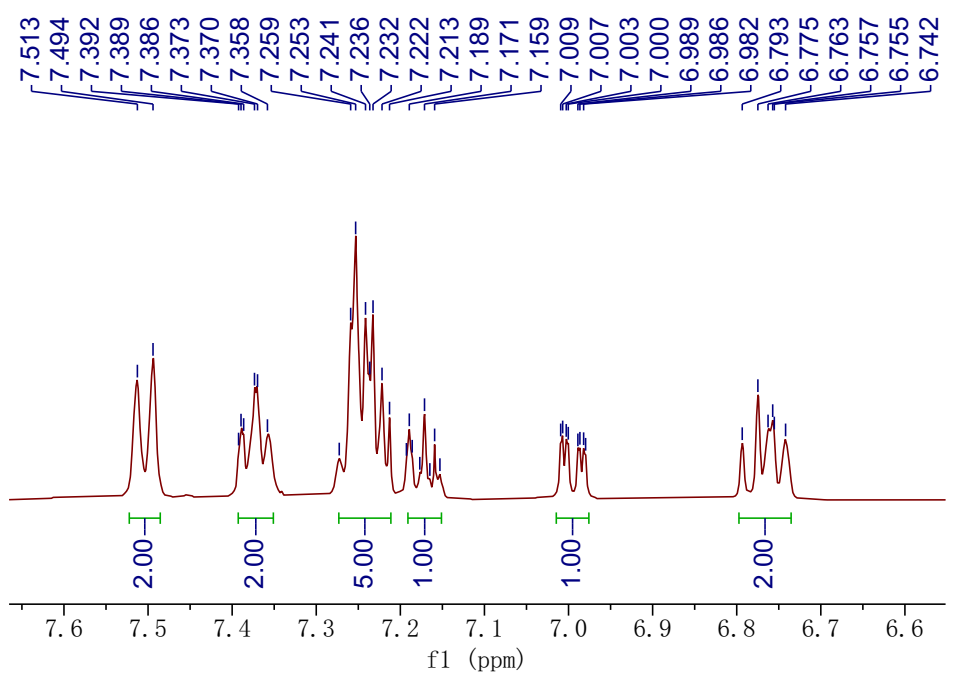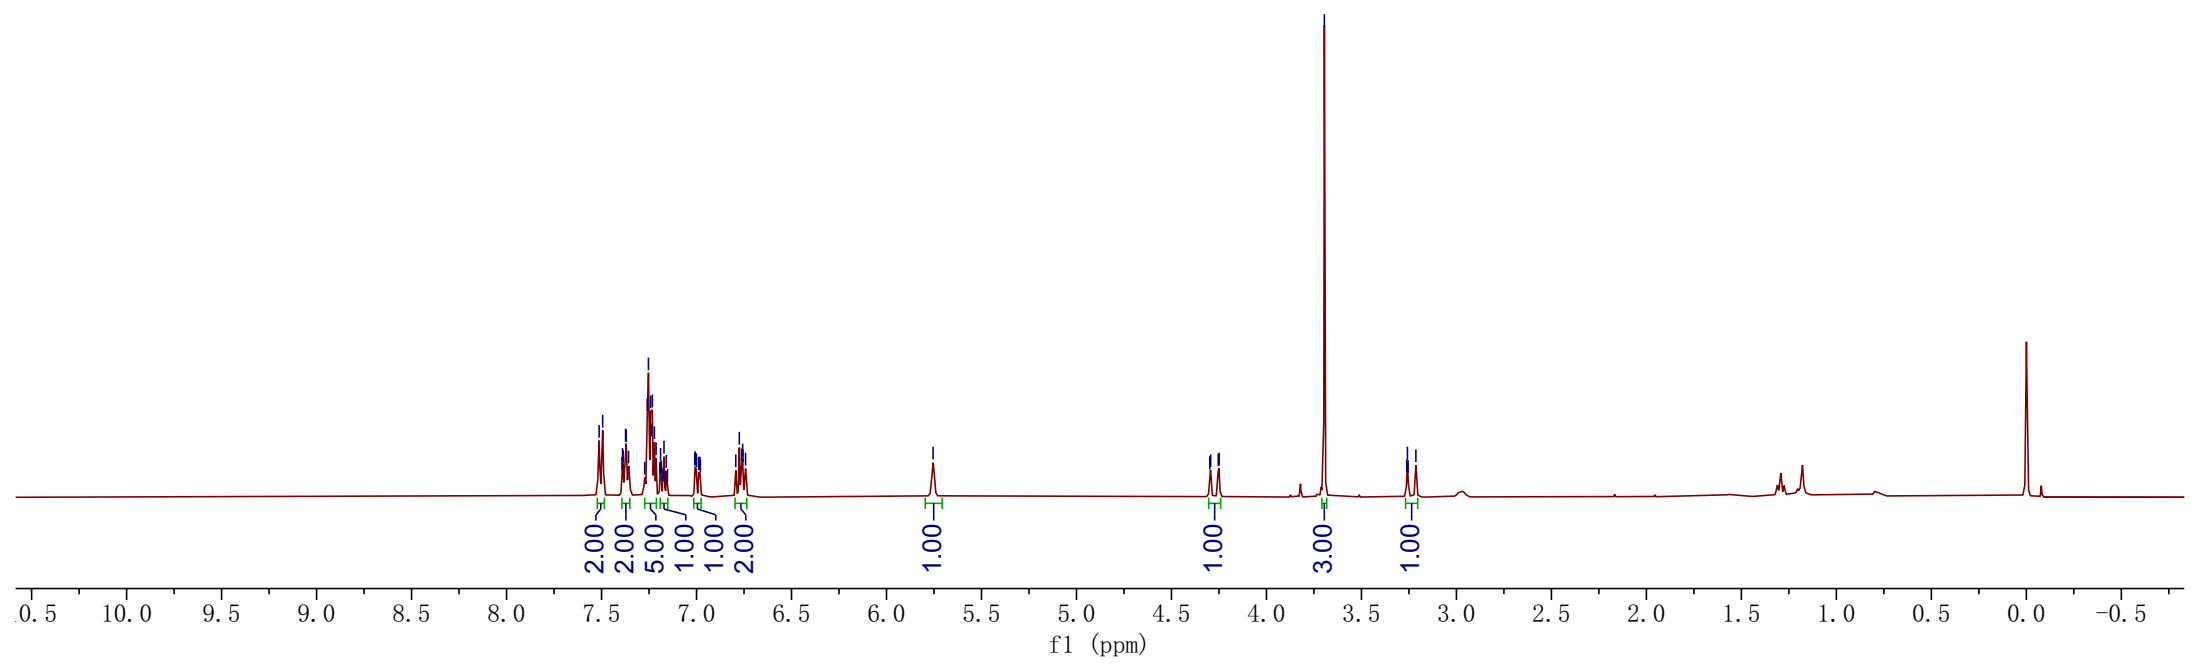

198.12  
198.11

159.78  
149.66  
149.61  
149.58  
149.53  
138.16  
137.43  
137.37  
132.99  
129.63  
129.19  
128.22  
127.70  
126.69  
126.49  
124.32  
124.20  
120.64  
120.32  
120.18  
120.07  
120.06  
119.81  
119.24  
112.09  
111.19  
77.32  
77.00  
76.68  
72.04  
71.83  
71.77  
71.56  
55.37  
42.23  
42.21  
42.14  
42.11

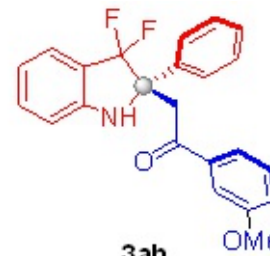

<sup>13</sup>C NMR (100 MHz, CDCl<sub>3</sub>)

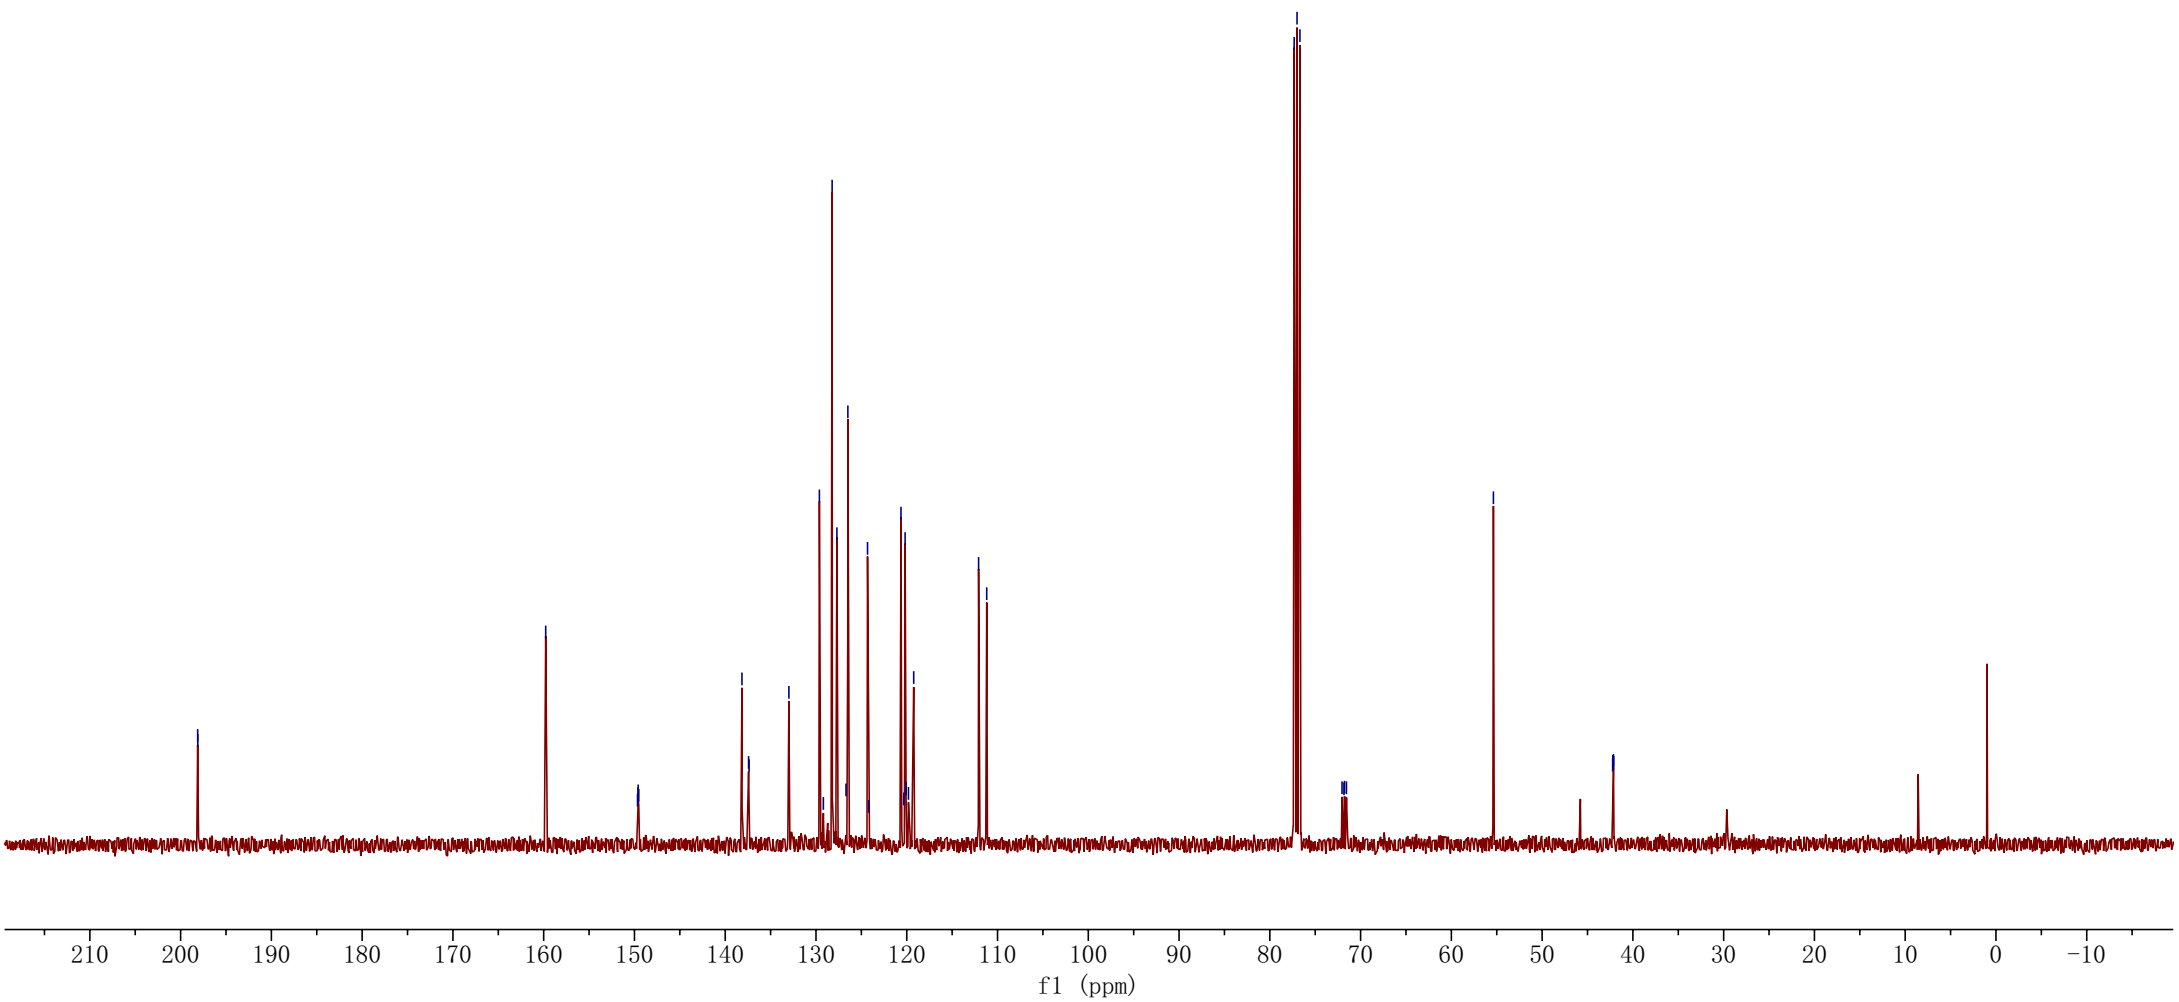



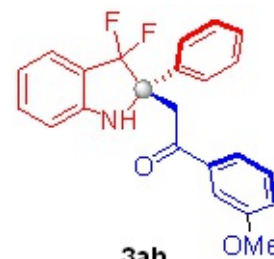

<sup>19</sup>F NMR (376 MHz, CDCl<sub>3</sub>)

-84.99  
-85.65

-106.95  
-107.60

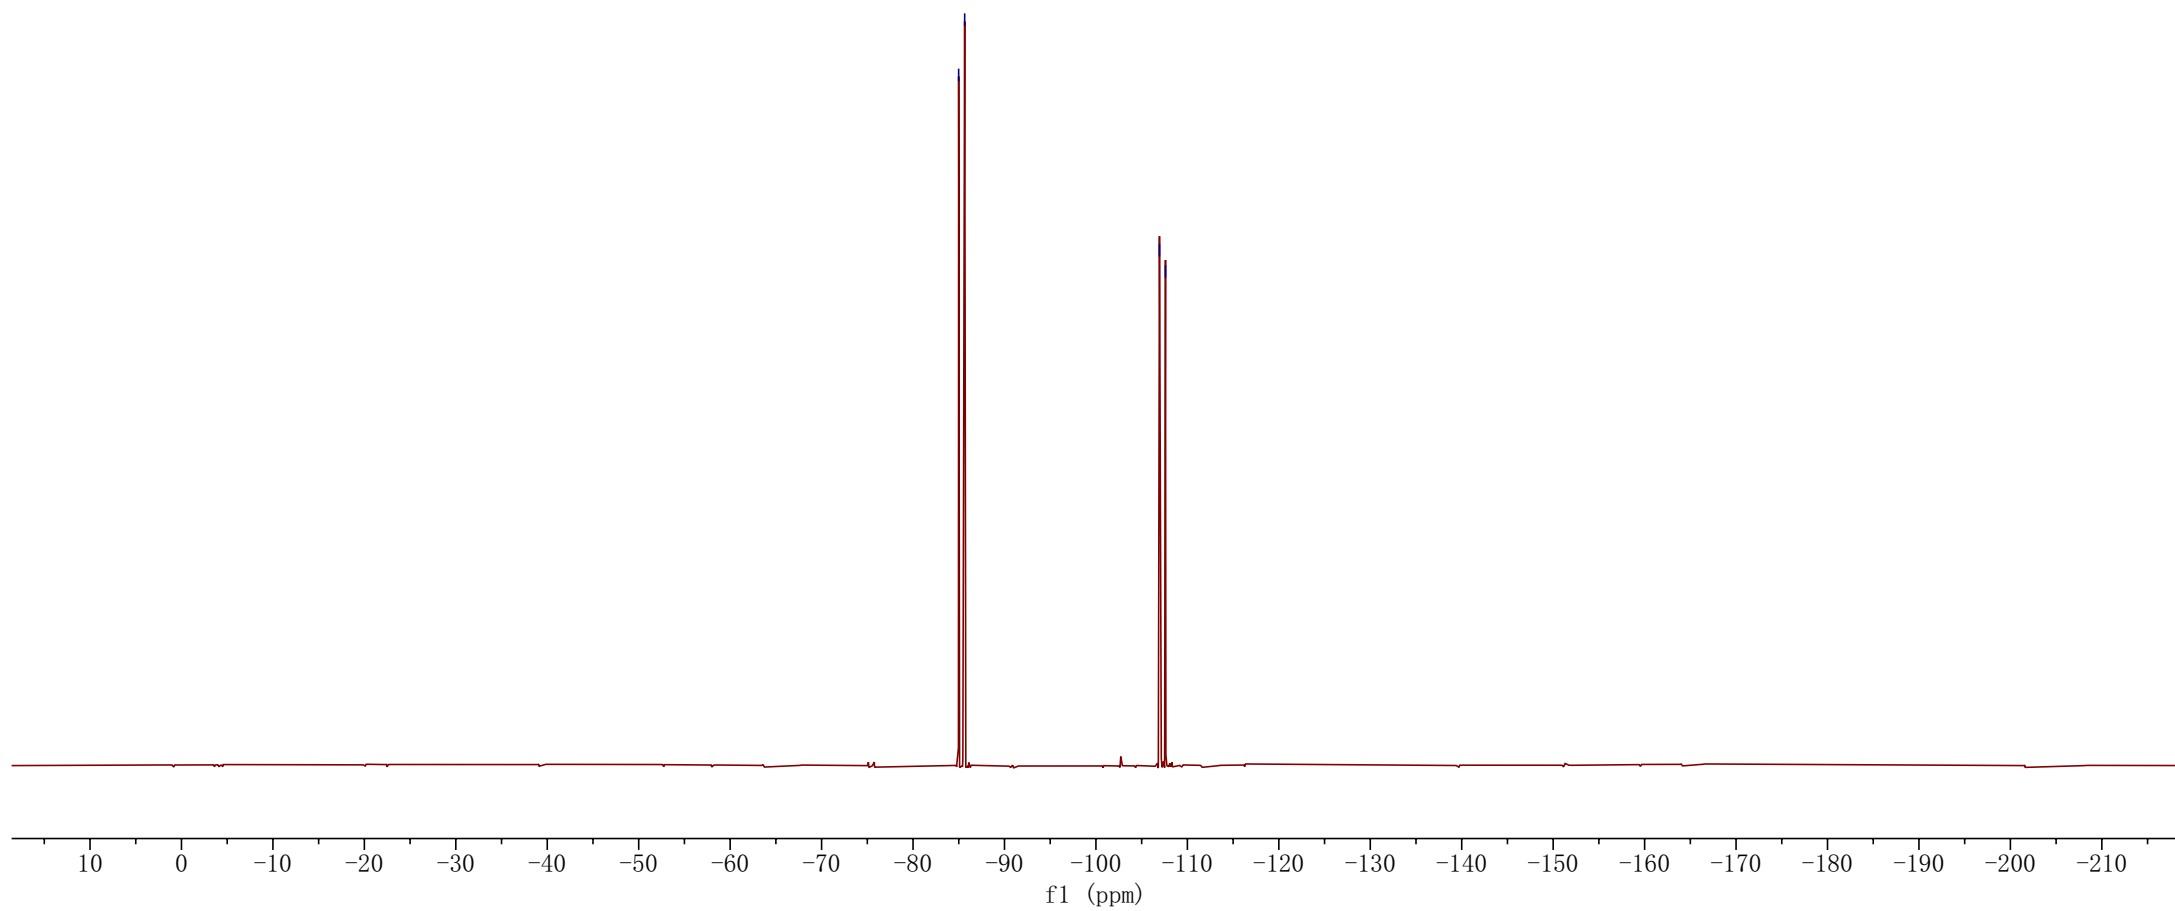

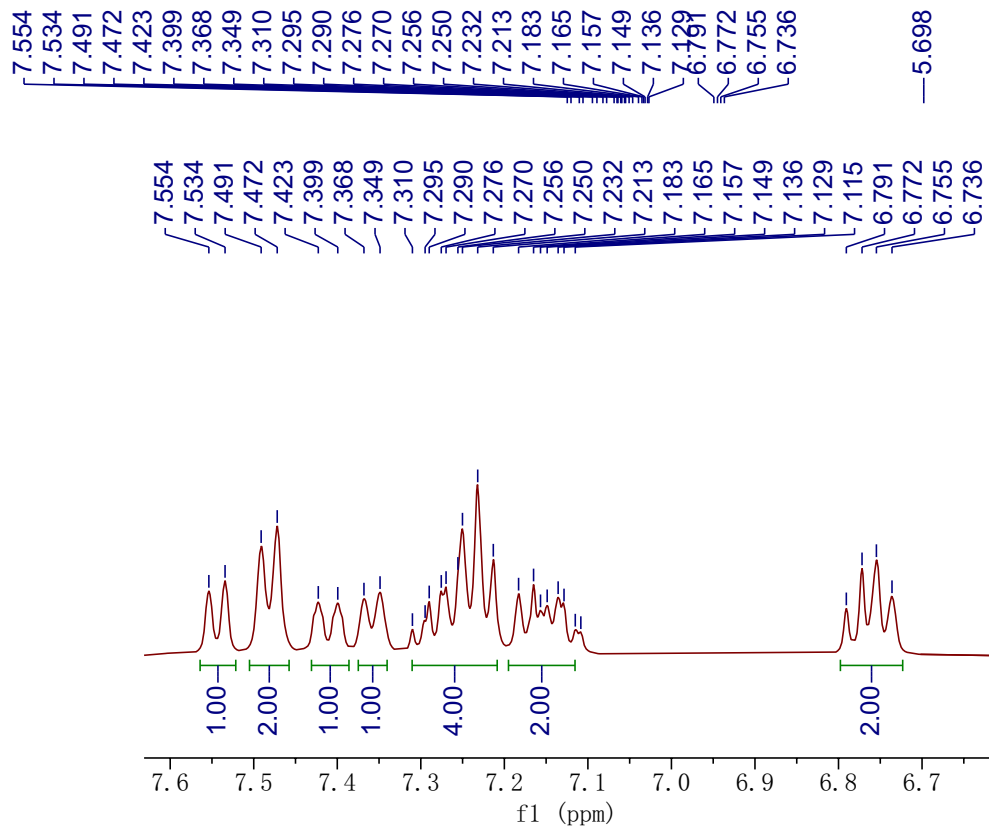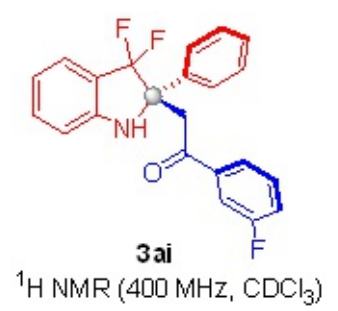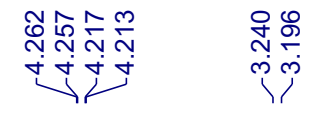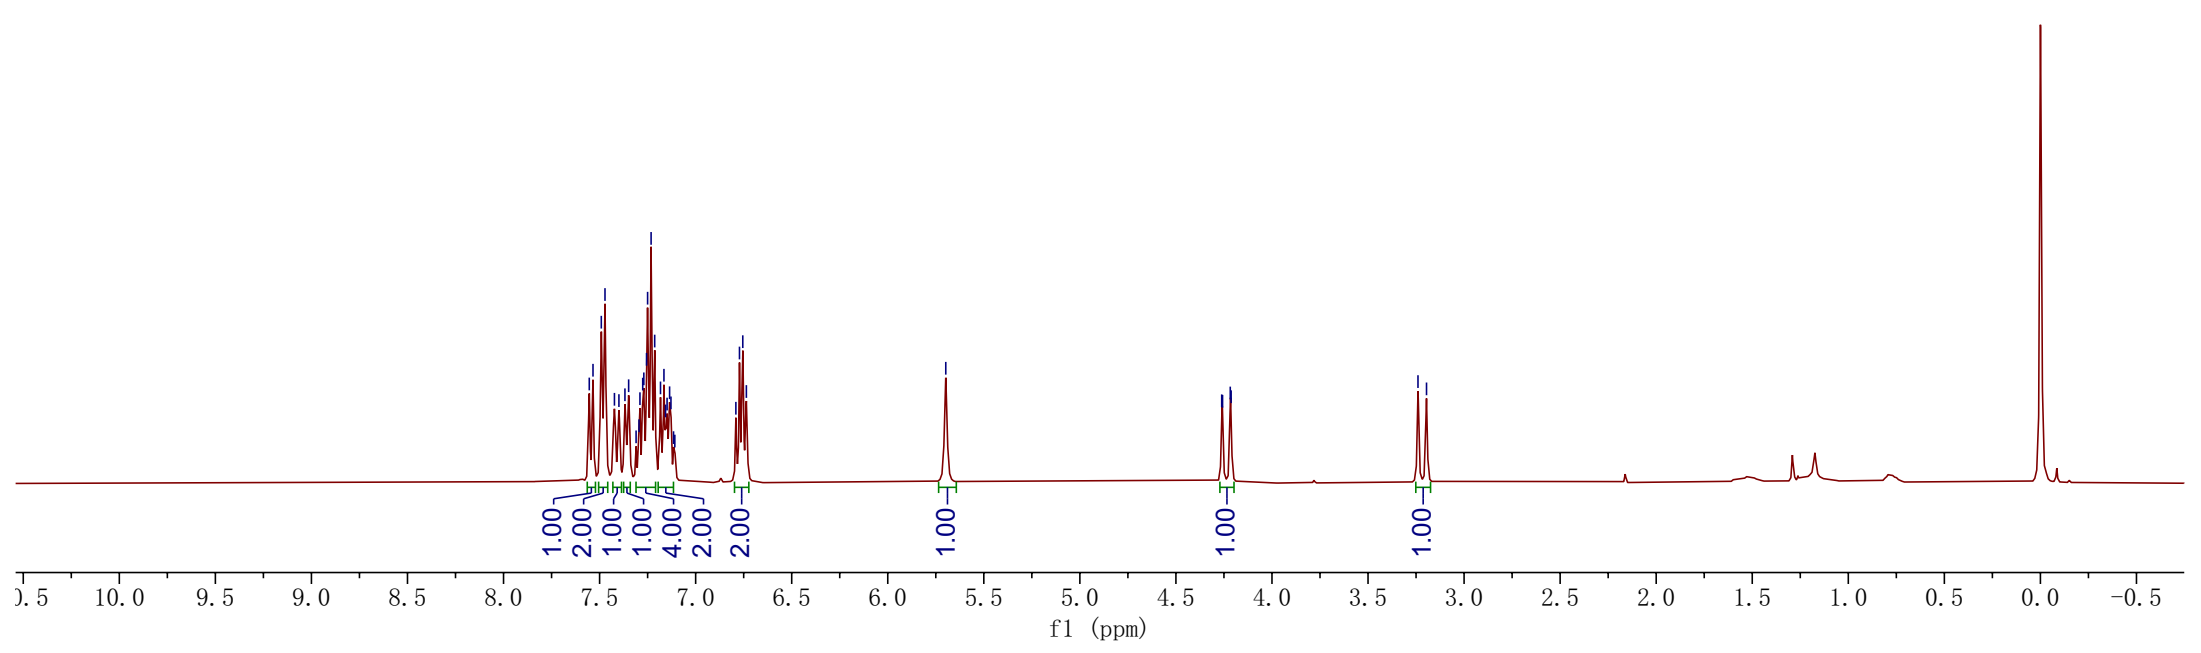

—197.08

—163.95  
—161.48

—149.58

—149.52

—149.50

—149.44

—138.84

—138.78

—137.24

—137.18

—133.06

—130.38

—130.30

—129.14

—128.28

—127.80

—126.64

—126.45

—124.35

—124.14

—123.77

—123.74

—120.79

—120.58

—120.23

—119.98

—119.73

—119.34

—114.79

—114.56

—111.20

—77.32

—77.00

—76.68

—71.96

—71.75

—71.68

—71.47

—42.39

—42.37

—42.29

—42.27

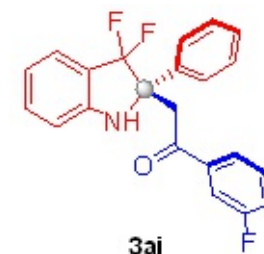

<sup>13</sup>C NMR (100 MHz, CDCl<sub>3</sub>)

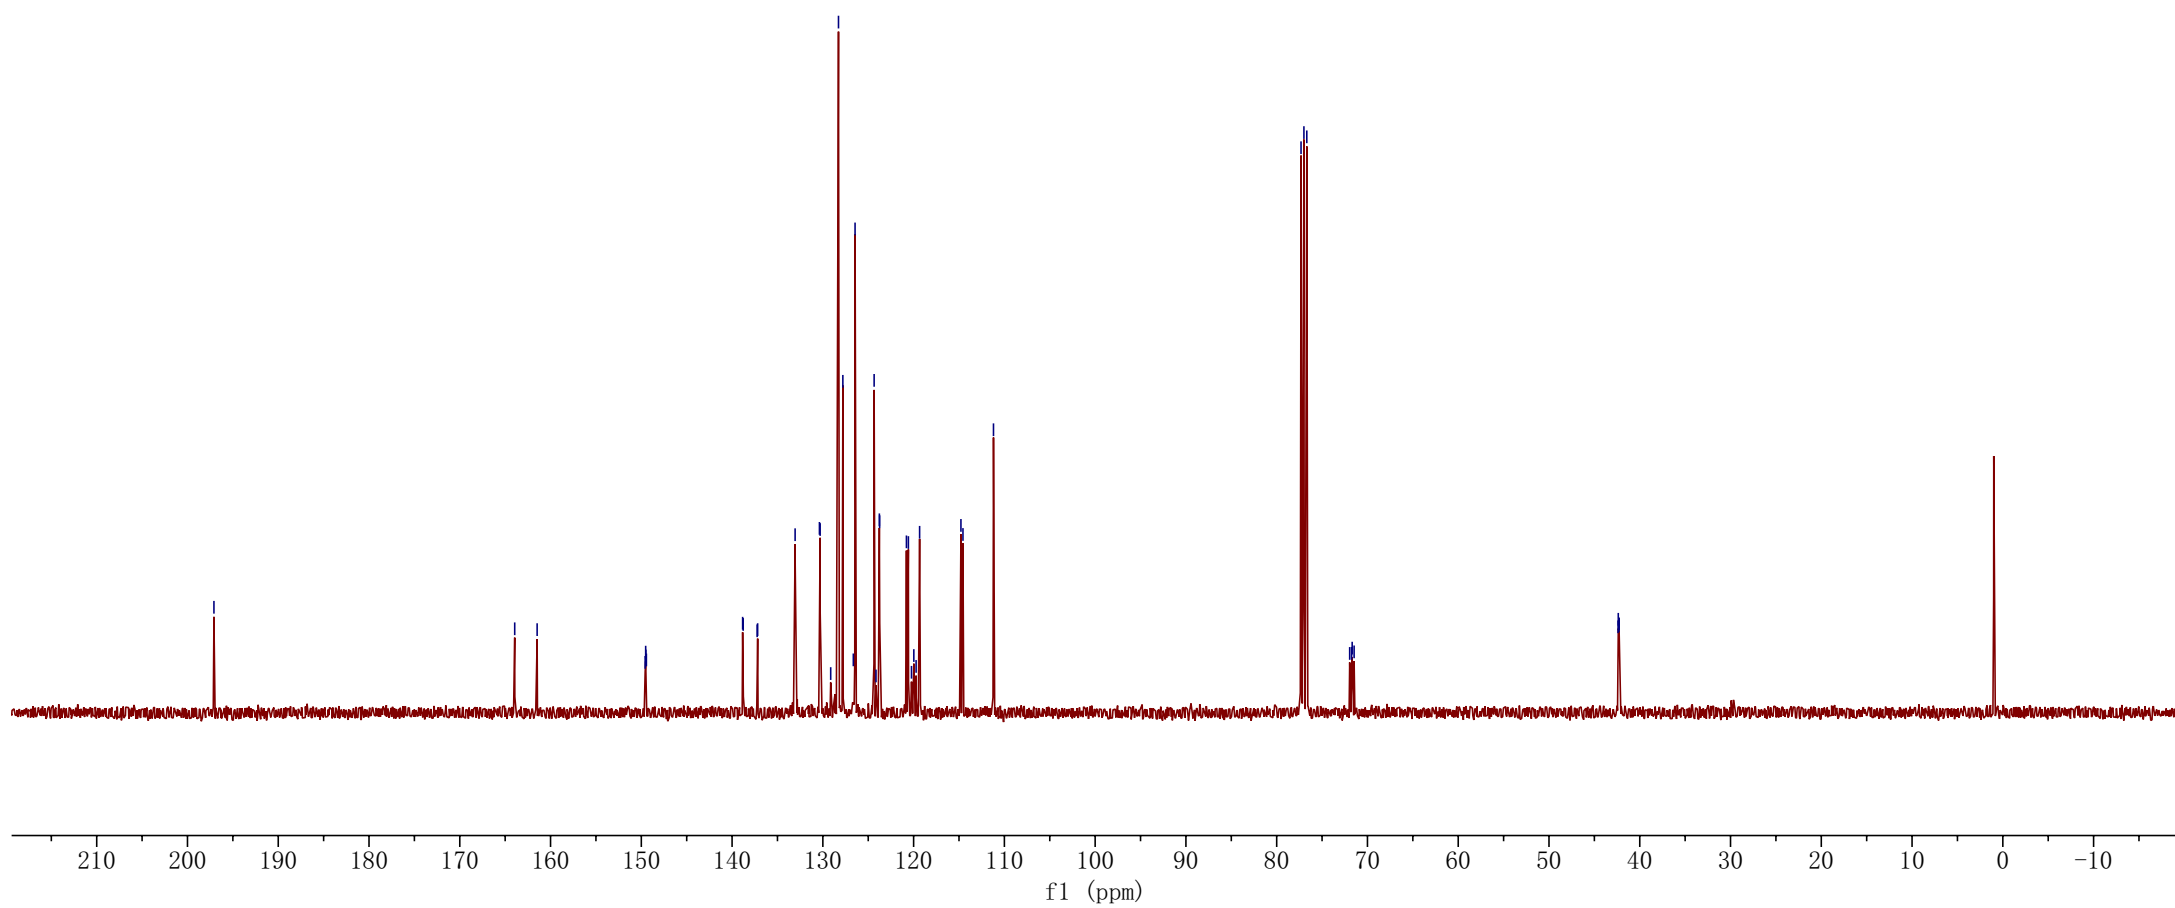

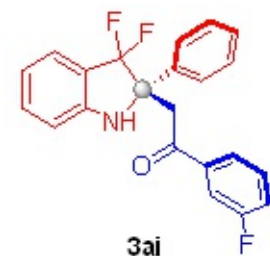

<sup>19</sup>F NMR (376 MHz, CDCl<sub>3</sub>)

-85.22  
-85.88

106.47  
107.13  
111.29

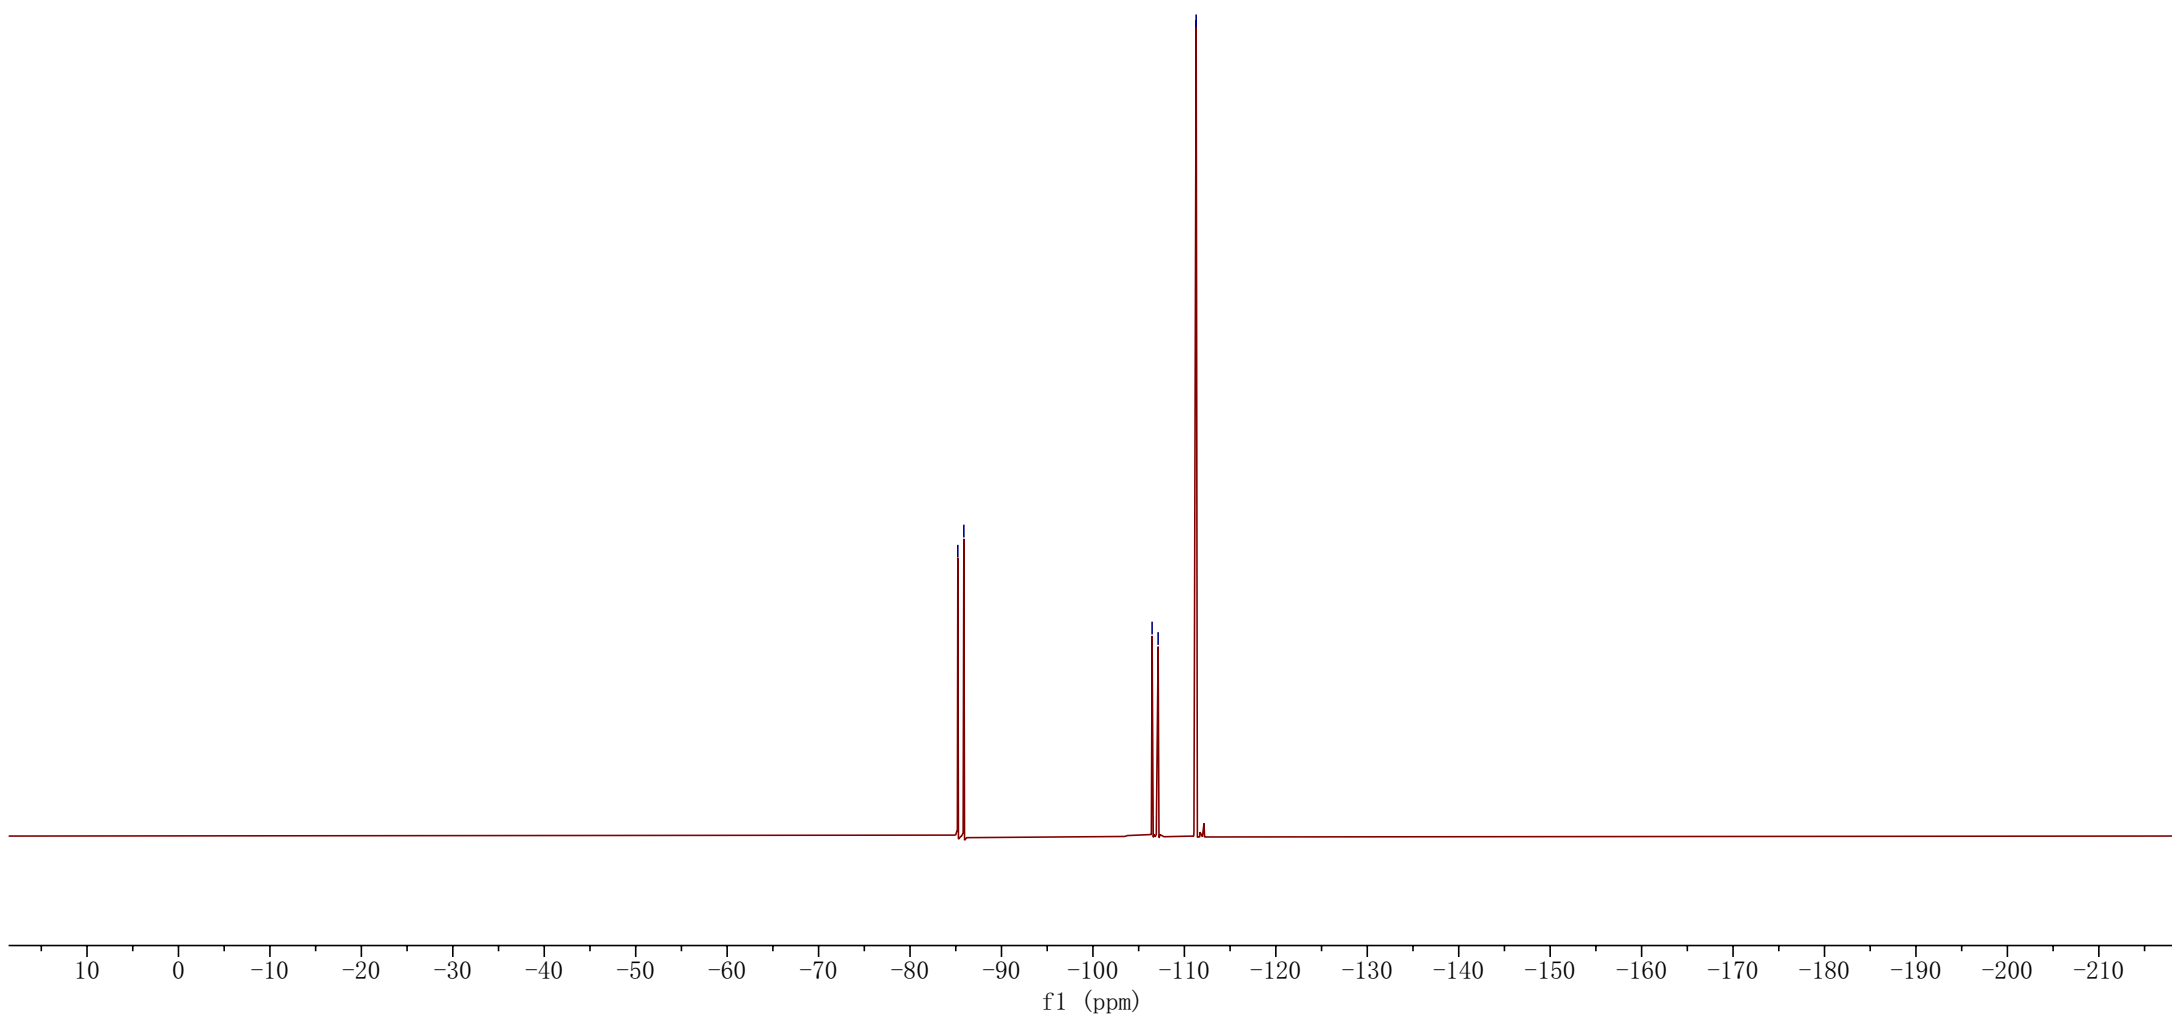

7.739  
7.735  
7.730  
7.676  
7.673  
7.669  
7.656  
7.653  
7.650  
7.507  
7.503  
7.498  
7.489  
7.485  
7.483  
7.476  
7.456  
7.453  
7.450  
7.448  
7.436  
7.433  
7.430  
7.428  
7.391  
7.373  
7.309  
7.298  
7.289  
7.281  
7.278  
7.273  
7.269  
7.260  
7.256  
7.244  
7.240  
7.215  
7.211  
7.208  
7.199  
7.193  
7.187  
7.183  
7.175  
6.818  
6.801  
6.799  
6.788  
6.782  
6.780  
6.767  
5.690  
4.273  
4.268  
4.228  
4.224  
3.268  
3.264  
3.261  
3.223  
3.220  
3.217

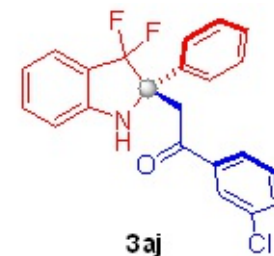

<sup>1</sup>H NMR (400MHz, CDCl<sub>3</sub>)

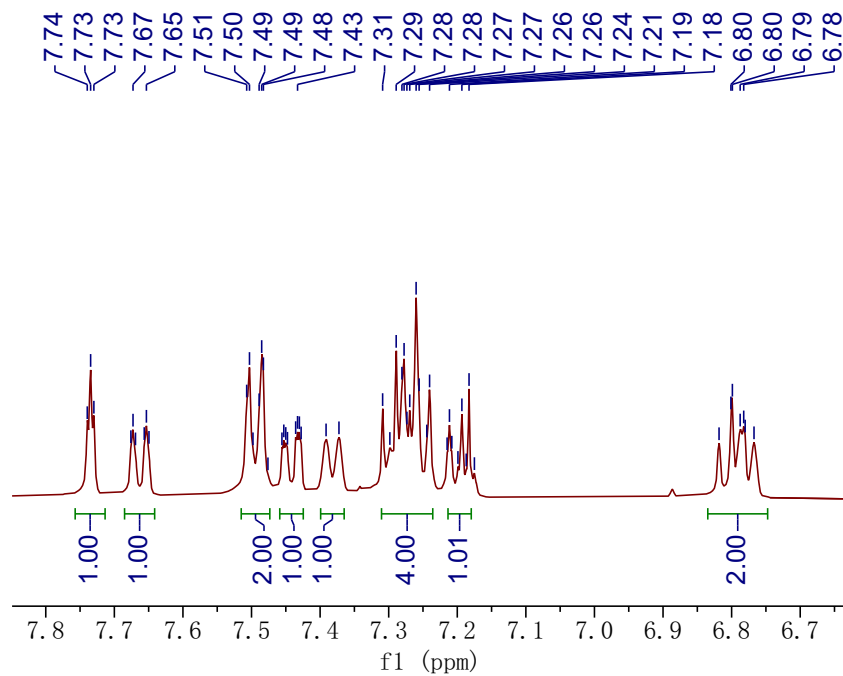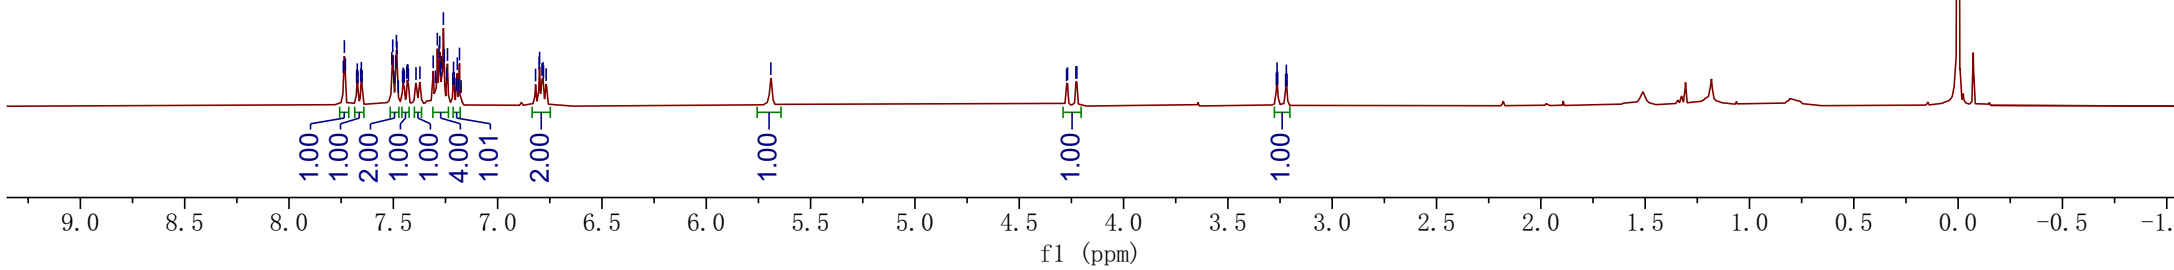

197.08  
149.55  
149.49  
149.47  
149.41  
138.25  
137.20  
137.14  
135.04  
133.59  
133.07  
129.99  
129.12  
128.30  
128.08  
127.83  
126.63  
126.45  
126.07  
124.38  
124.12  
120.23  
119.97  
119.72  
119.38  
111.22

77.32  
77.00  
76.68  
71.96  
71.74  
71.68  
71.47

42.40  
42.38  
42.30  
42.28

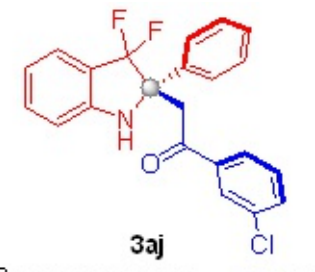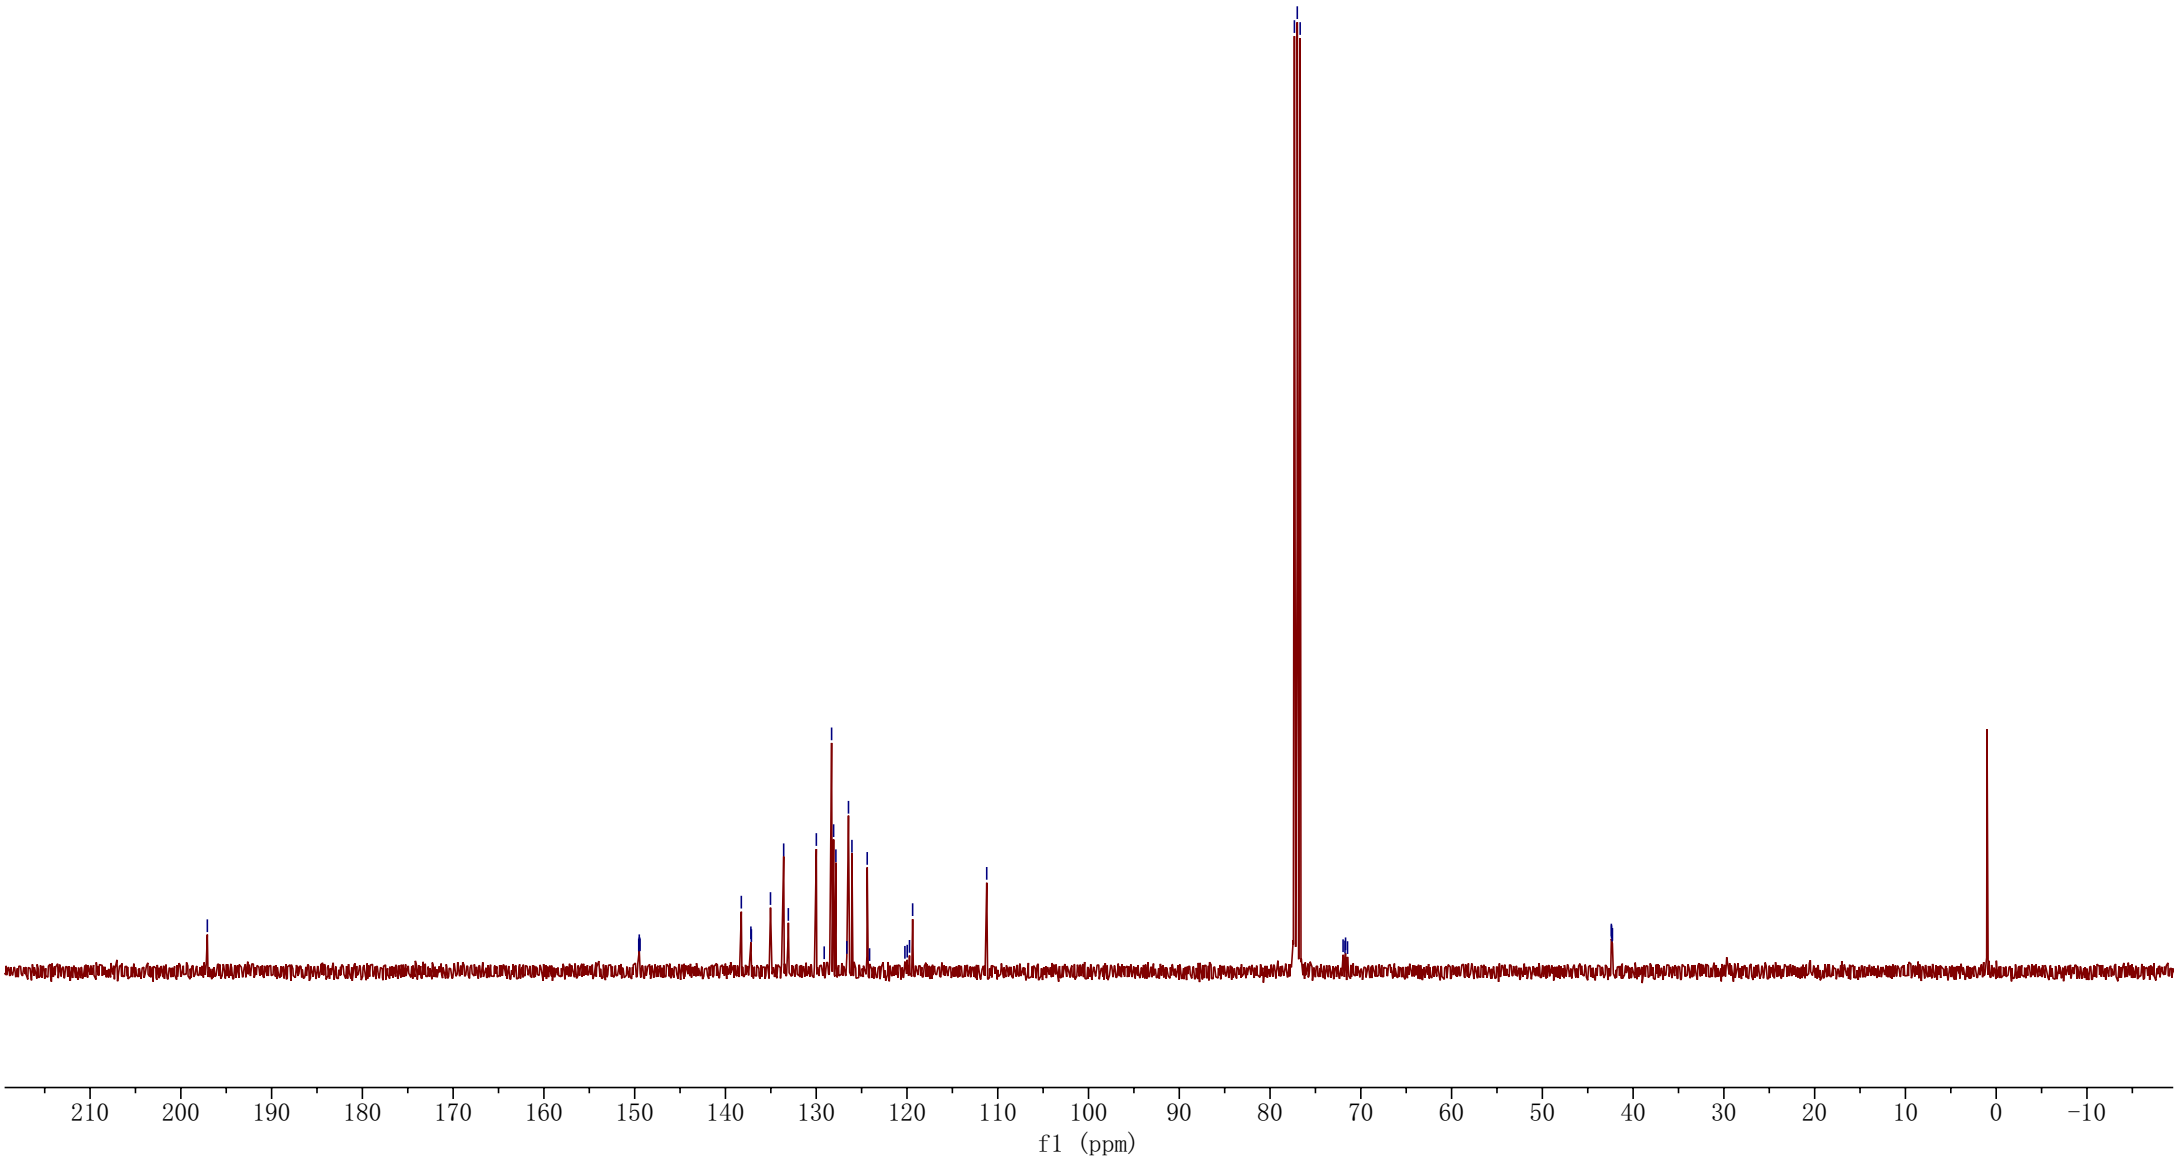

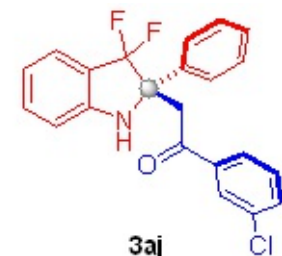

<sup>19</sup>F NMR (376MHz, CDCl<sub>3</sub>)

-85.25  
-85.90

-106.41  
-107.07

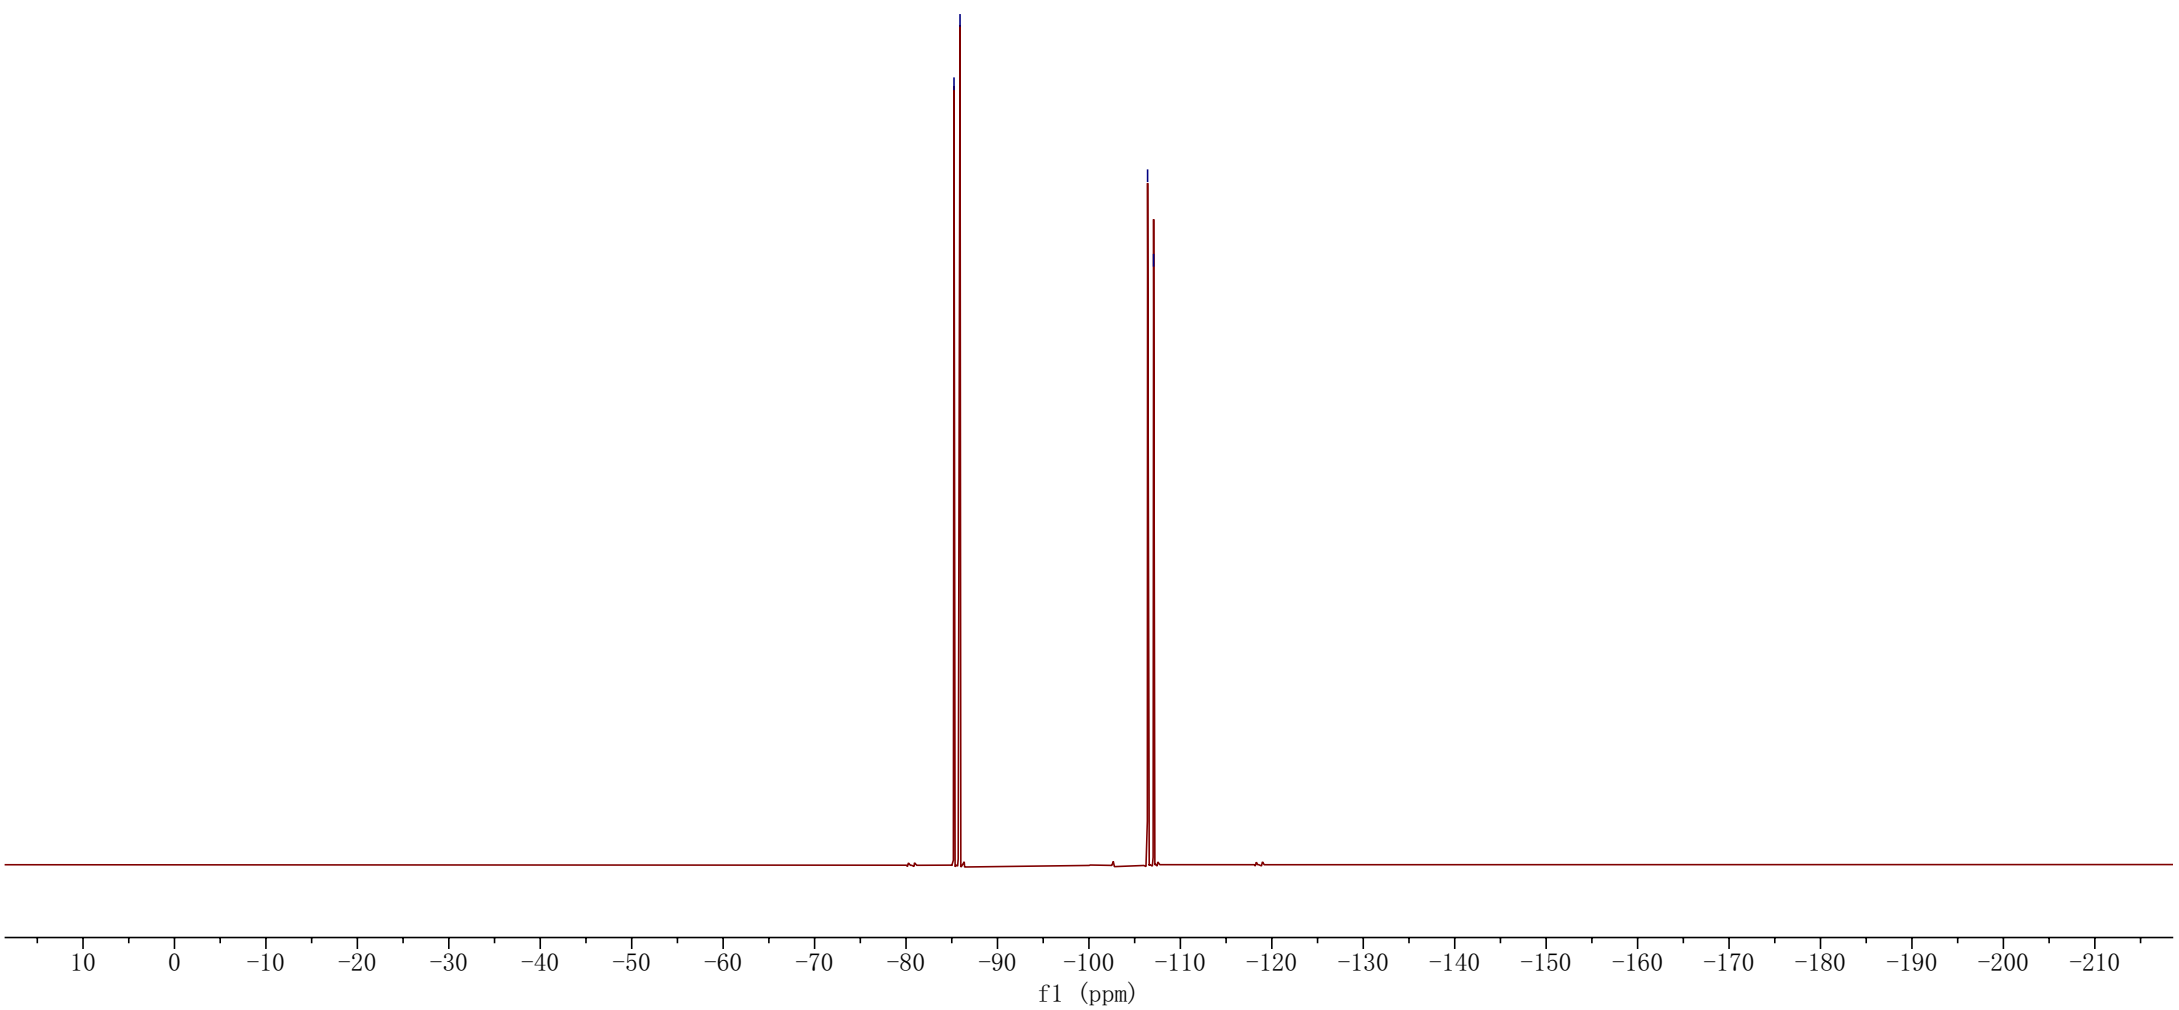

7.893  
7.889  
7.884  
7.717  
7.700  
7.698  
7.696  
7.693  
7.604  
7.602  
7.587  
7.584  
7.582  
7.506  
7.502  
7.484  
7.391  
7.372  
7.281  
7.278  
7.274  
7.261  
7.257  
7.245  
7.241  
7.225  
7.212  
7.209  
7.205  
7.194  
7.182  
6.818  
6.801  
6.799  
6.786  
6.783  
6.782  
6.766  
4.265  
4.261  
4.221  
4.216  
3.262  
3.259  
3.221  
3.218  
3.215

7.893  
7.889  
7.884  
7.717  
7.698  
7.696  
7.604  
7.602  
7.584  
7.582  
7.506  
7.502  
7.484  
7.281  
7.278  
7.274  
7.261  
7.257  
7.245  
7.241  
7.225  
7.212  
7.205  
7.194  
7.182  
6.801  
6.799  
6.786  
6.783  
6.782

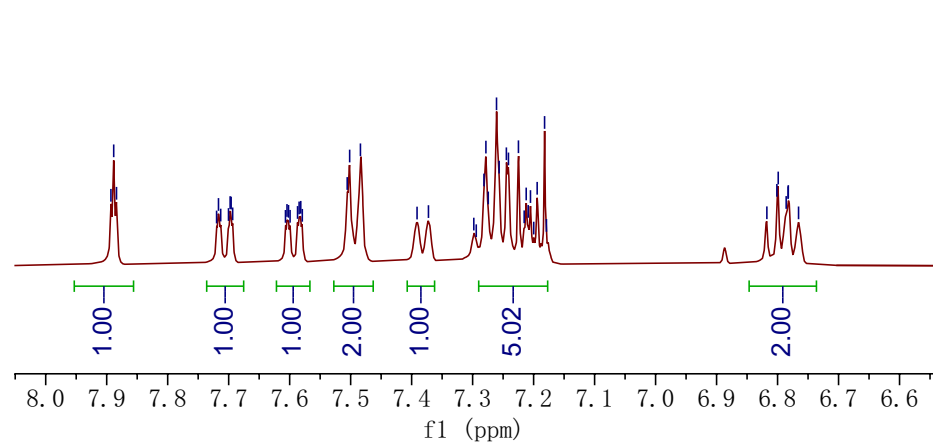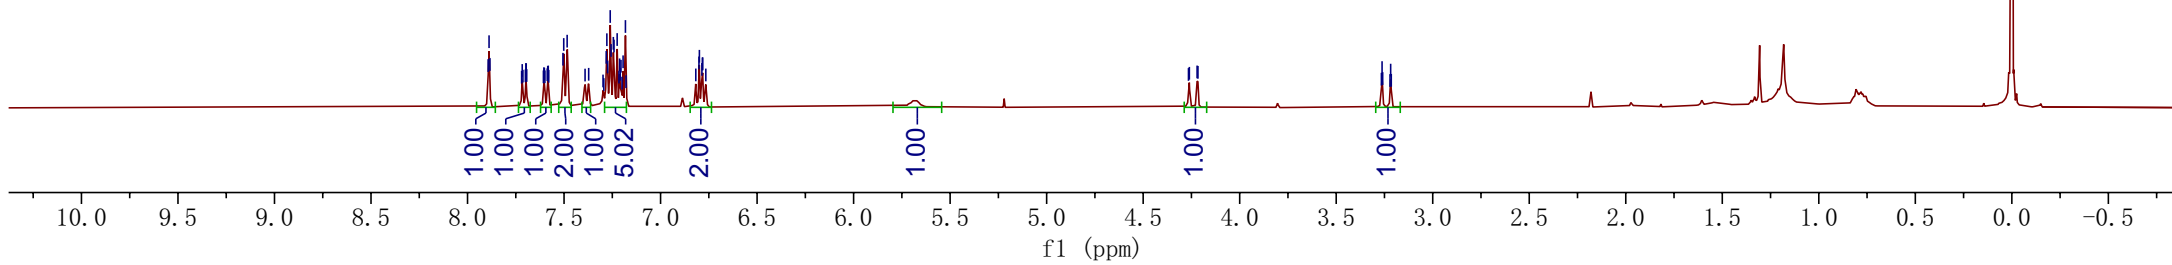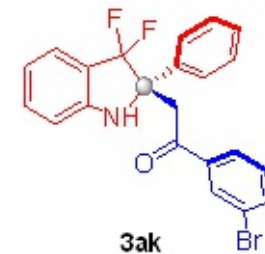

<sup>1</sup>H NMR (400MHz, CDCl<sub>3</sub>)



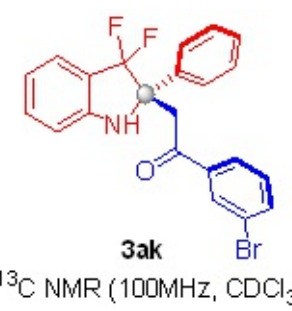

197.00  
196.99  
149.57  
149.52  
149.49  
149.44  
138.50  
137.22  
137.16  
136.48  
133.07  
131.03  
130.22  
129.13  
128.30  
127.83  
126.63  
126.50  
126.46  
124.38  
124.14  
123.03  
120.27  
120.01  
119.76  
119.38  
111.21

77.32  
77.00  
76.68  
71.98  
71.77  
71.70  
71.49

42.39  
42.37  
42.30  
42.28

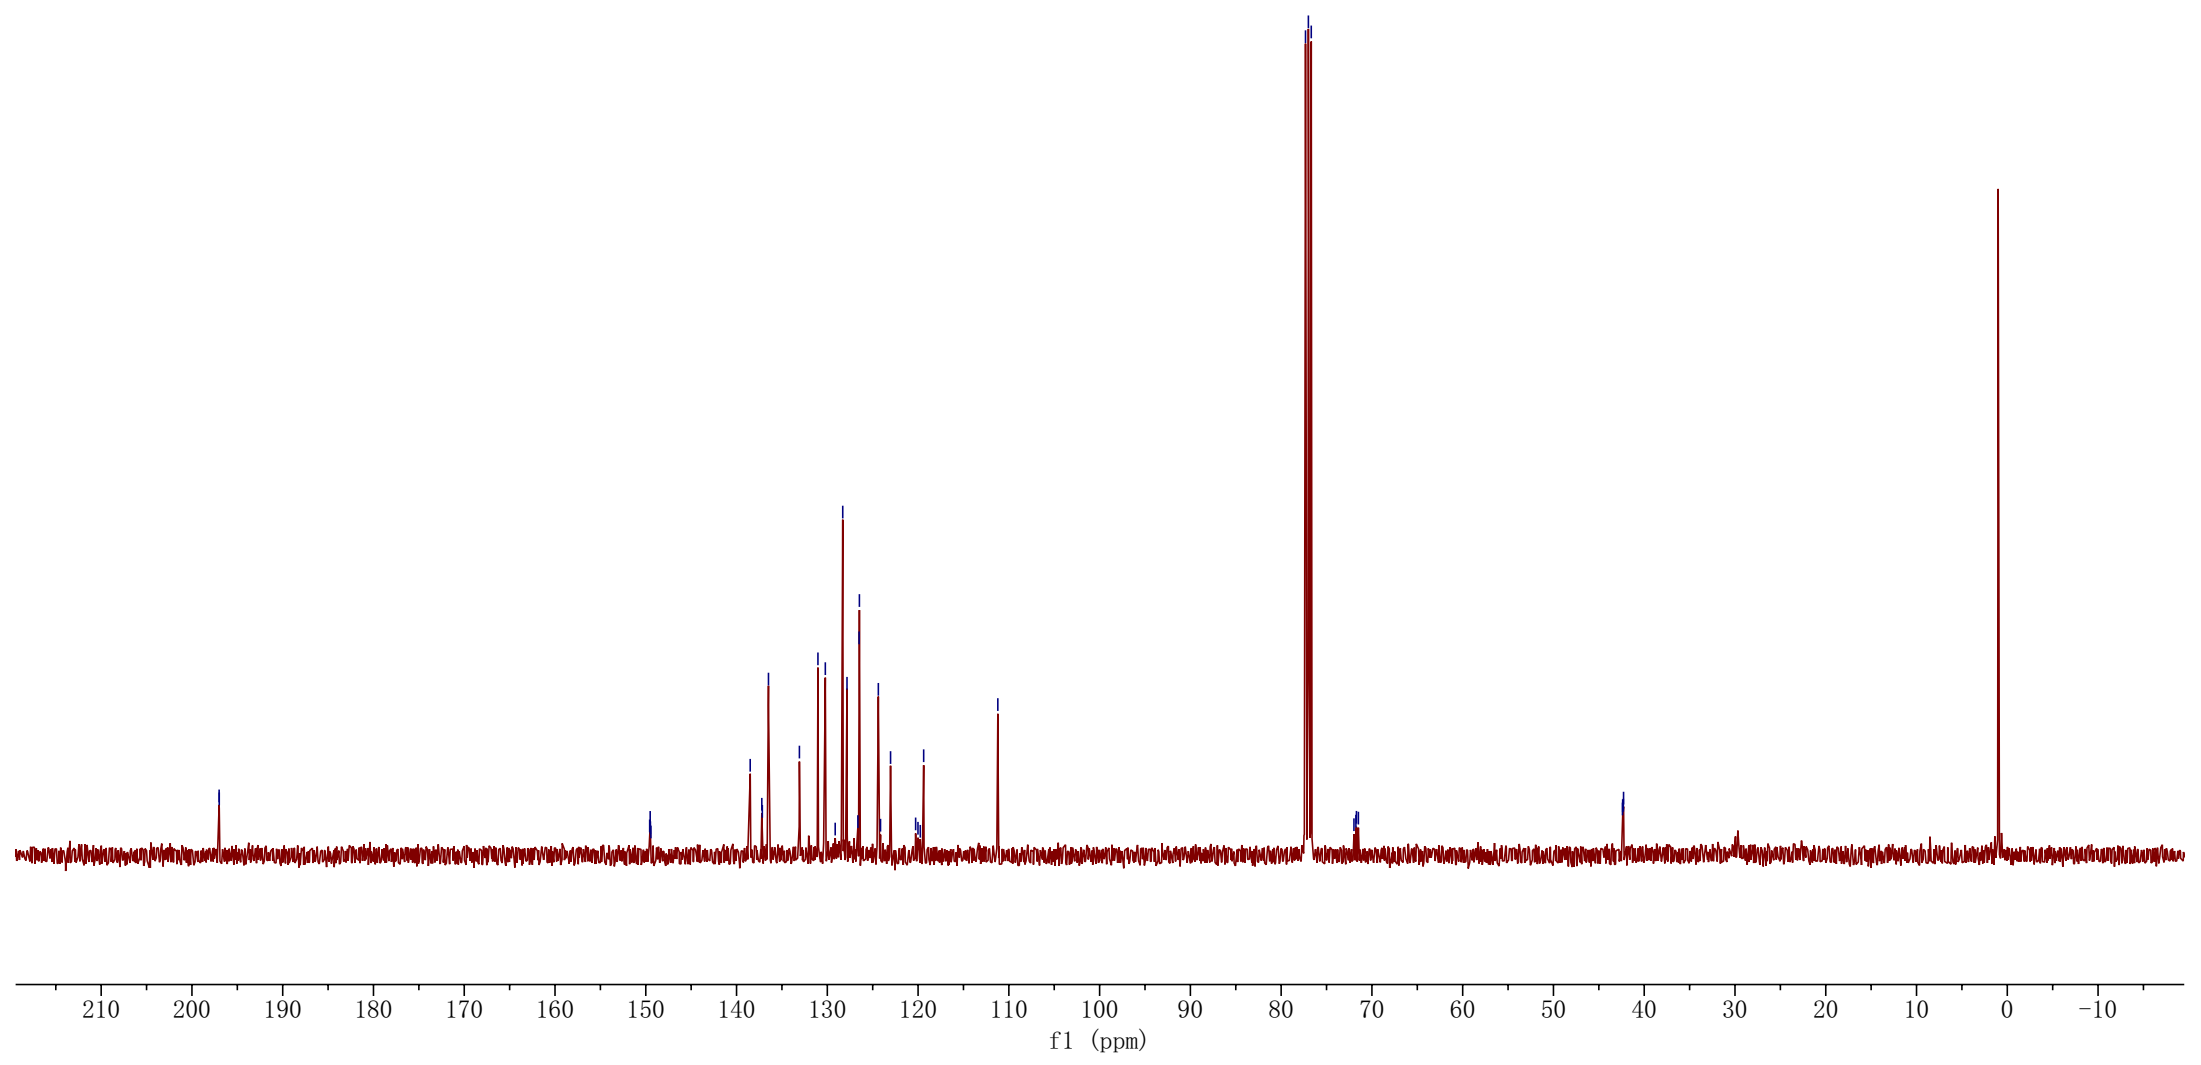

-85.33  
-85.34  
-85.99  
-86.00

-106.48  
-106.49  
-107.13  
-107.15

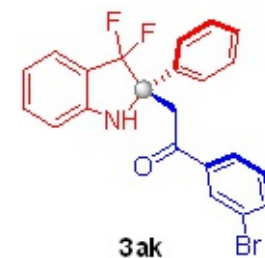

**3ak**  
<sup>19</sup>F NMR (376MHz, CDCl<sub>3</sub>)

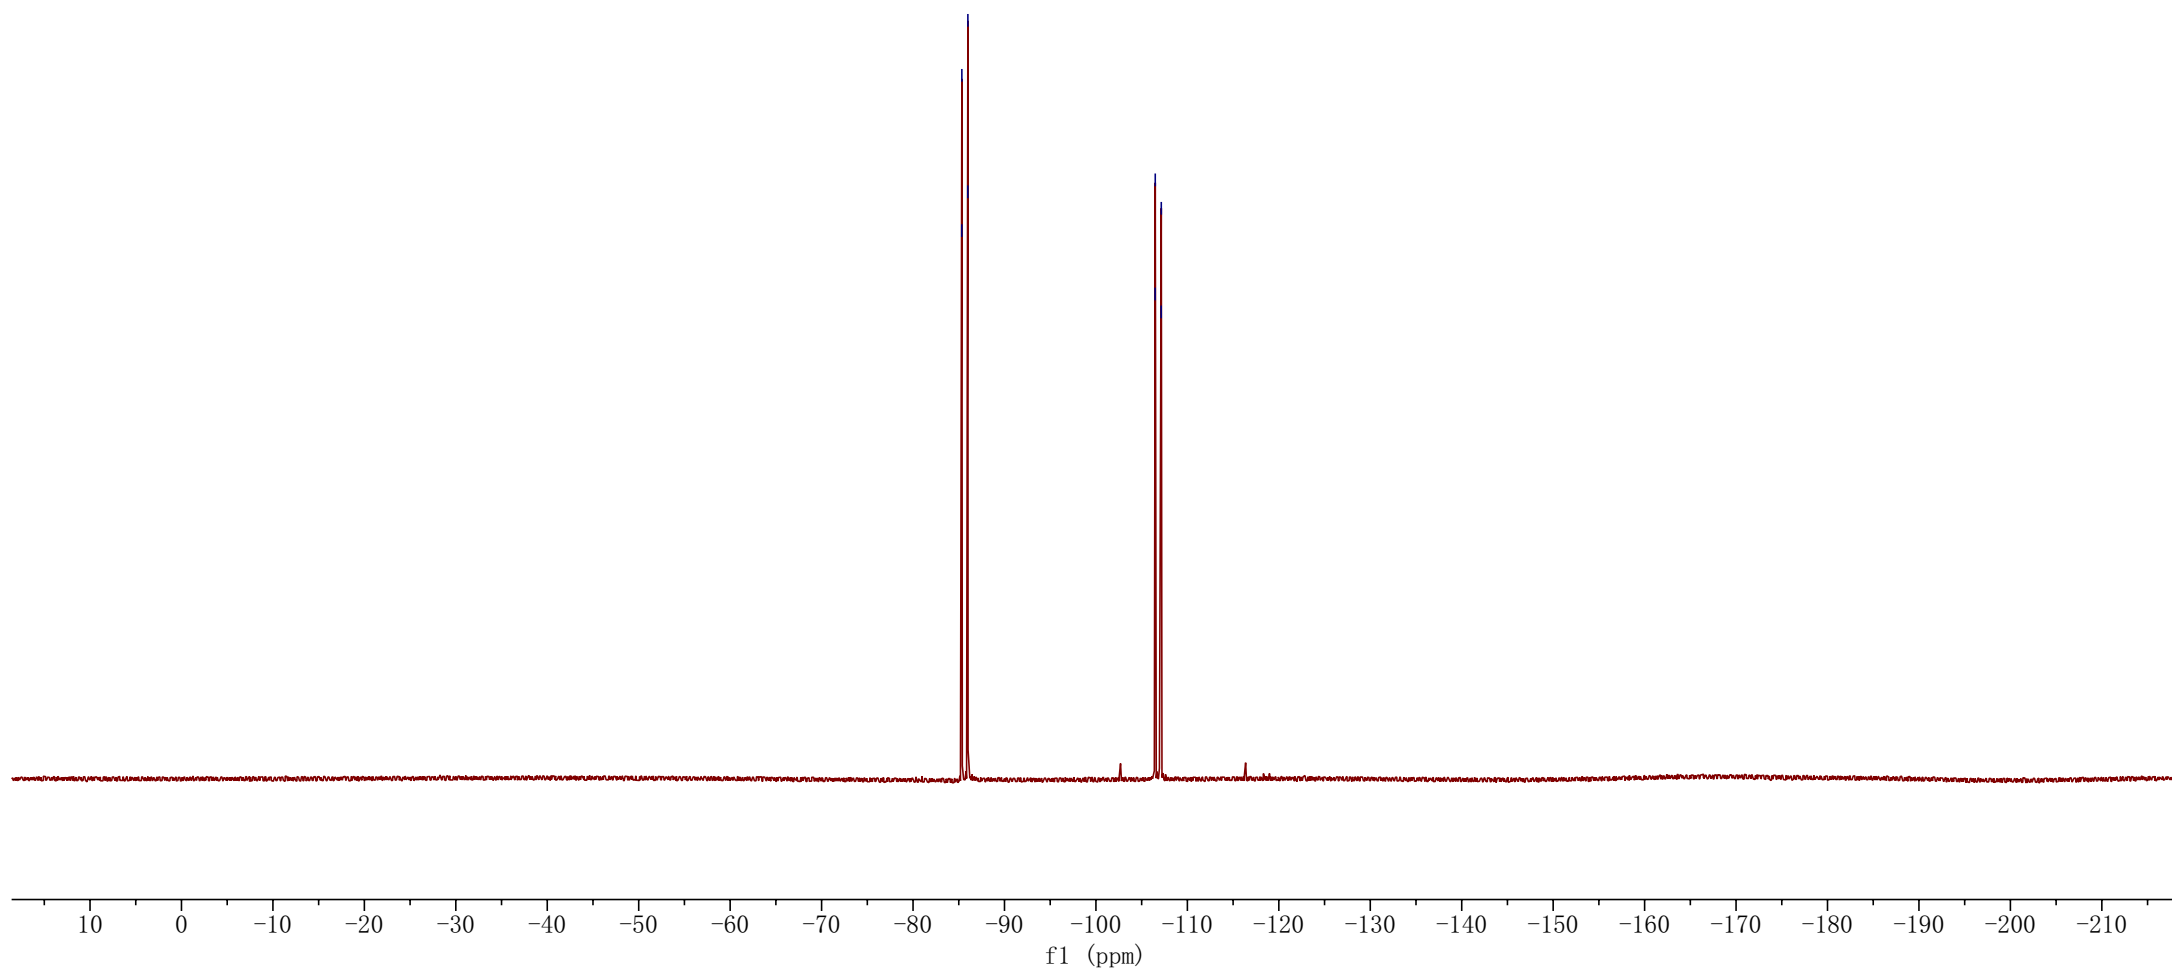

7.688  
7.683  
7.672  
7.667  
7.520  
7.516  
7.498  
7.380  
7.362  
7.275  
7.256  
7.237  
7.217  
7.183  
7.171  
7.166  
7.161  
7.147  
7.130  
7.110  
6.794  
6.775  
6.767  
6.756  
6.747

4.299  
4.295  
4.255  
4.250

3.219  
3.175

—2.291

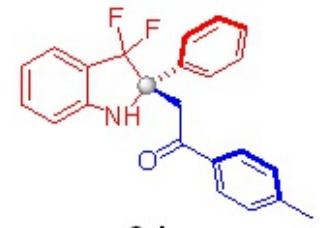

<sup>1</sup>H NMR (400 MHz, CDCl<sub>3</sub>)

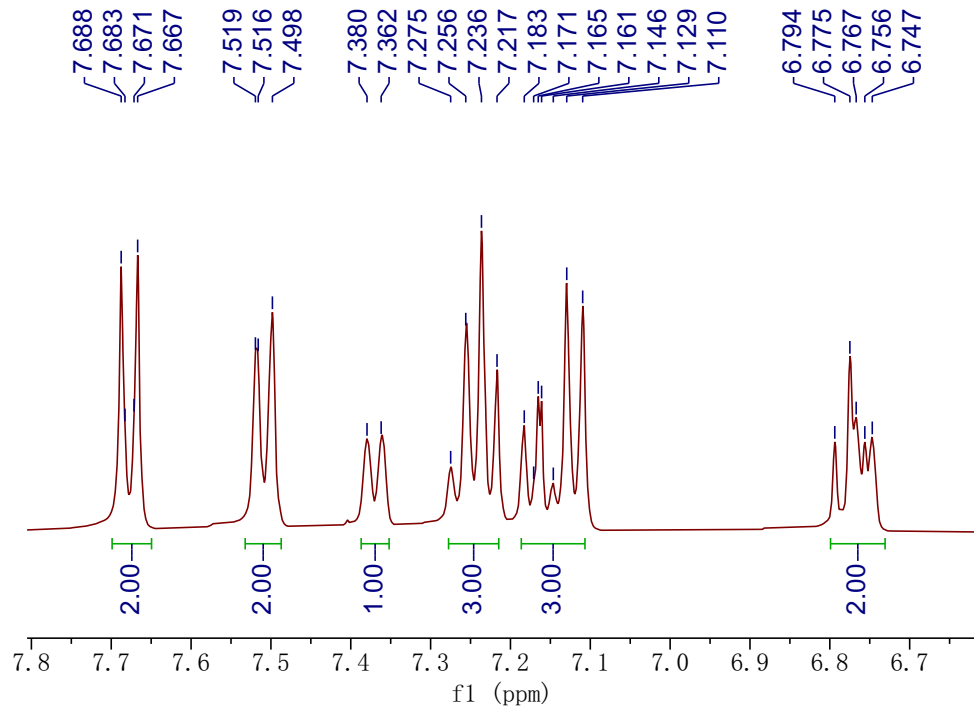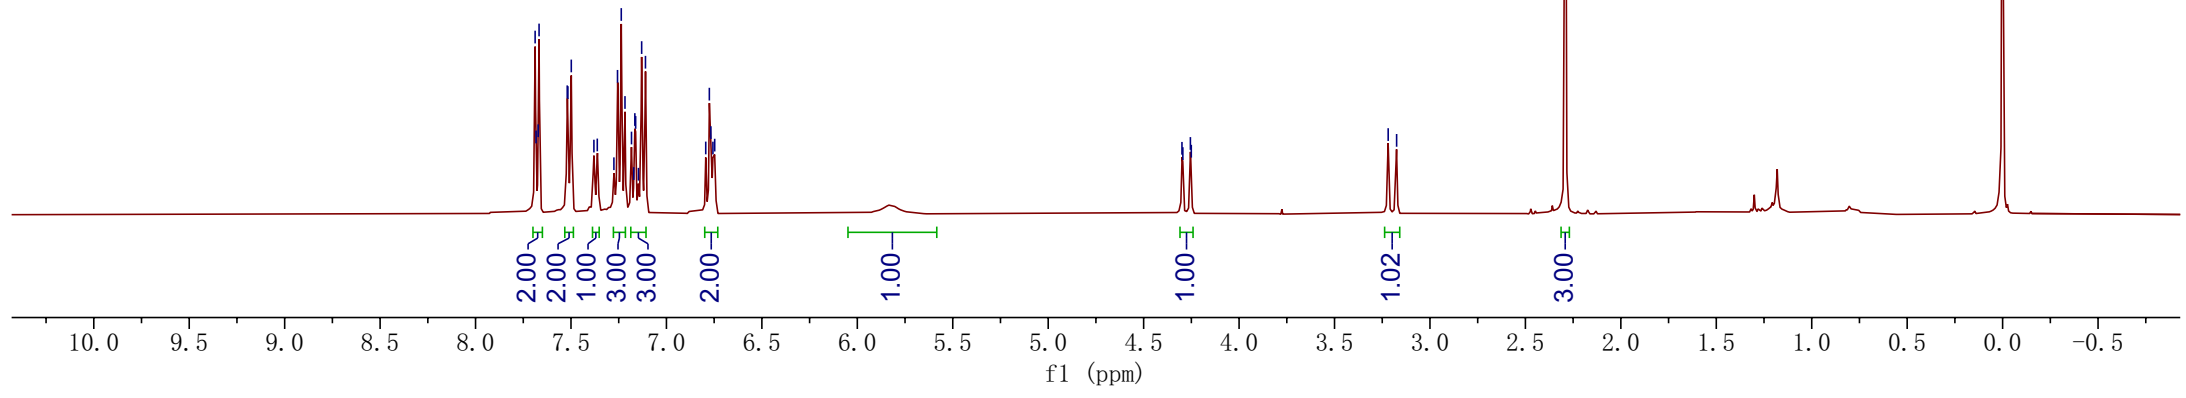

197.88  
197.86  
149.72  
149.66  
149.64  
149.58  
144.64  
137.48  
137.43  
134.39  
132.97  
129.31  
129.25  
128.20  
128.11  
127.66  
126.75  
126.51  
124.31  
124.26  
120.36  
120.11  
120.10  
119.85  
119.18  
111.24

77.32  
77.00  
76.68  
72.09  
71.88  
71.82  
71.60

41.82  
41.80  
41.73  
41.71

21.63

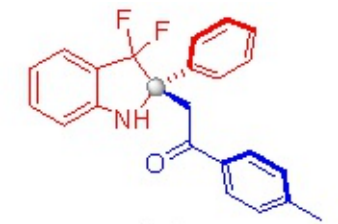

**3aI**  
<sup>13</sup>C NMR (100 MHz, CDCl<sub>3</sub>)

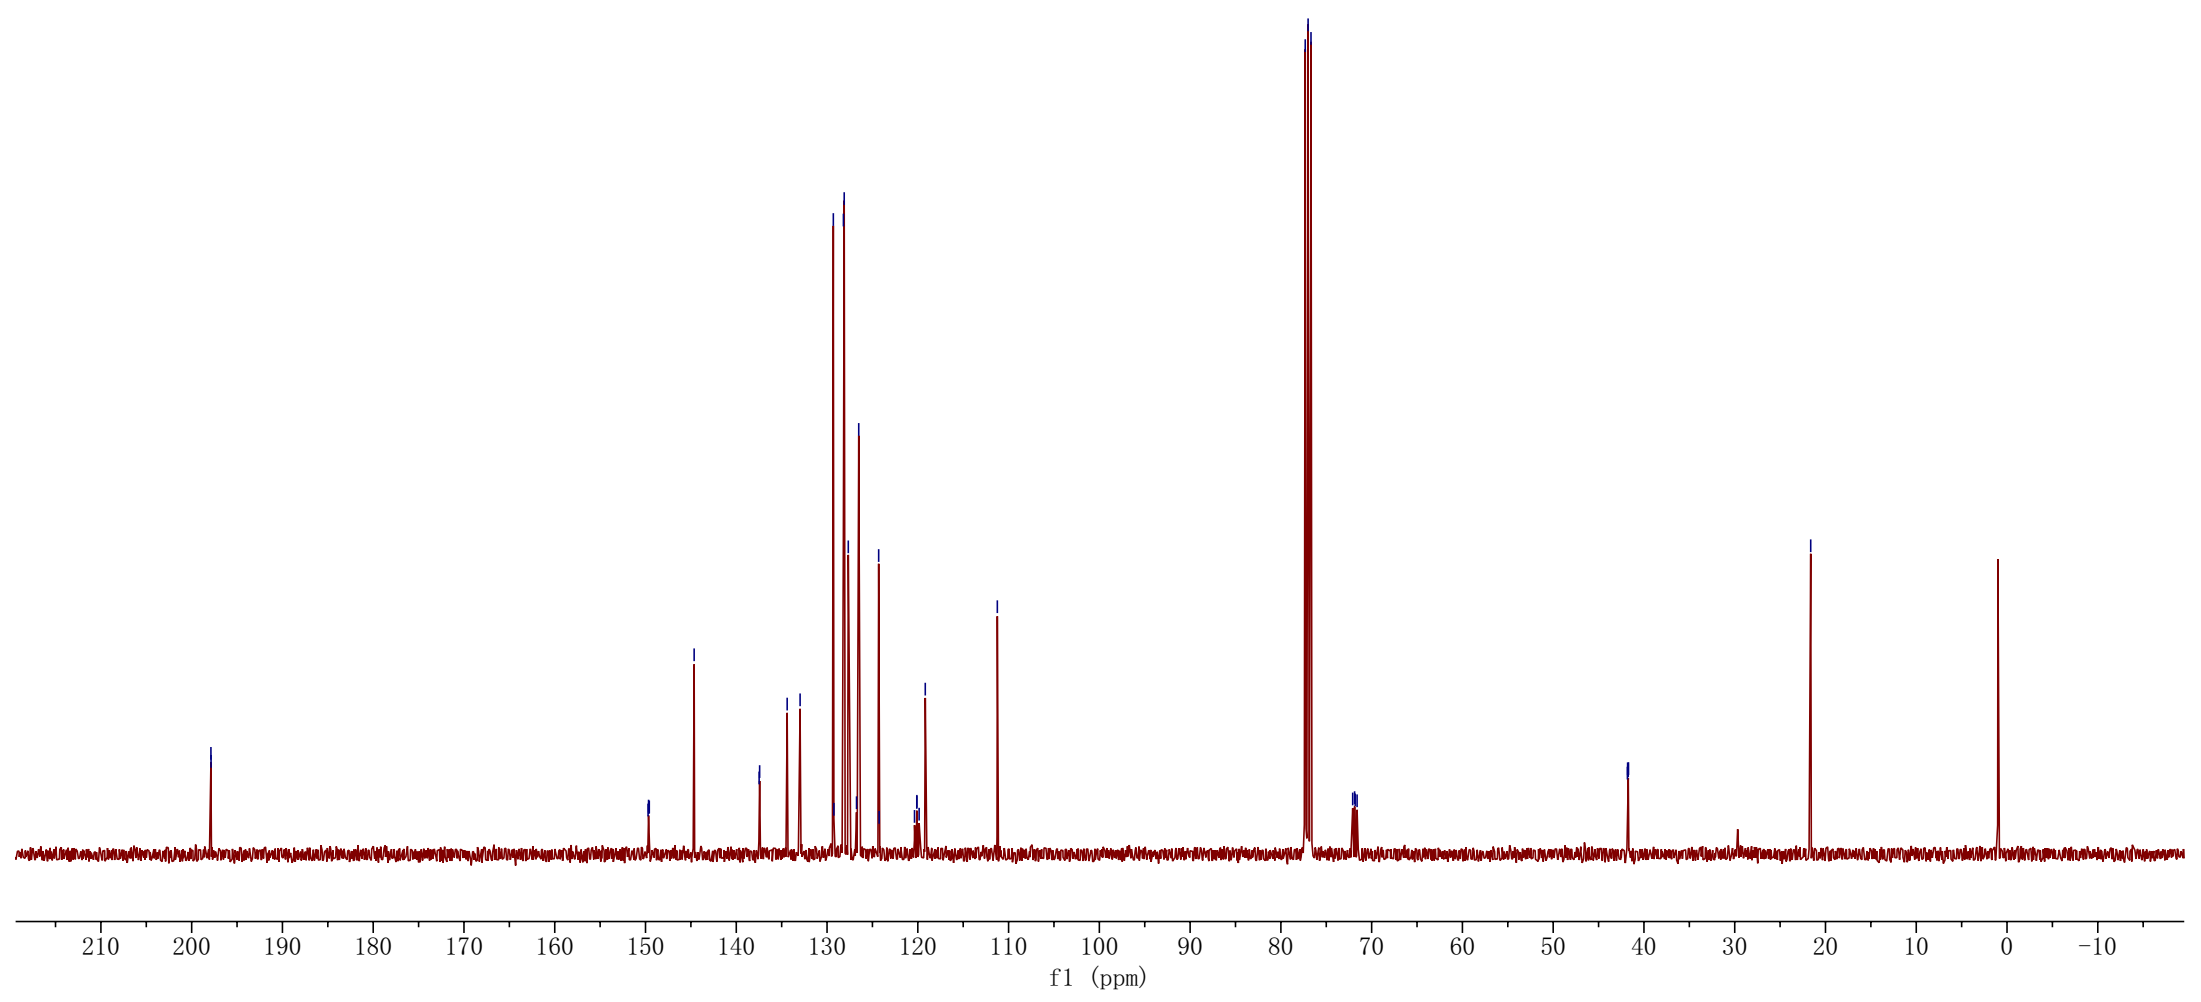

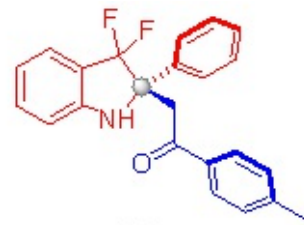

**3al**  
<sup>19</sup>F NMR (376 MHz, CDCl<sub>3</sub>)

-84.81  
-85.47

-107.20  
-107.85

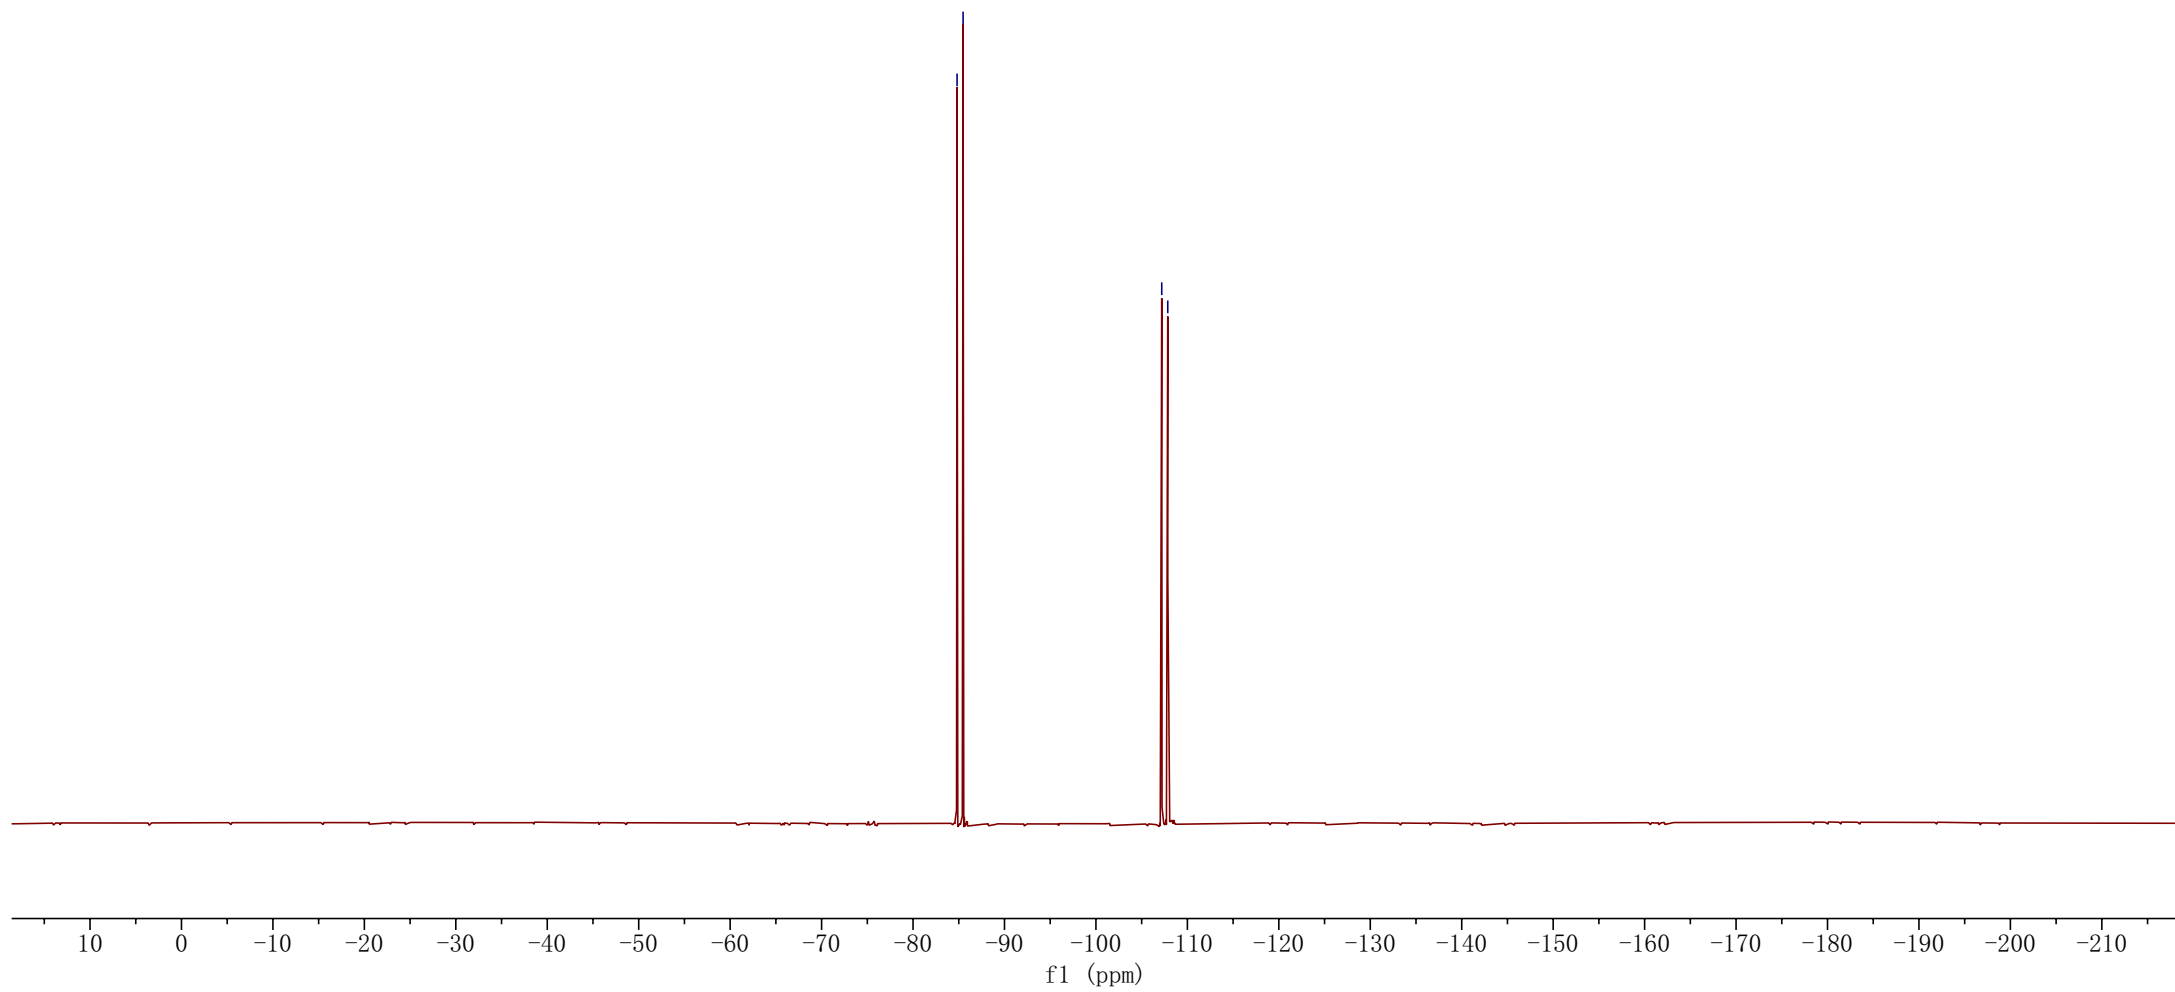

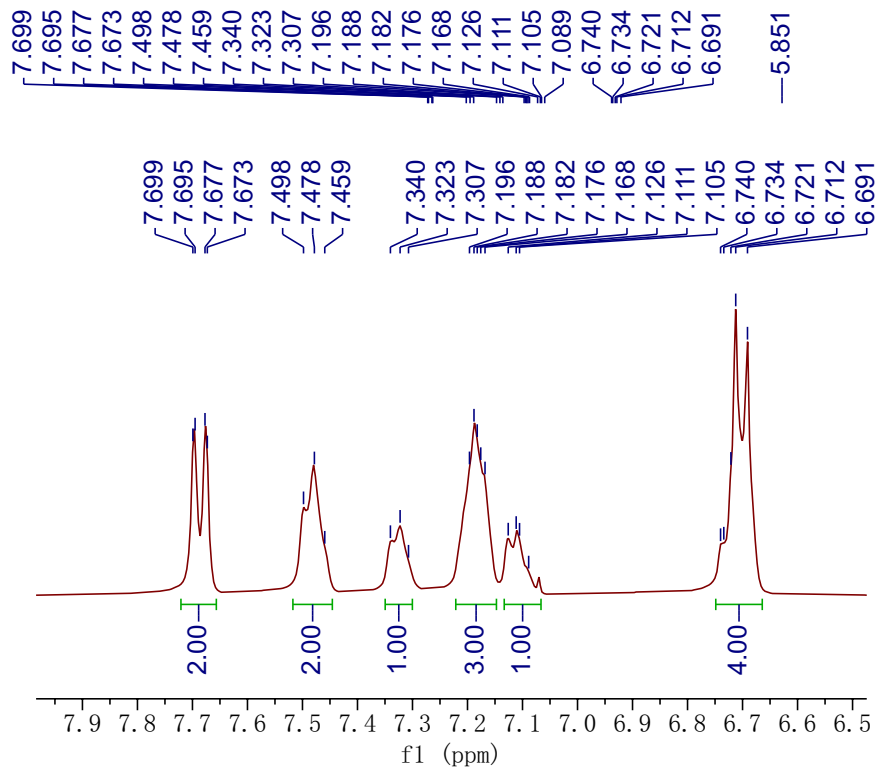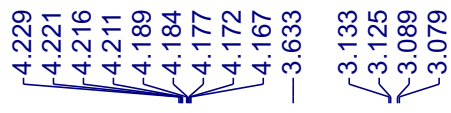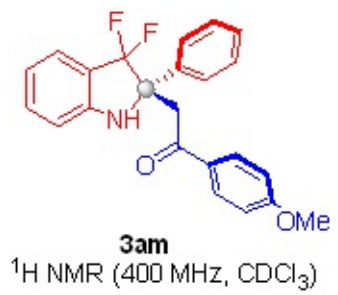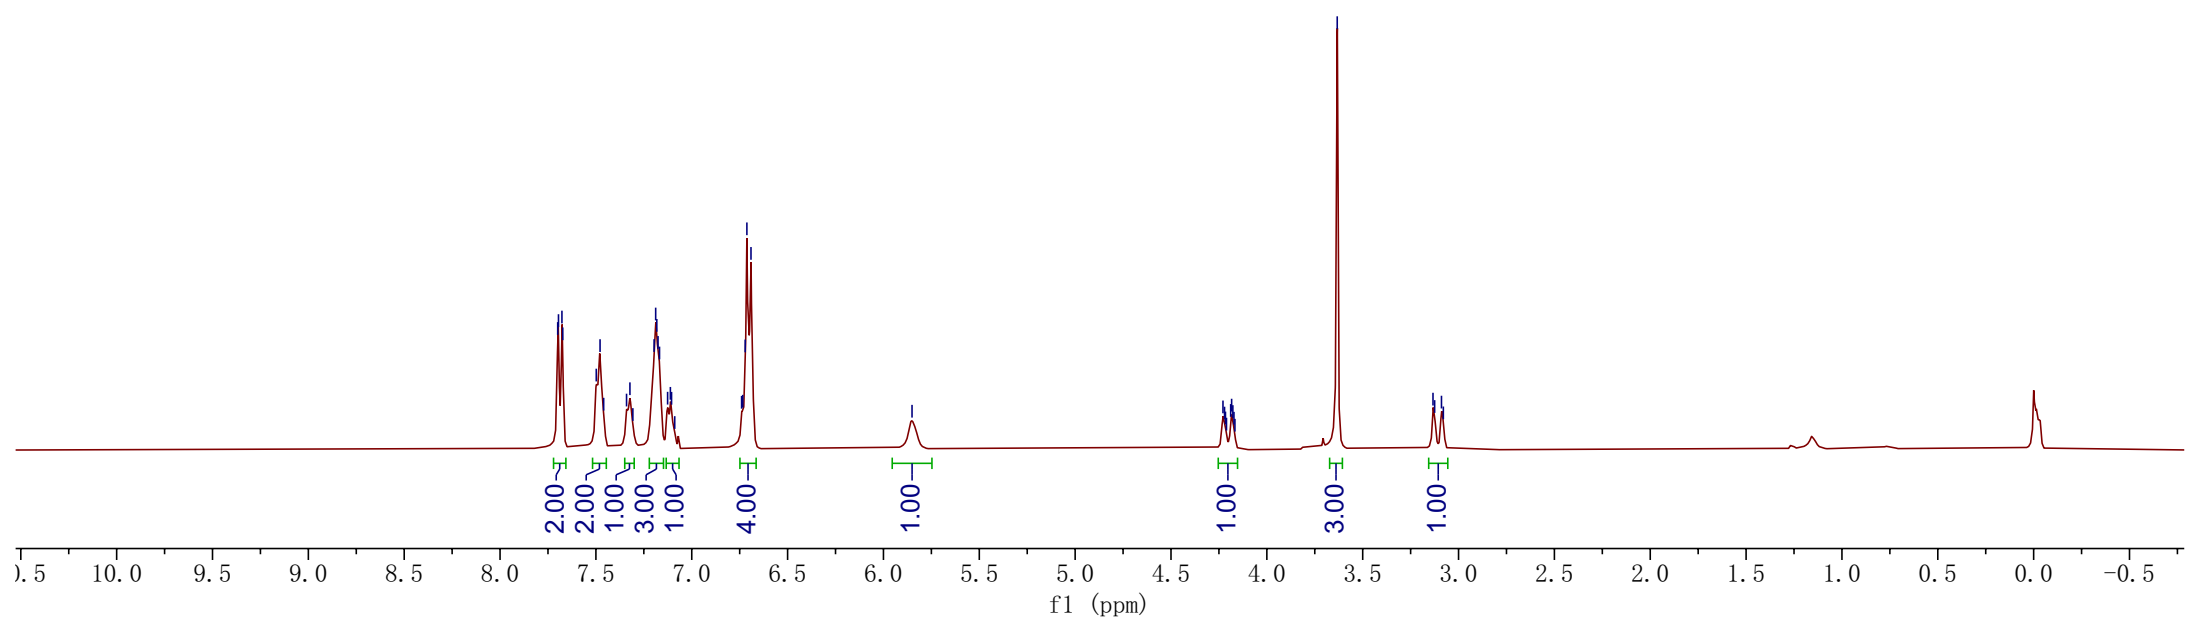

— 196.55

— 163.80

149.69

149.61

149.55

137.50

137.45

132.90

130.27

129.78

129.26

128.10

127.56

126.76

126.45

124.26

124.19

120.28

120.03

119.78

119.08

113.66

111.24

77.31

77.00

76.68

72.07

71.86

71.79

71.58

— 55.33

41.39

41.38

41.31

41.28

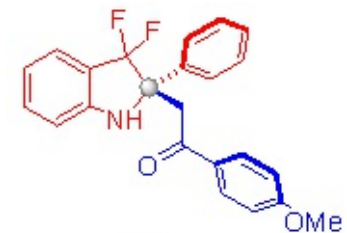

**3am**

<sup>13</sup>C NMR (100 MHz, CDCl<sub>3</sub>)

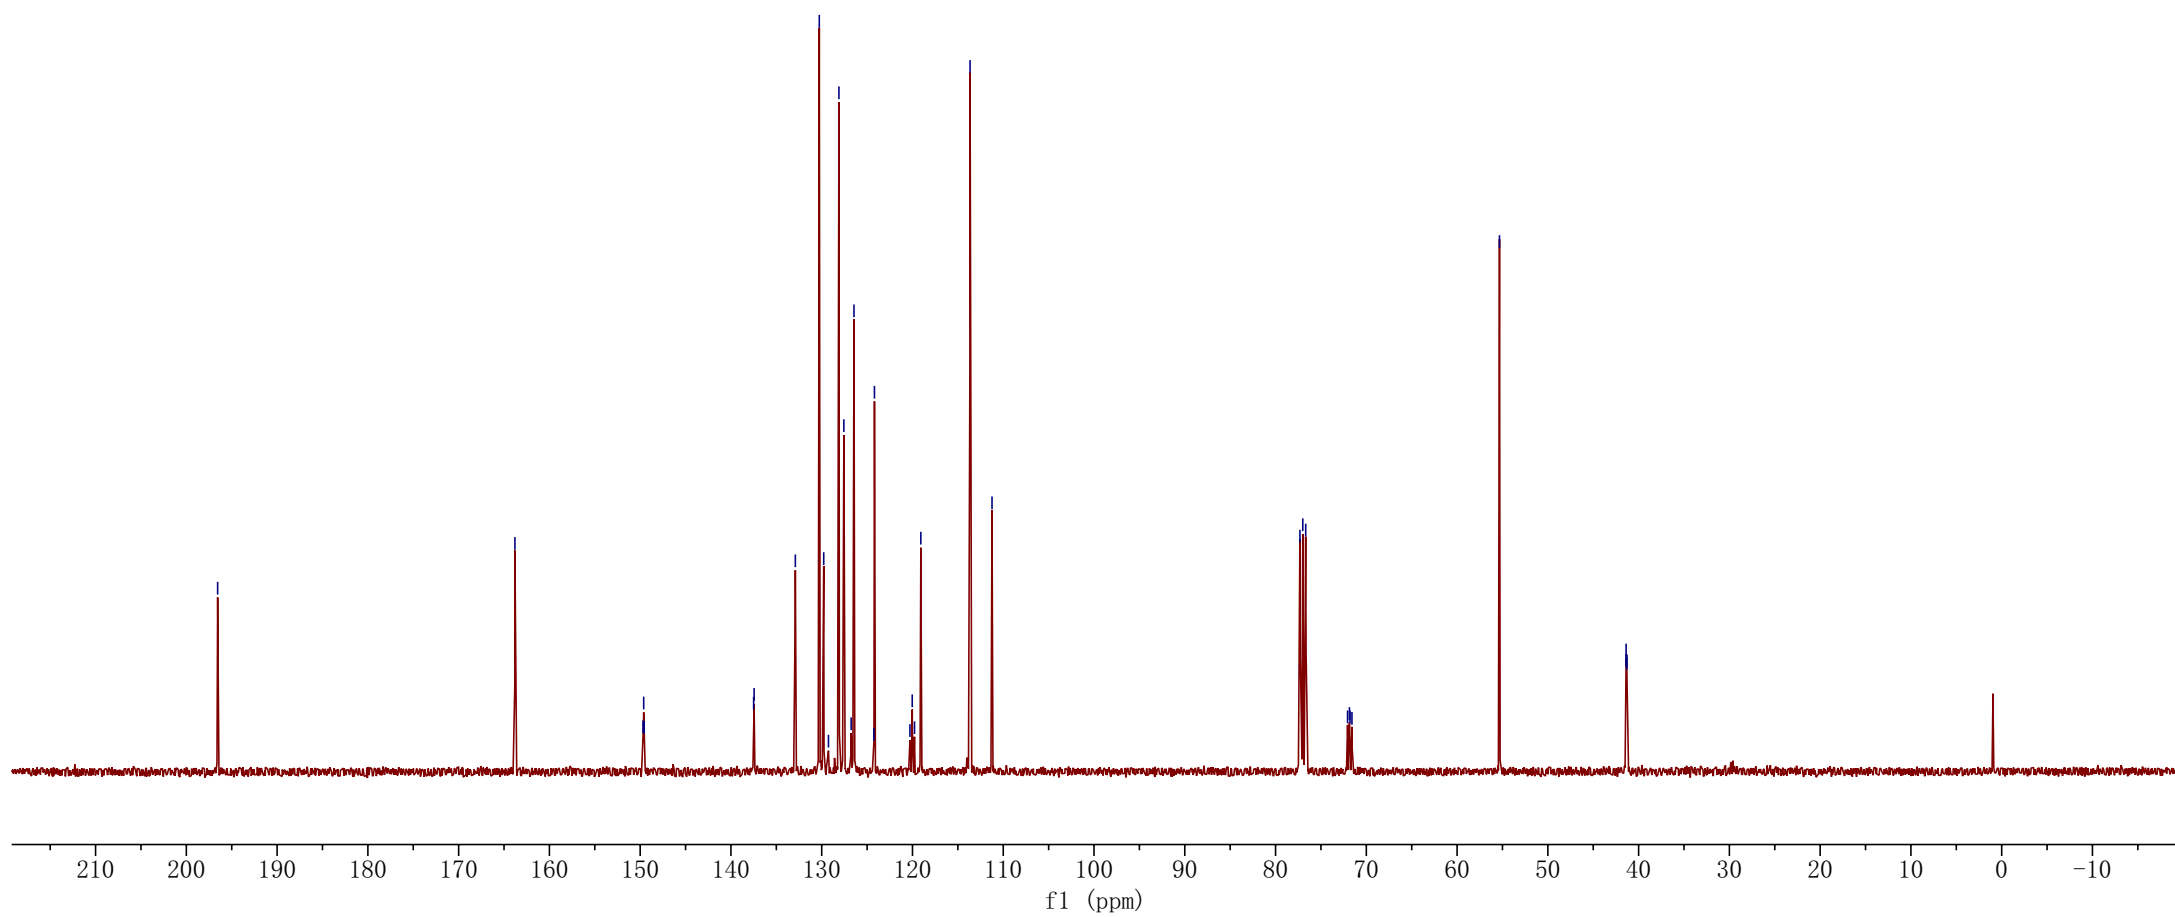

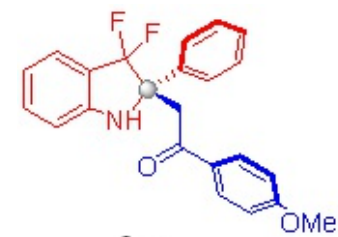

**3am**  
 $^{19}\text{F}$  NMR (376 MHz,  $\text{CDCl}_3$ )

--84.30  
--84.96

--107.25  
--107.91

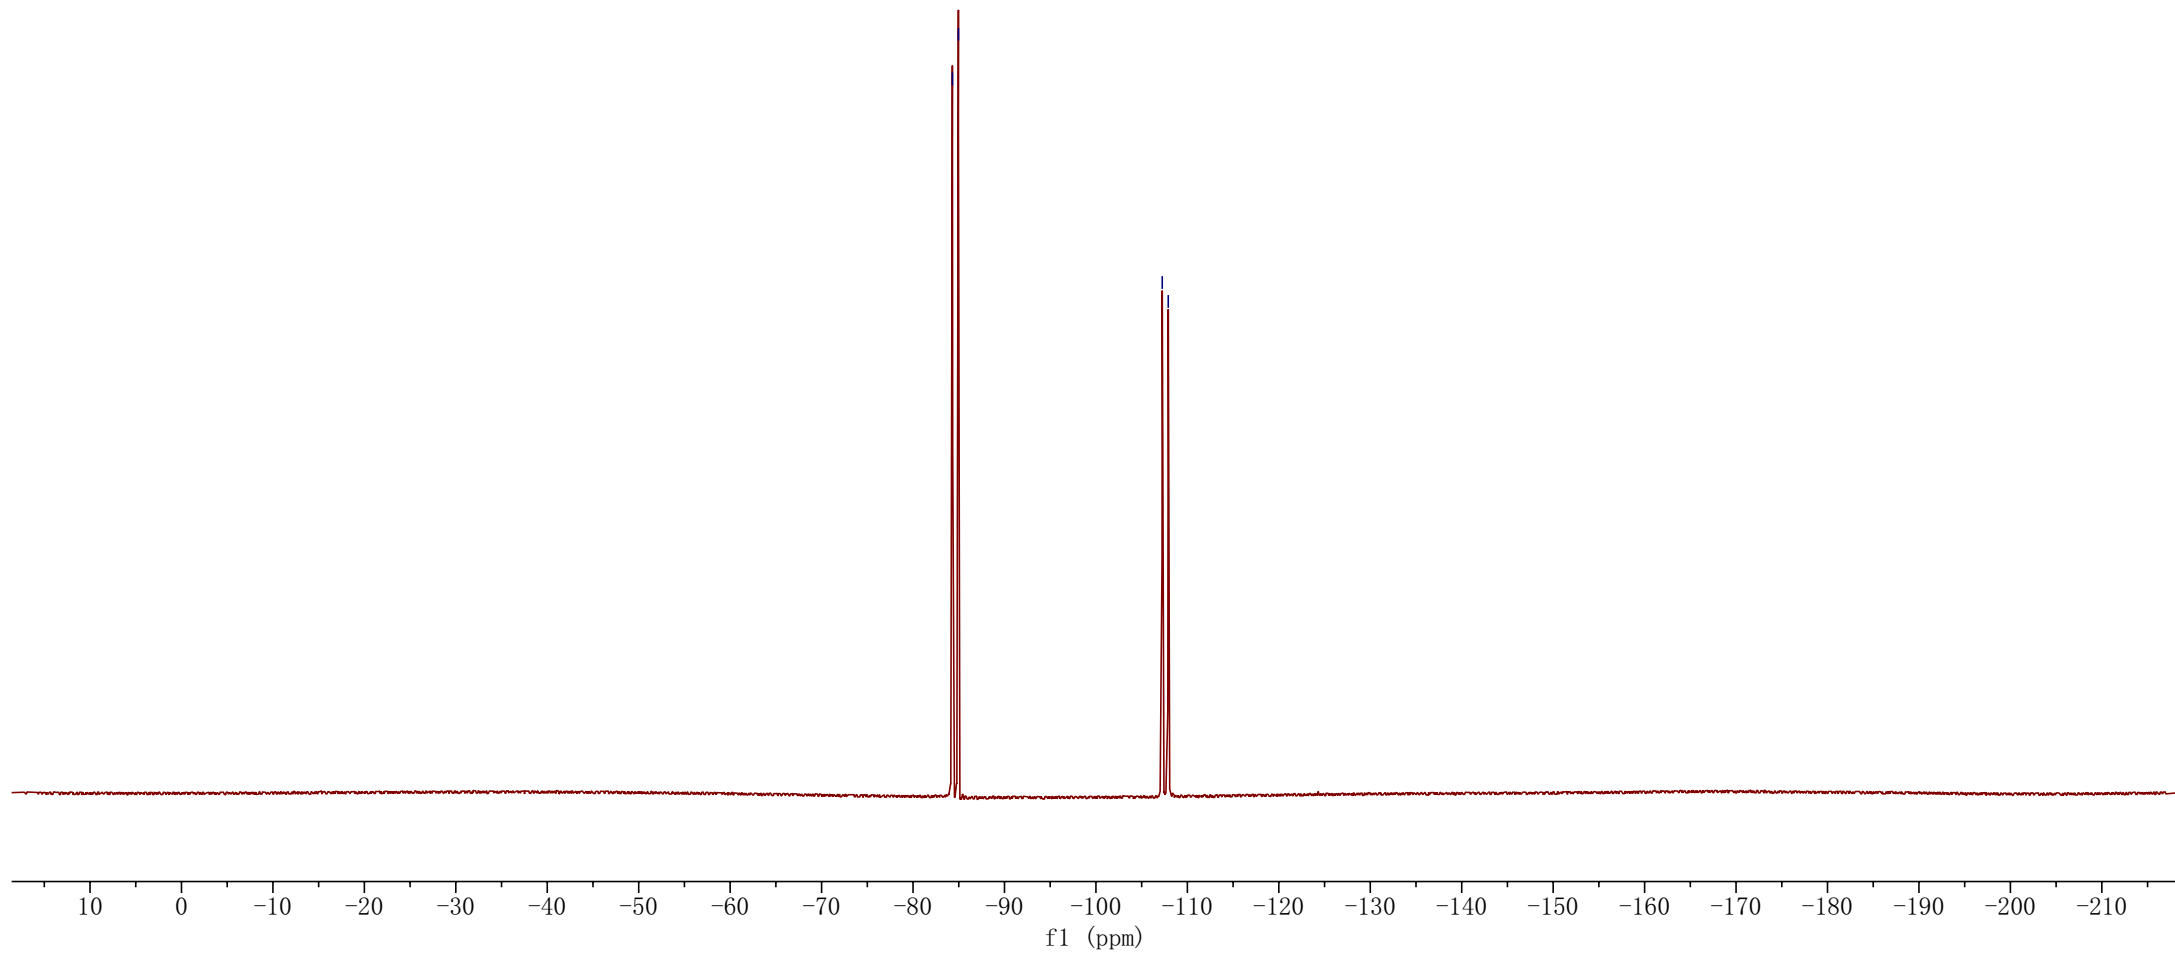



7.912  
7.899  
7.891  
7.877  
7.607  
7.601  
7.588  
7.582  
7.480  
7.461  
7.381  
7.361  
7.342  
7.324  
7.292  
7.274  
7.260  
7.108  
7.087  
7.065  
6.902  
6.883  
6.871  
6.864  
6.851  
5.853

7.912  
7.899  
7.891  
7.877

7.607  
7.601  
7.588  
7.582

7.480  
7.461  
7.381  
7.361

7.342  
7.324  
7.292  
7.274

7.260  
7.108  
7.087  
7.065

6.902  
6.883  
6.871  
6.864  
6.851

4.372  
4.327

3.329  
3.285

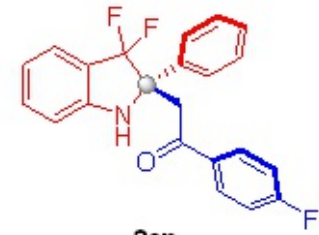

**3an**

<sup>1</sup>H NMR (400 MHz, CDCl<sub>3</sub>)

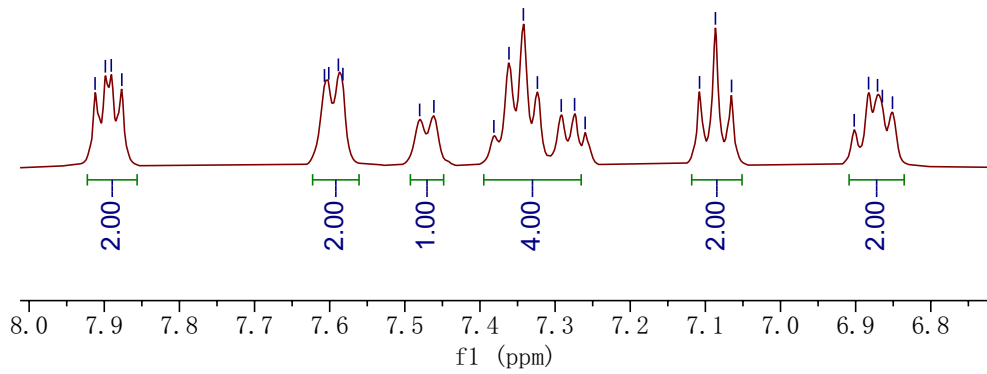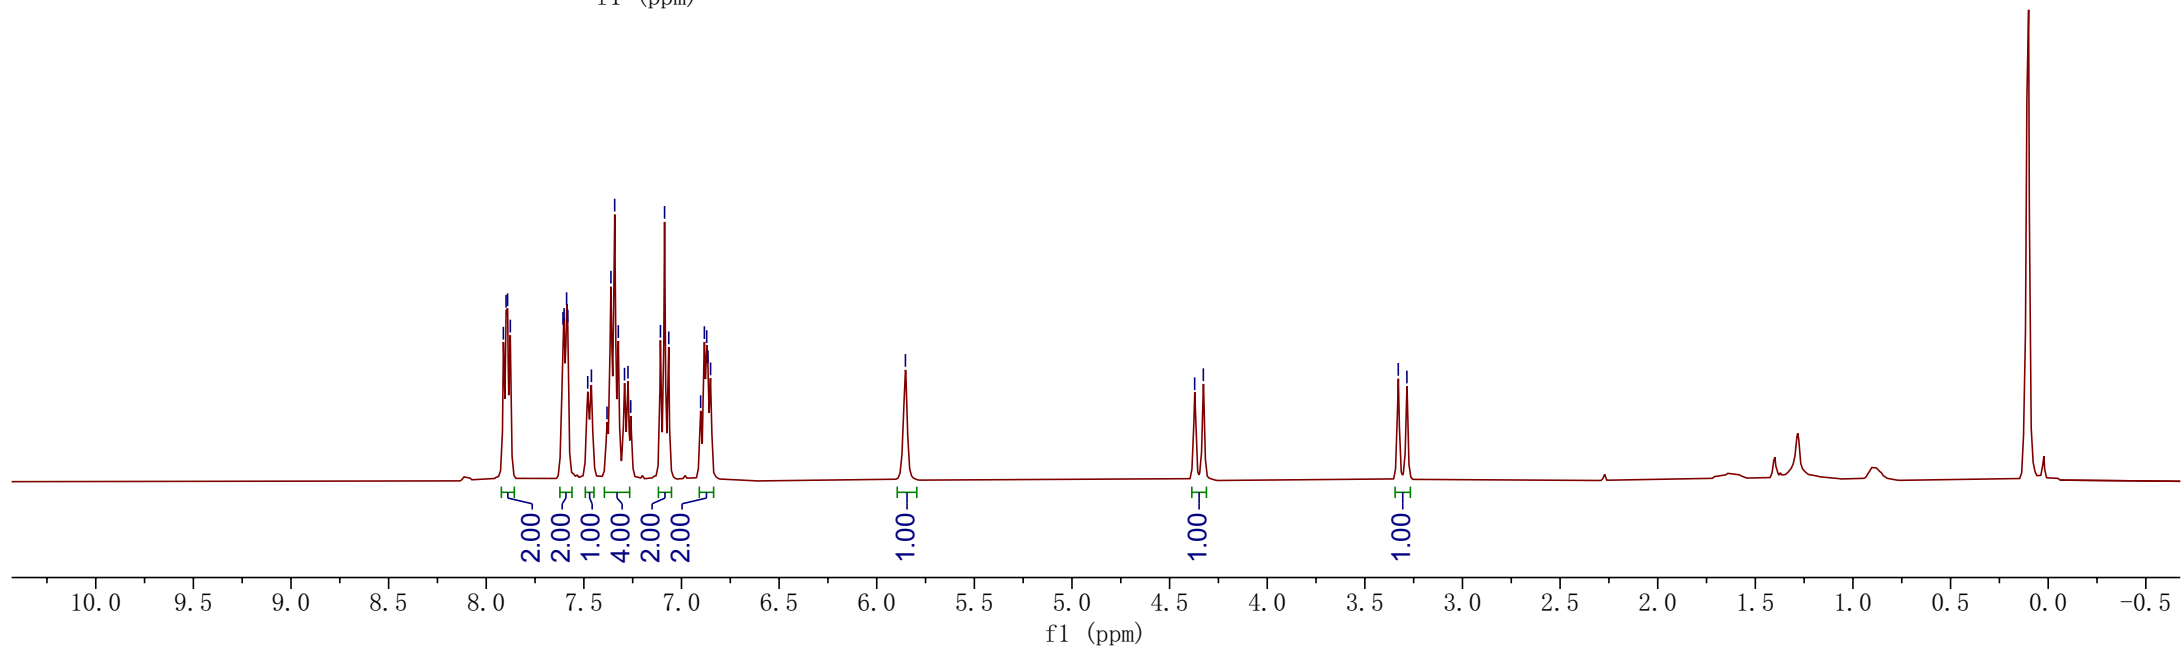

196.70  
196.68

167.27  
164.72

149.62  
149.56  
149.54  
149.48

137.33  
137.28

133.27  
133.24  
133.03

130.75  
130.65  
129.18  
128.25  
127.75

126.69  
126.45  
124.33  
124.19

120.27  
120.02  
119.77  
119.30

115.88  
115.66  
111.23

77.32  
77.00  
76.68

72.01  
71.80  
71.73  
71.52

42.02  
41.99  
41.92  
41.90

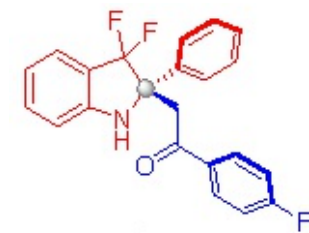

**3an**

<sup>13</sup>C NMR (100 MHz, CDCl<sub>3</sub>)

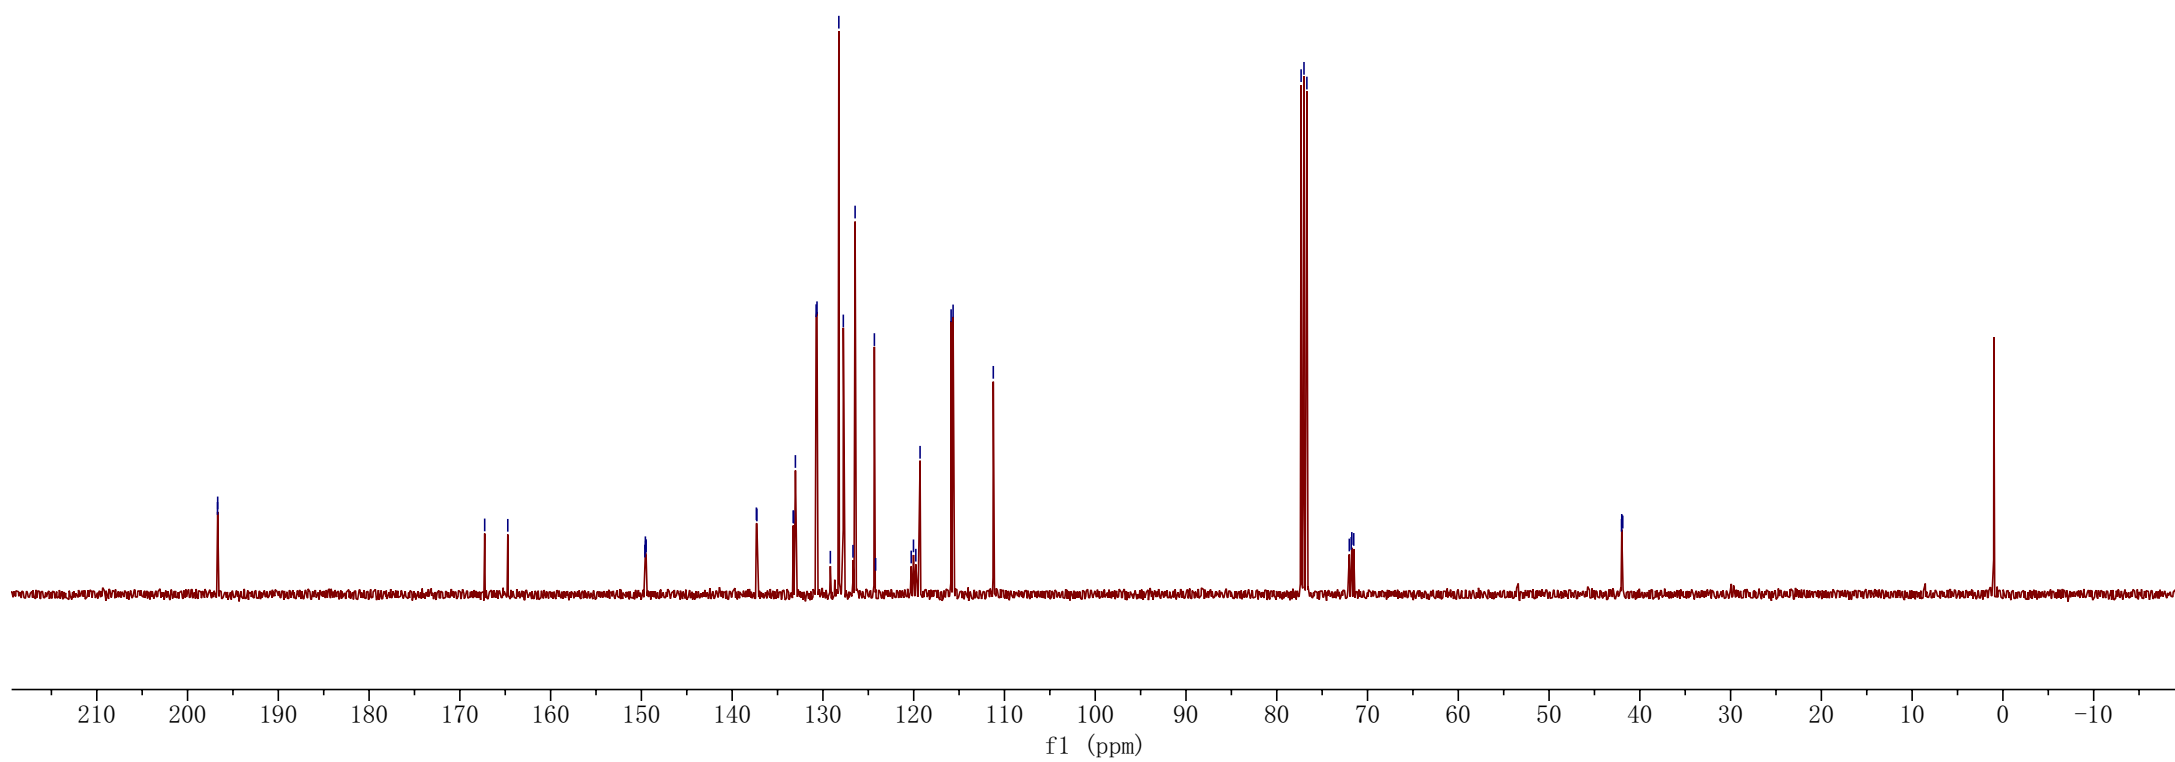

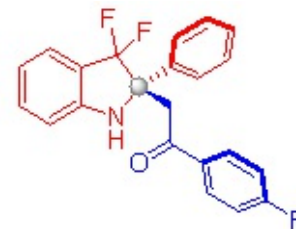

<sup>19</sup>F NMR (376 MHz, CDCl<sub>3</sub>)

-85.04  
-85.70

-103.80  
-106.70  
-107.36

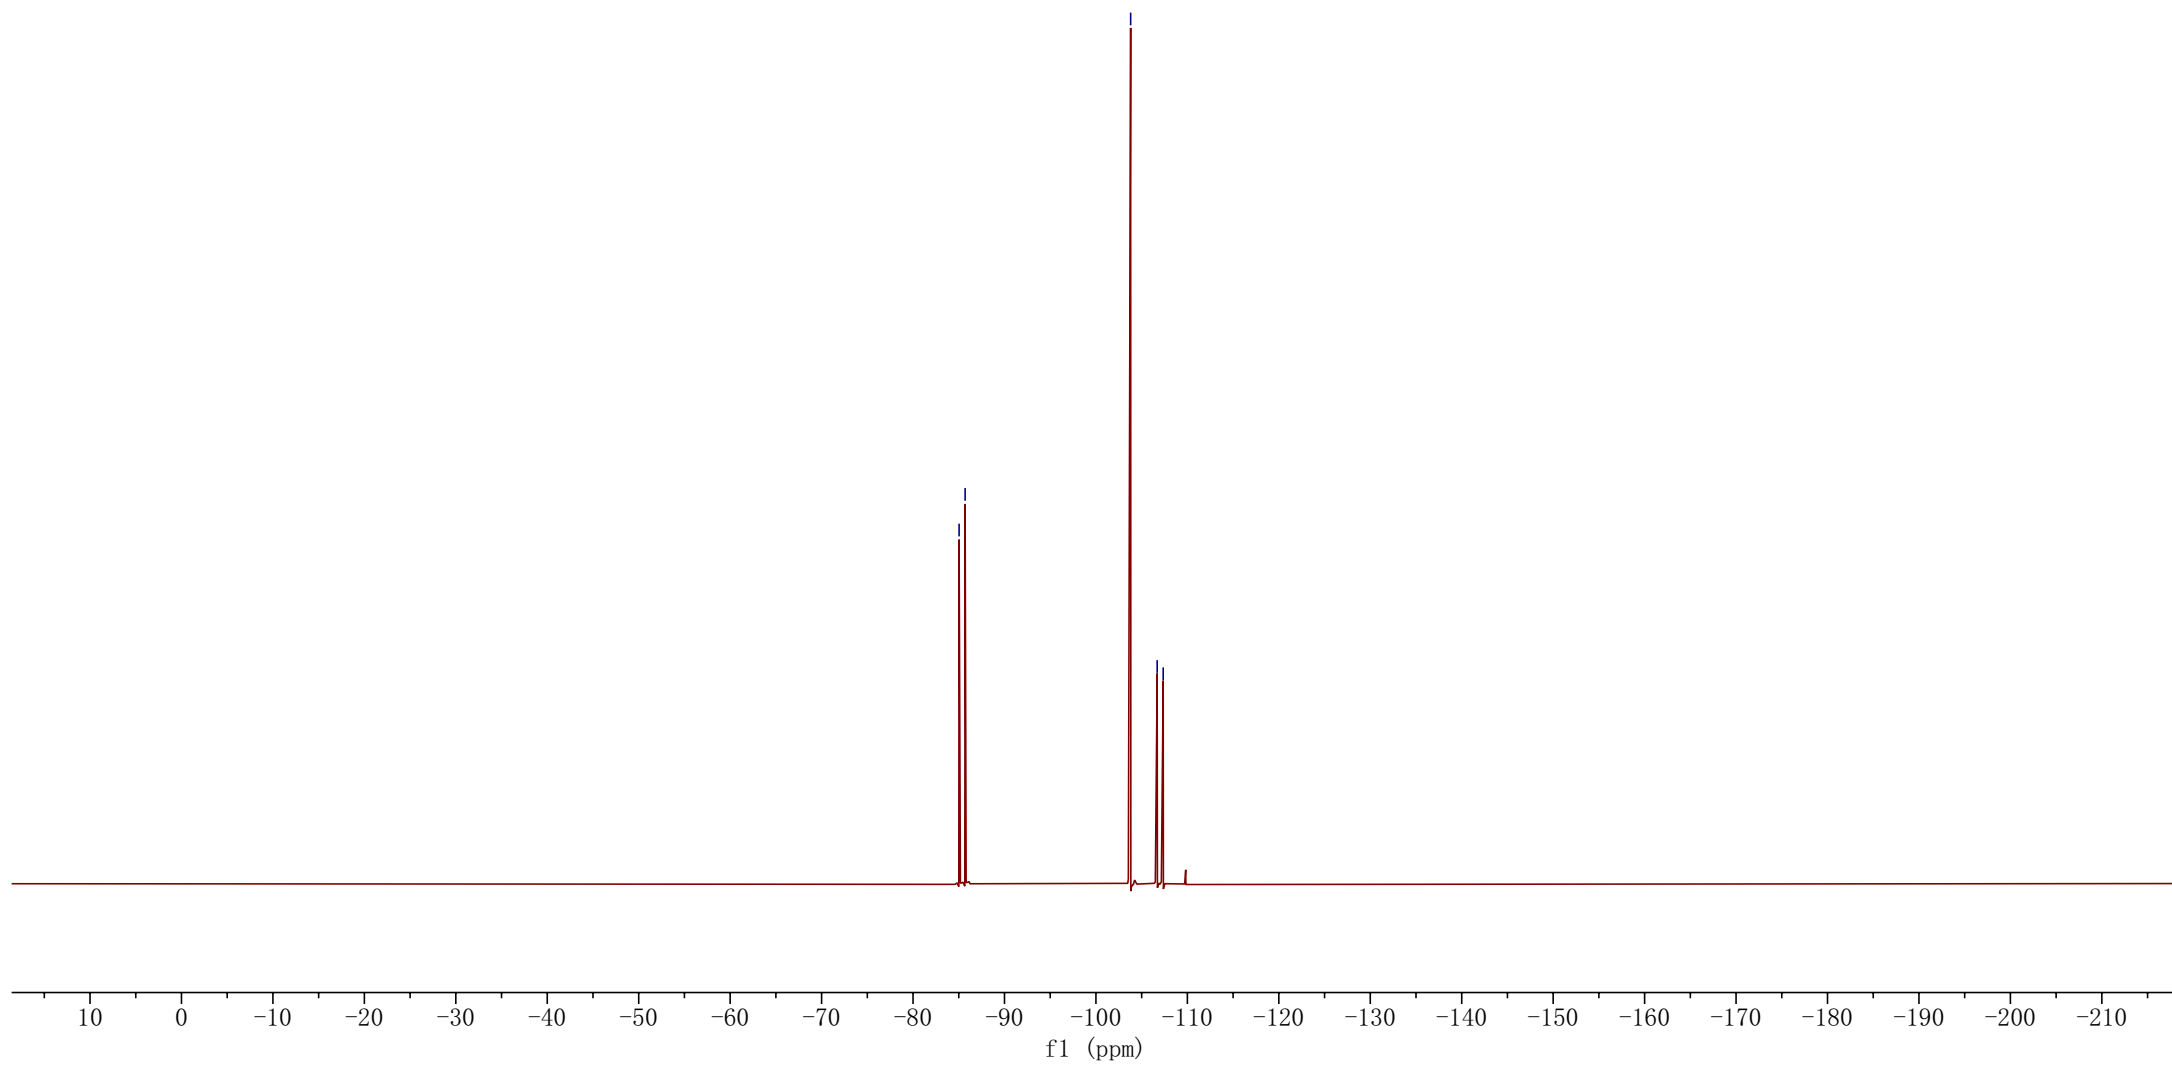

7.806  
7.801  
7.790  
7.785  
7.598  
7.579  
7.498  
7.478  
7.461  
7.432  
7.399  
7.382  
7.378  
7.362  
7.342  
7.322  
7.293  
7.275  
7.260  
6.903  
6.885  
6.868  
6.851  
5.834  
4.363  
4.319  
3.325  
3.281

7.806  
7.801  
7.790  
7.785  
7.598  
7.579  
7.498  
7.478  
7.461  
7.432  
7.399  
7.382  
7.378  
7.362  
7.342  
7.322  
7.293  
7.275  
7.260  
6.903  
6.885  
6.868  
6.851

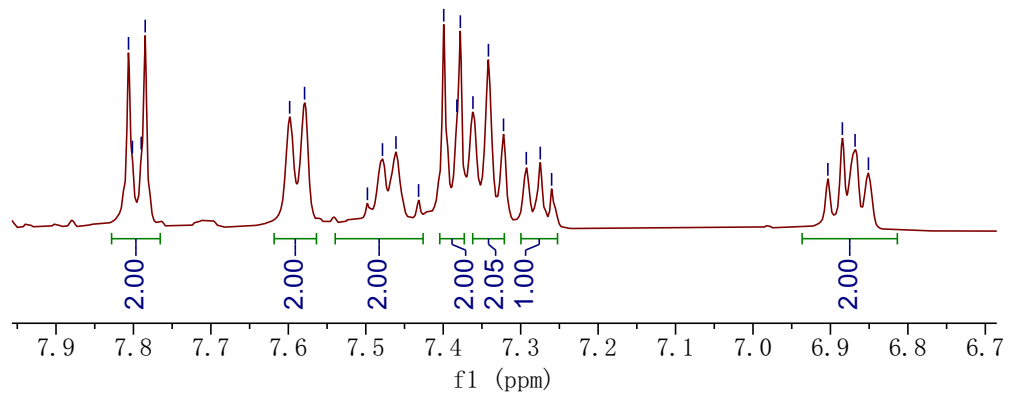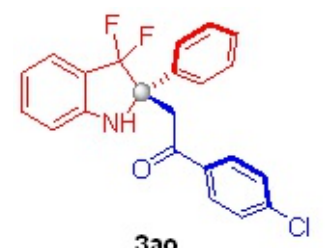

**3ao**  
<sup>1</sup>H NMR (400 MHz, CDCl<sub>3</sub>)

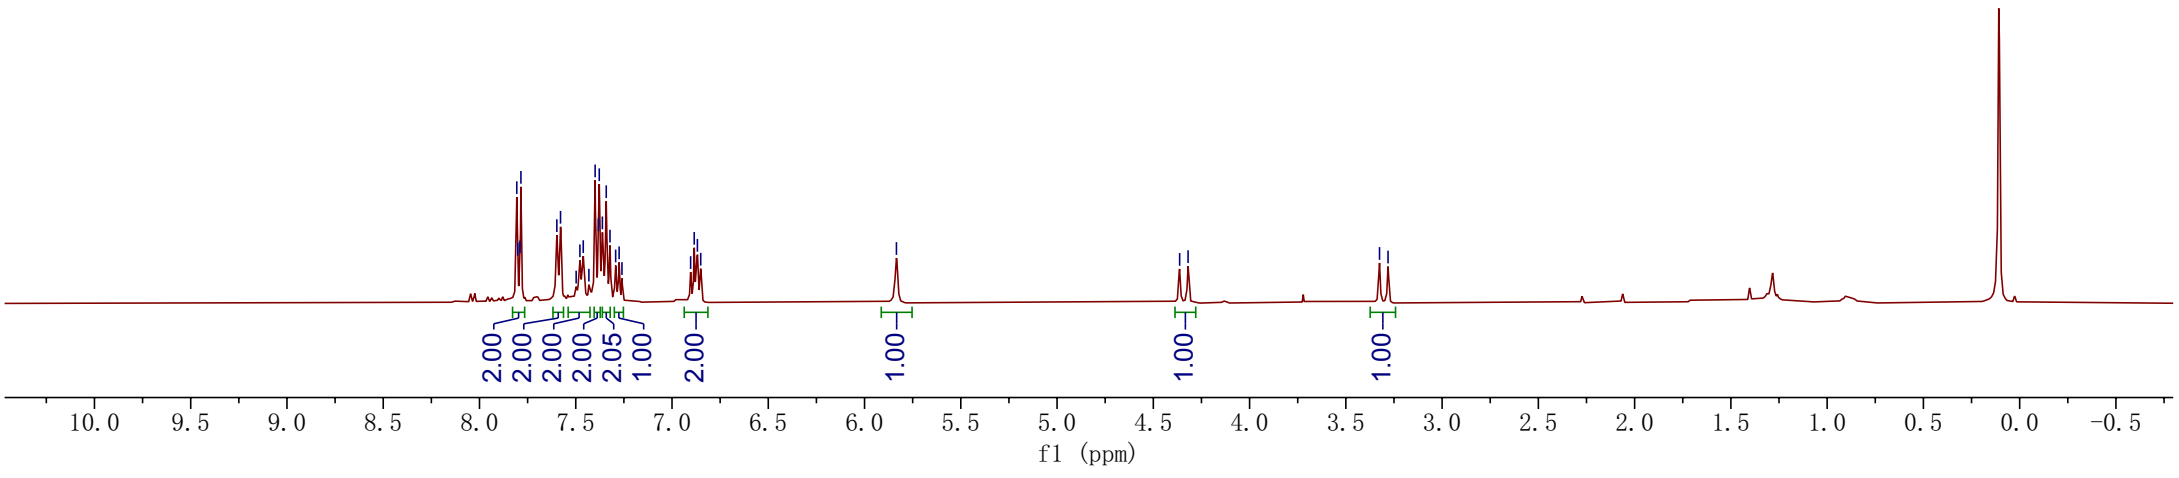

197.11  
197.10  
149.58  
149.52  
149.50  
149.44  
140.19  
137.27  
137.21  
135.09  
133.04  
129.37  
129.15  
128.94  
128.26  
127.78  
126.65  
126.44  
124.34  
124.16  
120.24  
119.99  
119.74  
119.32  
111.22

77.32  
77.00  
76.68  
71.99  
71.77  
71.71  
71.50

42.09  
42.07  
42.00  
41.97

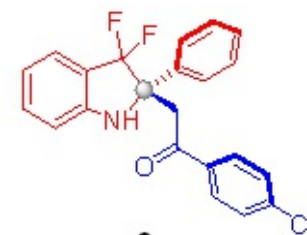

<sup>13</sup>C NMR (100 MHz, CDCl<sub>3</sub>)

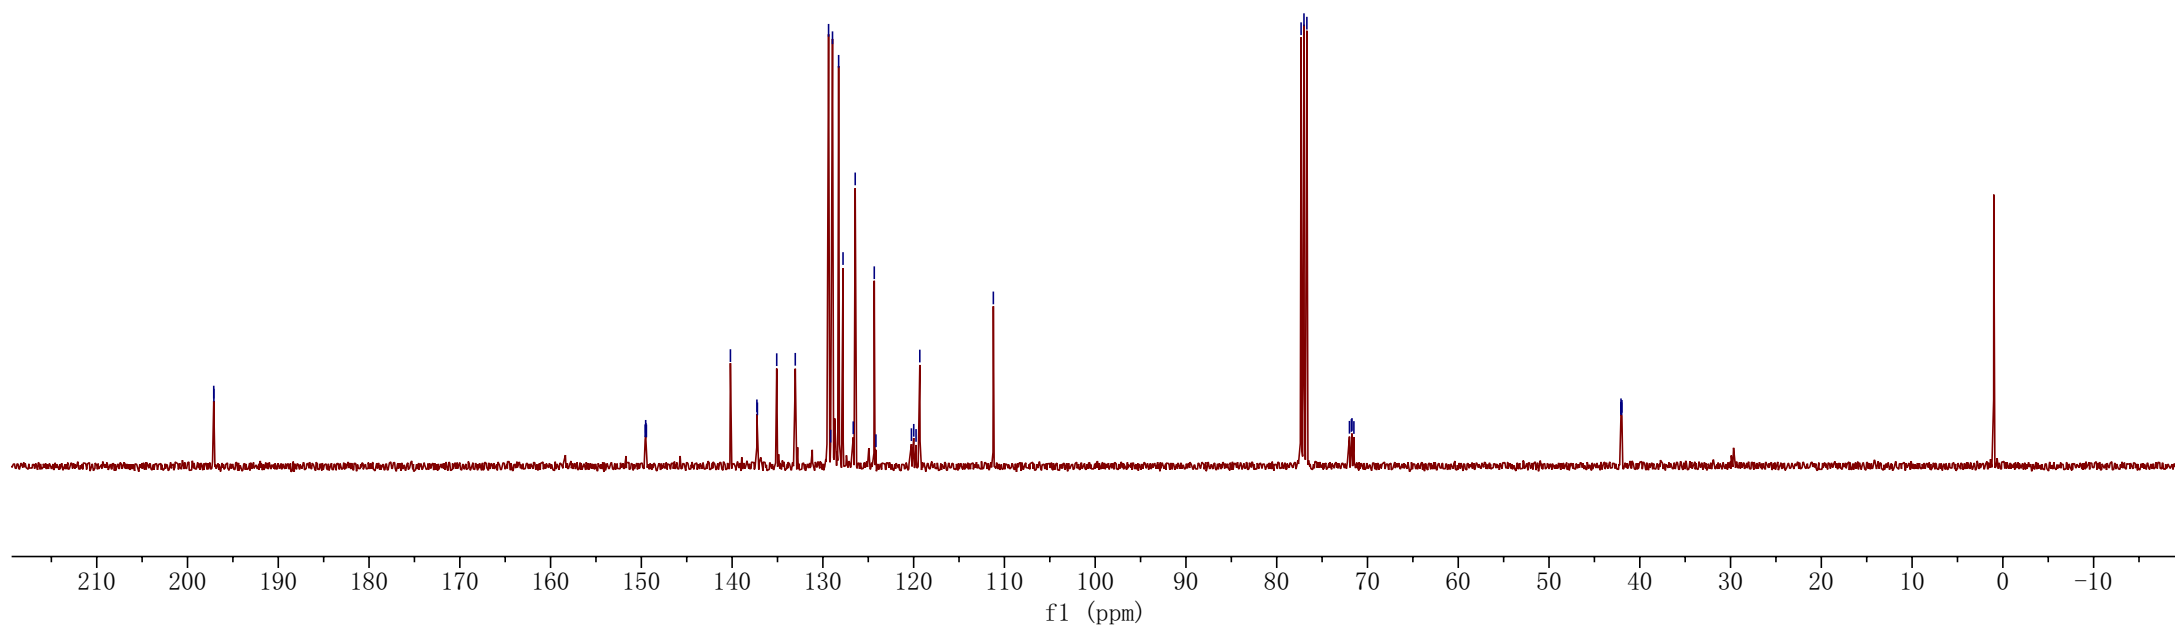

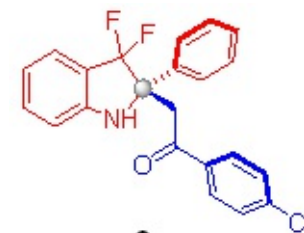

**3ao**  
<sup>19</sup>F NMR (376 MHz, CDCl<sub>3</sub>)

-85.12  
-85.78

-106.56  
-107.21

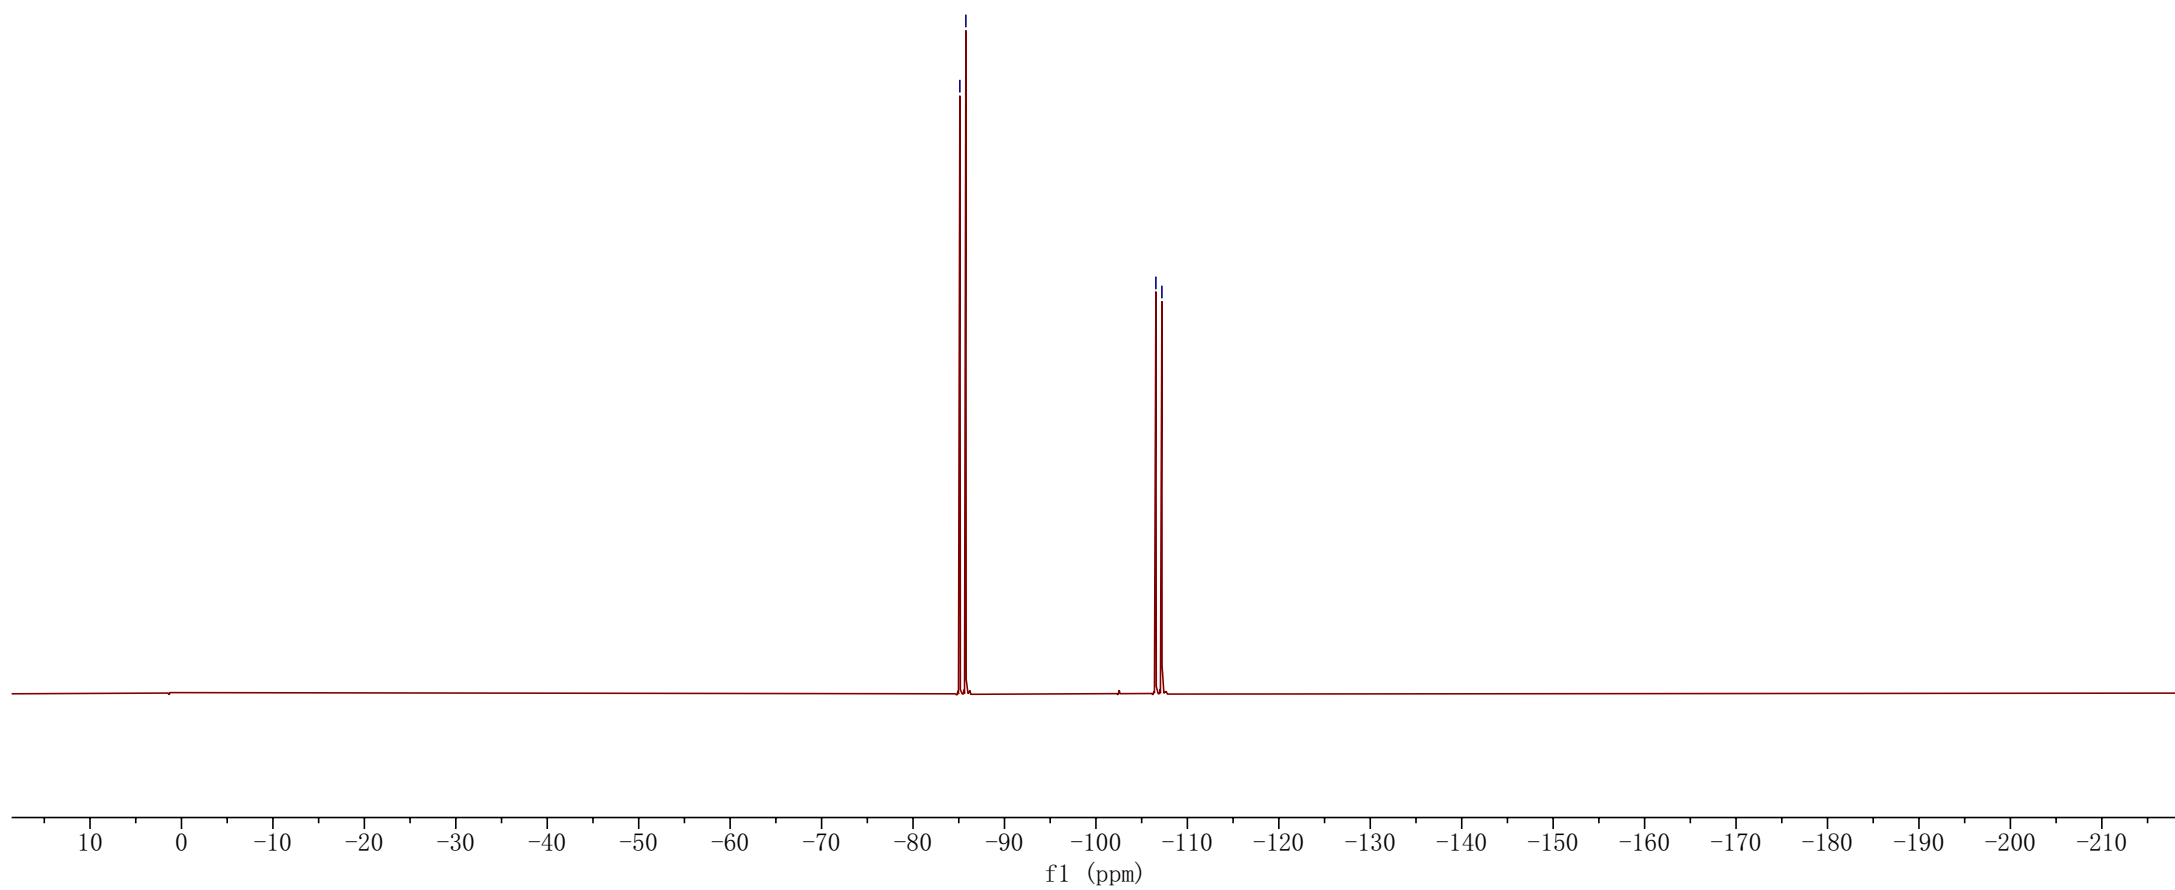

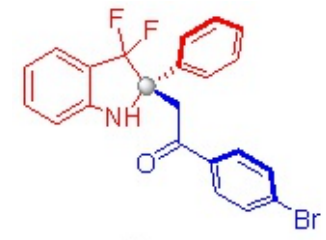

**3ap**  
<sup>1</sup>H NMR (400 MHz, CDCl<sub>3</sub>)

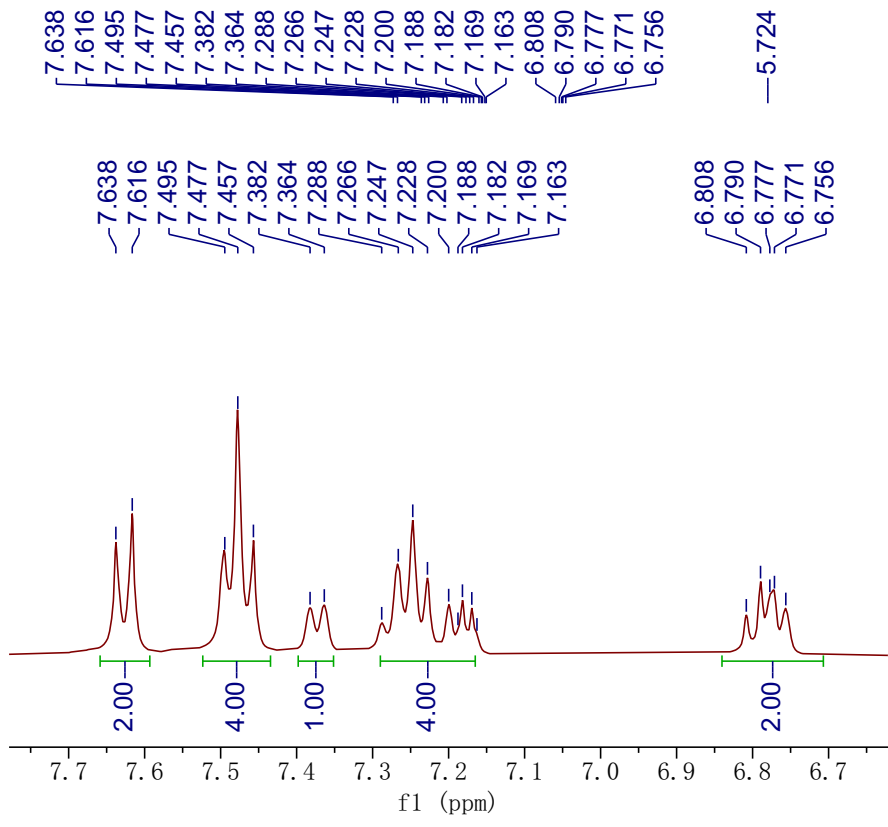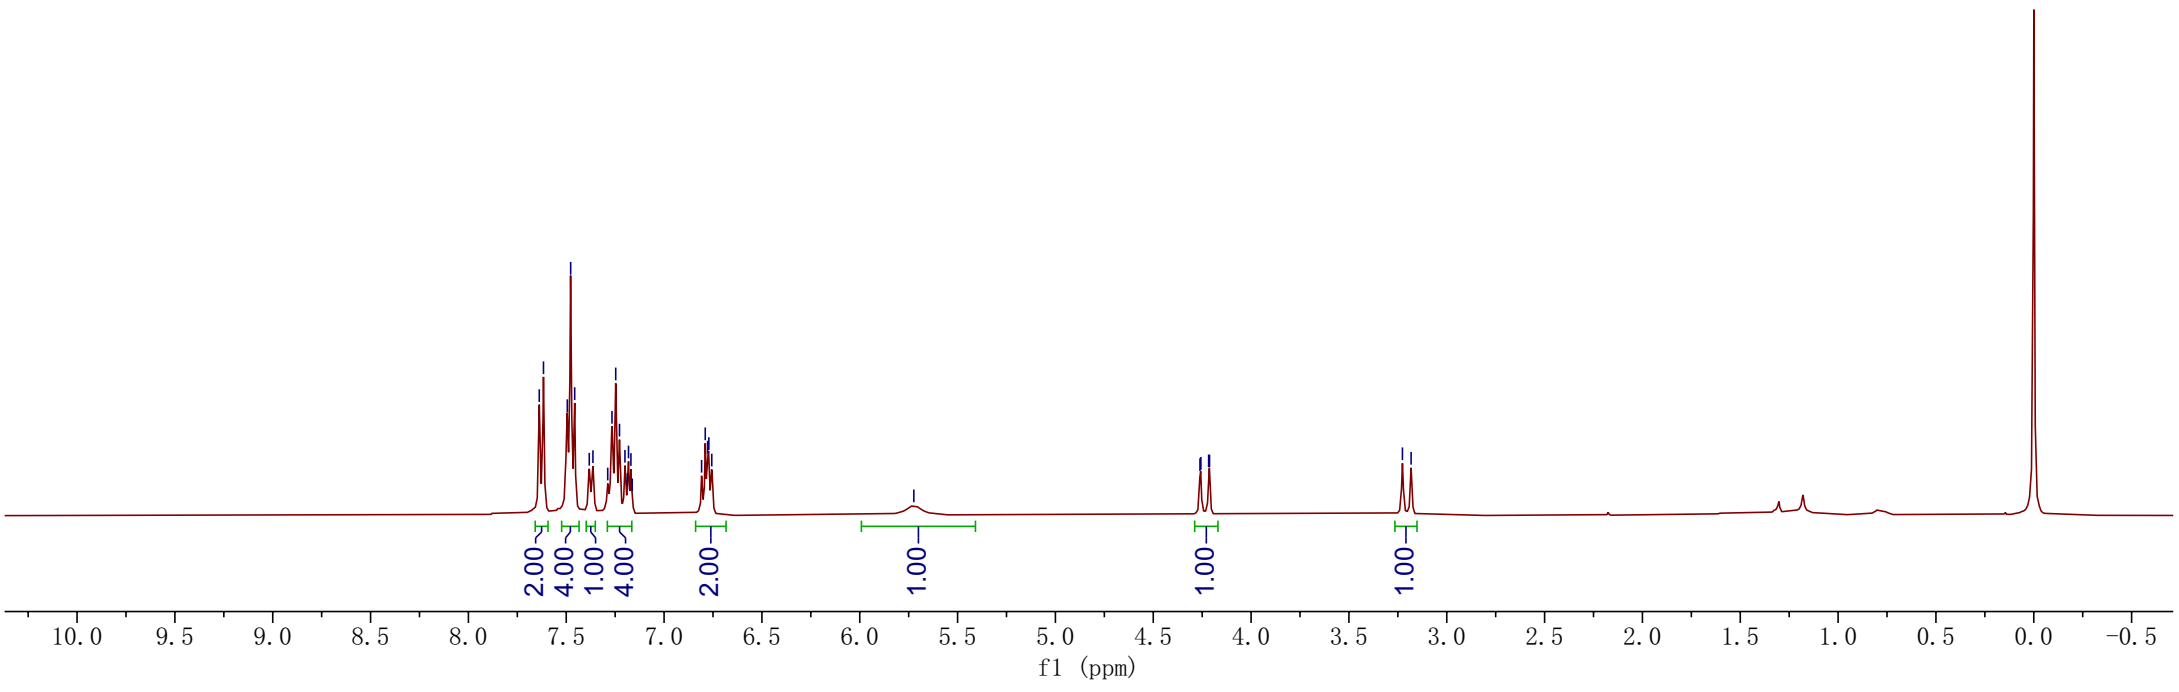

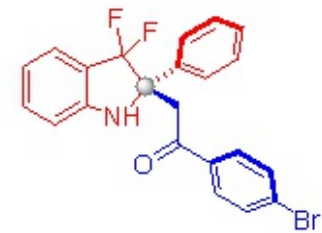

**3ap**

$^{13}\text{C}$  NMR (100 MHz,  $\text{CDCl}_3$ )

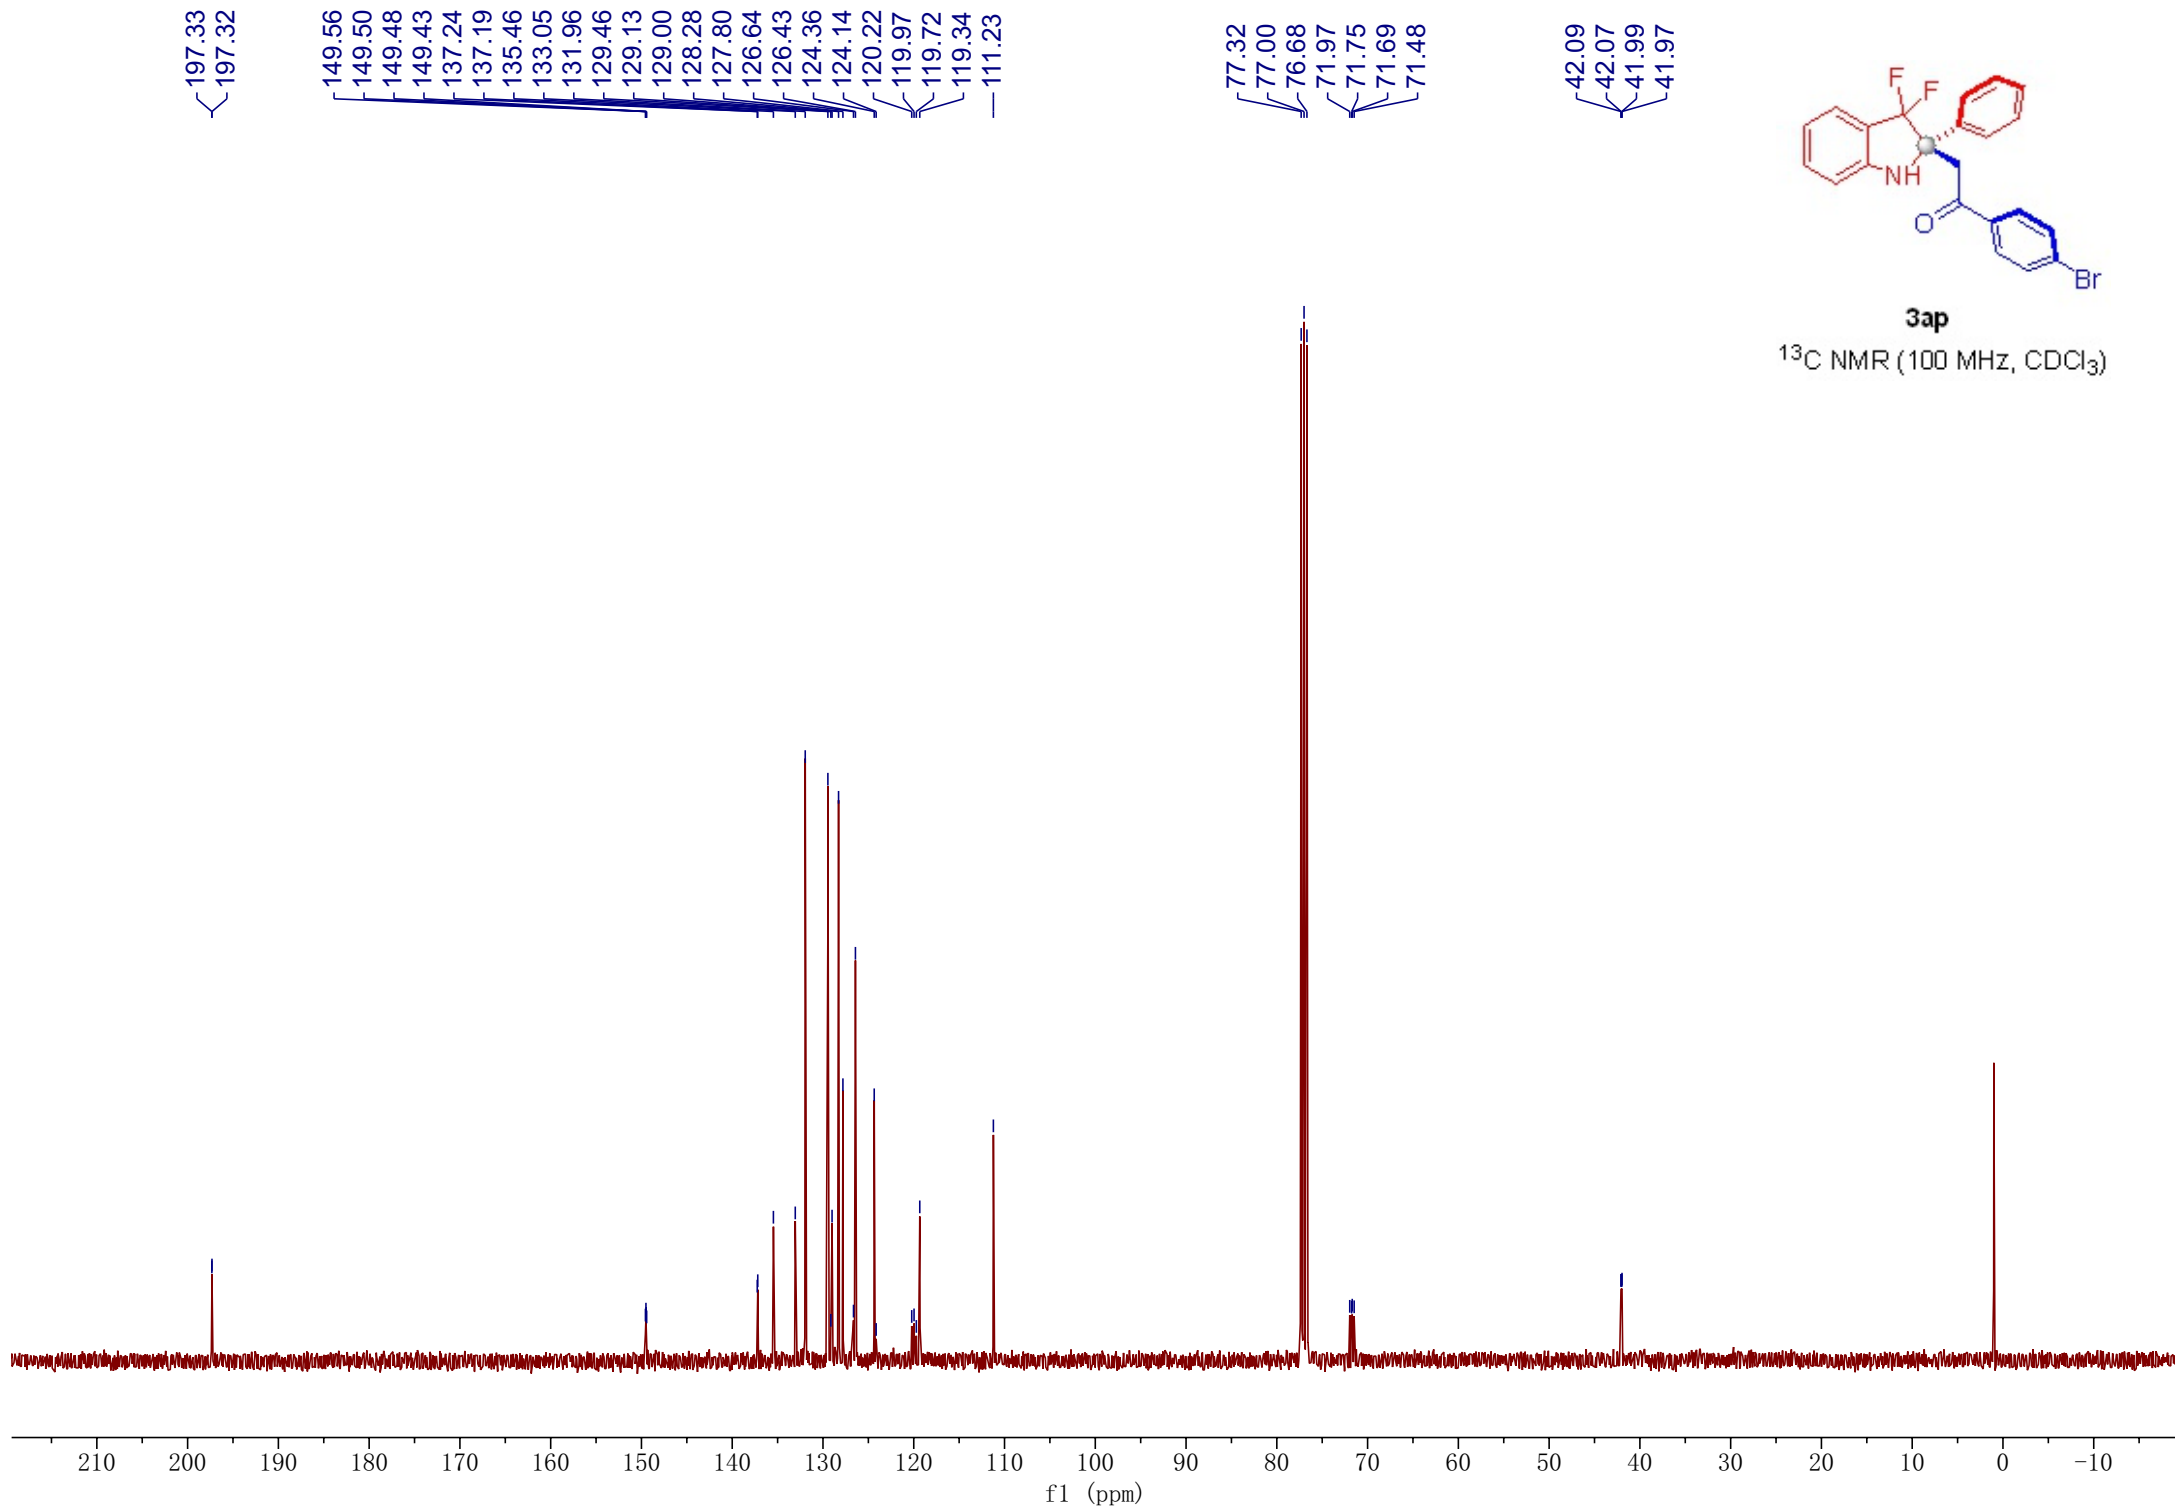



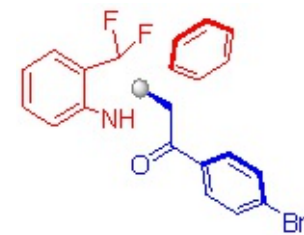

**3ap**

$^{19}\text{F}$  NMR (376 MHz,  $\text{CDCl}_3$ )

-85.14  
-85.80

-106.67  
-107.32

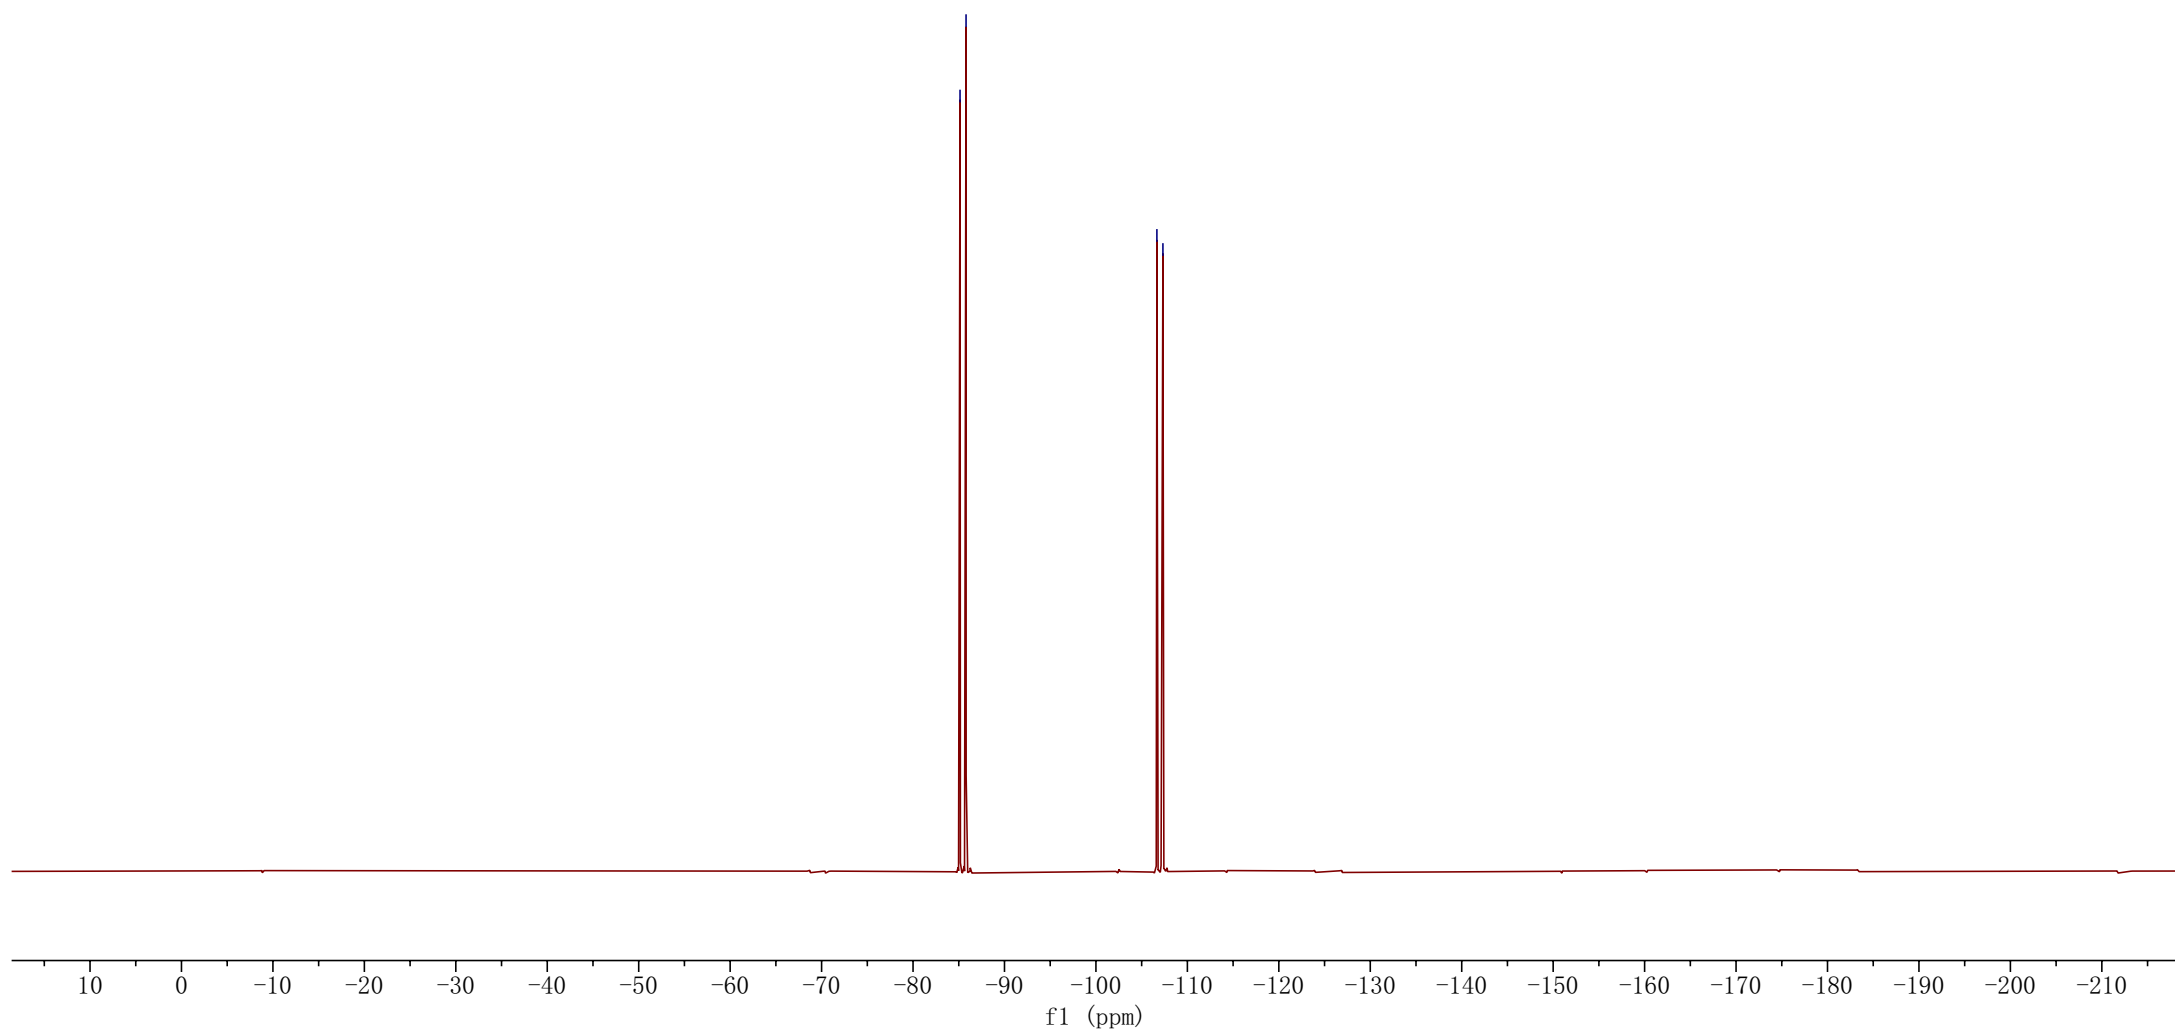

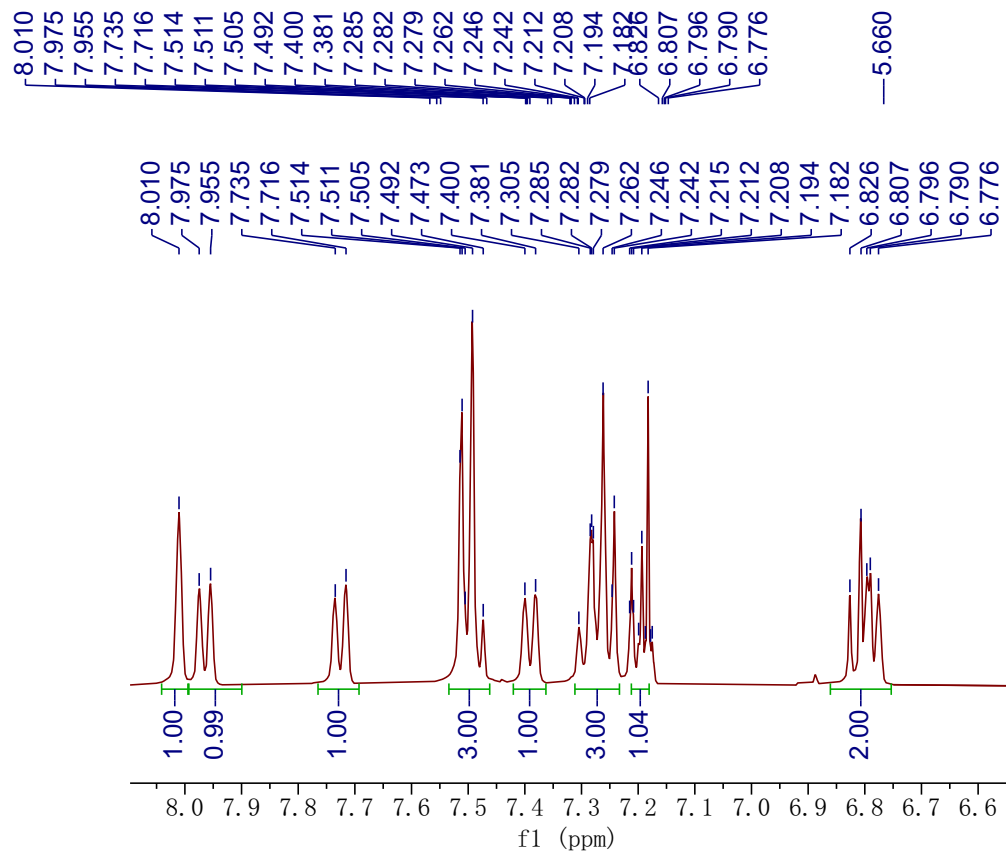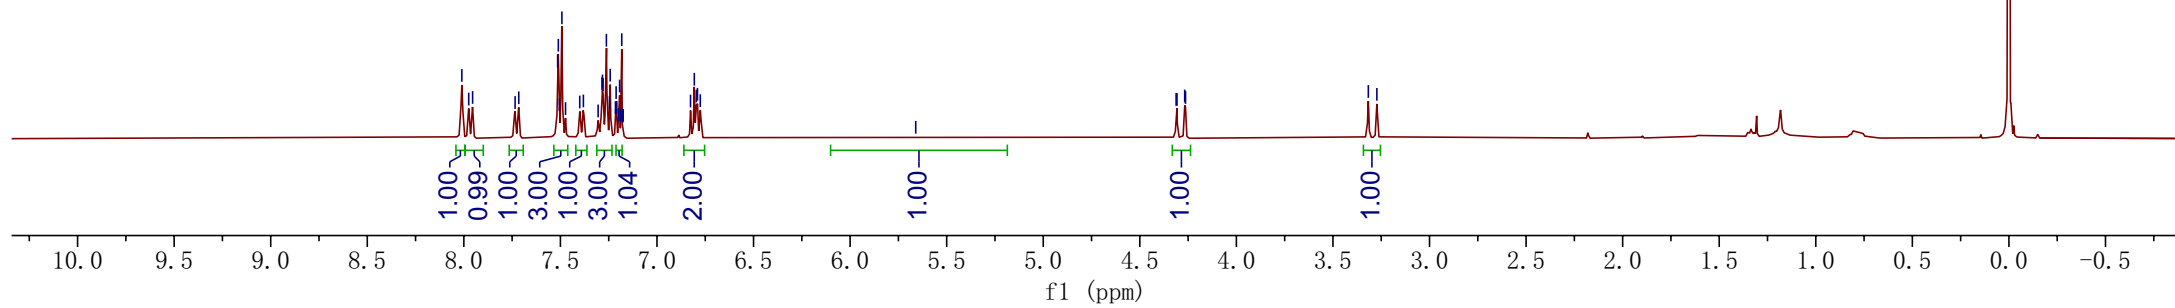

197.06

149.51  
149.45  
149.43  
149.37  
137.21  
137.15  
137.09  
133.11  
131.49  
131.16  
131.11  
130.09  
130.05  
130.02  
129.99  
129.37  
129.11  
128.34  
127.88  
126.61  
126.42  
124.89  
124.85  
124.81  
124.77  
124.40  
124.11  
120.22  
119.97  
119.71  
119.45  
111.24  
77.32  
77.00  
76.68  
71.95  
71.74  
71.67  
71.46

42.53  
42.51  
42.44  
42.42

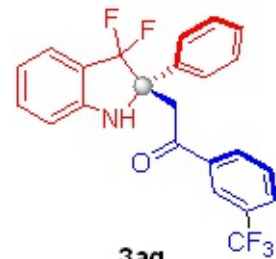

**3aq**  
<sup>13</sup>C NMR (100 MHz, CDCl<sub>3</sub>)

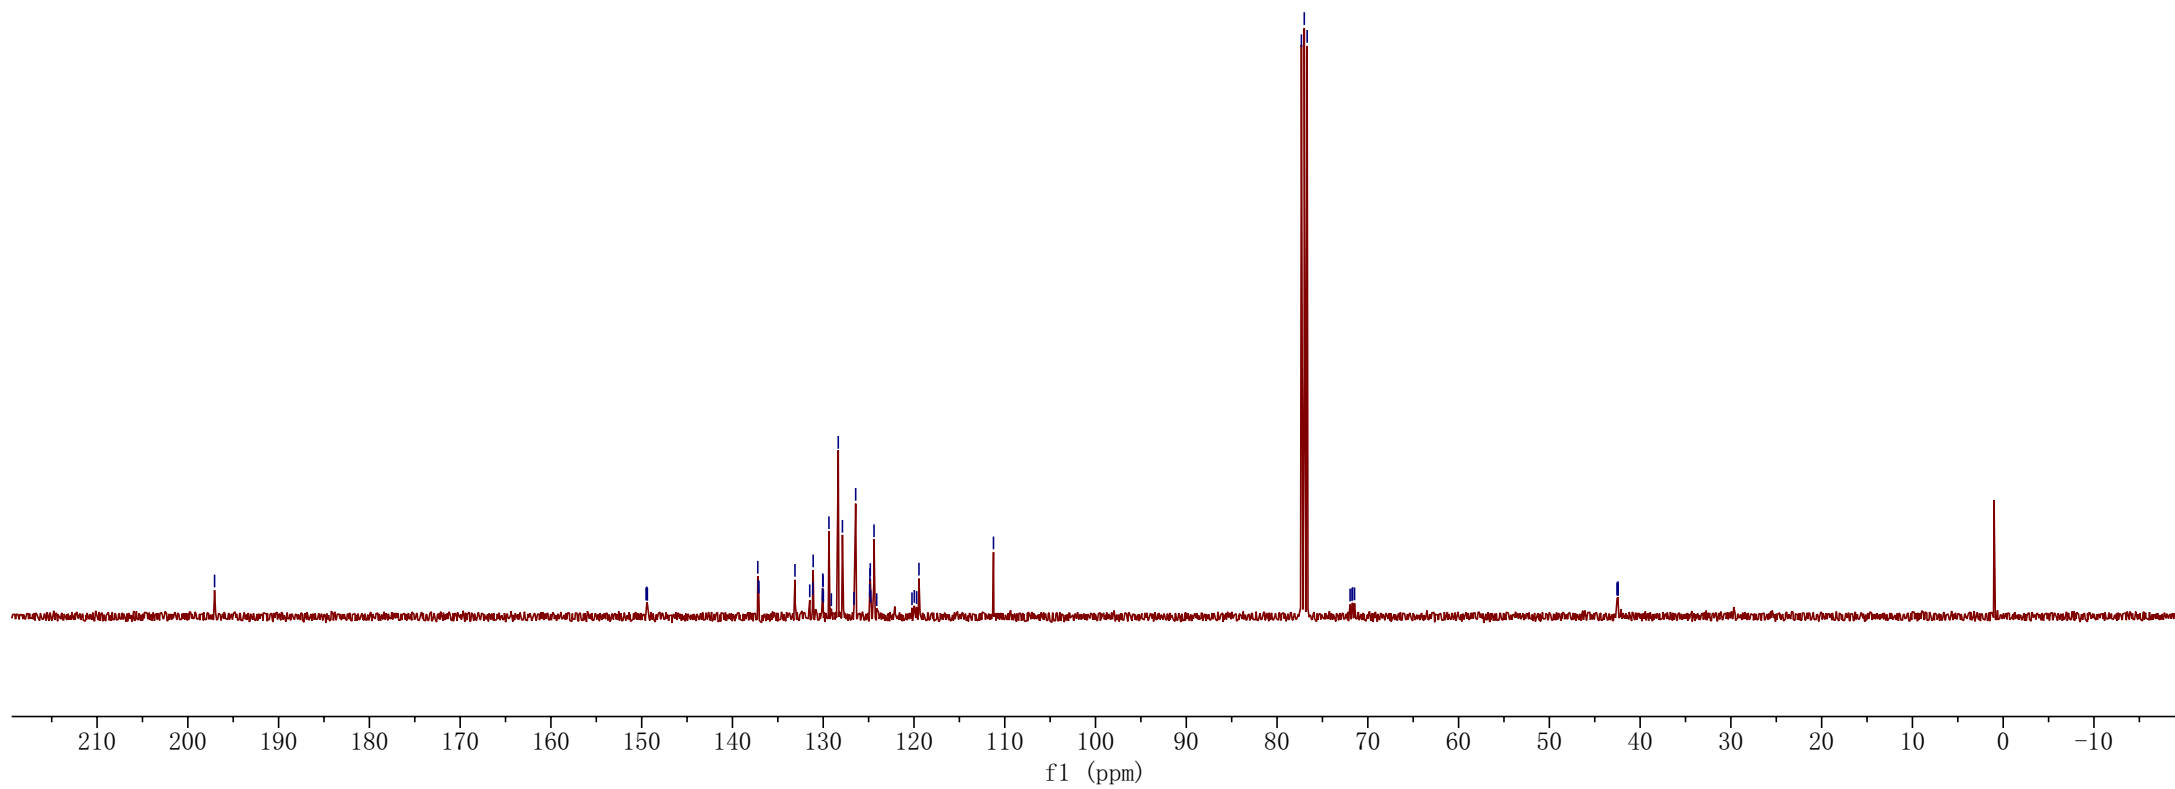

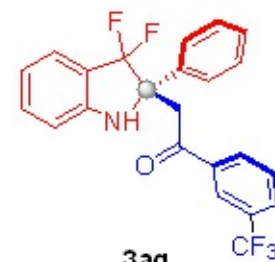

<sup>19</sup>F NMR (376 MHz, CDCl<sub>3</sub>)

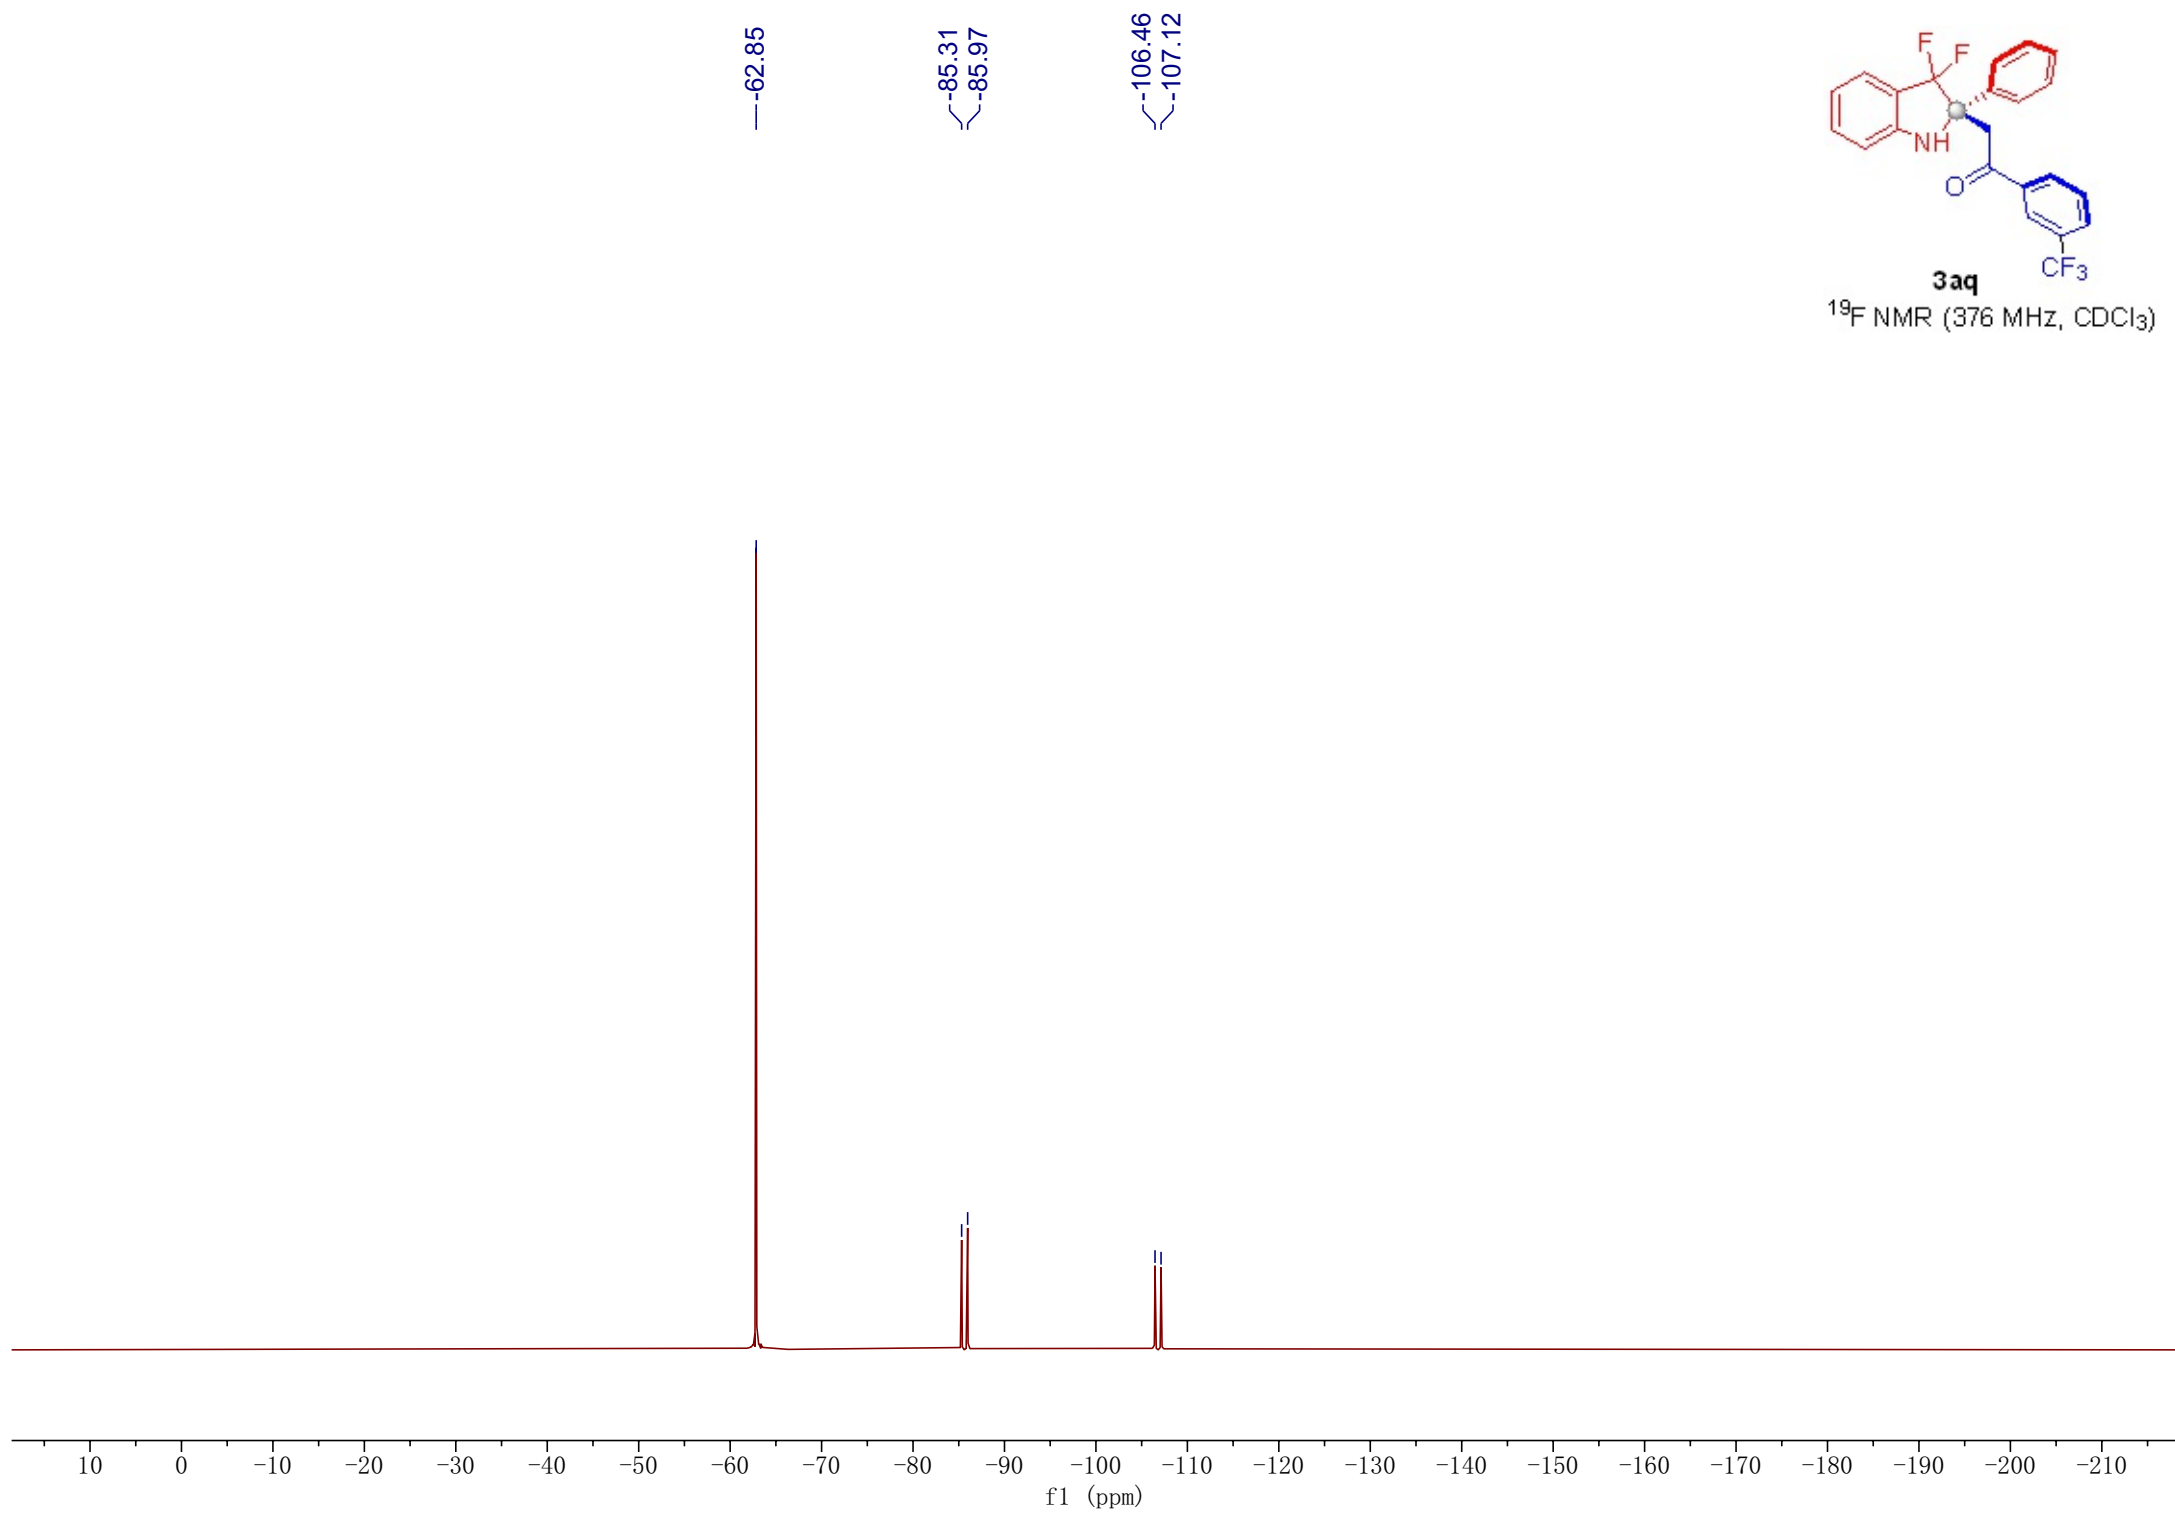

7.867  
7.846  
7.600  
7.580  
7.494  
7.475  
7.385  
7.366  
7.293  
7.274  
7.264  
7.256  
7.246  
7.227  
7.199  
7.182  
7.163  
6.814  
6.795  
6.784  
6.777  
6.763

7.867  
7.846  
7.600  
7.580  
7.494  
7.475  
7.385  
7.366  
7.293  
7.274  
7.264  
7.256  
7.246  
7.227  
7.199  
7.182  
7.163  
6.814  
6.795  
6.784  
6.777  
6.763

4.315  
4.311  
4.271  
4.266

3.298  
3.254

5.685

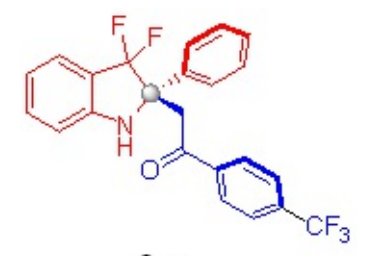

**3ar**  
<sup>1</sup>H NMR (400 MHz, CDCl<sub>3</sub>)

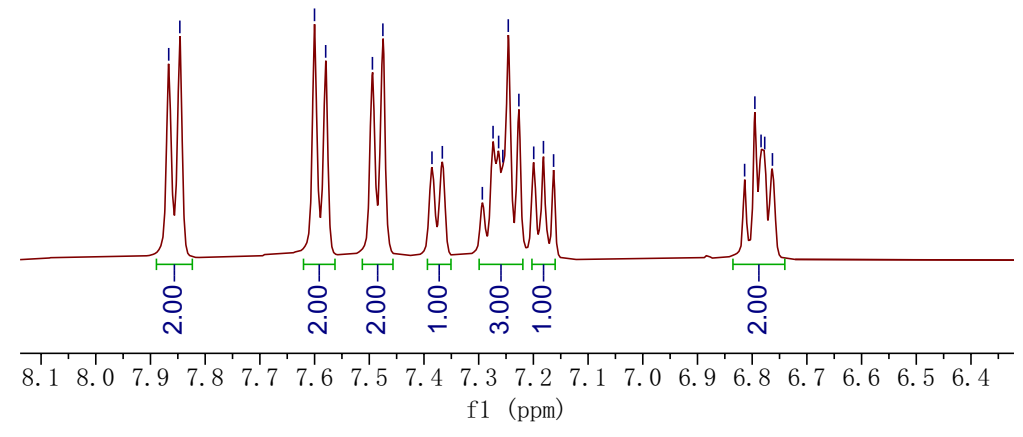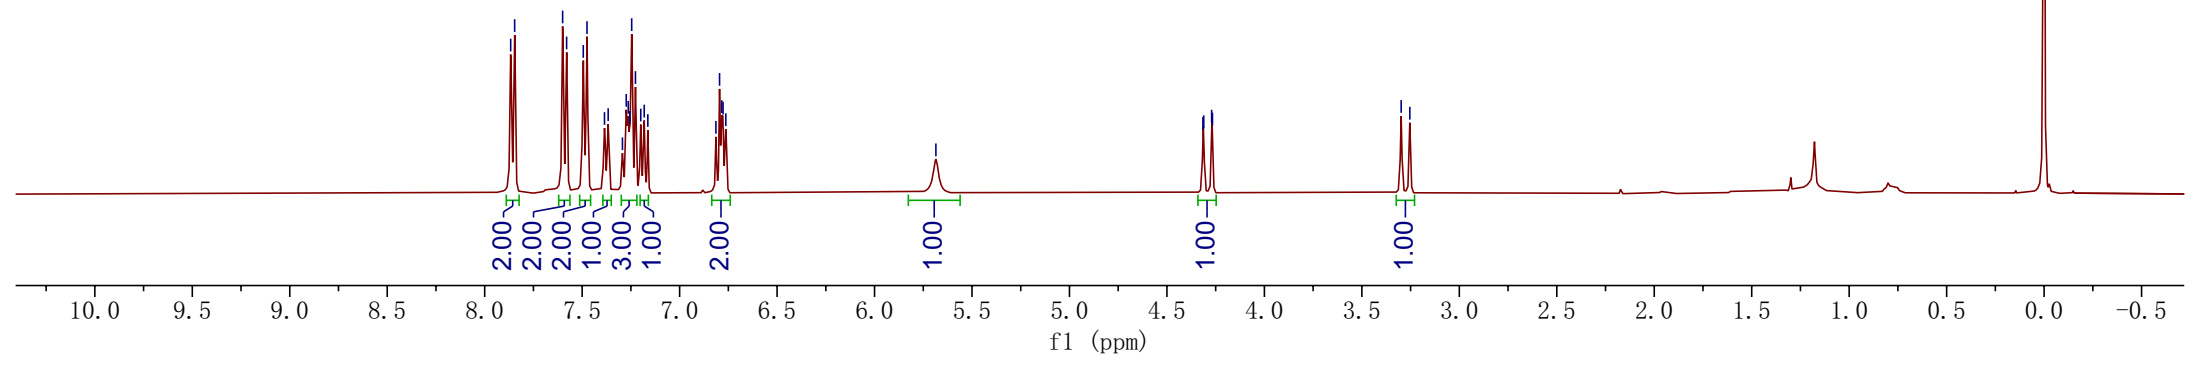

— 197.503

149.531  
149.473  
149.451  
149.393  
139.373  
137.163  
137.107  
135.007  
134.681  
133.118  
129.109  
128.346  
128.316  
127.887  
126.615  
126.425  
125.778  
125.743  
125.703  
125.667  
124.747  
124.398  
124.118  
122.035  
120.198  
119.947  
119.691  
119.443  
111.218  
77.320  
77.203  
77.002  
76.684  
71.955  
71.743  
71.680  
71.466

42.603  
42.517  
42.494

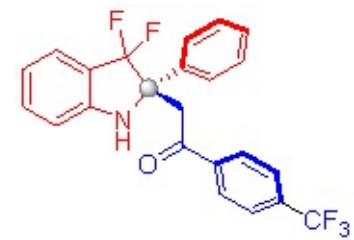

**3ar**  
<sup>13</sup>C NMR (100 MHz, CDCl<sub>3</sub>)

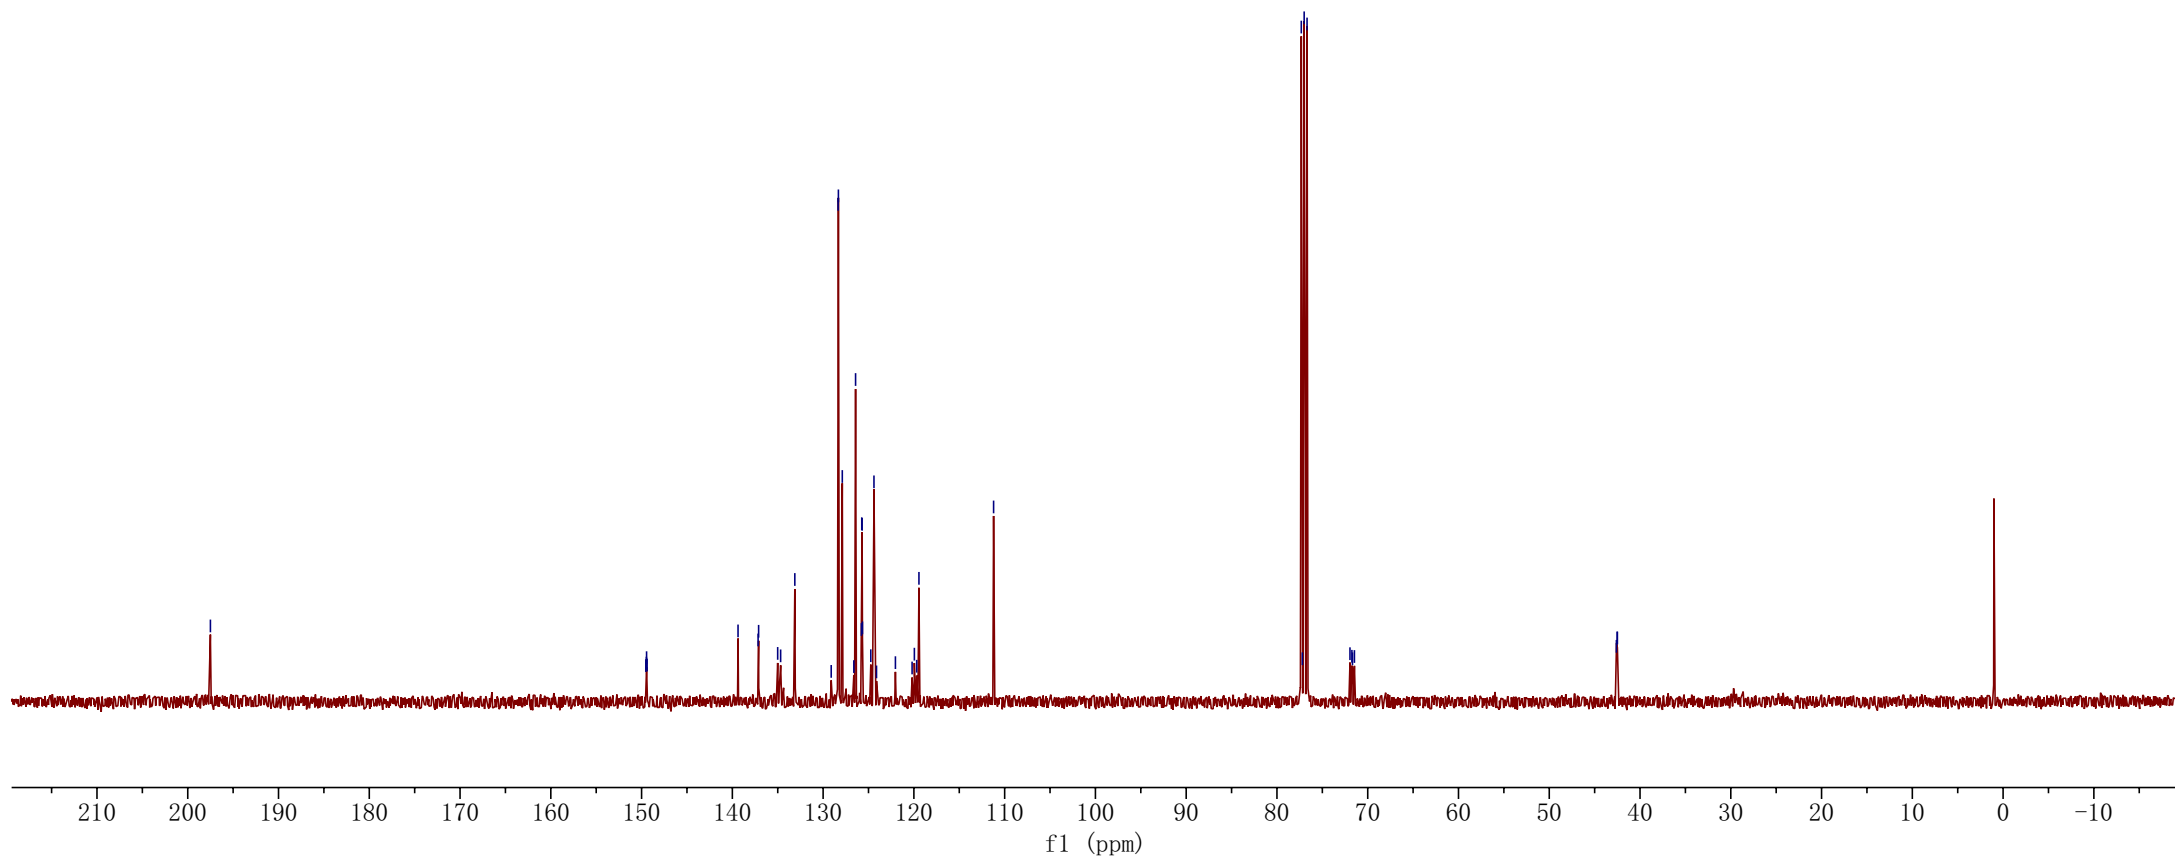

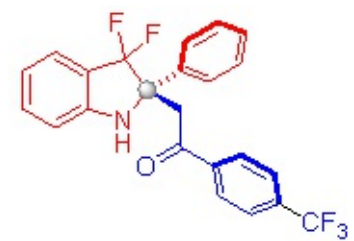

**3ar**

<sup>19</sup>F NMR (376 MHz, CDCl<sub>3</sub>)

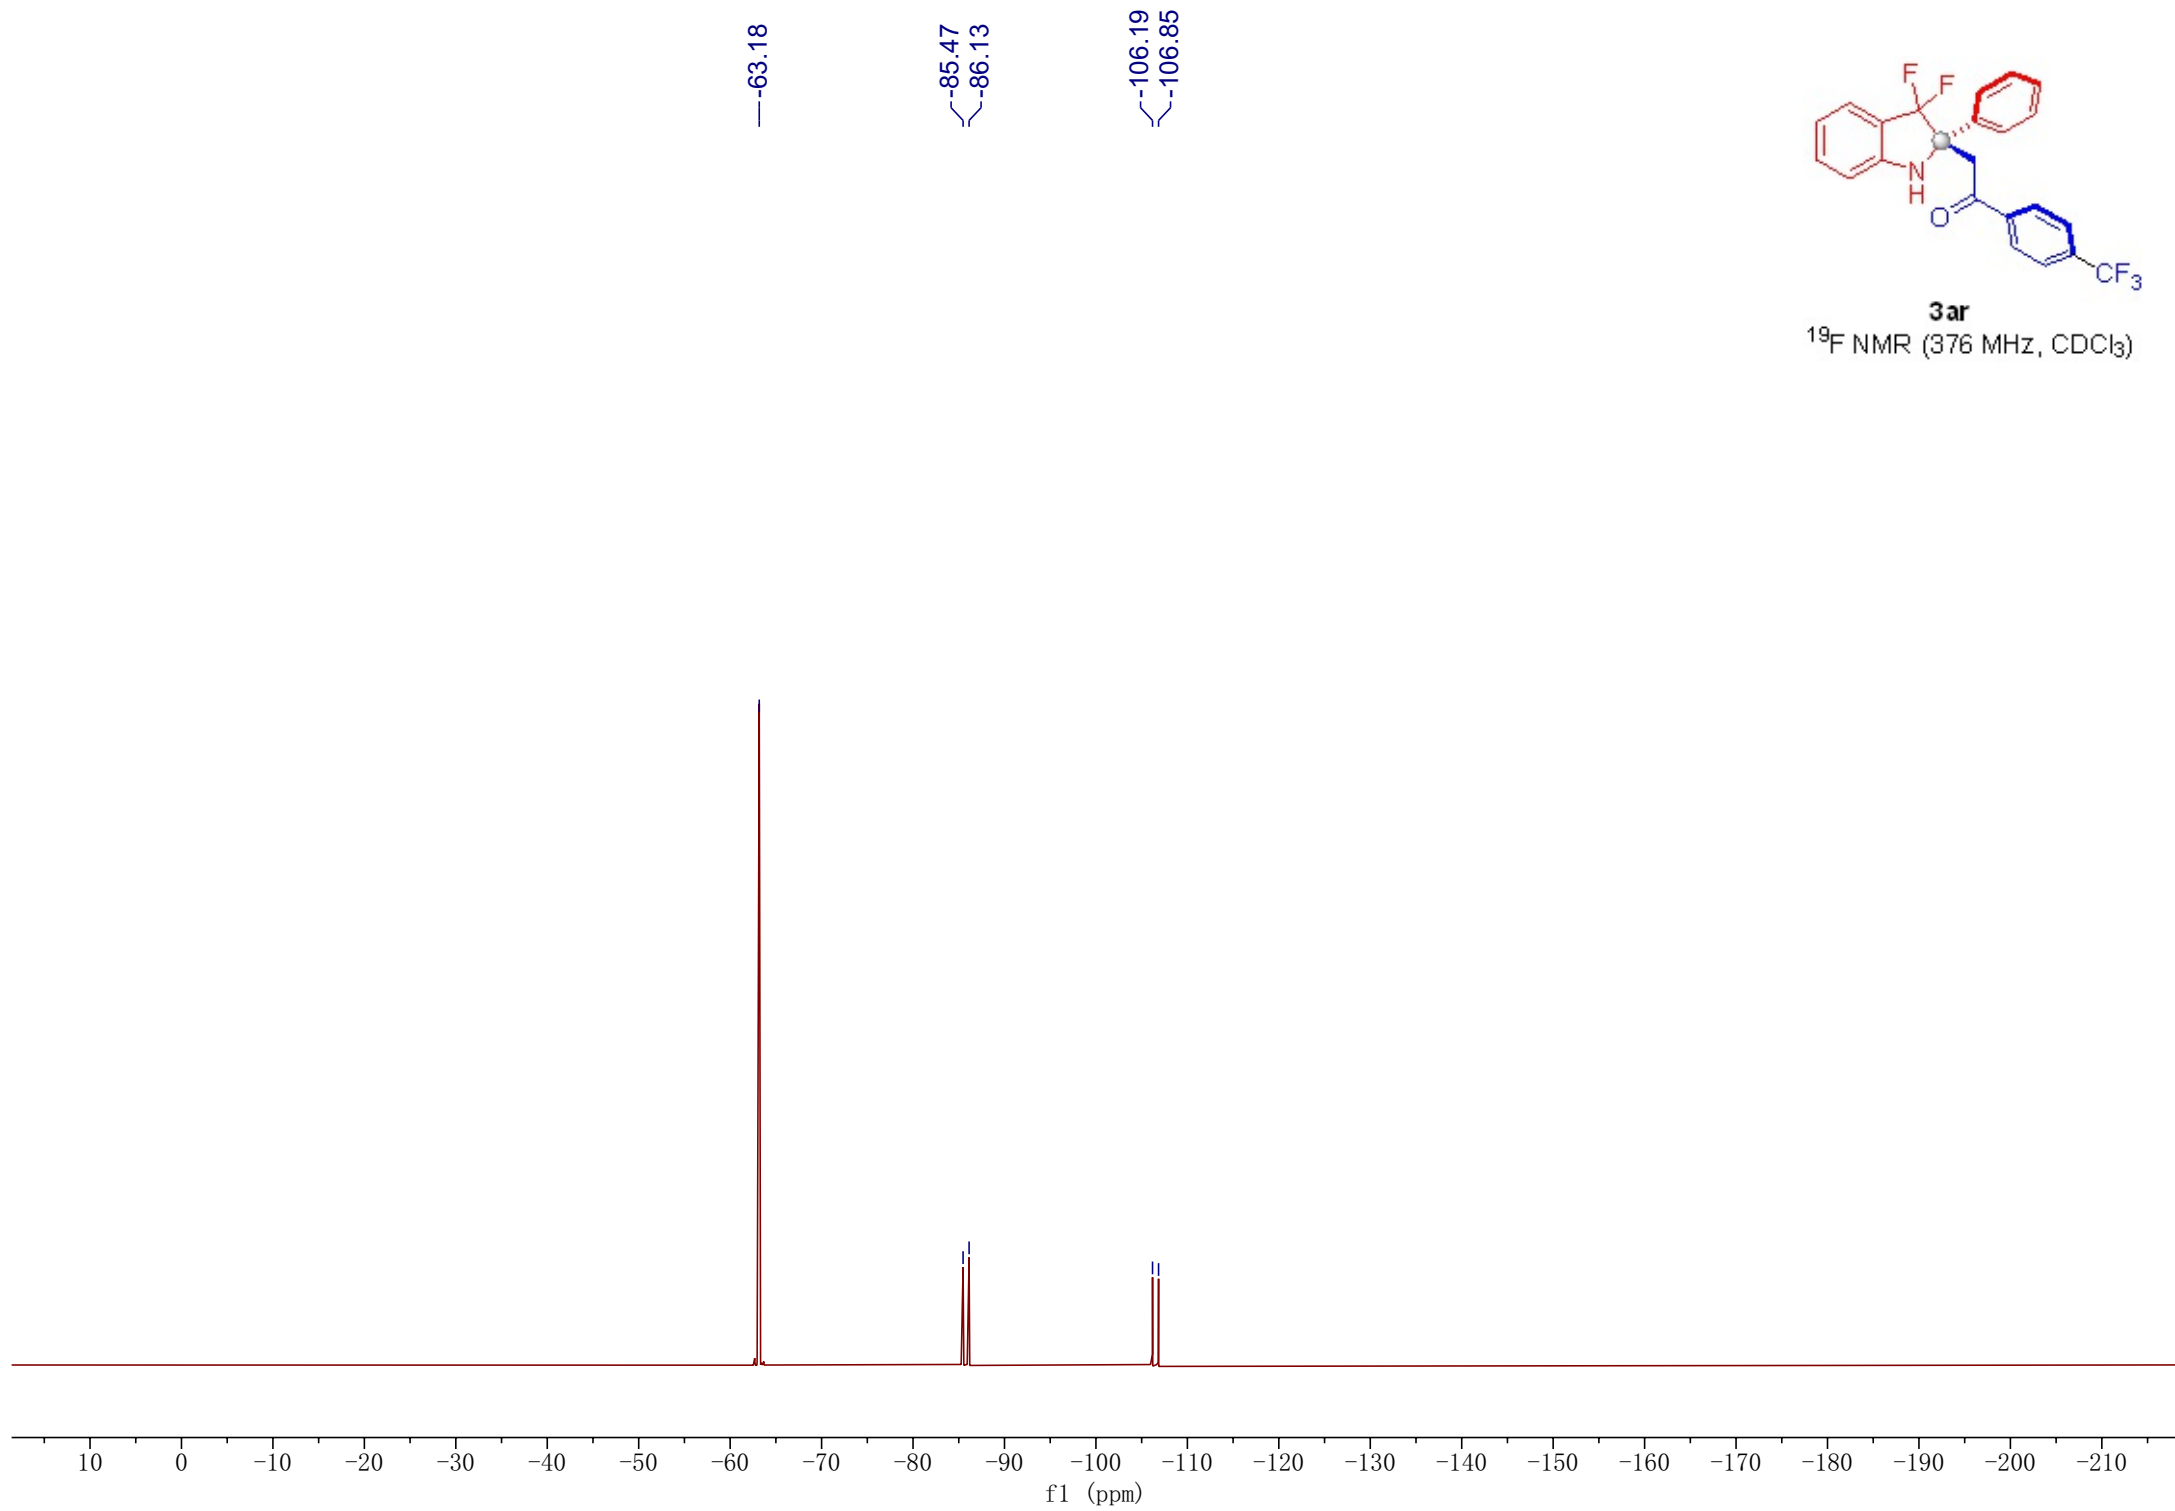

8.440  
7.975  
7.955  
7.923  
7.918  
7.901  
7.897  
7.876  
7.862  
7.855  
7.841  
7.672  
7.654  
7.628  
7.625  
7.609  
7.604  
7.596  
7.592  
7.575  
7.558  
7.555  
7.525  
7.507  
7.405  
7.386  
7.374  
7.368  
7.356  
7.336  
7.296  
7.278  
6.928  
6.909  
6.890  
5.962  
4.593  
4.550

8.440  
7.975  
7.955  
7.901  
7.897  
7.876  
7.862  
7.855  
7.841  
7.672  
7.654  
7.628  
7.625  
7.609  
7.604  
7.596  
7.592  
7.575  
7.558  
7.525  
7.507  
7.386  
7.374  
7.368  
7.356  
7.336  
7.296  
7.278  
6.909  
6.890

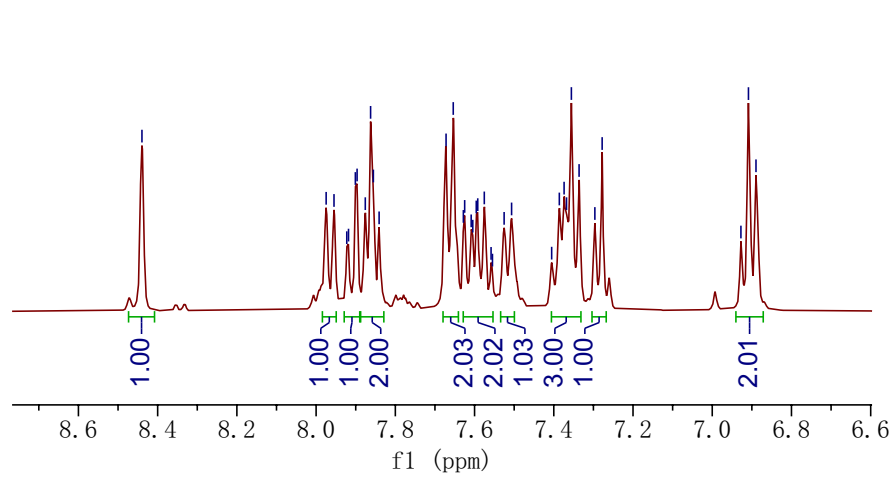

3.500  
3.456

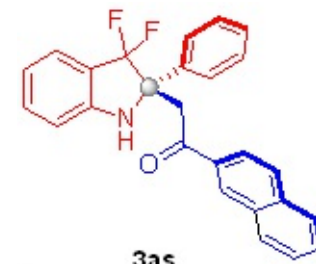

<sup>1</sup>H NMR (400 MHz, CDCl<sub>3</sub>)

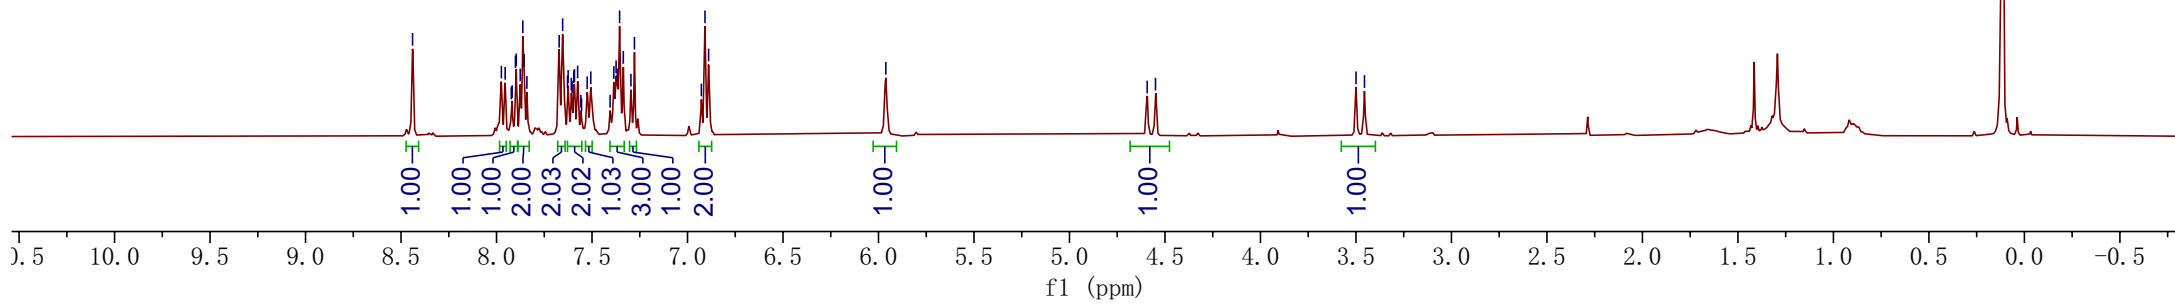



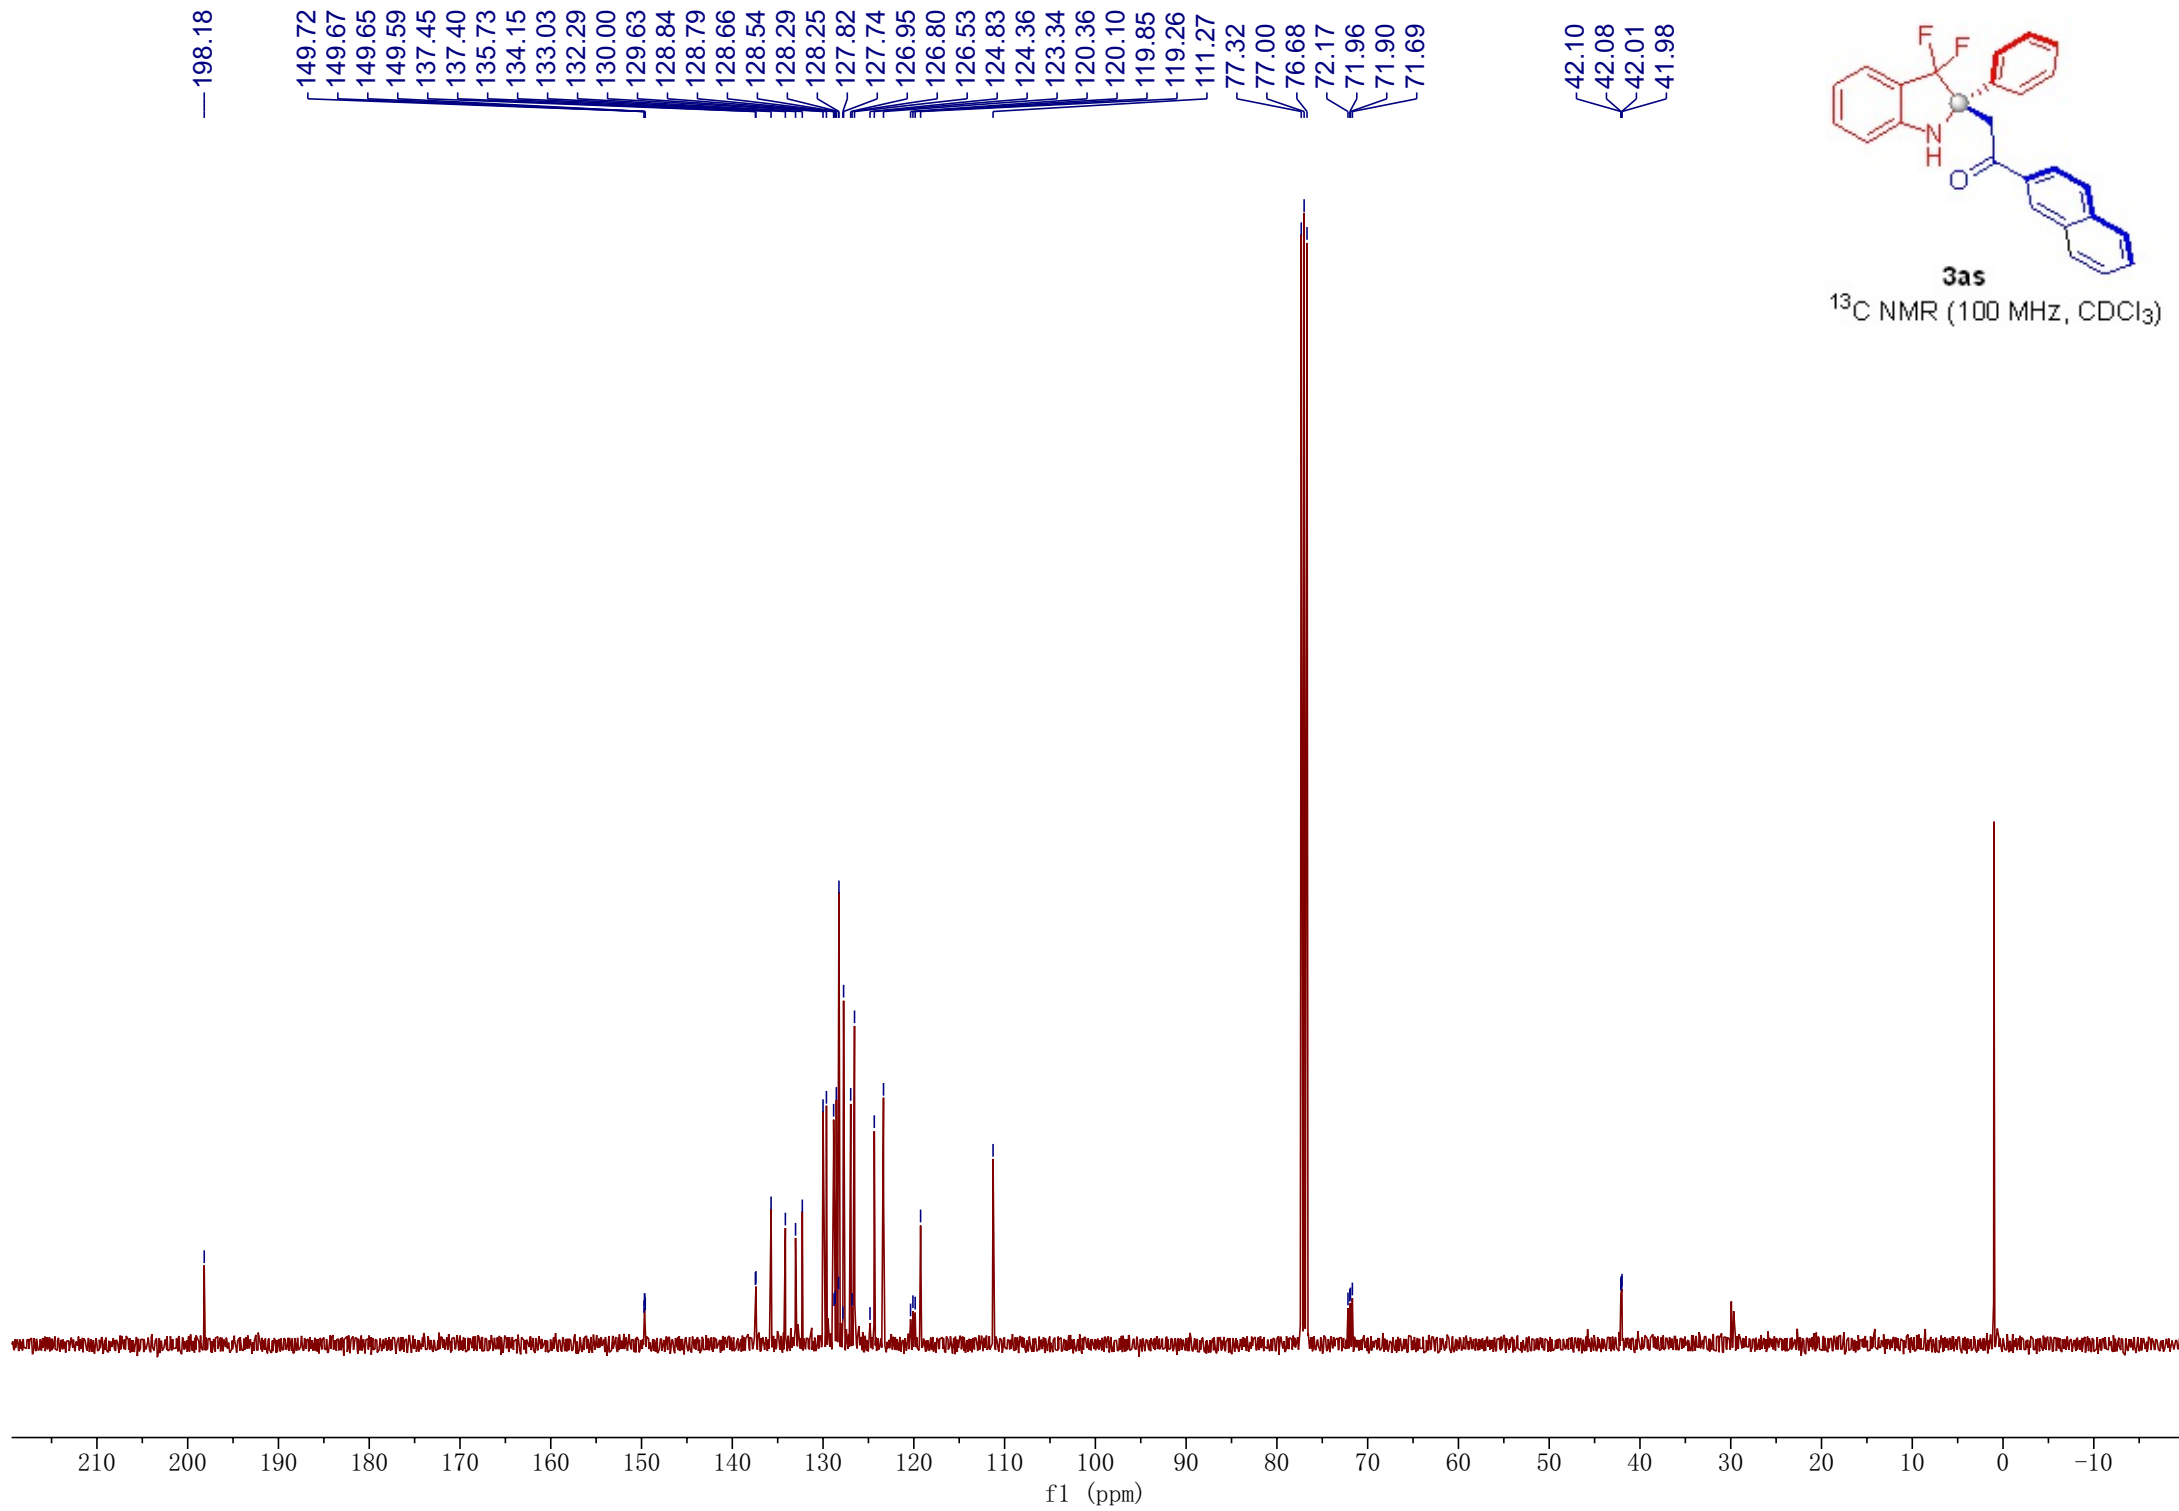

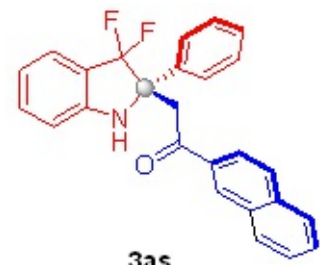

**3as**  
<sup>19</sup>F NMR (376 MHz, CDCl<sub>3</sub>)

-84.86  
-85.51

-106.91  
-107.57

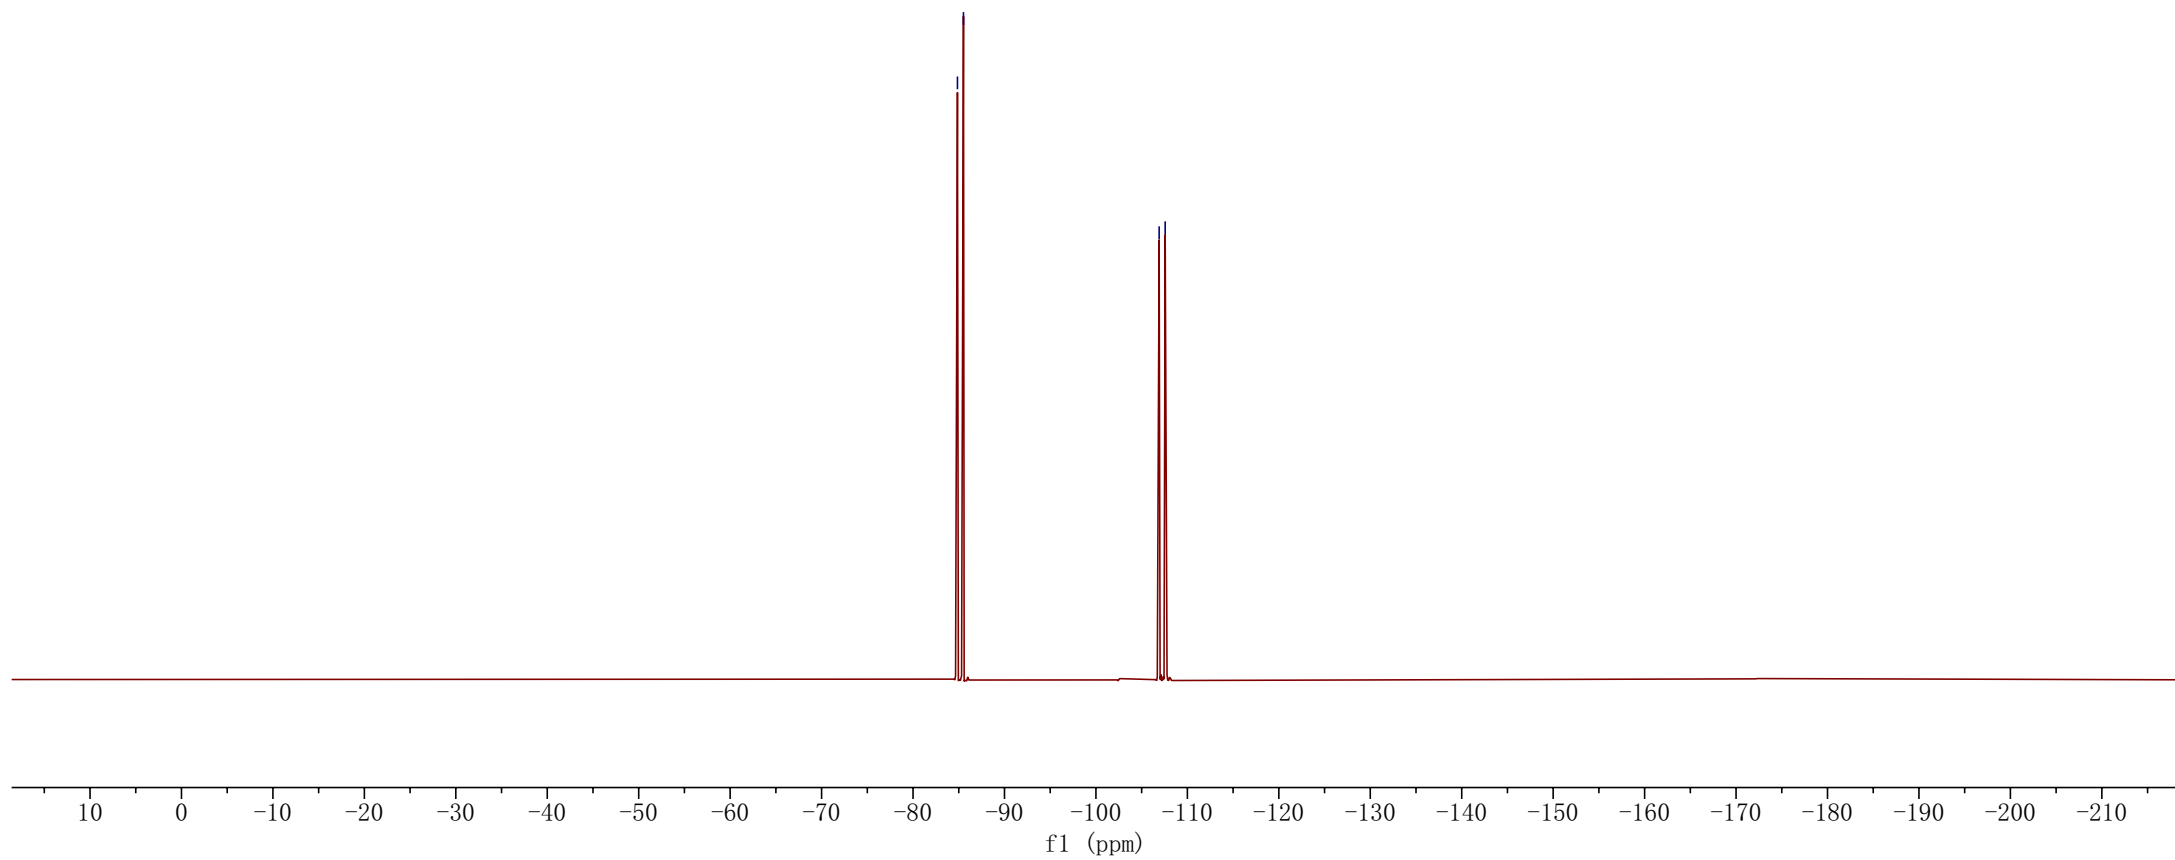

7.639  
7.619  
7.530  
7.528  
7.526  
7.485  
7.466  
7.386  
7.367  
7.356  
7.351  
7.347  
7.338  
7.318  
7.285  
7.272  
7.267  
7.260  
7.131  
7.122  
6.907  
6.895  
6.888  
6.875  
6.870  
6.470  
6.466  
6.461  
6.457  
5.955

4.285  
4.280  
4.242  
4.237

3.118  
3.076

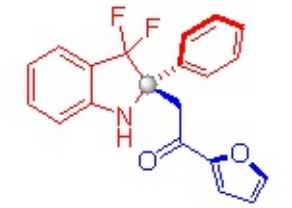

**3at**  
<sup>1</sup>H NMR (400 MHz, CDCl<sub>3</sub>)

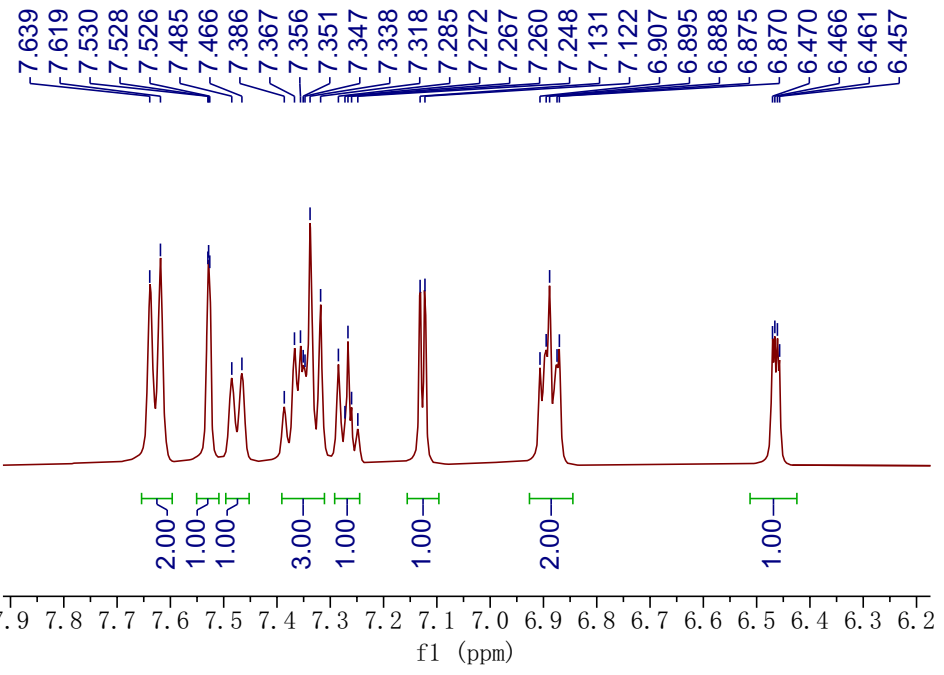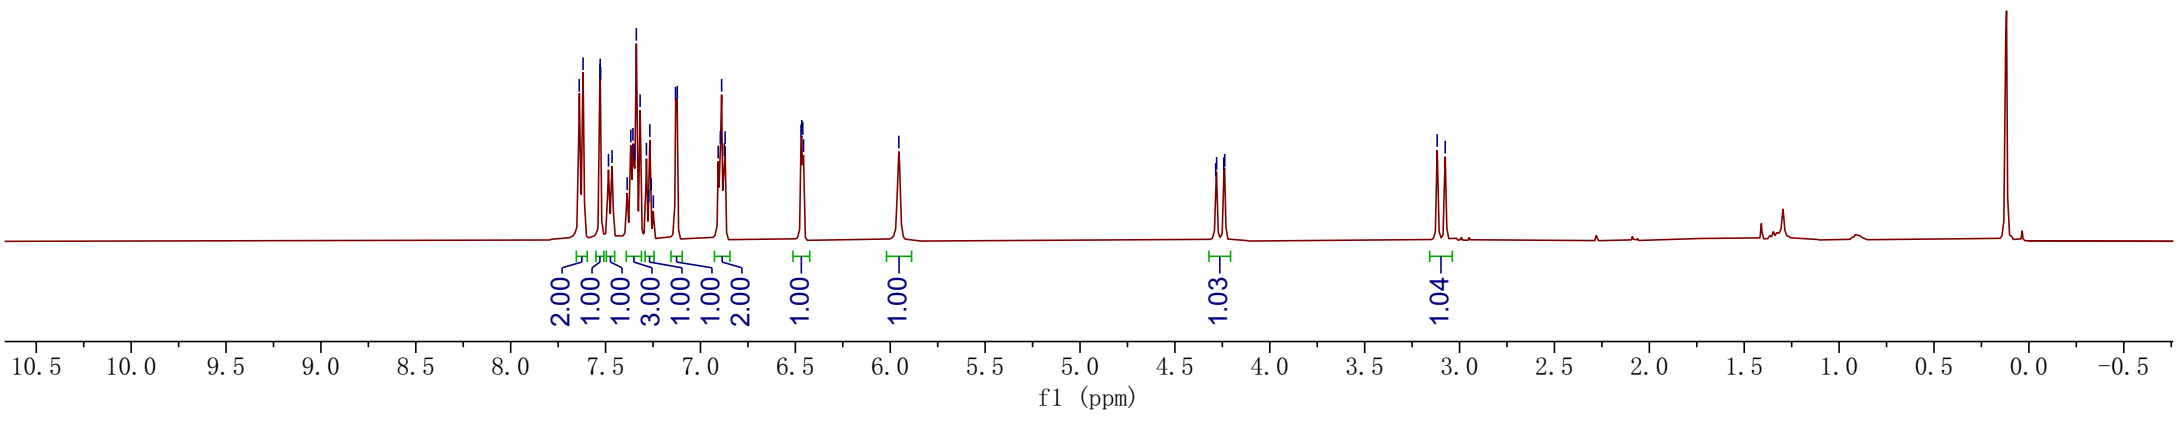

187.08  
187.06

152.49  
149.53  
149.48  
149.45  
149.39  
146.92  
136.95  
136.90  
132.97  
129.05  
128.15  
127.76  
126.58  
126.56  
124.23  
124.06  
120.37  
120.13  
120.11  
119.87  
119.33  
119.31  
118.07  
112.47  
111.47

77.32  
77.00  
76.68  
72.16  
71.95  
71.88  
71.67

41.76  
41.74  
41.67  
41.64

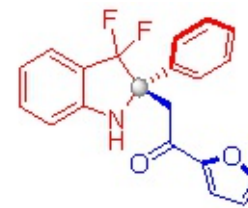

**3at**  
<sup>13</sup>C NMR (100 MHz, CDCl<sub>3</sub>)

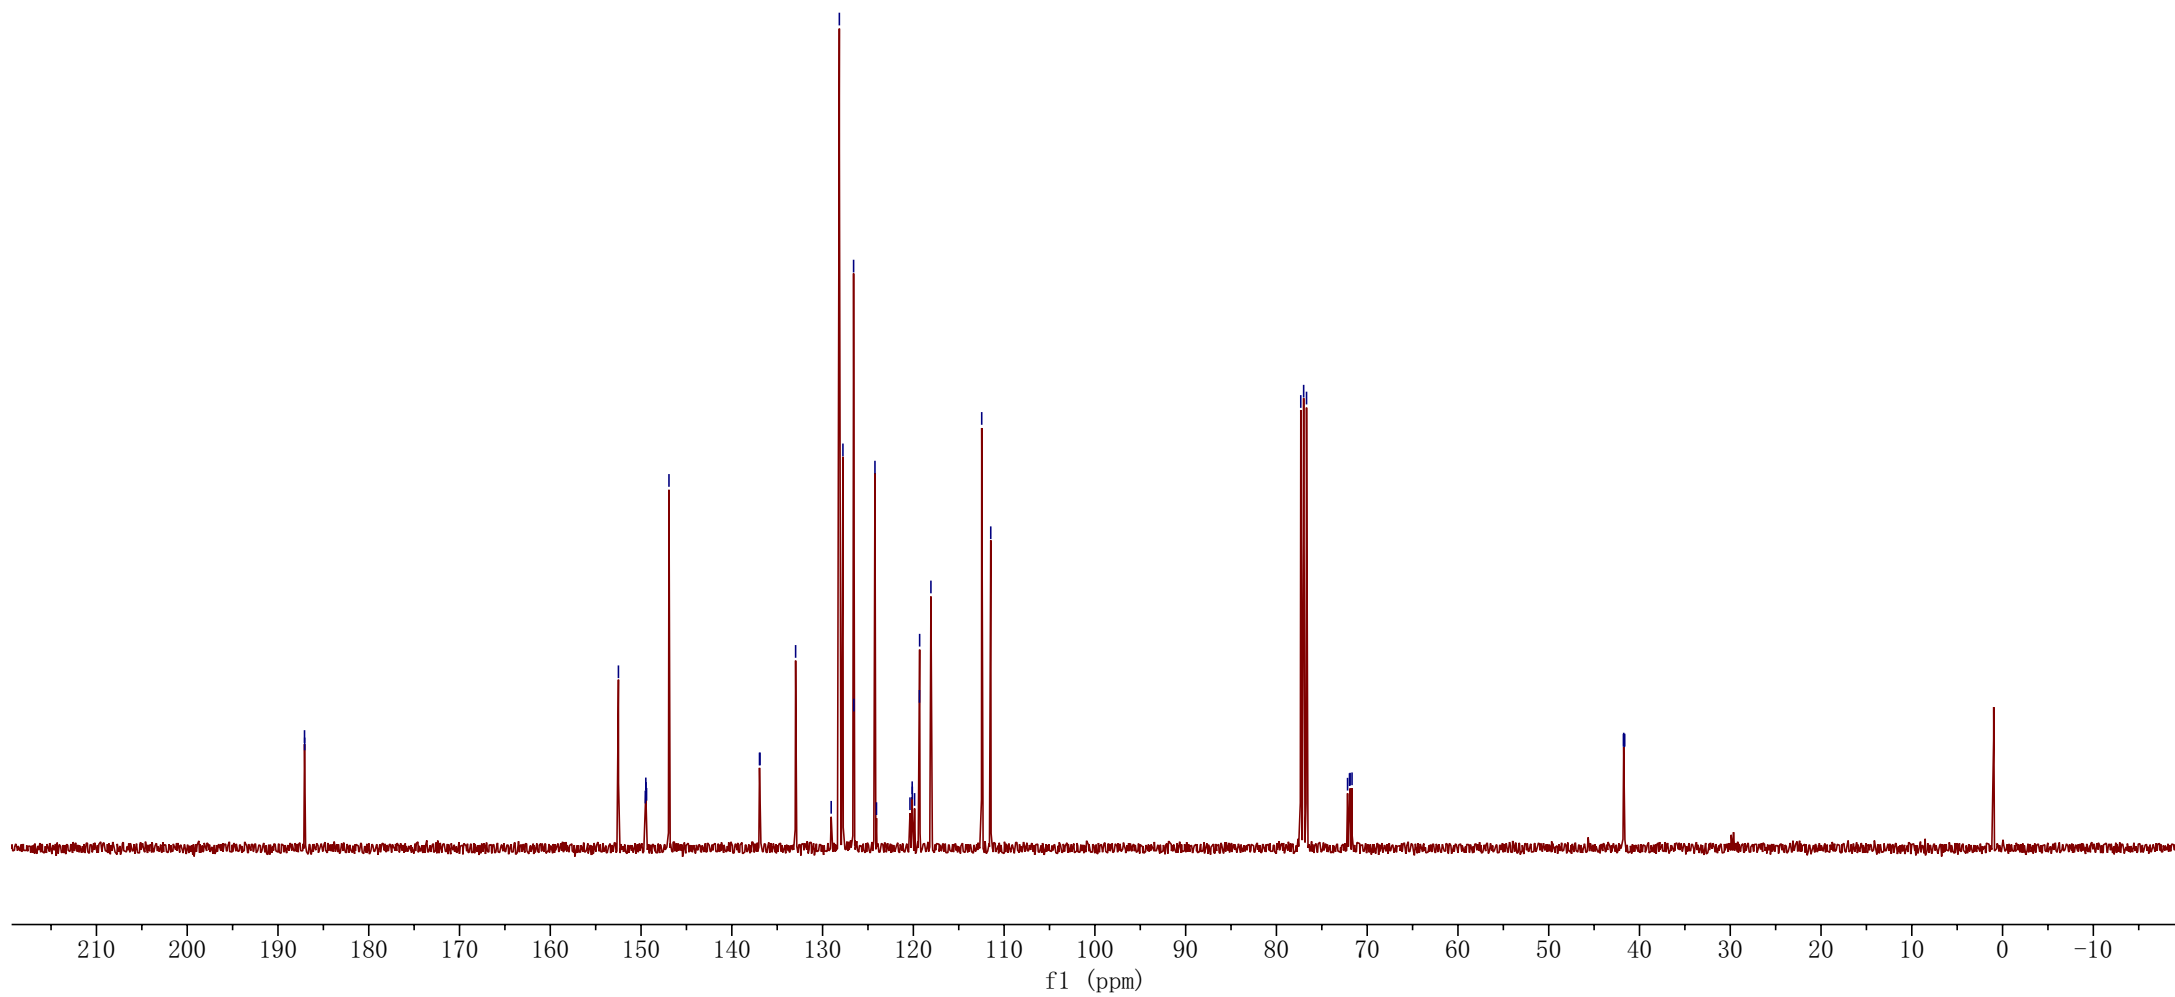

--84.38  
--84.40  
--85.04  
--85.06

--107.54  
--107.55  
--108.19  
--108.21

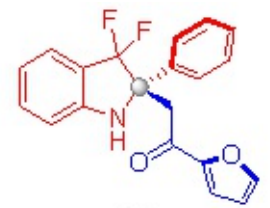

**3at**  
19F NMR (376 MHz, CDCl<sub>3</sub>)

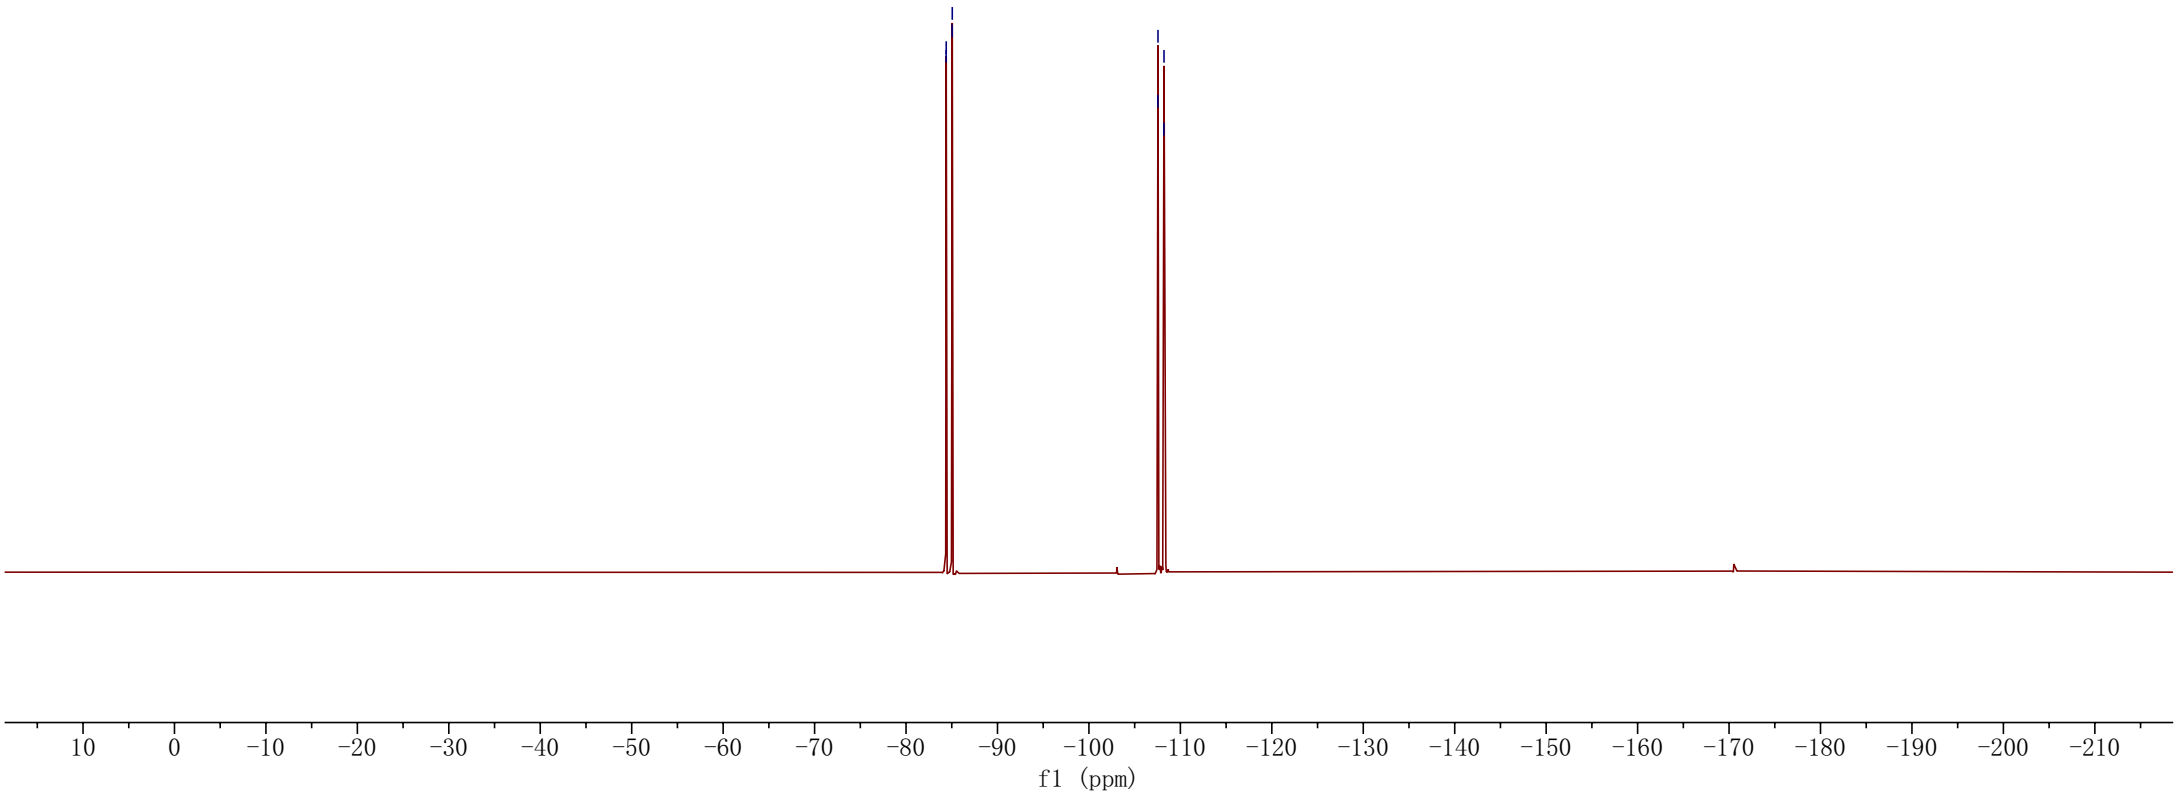

7.710  
7.707  
7.700  
7.697  
7.637  
7.633  
7.615  
7.612  
7.611  
7.607  
7.598  
7.595  
7.483  
7.465  
7.365  
7.362  
7.345  
7.325  
7.290  
7.272  
7.090  
7.080  
7.077  
7.068  
6.906  
6.887  
6.869  
6.867

4.282  
4.277  
4.239  
4.234

3.266  
3.223

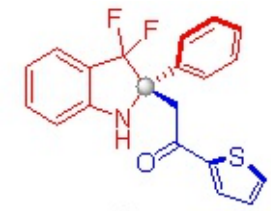

**3au**  
<sup>1</sup>H NMR (400 MHz, CDCl<sub>3</sub>)

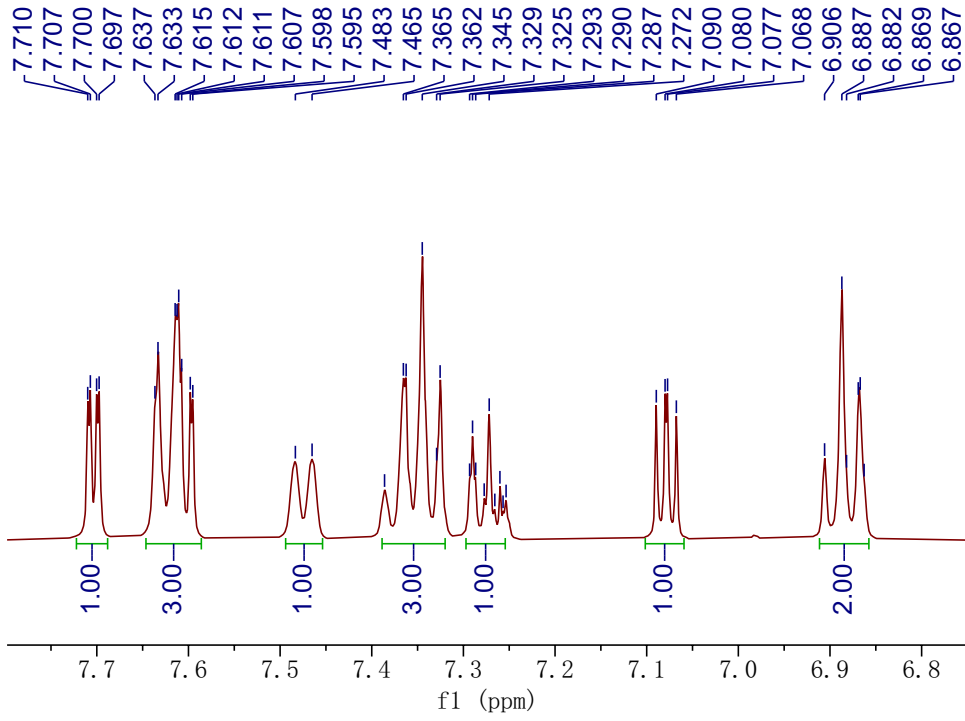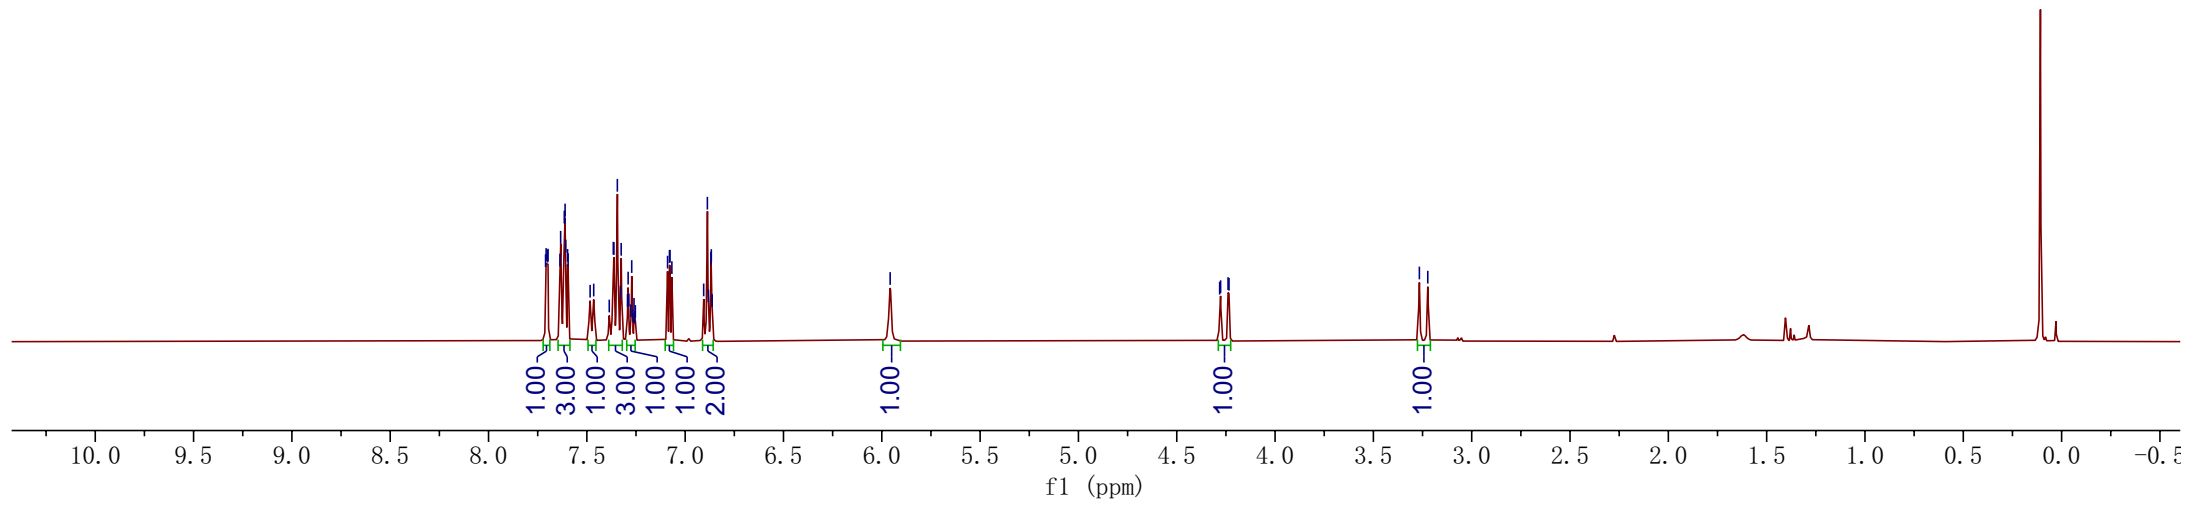

191.00  
190.98

149.56  
149.50  
149.48  
149.42  
144.09  
137.03  
136.97  
134.66  
133.02  
133.01  
132.64  
129.11  
128.23  
128.22  
127.79  
126.61  
126.54  
124.27  
124.12  
120.33  
120.08  
120.07  
119.82  
119.31  
111.45  
77.32  
77.00  
76.68  
72.19  
71.97  
71.91  
71.70  
42.74  
42.72  
42.64  
42.62

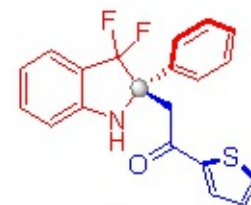

**3au**  
<sup>13</sup>C NMR (100 MHz, CDCl<sub>3</sub>)

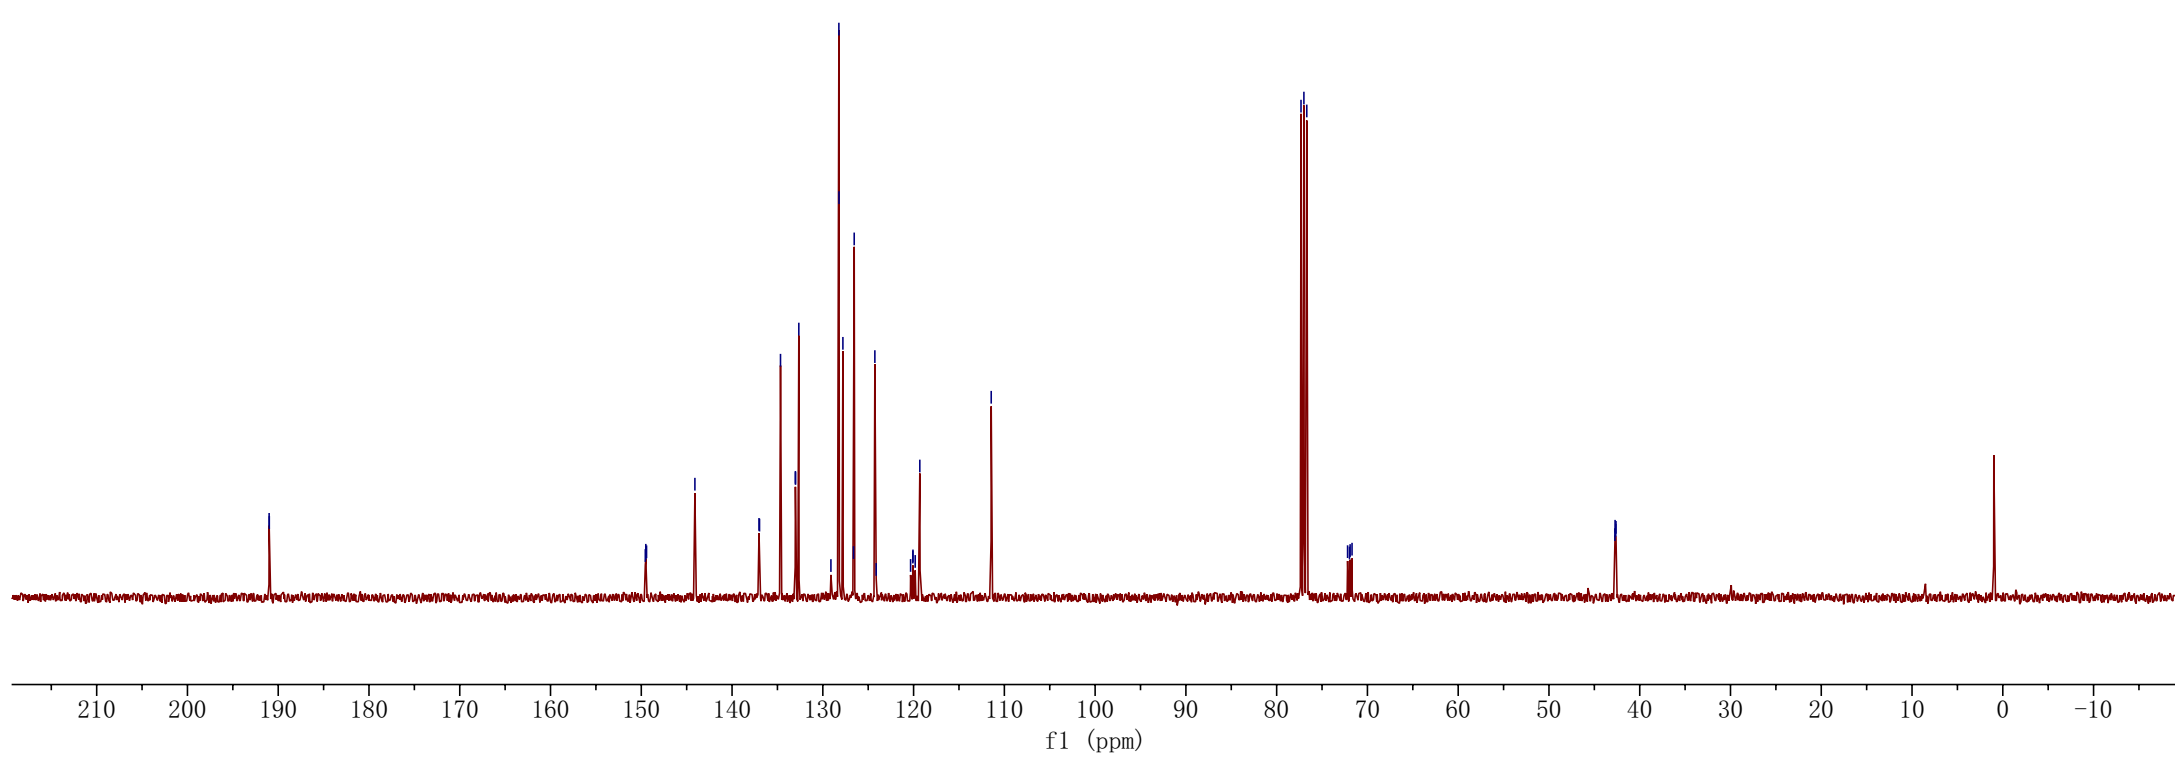

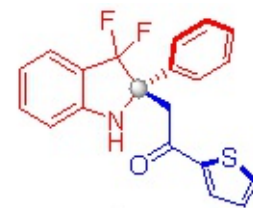

**3au**

<sup>19</sup>F NMR (376 MHz, CDCl<sub>3</sub>)

-84.295  
-84.954

-107.469  
-108.128

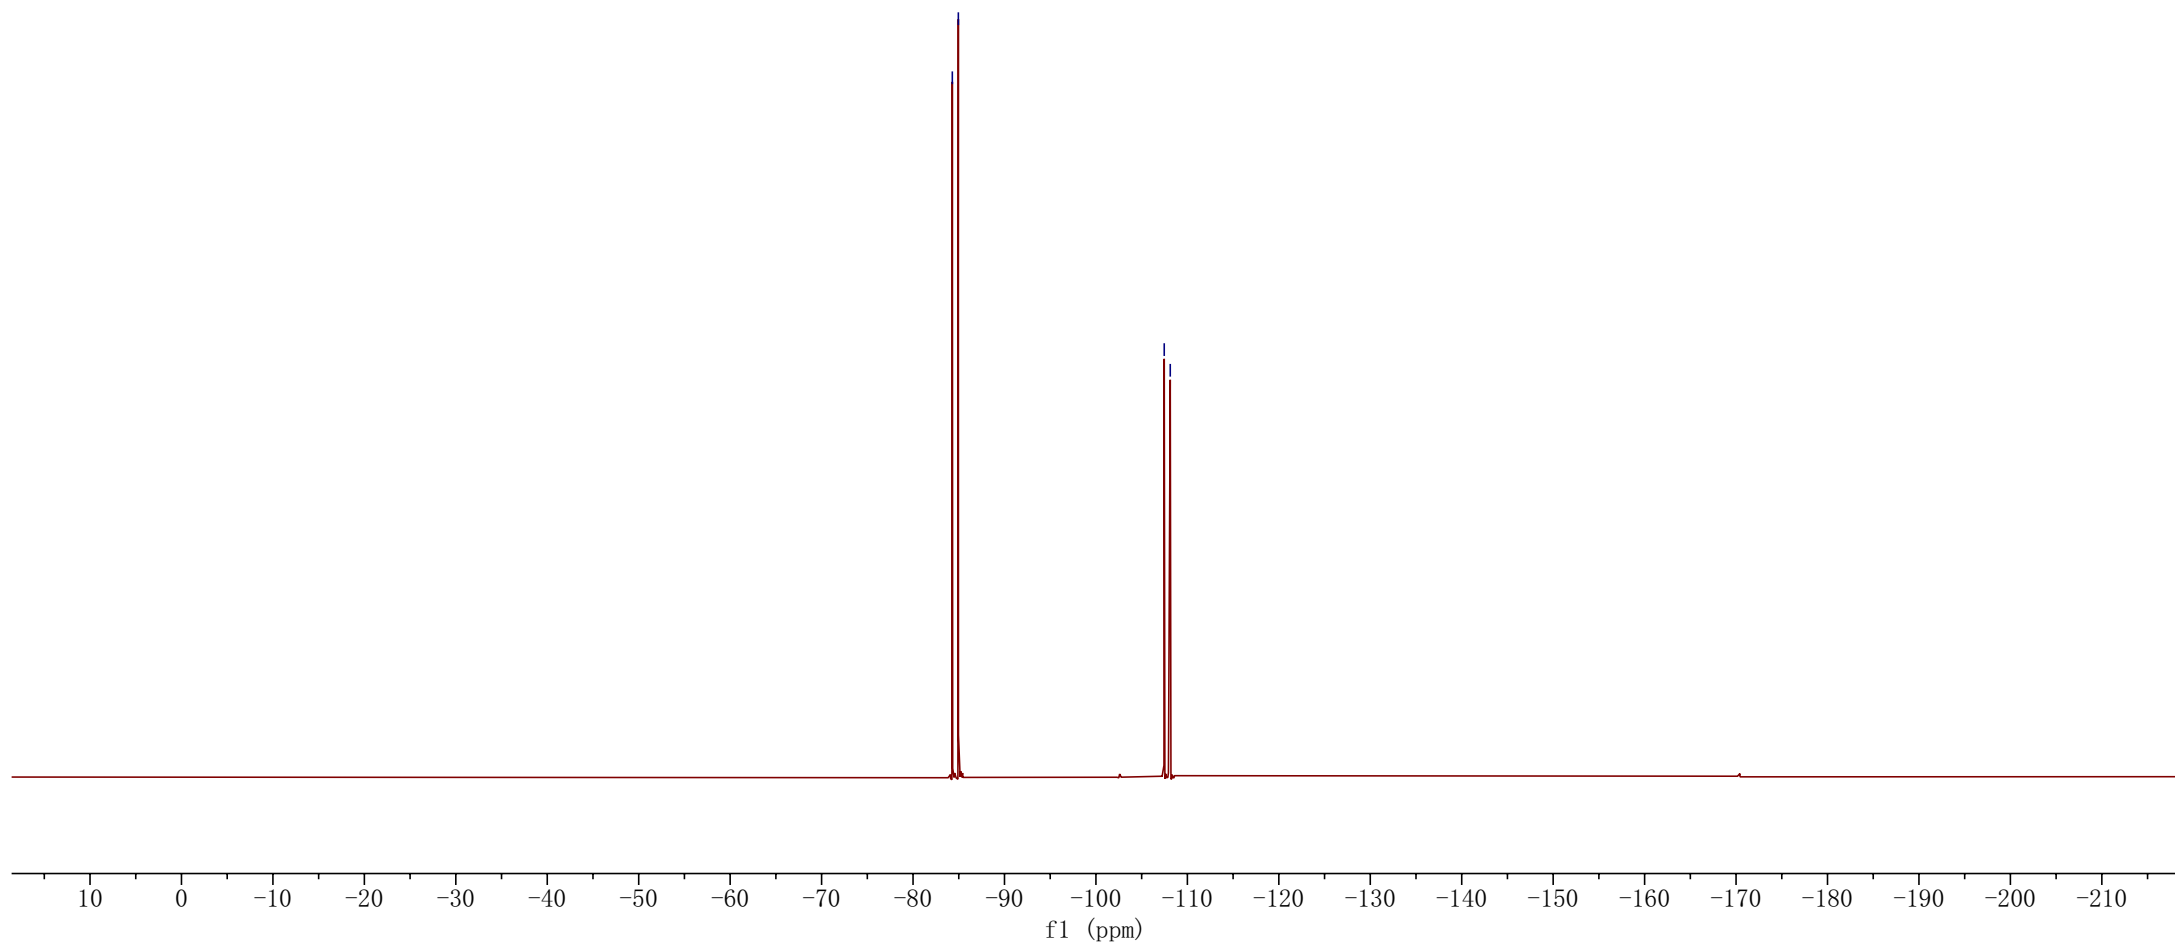



7.757  
7.754  
7.737  
7.733  
7.596  
7.577  
7.521  
7.507  
7.502  
7.498  
7.487  
7.484  
7.437  
7.419  
7.390  
7.371  
7.368  
7.356  
7.352  
7.336  
7.260  
7.234  
7.216  
7.197  
7.148  
7.145  
7.142  
7.127  
6.907  
6.887  
6.860  
6.842  
6.823  
6.959  
4.762  
4.744  
4.727

7.757  
7.754  
7.737  
7.733  
7.596  
7.577  
7.521  
7.502  
7.498  
7.484  
7.437  
7.419  
7.390  
7.371  
7.368  
7.356  
7.352  
7.336  
7.260  
7.234  
7.216  
7.197  
7.148  
7.145  
7.142  
7.127  
6.907  
6.887  
6.860  
6.842  
6.823  
6.823

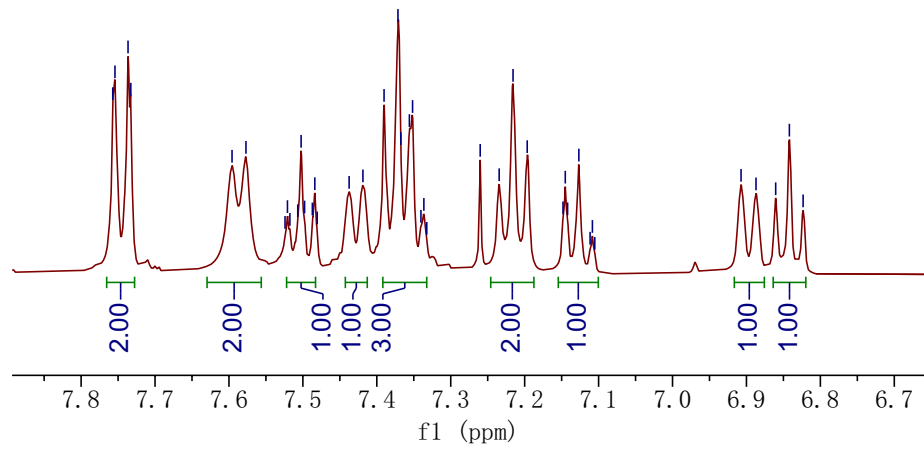

1.162  
1.145

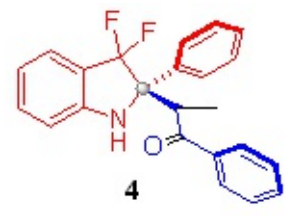

<sup>1</sup>H NMR (400 MHz, CDCl<sub>3</sub>)

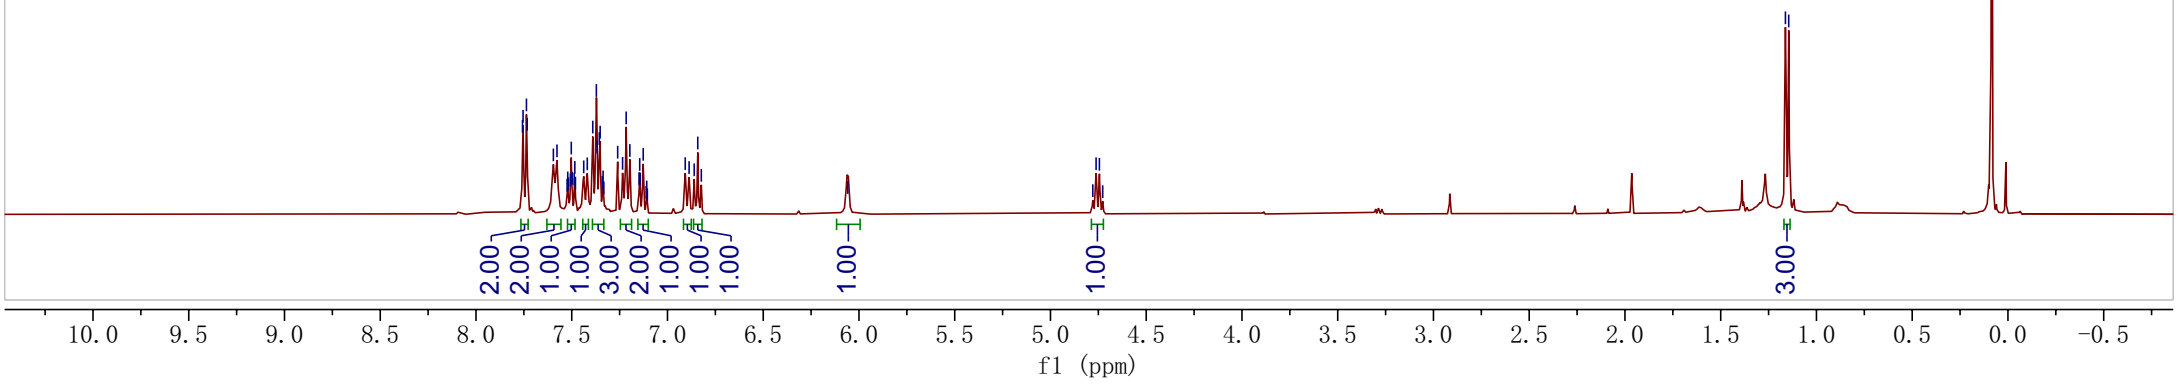

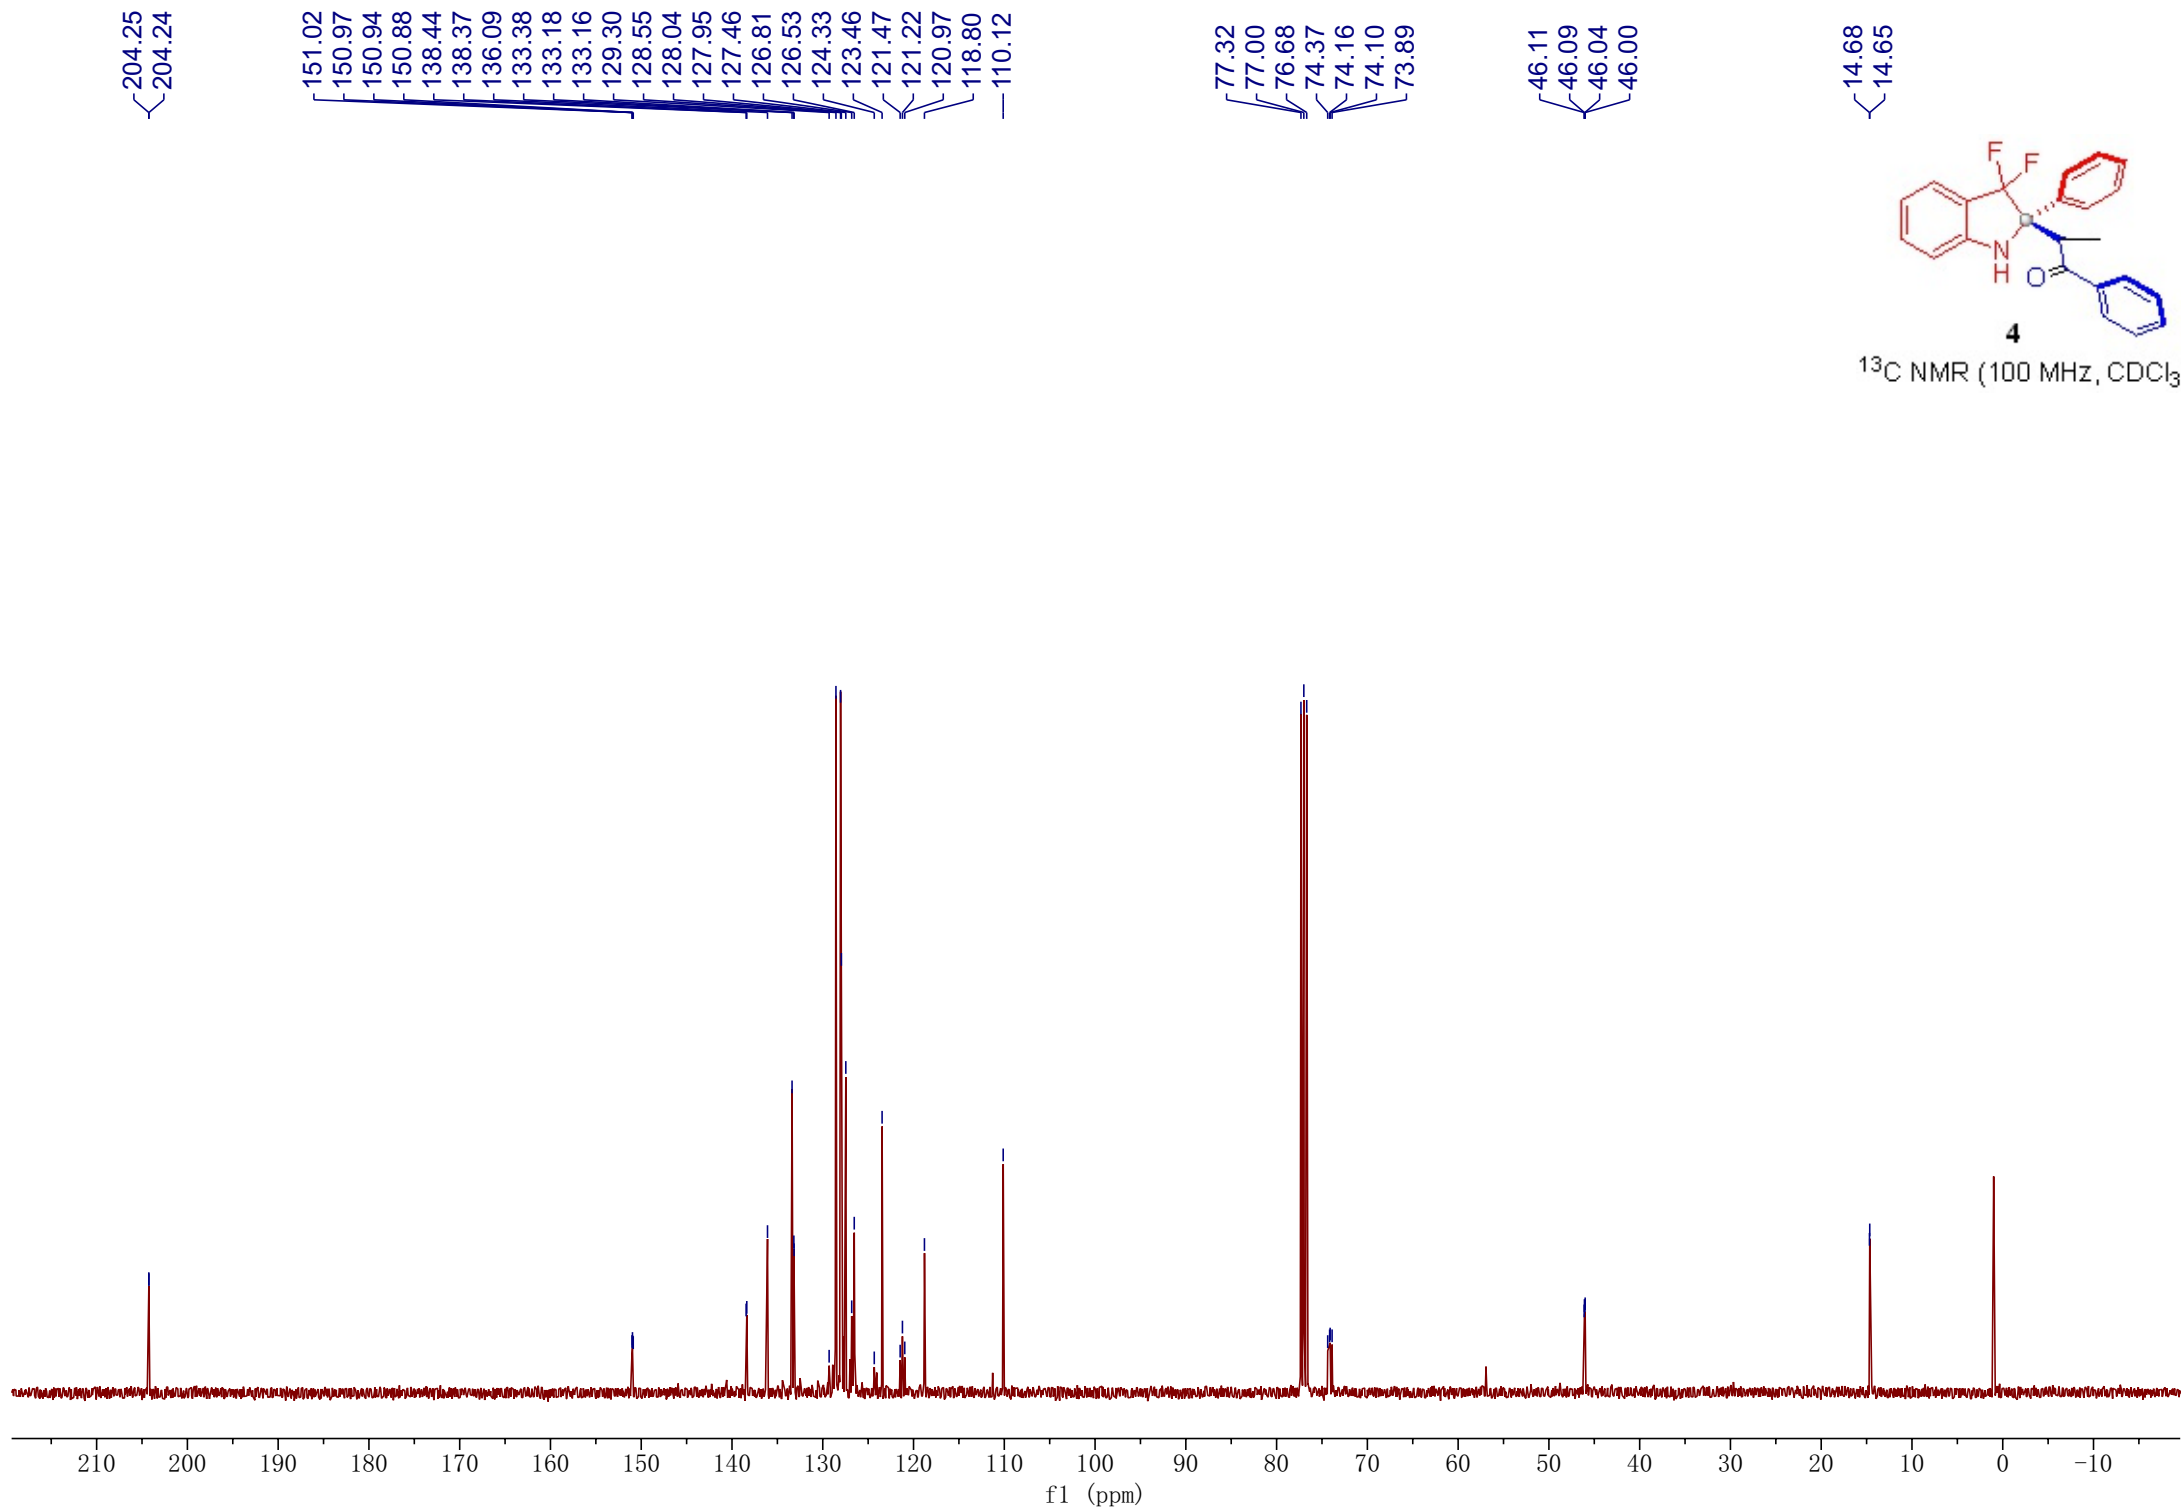

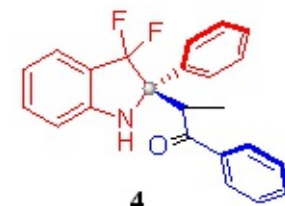

<sup>19</sup>F NMR (376 MHz, CDCl<sub>3</sub>)

-71.30  
-71.97

-107.27  
-107.95

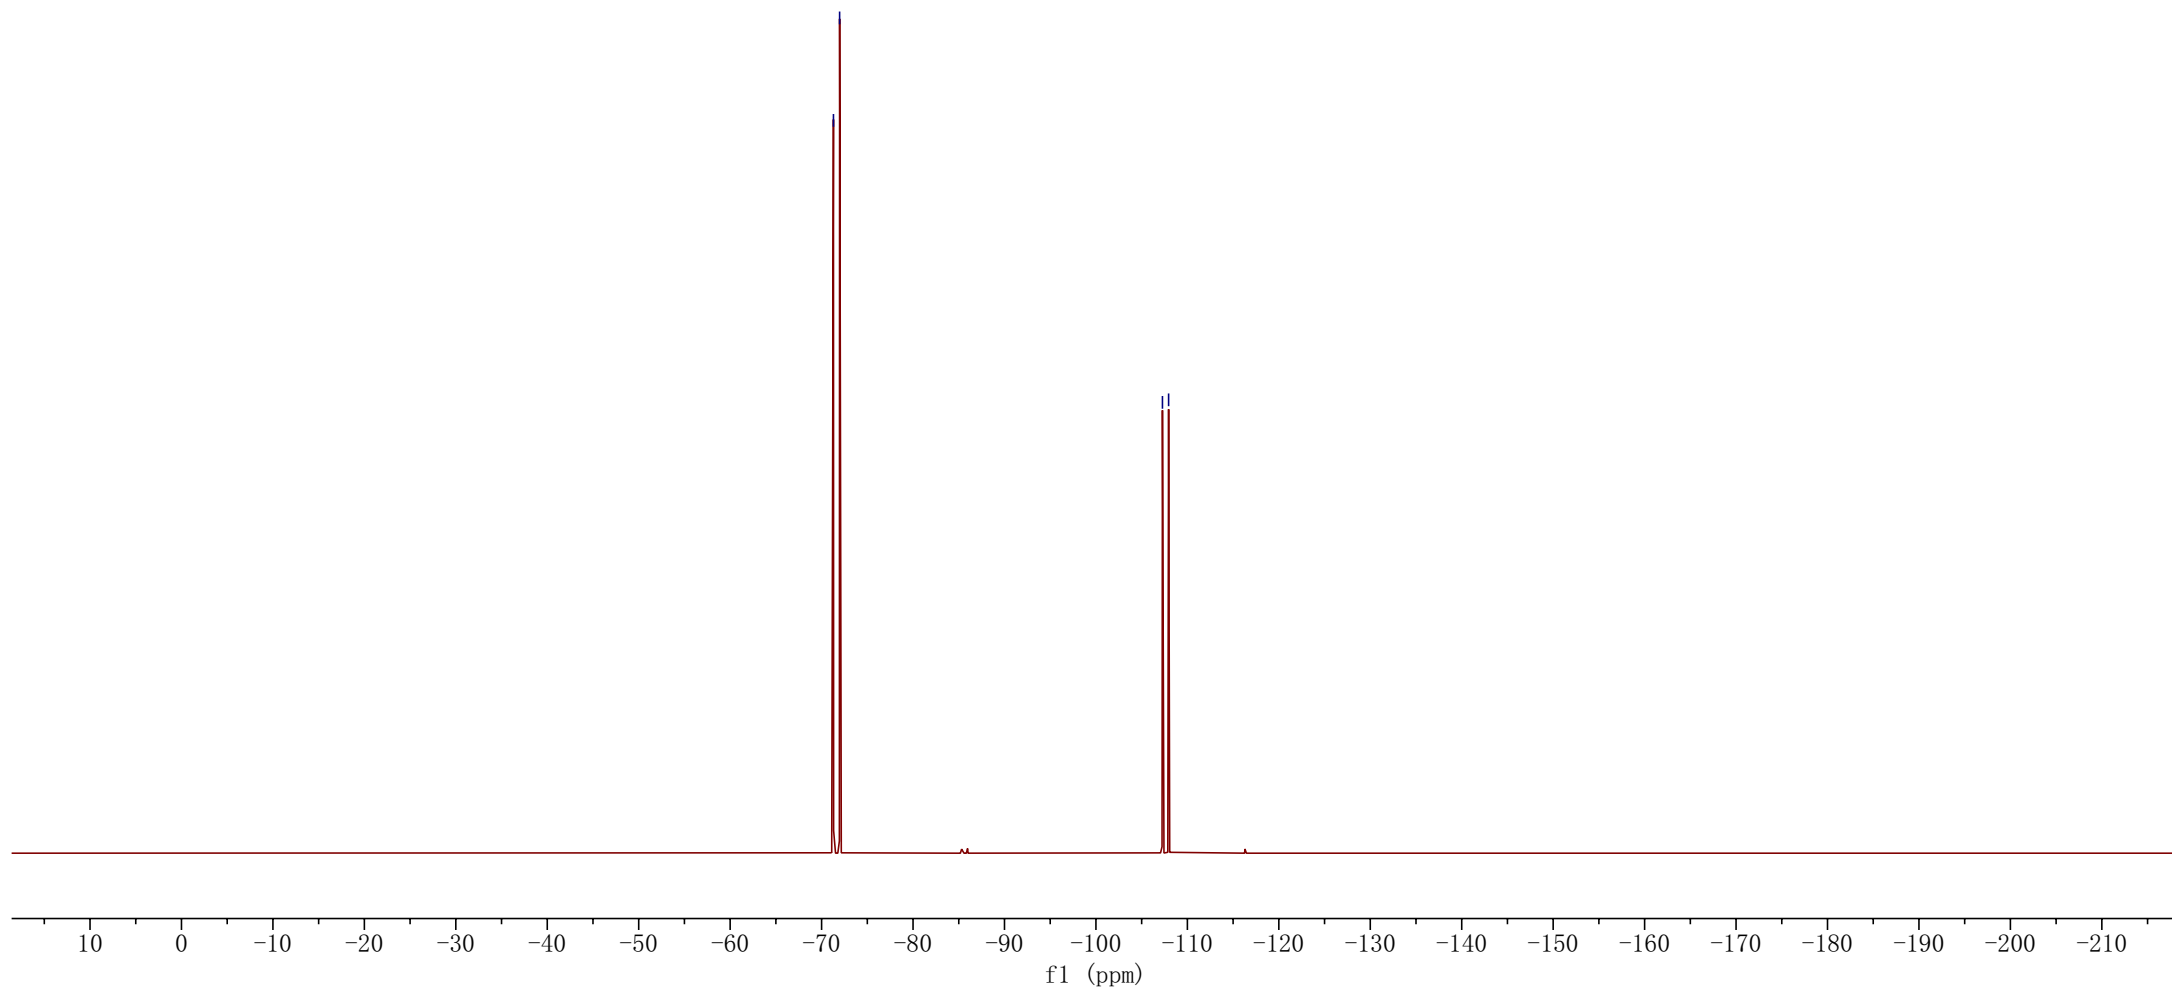

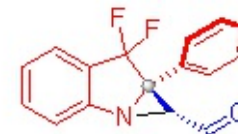

5

<sup>1</sup>H NMR (400 MHz, CDCl<sub>3</sub>)

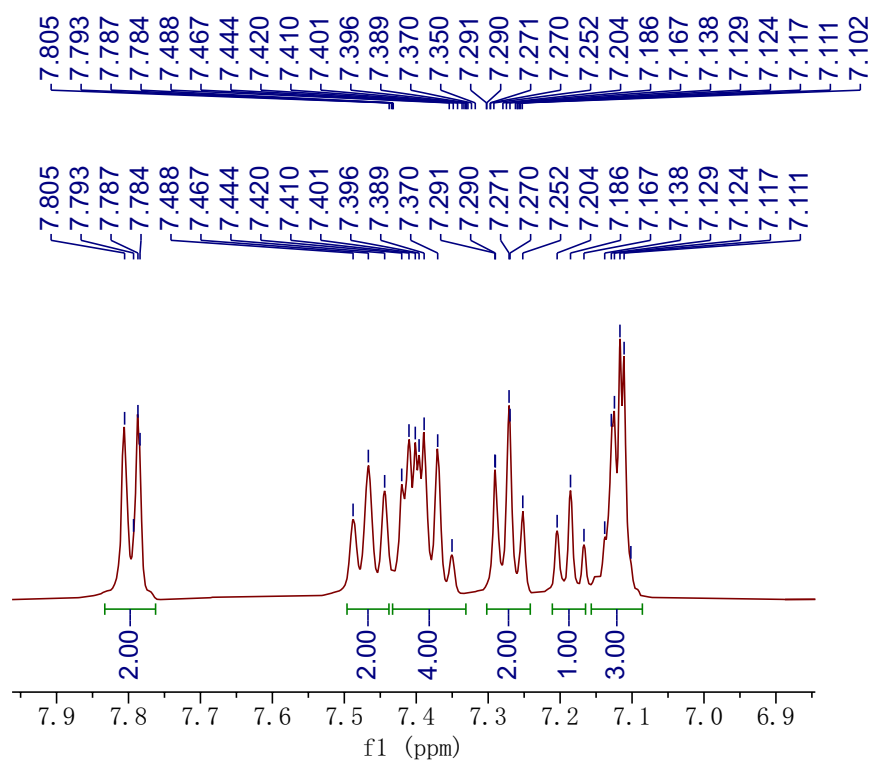

3.748  
3.744

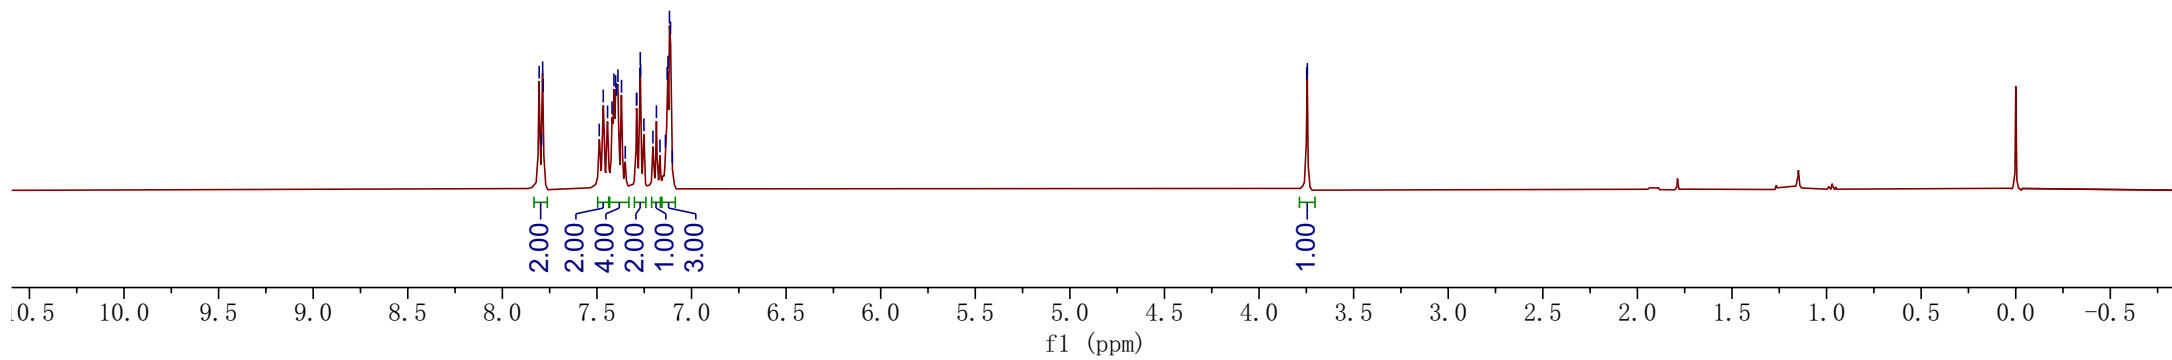

— 188.60

155.85  
155.77  
155.69  
135.31  
133.68  
132.71  
129.56  
129.31  
129.27  
129.02  
128.84  
128.63  
128.56  
128.27  
128.02  
127.76  
127.74  
126.62  
126.37  
124.95  
123.91  
120.78

77.32  
77.00  
76.68  
65.38  
59.77  
59.51  
59.44  
59.17

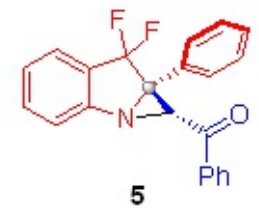

<sup>13</sup>C NMR (100 MHz, CDCl<sub>3</sub>)

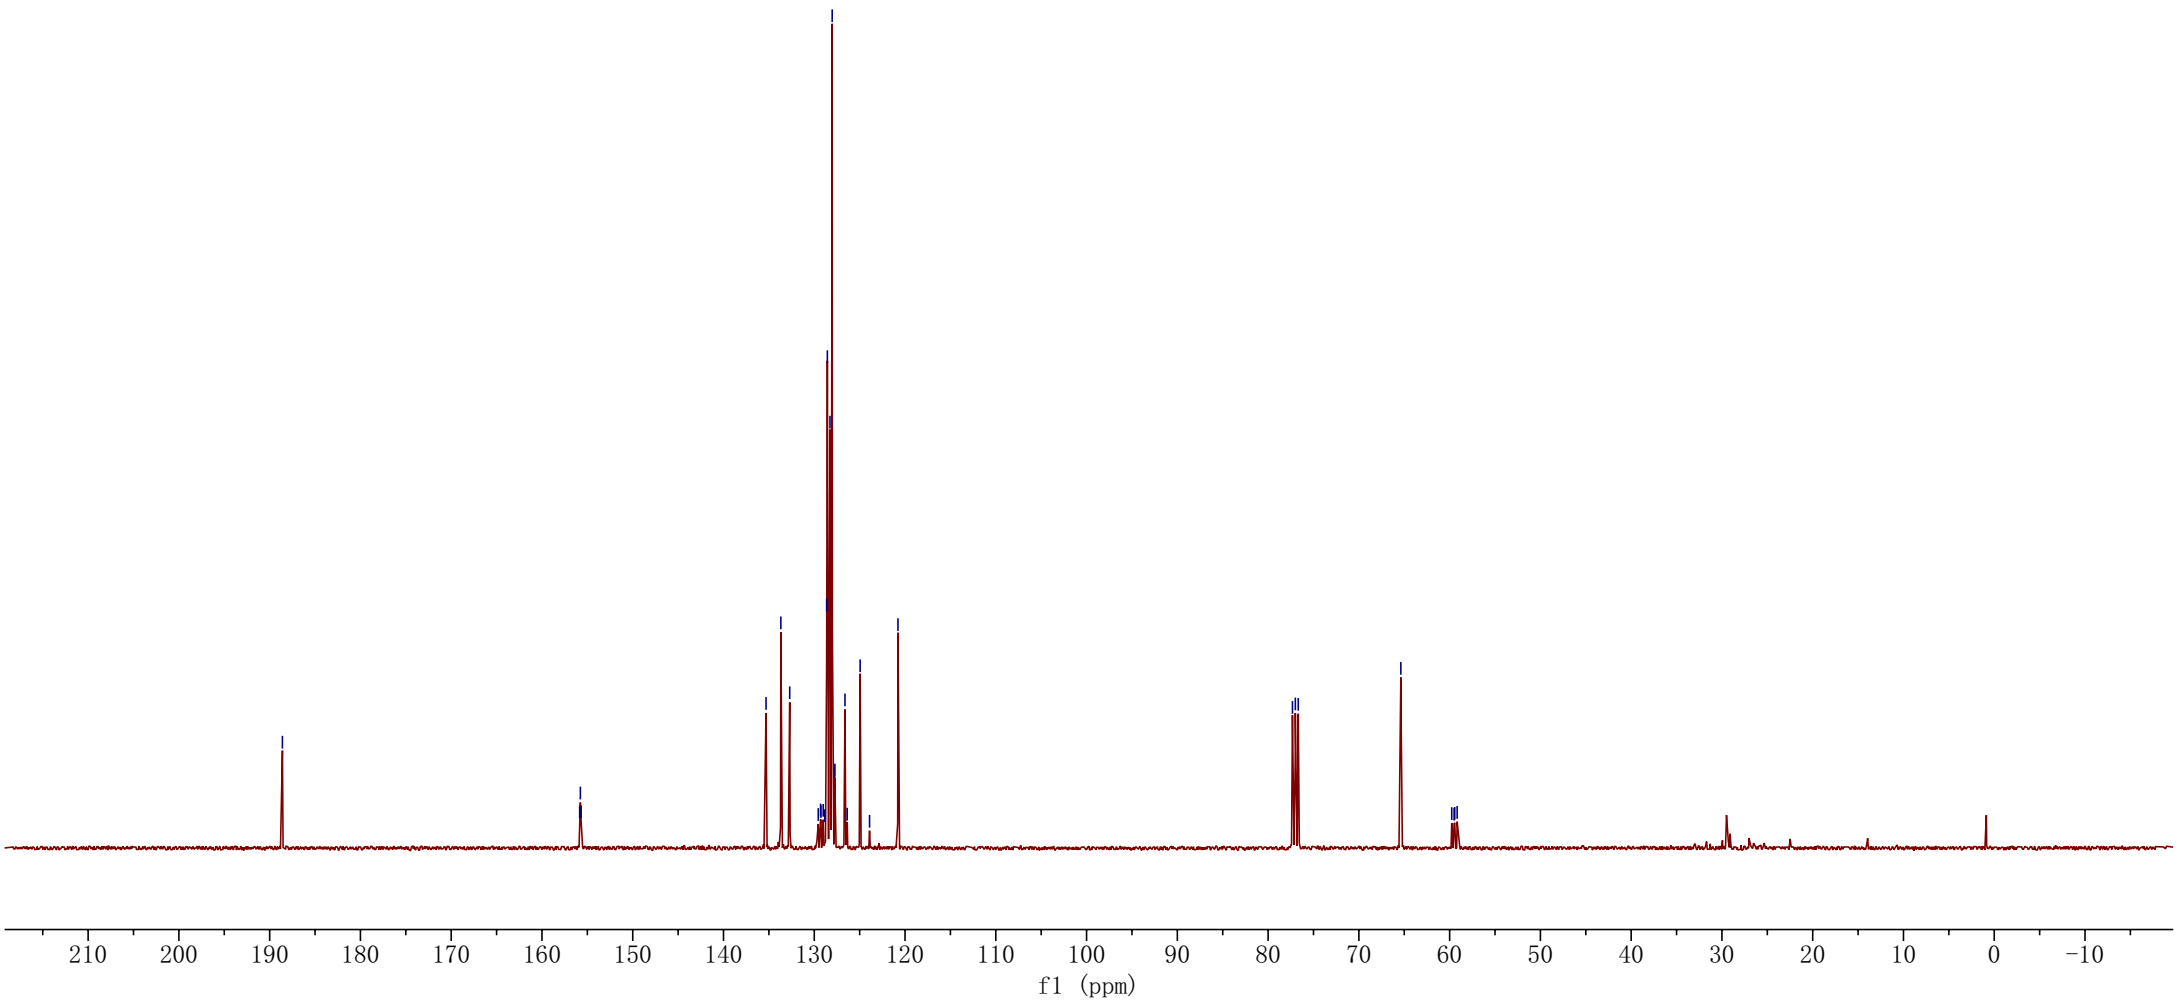

-83.80  
-84.49  
-87.84  
-88.53

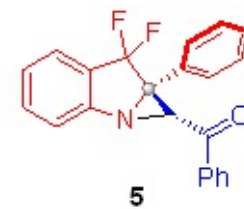

<sup>19</sup>F NMR (376 MHz, CDCl<sub>3</sub>)

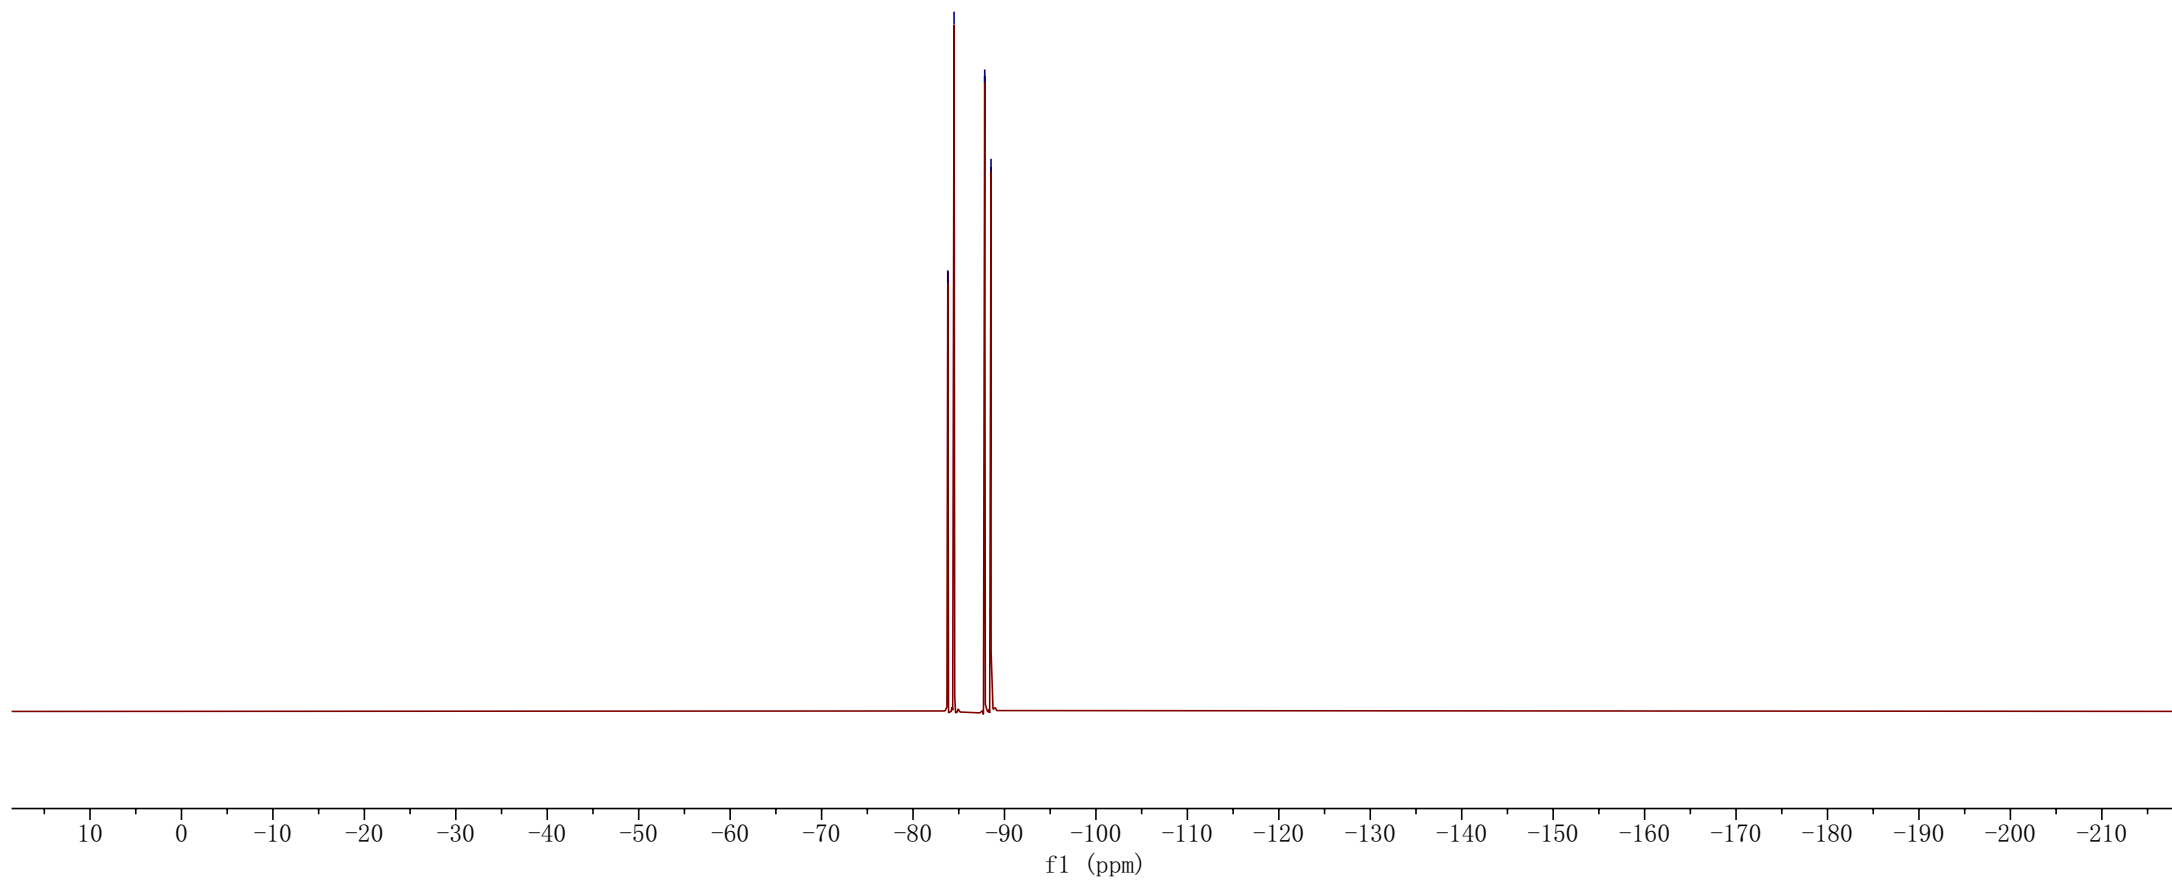

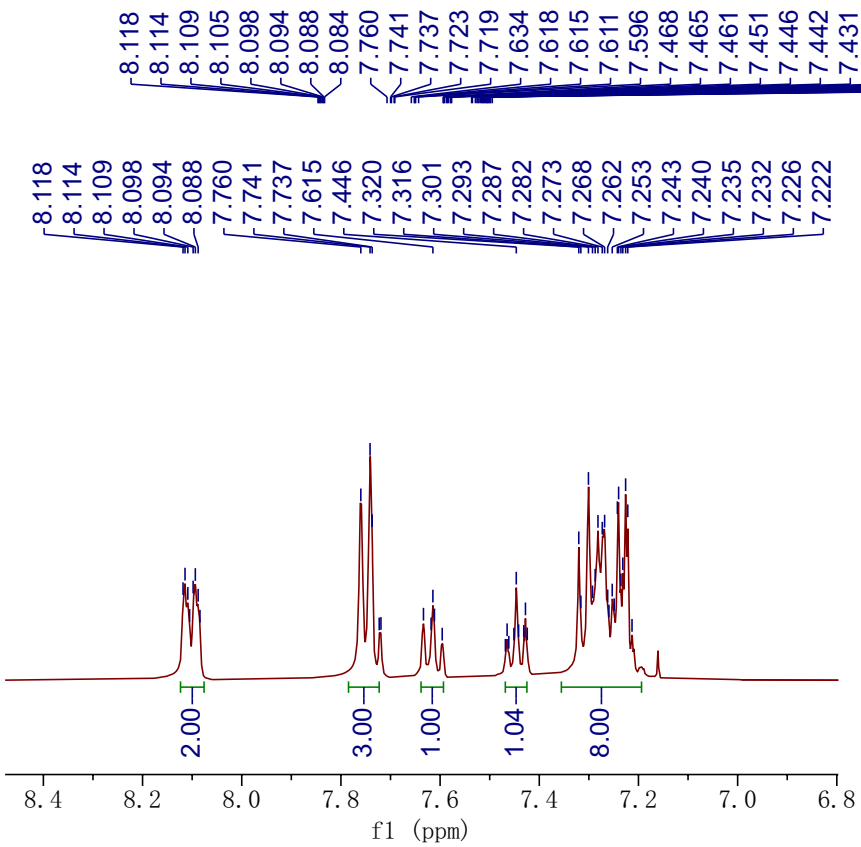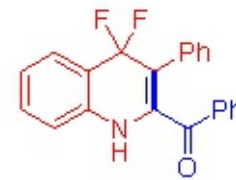

**6**  
<sup>1</sup>H NMR (400 MHz, CDCl<sub>3</sub>)

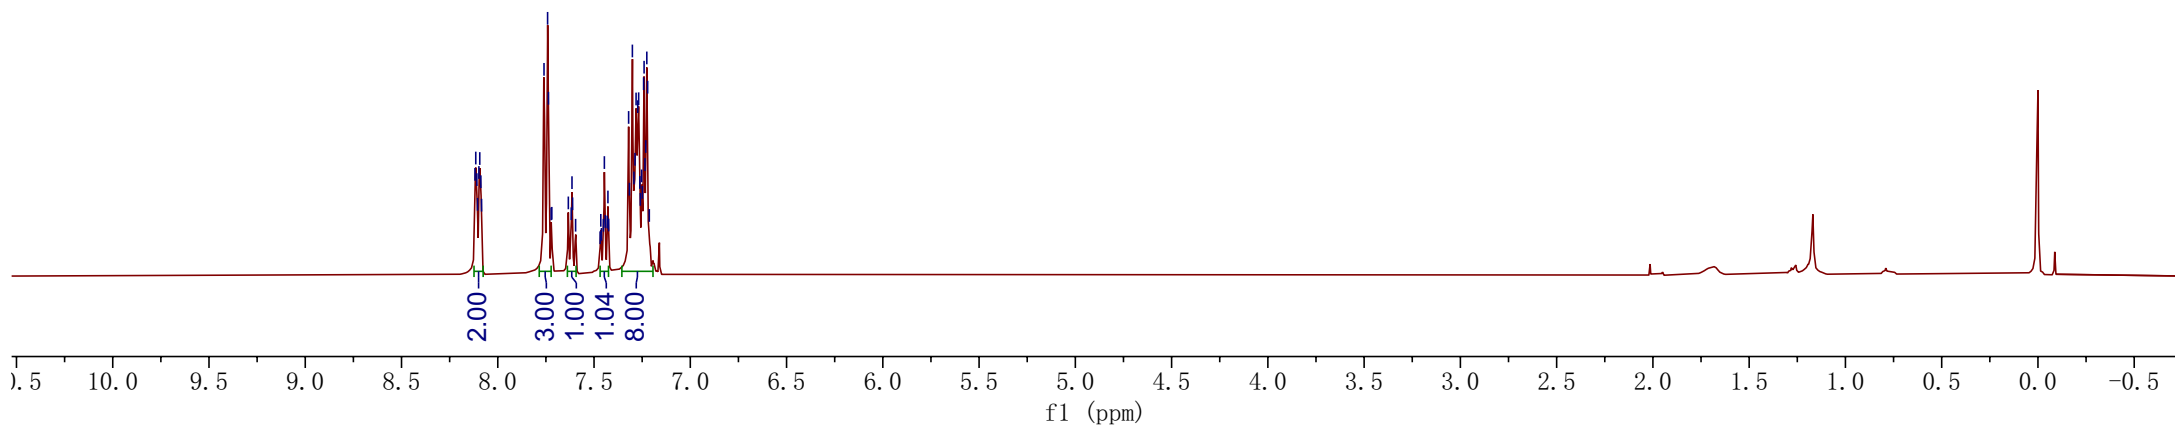

193.86  
193.82

163.25  
160.58  
158.16  
158.13

148.05  
147.99

135.78  
133.66  
131.01  
130.64  
130.30

130.09  
130.08  
129.48  
129.45  
128.39  
128.36  
128.16  
128.14

120.76  
120.70  
119.29  
119.27  
119.17  
119.12

77.32  
77.00  
76.68

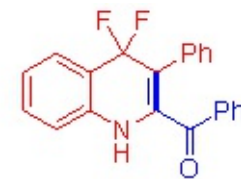

6

<sup>1</sup>H NMR (400 MHz, CDCl<sub>3</sub>)

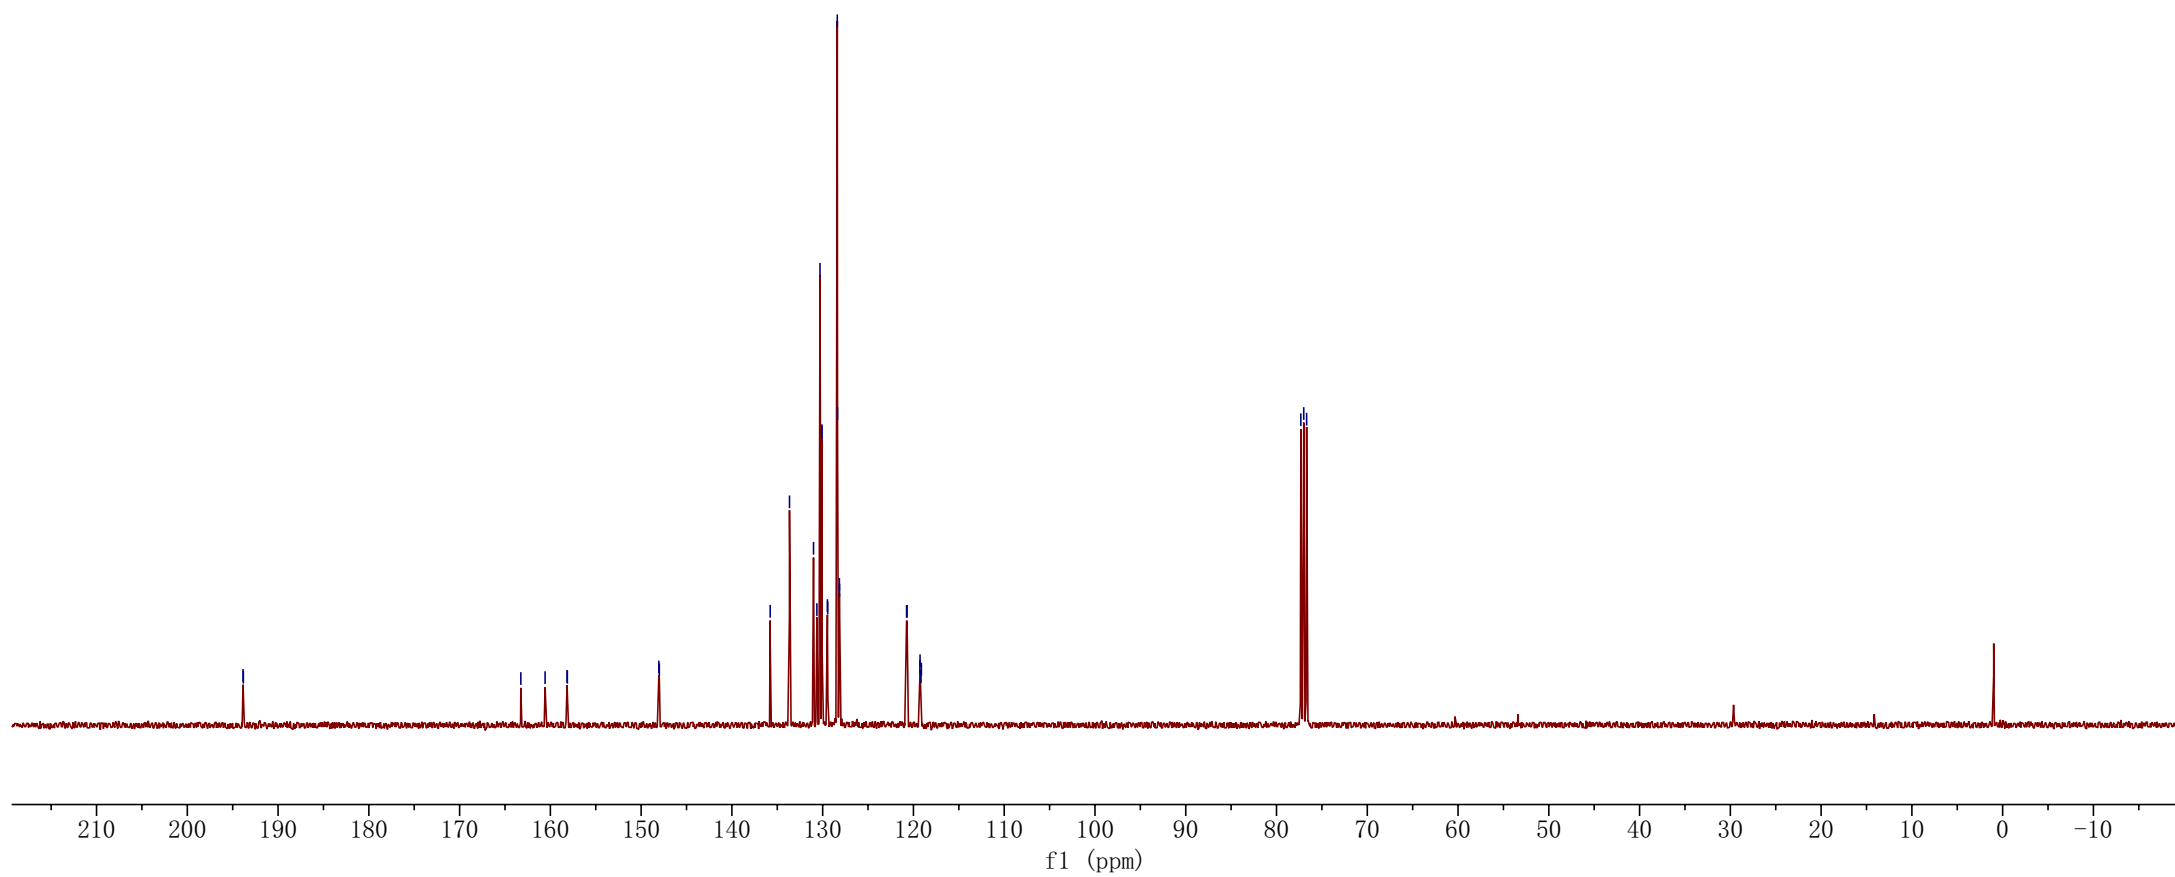



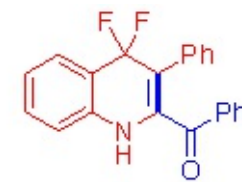

**6**

<sup>19</sup>F NMR (376 MHz, CDCl<sub>3</sub>)

--115.46

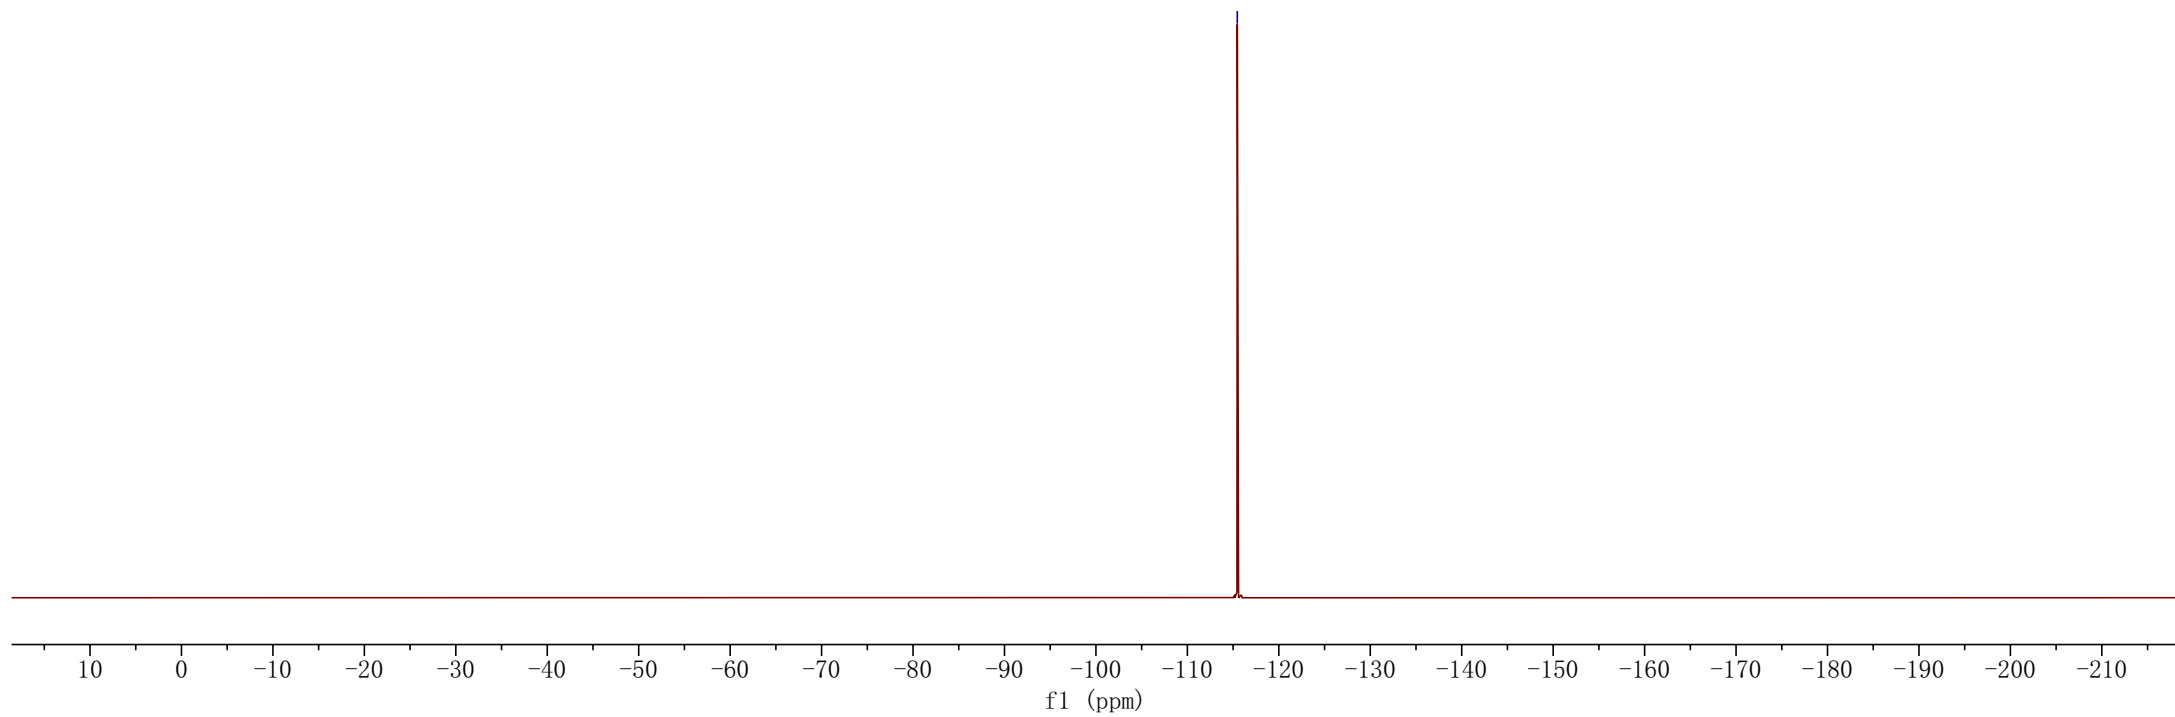

Supplement: d3qo02085a1.pdf [file d3qo02085a1.pdf]
